# Supplementary material for: Significance of CD8+ T cell infiltration-related biomarkers and the corresponding prediction model for the prognosis of kidney renal clear cell carcinoma
Source: publisher site journal article supplement (doi:10.18632/aging.203584), 2021-10-04
Supplement: Supplementary file [file aging-v13i19-203584-supplementary-material-SD7.pdf]

## SUPPLEMENTARY TABLE

**Supplementary Table 2. The cutoff values of the 6 prognostic genes.**

| <b>Gene</b> | <b>Cutoff</b> |
|-------------|---------------|
| PDK4        | 13.37         |
| MPP1        | 11.31         |
| ASGR1       | 5.7           |
| MS4A14      | 7.72          |
| FCER1A      | 6.36          |
| MX2         | 9.87          |

The first column was the name of the corresponding gene; the second column was the cutoff value of the corresponding gene.
