# Supplementary material for: Significance of CD8+ T cell infiltration-related biomarkers and the corresponding prediction model for the prognosis of kidney renal clear cell carcinoma
Source: Aging (Albany NY). 2021 Oct 4;13(19):22912–33. doi: 10.18632/aging.203584 (PMC8544304; doi:10.18632/aging.203584)
Supplement: Supplementary Material 1 [file aging-13-203584-s001.xls]

## Sheet: Sheet1
Supplementary Material 1. Cell lines annotations.
CCLE_ID	depMapID	Name	Pathology	Site_Primary	Site_Subtype1	Site_Subtype2	Site_Subtype3	Histology	Hist_Subtype1	Hist_Subtype2	Hist_Subtype3	Gender	Life_Stage	Age	Race	Geo_Loc	inferred_ethnicity	Site_Of_Finding	Disease	Annotation_Source	Original.Source.of.Cell.Line	Characteristics	Growth.Medium	Supplements	Freezing.Medium	Doubling.Time.from.Vendor	Doubling.Time.Calculated.hrs	type	type_refined	PATHOLOGIST_ANNOTATION	mutRate	tcga_code
DMS53_LUNG	ACH-000698	DMS 53	primary	lung	NS	NS	NS	carcinoma	small_cell_carcinoma	NS	NS	male		54	caucasian		Caucasian		lung_cancer	CCLE	ATCC	Adherent	Waymouth's +10%FBS	NA	5%DMSO		450	lung_small_cell	lung_small_cell	Lung:SCLC	157.242	SCLC
SW1116_LARGE_INTESTINE	ACH-000489	SW1116	primary	large_intestine	colon	NS	NS	carcinoma	adenocarcinoma	NS	NS	male		73	caucasian		Caucasian			CCLE	ATCC	Adherent	L15+10%FBS	NA	5%DMSO		123.2	colorectal	colorectal	Colorectal:Carcinoma	94.3732	COAD/READ
NCIH1694_LUNG	ACH-000431	NCI-H1694	metastasis	lung	NS	NS	NS	carcinoma	small_cell_carcinoma	NS	NS	male		61	caucasian		Caucasian	ascites		CCLE	ATCC	suspension line; lots of debris	DMEM:F12 (1:1) + 5% FBS	.005 mg/ml insulin, .01 mg/ml transferrin, 30nM sodium selenite, 10 nM hydrocortisone, 10 nM beta estradiol, 10 mM HEPES, 2 mM L-glutamine	5% DMSO		81.2	lung_small_cell	lung_small_cell	Lung:SCLC	109.535	SCLC
P3HR1_HAEMATOPOIETIC_AND_LYMPHOID_TISSUE	ACH-000707	P3HR-1	metastasis	haematopoietic_and_lymphoid_tissue	NS	NS	NS	lymphoid_neoplasm	Burkitt_lymphoma	NS	NS	male		7	african_american		African_american	ascites	Burkitts lymphoma	CCLE	NIBRI						NA	lymphoma_Burkitt	lymphoma_Burkitt	Lymphoma:NH_B_cell	166.456	DLBC
HUT78_HAEMATOPOIETIC_AND_LYMPHOID_TISSUE	ACH-000509	HuT 78	primary	haematopoietic_and_lymphoid_tissue	skin	NS	NS	lymphoid_neoplasm	mycosis_fungoides-Sezary_syndrome	NS	NS	male		53	caucasian		Caucasian		sezary_syndrome	CCLE	NIBRI						NA	lymphoma_other	T-cell_lymphoma_other	Lymphoma:NH_T_cell	118.218	NA
UMUC3_URINARY_TRACT	ACH-000522	UM-UC-3	primary	urinary_tract	bladder	NS	NS	carcinoma	transitional_cell_carcinoma	NS	NS	male		NA			Caucasian		bladder_cancer	CCLE	ATCC	Adherent epithelial	EMEM +10%FBS	NA	5%DMSO		386.7	urinary_tract	urinary_tract	Bladder:Carcinoma	124.708	BLCA
HOS_BONE	ACH-000613	HOS	primary	bone	NS	NS	NS	osteosarcoma	NS	NS	NS	female		13	caucasian		Caucasian			CCLE	GNF						NA	osteosarcoma	osteosarcoma	Bone:Sarcoma_Osteo	127.98	SARC
HUNS1_HAEMATOPOIETIC_AND_LYMPHOID_TISSUE	ACH-000829	HuNS1	primary	haematopoietic_and_lymphoid_tissue	NS	NS	NS	lymphoid_neoplasm	plasma_cell_myeloma	NS	NS	male		NA			Caucasian		myeloma	CCLE	NIBRI						NA	multiple_myeloma	multiple_myeloma	Lymphoma:Multiple_Myeloma	187.914	MM
AML193_HAEMATOPOIETIC_AND_LYMPHOID_TISSUE	ACH-000557	AML-193	primary	haematopoietic_and_lymphoid_tissue	NS	NS	NS	haematopoietic_neoplasm	acute_myeloid_leukaemia	M5	NS	female		13			African_american			CCLE	ATCC	suspension	IMDM+5%FBS	0.005mg/ml insulin, 0.005mg/ml transferrin and 5ng/ml GM-CSF	5% DMSO		80.3	AML	AML	Leukemia:AML	133.369	LAML
RVH421_SKIN	ACH-000614	RVH-421	metastasis	skin	NS	NS	NS	malignant_melanoma	NS	NS	NS	male		28	caucasian	europe	Caucasian	brain		CCLE		Adherent	RPMI1640+10%FBS	NA	5%DMSO		49.5	melanoma	melanoma	Skin:Melanoma	NA	SKCM
NCIH1184_LUNG	ACH-000523	NCI-H1184	metastasis	lung	NS	NS	NS	carcinoma	small_cell_carcinoma	NS	NS	male		42	caucasian		Caucasian	lymph_node		CCLE	ATCC	Mixed (lymphoblasts)	RPMI-1640 + 10% FBS	NA	5%DMSO		151.7	lung_small_cell	lung_small_cell	Lung:SCLC	134.156	SCLC
HCC2157_BREAST	ACH-000691	HCC2157	primary	breast	NS	NS	NS	carcinoma	ductal_carcinoma	NS	NS	female		48	african_american		African_american		ductal_carcinoma	CCLE	NIBRI						NA	breast	breast	NA	173.187	BRCA
TC71_BONE	ACH-000424	TC-71	primary	bone	NS	NS	NS	Ewings_sarcoma-peripheral_primitive_neuroectodermal_tumour	NS	NS	NS	male		22			Caucasian		Ewings_sarcoma	CCLE	NIBRI						NA	Ewings_Sarcoma	Ewings_sarcoma	Bone:Sarcoma_Ewing	116.192	SARC
NCIH2227_LUNG	ACH-000610	NCI-H2227	primary	lung	NS	NS	NS	carcinoma	small_cell_carcinoma	NS	NS	male		54	caucasian		Caucasian			CCLE	ATCC	mixed	DMEM:HAM's F12 1:1 +5% FBS	0.005 mg/ml Insulin, 0.01 mg/ml transferrin, 30 nM sodium selenite, 10 nM hydrocortisone, 10 nM beta estradiol, 10 mM HEPES, 1 mM L-glutamine	5%DMSO		187.6	lung_small_cell	lung_small_cell	Lung:SCLC	136.789	SCLC
COLO205_LARGE_INTESTINE	ACH-001039	COLO 205	metastasis	large_intestine	colon	NS	NS	carcinoma	adenocarcinoma	NS	NS	male		70	caucasian		Caucasian	ascites	colon_cancer	CCLE	NA	NA	NA	NA	NA	NA	NA	colorectal	colorectal	NA	NA	COAD/READ
SNU449_LIVER	ACH-000420	SNU-449	primary	liver	NS	NS	NS	carcinoma	hepatocellular_carcinoma	NS	NS	male		52	asian	korea	Asian		hepatocellular_cancer	CCLE	NIBRI						NA	liver	liver	Liver:HCC	153.599	LIHC
NCIH28_PLEURA	ACH-000648	NCI-H28	metastasis	pleura	NS	NS	NS	mesothelioma	NS	NS	NS	male		48	caucasian		African_american	pleura		CCLE	ATCC	adherent	RPMI+10%FBS	NA	10% DMSO		81.2	mesothelioma	mesothelioma	Lung:Mesothelioma	144.071	MESO
OV56_OVARY	ACH-000091	OV56	primary	ovary	NS	NS	NS	carcinoma	NS	NS	NS	female		46			Caucasian			CCLE	ECACC	adherent epithelial	DMEM:HAM's F12 1:1 +5% FBS	0.5 ug/ml hydrocortisone + 10ug/ml insulin	5%DMSO		148.6	ovary	ovary	Ovary:Carcinoma	85.7172	OV
JHOS4_OVARY	ACH-000584	JHOS-4	primary	ovary	NS	NS	NS	carcinoma	adenocarcinoma	NS	NS	female		44	asian		Asian			CCLE	RIKEN		DMEM:F12 + 10% FBS	0.1 mM NEAA	5% DMSO		127.3	ovary	ovary	Ovary:Carcinoma	160.566	OV
KYSE450_OESOPHAGUS	ACH-000865	KYSE-450	primary	oesophagus	middle_third	NS	NS	carcinoma	squamous_cell_carcinoma	NS	NS	male		59	asian	japan	Asian		well differentiated invasive eosphageal squamous cell carcinoma	CCLE	GNF					~ 30 hrs	NA	esophagus	esophagus	Oesophagus:Carcinoma	324.757	ESCA
RMUGS_OVARY	ACH-000701	RMUG-S	primary	ovary	NS	NS	NS	carcinoma	adenocarcinoma	NS	NS	female		62			Asian			CCLE	NIBRI						NA	ovary	ovary	Ovary:Carcinoma	178.917	OV
KLE_ENDOMETRIUM	ACH-000293	KLE	primary	endometrium	NS	NS	NS	carcinoma	adenocarcinoma	NS	NS	female		64	caucasian		Caucasian			CCLE	GNF						70.2	endometrium	endometrium	Endometrium:Carcinoma	96.2038	UCEC
HS895T_FIBROBLAST	ACH-000043	Hs 895.T	metastasis	skin	NS	NS	NS	malignant_melanoma	NS	NS	NS	female		48	caucasian		Caucasian	lung		CCLE	NIBRI						NA	melanoma	fibroblast_like	Skin:Melanoma	56.091	SKCM
LN229_CENTRAL_NERVOUS_SYSTEM	ACH-000595	LN-229	primary	central_nervous_system	brain	NS	NS	glioma	astrocytoma_Grade_IV	glioblastoma_multiforme	NS	female		60	caucasian		Caucasian			CCLE	NIBRI						NA	glioma	glioma	CNS:Glioma_HighGrade	139.422	GBM
P31FUJ_HAEMATOPOIETIC_AND_LYMPHOID_TISSUE	ACH-000770	P31/FUJ	primary	haematopoietic_and_lymphoid_tissue	NS	NS	NS	haematopoietic_neoplasm	acute_myeloid_leukaemia	M5	NS	male		NA	asian		Asian			CCLE	HSSRB	lymphocyte-like	RPMI 1640 medium with 10% fetal calf serum	NA		NA	NA	AML	AML	Leukemia:AML	220.931	LAML
RKN_SOFT_TISSUE	ACH-000505	RKN	primary	soft_tissue	smooth_muscle	ovary	NS	leiomyosarcoma	NS	NS	NS	female		45	asian	japan	Asian			CCLE	HSSRB	epithelial-like	Han's F12 medium 90% with 10% fetal bovine serum	NA		NA	NA	ovary	ovary	Soft_Tissue:Sarcoma_Leiomyo	165.947	SARC
PATU8988S_PANCREAS	ACH-000022	PA-TU-8988S	metastasis	pancreas	NS	NS	NS	carcinoma	ductal_carcinoma	NS	NS	female		64			Caucasian	liver		CCLE	DSMZ	Adherent epitheloid cells in monolayer	DMEM + 10%FBS	2mM L-Glutamine	10%DMSO		110	pancreas	pancreas	Pancreas:Carcinoma	82.4871	PAAD
NH6_AUTONOMIC_GANGLIA	ACH-000203	NH-6	primary	autonomic_ganglia	NS	NS	NS	neuroblastoma	NS	NS	NS	female		0.75			Asian		neuroblastoma	CCLE	HSSRB	fibroblast-like	alpha-MEM with 10% fetal calf serum	NA		NA	NA	neuroblastoma	neuroblastoma	PNET:Neuroblastoma	115.608	NB
SF126_CENTRAL_NERVOUS_SYSTEM	ACH-000609	SF126	primary	central_nervous_system	brain	NS	NS	glioma	astrocytoma	NS	NS			NA			Caucasian			CCLE	HSSRB	fibroblast-like	Eagle's minimal essential medium with 10% fetal bovine serum	NA		NA	NA	glioma	glioma	CNS:Glioma	136.299	GBM
RERFLCAD2_LUNG	ACH-000774	RERF-LC-Ad2	primary	lung	NS	NS	NS	carcinoma	adenocarcinoma	NS	NS	male		NA	asian		Asian			CCLE	HSSRB	adherent epithelial-like	RPMI-1640+10% FBS	NA	5% DMSO		70.1	lung_NSC	lung_NSC	Lung:NSCLC_Adeno	215.979	LUAD
OUMS23_LARGE_INTESTINE	ACH-000296	OUMS-23	primary	large_intestine	colon	NS	NS	carcinoma	adenocarcinoma	NS	NS			NA			Asian			CCLE	HSSRB	epithelial-like	Dulbecco's modified Eagle's medium with 10% fetal bovine serum	NA		NA	NA	colorectal	colorectal	Colorectal:Carcinoma	137.259	COAD/READ
SNGM_ENDOMETRIUM	ACH-000974	SNG-M	metastasis	endometrium	NS	NS	NS	carcinoma	adenocarcinoma	NS	NS	female		52	asian	japan	Asian	lymph_node	intermediately differentiated adenocarcinoma	CCLE	HSSRB	epithelial-like	Ham's F12 medium with 20% fetal bovine serum	NA		NA	NA	endometrium	endometrium	Endometrium:Carcinoma	788.423	UCEC
OUMS27_BONE	ACH-001150	OUMS-27	primary	bone	NS	NS	NS	chondrosarcoma	NS	NS	NS	male		NA			Asian			CCLE	HSSRB	Elongated polygonal	DMEM+10%FBS	NA	10%DMSO		NA	chondrosarcoma	chondrosarcoma	Bone:Sarcoma_Chondro	NA	SARC
PL45_PANCREAS	ACH-001171	PL45	primary	pancreas	NS	NS	NS	carcinoma	ductal_carcinoma	NS	NS	male		NA	caucasian		Caucasian			CCLE	NA	NA	NA	NA	NA	NA	NA	pancreas	pancreas	NA	NA	PAAD
NCIH2347_LUNG	ACH-000875	NCI-H2347	primary	lung	NS	NS	NS	carcinoma	adenocarcinoma	NS	NS	female		54	caucasian		Caucasian		lung_cancer	CCLE	ATCC	Mixed, majority adherent	RPMI 1640 +10% FBS	NA	5%DMSO		181.8	lung_NSC	lung_NSC	Lung:NSCLC_Adeno	250.704	LUAD
SW1990_PANCREAS	ACH-000155	SW 1990	primary	pancreas	NS	NS	NS	carcinoma	ductal_carcinoma	NS	NS	male		56	caucasian		Caucasian			CCLE	NIBRI						NA	pancreas	pancreas	Pancreas:Carcinoma	103.218	PAAD
HS940T_FIBROBLAST	ACH-000135	Hs 940.T	primary	skin	NS	NS	NS	malignant_melanoma	NS	NS	NS	male		57	caucasian		Caucasian			CCLE	GNF						NA	melanoma	fibroblast_like	Skin:Melanoma	81.5014	SKCM
HS611T_HAEMATOPOIETIC_AND_LYMPHOID_TISSUE	ACH-000069	Hs 611.T	primary	haematopoietic_and_lymphoid_tissue	spleen	NS	NS	lymphoid_neoplasm	Hodgkin_lymphoma	NS	NS	female		48			Caucasian			CCLE	NIBRI						NA	lymphoma_Hodgkin	lymphoma_Hodgkin	Lymphoma:Hodgkin	73.3058	NA
TOLEDO_HAEMATOPOIETIC_AND_LYMPHOID_TISSUE	ACH-000285	Toledo	primary	haematopoietic_and_lymphoid_tissue	NS	NS	NS	lymphoid_neoplasm	diffuse_large_B_cell_lymphoma	NS	NS	female	adult	NA	caucasian		Caucasian			CCLE	ATCC	suspension, lymphoblast	RPMI-1640 + 10% FBS	NA	5%DMSO		51.4	lymphoma_DLBCL	lymphoma_DLBCL	Lymphoma:NH_B_cell	88.115	DLBC
RERFGC1B_STOMACH	ACH-000144	RERF-GC-1B	metastasis	stomach	NS	NS	NS	carcinoma	NS	NS	NS	male		41	asian	japan	Asian	lymph_node		CCLE	NIBRI						NA	stomach	stomach	Gastric:Carcinoma	113.338	STAD
HT1080_SOFT_TISSUE	ACH-000054	HT-1080	metastasis	soft_tissue	fibrous_tissue_and_uncertain_origin	NS	NS	fibrosarcoma	NS	NS	NS	male		35	caucasian		Caucasian	acetabulum	fibrosarcoma_cancer	CCLE	ATCC	Epithelial Adherent	EMEM+10%FBS	NA	5%DMSO		42.7	soft_tissue	soft_tissue	Soft_Tissue:Sarcoma_Fibro	79.5879	SARC
NCIH2087_LUNG	ACH-000841	NCI-H2087	metastasis	lung	NS	NS	NS	carcinoma	adenocarcinoma	NS	NS	male		69	caucasian		Caucasian	lymph_node	lung_cancer	CCLE	ATCC		DMEM:F12 (1:1) + 10% FBS	0.02 mg/ml insulin, 0.01 mg/ml transferrin, 25 nM sodium selenite, 50 nM Hydrocortisone, 1 ng/ml EGF(don't filter), 0.01 mM ethanolamine, 0.01 mM phosphorylethanolamine, 100 pM triiodothyronine, 0.5% bovine serum albumin, 0.5 mM sodium pyruvate, 2mM L-glutamine, 10nM HEPES	5% DMSO		104.2	lung_NSC	lung_NSC	Lung:NSCLC_Adeno	212.099	LUAD
COV318_OVARY	ACH-000256	COV318	primary	ovary	NS	NS	NS	carcinoma	NS	NS	NS	female		NA			Caucasian			CCLE	ECACC	Polyglonal and fusiform adherent	DMEM + 10% FBS	2mM Glutamine	5%DMSO		93.1	ovary	ovary	Ovary:Carcinoma	99.5089	OV
NCIH2085_LUNG	ACH-000451	NCI-H2085	primary	lung	NS	NS	NS	carcinoma	adenocarcinoma	NS	NS	male		45			Caucasian			CCLE	ATCC		DMEM:F12 (1:1) + 10% FBS	0.02 mg/ml insulin, 0.01 mg/ml transferrin, 25 nM sodium selenite, 50 nM Hydrocortisone, 1 ng/ml EGF(don't filter), 0.01 mM ethanolamine, 0.01 mM phosphorylethanolamine, 100 pM triiodothyronine, 0.5% bovine serum albumin, 0.5 mM sodium pyruvate, 2mM L-glutamine, 10nM HEPES	5% DMSO		98.9	lung_NSC	lung_NSC	Lung:NSCLC_Adeno	111.568	LUAD
NCIH510_LUNG	ACH-000871	NCI-H510	primary	lung	NS	NS	NS	carcinoma	small_cell_carcinoma	NS	NS	male		56	caucasian		Caucasian			CCLE	ATCC	mixed line	F-12K ATCC + 10% FBS	NA	5% DMSO		979	lung_small_cell	lung_small_cell	Lung:SCLC	259.732	SCLC
CAKI1_KIDNEY	ACH-000433	Caki-1	metastasis	kidney	NS	NS	NS	carcinoma	clear_cell_renal_cell_carcinoma	NS	NS	male		49	caucasian		Caucasian	skin	clear_cell_carcinoma	CCLE	ATCC	Adherent epithelial.	McCoy's 5A +10%FBS	NA	5%DMSO		88.3	kidney	kidney	Kidney:Carcinoma	116.896	KIRC
NCIH716_LARGE_INTESTINE	ACH-000491	NCI-H716	metastasis	large_intestine	colon	NS	NS	carcinoma	adenocarcinoma	NS	NS	male		33	caucasian		Caucasian	ascites		CCLE	NIBRI						NA	colorectal	colorectal	Colorectal:Carcinoma	118.564	COAD/READ
NCIH2066_LUNG	ACH-000727	NCI-H2066	primary	lung	NS	NS	NS	carcinoma	small_cell_carcinoma	NS	NS	female		70	caucasian		Caucasian			CCLE	ATCC		DMEM:HAM's F12 1:1 (ATCC catalog # 30-2006) + 5% FBS	.005 mg/ml insulin, .01 mg/ml transferrin, 30nM sodium selenite, 10 nM hydrocortisone, 10 nM beta estradiol, 10 mM HEPES, 2 mM L-glutamine	5%DMSO		80.3	lung_small_cell	lung_small_cell	Lung:SCLC	161.43	SCLC
NCIH1341_LUNG	ACH-000129	NCI-H1341	metastasis	lung	NS	NS	NS	carcinoma	small_cell_carcinoma	NS	NS	female		NA			Caucasian	cervix		CCLE	ATCC	Suspension	RPMI-1640 + 5% FBS	NA	10%DMSO		131.8	lung_small_cell	lung_small_cell	Lung:SCLC	84.0245	SCLC
NCIH2029_LUNG	ACH-000298	NCI-H2029	metastasis	lung	NS	NS	NS	carcinoma	small_cell_carcinoma	NS	NS	female		69	caucasian		Caucasian	lymph_node		CCLE	ATCC		DMEM:HAM's F12 1:1 + 5% FBS	.005 mg/ml insulin, .01 mg/ml transferrin, 30nM sodium selenite, 10 nM hydrocortisone, 10 nM beta estradiol, 10 mM HEPES, 2 mM L-glutamine	5%DMSO		171.6	lung_small_cell	lung_small_cell	Lung:SCLC	89.9004	SCLC
C3A_LIVER	ACH-001021	C3A	primary	liver	NS	NS	NS	carcinoma	hepatocellular_carcinoma	NS	NS	male		15	caucasian		Caucasian			CCLE	NA	NA	NA	NA	NA	NA	NA	liver	liver	NA	NA	LIHC
SW480_LARGE_INTESTINE	ACH-000842	SW480	primary	large_intestine	colon	NS	NS	carcinoma	adenocarcinoma	NS	NS	male		50	caucasian		Caucasian		colon_cancer	CCLE	ATCC	Epithelial adherent	L15+10%FBS	NA	5%DMSO		56.4	colorectal	colorectal	Colorectal:Carcinoma	240.128	COAD/READ
HS746T_STOMACH	ACH-000616	Hs 746T	metastasis	stomach	NS	NS	NS	carcinoma	NS	NS	NS	male		74	caucasian		Caucasian	muscle		CCLE	NIBRI						NA	stomach	stomach	Gastric:Carcinoma	130.837	STAD
LU65_LUNG	ACH-000438	LU65	primary	lung	NS	NS	NS	carcinoma	non_small_cell_carcinoma	NS	NS	male		64	asian		Asian		lung_cancer	CCLE	JCRB	Lymphocyte like with partially attached cells	RPMI 1640+10%FBS	NA	5% DMSO		NA	lung_NSC	lung_NSC	Lung:NSCLC_Large_Cell	139.791	NA
HS739T_FIBROBLAST	ACH-000413	Hs 739.T	primary	breast	NS	NS	NS	carcinoma	NS	NS	NS	female		52	asian		Asian			CCLE							NA	breast	fibroblast_like	NA	147.007	NA
SNUC2A_LARGE_INTESTINE	ACH-000967	SNU-C2A	primary	large_intestine	caecum	NS	NS	carcinoma	adenocarcinoma	NS	NS	female		43	asian		Asian			CCLE	NIBRI						NA	colorectal	colorectal	Colorectal:Carcinoma	667.191	COAD/READ
HEC151_ENDOMETRIUM	ACH-000972	HEC-151	primary	endometrium	NS	NS	NS	carcinoma	adenocarcinoma	NS	NS	female		NA	asian		Asian			CCLE	HSSRB	epithelial-like	Eagle's minimal essential medium with 15% fetal calf serum	NA		NA	NA	endometrium	endometrium	Endometrium:Carcinoma	741.771	UCEC
MSTO211H_PLEURA	ACH-000335	MSTO-211H	metastasis	pleura	NS	NS	NS	mesothelioma	NS	NS	NS	male		62	caucasian		Caucasian	pleura	lung_cancer	CCLE	ATCC	adherenet	RPMI+10%FBS	NA	5% DMSO		35.6	mesothelioma	mesothelioma	Lung:Mesothelioma	124.151	MESO
RAJI_HAEMATOPOIETIC_AND_LYMPHOID_TISSUE	ACH-000654	Raji	primary	haematopoietic_and_lymphoid_tissue	NS	NS	NS	lymphoid_neoplasm	Burkitt_lymphoma	NS	NS	male		12	african		African_american		lymphoma	CCLE	NIBRI						NA	lymphoma_Burkitt	lymphoma_Burkitt	Lymphoma:NH_B_cell	170.455	DLBC
SKMEL1_SKIN	ACH-000465	SK-MEL-1	metastasis	skin	NS	NS	NS	malignant_melanoma	NS	NS	NS	male		29	caucasian		Caucasian	lymph_node		CCLE	NIBRI						NA	melanoma	melanoma	Skin:Melanoma	112.654	SKCM
SUPT1_HAEMATOPOIETIC_AND_LYMPHOID_TISSUE	ACH-000953	SUP-T1	metastasis	haematopoietic_and_lymphoid_tissue	NS	NS	NS	lymphoid_neoplasm	acute_lymphoblastic_T_cell_leukaemia	NS	NS	male		8	caucasian		Caucasian	pleura		CCLE	NIBRI						NA	T-cell_ALL	T-cell_ALL	Leukemia:ALL	509.77	ALL
JHH7_LIVER	ACH-000848	JHH-7	primary	liver	NS	NS	NS	carcinoma	hepatocellular_carcinoma	NS	NS	male		53	asian	japan	Asian			CCLE	NIBRI						NA	liver	liver	Liver:HCC	257.29	LIHC
HUT102_HAEMATOPOIETIC_AND_LYMPHOID_TISSUE	ACH-000612	HuT 102	primary	haematopoietic_and_lymphoid_tissue	skin	NS	NS	lymphoid_neoplasm	mycosis_fungoides-Sezary_syndrome	NS	NS	male		26	african_american		African_american		mycosis_fungoides	CCLE	ATCC	suspension	RPMI+10%FBS		5%DMSO		NA	lymphoma_other	T-cell_lymphoma_other	NA	135.581	NA
5637_URINARY_TRACT	ACH-000905	5637	primary	urinary_tract	bladder	NS	NS	carcinoma	NS	NS	NS	male		68	caucasian		Asian			CCLE		adherent	RPMI1640+10%FBS	NA	5%DMSO		60.9	urinary_tract	urinary_tract	Bladder:Carcinoma	278.02	BLCA
HCC38_BREAST	ACH-000276	HCC38	primary	breast	NS	NS	NS	carcinoma	ductal_carcinoma	NS	NS	female		50	caucasian		Caucasian		breast_cancer	CCLE	ATCC	adherent, single cells and loosely attached clusters	RPMI-1640 + 10% FBS	NA	5%DMSO		103.3	breast	breast	Breast:Carcinoma	96.7598	BRCA
DU4475_BREAST	ACH-000258	DU4475	metastasis	breast	NS	NS	NS	carcinoma	ductal_carcinoma	NS	NS	female		62	caucasian		Caucasian	breast	breast_cancer	CCLE	ATCC	suspension, multicell aggregates	RPMI-1640 + 10% FBS	NA	5%DMSO		145.6	breast	breast	Breast:Carcinoma	107.287	BRCA
NCIH1573_LUNG	ACH-000916	NCI-H1573	metastasis	lung	NS	NS	NS	carcinoma	adenocarcinoma	NS	NS	female		35	caucasian		Caucasian	soft_tissue		CCLE	ATCC	Adherent	DMEM/F12(1:1) +10 % FBS	.02 mg/ml insulin, .01 mg/ml transferrin, 25nM sodium selenite, 1ng/mL EGF, 50 nM hydrocortisone, 2 mM L-glutamine, 0.5 sodium pyruvate	5% DMSO		118.2	lung_NSC	lung_NSC	Lung:NSCLC_Adeno	337.285	LUAD
NCIH508_LARGE_INTESTINE	ACH-000360	NCI-H508	metastasis	large_intestine	caecum	NS	NS	carcinoma	adenocarcinoma	NS	NS	male		55	caucasian		Caucasian	abdominal_wall		CCLE	NIBRI						NA	colorectal	colorectal	Colorectal:Carcinoma	94.0312	COAD/READ
NCIH1651_LUNG	ACH-000893	NCI-H1651	primary	lung	NS	NS	NS	carcinoma	adenocarcinoma	NS	NS	male		71			Caucasian			CCLE	ATCC	adherent	DMEM:F12 (1:1) + 10% FBS	0.02 mg/ml insulin, 0.01 mg/ml transferrin, 25 nM sodium selenite, 50 nM Hydrocortisone, 1 ng/ml EGF(don't filter), 0.01 mM ethanolamine, 0.01 mM phosphorylethanolamine, 100 pM triiodothyronine, 0.5% bovine serum albumin, 0.5 mM sodium pyruvate, 2mM L-glutamine, 10nM HEPES	5% DMSO		138.7	lung_NSC	lung_NSC	Lung:NSCLC_Adeno	272.22	LUAD
SKUT1_SOFT_TISSUE	ACH-000939	SK-UT-1	primary	soft_tissue	smooth_muscle	uterus	NS	leiomyosarcoma	NS	NS	NS	female		75	caucasian		Caucasian			CCLE	ATCC	adherent epithelial	EMEM + 10% FBS	NA	5%DMSO		41.6	soft_tissue	soft_tissue	Soft_Tissue:Sarcoma_Leiomyo	448.088	SARC
MDAMB175VII_BREAST	ACH-000759	MDA-MB-175-VII	metastasis	breast	NS	NS	NS	carcinoma	ductal_carcinoma	NS	NS	female		56	african_american		African_american	pleura	invasive_ductal_carcinoma	CCLE	ATCC	Adherent	RPMI+10%FBS	NA	5%DMSO		133.7	breast	breast	Breast:Carcinoma	157.887	BRCA
SUPB15_HAEMATOPOIETIC_AND_LYMPHOID_TISSUE	ACH-000059	SUP-B15	primary	haematopoietic_and_lymphoid_tissue	NS	NS	NS	lymphoid_neoplasm	acute_lymphoblastic_B_cell_leukaemia	NS	NS	male		9	caucasian		Caucasian			CCLE	NIBRI						NA	B-cell_ALL	B-cell_ALL	Leukemia:ALL	76.863	ALL
BECKER_CENTRAL_NERVOUS_SYSTEM	ACH-001016	Becker	primary	central_nervous_system	brain	NS	NS	glioma	astrocytoma_Grade_IV	glioblastoma_multiforme	NS	male		57			Caucasian			CCLE	HSRRB	Adherent			5% DMSO		67.8	glioma	glioma	CNS:Glioma_HighGrade	NA	GBM
NCIH226_LUNG	ACH-000367	NCI-H226	metastasis	lung	NS	NS	NS	carcinoma	squamous_cell_carcinoma	NS	NS	male		NA			Caucasian	pleura	lung_cancer	CCLE	ATCC		RPMI-1640+10% FBS	NA	5%DMSO		49.8	lung_NSC	lung_NSC	Lung:NSCLC_Squamous	93.3631	LUSC
NCIH1666_LUNG	ACH-000448	NCI-H1666	metastasis	lung	NS	NS	NS	carcinoma	bronchioloalveolar_adenocarcinoma	NS	NS	female		50	caucasian		Caucasian	pleura	lung_cancer	CCLE	ATCC	adherent	DMEM:F:12 (1:1) +10 %FBS	.005 mg/ml insulin, .01 mg/ml transferrin, 25nM sodium selenite, 50nM hydrocortisone, 1 ng/mL epidermal growth factor, 0.01mM ethanolamine, 0.01mM phosphorylethanolamine, 100pM triiodothyronine, 0.5%(w/v) bovine serum albumin, 0.5 mM sodium pyruvate, 2mM L-glutamine	5% DMSO		258.6	lung_NSC	lung_NSC	Lung:NSCLC_Adeno	110.736	LUAD
SW1783_CENTRAL_NERVOUS_SYSTEM	ACH-000883	SW 1783	primary	central_nervous_system	brain	NS	NS	glioma	astrocytoma_Grade_III	anaplastic	NS	male		68	caucasian		Caucasian			CCLE	NIBRI						NA	glioma	glioma	CNS:Glioma_HighGrade	273.836	LGG
ISTMES1_PLEURA	ACH-000569	IST-MES1	primary	pleura	NS	NS	NS	mesothelioma	NS	NS	NS	female		70	caucasian		Caucasian			CCLE	GNF						NA	mesothelioma	mesothelioma	Lung:Mesothelioma	114.644	MESO
NCIH1734_LUNG	ACH-000675	NCI-H1734	primary	lung	NS	NS	NS	carcinoma	adenocarcinoma	NS	NS	female		56			Caucasian			CCLE	ATCC	Adherent	RPMI-1640 +10% FBS	NA	5%DMSO		NA	lung_NSC	lung_NSC	Lung:NSCLC_Adeno	153.139	LUAD
NCIH2342_LUNG	ACH-000951	NCI-H2342	primary	lung	NS	NS	NS	carcinoma	adenocarcinoma	NS	NS	male		55	caucasian		Caucasian			CCLE	ATCC	mix	DMEM:F12(1:1) + 10%FBS	.005 mg/ml insulin, .01 mg/ml transferrin, 30nM sodium selenite, 10 nM hydrocortisone, 10 nM beta estradiol, 2 mM L-glutamine	5 % DMSO		324.8	lung_NSC	lung_NSC	Lung:NSCLC_Adeno	508.104	LUAD
EBC1_LUNG	ACH-000563	EBC-1	primary	lung	NS	NS	NS	carcinoma	squamous_cell_carcinoma	NS	NS	male		69			Asian		lung_cancer	CCLE	RIKEN	ADHERENT, EPITHIAL-LIKE	MEM+10%FBS	NA	5% DMSO		80.5	lung_NSC	lung_NSC	Lung:NSCLC_Squamous	161.359	LUSC
YMB1_BREAST	ACH-001249	YMB-1	primary	breast	NS	NS	NS	carcinoma	NS	NS	NS	female		63	caucasian		Caucasian			CCLE	NA	NA	NA	NA	NA	NA	NA	breast	breast	NA	NA	BRCA
OC316_OVARY	ACH-001145	OC 316	primary	ovary	NS	NS	NS	carcinoma	adenocarcinoma	NS	NS	female		60			Caucasian			CCLE	ICLC	Monolayer Epithelial	RPMI-1640+ 5% FBS	2mM L-Glutamine	10%DMSO		48.7	ovary	ovary	NA	NA	OV
HS936T_SKIN	ACH-000801	Hs 936.T	primary	skin	NS	NS	NS	malignant_melanoma	NS	NS	NS	male		NA			Caucasian			CCLE	GNF						NA	melanoma	melanoma	Skin:Melanoma	172.245	SKCM
T173_FIBROBLAST	ACH-000529	T1-73	primary	bone	NS	NS	NS	osteosarcoma	NS	NS	NS			NA			Caucasian			CCLE	ATCC	adherent fibroblasts	DMEM + 10% FBS	4.5 g/L glucose, 1.5 g/L sodium bicarbonate	5%DMSO		121.2	osteosarcoma	fibroblast_like	Bone:Sarcoma_Osteo	101.682	SARC
NCIH322_LUNG	ACH-000837	NCI-H322	primary	lung	NS	NS	NS	carcinoma	adenocarcinoma	NS	NS	male		52	caucasian		Caucasian		lung_cancer	CCLE	EACC	Adherent	RPMI1640+10%FBS	2mM L-Glutamine			60.7	lung_NSC	lung_NSC	Lung:NSCLC_Adeno	207.857	LUAD
HS618T_FIBROBLAST	ACH-000539	Hs 618.T	primary	lung	NS	NS	NS	carcinoma	adenocarcinoma	NS	NS	female		60	caucasian		Caucasian			CCLE	ATCC	Adherent	DMEM +10 %FBS	4.5 g/L glucose, 1.5 g/L sodium bicarbonate	5%DMSO		30	lung_NSC	fibroblast_like	Lung:NSCLC_Adeno	108.997	LUAD
HS870T_FIBROBLAST	ACH-000340	Hs 870.T	primary	bone	NS	NS	NS	osteosarcoma	NS	NS	NS			NA			Caucasian			CCLE	GNF						NA	osteosarcoma	fibroblast_like	Bone:Sarcoma_Osteo	90.6852	SARC
HS706T_BONE	ACH-000071	Hs 706.T	primary	bone	NS	NS	NS	giant_cell_tumour	NS	NS	NS	female		16	caucasian		Caucasian			CCLE	GNF						NA	giant_cell_tumour	giant_cell_tumour	NA	83.6058	NA
PANC1_PANCREAS	ACH-000164	PANC-1	primary	pancreas	NS	NS	NS	carcinoma	ductal_carcinoma	NS	NS	male		56	caucasian		Caucasian			CCLE	NIBRI						35.8	pancreas	pancreas	Pancreas:Carcinoma	90.9986	PAAD
NCIH2291_LUNG	ACH-000718	NCI-H2291	metastasis	lung	NS	NS	NS	carcinoma	adenocarcinoma	NS	NS	male		NA			Caucasian	lymph_node		CCLE	ATCC	Adherent , small pools of cells with large extracel. Space	RPMI 1640 +10% FBS	NA	5%DMSO		NA	lung_NSC	lung_NSC	Lung:NSCLC_Adeno	159.012	LUAD
T47D_BREAST	ACH-000147	T-47D	metastasis	breast	NS	NS	NS	carcinoma	ductal_carcinoma	NS	NS	female		54			Caucasian	pleura	breast_cancer	CCLE	ATCC	Adherent epithelial	RPMI-1640 + 10% FBS	0.2 Units/ml bovine insulin	5%DMSO		188.6	breast	breast	Breast:Carcinoma	89.9658	BRCA
HS742T_FIBROBLAST	ACH-000230	Hs 742.T	primary	breast	NS	NS	NS	carcinoma	NS	NS	NS	female		71	caucasian		Caucasian			CCLE	ATCC	adherent fibroblast	DMEM+10% FBS	NA	5% DMSO		NA	breast	fibroblast_like	NA	100.727	NA
BICR56_UPPER_AERODIGESTIVE_TRACT	ACH-000771	BICR 56	primary	upper_aerodigestive_tract	mouth	tongue	NS	carcinoma	squamous_cell_carcinoma	NS	NS	female		NA	caucasian		Caucasian			CCLE	ECACC	adherent epithelial	DMEM + 10% FBS	2mM GLUTAMINE+0.4UG/ML HYDROCORTISONE	5%DMSO		142.7	upper_aerodigestive	upper_aerodigestive	NA	157.191	HNSC
BICR16_UPPER_AERODIGESTIVE_TRACT	ACH-000503	BICR 16	primary	upper_aerodigestive_tract	mouth	tongue	NS	carcinoma	squamous_cell_carcinoma	NS	NS	male		NA	caucasian		Caucasian			CCLE	ECACC	ADHERENT	DMEM+10% FBS	2mM L-GLUTAMINE + 0.4UG/ML HYDROCORTISONE	5%DMSO		85.6	upper_aerodigestive	upper_aerodigestive	Upper_Aerodigestive_Tract:Carcinoma	124.742	HNSC
TE10_OESOPHAGUS	ACH-000318	TE-10	primary	oesophagus	NS	NS	NS	carcinoma	squamous_cell_carcinoma	NS	NS			NA			Asian			CCLE	RIKEN	epithelial-like	RPMI 1640 +10%FBS	NA		NA	NA	esophagus	esophagus	Oesophagus:Carcinoma	126.176	ESCA
SKMEL28_SKIN	ACH-000615	SK-MEL-28	primary	skin	NS	NS	NS	malignant_melanoma	NS	NS	NS	male		51			Caucasian		skin_cancer	CCLE	NIBRI						NA	melanoma	melanoma	Skin:Melanoma	124.589	SKCM
BICR6_UPPER_AERODIGESTIVE_TRACT	ACH-000415	BICR 6	primary	upper_aerodigestive_tract	pharynx	NS	NS	carcinoma	squamous_cell_carcinoma	NS	NS	male		NA	caucasian		Caucasian			CCLE	ECACC	Adherent keratinocyte	DMEM+10%FBS	2mM L-Glutamine ; 0.4 ug/ml Hydrocortisone	5% DMSO		119.4	upper_aerodigestive	upper_aerodigestive	Upper_Aerodigestive_Tract:Carcinoma	108.921	HNSC
BHY_UPPER_AERODIGESTIVE_TRACT	ACH-000548	BHY	primary	upper_aerodigestive_tract	head_neck	NS	NS	carcinoma	squamous_cell_carcinoma	NS	NS	male		52	asian		Asian			CCLE	DSMZ	epithelial- like polygonal or round and flat cells (sometimes spindle- form, very heterogenous) growing in monolayers	DMEM + 10% FBS	N/A	10%DMSO	~ 70 hrs	67.6	upper_aerodigestive	upper_aerodigestive	Upper_Aerodigestive_Tract:Carcinoma	158.748	HNSC
AZ521_SMALL_INTESTINE	ACH-001015	AZ-521	metastasis	stomach	NS	NS	NS	carcinoma	NS	NS	NS			NA	asian	japan	African_american	NS		CCLE	NA	NA	NA	NA	NA	NA	NA	stomach	other	NA	NA	NA
SH4_SKIN	ACH-000441	SH-4	metastasis	skin	NS	NS	NS	malignant_melanoma	NS	NS	NS	female		60	caucasian		Caucasian	pleura		CCLE	ATCC	mixture of spindle-shaped and epithelial-like cells	DMEM+10% FBS	NA	5%DMSO		68.9	melanoma	melanoma	Skin:Melanoma	109.541	SKCM
KPL1_BREAST	ACH-000028	KPL-1	metastasis	breast	NS	NS	NS	carcinoma	ductal_carcinoma	NS	NS	female		50	asian	japan	Caucasian	pleura	breast_cancer	CCLE	DSMZ	adherent growing in monolayers(very dense colonies)	90% Dulbecco's MEM + 10% h.i. FBS	NA		~ 50 hrs	NA	breast	breast	Breast:Carcinoma	117.755	BRCA
CGTHW1_THYROID	ACH-001023	CGTH-W-1	metastasis	thyroid	NS	NS	NS	carcinoma	follicular_carcinoma	NS	NS	female		70	asian	chinese	Caucasian	sternum		CCLE	DSMZ	Adherent large epitheloid cells with long processes growing in monolayers with multilayer foci	RPMI1640+10%FBS	NA	10%DMSO	20-25hrs	31.6	thyroid	thyroid	Thyroid:Carcinoma	NA	THCA
TUHR4TKB_KIDNEY	ACH-000495	TUHR4TKB	primary	kidney	NS	NS	NS	carcinoma	NS	NS	NS			NA			Asian			CCLE	RIKEN	adherent	DMEM+10% FBS	NA	5% DMSO		88.4	kidney	kidney	Kidney:Carcinoma	119.399	KIRC
LS123_LARGE_INTESTINE	ACH-000501	LS123	primary	large_intestine	colon	NS	NS	carcinoma	adenocarcinoma	NS	NS	female		65	caucasian		Caucasian			CCLE			EMEM+10%FBS	NA	5%DMSO		NA	colorectal	colorectal	Colorectal:Carcinoma	110.627	COAD/READ
HEL_HAEMATOPOIETIC_AND_LYMPHOID_TISSUE	ACH-000004	HEL	primary	haematopoietic_and_lymphoid_tissue	NS	NS	NS	haematopoietic_neoplasm	acute_myeloid_leukaemia	M6	NS	male		30			Caucasian			CCLE	DSMZ	Round cells to occasionally polynucleated, single cells in suspension, few adherent	RPMI1640+10%FBS	NA	10%DMSO	36 hrs	38.4	AML	AML	Leukemia:AML	98.1854	LAML
HPAC_PANCREAS	ACH-000270	HPAC	primary	pancreas	NS	NS	NS	carcinoma	ductal_carcinoma	NS	NS	female		64	caucasian		Caucasian		Pancreatic Cancer	CCLE	ATCC	ADHERENT EPITHELIAL;	DMEM:F12 + 5% FBS	Insulin + EGF	5%DMSO		69.7	pancreas	pancreas	Pancreas:Carcinoma	98.3443	PAAD
RCC10RGB_KIDNEY	ACH-000189	RCC10RGB	primary	kidney	NS	NS	NS	carcinoma	renal_cell_carcinoma	NS	NS	male		NA	asian		Asian			CCLE	RIKEN	ADHERENT; EPITHELIAL-LIKE	DMEM+10% FBS	NA	5%DMSO		122.9	kidney	kidney	Kidney:Carcinoma	130.936	KIRC
JHOM1_OVARY	ACH-000237	JHOM-1	primary	ovary	NS	NS	NS	carcinoma	adenocarcinoma	NS	NS	female		NA			Asian			CCLE	RIKEN	ADHERENT; EPITHELIAL-LIKE	DMEM:F12+10% FBS	0.1mM NEAA	5%DMSO		60	ovary	ovary	Ovary:Carcinoma	102.747	OV
SU8686_PANCREAS	ACH-000114	SU.86.86	primary	pancreas	NS	NS	NS	carcinoma	ductal_carcinoma	NS	NS	female		57	caucasian		Caucasian			CCLE	NIBRI		RPMI-1640+10% FBS	NA	5% DMSO		62.1	pancreas	pancreas	Pancreas:Carcinoma	82.2298	PAAD
HCC33_LUNG	ACH-000515	HCC-33	metastasis	lung	NS	NS	NS	carcinoma	small_cell_carcinoma	NS	NS	male		52	caucasian		Caucasian	pleura	lung_cancer	CCLE	DSMZ	ROUND TO OVOID CELLS GROWING SINGLY OR IN CLUMPS	RPMI-1640+20% FBS	NA	5% DMSO	40 hrs	93.7	lung_small_cell	lung_small_cell	Lung:SCLC	126.746	SCLC
TE6_OESOPHAGUS	ACH-000605	TE-6	primary	oesophagus	NS	NS	NS	carcinoma	squamous_cell_carcinoma	NS	NS			NA			Asian			CCLE	RIKEN	epithelial-like	RPMI 1640 +10%FBS	NA		NA	NA	esophagus	esophagus	Oesophagus:Carcinoma	151.565	ESCA
JHOC5_OVARY	ACH-000324	JHOC-5	primary	ovary	NS	NS	NS	carcinoma	clear_cell_carcinoma	NS	NS	female		NA			Asian			CCLE	RIKEN	epithelial-like	(DMEM: HamF12=1:1) +10%FBS	0.1mM NEAA		NA	NA	ovary	ovary	Ovary:Carcinoma	155.15	OV
ACCMESO1_PLEURA	ACH-000086	ACC-MESO-1	metastasis	pleura	NS	NS	NS	mesothelioma	NS	NS	NS			NA			Asian	pleura		CCLE	RIKEN	fibroblast-like	RPMI 1640 +10% FBS	NA		NA	NA	mesothelioma	mesothelioma	Lung:Mesothelioma	112.021	MESO
BL41_HAEMATOPOIETIC_AND_LYMPHOID_TISSUE	ACH-000245	BL-41	primary	haematopoietic_and_lymphoid_tissue	NS	NS	NS	lymphoid_neoplasm	Burkitt_lymphoma	NS	NS	male		8	caucasian		Caucasian			CCLE	DSMZ	Adherent	RPMI + 10 % FBS	NA	5%DMSO		25.5	lymphoma_Burkitt	lymphoma_Burkitt	Lymphoma:NH_B_cell	84.5961	DLBC
SNU1214_UPPER_AERODIGESTIVE_TRACT	ACH-000715	SNU-1214	primary	upper_aerodigestive_tract	larynx	glottis	NS	carcinoma	squamous_cell_carcinoma	NS	NS	male		55	asian		Asian			CCLE	KCLB	epithelial; monolayer	RPMI 1640 with L-glutamine (300mg/L), 90%; heat inactivated fetal bovine serum (FBS),10%	25mM Hepes and 25mM NaHCo3		96 hrs	NA	upper_aerodigestive	upper_aerodigestive	Upper_Aerodigestive_Tract:Carcinoma	193.953	HNSC
CORL105_LUNG	ACH-000161	COR-L105	primary	lung	NS	NS	NS	carcinoma	adenocarcinoma	NS	NS	male		NA	caucasian		Caucasian			CCLE	GNF						NA	lung_NSC	lung_NSC	Lung:NSCLC_Adeno	86.5245	LUAD
LMSU_STOMACH	ACH-000255	LMSU	metastasis	stomach	NS	NS	NS	carcinoma	adenocarcinoma	NS	NS			NA			Asian	lymph_node		CCLE	RIKEN	epithelial-like	HamF10 +10% FBS	NA		NA	NA	stomach	stomach	Gastric:Carcinoma	127.491	STAD
SNU1197_LARGE_INTESTINE	ACH-000412	SNU-1197	primary	large_intestine	colon	NS	NS	carcinoma	NS	NS	NS	male		70	asian		Asian			CCLE	KCLB	epithelial; monolayer	RPMI 1640 with glutamine(300mg/L), 90%,heat inactivated fetal bovine serum (FBS)10%	25mM Hepes and 25mM NaHCo3		60 hrs	NA	colorectal	colorectal	Colorectal:Carcinoma	150.272	COAD/READ
COLO668_LUNG	ACH-000803	COLO 668	metastasis	lung	NS	NS	NS	carcinoma	small_cell_carcinoma	NS	NS	female		47			Caucasian	brain		CCLE	ECACC						NA	lung_small_cell	lung_small_cell	Lung:SCLC	185.273	SCLC
OSRC2_KIDNEY	ACH-000159	OS-RC-2	primary	kidney	NS	NS	NS	carcinoma	renal_cell_carcinoma	NS	NS	male		NA			Asian			CCLE	RIKEN	epithelial-like	RPMI 1640 +10% FBS	NA		NA	NA	kidney	kidney	Kidney:Carcinoma	96.7178	KIRC
HUH6_LIVER	ACH-000671	HuH-6	primary	liver	NS	NS	NS	other	hepatoblastoma	NS	NS	male	pediatric	NA	asian	japan	Asian			CCLE	RIKEN	epithelial-like	DMEM + 10%FBS	NA		NA	NA	liver	liver	Liver:Hepatoblastoma	174.019	LIHC
PANC0203_PANCREAS	ACH-000042	Panc 02.03	primary	pancreas	NS	NS	NS	carcinoma	NS	NS	NS	female		70	caucasian		Caucasian			CCLE	ATCC	adherent	RPMI + 10% FBS	NA	5% DMSO		102.2	pancreas	pancreas	Pancreas:Carcinoma	65.5932	PAAD
CJM_SKIN	ACH-000458	CJM	metastasis	skin	NS	NS	NS	malignant_melanoma	NS	NS	NS			NA			Asian	NS		CCLE	RIKEN	epithelial-like	HamF10 +10% FBS	NA		NA	NA	melanoma	melanoma	Skin:Melanoma	148.442	SKCM
BICR22_UPPER_AERODIGESTIVE_TRACT	ACH-000794	BICR 22	metastasis	upper_aerodigestive_tract	mouth	tongue	NS	carcinoma	squamous_cell_carcinoma	NS	NS	male		NA	caucasian		Caucasian			CCLE	ECACC	adherent; epithelial, keratinocyte	DMEM+20% FBS	2mM L-glutamine, 0.4ug/ml hydrocortisone	5%DMSO		66	upper_aerodigestive	upper_aerodigestive	Upper_Aerodigestive_Tract:Carcinoma	178.585	HNSC
SHSY5Y_AUTONOMIC_GANGLIA	ACH-001188	SH-SY5Y	metastasis	autonomic_ganglia	NS	NS	NS	neuroblastoma	NS	NS	NS	female		4			NA	bone_marrow		CCLE	ATCC		DMEM:F12 +10% FBS	NA	5%DMSO		88.1	neuroblastoma	neuroblastoma	NA	NA	NB
TM31_CENTRAL_NERVOUS_SYSTEM	ACH-000592	TM-31	primary	central_nervous_system	brain	NS	NS	glioma	astrocytoma	NS	NS			NA			Asian			CCLE	RIKEN	fibroblast-like	MEM +10%FBS	NA		NA	NA	glioma	glioma	CNS:Glioma	173.451	NA
SNU1272_KIDNEY	ACH-000513	SNU-1272	primary	kidney	NS	NS	NS	carcinoma	clear_cell_renal_cell_carcinoma	NS	NS	female		63	asian		Asian			CCLE	KCLB	epithelial; monolayer	RPMI 1640 with L-glutamine (300mg/L), 90%; heat inactivated fetal bovine serum (FBS),10%	25mM Hepes and 25mM NaHCo3		153 hrs	NA	kidney	kidney	Kidney:Carcinoma	162.698	KIRC
KPNRTBM1_AUTONOMIC_GANGLIA	ACH-000345	KP-N-RT-BM-1	metastasis	autonomic_ganglia	NS	NS	NS	neuroblastoma	NS	NS	NS			NA			Asian	bone_marrow	neuroblastoma	CCLE	HSSRB	neuroblast-like	RPMI 1640 medium with 10% fetal bovine serum	NA		NA	404.8	neuroblastoma	neuroblastoma	PNET:Neuroblastoma	121.755	NB
BICR18_UPPER_AERODIGESTIVE_TRACT	ACH-000992	BICR 18	primary	upper_aerodigestive_tract	larynx	NS	NS	carcinoma	squamous_cell_carcinoma	NS	NS	male		NA			Caucasian			CCLE	ECACC						NA	upper_aerodigestive	upper_aerodigestive	Upper_Aerodigestive_Tract:Carcinoma	212.389	HNSC
TE4_OESOPHAGUS	ACH-000917	TE-4	primary	oesophagus	NS	NS	NS	carcinoma	squamous_cell_carcinoma	NS	NS			NA			Asian			CCLE	RIKEN	epithelial-like	RPMI 1640 +10%FBS	NA		NA	NA	esophagus	esophagus	Oesophagus:Carcinoma	398.151	ESCA
PCM6_HAEMATOPOIETIC_AND_LYMPHOID_TISSUE	ACH-001162	PCM6	primary	haematopoietic_and_lymphoid_tissue	NS	NS	NS	lymphoid_neoplasm	plasma_cell_myeloma	NS	NS			NA			Asian			CCLE	Riken	Suspension; plamacyte-like	McCoy's 5A +20% FBS	NA	5%DMSO		NA	multiple_myeloma	multiple_myeloma	Lymphoma:Multiple_Myeloma	NA	MM
ECC10_STOMACH	ACH-000560	ECC10	metastasis	stomach	NS	NS	NS	carcinoma	small_cell_adenocarcinoma	NS	NS			NA			Asian	liver		CCLE	RIKEN	other	RPMI 1640 +10%FBS	NA		NA	NA	stomach	stomach	Gastric:Carcinoma	158.839	STAD
TUHR14TKB_KIDNEY	ACH-000317	TUHR14TKB	primary	kidney	NS	NS	NS	carcinoma	NS	NS	NS			NA			Asian			CCLE	RIKEN	ADHERENT; EPITHELIAL-LIKE	RPMI-1640+10%FBS	NA	5%DMSO		160.3	kidney	kidney	Kidney:Carcinoma	125.665	KIRC
YD15_SALIVARY_GLAND	ACH-000836	YD-15	primary	salivary_gland	tongue	NS	NS	carcinoma	mucoepidermoid_carcinoma	NS	NS	male		39	asian		Asian			CCLE	KCLB	epithelial; monolayer	RPMI 1640 with L-glutamine (300mg/L), 90%; heat inactivated fetal bovine serum (FBS),10%	25mM Hepes and 25mM NaHCo3		19.8 hrs	NA	other	upper_aerodigestive	Salivary_Gland:Carcinoma	195.993	HNSC
UBLC1_URINARY_TRACT	ACH-000741	U-BLC1	primary	urinary_tract	bladder	NS	NS	carcinoma	transitional_cell_carcinoma	NS	NS	female		NA			African_american			CCLE	ECACC	Adherent	2/3 DMEM:1/3 RPMI+10%FBS	2mM GLUTAMINE	5% DMSO		221.1	urinary_tract	urinary_tract	Bladder:Carcinoma	142.379	BLCA
ECGI10_OESOPHAGUS	ACH-000305	EC-GI-10	primary	oesophagus	NS	NS	NS	carcinoma	NS	NS	NS	male		65			Asian			CCLE	RIKEN	epithelial-like	HamF12+10%FBS	NA		NA	NA	esophagus	esophagus	Oesophagus:Carcinoma	120.379	ESCA
CW2_LARGE_INTESTINE	ACH-000998	CW-2	primary	large_intestine	colon	NS	NS	carcinoma	NS	NS	NS	female		55			Asian			CCLE	RIKEN	epithelial-like	RPMI 1640(or DM-160AU) +10%FBS	NA		NA	NA	colorectal	colorectal	Colorectal:Carcinoma	2211.99	COAD/READ
SNU761_LIVER	ACH-000537	SNU-761	primary	liver	NS	NS	NS	carcinoma	hepatocellular_carcinoma	NS	NS	male		49	asian		Asian			CCLE	KCLB	polygonal; monolayer	RPMI 1640 with L-glutamine (300mg/L), 90%; heat inactivated fetal bovine serum (FBS),10%	25mM Hepes and 25mM NaHCo3		24 hrs	NA	liver	liver	Liver:HCC	174.466	LIHC
SNU61_LARGE_INTESTINE	ACH-000532	SNU-61	primary	large_intestine	colon	NS	NS	carcinoma	NS	NS	NS	male		48	asian		Asian			CCLE	KCLB	epithelial; monolayer	RPMI 1640 with L-glutamine (300mg/L), 90%; heat inactivated fetal bovine serum (FBS),10%	25mM Hepes and 25mM NaHCo3		39 hrs	NA	colorectal	colorectal	Colorectal:Carcinoma	150.487	COAD/READ
NCIH1915_LUNG	ACH-000434	NCI-H1915	metastasis	lung	NS	NS	NS	carcinoma	large_cell_carcinoma	NS	NS	female		61	caucasian		Caucasian	brain		CCLE	ATCC	adherent	RPMI 1640 +10% FBS	NA	5%DMSO		96.8	lung_NSC	lung_NSC	Lung:NSCLC_Large_Cell	109.125	NA
SNU324_PANCREAS	ACH-000933	SNU-324	primary	pancreas	NS	NS	NS	carcinoma	NS	NS	NS	male		50	asian		Asian			CCLE	KCLB	epithelial;monolayer and floating	RPMI 1640 with L-glutamine (300mg/L), 90%; heat inactivated fetal bovine serum (FBS),10%	25mM Hepes and 25mM NaHCo3		52 hrs	NA	pancreas	pancreas	Pancreas:Carcinoma	451.494	PAAD
YD10B_UPPER_AERODIGESTIVE_TRACT	ACH-000723	YD-10B	primary	upper_aerodigestive_tract	mouth	tongue	NS	carcinoma	squamous_cell_carcinoma	NS	NS	male		67	asian		Asian			CCLE	KCLB	epithelial; monolayer	RPMI 1640 with L-glutamine (300mg/L), 90%; heat inactivated fetal bovine serum (FBS),10%	25mM Hepes and 25mM NaHCo3		25.3 hrs	NA	upper_aerodigestive	upper_aerodigestive	Upper_Aerodigestive_Tract:Carcinoma	175.584	HNSC
HCC2279_LUNG	ACH-000731	HCC-2279	primary	lung	NS	NS	NS	carcinoma	adenocarcinoma	NS	NS	female		52	asian		Asian		lung_cancer	CCLE	KCLB	epithelial; monolayer	RPMI 1640 with L-glutamine (300mg/L), 90%; heat inactivated fetal bovine serum (FBs),10%	25mM Hepes and 25mM NaHCo3		NA	NA	lung_NSC	lung_NSC	Lung:NSCLC_Adeno	189.526	LUAD
HLC1_LUNG	ACH-001088	HLC-1	primary	lung	NS	NS	NS	carcinoma	adenocarcinoma	NS	NS			NA			Asian			CCLE	NA	NA	NA	NA	NA	NA	NA	lung_NSC	lung_NSC	NA	NA	NA
TUHR10TKB_KIDNEY	ACH-000459	TUHR10TKB	primary	kidney	NS	NS	NS	carcinoma	NS	NS	NS			NA			Asian			CCLE	RIKEN	epithelial-like	RPMI 1640 +10%FBS	NA		NA	NA	kidney	kidney	Kidney:Carcinoma	168.61	KIRC
HEC1B_ENDOMETRIUM	ACH-000941	HEC-1-B	primary	endometrium	NS	NS	NS	carcinoma	adenocarcinoma	NS	NS	female		71			Asian			CCLE	NIBRI						NA	endometrium	endometrium	Endometrium:Carcinoma	863.798	UCEC
VMRCLCP_LUNG	ACH-001234	VMRC-LCP	primary	lung	NS	NS	NS	carcinoma	squamous_cell_carcinoma	NS	NS			NA			Caucasian			CCLE	HSRRB	mixed cells	EMEM+10% FBS	NEAA	5% DMSO		NA	lung_NSC	lung_NSC	NA	NA	NA
TGBC11TKB_STOMACH	ACH-000949	TGBC11TKB	metastasis	stomach	NS	NS	NS	carcinoma	NS	NS	NS	female		NA			Asian	lymph_node		CCLE	RIKEN	epithelial-like	DMEM +5%FBS	NA		NA	NA	stomach	stomach	Gastric:Carcinoma	506.604	STAD
OVK18_OVARY	ACH-000947	OVK18	primary	ovary	NS	NS	NS	carcinoma	endometrioid_carcinoma	NS	NS	female		NA			Asian			CCLE	Riken	Adherent	MEM+10% FBS	NA	5% DMSO		49.7	ovary	ovary	Ovary:Carcinoma	545.553	OV
SNU1077_ENDOMETRIUM	ACH-000302	SNU-1077	primary	endometrium	NS	NS	NS	carcinoma	carcinosarcoma-malignant_mesodermal_mixed_tumour	NS	NS	female		60	asian		Asian			CCLE	KCLB	polypoid; monolayer	RPMI 1640 with L-glutamine (300mg/L), 90%; heat inactivated fetal bovine serum (FBS),10%	25mM Hepes and 25mM NaHCo3		43 hrs	NA	endometrium	endometrium	Endometrium:Others	115.666	UCEC
HCC1588_LUNG	ACH-001078	HCC-1588	primary	lung	NS	NS	NS	carcinoma	squamous_cell_carcinoma	NS	NS	female		63			Caucasian			CCLE	KCLB	epithelial; monolayer	RPMI 1640 with L-glutamine (300mg/L), 90%; heat inactivated fetal bovine serum (FBS),10%	25mM Hepes and 25mM NaHCo3		NA	NA	lung_NSC	lung_NSC	Colorectal:Carcinoma	147.672	COAD/READ
SNU213_PANCREAS	ACH-000266	SNU-213	primary	pancreas	NS	NS	NS	carcinoma	NS	NS	NS	male		65	asian		Asian			CCLE	KCLB	epithelial; monolayer	RPMI 1640 with L-glutamine (300mg/L), 90%; heat inactivated fetal bovine serum (FBS),10%	25mM Hepes and 25mM NaHCo3		48 hrs	NA	pancreas	pancreas	Pancreas:Carcinoma	112.573	PAAD
HT115_LARGE_INTESTINE	ACH-000986	HT115	primary	large_intestine	colon	NS	NS	carcinoma	NS	NS	NS			NA			Caucasian			CCLE	ECACC	Epithelial adherent	DMEM+15%FBS	2Mm L-Glutamine	?		90.6	colorectal	colorectal	Colorectal:Carcinoma	1262.32	COAD/READ
TE14_OESOPHAGUS	ACH-000726	TE-14	primary	oesophagus	NS	NS	NS	carcinoma	squamous_cell_carcinoma	NS	NS			NA			Asian			CCLE	RIKEN	epithelial-like	RPMI 1640 +10%FBS	NA		NA	NA	esophagus	esophagus	Oesophagus:Carcinoma	186.243	ESCA
TE8_OESOPHAGUS	ACH-000452	TE-8	primary	oesophagus	NS	NS	NS	carcinoma	squamous_cell_carcinoma	NS	NS			NA			Asian			CCLE	RIKEN	epithelial-like	RPMI 1640 +10%FBS	NA		NA	NA	esophagus	esophagus	Oesophagus:Carcinoma	120.179	ESCA
SNU520_STOMACH	ACH-000908	SNU-520	primary	stomach	NS	NS	NS	carcinoma	NS	NS	NS	female		60	asian	korea	Asian			CCLE	KCLB	floating aggregates; suspention	RPMI 1640 with L-glutamine (300mg/L), 90%; heat inactivated fetal bovine serum (FBS),10%	25mM Hepes and 25mM NaHCo3		NA	NA	stomach	stomach	Gastric:Carcinoma	354.177	STAD
JHUEM3_ENDOMETRIUM	ACH-000173	JHUEM-3	primary	endometrium	NS	NS	NS	carcinoma	adenocarcinoma	NS	NS			NA			Asian			CCLE	RIKEN	epithelial-like	(DMEM:HamF12=1:1) +10%FBS	0.1mMNEAA		NA	NA	endometrium	endometrium	Endometrium:Carcinoma	123.77	UCEC
LI7_LIVER	ACH-000471	Li-7	primary	liver	NS	NS	NS	carcinoma	hepatocellular_carcinoma	NS	NS			NA			Asian			CCLE	RIKEN	epithelial-like	RPMI 1640 +10%FBS	NA		NA	NA	liver	liver	Liver:HCC	139.152	LIHC
NCIH838_LUNG	ACH-000416	NCI-H838	metastasis	lung	NS	NS	NS	carcinoma	non_small_cell_carcinoma	NS	NS	male		59	caucasian		Caucasian	lymph_node		CCLE	ATCC	Adherent	RPMI+10%FBS	NA	5% DMSO		42.9	lung_NSC	lung_NSC	Lung:NSCLC_Adeno	111.316	LUAD
SNU119_OVARY	ACH-000635	SNU-119	primary	ovary	NS	NS	NS	carcinoma	adenocarcinoma	NS	NS	female		50	asian		Asian			CCLE	KCLB	epithelial; monolayer	RPMI 1640 with L-glutamine (300mg/L), 90%; heat inactivated fetal bovine serum (FBS),10%	25mM Hepes and 25mM NaHCo3		53 hrs	NA	ovary	ovary	Ovary:Carcinoma	171.736	OV
SNU1033_LARGE_INTESTINE	ACH-000286	SNU-1033	primary	large_intestine	colon	NS	NS	carcinoma	NS	NS	NS	female		45	asian		Asian			CCLE	KCLB	epithelial; monolayer	RPMI 1640 with L-glutamine (300mg/L), 90%; heat inactivated fetal bovine serum (FBS),10%	25mM Hepes and 25mM NaHCo3		42 hrs	NA	colorectal	colorectal	Colorectal:Carcinoma	131.146	COAD/READ
SNUC5_LARGE_INTESTINE	ACH-000970	SNU-C5	primary	large_intestine	colon	NS	NS	carcinoma	adenocarcinoma	NS	NS	female		77	asian		Asian			CCLE	KCLB	epithelial; monolayer	RPMI 1640 with L-glutamine (300mg/L), 90%; heat inactivated fetal bovine serum (FBS),10%	25mM Hepes and 25mM NaHCo3		67 hrs	NA	colorectal	colorectal	Colorectal:Carcinoma	802.444	COAD/READ
GSS_STOMACH	ACH-000746	GSS	metastasis	stomach	NS	NS	NS	carcinoma	adenocarcinoma	NS	NS			NA			Asian	liver		CCLE	RIKEN	other	RPMI 1640 +10%FBS	NA		NA	NA	stomach	stomach	Gastric:Carcinoma	191.987	STAD
TALL1_HAEMATOPOIETIC_AND_LYMPHOID_TISSUE	ACH-000197	TALL-1	primary	haematopoietic_and_lymphoid_tissue	NS	NS	NS	lymphoid_neoplasm	acute_lymphoblastic_T_cell_leukaemia	NS	NS	male		28			NA			CCLE	NIBRI						83.1	T-cell_ALL	T-cell_ALL	Leukemia:ALL	139.217	ALL
HCC1171_LUNG	ACH-000578	HCC-1171	primary	lung	NS	NS	NS	carcinoma	non_small_cell_carcinoma	NS	NS	male		58	caucasian		Caucasian		lung_cancer	CCLE	KCLB	epithelial; monolayer	RPMI 1640 with L-glutamine (300mg/L), 90%; heat inactivated fetal bovine serum (FBS),10%	25mM Hepes and 25mM NaHCo3		NA	NA	lung_NSC	lung_NSC	Lung:NSCLC_Others	125.158	NA
SNUC4_LARGE_INTESTINE	ACH-000959	SNU-C4	primary	large_intestine	colon	NS	NS	carcinoma	adenocarcinoma	NS	NS	male		35	asian		Asian			CCLE	KCLB	epithelial; monolayer	RPMI 1640 with L-glutamine (300mg/L), 90%; heat inactivated fetal bovine serum (FBS),10%	25mM Hepes and 25mM NaHCo3		27 hrs	NA	colorectal	colorectal	Colorectal:Carcinoma	583.56	COAD/READ
U138MG_CENTRAL_NERVOUS_SYSTEM	ACH-001214	U-138 MG	primary	central_nervous_system	brain	NS	NS	glioma	astrocytoma	NS	NS	null		50	caucasian		NA		brain_cancer	CCLE	NA	NA	NA	NA	NA	NA	NA	glioma	glioma	NA	NA	NA
SNU620_STOMACH	ACH-000325	SNU-620	metastasis	stomach	NS	NS	NS	carcinoma	NS	NS	NS	female		59	asian	korea	Asian	ascites		CCLE	KCLB	scatlered floating; suspention	RPMI 1640 with L-glutamine (300mg/L), 90%; heat inactivated fetal bovine serum (FBS),10%	25mM Hepes and 25mM NaHCo3		NA	NA	stomach	stomach	Gastric:Carcinoma	134.995	STAD
ECC12_STOMACH	ACH-000225	ECC12	metastasis	stomach	NS	NS	NS	carcinoma	small_cell_adenocarcinoma	NS	NS	male		63			Asian	NS		CCLE	Riken	Adherent	RPMI-1640+10% FBS	NA	5% DMSO		95.9	stomach	stomach	Gastric:Carcinoma	113.583	STAD
GSU_STOMACH	ACH-000485	GSU	metastasis	stomach	NS	NS	NS	carcinoma	adenocarcinoma	NS	NS			NA			Asian	ascites		CCLE	RIKEN	other	RPMI 1640 +10%FBS	NA		NA	NA	stomach	stomach	Gastric:Carcinoma	179.886	STAD
KMS18_HAEMATOPOIETIC_AND_LYMPHOID_TISSUE	ACH-000658	KMS-18	primary	haematopoietic_and_lymphoid_tissue	NS	NS	NS	lymphoid_neoplasm	plasma_cell_myeloma	NS	NS			NA			Asian		multiple_myeloma	CCLE	NIBRI						NA	multiple_myeloma	multiple_myeloma	NA	NA	MM
JHOM2B_OVARY	ACH-000333	JHOM-2B	primary	ovary	NS	NS	NS	carcinoma	adenocarcinoma	NS	NS	female		NA			Asian			CCLE	RIKEN	epithelial-like	(DMEM:HamF12=1:1) + 10%FBS	0.1mMNEAA		NA	NA	ovary	ovary	Ovary:Carcinoma	142.741	OV
MDAMB231_BREAST	ACH-000768	MDA-MB-231	metastasis	breast	NS	NS	NS	carcinoma	NS	NS	NS	female		51	caucasian		Caucasian	pleura	breast_cancer	CCLE	ATCC	Adherent	RPMI-1640 + 10% FBS	NA	5%DMSO		67.9	breast	breast	Breast:Carcinoma	166.146	BRCA
OV90_OVARY	ACH-000291	OV-90	metastasis	ovary	NS	NS	NS	carcinoma	mixed_carcinoma	NS	NS	female		64	caucasian	canada	Caucasian	ascites	malignant_papillary_serous_adenocarcinoma	CCLE	NIBRI	Epithelial Adherent	MCDB 105 (1:1)Medium 199 +15%FBS	NA	5%DMSO		91.2	ovary	ovary	Ovary:Carcinoma	93.7142	OV
RS411_HAEMATOPOIETIC_AND_LYMPHOID_TISSUE	ACH-000874	RS4;11	primary	haematopoietic_and_lymphoid_tissue	NS	NS	NS	lymphoid_neoplasm	acute_lymphoblastic_B_cell_leukaemia	NS	NS	female		32	caucasian		Caucasian			CCLE	ATCC	Suspension	RPMI-1640+10% FBS	NA	5%DMSO		181.7	B-cell_ALL	B-cell_ALL	Leukemia:ALL	266.625	ALL
OVTOKO_OVARY	ACH-000663	OVTOKO	metastasis	ovary	NS	NS	NS	carcinoma	clear_cell_carcinoma	NS	NS	female		78	asian	japan	Asian	spleen	Ovarian Cancer	CCLE	HSSRB	Adherent	RPMI-1640+10%FBS	NA	5% DMSO		46.4	ovary	ovary	Ovary:Carcinoma	178.292	OV
OVCAR4_OVARY	ACH-000617	OVCAR-4	primary	ovary	NS	NS	NS	carcinoma	NS	NS	NS	female		42			Caucasian		ovarian_cancer	CCLE	NIBRI						NA	ovary	ovary	Ovary:Carcinoma	151.244	OV
HLF_LIVER	ACH-000393	HLF	primary	liver	NS	NS	NS	carcinoma	hepatocellular_carcinoma	NS	NS	male		69	asian	japan	Asian			CCLE	HSRRB	ADHERENT	DMEM+5% FBS	NA	5% DMSO		58.2	liver	liver	Liver:HCC	141.71	LIHC
HCT15_LARGE_INTESTINE	ACH-000997	HCT-15	primary	large_intestine	colon	NS	NS	carcinoma	adenocarcinoma	NS	NS	male		NA			Caucasian		colon_cancer	CCLE	NIBRI						36.2	colorectal	colorectal	Colorectal:Carcinoma	2069.98	COAD/READ
SW1463_LARGE_INTESTINE	ACH-000470	SW1463	primary	large_intestine	rectum	NS	NS	carcinoma	adenocarcinoma	NS	NS	female		66	caucasian		Caucasian			CCLE	ATCC	ADHERENT EPITHELIAL;	RPMI-1640+10% FBS	NA	5%DMSO		70.3	colorectal	colorectal	Colorectal:Carcinoma	90.6171	COAD/READ
SF295_CENTRAL_NERVOUS_SYSTEM	ACH-000376	SF-295	primary	central_nervous_system	brain	NS	NS	glioma	astrocytoma_Grade_IV	glioblastoma_multiforme	NS	female		67			Caucasian		brain_cancer	CCLE	GNF						NA	glioma	glioma	CNS:Glioma_HighGrade	99.5188	GBM
WM115_SKIN	ACH-000304	WM-115	primary	skin	NS	NS	NS	malignant_melanoma	NS	NS	NS	female		59			Caucasian			CCLE							105.1	melanoma	melanoma	Skin:Melanoma	135.062	SKCM
JHH4_LIVER	ACH-000476	JHH-4	primary	liver	NS	NS	NS	carcinoma	hepatocellular_carcinoma	NS	NS	male		51	asian	japan	Asian			CCLE	HSRRB	Epithelial-like	EMEM +10 % FBS	NA			85.2	liver	liver	Liver:HCC	148.739	LIHC
OE33_OESOPHAGUS	ACH-000383	OE33	primary	oesophagus	lower_third	NS	NS	other	metaplasia	NS	NS	female		73	caucasian		Caucasian			CCLE	HPACC	EPITHELIAL, ADHERENT	RPMI-1640+10% FBS	2mM l-GLUTAMINE	5%DMSO		61.3	esophagus	esophagus	Oesophagus:Benign	99.5569	ESCA
CCK81_LARGE_INTESTINE	ACH-000963	CCK-81	primary	large_intestine	colon	NS	NS	carcinoma	adenocarcinoma	NS	NS			NA			Asian		Colon Cancer	CCLE			EMEM+10% FBS	NA	5% DMSO	43hrs	266.5	colorectal	colorectal	Colorectal:Carcinoma	689.393	COAD/READ
JHH1_LIVER	ACH-000620	JHH-1	primary	liver	NS	NS	NS	carcinoma	hepatocellular_carcinoma	NS	NS	male		50	asian	japan	Asian			CCLE	HSRRB	Epithelial-like	Williams E Medium + 10%FBS	NA			130	liver	liver	Liver:HCC	184.93	LIHC
SJSA1_BONE	ACH-000748	SJSA-1	primary	bone	femur	NS	NS	osteosarcoma	NS	NS	NS	male		19	african_american		African_american			CCLE	ATCC	Fibroblast like adherent	RPMI1640+10%FBS	NA	5%DMSO		98.2	osteosarcoma	osteosarcoma	Bone:Sarcoma_Osteo	160.423	SARC
NCIH2228_LUNG	ACH-000447	NCI-H2228	primary	lung	NS	NS	NS	carcinoma	adenocarcinoma	NS	NS	female		NA			Caucasian			CCLE		AHDHERENT; `	RPMI-1640+10%FBS	NA	5%DMSO		88.8	lung_NSC	lung_NSC	Lung:NSCLC_Adeno	108.307	LUAD
RERFLCAI_LUNG	ACH-000261	RERF-LC-AI	primary	lung	NS	NS	NS	carcinoma	squamous_cell_carcinoma	NS	NS			NA			Asian		lung_cancer	CCLE	RIKEN	EPITHELIAL-LIKE ADHERENT CELLS	MEM+10%FBS	NA	5%DMSO		51.3	lung_NSC	lung_NSC	Lung:NSCLC_Squamous	124.676	LUSC
SKMES1_LUNG	ACH-000665	SK-MES-1	metastasis	lung	NS	NS	NS	carcinoma	squamous_cell_carcinoma	NS	NS	male		65	caucasian		Caucasian	pleura	lung_cancer	CCLE							NA	lung_NSC	lung_NSC	Lung:NSCLC_Squamous	148.36	LUSC
NCIH520_LUNG	ACH-000395	NCI-H520	primary	lung	NS	NS	NS	carcinoma	squamous_cell_carcinoma	NS	NS	male		NA			Caucasian			CCLE	ATCC	ADHERENT EPITHELIAL;	RPMI-1640+10% FBS	NA	5%DMSO		47.3	lung_NSC	lung_NSC	Lung:NSCLC_Squamous	102.745	LUSC
JHH5_LIVER	ACH-000734	JHH-5	primary	liver	NS	NS	NS	carcinoma	hepatocellular_carcinoma	NS	NS	male		50	asian	japan	Asian			CCLE	HSSRB	Epithelial-like	Williams E Medium + 10%FBS	NA	5%DMSo		40.3	liver	liver	Liver:HCC	187.819	LIHC
FU97_STOMACH	ACH-000633	FU97	primary	stomach	NS	NS	NS	carcinoma	diffuse_adenocarcinoma	NS	NS	female		66	asian	japan	Asian			CCLE	HSRRB	ADHRENT EPITHELIAL; was clumpy	DMEM + 10% FBS	10mg/L INSULIN	5% DMSO	95 hrs	48.5	stomach	stomach	Gastric:Carcinoma	194.236	STAD
COLO800_SKIN	ACH-000401	COLO-800	primary	skin	NS	NS	NS	malignant_melanoma	NS	NS	NS	male		14			Caucasian			CCLE	ATCC	Epithelial monolayer. Some look like fibroblasts or neurons.	RPMI-1640+10% FBS	NA	10%DMSO		47.8	melanoma	melanoma	Skin:Melanoma	99.2358	SKCM
NCIH1963_LUNG	ACH-000729	NCI-H1963	primary	lung	NS	NS	NS	carcinoma	small_cell_carcinoma	NS	NS	male		56	african_american		African_american			CCLE	ATCC	Suspension	RPMI-1640+10%FBS	NA	5% DMSO		NA	lung_small_cell	lung_small_cell	Lung:SCLC	157.898	SCLC
RL952_ENDOMETRIUM	ACH-000965	RL95-2	primary	endometrium	NS	NS	NS	carcinoma	mixed_adenosquamous_carcinoma	NS	NS	female		65	caucasian		Caucasian			CCLE	NIBRI						NA	endometrium	endometrium	Endometrium:Carcinoma	580.625	UCEC
J82_URINARY_TRACT	ACH-000396	J82	primary	urinary_tract	bladder	NS	NS	carcinoma	transitional_cell_carcinoma	NS	NS	male		58	caucasian	sweden	Caucasian			CCLE	ATCC	epithelial adherent	EMEM+10%FBS	NA	5%DMSO		34.4	urinary_tract	urinary_tract	Bladder:Carcinoma	119.655	BLCA
HCC15_LUNG	ACH-000878	HCC-15	primary	lung	NS	NS	NS	carcinoma	squamous_cell_carcinoma	NS	NS	male		47	african_american		African_american		lung_cancer	CCLE	DSMZ	mixed; dt= 72-96 hrs	RPMI-1640 + 10%FBS	NA	5% DMSO		51.7	lung_NSC	lung_NSC	Lung:NSCLC_Squamous	264.621	LUSC
M059K_CENTRAL_NERVOUS_SYSTEM	ACH-000152	M059K	primary	central_nervous_system	brain	NS	NS	glioma	astrocytoma_Grade_IV	glioblastoma_multiforme	NS	male		33			Caucasian			CCLE	ATCC	adherent fibroblast	DMEM:F12 +10% FBS	NA	5% DMSO		164.5	glioma	glioma	CNS:Glioma_HighGrade	86.5595	GBM
CALU6_LUNG	ACH-000264	Calu-6	primary	lung	NS	NS	NS	carcinoma	undifferentiated_carcinoma	NS	NS	female		61	caucasian		Caucasian		lung_cancer	CCLE	ATCC	Adherent	EMEM +10%FBS	NA	5% DMSO		78.9	lung_NSC	lung_NSC	Lung:NSCLC_Others	87.7772	LUAD
SKLU1_LUNG	ACH-000309	SK-LU-1	primary	lung	NS	NS	NS	carcinoma	adenocarcinoma	NS	NS	female		60	caucasian		Caucasian			CCLE	ATCC	Adherent	MEM+10%FBS	NA	5% DMSO		174.6	lung_NSC	lung_NSC	Lung:NSCLC_Adeno	72.9599	LUAD
SW900_LUNG	ACH-000669	SW 900	primary	lung	NS	NS	NS	carcinoma	squamous_cell_carcinoma	NS	NS	male		53	caucasian		Caucasian			CCLE		Adherent epithelial	L15+10%FBS	NA	5%DMSO		NA	lung_NSC	lung_NSC	Lung:NSCLC_Squamous	144.276	LUSC
UACC62_SKIN	ACH-000425	UACC-62	primary	skin	NS	NS	NS	malignant_melanoma	NS	NS	NS			NA			Caucasian		melanoma	CCLE							207.6	melanoma	melanoma	Skin:Melanoma	110.204	SKCM
MFE280_ENDOMETRIUM	ACH-000192	MFE-280	primary	endometrium	NS	NS	NS	carcinoma	adenocarcinoma	NS	NS	female		77			Caucasian		recurrent_endometrial_carcinoma	CCLE	NIBRI						NA	endometrium	endometrium	Endometrium:Carcinoma	86.6912	UCEC
MFE319_ENDOMETRIUM	ACH-000988	MFE-319	primary	endometrium	NS	NS	NS	carcinoma	adenocarcinoma	NS	NS	female		81			Caucasian		Endometrial Cancer	CCLE	NIBRI						NA	endometrium	endometrium	Endometrium:Carcinoma	1280.55	UCEC
MFE296_ENDOMETRIUM	ACH-000879	MFE-296	primary	endometrium	NS	NS	NS	carcinoma	adenocarcinoma	NS	NS	female		68	caucasian		Caucasian			CCLE			RPM:MEM +20% FBS	2mM L-glutamine, Insulin, Transferrin, Selenite			45.07	endometrium	endometrium	Endometrium:Carcinoma	267.711	UCEC
GOS3_CENTRAL_NERVOUS_SYSTEM	ACH-000027	GOS-3	primary	central_nervous_system	brain	NS	NS	glioma	astrocytoma	NS	NS	male		55			Caucasian		Brain Cancer	CCLE	GNF						NA	glioma	glioma	CNS:Glioma	91.5167	NA
GI1_CENTRAL_NERVOUS_SYSTEM	ACH-000756	GI-1	primary	central_nervous_system	brain	NS	NS	glioma	gliosarcoma	NS	NS	male		61	asian		Asian			CCLE	RIKEN	ADHERENT FIBROBLAST LIKE	DMEM+10%FBS		5% DMSO		35.1	glioma	glioma	CNS:Glioma	189.829	LGG
PC14_LUNG	ACH-000030	PC-14	primary	lung	NS	NS	NS	carcinoma	non_small_cell_carcinoma	NS	NS			NA	asian		Asian		lung_cancer	CCLE	RIKEN	adherent	RPMI+10%FBS	NA	5%DMSO		35.2966	lung_NSC	lung_NSC	Lung:NSCLC_Others	151.071	LUAD
KYSE410_OESOPHAGUS	ACH-000809	KYSE-410	primary	oesophagus	upper_third	NS	NS	carcinoma	squamous_cell_carcinoma	NS	NS	male		51	asian	japan	Asian			CCLE	DSMZ	Epithelial adherent monolayer	RPMI-1640+10%FBS	NA	10%DMSO		17.4	esophagus	esophagus	Oesophagus:Carcinoma	201.105	ESCA
A204_SOFT_TISSUE	ACH-000201	A-204	primary	soft_tissue	striated_muscle	NS	NS	rhabdoid_tumour	NS	NS	NS	female	pediatric	1			Caucasian			CCLE	NIBRI						NA	soft_tissue	soft_tissue	Soft_Tissue:Sarcoma_Rhabdoid	92.6719	SARC
PATU8902_PANCREAS	ACH-000599	PA-TU-8902	primary	pancreas	NS	NS	NS	carcinoma	ductal_carcinoma	NS	NS	female		44			Caucasian			CCLE	DSMZ	Epithelial Adherent cells in monolayer	DMEM + 10%FBS	2mM L-Glutamine	10%DMSO		57.6	pancreas	pancreas	Pancreas:Carcinoma	140.236	PAAD
NCIH810_LUNG	ACH-000789	NCI-H810	primary	lung	NS	NS	NS	carcinoma	large_cell_carcinoma	NS	NS	male		51	african_american		African_american			CCLE	GNF						NA	lung_NSC	lung_NSC	Lung:NSCLC_Large_Cell	172.25	NA
RERFLCMS_LUNG	ACH-000062	RERF-LC-MS	primary	lung	NS	NS	NS	carcinoma	non_small_cell_carcinoma	NS	NS			NA	asian		Asian		lung_cancer	CCLE	JCRB	Adherent; dt=42.7 hrs	EMEM+10%FBS	NEAA	5% DMSO		68.9	lung_NSC	lung_NSC	Lung:NSCLC_Others	105.681	LUAD
L1236_HAEMATOPOIETIC_AND_LYMPHOID_TISSUE	ACH-000702	L-1236	primary	haematopoietic_and_lymphoid_tissue	NS	NS	NS	lymphoid_neoplasm	Hodgkin_lymphoma	NS	NS	male		34			Caucasian		lymphoma	CCLE	DSMZ	Mix	RPMI+10%FBS	NA	5%DMSO	48 hrs	89.9	lymphoma_Hodgkin	lymphoma_Hodgkin	Lymphoma:Hodgkin	160.9	NA
DANG_PANCREAS	ACH-000243	DAN-G	primary	pancreas	NS	NS	NS	carcinoma	NS	NS	NS			NA			Caucasian		Pancreatic Cancer	CCLE	DSMZ	ADHERENT EPITHELOID CELLS GROWING IN MONOLAYERS	RPMI-1640+ 10%FBS	NA	5% DMSO	33 hrs	43.3	pancreas	pancreas	Pancreas:Carcinoma	90.3843	PAAD
NCIH460_LUNG	ACH-000463	NCI-H460	metastasis	lung	NS	NS	NS	carcinoma	large_cell_carcinoma	NS	NS	male		NA			Caucasian	pleura	large_cell_lung_cancer	CCLE	ATCC	Adherent	RPMI-1640+10%FBS	NA	5% DMSO		25.5	lung_NSC	lung_NSC	Lung:NSCLC_Large_Cell	119.635	NA
KYSE140_OESOPHAGUS	ACH-000823	KYSE-140	primary	oesophagus	middle_third	NS	NS	carcinoma	squamous_cell_carcinoma	NS	NS	male		54	asian	japan	Asian			CCLE	DSMZ	Adherent monolayer	RPMI 1640+10%FBS	NA	10%DMSO		27.5	esophagus	esophagus	Oesophagus:Carcinoma	203.625	ESCA
KYSE180_OESOPHAGUS	ACH-000693	KYSE-180	primary	oesophagus	middle_third	NS	NS	carcinoma	squamous_cell_carcinoma	NS	NS	male		53	asian	japan	Asian			CCLE	DSMZ	EPITHELOID CELLS GROWING AS ADHERENT MONOLAYER	RPMI-1640 +10% FBS	NA	5%DMSO	40-50 hrs	34.1	esophagus	esophagus	Oesophagus:Carcinoma	158.794	ESCA
HUPT3_PANCREAS	ACH-000118	HUP-T3	metastasis	pancreas	NS	NS	NS	carcinoma	NS	NS	NS	male		66	asian	japan	Asian	ascites		CCLE	DSMZ	adherent; dt=40-50hrs	EMEM+10%FBS	1% NEAA + 1% sodium pyruvate	10% DMSO		106	pancreas	pancreas	Pancreas:Carcinoma	116.559	PAAD
EFE184_ENDOMETRIUM	ACH-000435	EFE-184	metastasis	endometrium	NS	NS	NS	carcinoma	NS	NS	NS	female		69	caucasian		Caucasian	ascites		CCLE	DSMZ	EPITHELOID CELLS GROWING IN MONOLAYERS	RPMI-1640+10% FBS	NA	5% DMSO	92 hrs	89.9	endometrium	endometrium	Endometrium:Carcinoma	115.68	UCEC
GCIY_STOMACH	ACH-000047	GCIY	primary	stomach	NS	NS	NS	carcinoma	adenocarcinoma	NS	NS	female		NA	asian		Asian			CCLE	GNF						NA	stomach	stomach	Gastric:Carcinoma	88.6658	STAD
SH10TC_STOMACH	ACH-000764	SH-10-TC	primary	stomach	NS	NS	NS	carcinoma	NS	NS	NS			NA			Asian			CCLE	RIKEN	Adherent	RPMI 1640 +10%FBS	NA	5% DMSO		66	stomach	stomach	Gastric:Carcinoma	207.722	STAD
CAOV4_OVARY	ACH-000103	Caov-4	metastasis	ovary	NS	NS	NS	carcinoma	adenocarcinoma	NS	NS	female		45	caucasian		Caucasian	NS		CCLE		Adherent			5%DMSO		NA	ovary	ovary	NA	77.2925	OV
HCC2218_BREAST	ACH-000755	HCC2218	primary	breast	NS	NS	NS	carcinoma	ductal_carcinoma	NS	NS	female		38	caucasian		Caucasian			CCLE	ATCC	SUSPENSION	RPMI 1640 +10%FBS	NA	5% DMSO		147.7	breast	breast	Breast:Carcinoma	168.921	BRCA
KMS21BM_HAEMATOPOIETIC_AND_LYMPHOID_TISSUE	ACH-000598	KMS-21BM	primary	haematopoietic_and_lymphoid_tissue	NS	NS	NS	lymphoid_neoplasm	plasma_cell_myeloma	NS	NS	male		62	asian		Asian			CCLE	HSSRB	lymphocyte-like	RPMI 1640 medium with 10% fetal bovine serum.	NA		NA	NA	multiple_myeloma	multiple_myeloma	Lymphoma:Multiple_Myeloma	160.281	MM
KMS26_HAEMATOPOIETIC_AND_LYMPHOID_TISSUE	ACH-000588	KMS-26	primary	haematopoietic_and_lymphoid_tissue	NS	NS	NS	lymphoid_neoplasm	plasma_cell_myeloma	NS	NS	male		50	asian		Asian		multiple_myeloma	CCLE		suspension	RPMI1640+10%FBS	NA	5%DMSO		33.2	multiple_myeloma	multiple_myeloma	Lymphoma:Multiple_Myeloma	149.702	MM
KMS27_HAEMATOPOIETIC_AND_LYMPHOID_TISSUE	ACH-000576	KMS-27	primary	haematopoietic_and_lymphoid_tissue	NS	NS	NS	lymphoid_neoplasm	plasma_cell_myeloma	NS	NS	male		52	asian		Asian		multiple_myeloma	CCLE		suspension	RPMI1640+10%FBS	NA	5%DMSO		73.2	multiple_myeloma	multiple_myeloma	Lymphoma:Multiple_Myeloma	169.055	MM
KO52_HAEMATOPOIETIC_AND_LYMPHOID_TISSUE	ACH-000498	KO52	primary	haematopoietic_and_lymphoid_tissue	NS	NS	NS	haematopoietic_neoplasm	acute_myeloid_leukaemia	M2	NS	male		46			Asian			CCLE	HSSRB		MEM + 10% FBS	NA	10%DMSO		NA	AML	AML	Leukemia:AML	NA	LAML
KMS28BM_HAEMATOPOIETIC_AND_LYMPHOID_TISSUE	ACH-000419	KMS-28BM	primary	haematopoietic_and_lymphoid_tissue	NS	NS	NS	lymphoid_neoplasm	plasma_cell_myeloma	NS	NS	female		77	asian		Asian			CCLE	HSSRB	suspension	RPMI +10%FBS	NA	5% DMSO		60	multiple_myeloma	multiple_myeloma	Lymphoma:Multiple_Myeloma	151.68	MM
KNS60_CENTRAL_NERVOUS_SYSTEM	ACH-000445	KNS-60	primary	central_nervous_system	brain	NS	NS	glioma	astrocytoma_Grade_IV	glioblastoma_multiforme	NS	male		55			Asian			CCLE	HSSRB	polygonal-epithelial	Dulbecco's modified Eagle's medium with 5% fetal bovine serum	NA		NA	NA	glioma	glioma	CNS:Glioma_HighGrade	142.794	GBM
KNS81_CENTRAL_NERVOUS_SYSTEM	ACH-000479	KNS-81	primary	central_nervous_system	brain	NS	NS	glioma	astrocytoma_Grade_IV	glioblastoma_multiforme	NS	male		65			Asian			CCLE	HSSRB	Fibroblast-like	DMEM+15%FBS	NA	10%DMSO		70	glioma	glioma	CNS:Glioma_HighGrade	163.53	GBM
KPNSI9S_AUTONOMIC_GANGLIA	ACH-000446	KP-N-SI9s	metastasis	autonomic_ganglia	NS	NS	NS	neuroblastoma	NS	NS	NS			NA			Asian	lymph_node		CCLE	HSSRB	NA	RPMI 1640 medium wiyh10% fetal bovine serum	NA		NA	NA	neuroblastoma	neuroblastoma	PNET:Neuroblastoma	146.335	NB
LU99_LUNG	ACH-000444	LU99	metastasis	lung	NS	NS	NS	carcinoma	large_cell_carcinoma	NS	NS	male		63	asian		Asian			CCLE	HSRRB	Adherent	RPMI 1640 +10% FBS	NA	5% DMSO		40.4	lung_NSC	lung_NSC	Lung:NSCLC_Large_Cell	165.09	NA
KMS34_HAEMATOPOIETIC_AND_LYMPHOID_TISSUE	ACH-000541	KMS-34	primary	haematopoietic_and_lymphoid_tissue	NS	NS	NS	lymphoid_neoplasm	plasma_cell_myeloma	NS	NS	female		60	asian		Asian		multiple_myeloma	CCLE	HSRRB	Supsension		NA	5% DMSO		85.9	multiple_myeloma	multiple_myeloma	Lymphoma:Multiple_Myeloma	136.827	MM
MKN1_STOMACH	ACH-000351	MKN1	metastasis	stomach	NS	NS	NS	carcinoma	mixed_adenosquamous_carcinoma	NS	NS	male		72	asian	japan	Asian	lymph_node		CCLE	HSSRB	epithelial-like	RPMI 1640 medium with 10% fetal calf serum.	NA		NA	NA	stomach	stomach	Gastric:Carcinoma	148.071	STAD
MKN74_STOMACH	ACH-000758	MKN74	metastasis	stomach	NS	NS	NS	carcinoma	tubular_adenocarcinoma	NS	NS	male		37	asian	japan	Asian	liver	gastric_cancer	CCLE	HSSRB	epithelial-like	RPMI 1640 medium with 10% heat inactivated fetal bovine serum	NA		NA	NA	stomach	stomach	Gastric:Carcinoma	190.585	STAD
KP3_PANCREAS	ACH-000108	KP-3	metastasis	pancreas	NS	NS	NS	carcinoma	ductal_carcinoma	NS	NS	male		75	asian	japan	Asian	liver		CCLE	HSSRB	epithelial-like	RPMI 1640 medium with 10% fetal bovine serum	NA		NA	NA	pancreas	pancreas	Pancreas:Carcinoma	110.456	UNABLE TO CLASSIFY
NCO2_HAEMATOPOIETIC_AND_LYMPHOID_TISSUE	ACH-000076	NCO2	primary	haematopoietic_and_lymphoid_tissue	NS	NS	NS	haematopoietic_neoplasm	chronic_myeloid_leukaemia	NS	NS	female		35			Asian			CCLE	HSSRB						NA	CML	CML	Leukemia:CML	110.674	LCML
KHM1B_HAEMATOPOIETIC_AND_LYMPHOID_TISSUE	ACH-000564	KHM-1B	primary	haematopoietic_and_lymphoid_tissue	NS	NS	NS	lymphoid_neoplasm	plasma_cell_myeloma	NS	NS	male		53			Asian			CCLE	HSSRB	SUSPENSION, LYMPHOCYTE-LIKE	RPMI-1640+10% FBS	NA	5%DMSO		112.8	multiple_myeloma	multiple_myeloma	Lymphoma:Multiple_Myeloma	142.206	MM
HSC2_UPPER_AERODIGESTIVE_TRACT	ACH-000472	HSC-2	primary	upper_aerodigestive_tract	mouth	NS	NS	carcinoma	squamous_cell_carcinoma	NS	NS	male		69			Asian			CCLE	HSSRB	Epithelial-like	EMEM+10%FBS				37.7	upper_aerodigestive	upper_aerodigestive	Upper_Aerodigestive_Tract:Carcinoma	155.965	HNSC
KG1C_CENTRAL_NERVOUS_SYSTEM	ACH-000126	KG-1-C	primary	central_nervous_system	brain	NS	NS	glioma	astrocytoma_Grade_IV	glioblastoma_multiforme	NS	male		13			Asian			CCLE	HSRRB	Adherent	DMEM + 10% FBS	NA	5% DMSO		111.4	glioma	glioma	CNS:Glioma_HighGrade	108.949	GBM
HUH7_LIVER	ACH-000480	HuH-7	primary	liver	NS	NS	NS	carcinoma	hepatocellular_carcinoma	NS	NS	male		57	asian	japan	Asian			CCLE	HSSRB	NA	Dulbecco's modified Eagle's medium with 10% fetal bovine serum. Refer cancer Res. 42:3858 (1982) for other medium with low serum concentration.	NA		NA	NA	liver	liver	Liver:HCC	156.9	LIHC
KMBC2_URINARY_TRACT	ACH-000862	KMBC-2	primary	urinary_tract	bladder	NS	NS	carcinoma	NS	NS	NS			NA			Asian			CCLE	HSRRB	round cells with vacuolization	Ham's F12 +10% FBS	NA	5%DMSO		137.9	urinary_tract	urinary_tract	Bladder:Carcinoma	254.443	BLCA
KMRC20_KIDNEY	ACH-000250	KMRC-20	primary	kidney	NS	NS	NS	carcinoma	renal_cell_carcinoma	NS	NS			NA			Asian			CCLE	HSSRB	ADHERENT	DMEM+10% FBS	NA	5%DMSO		65	kidney	kidney	Kidney:Carcinoma	148.637	KIRC
HUCCT1_BILIARY_TRACT	ACH-000976	HuCCT1	primary	biliary_tract	bile_duct	NS	NS	carcinoma	NS	NS	NS	male		NA	asian	japan	Asian			CCLE	HSSRB	NA	RPMI 1640 medium with 10% fetal bovine serum.	NA		NA	NA	bile_duct	bile_duct	Biliary_Tract:Carcinoma	1458.41	NA
KIJK_HAEMATOPOIETIC_AND_LYMPHOID_TISSUE	ACH-000773	Ki-JK	primary	haematopoietic_and_lymphoid_tissue	NS	NS	NS	lymphoid_neoplasm	anaplastic_large_cell_lymphoma	NS	NS	male		15			Asian			CCLE	HSSRB	lymphoblast-like	RPMI 1640 medium with 10% fetal calf serum.	NA		NA	NA	lymphoma_other	T-cell_lymphoma_other	Lymphoma:NH_T_cell	208.274	NA
A4FUK_HAEMATOPOIETIC_AND_LYMPHOID_TISSUE	ACH-000157	A4/Fuk	primary	haematopoietic_and_lymphoid_tissue	NS	NS	NS	lymphoid_neoplasm	diffuse_large_B_cell_lymphoma	NS	NS	female		52	asian		Asian			CCLE	JCRB	SUSPENSION	RPMI-10% FBS	NA	5% DMSO		118.1	lymphoma_DLBCL	lymphoma_DLBCL	Lymphoma:NH_B_cell	116.436	DLBC
KALS1_CENTRAL_NERVOUS_SYSTEM	ACH-000231	KALS-1	primary	central_nervous_system	brain	NS	NS	glioma	NS	NS	NS	female		NA			Asian			CCLE	HSSRB	Biporar polyglonal	RPMI1640+10%FBS	NA	10%DMSO		56.9	glioma	glioma	CNS:Glioma	129.408	LGG
HEC108_ENDOMETRIUM	ACH-000990	HEC-108	primary	endometrium	NS	NS	NS	carcinoma	adenocarcinoma	NS	NS	female		NA	asian		Asian			CCLE	HSSRB						63	endometrium	endometrium	Endometrium:Carcinoma	1579.74	UCEC
HEL9217_HAEMATOPOIETIC_AND_LYMPHOID_TISSUE	ACH-000005	HEL 92.1.7	primary	haematopoietic_and_lymphoid_tissue	NS	NS	NS	haematopoietic_neoplasm	acute_myeloid_leukaemia	M6	NS	male		30	caucasian		Caucasian		erythroleukemia	CCLE	NIBRI		RPMI-1640 + 10% FBS	NA	5%DMSO		116	AML	AML	Leukemia:AML	97.3392	LAML
HUH28_BILIARY_TRACT	ACH-000808	HuH28	primary	biliary_tract	bile_duct	NS	NS	carcinoma	NS	NS	NS			NA	asian	japan	Asian			CCLE	HSSRB	adherent	RPMI-1640+10% FBS	NA	5% DMSO	1 week	90.5	bile_duct	bile_duct	Biliary_Tract:Carcinoma	NA	NA
CMK115_HAEMATOPOIETIC_AND_LYMPHOID_TISSUE	ACH-001036	CMK-11-5	primary	haematopoietic_and_lymphoid_tissue	NS	NS	NS	haematopoietic_neoplasm	acute_myeloid_leukaemia	M7	NS			NA			Asian			CCLE	HSSRB	SUSPENSION	RPMI-1640 +10% FBS	NA	5% DMSO		49.8	AML	AML	NA	NA	LAML
HEC265_ENDOMETRIUM	ACH-000946	HEC-265	primary	endometrium	NS	NS	NS	carcinoma	adenocarcinoma	NS	NS	female		NA	asian		Asian			CCLE	HSSRB	epithelial-like	Eagle's minimal essential medium with 15% fetal bovine serum	NA		NA	NA	endometrium	endometrium	Endometrium:Carcinoma	550.065	UCEC
CAL12T_LUNG	ACH-000826	CAL-12T	primary	lung	NS	NS	NS	carcinoma	non_small_cell_carcinoma	NS	NS	male		NA			Caucasian			CCLE	GNF					~50 hrs	NA	lung_NSC	lung_NSC	Lung:NSCLC_Others	208.56	UNABLE TO CLASSIFY
THP1_HAEMATOPOIETIC_AND_LYMPHOID_TISSUE	ACH-000146	THP-1	primary	haematopoietic_and_lymphoid_tissue	NS	NS	NS	haematopoietic_neoplasm	acute_myeloid_leukaemia	M5	NS	male	pediatric	1			Asian		acute_monocytic_leukemia	CCLE	NIBRI		RPMI-1640 + 10% FBS	0.05 mM 2-mercaptoethanol	5%DMSO		101.8	AML	AML	Leukemia:AML	149.715	LAML
A3KAW_HAEMATOPOIETIC_AND_LYMPHOID_TISSUE	ACH-000697	A3/KAW	primary	haematopoietic_and_lymphoid_tissue	NS	NS	NS	lymphoid_neoplasm	diffuse_large_B_cell_lymphoma	NS	NS	female		NA			Asian			CCLE	HSRRB	suspension; grows in aggregates			5% DMSO		40	lymphoma_DLBCL	lymphoma_DLBCL	Lymphoma:NH_B_cell	211.426	DLBC
SKNSH_AUTONOMIC_GANGLIA	ACH-000149	SK-N-SH	metastasis	autonomic_ganglia	NS	NS	NS	neuroblastoma	NS	NS	NS	female		4			Caucasian	bone_marrow	neuroblastoma	CCLE	ATCC		EMEM+10% FBS	NA	5%DMSO		50.6	neuroblastoma	neuroblastoma	PNET:Neuroblastoma	NA	NB
HCC1954_BREAST	ACH-000859	HCC1954	primary	breast	NS	NS	NS	carcinoma	ductal_carcinoma	NS	NS	female		61	east_indian		Caucasian		breast_cancer	CCLE		Adherent	RPMI 1640 + 10%FBS	na	5% DMSO		NA	breast	breast	Breast:Carcinoma	198.165	BRCA
CAMA1_BREAST	ACH-000783	CAMA-1	metastasis	breast	NS	NS	NS	carcinoma	NS	NS	NS	female		51	caucasian		Caucasian	pleura	breast_cancer	CCLE	ATCC	Adherent epithelial	EMEM+10%FBS	NA	5%DMSO		114.8	breast	breast	Breast:Carcinoma	168.522	BRCA
HEC6_ENDOMETRIUM	ACH-000984	HEC-6	primary	endometrium	NS	NS	NS	carcinoma	adenocarcinoma	NS	NS	female		NA	asian		Asian			CCLE	HSSRB	epithelial-like	Eagle's minimal essential medium with 15% fetal calf serum	NA		NA	NA	endometrium	endometrium	Endometrium:Carcinoma	971.975	UCEC
AM38_CENTRAL_NERVOUS_SYSTEM	ACH-000269	AM-38	primary	central_nervous_system	brain	NS	NS	glioma	astrocytoma_Grade_IV	glioblastoma_multiforme	NS	male		36			Asian			CCLE	HSSRB	NA	Eagle's minimal essential with 20% heat inactivated fetal bovine serum	NA		NA	NA	glioma	glioma	CNS:Glioma_HighGrade	137.27	GBM
HEC50B_ENDOMETRIUM	ACH-000831	HEC-50B	primary	endometrium	NS	NS	NS	carcinoma	adenocarcinoma	NS	NS	female		NA	asian		Asian			CCLE	HSSRB	epithelial-like	Eagle's minimal essential medium with 15% fetal calf serum			NA	NA	endometrium	endometrium	Endometrium:Carcinoma	231.91	UCEC
HSC3_UPPER_AERODIGESTIVE_TRACT	ACH-000778	HSC-3	metastasis	upper_aerodigestive_tract	mouth	tongue	NS	carcinoma	squamous_cell_carcinoma	NS	NS	male		64			Asian			CCLE	HSSRB		EMEM+10%FBS		5%DMSO		74.6	upper_aerodigestive	upper_aerodigestive	Upper_Aerodigestive_Tract:Carcinoma	231.766	HNSC
HSC4_UPPER_AERODIGESTIVE_TRACT	ACH-000546	HSC-4	primary	upper_aerodigestive_tract	mouth	tongue	NS	carcinoma	squamous_cell_carcinoma	NS	NS	male		64			Asian			CCLE	HSSRB	epithelial-like	Eagle's minimal essential medium with 10% calf serum (FCS can be used)	NA		NA	NA	upper_aerodigestive	upper_aerodigestive	Upper_Aerodigestive_Tract:Carcinoma	148.282	HNSC
KMS11_HAEMATOPOIETIC_AND_LYMPHOID_TISSUE	ACH-000714	KMS-11	primary	haematopoietic_and_lymphoid_tissue	NS	NS	NS	lymphoid_neoplasm	plasma_cell_myeloma	NS	NS	female		67	asian		Asian		multiple_myeloma	CCLE	HSRRB	adherent	RPMI 1640+20%FBS	NA	5% DMSO		82.2	multiple_myeloma	multiple_myeloma	Lymphoma:Multiple_Myeloma	191.308	MM
KP4_PANCREAS	ACH-000265	KP4	metastasis	pancreas	NS	NS	NS	carcinoma	ductal_carcinoma	NS	NS	male		50	asian	japan	Asian	ascites		CCLE		adherent	IMDM+10%FBS	NA	5%DMSO		NA	pancreas	pancreas	Pancreas:Carcinoma	143.11	PAAD
KE39_STOMACH	ACH-000507	KE-39	metastasis	stomach	NS	NS	NS	carcinoma	NS	NS	NS	male		77	asian	japan	Asian	lymph_node		CCLE	RIKEN	Adherent	RPMI 1640 +10%FBS	NA	5% DMSO		92	stomach	stomach	Gastric:Carcinoma	148.434	STAD
COV504_OVARY	ACH-001048	COV504	primary	ovary	NS	NS	NS	carcinoma	NS	NS	NS	female		NA			Caucasian			CCLE	GNF						NA	ovary	ovary	NA	NA	OV
KE97_HAEMATOPOIETIC_AND_LYMPHOID_TISSUE	ACH-000167	KE-97	primary	haematopoietic_and_lymphoid_tissue	NS	NS	NS	lymphoid_neoplasm	plasma_cell_myeloma	NS	NS	male		52	asian	japan	Asian	peritoneum		CCLE	RIKEN	Adherent	RPMI 1640 +10%FBS	NA	5% DMSO		40.3	multiple_myeloma	multiple_myeloma	Lymphoma:Multiple_Myeloma	117.104	MM
VMRCRCW_KIDNEY	ACH-000484	VMRC-RCW	primary	kidney	NS	NS	NS	carcinoma	NS	NS	NS	male		NA			Caucasian			CCLE		adherent	EMEM+10%FBS	NA	5%DMSO		NA	kidney	kidney	Kidney:Carcinoma	107.451	KIRC
HGC27_STOMACH	ACH-000847	HGC-27	metastasis	stomach	NS	NS	NS	carcinoma	undifferentiated_adenocarcinoma	NS	NS			NA	asian		Asian	lymph_node		CCLE	GNF						NA	stomach	stomach	Gastric:Carcinoma	247.101	STAD
LUDLU1_LUNG	ACH-000390	LUDLU-1	primary	lung	NS	NS	NS	carcinoma	squamous_cell_carcinoma	NS	NS	male		72	caucasian		Caucasian			CCLE	ECAAC	epithelial, adherent	RPMI-1640+10% FBS	NA	5% DMSO		120.7	lung_NSC	lung_NSC	Lung:NSCLC_Squamous	108.903	LUSC
HUG1N_STOMACH	ACH-000239	HuG1-N	primary	stomach	NS	NS	NS	carcinoma	NS	NS	NS	male		55	asian	japan	Asian			CCLE	GNF						NA	stomach	stomach	Gastric:Carcinoma	146.937	STAD
U266B1_HAEMATOPOIETIC_AND_LYMPHOID_TISSUE	ACH-000626	U266B1	primary	haematopoietic_and_lymphoid_tissue	NS	NS	NS	lymphoid_neoplasm	plasma_cell_myeloma	NS	NS	male		53			Caucasian		myeloma	CCLE	ATCC	Suspension Lymphoblast	RPMI1640+15%FBS		5%DMSO		198.1	multiple_myeloma	multiple_myeloma	Lymphoma:Multiple_Myeloma	125.358	MM
NUGC4_STOMACH	ACH-000674	NUGC-4	metastasis	stomach	NS	NS	NS	carcinoma	signet_ring_adenocarcinoma	NS	NS	female		35	asian	japan	Asian	lymph_node		CCLE	GNF						NA	stomach	stomach	Gastric:Carcinoma	175.016	STAD
BGC823_STOMACH	ACH-001017	BGC-823	primary	stomach	NS	NS	NS	carcinoma	adenocarcinoma	NS	NS	male		62	asian	chinese	African_american			CCLE	NA	NA	NA	NA	NA	NA	NA	stomach	stomach	NA	NA	STAD
HMC18_BREAST	ACH-000721	HMC-1-8	metastasis	breast	NS	NS	NS	carcinoma	NS	NS	NS	female		35	asian		Asian			CCLE	HSSRB	Adherent	RPMI 1640 +10%FBS	NA	5% DMSO		63.3	breast	breast	Breast:Carcinoma	204.833	BRCA
CAS1_CENTRAL_NERVOUS_SYSTEM	ACH-000464	CAS-1	primary	central_nervous_system	brain	NS	NS	glioma	astrocytoma_Grade_IV	glioblastoma_multiforme	NS	male		63			Caucasian			CCLE	ICLC	Adherenet	DMEM +10%FBS	NA	5% DMSO		79.5	glioma	glioma	CNS:Glioma_HighGrade	119.269	GBM
KMM1_HAEMATOPOIETIC_AND_LYMPHOID_TISSUE	ACH-000889	KMM-1	primary	haematopoietic_and_lymphoid_tissue	NS	NS	NS	lymphoid_neoplasm	plasma_cell_myeloma	NS	NS	male		62	asian		Asian		multiple_myeloma	CCLE	HSSRB	lymphocyte-like	RPMI 1640 medium with 10% fetal bovine serum.	NA		NA	NA	multiple_myeloma	multiple_myeloma	Lymphoma:Multiple_Myeloma	279.613	MM
CORL23_LUNG	ACH-000662	COR-L23	metastasis	lung	NS	NS	NS	carcinoma	large_cell_carcinoma	NS	NS	male		62	caucasian		Caucasian			CCLE	ECAAC	adherent	RPMI 1640 + 10%FBS	2mM L-glutamine	5% DMSO		33.4	lung_NSC	lung_NSC	Lung:NSCLC_Large_Cell	137.338	NA
MORCPR_LUNG	ACH-000851	MOR/CPR	primary	lung	NS	NS	NS	carcinoma	adenocarcinoma	NS	NS			NA			Caucasian		Lung Cancer	CCLE	ECACC	aggregates in suspension	RPMI-1640+ 10%FBS	2mM glutamine; 1ug/ml cisplatin	5%DMSO		NA	lung_NSC	lung_NSC	Lung:NSCLC_Adeno	232.805	LUAD
HARA_LUNG	ACH-000843	HARA	metastasis	lung	NS	NS	NS	carcinoma	squamous_cell_carcinoma	NS	NS	male		57	asian		Asian		Lung Cancer	CCLE	HSRRB	ADHERENT; fast grower	RPMI-1640+10% FBS	NA	5% DMSO		63.7	lung_NSC	lung_NSC	Lung:NSCLC_Squamous	233.553	LUSC
SKOV3_OVARY	ACH-000811	SK-OV-3	metastasis	ovary	NS	NS	NS	carcinoma	adenocarcinoma	NS	NS	female		64	caucasian		Caucasian	ascites	ovarian_cancer	CCLE	NIBRI						NA	ovary	ovary	Ovary:Carcinoma	198.968	OV
HPAFII_PANCREAS	ACH-000094	HPAF-II	metastasis	pancreas	NS	NS	NS	carcinoma	ductal_carcinoma	NS	NS	male		44	caucasian		Caucasian	ascites		CCLE	ATCC	ADHERENT EPITHELIAL;	EMEM+10% FBS	NA	5%DMSO		79	pancreas	pancreas	Pancreas:Carcinoma	85.2969	PAAD
MC116_HAEMATOPOIETIC_AND_LYMPHOID_TISSUE	ACH-000583	MC116	metastasis	haematopoietic_and_lymphoid_tissue	NS	NS	NS	lymphoid_neoplasm	B_cell_lymphoma_unspecified	NS	NS	male		NA			Caucasian	pleura	undifferentiated B lymphoma	CCLE	ATCC	SUSPENSION LYMPHOBLASTS	RPMI-1640+20%FBS	NA	5%DMSO	26-28 hrs	44.4	lymphoma_other	B-cell_lymphoma_other	Lymphoma:NH_B_cell	132.919	DLBC
NCIH1568_LUNG	ACH-000869	NCI-H1568	metastasis	lung	NS	NS	NS	carcinoma	non_small_cell_carcinoma	NS	NS	female		48	caucasian		Caucasian	lymph_node		CCLE	ATCC	adherent	RPMI+10%FBS	NA	5% DMSO		67	lung_NSC	lung_NSC	Lung:NSCLC_Adeno	238.762	LUAD
CA46_HAEMATOPOIETIC_AND_LYMPHOID_TISSUE	ACH-000440	CA46	metastasis	haematopoietic_and_lymphoid_tissue	NS	NS	NS	lymphoid_neoplasm	Burkitt_lymphoma	NS	NS	male		NA			Asian	ascites		CCLE	ATCC	Adherent	RPMI + 10 % FBS	NA	5%DMSO		25.7	lymphoma_Burkitt	lymphoma_Burkitt	Lymphoma:NH_B_cell	135.041	DLBC
A498_KIDNEY	ACH-000555	A-498	primary	kidney	NS	NS	NS	carcinoma	renal_cell_carcinoma	NS	NS	male		52			Caucasian		renal_cell_carcinoma	CCLE		adherent	EMEM+10%FBS	NA	5%DMSO		53.6	kidney	kidney	Kidney:Carcinoma	108.038	KIRC
BCP1_HAEMATOPOIETIC_AND_LYMPHOID_TISSUE	ACH-000923	BCP-1	primary	haematopoietic_and_lymphoid_tissue	NS	NS	NS	lymphoid_neoplasm	B_cell_lymphoma_unspecified	NS	NS	male		92			Caucasian			CCLE	ATCC	Supsension	RPMI +20% FBS	NA	5%DMSO		NA	lymphoma_other	B-cell_lymphoma_other	Lymphoma:NH_B_cell	353.101	DLBC
A673_BONE	ACH-000052	A-673	primary	bone	NS	NS	NS	Ewings_sarcoma-peripheral_primitive_neuroectodermal_tumour	NS	NS	NS	female		15			Caucasian		Ewings_sarcoma	CCLE	NIBRI						NA	Ewings_Sarcoma	Ewings_sarcoma	Bone:Sarcoma_Ewing	61.2105	SARC
AU565_BREAST	ACH-000248	AU565	metastasis	breast	NS	NS	NS	carcinoma	NS	NS	NS	female		43	caucasian		Caucasian	pleura	breast_cancer	CCLE	ATCC	Adherenet	RPMI 1640 + 10%FBS	NA	5% DMSO		74.1	breast	breast	Breast:Carcinoma	223.382	BRCA
COLO201_LARGE_INTESTINE	ACH-000253	COLO 201	metastasis	large_intestine	colon	NS	NS	carcinoma	adenocarcinoma	NS	NS	male		70	caucasian		Caucasian	ascites	colon_cancer	CCLE		Suspension with some loosely attached cells	RPMI-1640+10% FBS	NA	5%DMSO		NA	colorectal	colorectal	Colorectal:Carcinoma	94.6101	COAD/READ
CAPAN1_PANCREAS	ACH-000354	Capan-1	metastasis	pancreas	NS	NS	NS	carcinoma	ductal_carcinoma	NS	NS	male		40	caucasian		Caucasian	liver		CCLE	ATCC	Adherent	IMDM +20% FBS	NA	5%DMSO		148.4	pancreas	pancreas	Pancreas:Carcinoma	94.4755	PAAD
NCIH1563_LUNG	ACH-000892	NCI-H1563	primary	lung	NS	NS	NS	carcinoma	adenocarcinoma	NS	NS	male		NA			Caucasian			CCLE	ATCC	adherent	RPMI+10%FBS	NA	5% DMSO		165.5	lung_NSC	lung_NSC	Lung:NSCLC_Adeno	272.04	LUAD
NCIH358_LUNG	ACH-000860	NCI-H358	primary	lung	NS	NS	NS	carcinoma	bronchioloalveolar_adenocarcinoma	NS	NS	male		NA			Caucasian		bronchioalveolar_carcinoma; non-small_cell lung_cancer	CCLE	ATCC	adherenet	RPMI+10%FBS	NA	5%DMSO		73.9	lung_NSC	lung_NSC	Lung:NSCLC_Adeno	218.724	LUAD
CFPAC1_PANCREAS	ACH-000138	CFPAC-1	metastasis	pancreas	NS	NS	NS	carcinoma	ductal_carcinoma	NS	NS	male		26	caucasian		Caucasian	liver		CCLE		mixed line ~ 50-50	IMDM+10%fbs	NA	5%DMSO		80.2	pancreas	pancreas	Pancreas:Carcinoma	79.9015	PAAD
NIHOVCAR3_OVARY	ACH-000001	NIH:OVCAR-3	metastasis	ovary	NS	NS	NS	carcinoma	NS	NS	NS	female		60	caucasian		Caucasian	ascites	ovarian_cancer	CCLE	ATCC	adherenet; epithelial	RPMI+20%FBS	NA	5%DMSO		NA	ovary	ovary	Ovary:Carcinoma	83.807	OV
NCIH1650_LUNG	ACH-000035	NCI-H1650	metastasis	lung	NS	NS	NS	carcinoma	bronchioloalveolar_adenocarcinoma	NS	NS	male		27	caucasian		Caucasian	pleura	lung_cancer	CCLE	ATCC	adherent; epithelial	RPMI+10%FBS	NA	5%DMSO		52.2	lung_NSC	lung_NSC	Lung:NSCLC_Adeno	60.1277	LUAD
NCIH1793_LUNG	ACH-000888	NCI-H1793	primary	lung	NS	NS	NS	carcinoma	non_small_cell_carcinoma	NS	NS	female		52			Caucasian			CCLE	ATCC	adherent; epithelial	DMEM:F12	plethora; see sheet	5% DMSO		98.1	lung_NSC	lung_NSC	Lung:NSCLC_Adeno	282.922	LUAD
NCIH1437_LUNG	ACH-000589	NCI-H1437	metastasis	lung	NS	NS	NS	carcinoma	adenocarcinoma	NS	NS	male		6	caucasian		Caucasian	pleura	lung_cancer	CCLE	ATCC	Adherent	RPMI+10%FBS	NA	5% DMSO		48.6	lung_NSC	lung_NSC	Lung:NSCLC_Adeno	126.208	LUAD
KNS62_LUNG	ACH-000858	KNS-62	metastasis	lung	bronchus	NS	NS	carcinoma	squamous_cell_carcinoma	NS	NS	male		49			Asian			CCLE	ATCC	adherent	EMEM +20%FBS	NA	5% DMSO		59.2	lung_NSC	lung_NSC	Lung:NSCLC_Squamous	223.142	LUSC
HS578T_BREAST	ACH-000148	Hs 578T	primary	breast	NS	NS	NS	carcinoma	ductal_carcinoma	NS	NS	female		74	caucasian		Caucasian		breast_cancer	CCLE	ATCC	Adherent	DMEM +10 %FBS	NA	5%DMSO		47.9	breast	breast	Breast:Carcinoma	93.3026	BRCA
BT20_BREAST	ACH-000536	BT-20	primary	breast	NS	NS	NS	carcinoma	ductal_carcinoma	NS	NS	female		74	caucasian		Caucasian		breast_cancer	CCLE	NIBRI						NA	breast	breast	Breast:Carcinoma	114.14	BRCA
SNU182_LIVER	ACH-000483	SNU-182	primary	liver	NS	NS	NS	carcinoma	hepatocellular_carcinoma	NS	NS	male		24	asian	korea	Asian		hepatocellular_cancer	CCLE	NIBRI						NA	liver	liver	Liver:HCC	140.779	LIHC
SKNMC_BONE	ACH-000039	SK-N-MC	metastasis	bone	NS	NS	NS	Ewings_sarcoma-peripheral_primitive_neuroectodermal_tumour	NS	NS	NS	female		14	caucasian		Caucasian	supra_orbital_area	neuroepithelioma	CCLE	ATCC	Adherent epithelial.	EMEM + 10% FBS	NA	5% DMSO		32.9	Ewings_Sarcoma	Ewings_sarcoma	Bone:Sarcoma_Ewing	53.2488	SARC
HH_HAEMATOPOIETIC_AND_LYMPHOID_TISSUE	ACH-000061	HH	primary	haematopoietic_and_lymphoid_tissue	NS	NS	NS	lymphoid_neoplasm	adult_T_cell_lymphoma-leukaemia	NS	NS	male		61	caucasian		Caucasian		cutaneous T cell lymphoma	CCLE	NIBRI						NA	T-cell_ALL	T-cell_ALL	Leukemia:ALL	79.6311	ALL
FADU_UPPER_AERODIGESTIVE_TRACT	ACH-000846	FaDu	primary	upper_aerodigestive_tract	pharynx	hypopharynx	NS	carcinoma	squamous_cell_carcinoma	NS	NS	male		56	caucasian		Caucasian			CCLE	NIBRI						33.3	upper_aerodigestive	upper_aerodigestive	Upper_Aerodigestive_Tract:Carcinoma	193.317	HNSC
SJRH30_SOFT_TISSUE	ACH-001189	SJRH30	metastasis	soft_tissue	striated_muscle	NS	NS	rhabdomyosarcoma	NS	NS	NS	male		17	caucasian		Caucasian	bone_marrow		CCLE	NA	NA	NA	NA	NA	NA	NA	soft_tissue	soft_tissue	NA	NA	NA
MDAMB361_BREAST	ACH-000934	MDA-MB-361	metastasis	breast	NS	NS	NS	carcinoma	NS	NS	NS	female		40	caucasian		Caucasian	central_nervous_system	breast_cancer	CCLE	ATCC	loosely adherent epithelial	RPMI-20% FBS	NA	5% DMSO		168.2	breast	breast	Breast:Carcinoma	413.992	BRCA
MDAMB436_BREAST	ACH-000573	MDA-MB-436	metastasis	breast	NS	NS	NS	carcinoma	NS	NS	NS	female		43	caucasian		Caucasian	pleura	breast_cancer	CCLE	ATCC	Adherent	RPMI-1640 + 10% FBS	10ug/ml bovine insulin; 16ug/ml glutathione	5%DMSO		58.6	breast	breast	Breast:Carcinoma	151.821	BRCA
PANC0213_PANCREAS	ACH-000031	Panc 02.13	primary	pancreas	NS	NS	NS	carcinoma	NS	NS	NS	female		64	caucasian		Caucasian			CCLE	NIBRI						NA	pancreas	pancreas	Pancreas:Carcinoma	53.8708	PAAD
DB_HAEMATOPOIETIC_AND_LYMPHOID_TISSUE	ACH-000334	DB	metastasis	haematopoietic_and_lymphoid_tissue	NS	NS	NS	lymphoid_neoplasm	diffuse_large_B_cell_lymphoma	NS	NS	male		45	caucasian		Caucasian	ascites	germinal center B-cell-like (GCB) DLBCL	CCLE	ATCC	suspension	RPMI-1640 + 10% FBS	NA	5%DMSO		52.6	lymphoma_DLBCL	lymphoma_DLBCL	Lymphoma:NH_B_cell	120.793	DLBC
RDES_BONE	ACH-000041	RD-ES	primary	bone	NS	NS	NS	Ewings_sarcoma-peripheral_primitive_neuroectodermal_tumour	NS	NS	NS	male		19	caucasian		Caucasian		Ewing family tumor	CCLE	NIBRI						NA	Ewings_Sarcoma	Ewings_sarcoma	Bone:Sarcoma_Ewing	75.2922	SARC
CAL27_UPPER_AERODIGESTIVE_TRACT	ACH-000832	CAL 27	primary	upper_aerodigestive_tract	mouth	tongue	NS	carcinoma	squamous_cell_carcinoma	NS	NS	male		56	caucasian		Caucasian			CCLE	NIBRI						29.3	upper_aerodigestive	upper_aerodigestive	Upper_Aerodigestive_Tract:Carcinoma	186.149	HNSC
MESSA_SOFT_TISSUE	ACH-000449	MES-SA	primary	soft_tissue	fibrous_tissue_and_uncertain_origin	uterus	NS	sarcoma	NS	NS	NS	female		56	caucasian		Caucasian			CCLE	ATCC	Fibroblast adherent	McCoy's 5A + 10%FBS	NA	5%DMSO		35.3	soft_tissue	soft_tissue	Soft_Tissue:Sarcoma_Others	121.318	SARC
SW1271_LUNG	ACH-000890	SW 1271	primary	lung	NS	NS	NS	carcinoma	small_cell_carcinoma	NS	NS	male		69	caucasian		Caucasian			CCLE	ATCC	adherent; epithelial	Leibovitz's L-15 Medium + 10%FBS	NA	5%DMSO		NA	lung_small_cell	lung_small_cell	Lung:SCLC	261.056	SCLC
NCIH1792_LUNG	ACH-000496	NCI-H1792	metastasis	lung	NS	NS	NS	carcinoma	adenocarcinoma	NS	NS	male		50	caucasian		Caucasian	pleura		CCLE	ATCC	adherent	RPMI+10%FBS	NA	5% DMSO		31.2	lung_NSC	lung_NSC	Lung:NSCLC_Adeno	125.087	LUAD
GCT_SOFT_TISSUE	ACH-000835	GCT	metastasis	soft_tissue	fibrous_tissue_and_uncertain_origin	NS	NS	malignant_fibrous_histiocytoma-pleomorphic_sarcoma	NS	NS	NS	male		29			Caucasian	lung		CCLE	NIBRI						64.6	soft_tissue	soft_tissue	Soft_Tissue:Sarcoma_FibrousHistiocytoma	179.491	SARC
SKBR3_BREAST	ACH-000017	SK-BR-3	metastasis	breast	NS	NS	NS	carcinoma	NS	NS	NS	female		43	caucasian		Caucasian	pleura	breast_cancer	CCLE	NIBRI						95.3	breast	breast	Breast:Carcinoma	170.582	BRCA
SNU16_STOMACH	ACH-000581	SNU-16	metastasis	stomach	NS	NS	NS	carcinoma	undifferentiated_adenocarcinoma	NS	NS	female		33	asian		Asian	ascites		CCLE	NIBRI						NA	stomach	stomach	Gastric:Carcinoma	154.398	STAD
NCIH82_LUNG	ACH-000355	NCI-H82	metastasis	lung	NS	NS	NS	carcinoma	small_cell_carcinoma	NS	NS	male		41	caucasian		Caucasian	pleura		CCLE	ATCC	adherent; epithelial	RPMI+10%FBS	NA	5% DMSO		21.6	lung_small_cell	lung_small_cell	Lung:SCLC	108.505	SCLC
NCIN87_STOMACH	ACH-000427	NCI-N87	metastasis	stomach	NS	NS	NS	carcinoma	NS	NS	NS	male		NA			African_american	liver		CCLE		Epithelial adherent	RPMI1640+10%FBS	NA	5%DMSO		76.7	stomach	stomach	Gastric:Carcinoma	111.339	STAD
U2OS_BONE	ACH-000364	U-2 OS	primary	bone	NS	NS	NS	osteosarcoma	NS	NS	NS	female		15	caucasian		Caucasian		bone_cancer	CCLE	ATCC	Adherent	McCoy's 5A +10%FBS	NA	5% DMSO		NA	osteosarcoma	osteosarcoma	Bone:Sarcoma_Osteo	103.691	SARC
H4_CENTRAL_NERVOUS_SYSTEM	ACH-000389	H4	primary	central_nervous_system	NS	NS	NS	glioma	NS	NS	NS	male		37	caucasian		Caucasian			CCLE	NIBRI						35.6	glioma	glioma	CNS:Glioma	108.479	LGG
GDM1_HAEMATOPOIETIC_AND_LYMPHOID_TISSUE	ACH-000081	GDM-1	primary	haematopoietic_and_lymphoid_tissue	NS	NS	NS	haematopoietic_neoplasm	acute_myeloid_leukaemia	M4	NS	female		66	caucasian		Caucasian			CCLE	NIBRI						NA	AML	AML	Leukemia:AML	83.7208	LAML
HCC1143_BREAST	ACH-000374	HCC1143	primary	breast	NS	NS	NS	carcinoma	ductal_carcinoma	NS	NS	female		52	caucasian		Caucasian		breast_cancer	CCLE	ATCC	Adherent	RPMI+10%FBS	NA	5%DMSO		214.2	breast	breast	Breast:Carcinoma	113.652	BRCA
T24_URINARY_TRACT	ACH-000018	T24	primary	urinary_tract	bladder	NS	NS	carcinoma	transitional_cell_carcinoma	NS	NS	female		81	caucasian		Caucasian		transitional_cell_carcinoma	CCLE	ATCC	Adherent epithelial	McCoy's 5A +10%	NA	5%DMSO		38.8	urinary_tract	urinary_tract	Bladder:Carcinoma	94.6753	BLCA
G401_SOFT_TISSUE	ACH-000096	G-401	primary	soft_tissue	striated_muscle	kidney	NS	rhabdoid_tumour	NS	NS	NS	male		0.25	caucasian		Caucasian		rhabdoid_tumour	CCLE	NIBRI						NA	soft_tissue	soft_tissue	Soft_Tissue:Sarcoma_Rhabdoid	90.2697	SARC
HCC1937_BREAST	ACH-000223	HCC1937	primary	breast	NS	NS	NS	carcinoma	ductal_carcinoma	NS	NS	female		24	caucasian		Caucasian		ductal_carcinoma	CCLE	ATCC	adherent; line grows as large epithelial cells with tendency to float at high cell densitites	RPMI-1640+10% FBS	NA	5%DMSO		88.8	breast	breast	Breast:Carcinoma	82.859	BRCA
HCC1569_BREAST	ACH-000930	HCC1569	primary	breast	NS	NS	NS	carcinoma	metaplastic_carcinoma	NS	NS	female		70	african_american		African_american		metaplastic_breast_carcinoma	CCLE		mixed	RPMI1640+10%FBS	NA	5%DMSO		NA	breast	breast	Breast:Carcinoma	486.867	BRCA
OCUM1_STOMACH	ACH-000247	OCUM-1	primary	stomach	NS	NS	NS	carcinoma	diffuse_adenocarcinoma	NS	NS	female		38	asian	japan	Asian			CCLE	NIBRI						NA	stomach	stomach	Gastric:Carcinoma	133.868	STAD
SAOS2_BONE	ACH-000410	Saos-2	primary	bone	NS	NS	NS	osteosarcoma	NS	NS	NS	female		11	caucasian		Caucasian		osteosarcoma	CCLE	NIBRI	Adherent epithelial	McCoy's 5A +15%FBS	NA	5%DMSO		181.8	osteosarcoma	osteosarcoma	Bone:Sarcoma_Osteo	109.36	SARC
D283MED_CENTRAL_NERVOUS_SYSTEM	ACH-000055	D283 Med	metastasis	central_nervous_system	cerebellum	NS	NS	primitive_neuroectodermal_tumour-medulloblastoma	NS	NS	NS	male		6	caucasian		Caucasian	peritoneum		CCLE	NIBRI						243.4	medulloblastoma	medulloblastoma	CNS:Medulloblastoma	85.4818	MB
SCC9_UPPER_AERODIGESTIVE_TRACT	ACH-000181	SCC-9	primary	upper_aerodigestive_tract	mouth	tongue	NS	carcinoma	squamous_cell_carcinoma	NS	NS	male		25			Caucasian		head_neck_cancer	CCLE	NIBRI						NA	upper_aerodigestive	upper_aerodigestive	Upper_Aerodigestive_Tract:Carcinoma	80.6695	HNSC
HCC1395_BREAST	ACH-000699	HCC1395	primary	breast	NS	NS	NS	carcinoma	ductal_carcinoma	NS	NS	female		43	caucasian		Caucasian			CCLE	ATCC	ADHERENT EPITHELIAL	RPMI-10% FBS	NA	5% DMSO		107.3	breast	breast	Breast:Carcinoma	131.152	BRCA
NMCG1_CENTRAL_NERVOUS_SYSTEM	ACH-000200	NMC-G1	primary	central_nervous_system	brain	NS	NS	glioma	NS	NS	NS			NA			Asian			CCLE	HSSRB	Adherent	DMEM +10%FBS	NA	5% DMSO		137.9	glioma	glioma	CNS:Glioma	99.4297	LGG
TEN_ENDOMETRIUM	ACH-000397	TEN	primary	endometrium	NS	NS	NS	carcinoma	clear_cell_carcinoma	NS	NS	female		74	asian		Asian		Endometrial Cancer	CCLE	RIKEN		MEM + 10% FBS	NA	5%DMSO		178.9	endometrium	endometrium	Endometrium:Carcinoma	147.154	UCEC
HS604T_FIBROBLAST	ACH-001093	Hs 604.T	primary	haematopoietic_and_lymphoid_tissue	NS	NS	NS	lymphoid_neoplasm	Hodgkin_lymphoma	NS	NS	male		21	caucasian		Caucasian			CCLE	ATCC	Adherent	DMEM +10 %FBS	NA	5%DMSO		NA	lymphoma_Hodgkin	fibroblast_like	NA	NA	NA
TE9_OESOPHAGUS	ACH-000694	TE-9	primary	oesophagus	NS	NS	NS	carcinoma	squamous_cell_carcinoma	NS	NS	male		NA			Asian			CCLE	RIKEN	Adherent	RPMI 1640 + 10%FBS		5% DMSO		106.5	esophagus	esophagus	Oesophagus:Carcinoma	161.031	ESCA
KNS42_CENTRAL_NERVOUS_SYSTEM	ACH-000622	KNS-42	primary	central_nervous_system	brain	NS	NS	glioma	NS	NS	NS	male		16			Asian			CCLE	HSSRB	Adherent	EMEM + 5% FBS	NA	5% DMSO		79.7	glioma	glioma	CNS:Glioma	168.92	LGG
KYSE520_OESOPHAGUS	ACH-000637	KYSE-520	primary	oesophagus	lower_third	NS	NS	carcinoma	squamous_cell_carcinoma	NS	NS	female		58	asian	japan	Asian			CCLE	DSMZ	Adherent	RPMI 1640 +10%FBS	NA	5% DMSO		121.8	esophagus	esophagus	Oesophagus:Carcinoma	168.914	ESCA
KYSE270_OESOPHAGUS	ACH-000873	KYSE-270	primary	oesophagus	middle_third	NS	NS	carcinoma	squamous_cell_carcinoma	NS	NS	male		79	asian	japan	Asian			CCLE	DSMZ	Adherent	RPMI + 10 % FBS	NA	5% DMSO		153.6	esophagus	esophagus	Oesophagus:Carcinoma	245.38	ESCA
JHUEM1_ENDOMETRIUM	ACH-000928	JHUEM-1	primary	endometrium	NS	NS	NS	carcinoma	adenocarcinoma	NS	NS	female		56	asian	japan	Asian		Endometrial Cancer	CCLE	RIKEN	adherent with some suspension cells	DMEM:F12(1:1) +15%FBS	NA	5% DMSO		288.6	endometrium	endometrium	Endometrium:Carcinoma	434.99	UCEC
YH13_CENTRAL_NERVOUS_SYSTEM	ACH-000469	YH-13	primary	central_nervous_system	brain	NS	NS	glioma	astrocytoma_Grade_IV	glioblastoma_multiforme	NS	male		40			Asian			CCLE	HSSRB	Adherent	EMEM + 20% FBS	NA	5% DMSO		77.1	glioma	glioma	CNS:Glioma_HighGrade	159.433	GBM
IALM_LUNG	ACH-000672	IA-LM	metastasis	lung	NS	NS	NS	carcinoma	large_cell_carcinoma	NS	NS	male		68	asian	japan	Asian	skin		CCLE	RIKEN	ADHERENT EPITHELIAL;	HAMSF10+ 10% FBS	NA	5% DMSO		143.2	lung_NSC	lung_NSC	Lung:NSCLC_Large_Cell	196.595	NA
NCIH2052_PLEURA	ACH-000153	NCI-H2052	metastasis	pleura	NS	NS	NS	mesothelioma	NS	NS	NS	male		65	caucasian		Caucasian	pleura		CCLE	ATCC	adherent	RPMI-1640 +10 % FBS	NA	5% DMSO		194.2	mesothelioma	mesothelioma	Lung:Mesothelioma	89.7589	MESO
EB2_HAEMATOPOIETIC_AND_LYMPHOID_TISSUE	ACH-001064	EB2	metastasis	haematopoietic_and_lymphoid_tissue	NS	NS	NS	lymphoid_neoplasm	Burkitt_lymphoma	NS	NS	female		7	african_american		African_american	ovary		CCLE	NA	NA	NA	NA	NA	NA	NA	lymphoma_Burkitt	lymphoma_Burkitt	NA	NA	NA
SKNFI_AUTONOMIC_GANGLIA	ACH-000341	SK-N-FI	metastasis	autonomic_ganglia	NS	NS	NS	neuroblastoma	NS	NS	NS	male		11	caucasian		Caucasian	bone_marrow	neuroblastoma	CCLE	NIBRI						NA	neuroblastoma	neuroblastoma	PNET:Neuroblastoma	112.136	NB
SKNAS_AUTONOMIC_GANGLIA	ACH-000260	SK-N-AS	primary	autonomic_ganglia	NS	NS	NS	neuroblastoma	NS	NS	NS	female		6	caucasian		Caucasian		neuroblastoma	CCLE	ATCC	Adherent	DMEM + 10% FBS	0.1mM NEAA	5%DMSO		55.9	neuroblastoma	neuroblastoma	PNET:Neuroblastoma	93.7657	NB
GA10_HAEMATOPOIETIC_AND_LYMPHOID_TISSUE	ACH-000162	GA-10	primary	haematopoietic_and_lymphoid_tissue	NS	NS	NS	lymphoid_neoplasm	Burkitt_lymphoma	NS	NS	male		41	caucasian		Caucasian			CCLE	ATCC	suspension, lymphoblast	RPMI-1640 + 10% FBS	NA	5%DMSO		51.6	lymphoma_Burkitt	lymphoma_Burkitt	Lymphoma:NH_B_cell	91.7044	DLBC
SNU398_LIVER	ACH-000221	SNU-398	primary	liver	NS	NS	NS	carcinoma	hepatocellular_carcinoma	NS	NS	male		42	asian	korea	Asian			CCLE	NIBRI						NA	liver	liver	Liver:HCC	127.24	LIHC
SNU423_LIVER	ACH-000493	SNU-423	primary	liver	NS	NS	NS	carcinoma	hepatocellular_carcinoma	NS	NS	male		40	asian	korea	Asian		pleomorphic hepatocellular carcinoma	CCLE	NIBRI						NA	liver	liver	Liver:HCC	141.308	LIHC
SCC4_UPPER_AERODIGESTIVE_TRACT	ACH-000238	SCC-4	primary	upper_aerodigestive_tract	mouth	tongue	NS	carcinoma	squamous_cell_carcinoma	NS	NS	male		55			Caucasian			CCLE	NIBRI						NA	upper_aerodigestive	upper_aerodigestive	Upper_Aerodigestive_Tract:Carcinoma	97.4509	HNSC
EB1_HAEMATOPOIETIC_AND_LYMPHOID_TISSUE	ACH-000877	EB1	primary	haematopoietic_and_lymphoid_tissue	head_neck	NS	NS	lymphoid_neoplasm	Burkitt_lymphoma	NS	NS	female		9	african_american		African_american			CCLE	ATCC	suspension	RPMI + 10 % FBS	NA	5% DMSO		89.8	lymphoma_Burkitt	lymphoma_Burkitt	Lymphoma:NH_B_cell	210.501	DLBC
HCC1187_BREAST	ACH-000111	HCC1187	primary	breast	NS	NS	NS	carcinoma	ductal_carcinoma	NS	NS	female		41	caucasian		Caucasian		ductal_carcinoma	CCLE	ATCC	Epithelial; mixed adherent and suspension	RPMI-1640+10% FBS	NA	5%DMSO		66	breast	breast	Breast:Carcinoma	82.862	BRCA
SNU387_LIVER	ACH-000478	SNU-387	primary	liver	NS	NS	NS	carcinoma	hepatocellular_carcinoma	NS	NS	female		41	asian	korea	Asian			CCLE	ATCC	adherent epithelial	RPMI-1640 + 10% FBS	NA	5%DMSO		87	liver	liver	Liver:HCC	144.232	LIHC
DAUDI_HAEMATOPOIETIC_AND_LYMPHOID_TISSUE	ACH-000786	Daudi	primary	haematopoietic_and_lymphoid_tissue	NS	NS	NS	lymphoid_neoplasm	Burkitt_lymphoma	NS	NS	male		16	african		African_american		lymphoma	CCLE	NIBRI						NA	lymphoma_Burkitt	lymphoma_Burkitt	Lymphoma:NH_B_cell	172.334	DLBC
HT_HAEMATOPOIETIC_AND_LYMPHOID_TISSUE	ACH-000914	HT	metastasis	haematopoietic_and_lymphoid_tissue	NS	NS	NS	lymphoid_neoplasm	B_cell_lymphoma_unspecified	NS	NS	male		70	caucasian		Caucasian	pleura		CCLE	NIBRI						NA	lymphoma_other	B-cell_lymphoma_other	Lymphoma:NH_B_cell	442.937	DLBC
MJ_HAEMATOPOIETIC_AND_LYMPHOID_TISSUE	ACH-000077	MJ	primary	haematopoietic_and_lymphoid_tissue	skin	NS	NS	lymphoid_neoplasm	mycosis_fungoides-Sezary_syndrome	NS	NS	male		50	caucasian		Caucasian			CCLE	NIBRI						NA	lymphoma_other	T-cell_lymphoma_other	Lymphoma:NH_T_cell	83.3453	NA
JM1_HAEMATOPOIETIC_AND_LYMPHOID_TISSUE	ACH-000151	JM1	primary	haematopoietic_and_lymphoid_tissue	NS	NS	NS	lymphoid_neoplasm	B_cell_lymphoma_unspecified	NS	NS			NA			Caucasian			CCLE	NIBRI						NA	lymphoma_other	B-cell_ALL	Lymphoma:NH_B_cell	101.667	DLBC
C2BBE1_LARGE_INTESTINE	ACH-000009	C2BBe1	primary	large_intestine	colon	NS	NS	carcinoma	adenocarcinoma	NS	NS	male		72	caucasian		Caucasian			CCLE	ATCC	Adherent	DMEM +10%FBS	NA	5% DMSO		110.9	colorectal	colorectal	Colorectal:Carcinoma	115.886	COAD/READ
SKES1_BONE	ACH-000087	SK-ES-1	primary	bone	NS	NS	NS	Ewings_sarcoma-peripheral_primitive_neuroectodermal_tumour	NS	NS	NS	male		18	caucasian		Caucasian		Ewing family tumor	CCLE	NIBRI						NA	Ewings_Sarcoma	Ewings_sarcoma	Bone:Sarcoma_Ewing	72.5579	SARC
EPLC272H_LUNG	ACH-000585	EPLC-272H	primary	lung	NS	NS	NS	carcinoma	squamous_cell_carcinoma	NS	NS	male		57	caucasian		Caucasian			CCLE	DSMZ		RPMI-1640+20% FBS	NA	5%DMSO		79.1	lung_NSC	lung_NSC	Lung:NSCLC_Squamous	144.851	LUSC
BXPC3_PANCREAS	ACH-000535	BxPC-3	primary	pancreas	NS	NS	NS	carcinoma	ductal_carcinoma	NS	NS	female		61			Caucasian			CCLE	NIBRI						NA	pancreas	pancreas	Pancreas:Carcinoma	127.641	PAAD
NCIH1355_LUNG	ACH-000666	NCI-H1355	metastasis	lung	NS	NS	NS	carcinoma	adenocarcinoma	NS	NS	male		53	caucasian		Caucasian	pleura		CCLE	ATCC	Adherent	DMEM/F12(1:1) +10 % FBS	.02 mg/ml insulin, .01 mg/ml transferrin, 25nM sodium selenite, 50 nM hydrocortisone, 2 mM L-glutamine, 0.5 sodium pyruvate, 1ng/mL EGF	5% DMSO		157.4	lung_NSC	lung_NSC	Lung:NSCLC_Adeno	137.171	LUAD
SNU5_STOMACH	ACH-000303	SNU-5	metastasis	stomach	NS	NS	NS	carcinoma	undifferentiated_adenocarcinoma	NS	NS	female		33	asian		Asian	ascites		CCLE	NIBRI						NA	stomach	stomach	Gastric:Carcinoma	147.816	STAD
SNU475_LIVER	ACH-000422	SNU-475	primary	liver	NS	NS	NS	carcinoma	hepatocellular_carcinoma	NS	NS	male		43	asian	korea	Asian		hepatocellular_cancer	CCLE	NIBRI						NA	liver	liver	Liver:HCC	142.424	LIHC
HEC251_ENDOMETRIUM	ACH-000996	HEC-251	primary	endometrium	NS	NS	NS	carcinoma	adenocarcinoma	NS	NS	female		NA	asian	japan	Asian		Endometrial Cancer	CCLE	HSSRB	epithelial-like	Eagle's minimal essential medium with 15% fetal bovine serum	NA		Na	NA	endometrium	endometrium	Endometrium:Carcinoma	1999.29	UCEC
HCC95_LUNG	ACH-000454	HCC-95	primary	lung	NS	NS	NS	carcinoma	squamous_cell_carcinoma	NS	NS	male		65	caucasian		Caucasian		lung_cancer	CCLE	KCLB	epithelial; monolayer	RPMI 1640 with L-glutamine (300mg/L), 90%; heat inactivated fetal bovine serum (FBS),10%	25mM Hepes and 25mM NaHCo3		NA	NA	lung_NSC	lung_NSC	Lung:NSCLC_Squamous	115.389	LUSC
253J_URINARY_TRACT	ACH-000011	253J	primary	urinary_tract	bladder	NS	NS	carcinoma	transitional_cell_carcinoma	NS	NS			NA			Caucasian			CCLE	KCLB	monolayer	Eagle	NA		NA	NA	urinary_tract	urinary_tract	Bladder:Carcinoma	137.857	BLCA
HCC1438_LUNG	ACH-000891	HCC-1438	primary	lung	NS	NS	NS	carcinoma	large_cell_carcinoma	NS	NS	male		43			African_american			CCLE	KCLB	epithelial; monolayer	RPMI 1640 with L-glutamine (300mg/L), 90%; heat inactivated fetal bovine serum (FBS),10%	25mM Hepes and 25mM NaHCo3		NA	NA	lung_NSC	lung_NSC	Lung:NSCLC_Large_Cell	270.832	NA
253JBV_URINARY_TRACT	ACH-000026	253J-BV	primary	urinary_tract	bladder	NS	NS	carcinoma	transitional_cell_carcinoma	NS	NS			NA			Caucasian			CCLE		Adherent epithelial	DMEM + 10% FBS	NA	5%DMSO		NA	urinary_tract	urinary_tract	Bladder:Carcinoma	145.666	BLCA
RPMI7951_SKIN	ACH-000348	RPMI-7951	metastasis	skin	NS	NS	NS	malignant_melanoma	NS	NS	NS	female		18	caucasian		Caucasian	lymph_node	melanoma	CCLE	ATCC	EPITHELIAL, ADHERENT	EMEM+10%FBS	NA	5%DMSO		52.9	melanoma	melanoma	Skin:Melanoma	98.6856	SKCM
SNU1066_UPPER_AERODIGESTIVE_TRACT	ACH-000682	SNU-1066	primary	upper_aerodigestive_tract	larynx	glottis	NS	carcinoma	squamous_cell_carcinoma	NS	NS	male		62	asian		Asian			CCLE	KCLB	epithelial; monolayer	RPMI 1640 with L-glutamine (300mg/L), 90%; heat inactivated fetal bovine serum (FBS),10%	25mM Hepes and 25mM NaHCo3		48 hrs	NA	upper_aerodigestive	upper_aerodigestive	Upper_Aerodigestive_Tract:Carcinoma	151.352	HNSC
SNU1041_UPPER_AERODIGESTIVE_TRACT	ACH-000618	SNU-1041	primary	upper_aerodigestive_tract	pharynx	NS	NS	carcinoma	NS	NS	NS			NA			Asian			CCLE	KCLB	epithelial; monolayer	RPMI 1640 with L-glutamine (300mg/L), 90%; heat inactivated fetal bovine serum (FBS),10%	25mM Hepes and 25mM NaHCo3		NA	NA	upper_aerodigestive	upper_aerodigestive	Upper_Aerodigestive_Tract:Carcinoma	148.173	HNSC
HCC2108_LUNG	ACH-000314	HCC-2108	primary	lung	NS	NS	NS	carcinoma	adenocarcinoma	NS	NS	male		59			Caucasian			CCLE	KCLB	Epithelial Monolayer	RPMI+10%FBS	NA	5-7.5%DMSO		62.3	lung_NSC	lung_NSC	Lung:NSCLC_Adeno	107.623	LUAD
COLO783_SKIN	ACH-000812	COLO-783	metastasis	skin	NS	NS	NS	malignant_melanoma	NS	NS	NS	female		48			Caucasian	lymph_node		CCLE	DSMZ	ADHERENT FIBROBLASTS, NOT LIMITED TO MONOLAYER GROWTH	RPMI-1640+10% FBS	NA	5%DMSO	5-7 DAYS	110.4	melanoma	melanoma	Skin:Melanoma	163.603	SKCM
HCC1359_LUNG	ACH-000901	HCC-1359	primary	lung	NS	NS	NS	carcinoma	large_cell_carcinoma	NS	NS	female		55	african_american		African_american		lung_cancer	CCLE	KCLB	ADHERENT, EPITHELIAL MONOLAYER	RPMI-1640+10% FBS	NA	5%DMSO		42.1	lung_NSC	lung_NSC	Lung:NSCLC_Large_Cell	273.612	NA
BICR31_UPPER_AERODIGESTIVE_TRACT	ACH-000228	BICR 31	primary	upper_aerodigestive_tract	mouth	tongue	NS	carcinoma	squamous_cell_carcinoma	NS	NS	male		NA	caucasian		Caucasian			CCLE	ECACC	adherent; epithelial, keratinocyte	DMEM+20% FBS	2mM L-glutamine, 0.4ug/ml hydrocortisone	5%DMSO		77.7	upper_aerodigestive	upper_aerodigestive	Upper_Aerodigestive_Tract:Carcinoma	90.8515	HNSC
COV362_OVARY	ACH-000278	COV362	primary	ovary	NS	NS	NS	carcinoma	NS	NS	NS	female		NA			Caucasian			CCLE	ECACC	adherent, polygonal & fusiform	DMEM+10% FBS	2mM L-glutamine	5%DMSO		77	ovary	ovary	Ovary:Carcinoma	107.932	OV
COLO792_SKIN	ACH-000968	COLO 792	metastasis	skin	NS	NS	NS	malignant_melanoma	NS	NS	NS	male		62			Caucasian	brain		CCLE	ECACC	Epithelial adherent	RPMI+10%FBS	2Mm L-Glutamine	?		155.8	melanoma	melanoma	Skin:Melanoma	587.578	SKCM
COV434_OVARY	ACH-000123	COV434	primary	ovary	NS	NS	NS	sex_cord-stromal_tumour	granulosa_cell_tumour	NS	NS	female		NA			Caucasian			CCLE	ECACC						NA	ovary	ovary	Ovary:Germline	88.9509	OV
WM983B_SKIN	ACH-000765	WM-983B	primary	skin	NS	NS	NS	malignant_melanoma	NS	NS	NS			NA			Caucasian			CCLE	GNF						NA	melanoma	melanoma	Skin:Melanoma	173.512	SKCM
HS751T_FIBROBLAST	ACH-000165	Hs 751.T	primary	haematopoietic_and_lymphoid_tissue	lymph_node	NS	NS	lymphoid_neoplasm	Hodgkin_lymphoma	NS	NS			NA			Caucasian			CCLE	GNF						NA	lymphoma_Hodgkin	fibroblast_like	NA	NA	NA
LS513_LARGE_INTESTINE	ACH-000007	LS513	primary	large_intestine	caecum	NS	NS	carcinoma	adenocarcinoma	NS	NS	male		63	caucasian		Caucasian			CCLE	NA	NA	NA	NA	NA	NA	NA	colorectal	colorectal	Colorectal:Carcinoma	112.35	COAD/READ
NCIH2110_LUNG	ACH-000929	NCI-H2110	metastasis	lung	NS	NS	NS	carcinoma	non_small_cell_carcinoma	NS	NS			NA			African_american	pleura		CCLE	GNF						NA	lung_NSC	lung_NSC	Lung:NSCLC_Others	405.949	UNABLE TO CLASSIFY
CHAGOK1_LUNG	ACH-000867	ChaGo-K-1	primary	lung	NS	NS	NS	carcinoma	NS	NS	NS	male		45			Caucasian			CCLE	ECACC						NA	lung_NSC	lung_NSC	Lung:Others	225.758	UNABLE TO CLASSIFY
DMS454_LUNG	ACH-000844	DMS 454	primary	lung	NS	NS	NS	carcinoma	small_cell_carcinoma	NS	NS	male		NA			Caucasian			CCLE	ECACC	Adherent	Waymouth's +10%FBS	2mM GLUTAMINE	5%DMSO		121.8	lung_small_cell	lung_small_cell	Lung:SCLC	210.198	SCLC
CORL47_LUNG	ACH-000695	COR-L47	primary	lung	NS	NS	NS	carcinoma	small_cell_carcinoma	NS	NS	male		67	caucasian		Caucasian			CCLE	ECACC	aggregates in suspension	RPI-1640+10% FBS	2mM L-glutamine	5% DMSO		77.5	lung_small_cell	lung_small_cell	Lung:SCLC	154.597	SCLC
FTC238_THYROID	ACH-000897	FTC-238	metastasis	thyroid	NS	NS	NS	carcinoma	follicular_carcinoma	NS	NS	male		42			Caucasian			CCLE	ECACC	ADHERENT	DMEM:F12 (1:1)+5%FBS	2mM L-GLUTAMINE	5% DMSO		59	thyroid	thyroid	Thyroid:Carcinoma	326.734	THCA
DMS273_LUNG	ACH-000749	DMS 273	metastasis	lung	NS	NS	NS	carcinoma	small_cell_carcinoma	NS	NS	female		50			Caucasian	pleura		CCLE	ECACC						NA	lung_small_cell	lung_small_cell	Lung:SCLC	161.668	SCLC
FTC133_THYROID	ACH-000903	FTC-133	metastasis	thyroid	NS	NS	NS	carcinoma	follicular_carcinoma	NS	NS	male		42			Caucasian	lymph_node		CCLE	ECACC	ADHERENT	DMEM:F12+10% FBS	2mM L-GLUTAMINE	5%DMSO		52	thyroid	thyroid	Thyroid:Carcinoma	371.353	THCA
CORL311_LUNG	ACH-000187	COR-L311	primary	lung	NS	NS	NS	carcinoma	small_cell_carcinoma	NS	NS	male		63			Caucasian			CCLE	ECACC	Large irregular aggregates, difficult to count	RPMI+10%FBS	2Mm L-Glutamine	?		112.1	lung_small_cell	lung_small_cell	Lung:SCLC	100.251	SCLC
NCIH2286_LUNG	ACH-000912	NCI-H2286	primary	lung	NS	NS	NS	carcinoma	small_cell_carcinoma	NS	NS	female		57	caucasian		Caucasian			CCLE							77.8	lung_small_cell	lung_small_cell	Lung:SCLC	316.771	SCLC
NCIH1339_LUNG	ACH-000921	NCI-H1339	metastasis	lung	NS	NS	NS	carcinoma	small_cell_carcinoma	NS	NS	female		49	caucasian		African_american	pleura		CCLE	ATCC	Adherent	RPMI+20%FBS		5%DMSO		83.3	lung_small_cell	lung_small_cell	Lung:SCLC	346.135	SCLC
WM793_SKIN	ACH-000827	WM-793	primary	skin	NS	NS	NS	malignant_melanoma	NS	NS	NS			NA			Caucasian			CCLE	WISTAR	Adherent	RPMI-1640 + 10% FBS	NA	5%DMSO		37.7	melanoma	melanoma	Skin:Melanoma	205.724	SKCM
A704_KIDNEY	ACH-000429	A-704	primary	kidney	NS	NS	NS	carcinoma	renal_cell_carcinoma	NS	NS	male		78			African_american		kidney_cancer	CCLE	GNF		MEM+10% FBS	NA	5% DMSO		NA	kidney	kidney	Kidney:Carcinoma	114.89	KIRC
MDAMB435S_SKIN	ACH-000884	MDA-MB-435S	primary	skin	NS	NS	NS	malignant_melanoma	NS	NS	NS	female		31	caucasian		Caucasian		melanoma	CCLE	ATCC		RPMI-1640+10% FBS	NA	5% DMSO		42	melanoma	melanoma	Skin:Melanoma	237.863	SKCM
WM1799_SKIN	ACH-000661	WM1799	primary	skin	NS	NS	NS	malignant_melanoma	NS	NS	NS			NA			Caucasian			CCLE	WISTAR	Adherent	RPMI-1640 + 10% FBS	NA	5%DMSO		50.3	melanoma	melanoma	Skin:Melanoma	134.458	SKCM
MEWO_SKIN	ACH-000987	MeWo	metastasis	skin	NS	NS	NS	malignant_melanoma	NS	NS	NS	male		78	caucasian		Caucasian	lymph_node		CCLE	GNF						NA	melanoma	melanoma	Skin:Melanoma	1032.47	SKCM
WM88_SKIN	ACH-000899	WM-88	primary	skin	NS	NS	NS	malignant_melanoma	NS	NS	NS			NA			Caucasian			CCLE	GNF						NA	melanoma	melanoma	Skin:Melanoma	258.851	SKCM
NCIH2081_LUNG	ACH-000394	NCI-H2081	metastasis	lung	NS	NS	NS	carcinoma	small_cell_carcinoma	NS	NS	female		59	caucasian		Caucasian	pleura		CCLE	NIBRI						NA	lung_small_cell	lung_small_cell	Lung:SCLC	111.399	SCLC
HS255T_FIBROBLAST	ACH-000199	Hs 255.T	primary	large_intestine	colon	NS	NS	carcinoma	adenocarcinoma	NS	NS	female		46	caucasian		Caucasian			CCLE	NIBRI						NA	colorectal	fibroblast_like	NA	123.701	NA
NCIH1092_LUNG	ACH-000514	NCI-H1092	metastasis	lung	NS	NS	NS	carcinoma	small_cell_carcinoma	NS	NS	male		67	caucasian		Caucasian	bone_marrow		CCLE	ATCC	Suspension	RPMI-1640 + 5% FBS	5ug/ml insulin, 10ug/ml transferrin, 3.0x10^-8 M Na Selenite (added 5ml Insulin-Transferrin-Selenium); 1.0x10^-8 M Hydrocortisone, 1.0x10^-8 beta estradiol, 2mM L-glutamine, 10mM HEPES	5%DMSO		107.4	lung_small_cell	lung_small_cell	Lung:SCLC	122.759	SCLC
SW837_LARGE_INTESTINE	ACH-000421	SW837	primary	large_intestine	rectum	NS	NS	carcinoma	adenocarcinoma	NS	NS	male		53	caucasian		Caucasian			CCLE	ATCC	Epithelial Adherent	RPMI1640+10%FBS	NA	5%DMSO		38	colorectal	colorectal	Colorectal:Carcinoma	98.9441	COAD/READ
JHH6_LIVER	ACH-000217	JHH-6	primary	liver	NS	NS	NS	carcinoma	hepatocellular_carcinoma	NS	NS	female		57	asian	japan	Asian			CCLE	HSRRB	Adherent	Williams E Medium + 10%FBS	NA	5%DMSO		156.8	liver	liver	Liver:HCC	145.275	LIHC
IGR1_SKIN	ACH-000882	IGR-1	metastasis	skin	NS	NS	NS	malignant_melanoma	NS	NS	NS	male		42			Caucasian	lymph_node		CCLE		Epithelial adherent	DMEM + 10% FBS	NA	5%DMSO		46.3	melanoma	melanoma	Skin:Melanoma	250.688	SKCM
NCIH1105_LUNG	ACH-000780	NCI-H1105	metastasis	lung	NS	NS	NS	carcinoma	small_cell_carcinoma	NS	NS	male		73	caucasian		Caucasian	lymph_node		CCLE	ATCC	Suspension	RPMI-1640 + 5% FBS	5ug/ml insulin, 10ug/ml transferrin, 3.0x10^-8 M Na Selenite (added 5ml Insulin-Transferrin-Selenium); 1.0x10^-8 M Hydrocortisone, 1.0x10^-8 beta estradiol, 2mM L-glutamine, 10mM HEPES	5%DMSO		261.8	lung_small_cell	lung_small_cell	Lung:SCLC	168.875	SCLC
NCIH1436_LUNG	ACH-000830	NCI-H1436	metastasis	lung	NS	NS	NS	carcinoma	small_cell_carcinoma	NS	NS	male		39	caucasian		Caucasian	lymph_node		CCLE	ATCC	suspension	DMEM:F12(1:1) + 10%FBS	0.005 mg/mL insulin, 0.01 mg/mL transferrin, 30nM sodium selenite, 2mM L-glutamine	5% DMSO		56.2	lung_small_cell	lung_small_cell	Lung:SCLC	199.577	SCLC
NCIH1876_LUNG	ACH-000586	NCI-H1876	metastasis	lung	NS	NS	NS	carcinoma	small_cell_carcinoma	NS	NS	male		59	caucasian		Caucasian	lymph_node		CCLE	ATCC	Adherent epithelial	DMEM:HAM's F12 1:1 +10% FBS	5ug/ml insulin, 10ug/ml transferrin, 3.0x10^-8 M Na Selenite (added 5ml Insulin-Transferrin-Selenium); 1.0x10^-8 M Hydrocortisone, 1.0x10^-8 beta estradiol, 2mM L-glutamine, 10mM HEPES	5%DMSO		72.5	lung_small_cell	lung_small_cell	Lung:SCLC	136.009	SCLC
CORL24_LUNG	ACH-000382	COR-L24	primary	lung	NS	NS	NS	carcinoma	small_cell_carcinoma	NS	NS	male		71			Caucasian			CCLE	ECACC	Aggregates in suspension	RPMI+10%FBS	2Mm L-Glutamine	?		139.2	lung_small_cell	lung_small_cell	Lung:SCLC	116.951	SCLC
COV644_OVARY	ACH-000608	COV644	primary	ovary	NS	NS	NS	carcinoma	NS	NS	NS	female		NA			Caucasian			CCLE	ECACC	Adherent polygonal and fusiform	DMEM+10%FBS	2mM L-Glutamine	?		190	ovary	ovary	Ovary:Carcinoma	94.6799	OV
GP2D_LARGE_INTESTINE	ACH-000982	GP2d	primary	large_intestine	colon	NS	NS	carcinoma	adenocarcinoma	NS	NS	female		71			Caucasian			CCLE	ECACC	Epithelial adherent	DMEM+10%FBS	2Mm L-Glutamine	?		77.1	colorectal	colorectal	Colorectal:Carcinoma	953.915	COAD/READ
PECAPJ15_UPPER_AERODIGESTIVE_TRACT	ACH-000619	PE/CA-PJ15	primary	upper_aerodigestive_tract	mouth	tongue	NS	carcinoma	squamous_cell_carcinoma	NS	NS	male		45			Caucasian			CCLE	ECACC						NA	upper_aerodigestive	upper_aerodigestive	Upper_Aerodigestive_Tract:Carcinoma	142.304	HNSC
CORL88_LUNG	ACH-000508	COR-L88	primary	lung	NS	NS	NS	carcinoma	small_cell_carcinoma	NS	NS	male		55	caucasian		Caucasian			CCLE	ECACC						NA	lung_small_cell	lung_small_cell	Lung:SCLC	132.593	SCLC
CORL95_LUNG	ACH-000743	COR-L95	primary	lung	NS	NS	NS	carcinoma	small_cell_carcinoma	NS	NS	male		64			Caucasian			CCLE	ECACC	SUSPENSION	RPMI-1640+10% FBS	2mM L-GLUTAMINE	5%DMSO		123.4	lung_small_cell	lung_small_cell	Lung:SCLC	147.086	SCLC
PECAPJ49_UPPER_AERODIGESTIVE_TRACT	ACH-000735	PE/CA-PJ49	primary	upper_aerodigestive_tract	mouth	tongue	NS	carcinoma	squamous_cell_carcinoma	NS	NS	male		57	caucasian		Caucasian			CCLE	ECACC	adherent	IMDM+10% FBS	2mM L-glutamine	5% DMSO		54.5	upper_aerodigestive	upper_aerodigestive	Upper_Aerodigestive_Tract:Carcinoma	163.387	HNSC
PECAPJ34CLONEC12_UPPER_AERODIGESTIVE_TRACT	ACH-000606	PE/CA-PJ34 (clone C12)	primary	upper_aerodigestive_tract	mouth	NS	NS	carcinoma	squamous_cell_carcinoma	NS	NS	male		60			Caucasian			CCLE	ECACC						NA	upper_aerodigestive	upper_aerodigestive	Upper_Aerodigestive_Tract:Carcinoma	131.759	HNSC
CORL51_LUNG	ACH-001047	COR-L51	metastasis	lung	NS	NS	NS	carcinoma	small_cell_carcinoma	NS	NS	male		71	caucasian		Caucasian	pleura		CCLE	NA	NA	NA	NA	NA	NA	NA	lung_small_cell	lung_small_cell	NA	NA	SCLC
RT11284_URINARY_TRACT	ACH-001183	RT112/84	primary	urinary_tract	bladder	NS	NS	carcinoma	NS	NS	NS	female		NA			Caucasian			CCLE	NA	NA	NA	NA	NA	NA	NA	urinary_tract	urinary_tract	NA	NA	BLCA
PECAPJ41CLONED2_UPPER_AERODIGESTIVE_TRACT	ACH-000732	PE/CA-PJ41 (clone D2)	primary	upper_aerodigestive_tract	mouth	NS	NS	carcinoma	squamous_cell_carcinoma	NS	NS	female		67			Caucasian			CCLE	ECACC						NA	upper_aerodigestive	upper_aerodigestive	Upper_Aerodigestive_Tract:Carcinoma	164.204	HNSC
OV7_OVARY	ACH-000688	OV7	primary	ovary	NS	NS	NS	carcinoma	NS	NS	NS	female		78			Caucasian			CCLE	ECACC	adherent epithelial	DMEM:F12 (1:1)+5%FBS	2mM L-glutamine, 0.5ug/ml hydrocortisone, 10ug/ml insulin	5%DMSO		58.2	ovary	ovary	Ovary:Carcinoma	154.701	OV
HT55_LARGE_INTESTINE	ACH-000926	HT55	primary	large_intestine	colon	NS	NS	carcinoma	adenocarcinoma	NS	NS			NA			Caucasian			CCLE	ECACC						NA	colorectal	colorectal	Colorectal:Carcinoma	390.808	COAD/READ
OAW42_OVARY	ACH-000704	OAW42	metastasis	ovary	NS	NS	NS	carcinoma	NS	NS	NS	female		NA			Caucasian	ascites	ovarian_cancer	CCLE	ECACC	Epithelial Adherent	DMEM+10%FBS	2mM L-Glutamine, 20 IU/L Bovine Insuline			50	ovary	ovary	Ovary:Carcinoma	189.444	OV
MDST8_LARGE_INTESTINE	ACH-000935	MDST8	primary	large_intestine	colon	NS	NS	carcinoma	adenocarcinoma	NS	NS			NA			Caucasian			CCLE	ECACC	adherent	DMEM+10% FBS	2mM L-glutamine	5% DMSO		40.9	colorectal	colorectal	Colorectal:Carcinoma	368.677	COAD/READ
OAW28_OVARY	ACH-000116	OAW28	primary	ovary	NS	NS	NS	carcinoma	NS	NS	NS	female		NA			Caucasian			CCLE	ECACC						NA	ovary	ovary	Ovary:Carcinoma	83.5338	OV
SUIT2_PANCREAS	ACH-000652	SUIT-2	metastasis	pancreas	NS	NS	NS	carcinoma	ductal_carcinoma	NS	NS	male		73	asian	japan	Asian	liver	moderately differentiated tubular adenocarcinoma	CCLE	HSSRB	adherent epithelial-like	EMEM+10% FBS	NA	5% DMSO	38.2 hrs	40.6	pancreas	pancreas	Pancreas:Carcinoma	189.362	PAAD
LC1SQSF_LUNG	ACH-001113	LC-1/sq-SF	primary	lung	NS	NS	NS	carcinoma	squamous_cell_carcinoma	NS	NS	male		69	asian	japan	Asian			CCLE	RIKEN	adherenet	RPMI-F12 (1:1) +10% FBS	NA	5% DMSO		126.9	lung_NSC	lung_NSC	NA	NA	NA
KASUMI1_HAEMATOPOIETIC_AND_LYMPHOID_TISSUE	ACH-000263	KASUMI-1	primary	haematopoietic_and_lymphoid_tissue	NS	NS	NS	haematopoietic_neoplasm	acute_myeloid_leukaemia	M2	NS	male		7	asian	japan	Asian			CCLE	GNF					~ 48 - 72 hrs	67.7	AML	AML	Leukemia:AML	118.448	LAML
SUPM2_HAEMATOPOIETIC_AND_LYMPHOID_TISSUE	ACH-000226	SUP-M2	metastasis	haematopoietic_and_lymphoid_tissue	NS	NS	NS	lymphoid_neoplasm	anaplastic_large_cell_lymphoma	NS	NS	female		5			Caucasian	cerebrospinal_fluid		CCLE	DSMZ	round cells growing singly or in clumps in suspension	RPMI-1640+ 20% FBS	NA	5% DMSO	40-50hrs	62.3	lymphoma_other	T-cell_lymphoma_other	Lymphoma:NH_T_cell	107.195	NA
SKHEP1_LIVER	ACH-000361	SK-HEP-1	metastasis	liver	NS	NS	NS	carcinoma	adenocarcinoma	NS	NS	male		52	caucasian		Caucasian	ascites		CCLE	ATCC	adherent epithelial	EMEM + 10% FBS	NA	5%DMSO		44.4	liver	liver	Liver:Carcinoma_Adeno	144.894	LIHC
OVCAR8_OVARY	ACH-000696	OVCAR-8	primary	ovary	NS	NS	NS	carcinoma	NS	NS	NS	female		64			Caucasian		ovarian_cancer	CCLE	NIBRI						NA	ovary	ovary	Ovary:Carcinoma	154.942	OV
NCIH2172_LUNG	ACH-000924	NCI-H2172	primary	lung	NS	NS	NS	carcinoma	non_small_cell_carcinoma	NS	NS	female		NA			African_american			CCLE	ATCC	Adherent	RPMI+10%FBS	NA	5% DMSO		55	lung_NSC	lung_NSC	Lung:NSCLC_Others	395.847	UNABLE TO CLASSIFY
ISHIKAWAHERAKLIO02ER_ENDOMETRIUM	ACH-000961	Ishikawa (Heraklio) 02 ER-	primary	endometrium	NS	NS	NS	carcinoma	adenocarcinoma	NS	NS	female		39			Asian		well differentiated endometrial adenocarcinoma	CCLE							NA	endometrium	endometrium	Endometrium:Carcinoma	659.208	UCEC
NCIH596_LUNG	ACH-000628	NCI-H596	primary	lung	NS	NS	NS	carcinoma	mixed_adenosquamous_carcinoma	NS	NS	male		73	caucasian		Caucasian			CCLE	ATCC	adherent	RPMI-1640+10% FBS	NA	5% DMSO		156.9	lung_NSC	lung_NSC	Lung:NSCLC_Adeno	130.023	LUAD
NCIH650_LUNG	ACH-000945	NCI-H650	metastasis	lung	NS	NS	NS	carcinoma	bronchioloalveolar_adenocarcinoma	NS	NS	male		NA			Caucasian	lymph_node		CCLE	ATCC	Mixed cells	DMEM:F12	plethora; see sheet	5% DMSO		90.6	lung_NSC	lung_NSC	Lung:NSCLC_Adeno	436.1	LUAD
SW1573_LUNG	ACH-000677	SW 1573	primary	lung	NS	NS	NS	carcinoma	squamous_cell_carcinoma	NS	NS	female		44	caucasian		Caucasian		lung_cancer	CCLE	ATCC	Adherent epithelial	L15+10%FBS	NA	5%DMSO		41.9	lung_NSC	lung_NSC	Lung:NSCLC_Squamous	122.605	LUAD
OVMANA_OVARY	ACH-000646	OVMANA	primary	ovary	NS	NS	NS	carcinoma	clear_cell_carcinoma	NS	NS	female		51	asian	japan	Asian			CCLE	NIBRI						NA	ovary	ovary	Ovary:Carcinoma	173.233	OV
SKCO1_LARGE_INTESTINE	ACH-000400	SK-CO-1	primary	large_intestine	colon	NS	NS	carcinoma	adenocarcinoma	NS	NS	male		65	caucasian		Caucasian			CCLE	ATCC	ADHERENT EPITHELIAL;	EMEM +10% FBS	NA	5% DMSO		76	colorectal	colorectal	Colorectal:Carcinoma	101.398	COAD/READ
KARPAS299_HAEMATOPOIETIC_AND_LYMPHOID_TISSUE	ACH-000053	KARPAS-299	primary	haematopoietic_and_lymphoid_tissue	NS	NS	NS	lymphoid_neoplasm	anaplastic_large_cell_lymphoma	NS	NS	male		25			Caucasian		CD30+_anaplastic_large_cell_lymphoma	CCLE	ECAAC	Lymphoblastoid, suspension	RPMI-1640+20% FBS	2mM L-glutamine	5% DMSO	30 hrs	45.5	lymphoma_other	T-cell_lymphoma_other	Lymphoma:NH_T_cell	68.1231	NA
YAPC_PANCREAS	ACH-000332	YAPC	metastasis	pancreas	NS	NS	NS	carcinoma	NS	NS	NS	male		43	asian	japan	Asian	ascites		CCLE	DSMZ	Adherent	RPMI-1640 + 10% FBS	NA	10%DMSO		72.7	pancreas	pancreas	Pancreas:Carcinoma	115.525	PAAD
HT1197_URINARY_TRACT	ACH-000547	HT-1197	primary	urinary_tract	bladder	NS	NS	carcinoma	NS	NS	NS	male		44	caucasian		Caucasian			CCLE	NIBRI						NA	urinary_tract	urinary_tract	Bladder:Carcinoma	122.395	BLCA
A253_SALIVARY_GLAND	ACH-000740	A-253	primary	salivary_gland	submaxillary	NS	NS	carcinoma	mucoepidermoid_carcinoma	NS	NS	male		54	caucasian		Caucasian			CCLE	ATCC	Adherent	McCoy's 5A + 10% FBS	NA	5% DMSO		47.3	other	upper_aerodigestive	Salivary_Gland:Carcinoma	150.158	HNSC
HCC366_LUNG	ACH-000840	HCC-366	primary	lung	NS	NS	NS	carcinoma	mixed_adenosquamous_carcinoma	NS	NS	female		80			Caucasian		lung_cancer	CCLE	DSMZ	Adhrent cells growing as monolayers; dt=30-40hrs	RPMI-1640+10%FBS	NA	10% DMSO	30-40 hrs	176	lung_NSC	lung_NSC	Lung:NSCLC_Adeno	220.21	LUAD
DKMG_CENTRAL_NERVOUS_SYSTEM	ACH-000244	DK-MG	primary	central_nervous_system	parietal_lobe	NS	NS	glioma	astrocytoma_Grade_IV	glioblastoma_multiforme	NS	female		67			Caucasian			CCLE	DSMZ	SPINDLE, FIBROBLAST-LIKE CELLS GROWING MOSTLY ADHERENT AS MONOLAYER	RPMI-1640+10% FBS	2mM l-GLUTAMINE	5% DMSO	50 hrs	77.7	glioma	glioma	CNS:Glioma_HighGrade	73.9368	GBM
SNU349_KIDNEY	ACH-000907	SNU-349	primary	kidney	NS	NS	NS	carcinoma	clear_cell_renal_cell_carcinoma	NS	NS	male		68	asian		Asian			CCLE	KCLB	epithelial adherent	RPMI+10%FBS	NA	5%DMSO	120hrs	46.5	kidney	kidney	Kidney:Carcinoma	337.664	KIRC
UMUC1_URINARY_TRACT	ACH-000834	UM-UC-1	primary	urinary_tract	bladder	NS	NS	carcinoma	transitional_cell_carcinoma	NS	NS	male		NA	african_american		African_american			CCLE	ECACC	Adherent	MEM + 10 % FBS	2mM GLUTAMINE + 1% NEAA	5% DMSO		163.8	urinary_tract	urinary_tract	Bladder:Carcinoma	186.099	BLCA
NAMALWA_HAEMATOPOIETIC_AND_LYMPHOID_TISSUE	ACH-000944	NAMALWA	primary	haematopoietic_and_lymphoid_tissue	NS	NS	NS	lymphoid_neoplasm	Burkitt_lymphoma	NS	NS	female		3			African_american		lymphoma	CCLE	JCRB	Lymphoblast like; suspension	RPMI-1640+10% FBS	NA	5% DMSO		54.1	lymphoma_Burkitt	lymphoma_Burkitt	Lymphoma:NH_B_cell	670.694	DLBC
NCIH292_LUNG	ACH-001075	NCI-H292	metastasis	lung	NS	NS	NS	carcinoma	mucoepidermoid_carcinoma	NS	NS	female		32	african_american		African_american	lymph_node		CCLE	NIBRI						NA	lung_NSC	lung_NSC	Lung:Others	117.719	NA
59M_OVARY	ACH-000520	59M	metastasis	ovary	NS	NS	NS	carcinoma	NS	NS	NS	female		NA			Caucasian	ascites	ovarian_carcinoma	CCLE	ECACC						NA	ovary	ovary	Ovary:Carcinoma	110.612	OV
U118MG_CENTRAL_NERVOUS_SYSTEM	ACH-000040	U-118 MG	primary	central_nervous_system	brain	NS	NS	glioma	astrocytoma	NS	NS			NA			Caucasian		brain_cancer	CCLE		Adherent	DMEM+10% FBS	NA	5% DMSO		49.9	glioma	glioma	CNS:Glioma	73.1107	GBM
VMRCLCD_LUNG	ACH-001233	VMRC-LCD	primary	lung	NS	NS	NS	carcinoma	adenocarcinoma	NS	NS	male		NA			Caucasian		lung_cancer	CCLE	HSRRB	MIX	EMEM+10% FBS	NA	5% DMSO		NA	lung_NSC	lung_NSC	NA	NA	LUAD
HCC1833_LUNG	ACH-000712	HCC-1833	primary	lung	NS	NS	NS	carcinoma	adenocarcinoma	NS	NS	female		69	caucasian		African_american		lung_cancer	CCLE	KCLB	epithelial; monolayer	RPMI 1640 with L-glutamine (300mg/L), 90%; heat inactivated fetal bovine serum (FBS),10%	25mM Hepes and 25mM NaHCo3		NA	NA	lung_NSC	lung_NSC	Lung:NSCLC_Adeno	159.983	LUAD
RH30_SOFT_TISSUE	ACH-000833	RH-30	metastasis	soft_tissue	striated_muscle	NS	NS	rhabdomyosarcoma	alveolar	NS	NS	male		17	caucasian		Caucasian	bone_marrow		CCLE	DSMZ	adherent epithelial-like cells growing as monolayer	90-95% RPMI 1640 +5-10 h.i. FBS	NA		~ 35 hrs	NA	soft_tissue	soft_tissue	Soft_Tissue:Sarcoma_Rhabdoid	195.105	SARC
TCCSUP_URINARY_TRACT	ACH-000720	TCCSUP	primary	urinary_tract	bladder	NS	NS	carcinoma	transitional_cell_carcinoma	NS	NS	female		67			Caucasian			CCLE	NIBRI						NA	urinary_tract	urinary_tract	Bladder:Carcinoma	139.235	BLCA
SNU601_STOMACH	ACH-000736	SNU-601	metastasis	stomach	NS	NS	NS	carcinoma	NS	NS	NS	male		34	asian	korea	Asian	ascites		CCLE	KCLB	epithelial; monolayer	RPMI 1640 with L-glutamine (300mg/L), 90%; heat inactivated fetal bovine serum (FBS),10%	25mM Hepes and 25mM NaHCo3		NA	NA	stomach	stomach	Gastric:Carcinoma	198.629	STAD
CAL33_UPPER_AERODIGESTIVE_TRACT	ACH-000518	CAL-33	primary	upper_aerodigestive_tract	mouth	tongue	NS	carcinoma	squamous_cell_carcinoma	NS	NS	male		69			Caucasian			CCLE	DSMZ	epitheloid cells growing adherent in monolayers	DMEM+10% FBS	2mM L-glutamine	5%DMSO	30-40hrs	24.8	upper_aerodigestive	upper_aerodigestive	Upper_Aerodigestive_Tract:Carcinoma	127.705	HNSC
SNU668_STOMACH	ACH-000344	SNU-668	metastasis	stomach	NS	NS	NS	carcinoma	signet_ring_adenocarcinoma	NS	NS	male		63	asian	korea	Asian	ascites		CCLE	KCLB	epithelial; monolayer	RPMI 1640 with L-glutamine (300mg/L), 90%; heat inactivated fetal bovine serum (FBS),10%	25mM Hepes and 25mM NaHCo3		NA	NA	stomach	stomach	Gastric:Carcinoma	133.822	STAD
CORL279_LUNG	ACH-000257	COR-L279	metastasis	lung	NS	NS	NS	carcinoma	small_cell_carcinoma	NS	NS	male		63			Caucasian	lymph_node		CCLE	ECACC						NA	lung_small_cell	lung_small_cell	Lung:SCLC	82.9642	SCLC
GB1_CENTRAL_NERVOUS_SYSTEM	ACH-000738	GB-1	primary	central_nervous_system	brain	NS	NS	glioma	astrocytoma_Grade_IV	glioblastoma_multiforme	NS	male		35			Asian			CCLE	HSSRB	NA	Dulbecco's modified Eagle's medium with 10% fetal calf serum	NA		NA	NA	glioma	glioma	CNS:Glioma_HighGrade	165.594	GBM
KURAMOCHI_OVARY	ACH-000524	KURAMOCHI	metastasis	ovary	NS	NS	NS	carcinoma	undifferentiated_carcinoma	NS	NS	female		NA	asian		Asian			CCLE	GNF						NA	ovary	ovary	Ovary:Carcinoma	130.358	UNABLE TO CLASSIFY
COLO775_HAEMATOPOIETIC_AND_LYMPHOID_TISSUE	ACH-001043	COLO 775	primary	haematopoietic_and_lymphoid_tissue	NS	NS	NS	haematopoietic_neoplasm	chronic_myeloid_leukaemia	NS	NS	female		57			African_american			CCLE	NA	NA	NA	NA	NA	NA	NA	CML	CML	NA	NA	LCML
COLO684_ENDOMETRIUM	ACH-000864	COLO 684	primary	endometrium	NS	NS	NS	carcinoma	adenocarcinoma	NS	NS	female		63			Caucasian			CCLE	ECACC						NA	endometrium	endometrium	Endometrium:Carcinoma	235.448	UCEC
KLM1_PANCREAS	ACH-001101	KLM-1	primary	pancreas	NS	NS	NS	carcinoma	ductal_carcinoma	NS	NS			NA			Asian			CCLE	NA	NA	NA	NA	NA	NA	NA	pancreas	pancreas	NA	NA	PAAD
GRM_SKIN	ACH-001072	GR-M	primary	skin	NS	NS	NS	malignant_melanoma	NS	NS	NS	male		36	caucasian		Asian			CCLE	NA	NA	NA	NA	NA	NA	NA	melanoma	melanoma	NA	NA	SKCM
SNU685_ENDOMETRIUM	ACH-000407	SNU-685	primary	endometrium	NS	NS	NS	carcinoma	carcinosarcoma-malignant_mesodermal_mixed_tumour	NS	NS	female		70	asian		Asian			CCLE	KCLB	polypoid; monolayer	RPMI 1640 with L-glutamine (300mg/L), 90%; heat inactivated fetal bovine serum (FBS),10%	25mM Hepes and 25mM NaHCo3		20 hrs	NA	endometrium	endometrium	Endometrium:Others	133.097	UCEC
CMK86_HAEMATOPOIETIC_AND_LYMPHOID_TISSUE	ACH-001037	CMK-86	primary	haematopoietic_and_lymphoid_tissue	NS	NS	NS	haematopoietic_neoplasm	acute_myeloid_leukaemia	NS	NS			NA			Asian			CCLE	NA	NA	NA	NA	NA	NA	NA	AML	AML	NA	NA	LAML
SNU886_LIVER	ACH-000316	SNU-886	primary	liver	NS	NS	NS	carcinoma	hepatocellular_carcinoma	NS	NS	male		57	asian	korea	Asian			CCLE	KCLB	epithelial; monolayer	RPMI 1640 with L-glutamine (300mg/L), 90%; heat inactivated fetal bovine serum (FBS),10%	25mM Hepes and 25mM NaHCo3		25 hrs	NA	liver	liver	Liver:HCC	148.526	LIHC
HCT8_LARGE_INTESTINE	ACH-001084	HCT-8	primary	large_intestine	colon	NS	NS	carcinoma	adenocarcinoma	NS	NS	male		67			NA		colon_cancer	CCLE	NA	NA	NA	NA	NA	NA	NA	colorectal	colorectal	NA	NA	COAD/READ
NCCSTCK140_STOMACH	ACH-000110	NCC-StC-K140	primary	stomach	NS	NS	NS	carcinoma	NS	NS	NS	female		36			Asian			CCLE	RIKEN	other	DMEM + 10%FBS	NA		NA	NA	stomach	stomach	Gastric:Carcinoma	103.844	STAD
NCIH3255_LUNG	ACH-000109	NCI-H3255	primary	lung	NS	NS	NS	carcinoma	adenocarcinoma	NS	NS			NA			Caucasian			CCLE	NIBRI						NA	lung_NSC	lung_NSC	Lung:NSCLC_Adeno	87.004	LUAD
SNU719_STOMACH	ACH-000898	SNU-719	primary	stomach	NS	NS	NS	carcinoma	NS	NS	NS	male		53	asian	korea	Asian			CCLE	KCLB	epithelial; monolayer	RPMI 1640 with L-glutamine (300mg/L), 90%; heat inactivated fetal bovine serum (FBS),10%	25mM Hepes and 25mM NaHCo3		NA	NA	stomach	stomach	Gastric:Carcinoma	343.165	STAD
SNU489_CENTRAL_NERVOUS_SYSTEM	ACH-000543	SNU-489	primary	central_nervous_system	brain	NS	NS	glioma	astrocytoma_Grade_IV	glioblastoma_multiforme	NS	male		54	asian		Asian			CCLE	KCLB	spindle; monolayer	RPMI 1640 with L-glutamine (300mg/L), 90%; heat inactivated fetal bovine serum (FBS),10%	25mM Hepes and 25mM NaHCo3		48 hrs	NA	glioma	glioma	CNS:Glioma_HighGrade	177.452	GBM
SNU81_LARGE_INTESTINE	ACH-000991	SNU-81	primary	large_intestine	colon	NS	NS	carcinoma	NS	NS	NS	male		53	asian		Asian			CCLE	KCLB	epithelial; monolayer	RPMI 1640 with L-glutamine (300mg/L), 90%; heat inactivated fetal bovine serum (FBS),10%	25mM Hepes and 25mM NaHCo3		30 hrs	NA	colorectal	colorectal	Colorectal:Carcinoma	1759.7	COAD/READ
A2058_SKIN	ACH-000788	A2058	metastasis	skin	NS	NS	NS	malignant_melanoma	NS	NS	NS	male		43	caucasian		Caucasian	lymph_node	melanoma	CCLE	GNF						NA	melanoma	melanoma	Skin:Melanoma	164.677	SKCM
HTK_HAEMATOPOIETIC_AND_LYMPHOID_TISSUE	ACH-001094	HTK-	primary	haematopoietic_and_lymphoid_tissue	NS	NS	NS	lymphoid_neoplasm	plasma_cell_myeloma	NS	NS			NA			Caucasian			CCLE	NA	NA	NA	NA	NA	NA	NA	multiple_myeloma	multiple_myeloma	NA	NA	MM
SNU1040_LARGE_INTESTINE	ACH-000999	SNU-1040	primary	large_intestine	colon	NS	NS	carcinoma	NS	NS	NS	male		34	asian		Asian			CCLE	KCLB	epithelial; monolayer	RPMI 1640 with L-glutamine (300mg/L), 90%; heat inactivated fetal bovine serum (FBS),10%	25mM Hepes and 25mM NaHCo3		63 hrs	NA	colorectal	colorectal	Colorectal:Carcinoma	3119.62	COAD/READ
SNU1076_UPPER_AERODIGESTIVE_TRACT	ACH-000549	SNU-1076	primary	upper_aerodigestive_tract	larynx	subglottis	NS	carcinoma	squamous_cell_carcinoma	NS	NS	male		60	asian		Asian			CCLE	KCLB	epithelial; monolayer	RPMI 1640 with L-glutamine (300mg/L), 90%; heat inactivated fetal bovine serum (FBS),10%	25mM Hepes and 25mM NaHCo3		36 hrs	NA	upper_aerodigestive	upper_aerodigestive	Upper_Aerodigestive_Tract:Carcinoma	165.315	HNSC
SNU175_LARGE_INTESTINE	ACH-000989	SNU-175	primary	large_intestine	colon	NS	NS	carcinoma	NS	NS	NS	female		56	asian		Asian			CCLE	KCLB	lymphoblast-like, round; suspention	RPMI 1640 with L-glutamine (300mg/L), 90%; heat inactivated fetal bovine serum (FBS),10%	25mM Hepes and 25mM NaHCo3		33 hrs	NA	colorectal	colorectal	Colorectal:Carcinoma	1460.75	COAD/READ
SNU407_LARGE_INTESTINE	ACH-000955	SNU-407	metastasis	large_intestine	colon	NS	NS	carcinoma	NS	NS	NS	male		37	asian		Asian			CCLE	KCLB	epithelial; monolayer	RPMI 1640 with L-glutamine (300mg/L), 90%; heat inactivated fetal bovine serum (FBS),10%	25mM Hepes and 25mM NaHCo3		42 hrs	NA	colorectal	colorectal	Colorectal:Carcinoma	525.994	COAD/READ
SNU201_CENTRAL_NERVOUS_SYSTEM	ACH-000623	SNU-201	primary	central_nervous_system	brain	NS	NS	glioma	astrocytoma_Grade_IV	glioblastoma_multiforme	NS	male		58	asian		Asian			CCLE	KCLB	spendle; monolayer	RPMI 1640 with L-glutamine(300mg/L), 90%; heat inactivatedfetal bovine serum (FBS), 10%	25mM Hepes and 25mM NaHCo3		61 hrs	NA	glioma	glioma	CNS:Glioma_HighGrade	155.588	GBM
KMS20_HAEMATOPOIETIC_AND_LYMPHOID_TISSUE	ACH-000426	KMS-20	primary	haematopoietic_and_lymphoid_tissue	NS	NS	NS	lymphoid_neoplasm	plasma_cell_myeloma	NS	NS	female		65	asian		Asian		multiple_myeloma	CCLE		suspension	RPMI1640+10%FBS	NA	5%DMSO		130	multiple_myeloma	multiple_myeloma	Lymphoma:Multiple_Myeloma	130.761	MM
SNU216_STOMACH	ACH-000466	SNU-216	metastasis	stomach	NS	NS	NS	carcinoma	NS	NS	NS	female		46	asian	korea	Asian	lymph_node		CCLE	KCLB	epithelial; monolayer	RPMI 1640 with L-glutamine (300mg/L), 90%; heat inactivated fetal bovine serum (FBS),10%	25mM Hepes and 25mM NaHCo3		NA	NA	stomach	stomach	Gastric:Carcinoma	129.381	STAD
SNU1196_BILIARY_TRACT	ACH-000461	SNU-1196	primary	biliary_tract	bile_duct	NS	NS	carcinoma	NS	NS	NS			NA			Asian			CCLE	KCLB	epithelial; monolayer	RPMI 1640 with L-glutamine (300mg/L), 90%; heat inactivated fetal bovine serum (FBS),10%	25mM Hepes and 25mM NaHCo3		48 hrs	NA	bile_duct	bile_duct	Biliary_Tract:Carcinoma	120.764	NA
SNU1079_BILIARY_TRACT	ACH-000209	SNU-1079	primary	biliary_tract	bile_duct	NS	NS	carcinoma	NS	NS	NS			NA			Asian			CCLE	NA	NA	NA	NA	NA	NA	NA	bile_duct	bile_duct	Biliary_Tract:Carcinoma	110.044	NA
HCC1195_LUNG	ACH-000868	HCC-1195	primary	lung	NS	NS	NS	carcinoma	mixed_adenosquamous_carcinoma	NS	NS	male		47	african_american		African_american		lung_cancer	CCLE	KCLB	epithelial; monolayer	RPMI 1640 with L-glutamine (300mg/L), 90%; heat inactivated fetal bovine serum (FBS),10%	25mM Hepes and 25mM NaHCo3		NA	NA	lung_NSC	lung_NSC	Lung:NSCLC_Adeno	254.588	LUAD
NCIH854_LUNG	ACH-000710	NCI-H854	primary	lung	NS	NS	NS	carcinoma	adenocarcinoma	NS	NS			NA			Caucasian			CCLE	KCLB	suspention	RPMI 1640 with L-glutamine (300mg/L), 90%; heat inactivated fetal bovine serum (FBS),10%	25mM Hepes and 25mM NaHCo3		NA	NA	lung_NSC	lung_NSC	Lung:NSCLC_Adeno	158.143	LUAD
SNU466_CENTRAL_NERVOUS_SYSTEM	ACH-000289	SNU-466	primary	central_nervous_system	brain	NS	NS	glioma	astrocytoma_Grade_IV	glioblastoma_multiforme	NS	male		61	asian		Asian			CCLE	KCLB	spendle; monolayer	RPMI 1640 with L-glutamine (300mg/L), 90%; heat inactivated fetal bovine serum (FBs),10%	25mM Hepes and 25mM NaHCo3		54 hrs	NA	glioma	glioma	CNS:Glioma_HighGrade	136.379	GBM
YD38_UPPER_AERODIGESTIVE_TRACT	ACH-000762	YD-38	primary	upper_aerodigestive_tract	mouth	gingiva	NS	carcinoma	squamous_cell_carcinoma	NS	NS	male		67	asian		Asian			CCLE	KCLB	epithelial; monolayer	RPMI 1640 with L-glutamine (300mg/L), 90%; heat inactivated fetal bovine serum (FBS),10%	25mM Hepes and 25mM NaHCo3		21.6 hrs	NA	upper_aerodigestive	upper_aerodigestive	Upper_Aerodigestive_Tract:Carcinoma	181.19	HNSC
SNU1105_CENTRAL_NERVOUS_SYSTEM	ACH-000368	SNU-1105	primary	central_nervous_system	brain	NS	NS	glioma	astrocytoma_Grade_IV	glioblastoma_multiforme	NS	male		61	asian		Asian			CCLE	NA	NA	NA	NA	NA	NA	NA	glioma	glioma	CNS:Glioma_HighGrade	140.893	GBM
SNU283_LARGE_INTESTINE	ACH-000708	SNU-283	primary	large_intestine	colon	NS	NS	carcinoma	NS	NS	NS	female		62	asian		Asian			CCLE	KCLB	epithelial; monolayer, clumping	RPMI 1640 with L-glutamine (300mg/L), 90%; heat inactivated fetal bovine serum (FBS),10%	25mM Hepes and 25mM NaHCo3		42 hrs	NA	colorectal	colorectal	Colorectal:Carcinoma	NA	COAD/READ
SNU46_UPPER_AERODIGESTIVE_TRACT	ACH-000500	SNU-46	primary	upper_aerodigestive_tract	larynx	supraglottis	NS	carcinoma	squamous_cell_carcinoma	NS	NS	male		66	asian		Asian			CCLE	KCLB	Epithelial monolayer	RPMI+10%FBS	NA	?	36hrs	80.3	upper_aerodigestive	upper_aerodigestive	Upper_Aerodigestive_Tract:Carcinoma	NA	HNSC
SNU308_BILIARY_TRACT	ACH-000141	SNU-308	primary	biliary_tract	bile_duct	NS	NS	carcinoma	NS	NS	NS			NA			Asian			CCLE	KCLB	epithelial; monolayer	RPMI 1640 with L-glutamine (300mg/L), 90%; heat inactivated fetal bovine serum (FBS),10%	25mM Hepes and 25mM NaHCo3		48 hrs	NA	bile_duct	bile_duct	Biliary_Tract:Carcinoma	115.416	NA
YD8_UPPER_AERODIGESTIVE_TRACT	ACH-000630	YD-8	primary	upper_aerodigestive_tract	mouth	tongue	NS	carcinoma	squamous_cell_carcinoma	NS	NS	female		46	asian		Asian			CCLE	KCLB	epithelial; monolayer	RPMI 1640 with L-glutamine (300mg/L), 90%; heat inactivated fetal bovine serum (FBS),10%	25mM Hepes and 25mM NaHCo3		29.3 hrs	NA	upper_aerodigestive	upper_aerodigestive	Upper_Aerodigestive_Tract:Carcinoma	176.583	HNSC
SNU245_BILIARY_TRACT	ACH-000268	SNU-245	primary	biliary_tract	bile_duct	NS	NS	carcinoma	NS	NS	NS			NA			Asian			CCLE	KCLB	epithelial; monolayer	RPMI 1640 with L-glutamine (300mg/L), 90%; heat inactivated fetal bovine serum (FBS),10%	25mM Hepes and 25mM NaHCo3		54 hrs	NA	bile_duct	bile_duct	Biliary_Tract:Carcinoma	127.219	NA
SNU478_BILIARY_TRACT	ACH-000377	SNU-478	primary	biliary_tract	bile_duct	NS	NS	carcinoma	NS	NS	NS			NA			Asian			CCLE	KCLB	epithelial; monolayer	RPMI 1640 with L-glutamine (300mg/L), 90%; heat inactivated fetal bovine serum (FBS),10%	25mM Hepes and 25mM NaHCo3		52 hrs	NA	bile_duct	bile_duct	Biliary_Tract:Carcinoma	128.97	NA
SNU410_PANCREAS	ACH-000517	SNU-410	primary	pancreas	NS	NS	NS	carcinoma	NS	NS	NS	male		53	asian		Asian			CCLE	KCLB	epithelial; monolayer	RPMI 1640 with L-glutamine (300mg/L), 90%; heat inactivated fetal bovine serum (FBS),10%	25mM Hepes and 25mM NaHCo3		72 hrs	NA	pancreas	pancreas	Pancreas:Carcinoma	171.53	PAAD
SNU899_UPPER_AERODIGESTIVE_TRACT	ACH-000692	SNU-899	primary	upper_aerodigestive_tract	larynx	glottis	NS	carcinoma	squamous_cell_carcinoma	NS	NS	male		56	asian		Asian			CCLE	KCLB	epithelial; monolayer	RPMI 1640 with L-glutamine (300mg/L), 90%; heat inactivated fetal bovine serum (FBS),10%	25mM Hepes and 25mM NaHCo3		48 hrs	NA	upper_aerodigestive	upper_aerodigestive	Upper_Aerodigestive_Tract:Carcinoma	166.674	HNSC
SNU503_LARGE_INTESTINE	ACH-000683	SNU-503	primary	large_intestine	colon	NS	NS	carcinoma	NS	NS	NS	male		52	asian		Asian			CCLE	KCLB						137.5	colorectal	colorectal	Colorectal:Carcinoma	164.592	COAD/READ
SET2_HAEMATOPOIETIC_AND_LYMPHOID_TISSUE	ACH-000195	Set-2	primary	haematopoietic_and_lymphoid_tissue	NS	NS	NS	haematopoietic_neoplasm	essential_thrombocythaemia	NS	NS	female		71			Asian			CCLE		suspension	RPMI-1640 + 20% FBS	NA	5%DMSO		59.7	leukemia_other	leukemia_other	Leukemia:MPD	122.343	NA
SNU738_CENTRAL_NERVOUS_SYSTEM	ACH-000807	SNU-738	primary	central_nervous_system	brain	NS	NS	glioma	oligodendroglioma	NS	NS	male		40	asian		Asian			CCLE	KCLB	spindle; monolayer	RPMI 1640 with L-glutamine (300mg/L), 90%; heat inactivated fetal bovine serum (FBS),10%	25mM Hepes and 25mM NaHCo3		56 hrs	NA	glioma	glioma	CNS:Glioma	268.249	NA
SNU626_CENTRAL_NERVOUS_SYSTEM	ACH-000370	SNU-626	primary	central_nervous_system	brain	NS	NS	glioma	astrocytoma_Grade_IV	glioblastoma_multiforme	NS	male		65	asian		Asian			CCLE	KCLB	spendle; monolayer	RPMI 1640 with L-glutamine (300mg/L), 90%; heat inactivated fetal bovine serum (FBS),10%	25mM Hepes and 25mM NaHCo3		92 hrs	NA	glioma	glioma	CNS:Glioma_HighGrade	138.252	GBM
SNU869_BILIARY_TRACT	ACH-000182	SNU-869	primary	biliary_tract	bile_duct	NS	NS	carcinoma	NS	NS	NS			NA			Asian			CCLE		Epithelial adherent	RPMI-10% FBS	NA	5% DMSO		81.8	bile_duct	bile_duct	Biliary_Tract:Carcinoma	113.352	NA
SNU878_LIVER	ACH-000686	SNU-878	primary	liver	NS	NS	NS	carcinoma	hepatocellular_carcinoma	NS	NS	female		54	asian		Asian			CCLE	KCLB	Epithelial monolayer	RPMI+10%FBS	NA	?	25 hrs	150.3	liver	liver	Liver:HCC	184.931	LIHC
SNU840_OVARY	ACH-000280	SNU-840	primary	ovary	NS	NS	NS	carcinoma	Brenner_tumour	NS	NS	female		45	asian		Asian			CCLE	KCLB	ADHERENT, EPITHELIAL MONOLAYER	RPMI-1640+10% FBS	NA	5%DMSO	40	36.9	ovary	ovary	Ovary:Germline	124.232	OV
SNU8_OVARY	ACH-000460	SNU-8	primary	ovary	NS	NS	NS	carcinoma	adenocarcinoma	NS	NS	female		55	asian		Asian			CCLE	KCLB	ADHERENT, EPITHELIAL MONOLAYER	RPMI-1640+10% FBS	NA	5%DMSO	44	143.9	ovary	ovary	Ovary:Carcinoma	143.46	OV
NCIH684_LIVER	ACH-000089	NCI-H684	primary	liver	NS	NS	NS	other	hepatoblastoma	NS	NS			55			Caucasian			CCLE	KCLB	adherent	ACL-4	NA		NA	NA	liver	liver	Liver:Hepatoblastoma	74.7455	LIHC
IGR39_SKIN	ACH-000550	IGR-39	primary	skin	upper_leg	NS	NS	malignant_melanoma	NS	NS	NS	male		26			Caucasian		Skin Cancer	CCLE	DSMZ	Adherent	DMEM+15%FBS	NA	5% DMSO		40.2	melanoma	melanoma	Skin:Melanoma	NA	SKCM
DAOY_CENTRAL_NERVOUS_SYSTEM	ACH-000211	Daoy	primary	central_nervous_system	brain	NS	NS	primitive_neuroectodermal_tumour-medulloblastoma	NS	NS	NS	male		4	caucasian		Caucasian			CCLE	NIBRI	adherent polygonal	EMEM+10%FBS	NA	5%DMSO	34hrs	40.8	medulloblastoma	medulloblastoma	CNS:Medulloblastoma	92.5566	MB
HEP3B217_LIVER	ACH-000625	Hep 3B2.1-7	primary	liver	NS	NS	NS	carcinoma	hepatocellular_carcinoma	NS	NS	male		8	african_american		African_american		hepatocellular_cancer	CCLE		adherent	EMEM+10%FBS	NA	5%DMSO		NA	liver	liver	Liver:HCC	135.46	LIHC
KYM1_SOFT_TISSUE	ACH-000607	KYM-1	primary	soft_tissue	striated_muscle	NS	NS	rhabdomyosarcoma	NS	NS	NS			1	asian		Asian			CCLE	NIBRI						NA	soft_tissue	soft_tissue	Soft_Tissue:Sarcoma_Rhabdoid	189.033	SARC
LC1F_LUNG	ACH-000705	LC-1F	primary	lung	NS	NS	NS	carcinoma	squamous_cell_carcinoma	NS	NS	male		69	asian		Asian		lung_cancer	CCLE	RIKEN	Mixed cell line.	RPMI-1640+10%FBS	NA	5%DMSO		NA	lung_NSC	lung_NSC	Lung:NSCLC_Squamous	196.938	LUSC
HLE_LIVER	ACH-001089	HLE	primary	liver	NS	NS	NS	carcinoma	hepatocellular_carcinoma	NS	NS	male		68	asian	japan	Asian			CCLE	NA	NA	NA	NA	NA	NA	NA	liver	liver	NA	NA	LIHC
CMK_HAEMATOPOIETIC_AND_LYMPHOID_TISSUE	ACH-000641	CMK	primary	haematopoietic_and_lymphoid_tissue	NS	NS	NS	haematopoietic_neoplasm	acute_myeloid_leukaemia	M7	NS	male		0.8333			Asian		Down syndrome; acute megakaryoblastic leukaemia	CCLE	DSMZ	single, multiformed, large cells growing in suspension, sometimes loosely adherent (<3%); 2-3% giant, multinucleated cells	80% RPMI 1640 + 20% h.i. FBS	N/A	10%DMSO	~ 40-50 hrs	37.6	AML	AML	Leukemia:AML	179.701	LAML
JMSU1_URINARY_TRACT	ACH-000753	JMSU-1	primary	urinary_tract	bladder	NS	NS	carcinoma	NS	NS	NS	male		75			Asian			CCLE	DSMZ	Adherent	RPMI 1640 + 10%FBS	NA	5% DMSO		136.6	urinary_tract	urinary_tract	Bladder:Carcinoma	215.65	BLCA
IMR32_AUTONOMIC_GANGLIA	ACH-000310	IMR-32	primary	autonomic_ganglia	NS	NS	NS	neuroblastoma	NS	NS	NS	male		1	caucasian		Caucasian		neuroblastoma	CCLE	NIBRI						NA	neuroblastoma	neuroblastoma	PNET:Neuroblastoma	100.751	NB
SUDHL8_HAEMATOPOIETIC_AND_LYMPHOID_TISSUE	ACH-000656	SU-DHL-8	metastasis	haematopoietic_and_lymphoid_tissue	NS	NS	NS	lymphoid_neoplasm	diffuse_large_B_cell_lymphoma	NS	NS	male		59			Caucasian	pleura		CCLE	DSMZ	round single cells growing in suspention	80% RPMI 1640 +20% h.i. FBS	NA		~ 48-72 hrs	NA	lymphoma_DLBCL	lymphoma_DLBCL	Lymphoma:NH_B_cell	151.013	DLBC
T3M4_PANCREAS	ACH-000085	T3M-4	metastasis	pancreas	NS	NS	NS	carcinoma	ductal_carcinoma	NS	NS	male		64	asian		Asian	lymph_node		CCLE	RIKEN	Adherent	HAMSF10+ 10% FBS	NA	5% DMSO		144.4	pancreas	pancreas	Pancreas:Carcinoma	112.487	PAAD
COLO818_SKIN	ACH-001044	COLO-818	primary	skin	NS	NS	NS	malignant_melanoma	NS	NS	NS			NA			Caucasian			CCLE	NA	NA	NA	NA	NA	NA	NA	melanoma	melanoma	NA	NA	SKCM
PK45H_PANCREAS	ACH-000468	PK-45H	primary	pancreas	NS	NS	NS	carcinoma	NS	NS	NS			NA			Asian			CCLE	RIKEN	Adherent	RPMI + 10 % FBS	NA	5%DMSO		67.4	pancreas	pancreas	Pancreas:Carcinoma	169.544	PAAD
HEC59_ENDOMETRIUM	ACH-000994	HEC-59	primary	endometrium	NS	NS	NS	carcinoma	adenocarcinoma	NS	NS	female		NA	asian	japan	Asian			CCLE	HSSRB	epithelial-like	Eagle's minimal essential medium with 15% fetal calf serum	NA		NA	NA	endometrium	endometrium	Endometrium:Carcinoma	1614.9	UCEC
CPCN_LUNG	ACH-001049	CPC-N	metastasis	lung	NS	NS	NS	carcinoma	small_cell_carcinoma	NS	NS			NA			Caucasian	pleura		CCLE	ATCC	Suspension	McCoy's 5A +10%FBS	NA	10% DMSO		NA	lung_small_cell	lung_small_cell	NA	NA	SCLC
T3M10_LUNG	ACH-000813	T3M-10	primary	lung	NS	NS	NS	carcinoma	large_cell_carcinoma	NS	NS	male		40	asian		Asian			CCLE	GNF						NA	lung_NSC	lung_NSC	Lung:NSCLC_Large_Cell	235.958	NA
NUGC2_STOMACH	ACH-000761	NUGC-2	primary	stomach	NS	NS	NS	carcinoma	adenocarcinoma	NS	NS	female		56			Asian			CCLE	NIBRI						NA	stomach	stomach	Gastric:Carcinoma	218.015	STAD
PLCPRF5_LIVER	ACH-001318	PLC/PRF/5	primary	liver	NS	NS	NS	carcinoma	hepatocellular_carcinoma	NS	NS	male		24			African_american			CCLE	ATCC	Epithelial Adherent	EMEM +10%FBS	NA	5%DMSO		64.6	liver	liver	Liver:HCC	282.943	LIHC
KPNYN_AUTONOMIC_GANGLIA	ACH-000227	KP-N-YN	metastasis	autonomic_ganglia	NS	NS	NS	neuroblastoma	NS	NS	NS	male		2			Asian	lymph_node	neuroblastoma	CCLE	HSSRB	adherent	RPMI-1640 + 10% FBS	NA	10%DMSO		153.8	neuroblastoma	neuroblastoma	PNET:Neuroblastoma	131.542	NB
CCFSTTG1_CENTRAL_NERVOUS_SYSTEM	ACH-000329	CCF-STTG1	primary	central_nervous_system	brain	NS	NS	glioma	astrocytoma	NS	NS	female		68	caucasian		Caucasian		brain_cancer	CCLE	ATCC	Adherent astrocytic	RPMI-1640+10% FBS	NA	5% DMSO		187.5	glioma	glioma	CNS:Glioma	112.432	GBM
NCIH929_HAEMATOPOIETIC_AND_LYMPHOID_TISSUE	ACH-000050	NCI-H929	metastasis	haematopoietic_and_lymphoid_tissue	NS	NS	NS	lymphoid_neoplasm	plasma_cell_myeloma	NS	NS	female		62	caucasian		Caucasian	pleura	multiple_myeloma	CCLE		Suspension	RPMI1640+10%FBS	NA	5%DMSO		97.2	multiple_myeloma	multiple_myeloma	Lymphoma:Multiple_Myeloma	74.6371	MM
KMRC3_KIDNEY	ACH-000313	KMRC-3	primary	kidney	NS	NS	NS	carcinoma	clear_cell_renal_cell_carcinoma	NS	NS	male	adult	NA	asian	japan	Asian			CCLE	HSSRB	adherent; extremely slow grower	DMEM+ 10% FBS	NA	5%DMSO		73.2	kidney	kidney	Kidney:Carcinoma	142.088	KIRC
NCIH2023_LUNG	ACH-000781	NCI-H2023	metastasis	lung	NS	NS	NS	carcinoma	adenocarcinoma	NS	NS	male		26	caucasian		Caucasian	lymph_node		CCLE	ATCC	adherent	DMEM:HAM's F12 1:1 + 5 % FBS	.005 mg/ml insulin, .01 mg/ml transferrin, 30nM sodium selenite, 10 nM hydrocortisone, 10 nM beta estradiol, 10 mM HEPES, 2 mM L-glutamine	5% DMSO		NA	lung_NSC	lung_NSC	Lung:NSCLC_Adeno	183.41	LUAD
DMS153_LUNG	ACH-000594	DMS 153	metastasis	lung	NS	NS	NS	carcinoma	small_cell_carcinoma	NS	NS	male		44	caucasian		Caucasian	liver		CCLE	ATCC	Mixed line, loosely adherent	Waymouth MB 7521 medium+10%FBS	NA	5%DMSO		63.5	lung_small_cell	lung_small_cell	Lung:SCLC	129.229	SCLC
NCIH1048_LUNG	ACH-000866	NCI-H1048	metastasis	lung	NS	NS	NS	carcinoma	small_cell_carcinoma	NS	NS	female		NA			African_american	pleura		CCLE	ATCC	Adherent epthelial	RPMI-1640 + 10% FBS	5ug/ml insulin, 10ug/ml transferrin, 3.0x10^-8 M Na Selenite (added 5ml Insulin-Transferrin-Selenium); 1.0x10^-8 M Hydrocortisone, 1.0x10^-8 beta estradiol, 2mM L-glutamine, 10mM HEPES	5%DMSO		42.7	lung_small_cell	lung_small_cell	Lung:SCLC	246.702	SCLC
D341MED_CENTRAL_NERVOUS_SYSTEM	ACH-000095	D341 Med	primary	central_nervous_system	cerebellum	NS	NS	primitive_neuroectodermal_tumour-medulloblastoma	NS	NS	NS	male		3.5			Caucasian		medulloblastoma	CCLE	NIBRI						472.8	medulloblastoma	medulloblastoma	CNS:Medulloblastoma	86.3335	MB
NCIH660_PROSTATE	ACH-000177	NCI-H660	metastasis	prostate	NS	NS	NS	carcinoma	small_cell_carcinoma	NS	NS	male		63	caucasian		Caucasian	lymph_node	small_cell_carcinoma	CCLE	GNF						NA	prostate	prostate	Prostate:Carcinoma	86.3101	PRAD
NCIH1618_LUNG	ACH-000179	NCI-H1618	metastasis	lung	NS	NS	NS	carcinoma	small_cell_carcinoma	NS	NS	female		55	caucasian		Caucasian	bone_marrow		CCLE	ATCC		DMEM:HAM's F12 1:1 +5% FBS	.005 mg/ml insulin, .01 mg/ml transferrin, 30nM sodium selenite, 10 nM hydrocortisone, 10 nM beta estradiol, 10 mM HEPES, 2 mM L-glutamine	5%DMSO		NA	lung_small_cell	lung_small_cell	Lung:SCLC	99.0067	SCLC
HS675T_FIBROBLAST	ACH-000214	Hs 675.T	primary	large_intestine	colon	NS	NS	carcinoma	NS	NS	NS	male		NA	caucasian		Caucasian			CCLE	NIBRI						NA	colorectal	fibroblast_like	Colorectal:Carcinoma	91.8157	COAD/READ
PEER_HAEMATOPOIETIC_AND_LYMPHOID_TISSUE	ACH-000519	PEER	primary	haematopoietic_and_lymphoid_tissue	NS	NS	NS	lymphoid_neoplasm	acute_lymphoblastic_T_cell_leukaemia	NS	NS	female		4			Caucasian		T-ALL	CCLE	HSRRB	lymphocyte-like	RPMI 1640 medium with fetal calf serum	NA		NA	NA	T-cell_ALL	T-cell_ALL	Leukemia:ALL	129	ALL
SKM1_HAEMATOPOIETIC_AND_LYMPHOID_TISSUE	ACH-000373	SKM-1	primary	haematopoietic_and_lymphoid_tissue	NS	NS	NS	haematopoietic_neoplasm	acute_myeloid_leukaemia	M5	NS	male		76	asian	japan	Asian			CCLE	HSRRB	suspension	RPMI 1640+20%FBS	NA	5% DMSO		40	AML	AML	Leukemia:AML	164.6	LAML
HT144_SKIN	ACH-000322	HT-144	metastasis	skin	NS	NS	NS	malignant_melanoma	NS	NS	NS	male		29	caucasian		Caucasian	subcutaneous_tissue		CCLE		Fibroblast like adherent	McCoy 5A+15%FBS	NA	5%DMSO		42.5	melanoma	melanoma	Skin:Melanoma	99.3527	SKCM
SKMEL31_SKIN	ACH-000640	SK-MEL-31	primary	skin	NS	NS	NS	malignant_melanoma	NS	NS	NS	female		NA			Caucasian		malignant_melanoma	CCLE	ATCC	adherent	EMEM+10%FBS	NA	5% DMSO		NA	melanoma	melanoma	Skin:Melanoma	133.318	SKCM
HS839T_FIBROBLAST	ACH-000180	Hs 839.T	primary	skin	NS	NS	NS	malignant_melanoma	NS	NS	NS	female		42	caucasian		Caucasian			CCLE	ATCC	Adherent	DMEM +10 %FBS	4.5g/L glucose +1.5 g/Lsodium bicarbonate	5%DMSO		96.9	melanoma	fibroblast_like	Skin:Melanoma	88.0949	SKCM
HS939T_SKIN	ACH-000814	Hs 939.T	primary	skin	NS	NS	NS	malignant_melanoma	NS	NS	NS	female		24	caucasian		Caucasian			CCLE		Large adherent cells, quite a bit of debris	DEMEM+10%FBS		5%DMSO		NA	melanoma	melanoma	Skin:Melanoma	184.422	SKCM
OCILY3_HAEMATOPOIETIC_AND_LYMPHOID_TISSUE	ACH-000158	OCI-LY3	primary	haematopoietic_and_lymphoid_tissue	NS	NS	NS	lymphoid_neoplasm	diffuse_large_B_cell_lymphoma	NS	NS			NA			Caucasian			CCLE	ACADEMIC	SUSPENSION	RPMI-1640+20%FBS	NA	5% DMSO		45.4	lymphoma_DLBCL	lymphoma_DLBCL	Lymphoma:NH_B_cell	109.46	DLBC
HS819T_FIBROBLAST	ACH-000224	Hs 819.T	primary	bone	NS	NS	NS	chondrosarcoma	NS	NS	NS	male		60	caucasian		Caucasian			CCLE	NIBRI						NA	chondrosarcoma	fibroblast_like	Bone:Sarcoma_Chondro	85.7288	SARC
NCIH69_LUNG	ACH-000358	NCI-H69	metastasis	lung	NS	NS	NS	carcinoma	small_cell_carcinoma	NS	NS	male		55	caucasian		Caucasian	pleura	papillary_adenocarcinoma	CCLE	ATCC	floating aggregates	RPMI 1640 + 10% FBS	NA	5% DMSO		98.3	lung_small_cell	lung_small_cell	Lung:SCLC	101.438	SCLC
DV90_LUNG	ACH-000925	DV-90	metastasis	lung	NS	NS	NS	carcinoma	adenocarcinoma	NS	NS	male		50			Caucasian	pleura	lung_cancer	CCLE	DSMZ	ADHERENT CELLS GROWING IN MONOLAYERS	RPMI-1640+10% FBS	2mM L-GLUTAMINE, 1X NEAA	5% DMSO	95 hrs	43.6	lung_NSC	lung_NSC	Lung:NSCLC_Adeno	381.138	LUAD
ZR751_BREAST	ACH-000097	ZR-75-1	metastasis	breast	NS	NS	NS	carcinoma	ductal_carcinoma	NS	NS	female		63	caucasian		Caucasian	ascites	breast_cancer	CCLE	ATCC	adherent epithelial	RPMI-1640 + 10% FBS	NA	5%DMSO		88.7	breast	breast	Breast:Carcinoma	65.3901	BRCA
KG1_HAEMATOPOIETIC_AND_LYMPHOID_TISSUE	ACH-000386	KG-1	primary	haematopoietic_and_lymphoid_tissue	NS	NS	NS	haematopoietic_neoplasm	acute_myeloid_leukaemia	M6	NS	male		59	caucasian		African_american			CCLE	ATCC	suspension	IMDM+20%FBS	NA	5% DMSO		78.5	AML	AML	Leukemia:AML	128.448	LAML
SKNBE2_AUTONOMIC_GANGLIA	ACH-000312	SK-N-BE(2)	metastasis	autonomic_ganglia	NS	NS	NS	neuroblastoma	NS	NS	NS	male		2.16667			Caucasian	bone_marrow	neuroblastoma	CCLE	GNF					30 hrs	NA	neuroblastoma	neuroblastoma	PNET:Neuroblastoma	108.82	NB
HCC70_BREAST	ACH-000668	HCC70	primary	breast	NS	NS	NS	carcinoma	ductal_carcinoma	NS	NS	female		49	african_american		African_american		breast_cancer	CCLE	NIBRI						NA	breast	breast	Breast:Carcinoma	131.44	BRCA
NCIH2452_PLEURA	ACH-000092	NCI-H2452	metastasis	pleura	NS	NS	NS	mesothelioma	NS	NS	NS	male		NA			Caucasian	pleura		CCLE	ATCC	adherent	RPMI 1640 +10% FBS	NA	5%DMSO		48.4	mesothelioma	mesothelioma	Lung:Mesothelioma	72.3667	MESO
SNU1_STOMACH	ACH-000932	SNU-1	metastasis	stomach	NS	NS	NS	carcinoma	undifferentiated_adenocarcinoma	NS	NS	male		44	asian		Asian	ascites	poorly_differentiated_gastric carcinoma	CCLE	NIBRI						NA	stomach	stomach	Gastric:Carcinoma	456.861	STAD
LOUCY_HAEMATOPOIETIC_AND_LYMPHOID_TISSUE	ACH-000104	Loucy	primary	haematopoietic_and_lymphoid_tissue	NS	NS	NS	lymphoid_neoplasm	acute_lymphoblastic_T_cell_leukaemia	NS	NS	female		38	caucasian		Caucasian			CCLE	NIBRI						NA	T-cell_ALL	T-cell_ALL	Leukemia:ALL	95.8369	ALL
HCC56_LARGE_INTESTINE	ACH-000467	HCC-56	primary	large_intestine	colon	NS	NS	carcinoma	adenocarcinoma	NS	NS			NA			Asian			CCLE	NIBRI						NA	colorectal	colorectal	Colorectal:Carcinoma	139.406	COAD/READ
NCIH1648_LUNG	ACH-000766	NCI-H1648	metastasis	lung	NS	NS	NS	carcinoma	adenocarcinoma	NS	NS	male		39	african_american		African_american	lymph_node	lung_cancer	CCLE	ATCC	Mix	DMEM/F12(1:1) +10 % FBS	.02 mg/ml insulin, .01 mg/ml transferrin, 25nM sodium selenite, 50 nM hydrocortisone, 2 mM L-glutamine, 0.5 sodium pyruvate, 1ng/mL EGF	5% DMSO		202.6	lung_NSC	lung_NSC	Lung:NSCLC_Adeno	177.978	LUAD
TO175T_FIBROBLAST	ACH-000125	TO 175.T	metastasis	haematopoietic_and_lymphoid_tissue	lymph_node	NS	NS	lymphoid_neoplasm	Hodgkin_lymphoma	NS	NS	male		29	caucasian		Caucasian	skin		CCLE	GNF						NA	lymphoma_Hodgkin	fibroblast_like	Lymphoma:Hodgkin	74.6037	NA
GLC82_LUNG	ACH-001071	GLC-82	primary	lung	NS	NS	NS	carcinoma	adenocarcinoma	NS	NS	female		58	asian	chinese	African_american			CCLE	ICLC	Epithelial monolayer	DMEM+10% FBS	2mM L-glutamine	5% DMSO	48 hrs	NA	lung_NSC	lung_NSC	NA	NA	NA
MPP89_PLEURA	ACH-000319	MPP 89	metastasis	pleura	NS	NS	NS	mesothelioma	NS	NS	NS	male		67			Caucasian	pleura		CCLE	GNF						NA	mesothelioma	mesothelioma	Lung:Mesothelioma	92.8564	MESO
PANC0813_PANCREAS	ACH-000417	Panc 08.13	primary	pancreas	NS	NS	NS	carcinoma	ductal_carcinoma	NS	NS	male		85	caucasian		Caucasian			CCLE	NIBRI						NA	pancreas	pancreas	Pancreas:Carcinoma	109.174	PAAD
MG63_BONE	ACH-000359	MG-63	primary	bone	NS	NS	NS	osteosarcoma	NS	NS	NS	male		14	caucasian		Caucasian			CCLE	NIBRI						NA	osteosarcoma	osteosarcoma	Bone:Sarcoma_Osteo	98.0278	SARC
PK1_PANCREAS	ACH-000307	PK-1	primary	pancreas	NS	NS	NS	carcinoma	NS	NS	NS			NA			Asian			CCLE	RIKEN	Adherent	RPMI 1640 +10%FBS	NA	5% DMSO		58.2	pancreas	pancreas	Pancreas:Carcinoma	149.15	PAAD
HS840T_FIBROBLAST	ACH-000284	Hs 840.T	benign_neoplasia	upper_aerodigestive_tract	pharynx	NS	NS	other	papilloma	NS	NS	male		7	caucasian		Caucasian			CCLE	GNF						NA	upper_aerodigestive	fibroblast_like	NA	99.7321	NA
NCIH23_LUNG	ACH-000900	NCI-H23	primary	lung	NS	NS	NS	carcinoma	non_small_cell_carcinoma	NS	NS	male		51	african_american		African_american		non_small_cell_lung_cancer	CCLE	ATCC	adherent	RPMI 1640 + 10% FBS	NA	5% DMSO		58.6	lung_NSC	lung_NSC	Lung:NSCLC_Adeno	261.733	LUAD
TE617T_SOFT_TISSUE	ACH-000051	TE 617.T	primary	soft_tissue	striated_muscle	NS	NS	rhabdomyosarcoma	NS	NS	NS	female		1.67	caucasian		Caucasian			CCLE	GNF						NA	soft_tissue	soft_tissue	Soft_Tissue:Sarcoma_Rhabdoid	59.0892	SARC
SW1088_CENTRAL_NERVOUS_SYSTEM	ACH-000437	SW 1088	primary	central_nervous_system	brain	NS	NS	glioma	NS	NS	NS	male		72	caucasian		Caucasian		brain_cancer	CCLE	NIBRI						NA	glioma	glioma	CNS:Glioma	92.5352	GBM
ISTMES2_PLEURA	ACH-000331	IST-MES2	metastasis	pleura	NS	NS	NS	mesothelioma	NS	NS	NS	male		71	caucasian		Caucasian	pleura		CCLE	GNF						NA	mesothelioma	mesothelioma	Lung:Mesothelioma	93.9247	MESO
NCIH1373_LUNG	ACH-000845	NCI-H1373	primary	lung	NS	NS	NS	carcinoma	adenocarcinoma	NS	NS	male		56	african_american		African_american			CCLE	ATCC	adherent	RPMI 1640 +10% FBS	NA	5%DMSO		46.3	lung_NSC	lung_NSC	Lung:NSCLC_Adeno	NA	LUAD
NCIH1930_LUNG	ACH-000870	NCI-H1930	metastasis	lung	NS	NS	NS	carcinoma	small_cell_carcinoma	NS	NS	male		41	caucasian		Caucasian	lymph_node		CCLE	ATCC	Mixed line, majority in suspension	RPMI 1640 +10% FBS	NA	5%DMSO		NA	lung_small_cell	lung_small_cell	Lung:SCLC	237.04	SCLC
NCIH1623_LUNG	ACH-000744	NCI-H1623	metastasis	lung	NS	NS	NS	carcinoma	adenocarcinoma	NS	NS	male		58	caucasian		Caucasian	lymph_node		CCLE	ATCC	Adherent, single cells and clusters loosely attached	RPMI 1640+10%FBS	NA	5%DMSO		189.6	lung_NSC	lung_NSC	Lung:NSCLC_Adeno	154.98	LUAD
HS229T_FIBROBLAST	ACH-000131	Hs 229.T	primary	lung	NS	NS	NS	carcinoma	adenocarcinoma	NS	NS	male		65	caucasian		Caucasian			CCLE	ATCC	Adherent	RPMI+10%FBS	NA	5%DMSO		467.4	lung_NSC	fibroblast_like	Lung:NSCLC_Adeno	62.623	LUAD
NCIH1838_LUNG	ACH-000733	NCI-H1838	primary	lung	NS	NS	NS	carcinoma	non_small_cell_carcinoma	NS	NS	female		NA			Caucasian			CCLE	ATCC	ADHERENT	RPMI-1640+10%FBS	NA	5% DMSO		72	lung_NSC	lung_NSC	Lung:NSCLC_Adeno	152.944	LUAD
NCIH1836_LUNG	ACH-000559	NCI-H1836	primary	lung	NS	NS	NS	carcinoma	small_cell_carcinoma	NS	NS	male		52	caucasian		Caucasian			CCLE	ATCC	Mixed Line	DMEM:HAM's F12 1:1 + 5 % FBS	.005 mg/ml insulin, .01 mg/ml transferrin, 30nM sodium selenite, 10 nM hydrocortisone, 10 nM beta estradiol, 10 mM HEPES, 2 mM L-glutamine	5%DMSO		183.9	lung_small_cell	lung_small_cell	Lung:SCLC	NA	SCLC
HS688AT_FIBROBLAST	ACH-000306	Hs 688(A).T	primary	skin	NS	NS	NS	malignant_melanoma	NS	NS	NS	male		69	caucasian		Caucasian			CCLE		Adherent	DMEM + 10%FBS	NA	5% DMSO		208.5	melanoma	fibroblast_like	Skin:Melanoma	108.261	SKCM
PANC0504_PANCREAS	ACH-000093	Panc 05.04	primary	pancreas	NS	NS	NS	carcinoma	NS	NS	NS	female		77	caucasian		Caucasian			CCLE	ATCC	Adherent	RPMI 1640 +10 FBS	L-glutamine	5% DMSO		555.4	pancreas	pancreas	Pancreas:Carcinoma	77.4525	PAAD
HS822T_FIBROBLAST	ACH-000229	Hs 822.T	primary	bone	NS	NS	NS	Ewings_sarcoma-peripheral_primitive_neuroectodermal_tumour	NS	NS	NS	female		9	caucasian		Caucasian			CCLE	NIBRI						NA	Ewings_Sarcoma	fibroblast_like	NA	96.9115	NA
BL70_HAEMATOPOIETIC_AND_LYMPHOID_TISSUE	ACH-000402	BL-70	primary	haematopoietic_and_lymphoid_tissue	NS	NS	NS	lymphoid_neoplasm	Burkitt_lymphoma	NS	NS	male		16	caucasian		Caucasian			CCLE	NIBRI						NA	lymphoma_Burkitt	lymphoma_Burkitt	Lymphoma:NH_B_cell	116.677	DLBC
CI1_HAEMATOPOIETIC_AND_LYMPHOID_TISSUE	ACH-000687	CI-1	metastasis	haematopoietic_and_lymphoid_tissue	NS	NS	NS	lymphoid_neoplasm	B_cell_lymphoma_unspecified	NS	NS	female		38			Caucasian	ascites		CCLE	NIBRI						NA	lymphoma_other	B-cell_lymphoma_other	Lymphoma:NH_B_cell	155.229	DLBC
G292CLONEA141B1_BONE	ACH-000082	G-292, clone A141B1	primary	bone	NS	NS	NS	osteosarcoma	NS	NS	NS	female		9	caucasian		Caucasian			CCLE	NA	NA	NA	NA	NA	NA	NA	osteosarcoma	osteosarcoma	Bone:Sarcoma_Osteo	71.1086	SARC
RCM1_LARGE_INTESTINE	ACH-000565	RCM-1	primary	large_intestine	rectum	NS	NS	carcinoma	adenocarcinoma	NS	NS	female		73			Asian		rectum; adenocarcinoma; well differentiated	CCLE	HSSRB	ADHERENT	RPMI:F12 1:1+10% FBS	NA	5% DMSO	70hrs	68.5	colorectal	colorectal	Colorectal:Carcinoma	132.119	COAD/READ
HS737T_FIBROBLAST	ACH-000185	Hs 737.T	primary	bone	NS	NS	NS	giant_cell_tumour	NS	NS	NS	female		10	caucasian		Caucasian			CCLE	ATCC	suspension	DMEM+10%FBS	NA	5% DMSO		NA	giant_cell_tumour	fibroblast_like	NA	83.042	NA
HS616T_FIBROBLAST	ACH-000063	Hs 616.T	primary	haematopoietic_and_lymphoid_tissue	lymph_node	NS	NS	lymphoid_neoplasm	Hodgkin_lymphoma	NS	NS	male		16	caucasian		Caucasian			CCLE		Adherent	DMEM + 10% FBS	NA	5%DMSO		NA	lymphoma_Hodgkin	fibroblast_like	NA	81.5092	NA
HS600T_FIBROBLAST	ACH-000240	Hs 600.T	primary	skin	NS	NS	NS	malignant_melanoma	NS	NS	NS			NA			Caucasian			CCLE	GNF						NA	melanoma	fibroblast_like	NA	90.3909	NA
TE159T_FIBROBLAST	ACH-000175	TE 159.T	primary	soft_tissue	striated_muscle	NS	NS	rhabdomyosarcoma	NS	NS	NS	male		6	caucasian		Caucasian		rhabdomyosarcoma	CCLE	GNF						NA	soft_tissue	fibroblast_like	NA	96.5303	NA
A101D_SKIN	ACH-000008	A101D	primary	skin	NS	NS	NS	malignant_melanoma	NS	NS	NS	male		56	caucasian		Caucasian			CCLE	GNF						69.1	melanoma	melanoma	Skin:Melanoma	78.1451	SKCM
NCIH1755_LUNG	ACH-000282	NCI-H1755	metastasis	lung	NS	NS	NS	carcinoma	adenocarcinoma	NS	NS	female		65	caucasian		Caucasian	liver		CCLE	ATCC	Mixed adherent and suspension	RPMI 1640+10%FBS	NA	5%DMSO		41	lung_NSC	lung_NSC	Lung:NSCLC_Adeno	101.87	LUAD
143B_BONE	ACH-001001	143B	primary	bone	NS	NS	NS	osteosarcoma	NS	NS	NS	female		13	caucasian		Caucasian			CCLE	NA	NA	NA	NA	NA	NA	NA	osteosarcoma	osteosarcoma	NA	NA	NA
RERFLCKJ_LUNG	ACH-000482	RERF-LC-KJ	primary	lung	NS	NS	NS	carcinoma	non_small_cell_carcinoma	NS	NS	male		78			Asian		lung_cancer	CCLE	HSSRB	adherent epithelial-like	RPMI-1640+10% FBS	NA	5% DMSO	53hrs	56.5	lung_NSC	lung_NSC	Lung:NSCLC_Others	161.332	LUAD
NCIH1693_LUNG	ACH-000021	NCI-H1693	metastasis	lung	NS	NS	NS	carcinoma	adenocarcinoma	NS	NS	female		55	caucasian		Caucasian	lymph_node		CCLE	ATCC	Adherent	RPMI1640+5%FBS	NA	10%DMSO		94.7	lung_NSC	lung_NSC	Lung:NSCLC_Adeno	103.815	LUAD
SW780_URINARY_TRACT	ACH-000384	SW 780	primary	urinary_tract	bladder	NS	NS	carcinoma	transitional_cell_carcinoma	NS	NS	female		80	caucasian		Caucasian			CCLE	ATCC	Adherent	L15 + 10% FBS	NA	5% DMSO		92.9	urinary_tract	urinary_tract	Bladder:Carcinoma	93.1448	BLCA
HS683_CENTRAL_NERVOUS_SYSTEM	ACH-000067	Hs 683	primary	central_nervous_system	brain	NS	NS	glioma	NS	NS	NS	male		76	caucasian		Caucasian			CCLE	NIBRI						NA	glioma	glioma	CNS:Glioma	85.7318	LGG
RKO_LARGE_INTESTINE	ACH-000943	RKO	primary	large_intestine	colon	NS	NS	carcinoma	adenocarcinoma	NS	NS			NA			African_american			CCLE	ATCC	adherent epithelial	EMEM+ 10% FBS	NA	5% DMSO		25.6	colorectal	colorectal	Colorectal:Carcinoma	495.079	COAD/READ
HS729_SOFT_TISSUE	ACH-000133	Hs 729	primary	soft_tissue	striated_muscle	NS	NS	rhabdomyosarcoma	NS	NS	NS	male		74	caucasian		Caucasian		rhabdomyosarcoma	CCLE	NIBRI						NA	soft_tissue	soft_tissue	Soft_Tissue:Sarcoma_Rhabdoid	87.6061	SARC
JHOS2_OVARY	ACH-000132	JHOS-2	primary	ovary	NS	NS	NS	carcinoma	adenocarcinoma	NS	NS	female		45	asian		Asian			CCLE	RIKEN		DMEM:F12 + 10% FBS	0.1 mM NEAA	5% DMSO		133.4	ovary	ovary	Ovary:Carcinoma	121.583	OV
MCF7_BREAST	ACH-000019	MCF7	metastasis	breast	NS	NS	NS	carcinoma	NS	NS	NS	female		69	caucasian		Caucasian	pleura	breast_cancer	CCLE	ATCC	ADHERENT CELLS	EMEM+10% FBS	0.01 mg/ml bovine insulin	5% DMSO		84.9	breast	breast	Breast:Carcinoma	95.0233	BRCA
U937_HAEMATOPOIETIC_AND_LYMPHOID_TISSUE	ACH-000406	U-937	metastasis	haematopoietic_and_lymphoid_tissue	NS	NS	NS	lymphoid_neoplasm	diffuse_large_B_cell_lymphoma	NS	NS	male		37	caucasian		Caucasian	pleura	histiocytic_lymphoma	CCLE	NIBRI		RPMI-1640 + 10% FBS	NA	5%DMSO		115.9	lymphoma_DLBCL	AML	Lymphoma:NH_B_cell	125.233	DLBC
SKLMS1_SOFT_TISSUE	ACH-000145	SK-LMS-1	primary	soft_tissue	fibrous_tissue_and_uncertain_origin	vulva	NS	sarcoma	NS	NS	NS	female		43	caucasian		Caucasian			CCLE	NIBRI						NA	soft_tissue	soft_tissue	NA	81.0591	NA
HUTU80_SMALL_INTESTINE	ACH-000538	HuTu 80	primary	small_intestine	duodenum	NS	NS	carcinoma	adenocarcinoma	NS	NS	male		53	caucasian		African_american			CCLE	NIBRI						NA	other	other	NA	129.224	NA
HCC202_BREAST	ACH-000725	HCC202	primary	breast	NS	NS	NS	carcinoma	ductal_carcinoma	NS	NS	female		82	caucasian		Caucasian		ductal_carcinoma	CCLE	ATCC	Adherent	RPMI+10%FBS	NA	5%DMSO		261.1	breast	breast	Breast:Carcinoma	159.635	BRCA
MEG01_HAEMATOPOIETIC_AND_LYMPHOID_TISSUE	ACH-000072	MEG-01	primary	haematopoietic_and_lymphoid_tissue	NS	NS	NS	haematopoietic_neoplasm	blast_phase_chronic_myeloid_leukaemia	NS	NS	male		55			Asian			CCLE	NIBRI						NA	CML	CML	Leukemia:CML	98.1777	LCML
REH_HAEMATOPOIETIC_AND_LYMPHOID_TISSUE	ACH-000960	Reh	primary	haematopoietic_and_lymphoid_tissue	NS	NS	NS	lymphoid_neoplasm	acute_lymphoblastic_B_cell_leukaemia	NS	NS	female		15	north_african		Caucasian			CCLE	ATCC	Lymphoblast suspension	RPMI 1640+10%FBS	NA	5%DMSO		62.7	B-cell_ALL	B-cell_ALL	Leukemia:ALL	485.442	ALL
ONS76_CENTRAL_NERVOUS_SYSTEM	ACH-000776	ONS-76	primary	central_nervous_system	brain	NS	NS	primitive_neuroectodermal_tumour-medulloblastoma	NS	NS	NS	female		2			Asian			CCLE	HSSRB	epithelial-like	RPMI 1640 medium with 10% fetal bovine serum	NA		NA	NA	medulloblastoma	medulloblastoma	CNS:Medulloblastoma	222.618	MB
RPMI6666_HAEMATOPOIETIC_AND_LYMPHOID_TISSUE	ACH-001182	RPMI 6666	primary	haematopoietic_and_lymphoid_tissue	NS	NS	NS	lymphoblastoid	B_cell	NS	NS			NA			Caucasian			CCLE	NIBRI						NA	lymphoma_Hodgkin	lymphoma_Hodgkin	NA	NA	NA
SNUC1_LARGE_INTESTINE	ACH-000722	SNU-C1	metastasis	large_intestine	colon	NS	NS	carcinoma	adenocarcinoma	NS	NS	male		71	asian		Asian	peritoneum		CCLE	NIBRI						NA	colorectal	colorectal	Colorectal:Carcinoma	201.56	COAD/READ
SKNDZ_AUTONOMIC_GANGLIA	ACH-000366	SK-N-DZ	metastasis	autonomic_ganglia	NS	NS	NS	neuroblastoma	NS	NS	NS	female		2	caucasian		Caucasian	bone_marrow	neuroblastoma	CCLE	NIBRI						NA	neuroblastoma	neuroblastoma	PNET:Neuroblastoma	105.559	NB
DMS114_LUNG	ACH-000530	DMS 114	primary	lung	NS	NS	NS	carcinoma	small_cell_carcinoma	NS	NS	male		68	caucasian		Caucasian		lung_cancer	CCLE	ATCC	Adherent	Waymouth MB 7521 medium+10%FBS	NA	5%DMSO		77.7	lung_small_cell	lung_small_cell	Lung:SCLC	140.195	SCLC
TT_OESOPHAGUS	ACH-000561	NA	NA	NA	NA	NA	NA	NA	NA	NA	NA	NA	NA	NA	NA	NA	NA	NA	NA	NA	HSSRB		DMEM:HAM's F12 1:1 +10% FBS	NA	10%DMSO	1.2 days	51.8	esophagus	esophagus	NA	170.095	ESCA
OCILY10_HAEMATOPOIETIC_AND_LYMPHOID_TISSUE	ACH-001146	OCI-LY10	primary	haematopoietic_and_lymphoid_tissue	lymph_node	NS	NS	lymphoid_neoplasm	diffuse_large_B_cell_lymphoma	NS	NS			NA			Caucasian			CCLE	NA	NA	NA	NA	NA	NA	NA	lymphoma_DLBCL	lymphoma_DLBCL	NA	NA	DLBC
ST486_HAEMATOPOIETIC_AND_LYMPHOID_TISSUE	ACH-000567	ST486	metastasis	haematopoietic_and_lymphoid_tissue	NS	NS	NS	lymphoid_neoplasm	Burkitt_lymphoma	NS	NS	female		NA			Caucasian	ascites		CCLE	NIBRI						NA	lymphoma_Burkitt	lymphoma_Burkitt	Lymphoma:NH_B_cell	91.4389	DLBC
OC315_OVARY	ACH-001144	OC 315	primary	ovary	NS	NS	NS	carcinoma	serous_carcinoma	NS	NS	female		49			NA			CCLE	ICLC	Epithelial-like grown as monolayer	RPMI+10%FBS	2mM L-Glutamine			32.7	ovary	ovary	NA	NA	OV
OC314_OVARY	ACH-000962	OC 314	metastasis	ovary	NS	NS	NS	carcinoma	serous_carcinoma	NS	NS	female		39			Caucasian	ascites		CCLE	ICLC	Epithelial-like grown in monolayer	RPMI+10%FBS	2mM L-glutamine	5		41.8	ovary	ovary	Ovary:Carcinoma	532.817	OV
SW1353_BONE	ACH-000418	SW 1353	primary	bone	humerus	NS	NS	chondrosarcoma	NS	NS	NS	female		72	caucasian		Caucasian			CCLE	NIBRI	Adherent Fibroblast	RPMI1640 + 10%FBS				101.3	chondrosarcoma	chondrosarcoma	Bone:Sarcoma_Chondro	104.836	SARC
MDAMB157_BREAST	ACH-000621	MDA-MB-157	metastasis	breast	NS	NS	NS	carcinoma	ductal_carcinoma	medullary	NS	female		44	african_american		African_american	pleura	breast_cancer	CCLE	ATCC	Adherent	RPMI+10%FBS	NA	5%DMSO		106.4	breast	breast	Breast:Carcinoma	136.815	BRCA
LN18_CENTRAL_NERVOUS_SYSTEM	ACH-000819	LN-18	primary	central_nervous_system	brain	NS	NS	glioma	astrocytoma_Grade_IV	glioblastoma_multiforme	NS	male		65	caucasian		Caucasian			CCLE	ATCC	ADHERENT	DMEM+5% FBS	NA	5% DMSO		47.4	glioma	glioma	CNS:Glioma_HighGrade	204.792	GBM
769P_KIDNEY	ACH-000411	769-P	primary	kidney	NS	NS	NS	carcinoma	clear_cell_renal_cell_carcinoma	NS	NS	female		63	caucasian		Caucasian		kidney_cancer	CCLE	ATCC	Epithelial adherent	RPMI1640+10%FBS	NA	5%DMSO		31.5	kidney	kidney	Kidney:Carcinoma	104.273	KIRC
786O_KIDNEY	ACH-000649	786-O	primary	kidney	NS	NS	NS	carcinoma	clear_cell_renal_cell_carcinoma	NS	NS	male		58	caucasian		Caucasian		kidney_cancer	CCLE	NIBRI						NA	kidney	kidney	Kidney:Carcinoma	170.966	KIRC
CAOV3_OVARY	ACH-000713	Caov-3	primary	ovary	NS	NS	NS	carcinoma	adenocarcinoma	NS	NS	female		54	caucasian		Caucasian			CCLE	NIBRI						NA	ovary	ovary	Ovary:Carcinoma	140.912	OV
HEPG2_LIVER	ACH-000739	Hep G2	primary	liver	NS	NS	NS	carcinoma	hepatocellular_carcinoma	NS	NS	male		15	caucasian	argentina	Caucasian		liver_cancer	CCLE	NIBRI/ATCC	Epithelial adherent	EMEM +10%FBS	NA	5% DMSO		40.7	liver	liver	Liver:HCC	169.681	LIHC
MOLT4_HAEMATOPOIETIC_AND_LYMPHOID_TISSUE	ACH-001127	MOLT-4	primary	haematopoietic_and_lymphoid_tissue	NS	NS	NS	lymphoid_neoplasm	acute_lymphoblastic_T_cell_leukaemia	NS	NS	male		19			Caucasian		leukaemia	CCLE	NA	NA	NA	NA	NA	NA	NA	T-cell_ALL	T-cell_ALL	NA	NA	ALL
NCIH524_LUNG	ACH-000816	NCI-H524	metastasis	lung	NS	NS	NS	carcinoma	small_cell_carcinoma	NS	NS	male		63	caucasian		Caucasian	lymph_node		CCLE	ATCC	Suspension	RPMI-1640+10%FBS	NA	5% DMSO		425	lung_small_cell	lung_small_cell	Lung:SCLC	187.202	SCLC
NCIH209_LUNG	ACH-000290	NCI-H209	metastasis	lung	NS	NS	NS	carcinoma	small_cell_carcinoma	NS	NS	male		55	caucasian		Caucasian	bone_marrow	lung_cancer	CCLE		Suspension	RPMI-1640+10%FBS	NA	5%DMSO		115.6	lung_small_cell	lung_small_cell	Lung:SCLC	98.238	SCLC
MIAPACA2_PANCREAS	ACH-000601	MIA PaCa-2	primary	pancreas	NS	NS	NS	carcinoma	ductal_carcinoma	NS	NS	male		65	caucasian		Caucasian			CCLE	NIBRI						NA	pancreas	pancreas	Pancreas:Carcinoma	139.642	PAAD
MCAS_OVARY	ACH-000796	MCAS	primary	ovary	NS	NS	NS	carcinoma	adenocarcinoma	NS	NS	female		NA			Asian		Ovarian Cancer	CCLE	HSRRB	Adherent; DT=27hrs	EMEM+20%FBS	NA	5% DMSO	27 hrs	30	ovary	ovary	Ovary:Carcinoma	232.181	OV
SBC5_LUNG	ACH-000670	SBC-5	primary	lung	NS	NS	NS	carcinoma	small_cell_carcinoma	NS	NS			NA			Asian		lung_cancer	CCLE	HSRRB	Adherent	EMEM+10%FBS	NA	5% DMSO		44.0172	lung_small_cell	lung_small_cell	Lung:SCLC	180.366	SCLC
COLO829_SKIN	ACH-000644	COLO 829	primary	skin	NS	NS	NS	malignant_melanoma	NS	NS	NS	male		45	caucasian		Caucasian			CCLE	ATCC	Adherent fibroblast.	RPMI-1640+10% FBS	NA	5%DMSO		126.9	melanoma	melanoma	Skin:Melanoma	113.627	SKCM
VCAP_PROSTATE	ACH-000115	VCaP	metastasis	prostate	NS	NS	NS	carcinoma	adenocarcinoma	NS	NS	male		59	caucasian		Caucasian	vertebra	prostate_cancer	CCLE	ATCC	Adherent	DMEM + 10% FBS	NA	5%DMSO		NA	prostate	prostate	Prostate:Carcinoma	84.9765	PRAD
COLO704_OVARY	ACH-001042	COLO-704	metastasis	ovary	NS	NS	NS	carcinoma	NS	NS	NS	female		46	caucasian		Caucasian	ascites	metastatic_ovarian_cancer	CCLE	DSMZ	Grow as clusters and single cells in suspension; dt=30-40hrs	RPMI-1640+10%FBS	NA	10% DMSO	30-40 hrs	88.3	ovary	ovary	NA	NA	OV
IPC298_SKIN	ACH-000915	IPC-298	primary	skin	NS	NS	NS	malignant_melanoma	NS	NS	NS	female		64			Caucasian			CCLE	DSMZ	Adherent	RPMI 1640+10%FBS	NA	5% DMSO	30 hrs	29	melanoma	melanoma	Skin:Melanoma	317.892	SKCM
CAPAN2_PANCREAS	ACH-000107	Capan-2	primary	pancreas	NS	NS	NS	carcinoma	ductal_carcinoma	NS	NS	male		56	caucasian		Caucasian			CCLE	NIBRI						NA	pancreas	pancreas	Pancreas:Carcinoma	75.2369	PAAD
EFM192A_BREAST	ACH-000117	EFM-192A	metastasis	breast	NS	NS	NS	carcinoma	NS	NS	NS	female		46	caucasian		Caucasian	pleura	breast_cancer	CCLE	NIBRI						96.7	breast	breast	Breast:Carcinoma	81.5651	BRCA
HS766T_PANCREAS	ACH-000178	Hs 766T	metastasis	pancreas	NS	NS	NS	carcinoma	ductal_carcinoma	NS	NS	male		46	caucasian		Caucasian			CCLE	NIBRI						NA	pancreas	pancreas	Pancreas:Carcinoma	74.1166	PAAD
EFO27_OVARY	ACH-000936	EFO-27	metastasis	ovary	NS	NS	NS	carcinoma	mucinous_carcinoma	NS	NS	female		36			Caucasian	omentum		CCLE	NIBRI						NA	ovary	ovary	Ovary:Carcinoma	426.564	OV
A2780_OVARY	ACH-000657	A2780	primary	ovary	NS	NS	NS	carcinoma	adenocarcinoma	NS	NS	female		NA			African_american		ovarian_cancer	CCLE	NIBRI	Monolayer and suspension	RPMI1640+10%FBS	2mM L-Glutamine			73.3	ovary	ovary	Ovary:Carcinoma	206.549	UNABLE TO CLASSIFY
NCIH196_LUNG	ACH-000752	NCI-H196	metastasis	lung	NS	NS	NS	carcinoma	small_cell_carcinoma	NS	NS	male		68	caucasian		Caucasian	pleura		CCLE	ATCC	Adherent	RPMI+10%FBS	NA	5% DMSO		75.3	lung_small_cell	lung_small_cell	Lung:SCLC	168.944	SCLC
IGROV1_OVARY	ACH-000966	IGROV1	primary	ovary	NS	NS	NS	carcinoma	adenocarcinoma	NS	NS	female		47			Caucasian		ovarian_cancer	CCLE	NCI/DCTD		RPMI-1640 + 10% FBS	NA	5%DMSO		43.3	ovary	ovary	Ovary:Carcinoma	633.109	OV
NCIH889_LUNG	ACH-000297	NCI-H889	metastasis	lung	NS	NS	NS	carcinoma	small_cell_carcinoma	NS	NS	female		69	caucasian		Caucasian	lymph_node		CCLE	ATCC	clusters in suspension	RPMI-1640+10%FBS	NA	5% DMSO		NA	lung_small_cell	lung_small_cell	Lung:SCLC	104.787	SCLC
NCIH211_LUNG	ACH-000639	NCI-H211	metastasis	lung	NS	NS	NS	carcinoma	small_cell_carcinoma	NS	NS	female		50	caucasian		Caucasian	bone_marrow		CCLE	ATCC	Suspension	RPMI-1640+10%FBS	NA	5% DMSO		176	lung_small_cell	lung_small_cell	Lung:SCLC	144.386	SCLC
HS571T_OVARY	ACH-001092	Hs 571.T	primary	ovary	NS	NS	NS	carcinoma	NS	NS	NS	female		65	caucasian		Caucasian			CCLE	ATCC	Adherent; fibroblasts; very slow grower	DMEM+10%FBS	NA	5% DMSO		NA	ovary	fibroblast_like	NA	NA	NA
MDAPCA2B_PROSTATE	ACH-000952	MDA PCa 2b	metastasis	prostate	NS	NS	NS	carcinoma	adenocarcinoma	NS	NS	male		63	african_american		African_american	bone	prostate_cancer	CCLE	ATCC	adherent epithelial	HAMS F12 +20% FBS	5ug/ml insulin, 10ug/ml transferrin, 30nM Na Selenite, 10nM Hydrocortisone, 10nM Beta-estradiol, 10mM HEPES, 2mM L-glutamine	5% DMSO		NA	prostate	prostate	Prostate:Carcinoma	547.707	PRAD
SKMEL24_SKIN	ACH-000822	SK-MEL-24	metastasis	skin	NS	NS	NS	malignant_melanoma	NS	NS	NS	male		67	caucasian		Caucasian	lymph_node		CCLE	ATCC	Adherent	EMEM + 10% FBS	0.1 mM NEAA	5%DMSO		110.8	melanoma	melanoma	Skin:Melanoma	180.588	SKCM
K029AX_SKIN	ACH-000404	K029AX	primary	skin	NS	NS	NS	malignant_melanoma	NS	NS	NS			NA			Caucasian		Skin Cancer	CCLE	Acd Lab		RPMI-1640+10% FBS	NA	5% DMSO		57	melanoma	melanoma	Skin:Melanoma	95.979	SKCM
HT1376_URINARY_TRACT	ACH-000724	HT-1376	primary	urinary_tract	bladder	NS	NS	carcinoma	transitional_cell_carcinoma	NS	NS	female		58	caucasian		Caucasian			CCLE		Epithelial adherent	EMEM +10%FBS	NA	5%DMSO		NA	urinary_tract	urinary_tract	Bladder:Carcinoma	164.419	BLCA
NCIH2171_LUNG	ACH-000525	NCI-H2171	metastasis	lung	NS	NS	NS	carcinoma	small_cell_carcinoma	NS	NS	male		50	caucasian		Caucasian	pleura		CCLE	ATCC	Suspension; floating clusters	DMEM:F12+5% FBS	5ug/ml insulin, 10ug/ml transferrin, 30nM Na Selenite, 10nM Hydrocortisone, 10nM Beta-estradiol, 10mM HEPES, 2mM L-glutamine	5% DMSO		86.1	lung_small_cell	lung_small_cell	Lung:SCLC	123.317	SCLC
PANC1005_PANCREAS	ACH-000060	Panc 10.05	primary	pancreas	NS	NS	NS	carcinoma	ductal_carcinoma	NS	NS	male		NA	caucasian		Caucasian			CCLE	NIBRI						NA	pancreas	pancreas	Pancreas:Carcinoma	77.8373	PAAD
EVSAT_BREAST	ACH-001065	EVSA-T	metastasis	breast	NS	NS	NS	carcinoma	NS	NS	NS	female		NA			Caucasian	ascites		CCLE	NA	NA	NA	NA	NA	NA	NA	breast	breast	NA	NA	BRCA
HS695T_SKIN	ACH-000799	Hs 695T	metastasis	skin	NS	NS	NS	malignant_melanoma	NS	NS	NS	male		26	caucasian		Caucasian	lymph_node	melanoma	CCLE	ATCC	Adherent	EMEM +10%FBS	0.1mM NEAA	5% DMSO		148.6	melanoma	melanoma	Skin:Melanoma	167.075	SKCM
CHL1_SKIN	ACH-001024	CHL-1	primary	skin	NS	NS	NS	malignant_melanoma	NS	NS	NS			NA			Caucasian			CCLE	ATCC	Epithelial Adherent	RPMI1640+15%FBS	NA	5%DMSO		48.7	melanoma	melanoma	NA	NA	SKCM
LOUNH91_LUNG	ACH-000176	LOU-NH91	primary	lung	NS	NS	NS	carcinoma	squamous_cell_carcinoma	NS	NS	female		64			Caucasian		Lung Cancer	CCLE	DSMZ	ADHERENT OVOID TO EPITHELOID CELLS GROWING IN MONOLAYERS	RPMI-1640 + 20% FBS	2mM L-GLUTAMINE	5%DMSO		101.6	lung_NSC	lung_NSC	Lung:NSCLC_Squamous	91.7227	LUSC
LK2_LUNG	ACH-000769	LK-2	primary	lung	NS	NS	NS	carcinoma	squamous_cell_carcinoma	NS	NS			NA			Asian		lung_cancer	CCLE	RIKEN	EPITHELIAL-LIKE ADHERENT CELLS	RPMI-1640+10%FBS	NA	5%DMSO		71	lung_NSC	lung_NSC	Lung:NSCLC_Squamous	191.769	LUSC
TOV21G_OVARY	ACH-000885	TOV-21G	primary	ovary	NS	NS	NS	carcinoma	clear_cell_carcinoma	NS	NS	female		62			Caucasian			CCLE		Adherent	MCDB 105 1:1 Media 199 +10%FBS	NA	5%DMSO		44.1	ovary	ovary	Ovary:Carcinoma	241.646	OV
SKMEL3_SKIN	ACH-000423	SK-MEL-3	metastasis	skin	NS	NS	NS	malignant_melanoma	NS	NS	NS	female		42	caucasian		Caucasian	lymph_node		CCLE		Fibroblast like adherent	McCoy 5A+15%FBS	NA	5%DMSO		387	melanoma	melanoma	Skin:Melanoma	108.449	SKCM
ASPC1_PANCREAS	ACH-000222	AsPC-1	metastasis	pancreas	NS	NS	NS	carcinoma	ductal_carcinoma	NS	NS	female		62	caucasian		Caucasian	ascites	pancreatic_cancer	CCLE	ATCC	Adherent	RPMI-1640 10% FBS +1 mM Sodium pyruvate	NA	5%DMSO		171.5	pancreas	pancreas	Pancreas:Carcinoma	88.0798	PAAD
OVSAHO_OVARY	ACH-000409	OVSAHO	metastasis	ovary	NS	NS	NS	carcinoma	adenocarcinoma	NS	NS	female		56	asian	japan	Asian	abdomen	Ovarian Cancer	CCLE	HSSRB	Adherent / Mixed 0.05% TRYPSIN	RPMI-1640+10%FBS	NA	5% DMSO		61.7	ovary	ovary	Ovary:Carcinoma	129.734	OV
NCIH441_LUNG	ACH-000638	NCI-H441	metastasis	lung	NS	NS	NS	carcinoma	adenocarcinoma	NS	NS			NA			Caucasian	pericardial_effusion		CCLE	ATCC	Adherent; DT=58hrs	RPMI-1640+10%FBS	NA	5% DMSO	58	279	lung_NSC	lung_NSC	Lung:NSCLC_Adeno	131.333	LUAD
RERFLCSQ1_LUNG	ACH-000442	RERF-LC-Sq1	primary	lung	NS	NS	NS	carcinoma	squamous_cell_carcinoma	NS	NS	female		74	asian		Asian		Lung Cancer	CCLE	HSRRB	ADHERENT; 0.05% TRYPSIN	RPMI-1640 +10% FBS	NA	5%DMSO		NA	lung_NSC	lung_NSC	NA	150.187	LUSC
NCIH2030_LUNG	ACH-000521	NCI-H2030	metastasis	lung	NS	NS	NS	carcinoma	non_small_cell_carcinoma	NS	NS	male		NA			Caucasian	lymph_node		CCLE	ATCC	adherent; epithelial	RPMI-1640+10%FBS	NA	5% DMSO		57.4	lung_NSC	lung_NSC	Lung:NSCLC_Adeno	113.245	LUAD
HMCB_SKIN	ACH-000931	HMCB	primary	skin	NS	NS	NS	malignant_melanoma	NS	NS	NS			NA			Caucasian		Skin Cancer	CCLE		Epithelial adherent	EMEM +10%FBS	NEAA, 10mM Hepes, 10mM Sodium Pyruvate	5%DMSO		63.7	melanoma	melanoma	Skin:Melanoma	366.813	SKCM
FUOV1_OVARY	ACH-000574	FU-OV-1	primary	ovary	NS	NS	NS	carcinoma	serous_carcinoma	NS	NS	female		65	asian	japan	Asian		ovarian_cancer	CCLE	NIBRI						NA	ovary	ovary	Ovary:Carcinoma	168.063	OV
MALME3M_SKIN	ACH-000477	Malme-3M	metastasis	skin	NS	NS	NS	malignant_melanoma	NS	NS	NS	male		43	caucasian		Caucasian	lung	skin_cancer	CCLE	NIBRI						122.9	melanoma	melanoma	Skin:Melanoma	111.605	SKCM
KMS12BM_HAEMATOPOIETIC_AND_LYMPHOID_TISSUE	ACH-000380	KMS-12-BM	primary	haematopoietic_and_lymphoid_tissue	NS	NS	NS	lymphoid_neoplasm	plasma_cell_myeloma	NS	NS	female		64			Asian		Multiple Myeloma	CCLE	DSMZ	Supsension	RPMI-1640+20% FBS		5% DMSO		NA	multiple_myeloma	multiple_myeloma	Lymphoma:Multiple_Myeloma	127.15	MM
T98G_CENTRAL_NERVOUS_SYSTEM	ACH-000571	T98G	primary	central_nervous_system	brain	NS	NS	glioma	astrocytoma_Grade_IV	glioblastoma_multiforme	NS	male		61	caucasian		Caucasian		brain_cancer	CCLE	ATCC	adherent fibroblast	EMEM+10% FBS	NA	5% DMSO		37	glioma	glioma	CNS:Glioma_HighGrade	130.344	GBM
HL60_HAEMATOPOIETIC_AND_LYMPHOID_TISSUE	ACH-000002	HL-60	primary	haematopoietic_and_lymphoid_tissue	NS	NS	NS	haematopoietic_neoplasm	acute_myeloid_leukaemia	M2	NS	female		35	caucasian		Caucasian		leukaemia	CCLE	ATCC	suspension; do not allow cell concentration to exceed 1e6cells/ml	IMDM+20 % FBS	na	5%DMSO		113.3	AML	AML	Leukemia:AML	81.1337	LAML
DBTRG05MG_CENTRAL_NERVOUS_SYSTEM	ACH-000863	DBTRG-05MG	primary	central_nervous_system	brain	NS	NS	glioma	astrocytoma_Grade_IV	glioblastoma_multiforme	NS	female		59	caucasian		Caucasian			CCLE	ATCC	ADHERENT FIBROBLAST	RPMI-1640+10% FBS	HEPES, ADENOSINE TRIPHOSPHATE, AMINO ACIDS	5% DMSO		54.2	glioma	glioma	CNS:Glioma_HighGrade	204.713	GBM
HEYA8_OVARY	ACH-000542	Hey-A8	metastasis	ovary	NS	NS	NS	carcinoma	NS	NS	NS	female		NA			Caucasian		Ovarian Cancer	CCLE	NIBRI						NA	ovary	ovary	Ovary:Carcinoma	111.036	OV
NCIH2122_LUNG	ACH-000311	NCI-H2122	metastasis	lung	NS	NS	NS	carcinoma	adenocarcinoma	NS	NS	female		46	caucasian		Caucasian	pleura	lung_cancer	CCLE	ATCC	Suspension	RPMI-1640+10%FBS	NA	5%DMSO		47.7752	lung_NSC	lung_NSC	Lung:NSCLC_Adeno	116.828	LUAD
MELJUSO_SKIN	ACH-000881	MEL-JUSO	primary	skin	NS	NS	NS	malignant_melanoma	NS	NS	NS	female		58			Caucasian		melanoma	CCLE	DSMZ	Adherent epithelial, monolayer	RPMI-1640+10% FBS	NA	10%DMSO		36.4	melanoma	melanoma	Skin:Melanoma	232.644	SKCM
SW620_LARGE_INTESTINE	ACH-000651	SW620	metastasis	large_intestine	colon	NS	NS	carcinoma	adenocarcinoma	NS	NS	male		51	caucasian		Caucasian	lymph_node	colon_cancer	CCLE	ATCC		DMEM+10% FBS	NA	5% DMSO		20.9	colorectal	colorectal	Colorectal:Carcinoma	165.195	COAD/READ
HCT116_LARGE_INTESTINE	ACH-000971	HCT 116	primary	large_intestine	colon	NS	NS	carcinoma	NS	NS	NS	male	adult	NA			Caucasian		colon_carcinoma	CCLE	NIBRI						NA	colorectal	colorectal	Colorectal:Carcinoma	726.558	COAD/READ
VMRCRCZ_KIDNEY	ACH-000171	VMRC-RCZ	primary	kidney	NS	NS	NS	carcinoma	renal_cell_carcinoma	NS	NS			NA	asian		Caucasian			CCLE	HSRRB	Adherent	EMEM + 10% FBS	NA	5%DMSO		73.6	kidney	kidney	Kidney:Carcinoma	84.8002	KIRC
DU145_PROSTATE	ACH-000979	DU 145	metastasis	prostate	NS	NS	NS	carcinoma	NS	NS	NS	male		69	caucasian		Caucasian	brain	prostate_cancer	CCLE	ATCC	ADHERENT EPITHELIAL;	EMEM + 10% FBS	NA	5% DMSO		161	prostate	prostate	Prostate:Carcinoma	762.923	PRAD
MM1S_HAEMATOPOIETIC_AND_LYMPHOID_TISSUE	ACH-000763	MM1-S	primary	haematopoietic_and_lymphoid_tissue	NS	NS	NS	lymphoid_neoplasm	plasma_cell_myeloma	NS	NS			NA			African_american		myeloma	CCLE	ACDC LAB	Mixed	RPMI-1640+ 10% FBS				35.9	multiple_myeloma	multiple_myeloma	Lymphoma:Multiple_Myeloma	176.97	MM
L33_PANCREAS	ACH-000685	L3.3	metastasis	pancreas	NS	NS	NS	carcinoma	NS	NS	NS			NA			African_american		Pancreatic Cancer	CCLE	Academic Lab	Adherent	RPMI+10%FBS	NA	5%DMSO		37.3	pancreas	pancreas	Pancreas:Carcinoma	138.185	PAAD
SKMEL2_SKIN	ACH-001190	SK-MEL-2	metastasis	skin	thigh	NS	NS	malignant_melanoma	NS	NS	NS	male		60	caucasian		Caucasian	skin	skin_cancer	CCLE		polyglonal adherent			5%DMSO		98.8	melanoma	melanoma	Skin:Melanoma	NA	SKCM
A549_LUNG	ACH-000681	A549	primary	lung	NS	NS	NS	carcinoma	non_small_cell_carcinoma	NS	NS	male		58	caucasian		Caucasian		lung_cancer	CCLE	ATCC	adherent; epithelial; DT=22 hrs	F-12 +10%FBS	NA	5% DMSO		54	lung_NSC	lung_NSC	Lung:NSCLC_Others	159.492	LUAD
A172_CENTRAL_NERVOUS_SYSTEM	ACH-000558	A172	primary	central_nervous_system	brain	NS	NS	glioma	astrocytoma_Grade_IV	glioblastoma_multiforme	NS	male		53			Caucasian		brain_cancer	CCLE	ATCC	Adherent	DMEM +10%FBS	NA	5%DMSO		67.5	glioma	glioma	CNS:Glioma_HighGrade	135.619	GBM
NCIH1975_LUNG	ACH-000587	NCI-H1975	primary	lung	NS	NS	NS	carcinoma	non_small_cell_carcinoma	NS	NS	female		NA			Caucasian		lung_cancer	CCLE	ATCC	ADHERENT EPITHELIAL;	RPMI-1640+10%FBS	NA	5%DMSO		52.6	lung_NSC	lung_NSC	Lung:NSCLC_Adeno	121.509	LUAD
COLO679_SKIN	ACH-000805	COLO-679	metastasis	skin	NS	NS	NS	malignant_melanoma	NS	NS	NS	female		47			Caucasian	soft_tissue		CCLE	DSMZ	Adherent fibroblastic but not limited to monolayer.	RPMI-1640+10% FBS	NA	10%DMSO		69.3	melanoma	melanoma	Skin:Melanoma	191.642	SKCM
KP2_PANCREAS	ACH-000281	KP-2	primary	pancreas	NS	NS	NS	carcinoma	NS	NS	NS	female		65	asian		Asian		Pancreatic Cancer	CCLE	NIBRI						NA	pancreas	pancreas	Pancreas:Carcinoma	139.964	PAAD
HUH1_LIVER	ACH-000475	huH-1	primary	liver	NS	NS	NS	carcinoma	hepatocellular_carcinoma	NS	NS	male		35	asian	japan	Asian			CCLE	HSRRB	Adherent	DMEM +10%FBS	NA	5% DMSO		151.3	liver	liver	Liver:HCC	141.648	LIHC
MDAMB453_BREAST	ACH-000910	MDA-MB-453	metastasis	breast	NS	NS	NS	carcinoma	NS	NS	NS	female		48	caucasian		Caucasian	pericardial_effusion	breast_cancer	CCLE	NIBRI						NA	breast	breast	Breast:Carcinoma	295.736	BRCA
PANC0403_PANCREAS	ACH-000235	Panc 04.03	primary	pancreas	NS	NS	NS	carcinoma	NS	NS	NS	male		70	caucasian		Caucasian			CCLE	ATCC	Adherent Epithelial	RPMI1640+15%FBS	20 Units/ml human recombinant insuline	5%DMSO		39.4	pancreas	pancreas	Pancreas:Carcinoma	102.704	PAAD
TYKNU_OVARY	ACH-000430	TYK-nu	primary	ovary	NS	NS	NS	carcinoma	undifferentiated_carcinoma	NS	NS	female		NA	asian		Asian			CCLE	NIBRI						NA	ovary	ovary	Ovary:Carcinoma	169.399	UNABLE TO CLASSIFY
OVISE_OVARY	ACH-000527	OVISE	metastasis	ovary	NS	NS	NS	carcinoma	clear_cell_carcinoma	NS	NS	female		40	asian	japan	Asian	bone	Ovarian Cancer	CCLE	HSSRB		RPMI-1640 + 10% FBS	NA	5%DMSO		58.5	ovary	ovary	Ovary:Carcinoma	166.397	OV
EFM19_BREAST	ACH-000330	EFM-19	metastasis	breast	NS	NS	NS	carcinoma	ductal_carcinoma	NS	NS	female		50	caucasian		Caucasian	pleura	breast_cancer	CCLE	DSMZ	epitheloid, growing in clusters at first, then monolayer	RPMI-10% FBS	NA	5% DMSO	64 hrs	NA	breast	breast	Breast:Carcinoma	116.313	BRCA
MELHO_SKIN	ACH-000450	MEL-HO	primary	skin	NS	NS	NS	malignant_melanoma	NS	NS	NS	female		NA			Caucasian			CCLE	DSMZ	EPITHELIAL-LIKE ADHERENT CELLS WITH LONG, NARROW, OFTEN BRANCHING CELL BODIES	RPMI-1640+10% FBS	NA	5%DMSO	24 hrs	35.9	melanoma	melanoma	Skin:Melanoma	103.183	SKCM
RL_HAEMATOPOIETIC_AND_LYMPHOID_TISSUE	ACH-000371	RL	metastasis	haematopoietic_and_lymphoid_tissue	NS	NS	NS	lymphoid_neoplasm	B_cell_lymphoma_unspecified	NS	NS	male		52	caucasian		Caucasian	ascites	non-Hodgkins lymphoma	CCLE		suspension	RPMI1640+20%FBS	NA	5% DMSO		62.5	lymphoma_other	B-cell_lymphoma_other	Lymphoma:NH_B_cell	108.591	DLBC
G361_SKIN	ACH-000572	G-361	primary	skin	NS	NS	NS	malignant_melanoma	NS	NS	NS	male		31	caucasian		Caucasian			CCLE	ATCC	ADHERENT EPITHELIAL;	McCoy's 5A +10%FBS	NA	5% DMSO		45.2	melanoma	melanoma	Skin:Melanoma	131.587	SKCM
NCIH647_LUNG	ACH-000378	NCI-H647	metastasis	lung	NS	NS	NS	carcinoma	mixed_adenosquamous_carcinoma	NS	NS	male		56	caucasian		Caucasian	pleura		CCLE	ATCC	Adherent	RPMI-1640+10% FBS	NA	5%DMSO		68.6	lung_NSC	lung_NSC	Lung:NSCLC_Adeno	113.241	LUAD
GMS10_CENTRAL_NERVOUS_SYSTEM	ACH-000102	GMS-10	primary	central_nervous_system	brain	NS	NS	glioma	astrocytoma_Grade_IV	glioblastoma_multiforme	NS	male		49			Caucasian			CCLE	DSMZ	fibroblst-like cells growing as monolayers	DMEM+20% FBS	2mM L-glutamine	5%DMSO		61.1	glioma	glioma	CNS:Glioma_HighGrade	81.8277	GBM
SEM_HAEMATOPOIETIC_AND_LYMPHOID_TISSUE	ACH-000782	SEM	primary	haematopoietic_and_lymphoid_tissue	NS	NS	NS	lymphoid_neoplasm	acute_lymphoblastic_B_cell_leukaemia	NS	NS	female		5			Caucasian			CCLE	DSMZ	SUSPENSION (round polygonal single, rather small cells)	IMDM+10%FBS		10% DMSO		121.5	B-cell_ALL	B-cell_ALL	Leukemia:ALL	192.328	ALL
HLFA_FIBROBLAST	ACH-000797	HLF-a	primary	lung	NS	NS	NS	carcinoma	squamous_cell_carcinoma	NS	NS	female		54	african_american		African_american			CCLE	GNF	Adherent Fibroblast	EMEM+10%FBS	NA	5%DMSO		NA	liver	fibroblast_like	Lung:NSCLC_Squamous	163.053	LUSC
42MGBA_CENTRAL_NERVOUS_SYSTEM	ACH-000323	42-MG-BA	primary	central_nervous_system	brain	NS	NS	glioma	astrocytoma_Grade_IV	glioblastoma_multiforme	NS	male		63			Caucasian		Brain Cancer	CCLE	DSMZ	Adherent	RPMI:EMEM (1:1) +20 % FBS	NA	5%DMSO		82.6	glioma	glioma	CNS:Glioma_HighGrade	107.051	GBM
KCIMOH1_PANCREAS	ACH-001098	KCI-MOH1	primary	pancreas	NS	NS	NS	carcinoma	ductal_carcinoma	NS	NS	female		64	caucasian		Caucasian		Pancreatic Cancer	CCLE	NA	NA	NA	NA	NA	NA	NA	pancreas	pancreas	NA	NA	PAAD
HCC44_LUNG	ACH-000667	HCC-44	primary	lung	NS	NS	NS	carcinoma	adenocarcinoma	NS	NS	female		54	caucasian		Caucasian		lung_cancer	CCLE	DSMZ	Adhrent cells growing as monolayers; dt=30hrs	RPMI-1640+10%FBS	NA	10% DMSO	30	33	lung_NSC	lung_NSC	Lung:NSCLC_Adeno	142.224	LUAD
KYSE70_OESOPHAGUS	ACH-000784	KYSE-70	primary	oesophagus	middle_third	NS	NS	carcinoma	squamous_cell_carcinoma	NS	NS	male		77	asian	japan	Asian			CCLE	DSMZ	Epitheloid cells growing in monolayers	RPMI 1640+10%FBS	NA	10%DMSO		62	esophagus	esophagus	Oesophagus:Carcinoma	201.441	ESCA
1321N1_CENTRAL_NERVOUS_SYSTEM	ACH-001000	1321N1	primary	central_nervous_system	brain	NS	NS	glioma	astrocytoma	NS	NS			NA			Caucasian		Brain Cancer	CCLE	NA	NA	NA	NA	NA	NA	NA	glioma	glioma	NA	NA	NA
GAMG_CENTRAL_NERVOUS_SYSTEM	ACH-000098	GAMG	primary	central_nervous_system	NS	NS	NS	glioma	NS	NS	NS	female		42			Caucasian			CCLE	DSMZ	ADHERENT, LARGE, SPINDLE-LIKE CELLS GROWING AS MONOLAYERS	DMEM+10% FBS	2mM L-GLUTAMINE, 4X MEM NON-ESSENTIAL AMINO ACIDS	5% DMSO	40-50 hrs	33	glioma	glioma	CNS:Glioma	74.3585	LGG
NCIH522_LUNG	ACH-000343	NCI-H522	primary	lung	NS	NS	NS	carcinoma	non_small_cell_carcinoma	NS	NS	male		60	caucasian		Caucasian		lung_cancer	CCLE	GNF						NA	lung_NSC	lung_NSC	Lung:NSCLC_Adeno	95.0306	LUAD
EN_ENDOMETRIUM	ACH-000978	EN	primary	endometrium	NS	NS	NS	carcinoma	NS	NS	NS	female		50	asian	japan	Asian		Endometrial Cancer	CCLE	DSMZ	adherent epitheloid cells growing in monolayers	DMEM+20% FBS	NA	5% DMSO	50-80 hrs	93.9	endometrium	endometrium	Endometrium:Carcinoma	1022.28	UCEC
PK59_PANCREAS	ACH-000205	PK-59	primary	pancreas	NS	NS	NS	carcinoma	NS	NS	NS			NA			Asian		Pancreatic Cancer	CCLE	JCRB	Epithelial like	RPMI 1640+10%FBS	NA			53.8	pancreas	pancreas	Pancreas:Carcinoma	130.923	PAAD
SNB19_CENTRAL_NERVOUS_SYSTEM	ACH-001198	SNB-19	primary	central_nervous_system	brain	NS	NS	glioma	astrocytoma_Grade_IV	glioblastoma_multiforme	NS	male		47			Caucasian		brain_cancer	CCLE	NA	NA	NA	NA	NA	NA	NA	glioma	glioma	NA	NA	LGG
COLO741_SKIN	ACH-000582	COLO 741	metastasis	skin	NS	NS	NS	malignant_melanoma	NS	NS	NS	female		69			Caucasian	pelvic_wall	colon_carcinoma and melanoma	CCLE	GNF						NA	melanoma	melanoma	Skin:Melanoma	127.683	SKCM
HDMYZ_HAEMATOPOIETIC_AND_LYMPHOID_TISSUE	ACH-000190	HD-MY-Z	metastasis	haematopoietic_and_lymphoid_tissue	lymph_node	NS	NS	lymphoid_neoplasm	Hodgkin_lymphoma	NS	NS			29			Caucasian	pleura		CCLE		Variable morphology	RPMI-1640+10% FBS	NA	5%DMSO		43.6	lymphoma_Hodgkin	lymphoma_Hodgkin	Lymphoma:Hodgkin	105.113	NA
NCIH661_LUNG	ACH-000853	NCI-H661	metastasis	lung	NS	NS	NS	carcinoma	large_cell_carcinoma	NS	NS	male		43	caucasian		Caucasian	lymph_node	large_cell_lung_cancer	CCLE	ATCC	adherent	RPMI 1640+10%FBS	NA	5%DMSO		59.5	lung_NSC	lung_NSC	Lung:NSCLC_Large_Cell	209.126	NA
LNCAPCLONEFGC_PROSTATE	ACH-000977	LNCaP clone FGC	metastasis	prostate	NS	NS	NS	carcinoma	adenocarcinoma	NS	NS	male		50	caucasian		Caucasian	lymph_node	prostate_cancer	CCLE	NIBRI						53	prostate	prostate	Prostate:Carcinoma	826.003	PRAD
LS411N_LARGE_INTESTINE	ACH-000985	LS411N	primary	large_intestine	caecum	NS	NS	carcinoma	adenocarcinoma	NS	NS	male		32	caucasian		Caucasian			CCLE	ATCC	adherent epithelial	RPMI-1640+10% FBS	NA	5% DMSO		69.9	colorectal	colorectal	Colorectal:Carcinoma	1024.43	COAD/READ
HCC78_LUNG	ACH-000562	HCC-78	metastasis	lung	NS	NS	NS	carcinoma	adenocarcinoma	NS	NS	male		65	caucasian		Caucasian	pleura	lung_cancer	CCLE	DSMZ	Adhrent and aggregates; dt=60-70hrs	RPMI-1640+10%FBS	NA	10% DMSO	60-70 hrs	33	lung_NSC	lung_NSC	Lung:NSCLC_Adeno	101.689	LUAD
YKG1_CENTRAL_NERVOUS_SYSTEM	ACH-000570	YKG1	primary	central_nervous_system	temporal_lobe	NS	NS	glioma	astrocytoma_Grade_IV	glioblastoma_multiforme	NS	female		NA			Asian		Brain Cancer	CCLE	GNF						NA	glioma	glioma	CNS:Glioma_HighGrade	162.476	GBM
ESS1_ENDOMETRIUM	ACH-000913	ESS-1	primary	endometrium	NS	NS	NS	carcinoma	carcinosarcoma-malignant_mesodermal_mixed_tumour	NS	NS	female		76	caucasian		Caucasian			CCLE					5% DMSO	120hrs??	49.1	endometrium	endometrium	Endometrium:Others	369.373	UCEC
U251MG_CENTRAL_NERVOUS_SYSTEM	ACH-000232	U-251 MG	primary	central_nervous_system	brain	NS	NS	glioma	astrocytoma	NS	NS	male		NA			Caucasian		Brain Cancer	CCLE	GNF						NA	glioma	glioma	CNS:Glioma	78.373	GBM
TE11_OESOPHAGUS	ACH-000488	TE-11	primary	oesophagus	NS	NS	NS	carcinoma	squamous_cell_carcinoma	NS	NS			58			Asian			CCLE	GNF						NA	esophagus	esophagus	Oesophagus:Carcinoma	161.092	ESCA
KS1_CENTRAL_NERVOUS_SYSTEM	ACH-000631	KS-1	primary	central_nervous_system	brain	NS	NS	glioma	astrocytoma_Grade_IV	glioblastoma_multiforme	NS	female		NA			Asian			CCLE	GNF						NA	glioma	glioma	CNS:Glioma_HighGrade	181.714	GBM
HEC1A_ENDOMETRIUM	ACH-000954	HEC-1-A	primary	endometrium	NS	NS	NS	carcinoma	adenocarcinoma	NS	NS	female		71			Asian			CCLE	NIBRI						NA	endometrium	endometrium	Endometrium:Carcinoma	941.971	UCEC
TE1_OESOPHAGUS	ACH-000647	TE-1	primary	oesophagus	NS	NS	NS	carcinoma	squamous_cell_carcinoma	NS	NS	male		NA			Asian			CCLE	JCRB	Epithelial like	RPMI 1640+10%FBS	NA			94.3	esophagus	esophagus	Oesophagus:Carcinoma	181.47	ESCA
JHUEM2_ENDOMETRIUM	ACH-000909	JHUEM-2	primary	endometrium	NS	NS	NS	carcinoma	adenocarcinoma	NS	NS	female		62	asian		Asian		Endometrial Cancer	CCLE	GNF						NA	endometrium	endometrium	Endometrium:Carcinoma	353.06	UCEC
MOGGUVW_CENTRAL_NERVOUS_SYSTEM	ACH-001126	MOG-G-UVW	primary	central_nervous_system	brain	NS	NS	glioma	astrocytoma	NS	NS			NA			Caucasian			CCLE	NA	NA	NA	NA	NA	NA	NA	glioma	glioma	NA	NA	LGG
RERFLCAD1_LUNG	ACH-000791	RERF-LC-Ad1	primary	lung	NS	NS	NS	carcinoma	adenocarcinoma	NS	NS	male		70	asian		Asian			CCLE	HSRRB	ADHERENT	RPMI-1640+10% FBS	NA	5% DMSO		194.7	lung_NSC	lung_NSC	Lung:NSCLC_Adeno	211.771	LUAD
TE5_OESOPHAGUS	ACH-000408	TE-5	primary	oesophagus	NS	NS	NS	carcinoma	squamous_cell_carcinoma	NS	NS	female		73			Asian			CCLE	Riken	Epithelial-like	RPMI+10%FBS	NA	5%DMSO		NA	esophagus	esophagus	Oesophagus:Carcinoma	132.165	ESCA
KELLY_AUTONOMIC_GANGLIA	ACH-000259	KELLY	primary	autonomic_ganglia	NS	NS	NS	neuroblastoma	NS	NS	NS			NA			Caucasian		neuroblastoma	CCLE					5% DMSO		40.9	neuroblastoma	neuroblastoma	PNET:Neuroblastoma	94.7377	NB
NCIH1155_LUNG	ACH-000980	NCI-H1155	metastasis	lung	NS	NS	NS	carcinoma	large_cell_carcinoma	NS	NS	male		36	caucasian		Caucasian	lymph_node		CCLE	ATCC	clusters in suspension	DMEM:F12	plethora; see sheet	5% DMSO		53	lung_NSC	lung_NSC	Lung:NSCLC_Large_Cell	686.765	NA
TE15_OESOPHAGUS	ACH-000353	TE-15	primary	oesophagus	NS	NS	NS	carcinoma	squamous_cell_carcinoma	NS	NS	female		NA			Asian			CCLE	GNF						NA	esophagus	esophagus	Oesophagus:Carcinoma	131.406	ESCA
ABC1_LUNG	ACH-000528	ABC-1	primary	lung	NS	NS	NS	carcinoma	non_small_cell_carcinoma	NS	NS	male		47			Asian		lung_cancer	CCLE	HSRRB	Adherent; 0.25% TRYPSIN	EMEM+10% FBS	NA	5% DMSO		40.1229	lung_NSC	lung_NSC	Lung:NSCLC_Others	146.935	LUAD
8MGBA_CENTRAL_NERVOUS_SYSTEM	ACH-000137	8-MG-BA	primary	central_nervous_system	frontal_lobe	NS	NS	glioma	astrocytoma_Grade_IV	glioblastoma_multiforme	NS	female		54	african_american		Caucasian			CCLE	DSMZ	Adherent	EMEM + 20% FBS	NA	5% DMSO		43	glioma	glioma	CNS:Glioma_HighGrade	88.3376	GBM
NCIH1703_LUNG	ACH-000747	NCI-H1703	primary	lung	NS	NS	NS	carcinoma	adenocarcinoma	NS	NS	male		54	caucasian		Caucasian		lung_cancer	CCLE	ATCC	Adherent	RPMI+10%FBS	NA	5% DMSO		41.1	lung_NSC	lung_NSC	Lung:NSCLC_Squamous	166.678	LUSC
AGS_STOMACH	ACH-000880	AGS	primary	stomach	NS	NS	NS	carcinoma	adenocarcinoma	NS	NS	female		54	caucasian		Caucasian			CCLE	NIBRI						NA	stomach	stomach	Gastric:Carcinoma	279.173	STAD
QGP1_PANCREAS	ACH-000347	QGP-1	primary	pancreas	NS	NS	NS	carcinoma	NS	NS	NS	male		61	asian		Asian		Pancreatic Cancer	CCLE	HSRRB	adherent epithelial	RPMI-1640 + 10% FBS	NA	5%DMSO		92.1	pancreas	pancreas	Pancreas:Carcinoma	136.627	PAAD
DETROIT562_UPPER_AERODIGESTIVE_TRACT	ACH-000207	Detroit 562	metastasis	upper_aerodigestive_tract	pharynx	NS	NS	carcinoma	NS	NS	NS	female	adult	NA	caucasian		Caucasian	pleura		CCLE	ATCC				5%DMSO		60.6	upper_aerodigestive	upper_aerodigestive	Upper_Aerodigestive_Tract:Carcinoma	92.9684	HNSC
BT474_BREAST	ACH-000927	BT-474	primary	breast	NS	NS	NS	carcinoma	ductal_carcinoma	NS	NS	female		60	caucasian		Caucasian		breast_cancer	CCLE	NIBRI						NA	breast	breast	Breast:Carcinoma	359.641	BRCA
ACHN_KIDNEY	ACH-000046	ACHN	metastasis	kidney	NS	NS	NS	carcinoma	renal_cell_carcinoma	NS	NS	male		22	caucasian		Caucasian	pleura	kidney_cancer	CCLE	ATCC	Adherent	EMEM +10%FBS	NA	5% DMSO		284.1	kidney	kidney	Kidney:Carcinoma	68.1887	KIRC
LOVO_LARGE_INTESTINE	ACH-000950	LoVo	metastasis	large_intestine	colon	NS	NS	carcinoma	adenocarcinoma	NS	NS	male		56	caucasian		Caucasian	lymph_node	colorectal_cancer	CCLE	NIBRI						NA	colorectal	colorectal	Colorectal:Carcinoma	453.422	COAD/READ
NCIH1581_LUNG	ACH-000015	NCI-H1581	primary	lung	NS	NS	NS	carcinoma	large_cell_carcinoma	NS	NS	male		44	caucasian		Caucasian			CCLE	ATCC	Mixed	DMEM:F12	plethora; see sheet	5% DMSO		34.1	lung_NSC	lung_NSC	Lung:NSCLC_Large_Cell	105.485	NA
SCABER_URINARY_TRACT	ACH-000839	SCaBER	primary	urinary_tract	bladder	NS	NS	carcinoma	transitional_cell_carcinoma	NS	NS	male		58	african_american		African_american			CCLE	ATCC	Adherent epithelial	EMEM +10%FBS	2 mM L-Glutamine ; 1.5 g/L sodium bicarbonate; 0.1 mM NEAA; 1.0 mM sodium pyruvate	5%DMSO		52.6	urinary_tract	urinary_tract	Bladder:Carcinoma	173.171	BLCA
SKMEL30_SKIN	ACH-000810	SK-MEL-30	metastasis	skin	NS	NS	NS	malignant_melanoma	NS	NS	NS	male		67	caucasian		Caucasian	skin		CCLE	DSMZ	Adherent	RPMI-1640 + 10% FBS	NA	10%DMSO		41.6	melanoma	melanoma	Skin:Melanoma	180.577	SKCM
OVKATE_OVARY	ACH-000443	OVKATE	primary	ovary	NS	NS	NS	carcinoma	adenocarcinoma	NS	NS	female		40	asian		Asian		Ovarian Cancer	CCLE	NIBRI		RPMI-1640+10% FBS	NA	5% DMSO		96	ovary	ovary	Ovary:Carcinoma	NA	OV
22RV1_PROSTATE	ACH-000956	22Rv1	primary	prostate	NS	NS	NS	carcinoma	NS	NS	NS	male		NA			Caucasian		prostate_cancer	CCLE	ATCC	Adherent epithelial	RPMI-1640+10% FBS	NA	5%DMSO		58.4	prostate	prostate	Prostate:Carcinoma	539.831	PRAD
C32_SKIN	ACH-000580	C32	primary	skin	NS	NS	NS	malignant_melanoma	NS	NS	NS	male		53	caucasian		Caucasian			CCLE	ATCC	ADHERENT	EMEM+10%FBS	NA	5% DMSO		59	melanoma	melanoma	Skin:Melanoma	125.508	SKCM
PANC0327_PANCREAS	ACH-000139	Panc 03.27	primary	pancreas	NS	NS	NS	carcinoma	ductal_carcinoma	NS	NS	female		65	caucasian		Caucasian			CCLE	ATCC	ADHERENT EPITHELIAL;	RPMI-1640+15% FBS	10 UNITS/ML INSULIN	5% DMSO		85.9	pancreas	pancreas	Pancreas:Carcinoma	87.6417	PAAD
RPMI8226_HAEMATOPOIETIC_AND_LYMPHOID_TISSUE	ACH-000817	RPMI 8226	primary	haematopoietic_and_lymphoid_tissue	NS	NS	NS	lymphoid_neoplasm	plasma_cell_myeloma	NS	NS	male		61			African_american		myeloma	CCLE	ATCC	Lymphoblast, suspension	RPMI-1640+ 10% FBS	NA	5% DMSO		76.6	multiple_myeloma	multiple_myeloma	Lymphoma:Multiple_Myeloma	169.307	MM
DLD1_LARGE_INTESTINE	ACH-001061	DLD-1	primary	large_intestine	colon	NS	NS	carcinoma	adenocarcinoma	NS	NS	male		NA			Caucasian			CCLE	NA	NA	NA	NA	NA	NA	NA	colorectal	colorectal	NA	NA	COAD/READ
ES2_OVARY	ACH-000906	ES-2	primary	ovary	NS	NS	NS	carcinoma	clear_cell_carcinoma	NS	NS	female		47	african_american		Caucasian		ovarian_cancer	CCLE	ATCC	ADHERENT FIBROBLASTS	McCOY'S5A + 10%FBS	NA	5% DMSO		25.8	ovary	ovary	Ovary:Carcinoma	317.801	OV
NCIH1395_LUNG	ACH-000327	NCI-H1395	primary	lung	NS	NS	NS	carcinoma	adenocarcinoma	NS	NS	female		55	caucasian		Caucasian		lung_cancer	CCLE	ATCC	adherent	RPMI+10%FBS	NA	5% DMSO		94.2	lung_NSC	lung_NSC	Lung:NSCLC_Adeno	93.0621	LUAD
NCIH1781_LUNG	ACH-000379	NCI-H1781	metastasis	lung	NS	NS	NS	carcinoma	bronchioloalveolar_adenocarcinoma	NS	NS	female		66	caucasian		Caucasian	pleura		CCLE	ATCC	Adherent			5%DMSO		197.3	lung_NSC	lung_NSC	Lung:NSCLC_Adeno	89.942	LUAD
LS1034_LARGE_INTESTINE	ACH-000252	LS1034	primary	large_intestine	caecum	NS	NS	carcinoma	adenocarcinoma	NS	NS	male		54	caucasian		Caucasian			CCLE	ATCC	adherent epithelial	RPMI-1640+ 10% FBS	NA	5% DMSO		93.9	colorectal	colorectal	Colorectal:Carcinoma	80.7824	COAD/READ
G402_SOFT_TISSUE	ACH-000375	G-402	primary	soft_tissue	striated_muscle	kidney	NS	rhabdoid_tumour	NS	NS	NS	female		0.75	caucasian		Caucasian		renal_leiomyoblastoma	CCLE					5% DMSO		42.1	soft_tissue	soft_tissue	Soft_Tissue:Sarcoma_Rhabdoid	97.1261	SARC
NCIH146_LUNG	ACH-000506	NCI-H146	metastasis	lung	NS	NS	NS	carcinoma	small_cell_carcinoma	NS	NS	male		59	caucasian		Caucasian	pleura		CCLE	ATCC	Suspension; multicell aggregates	RPMI+10%FBS	NA	5%DMSO		123.4	lung_small_cell	lung_small_cell	Lung:SCLC	126.074	SCLC
SW48_LARGE_INTESTINE	ACH-000958	SW48	primary	large_intestine	colon	NS	NS	carcinoma	adenocarcinoma	NS	NS	female		82	caucasian		Caucasian			CCLE	NIBRI						NA	colorectal	colorectal	Colorectal:Carcinoma	563.71	COAD/READ
CHP212_AUTONOMIC_GANGLIA	ACH-000120	CHP-212	primary	autonomic_ganglia	NS	NS	NS	neuroblastoma	NS	NS	NS			NA			Caucasian		neuroblastoma	CCLE	NIBRI						93.8	neuroblastoma	neuroblastoma	PNET:Neuroblastoma	89.6093	NB
LS180_LARGE_INTESTINE	ACH-000957	LS 180	primary	large_intestine	colon	NS	NS	carcinoma	adenocarcinoma	NS	NS	female		58	caucasian		Caucasian		colon_cancer	CCLE	NA	NA	NA	NA	NA	NA	NA	colorectal	colorectal	Colorectal:Carcinoma	529.826	COAD/READ
SW403_LARGE_INTESTINE	ACH-000820	SW403	primary	large_intestine	colon	NS	NS	carcinoma	adenocarcinoma	NS	NS	female		51	caucasian		Caucasian			CCLE	NIBRI						NA	colorectal	colorectal	Colorectal:Carcinoma	177.371	COAD/READ
NCIH747_LARGE_INTESTINE	ACH-000403	NCI-H747	metastasis	large_intestine	caecum	NS	NS	carcinoma	adenocarcinoma	NS	NS	male		69	caucasian		Caucasian	lymph_node		CCLE	NIBRI						NA	colorectal	colorectal	Colorectal:Carcinoma	123.081	COAD/READ
RT4_URINARY_TRACT	ACH-000242	RT4	primary	urinary_tract	bladder	NS	NS	carcinoma	transitional_cell_carcinoma	papillary_transitional_cell_carcinoma	NS	male		63	caucasian		Caucasian			CCLE	ATCC	Adherent epithelial	McCoy's 5A +10%	NA	5%DMSO		103.6	urinary_tract	urinary_tract	Bladder:Carcinoma	89.0034	BLCA
KATOIII_STOMACH	ACH-000793	KATO III	metastasis	stomach	NS	NS	NS	carcinoma	adenocarcinoma	NS	NS	male		55	asian		Asian	pleura		CCLE	ATCC	Mixed adherent and suspension (spherical)	IMDM + 20%FBS		5%DMSO		48.7	stomach	stomach	Gastric:Carcinoma	213.451	STAD
BDCM_HAEMATOPOIETIC_AND_LYMPHOID_TISSUE	ACH-000080	BDCM	primary	haematopoietic_and_lymphoid_tissue	NS	NS	NS	lymphoid_neoplasm	acute_lymphoblastic_B_cell_leukaemia	NS	NS	male		NA			Caucasian		acute myelogenous leukemia M5a	CCLE	NIBRI						NA	B-cell_ALL	B-cell_ALL	Leukemia:ALL	83.2547	ALL
SW1417_LARGE_INTESTINE	ACH-000236	SW1417	primary	large_intestine	colon	sigmoid	NS	carcinoma	adenocarcinoma	NS	NS	female		53	caucasian		Caucasian			CCLE	NIBRI						NA	colorectal	colorectal	Colorectal:Carcinoma	93.4028	COAD/READ
SW948_LARGE_INTESTINE	ACH-000680	SW948	primary	large_intestine	colon	NS	NS	carcinoma	adenocarcinoma	NS	NS	female		81	caucasian		Caucasian			CCLE	NIBRI						NA	colorectal	colorectal	Colorectal:Carcinoma	145.629	COAD/READ
HS606T_FIBROBLAST	ACH-000540	Hs 606.T	primary	breast	NS	NS	NS	carcinoma	NS	NS	NS	female		44	caucasian		Caucasian		Breast Cancer	CCLE	ATCC	adherent fibroblast	DMEM+10% FBS	NA	5% DMSO		365	breast	fibroblast_like	NA	110.762	NA
MDAMB415_BREAST	ACH-000876	MDA-MB-415	metastasis	breast	NS	NS	NS	carcinoma	NS	NS	NS	female		38	caucasian		Caucasian	pleura	breast_adenocarcinoma	CCLE	ATCC	adherent epithelial	RPMI-1640 + 15% FBS	0.01 mg/ml insulin; 0.01 mg/ml glutathione	5%DMSO		184.8	breast	breast	Breast:Carcinoma	229.073	BRCA
DMS79_LUNG	ACH-000703	DMS 79	primary	lung	NS	NS	NS	carcinoma	small_cell_carcinoma	NS	NS			65	caucasian		Caucasian			CCLE	ATCC	Suspension; multicell aggregates	RPMI-1640+10%FBS	NA	5% DMSO		244	lung_small_cell	lung_small_cell	Lung:SCLC	154.163	SCLC
NCIH2106_LUNG	ACH-000904	NCI-H2106	metastasis	lung	NS	NS	NS	carcinoma	non_small_cell_carcinoma	NS	NS	male		58	caucasian		Caucasian	lymph_node		CCLE	GNF						NA	lung_NSC	lung_NSC	Lung:NSCLC_Others	259.793	NA
SW579_THYROID	ACH-000163	SW579	primary	thyroid	NS	NS	NS	carcinoma	anaplastic_carcinoma	NS	NS	male		59	caucasian		Caucasian		thyroid_squamous_cell_carcinoma	CCLE	GNF						45	thyroid	thyroid	Thyroid:Carcinoma	90.3075	THCA
MDAMB468_BREAST	ACH-000849	MDA-MB-468	metastasis	breast	NS	NS	NS	carcinoma	NS	NS	NS	female		51	african_american		African_american	pleura	breast_cancer	CCLE	ATCC	adherent epithelial	DMEM+10% FBS	NA	5% DMSO		63.5	breast	breast	Breast:Carcinoma	188.253	BRCA
NCIH526_LUNG	ACH-000767	NCI-H526	metastasis	lung	NS	NS	NS	carcinoma	small_cell_carcinoma	NS	NS	male		55	caucasian		Caucasian	bone_marrow	lung_cancer	CCLE	ATCC	round clusters in suspension	RPMI-1640+10%FBS	NA	5% DMSO		315	lung_small_cell	lung_small_cell	Lung:SCLC	178.835	SCLC
TOV112D_OVARY	ACH-000048	TOV-112D	primary	ovary	NS	NS	NS	carcinoma	endometrioid_carcinoma	NS	NS	female		42	caucasian	canada	Caucasian		endometrioid_carcinoma	CCLE	ATCC	adherent;	MCDB 105:MEDIUM 199 (1:1) +15% FBS	NA	5% DMSO		35.5	ovary	ovary	Ovary:Carcinoma	71.797	OV
BT549_BREAST	ACH-000288	BT-549	primary	breast	NS	NS	NS	carcinoma	ductal_carcinoma	papillary	NS	female		72	caucasian		Caucasian		breast_cancer	CCLE	ATCC	Adherent	RPMI + 10 % FBS	NA	5%DMSO		98.4	breast	breast	NA	100.468	BRCA
NCIH2196_LUNG	ACH-000399	NCI-H2196	metastasis	lung	NS	NS	NS	carcinoma	small_cell_carcinoma	NS	NS	male		67	caucasian		Caucasian	bone_marrow		CCLE	ATCC	Adherent	DMEM:F12+5% FBS	5ug/ml insulin, 10ug/ml transferrin, 30nM Na Selenite, 10nM Hydrocortisone, 10nM Beta-estradiol, 10mM HEPES, 2mM L-glutamine	5% DMSO		89.9	lung_small_cell	lung_small_cell	Lung:SCLC	102.006	SCLC
CAL851_BREAST	ACH-000857	CAL-85-1	primary	breast	NS	NS	NS	carcinoma	NS	NS	NS	female		35			Caucasian		breast_cancer	CCLE	DSMZ		DMEM+10% FBS	NA	5% DMSO		58.4	breast	breast	Breast:Carcinoma	176.843	BRCA
EFO21_OVARY	ACH-000308	EFO-21	metastasis	ovary	NS	NS	NS	carcinoma	serous_carcinoma	NS	NS	female		56	caucasian		Caucasian	ascites		CCLE	NIBRI						NA	ovary	ovary	Ovary:Carcinoma	104.592	OV
A375_SKIN	ACH-000219	A-375	primary	skin	NS	NS	NS	malignant_melanoma	NS	NS	NS	female		54			Caucasian			CCLE	ATCC	Adherent	DMEM +10%FBS	NA	5%DMSO		30.8	melanoma	melanoma	Skin:Melanoma	150.058	SKCM
HT29_LARGE_INTESTINE	ACH-000552	HT-29	primary	large_intestine	colon	NS	NS	carcinoma	adenocarcinoma	NS	NS	female		44	caucasian		Caucasian		colon_cancer	CCLE	NIBRI						NA	colorectal	colorectal	Colorectal:Carcinoma	110.863	COAD/READ
NCIH446_LUNG	ACH-000800	NCI-H446	metastasis	lung	NS	NS	NS	carcinoma	small_cell_carcinoma	NS	NS	male		61	caucasian		Caucasian	pleura		CCLE	ATCC	Mixed; adherent and suspension	RPMI-1640+10%FBS	NA	5% DMSO		294	lung_small_cell	lung_small_cell	Lung:SCLC	177.01	SCLC
HS294T_SKIN	ACH-000014	Hs 294T	metastasis	skin	NS	NS	NS	malignant_melanoma	NS	NS	NS	male		56	caucasian		Caucasian	lymph_node	melanoma	CCLE	ATCC	Adherent	DMEM +10%FBS	NA	5%DMSO		67.5	melanoma	melanoma	Skin:Melanoma	73.8134	SKCM
SKMEL5_SKIN	ACH-000730	SK-MEL-5	metastasis	skin	NS	NS	NS	malignant_melanoma	NS	NS	NS	female		24	caucasian		Caucasian	axillary_node	skin_cancer	CCLE	NIBRI						NA	melanoma	melanoma	Skin:Melanoma	138.446	SKCM
HS944T_SKIN	ACH-000632	Hs 944.T	metastasis	skin	NS	NS	NS	malignant_melanoma	NS	NS	NS	male		51	caucasian		Caucasian	lymph_node		CCLE	NIBRI						NA	melanoma	melanoma	Skin:Melanoma	111.464	SKCM
TCCPAN2_PANCREAS	ACH-000502	TCC-PAN2	primary	pancreas	NS	NS	NS	carcinoma	NS	NS	NS	female		68	asian		Asian		Pancreatic Cancer	CCLE	HSRRB	adherent epithelial	RPMI-1640 + 10% FBS	NA	5%DMSO		83.3	pancreas	pancreas	Pancreas:Carcinoma	181.227	PAAD
DOV13_OVARY	ACH-001063	DOV13	primary	ovary	NS	NS	NS	carcinoma	NS	NS	NS	female		NA			Caucasian		Ovarian Cancer	CCLE	Acd Lab	Suspension	RPMI-1640+10%FBS	NA	5%DMSO		29	ovary	ovary	Ovary:Carcinoma	NA	OV
RMGI_OVARY	ACH-000719	RMG-I	primary	ovary	NS	NS	NS	carcinoma	clear_cell_carcinoma	NS	NS	female		34			Asian			CCLE	NIBRI						NA	ovary	ovary	Ovary:Carcinoma	217.414	OV
PC3_PROSTATE	ACH-000090	PC-3	metastasis	prostate	NS	NS	NS	carcinoma	adenocarcinoma	NS	NS	male		62	caucasian		Caucasian	bone	prostate_cancer	CCLE	ATCC	ADHERENT EPITHELIAL;	F-12 +10%FBS	NA	5% DMSO		42.3	prostate	prostate	Prostate:Carcinoma	80.1939	PRAD
K562_HAEMATOPOIETIC_AND_LYMPHOID_TISSUE	ACH-000551	K-562	metastasis	haematopoietic_and_lymphoid_tissue	NS	NS	NS	haematopoietic_neoplasm	blast_phase_chronic_myeloid_leukaemia	Ph_positive	NS	female		53			Caucasian	pleura	leukaemia	CCLE	ATCC	SUSPENSION	RPMI-1640+10%FBS	10mM L-GLUTAMINE	5%DMSO		53.2	CML	CML	Leukemia:CML	131.284	LCML
RT112_URINARY_TRACT	ACH-000473	RT-112	primary	urinary_tract	bladder	NS	NS	carcinoma	transitional_cell_carcinoma	NS	NS	female		NA			Caucasian			CCLE	DSMZ	Adherent	RPMI +10%FBS	NA	5%DMSO		36.1	urinary_tract	urinary_tract	Bladder:Carcinoma	116.349	BLCA
NUGC3_STOMACH	ACH-000911	NUGC-3	primary	stomach	NS	NS	NS	carcinoma	NS	NS	NS	male		72			Asian			CCLE	JHSF	Epithelial-like	RPMI1640+10%FBS	NA	5%DMSO		34.2	stomach	stomach	Gastric:Carcinoma	334.91	STAD
U87MG_CENTRAL_NERVOUS_SYSTEM	ACH-000075	U-87 MG	primary	central_nervous_system	brain	NS	NS	glioma	astrocytoma	NS	NS	female		44	caucasian		Caucasian		brain_cancer	CCLE	ATCC	Adherent epithelial.	EMEM + 10% FBS	NA	5%DMSO		66	glioma	glioma	CNS:Glioma	88.6801	GBM
CAKI2_KIDNEY	ACH-000234	Caki-2	primary	kidney	NS	NS	NS	carcinoma	clear_cell_renal_cell_carcinoma	NS	NS	male		69	caucasian		Caucasian			CCLE	NIBRI						NA	kidney	kidney	Kidney:Carcinoma	97.3344	KIRC
OE19_OESOPHAGUS	ACH-000679	OE19	primary	oesophagus	lower_third	NS	NS	carcinoma	adenocarcinoma	NS	NS	male		72			Caucasian			CCLE	HPACC	AHERENT EPITHELIAL;	RPMI-1640+10%FBS	2mM l-GLUTAMINE	5%DMSO		78.3	esophagus	esophagus	Oesophagus:Carcinoma	153.313	ESCA
KMRC2_KIDNEY	ACH-000709	KMRC-2	primary	kidney	NS	NS	NS	carcinoma	clear_cell_renal_cell_carcinoma	NS	NS	male		NA	asian		Asian		Kidney Cancer	CCLE	HSRRB		DMEM+10% FBS	NA	5% DMSO		113.3	kidney	kidney	Kidney:Carcinoma	207.744	KIRC
JHH2_LIVER	ACH-000577	JHH-2	metastasis	liver	NS	NS	NS	carcinoma	hepatocellular_carcinoma	NS	NS	male		57	asian	japan	Asian	ascites		CCLE	HSRRB	Adherent	EMEM +10 % FBS	NA	5%DMSO		99.1	liver	liver	Liver:HCC	200.167	LIHC
IM95_STOMACH	ACH-000919	IM95	primary	stomach	NS	NS	NS	carcinoma	intestinal_adenocarcinoma	NS	NS	male		63	asian	japan	Asian			CCLE	HSRRB	Adherent	DMEM +10%FBS	10mg/L insulin	5% DMSO		40.2	stomach	stomach	Gastric:Carcinoma	387.654	STAD
MV411_HAEMATOPOIETIC_AND_LYMPHOID_TISSUE	ACH-000045	MV-4-11	primary	haematopoietic_and_lymphoid_tissue	lymph_node	NS	NS	haematopoietic_neoplasm	acute_myeloid_leukaemia	M5	NS	male		10			Caucasian		leukaemia	CCLE	ATCC	suspension	IMDM+10% FBS	NA	5% DMSO		55.2	AML	AML	Leukemia:AML	70.0783	LAML
WM2664_SKIN	ACH-001239	WM-266-4	metastasis	skin	NS	NS	NS	malignant_melanoma	NS	NS	NS	female		58			Caucasian	skin	melanoma	CCLE	ATCC	Adherent	EMEM + 10% FBS	NA	5%DMSO		38.7	melanoma	melanoma	Skin:Melanoma	123.353	SKCM
KMRC1_KIDNEY	ACH-000684	KMRC-1	primary	kidney	NS	NS	NS	carcinoma	clear_cell_renal_cell_carcinoma	NS	NS	male		NA			Asian		Kidney Cancer	CCLE	HSRRB		DMEM+10% FBS	NA	5% DMSO		46.4	kidney	kidney	Kidney:Carcinoma	204.675	KIRC
KM12_LARGE_INTESTINE	ACH-000969	KM12	primary	large_intestine	colon	NS	NS	carcinoma	adenocarcinoma	NS	NS			NA			Caucasian		colon_cancer	CCLE	NIBRI						NA	colorectal	colorectal	NA	558.244	COAD/READ
COLO849_SKIN	ACH-001045	COLO-849	metastasis	skin	NS	NS	NS	malignant_melanoma	NS	NS	NS	male		43	caucasian		Caucasian	lymph_node	Skin Cancer	CCLE	NA	NA	NA	NA	NA	NA	NA	melanoma	melanoma	NA	NA	SKCM
T84_LARGE_INTESTINE	ACH-000381	T84	metastasis	large_intestine	colon	NS	NS	carcinoma	adenocarcinoma	NS	NS	male		72			Caucasian	lung		CCLE	NIBRI						NA	colorectal	colorectal	Colorectal:Carcinoma	101.516	COAD/READ
CALU1_LUNG	ACH-000511	Calu-1	metastasis	lung	NS	NS	NS	carcinoma	squamous_cell_carcinoma	NS	NS	male		47	caucasian		Caucasian	pleura	lung_cancer	CCLE	NIBRI						NA	lung_NSC	lung_NSC	Lung:NSCLC_Squamous	120.705	LUSC
LOXIMVI_SKIN	ACH-000750	LOX IMVI	primary	skin	NS	NS	NS	malignant_melanoma	NS	NS	NS	male		58			Caucasian		skin_cancer	CCLE	NCI/DCTD		RPMI-1640+10% FBS	NA	5% DMSO		29.3	melanoma	melanoma	Skin:Melanoma	159.042	SKCM
NCIH2170_LUNG	ACH-000481	NCI-H2170	primary	lung	NS	NS	NS	carcinoma	squamous_cell_carcinoma	NS	NS	male		NA			Caucasian			CCLE		MIXED	RPMI1640+10%FBS	NA	5%DMSO		68.7	lung_NSC	lung_NSC	Lung:NSCLC_Squamous	120.027	LUSC
SQ1_LUNG	ACH-000553	Sq-1	primary	lung	NS	NS	NS	carcinoma	squamous_cell_carcinoma	NS	NS			NA			Asian		Lung Cancer	CCLE	RIKEN		RPMI-1640+10%FBS	NA	5% DMSO		63.9	lung_NSC	lung_NSC	Lung:NSCLC_Squamous	166.331	LUSC
AN3CA_ENDOMETRIUM	ACH-000940	AN3 CA	metastasis	endometrium	NS	NS	NS	carcinoma	adenocarcinoma	NS	NS	female		55	caucasian		Caucasian	lymph_node		CCLE	ATCC	Adherent epithelial	EMEM + 10% FBS	NA	5% DMSO		88.9	endometrium	endometrium	Endometrium:Carcinoma	485.286	UCEC
NCIH2444_LUNG	ACH-000186	NCI-H2444	primary	lung	NS	NS	NS	carcinoma	non_small_cell_carcinoma	NS	NS	male		NA			Caucasian			CCLE	ATCC	Adherent	RPMI-1640+10% FBS	NA	5%DMSO		116	lung_NSC	lung_NSC	Lung:NSCLC_Others	84.9371	UNABLE TO CLASSIFY
UACC257_SKIN	ACH-000579	UACC-257	primary	skin	NS	NS	NS	malignant_melanoma	NS	NS	NS			NA			Caucasian		melanoma	CCLE	NCI/DCTD		RPMI-1640+10% FBS	NA	5% DMSO		40.9	melanoma	melanoma	Skin:Melanoma	116.35	SKCM
KYSE510_OESOPHAGUS	ACH-000824	KYSE-510	primary	oesophagus	upper_third	NS	NS	carcinoma	squamous_cell_carcinoma	NS	NS	female		67	asian	japan	Asian			CCLE	GNF					~ 30 hrs	NA	esophagus	esophagus	Oesophagus:Carcinoma	200.067	ESCA
MOLM13_HAEMATOPOIETIC_AND_LYMPHOID_TISSUE	ACH-000362	MOLM-13	primary	haematopoietic_and_lymphoid_tissue	NS	NS	NS	haematopoietic_neoplasm	acute_myeloid_leukaemia	M5a	NS	male		20			Asian		Leukemia	CCLE	DSMZ	suspension; dt=50hrs	RPMI-1640+20%FBS	NA	5% DMSO	50 hrs	60.6	AML	AML	Leukemia:AML	147.479	LAML
HUPT4_PANCREAS	ACH-000213	HUP-T4	metastasis	pancreas	NS	NS	NS	carcinoma	NS	NS	NS	male		60	asian	japan	Asian	ascites		CCLE	DSMZ	mixed	MEM + 10 % FBS	NA	5%DMSO		440	pancreas	pancreas	Pancreas:Carcinoma	144.733	PAAD
MOGGCCM_CENTRAL_NERVOUS_SYSTEM	ACH-001125	MOG-G-CCM	primary	central_nervous_system	brain	NS	NS	glioma	astrocytoma	NS	NS			NA			Caucasian			CCLE	NA	NA	NA	NA	NA	NA	NA	glioma	glioma	NA	NA	LGG
KYSE30_OESOPHAGUS	ACH-000777	KYSE-30	primary	oesophagus	NS	NS	NS	carcinoma	squamous_cell_carcinoma	NS	NS	male		64	asian	japan	Asian		Esophageal Cancer	CCLE	GNF					~ 30 hrs	NA	esophagus	esophagus	Oesophagus:Carcinoma	188.095	ESCA
KYSE150_OESOPHAGUS	ACH-000855	KYSE-150	primary	oesophagus	upper_third	NS	NS	carcinoma	squamous_cell_carcinoma	NS	NS	female		49	asian	japan	Asian			CCLE	DSMZ	Epithelial adherent monolayer	RPMI:Ham F12 +5%FBS	NA	10%DMSO		40	esophagus	esophagus	Oesophagus:Carcinoma	248.111	ESCA
PSN1_PANCREAS	ACH-000320	PSN1	primary	pancreas	NS	NS	NS	carcinoma	ductal_carcinoma	NS	NS			NA			Asian			CCLE	ECACC	adherent epithelial	RPMI-1640 + 10% FBS	2mM Glutamine	5%DMSO		40.9	pancreas	pancreas	Pancreas:Carcinoma	137.857	PAAD
NCIH1299_LUNG	ACH-000510	NCI-H1299	metastasis	lung	NS	NS	NS	carcinoma	non_small_cell_carcinoma	NS	NS	male		43	caucasian		Caucasian	lymph_node	lung_cancer	CCLE	ATCC	Adherent	RPMI-1640+10%FBS	NA	5% DMSO		47.4	lung_NSC	lung_NSC	Lung:NSCLC_Others	136.184	NA
PATU8988T_PANCREAS	ACH-000023	PA-TU-8988T	metastasis	pancreas	NS	NS	NS	carcinoma	ductal_carcinoma	NS	NS	female		64			Caucasian	liver		CCLE	GNF						NA	pancreas	pancreas	Pancreas:Carcinoma	91.4012	PAAD
IGR37_SKIN	ACH-000650	IGR-37	metastasis	skin	NS	NS	NS	malignant_melanoma	NS	NS	NS	male		26			Caucasian	lymph_node	Skin Cancer	CCLE	NIBRI						39.4	melanoma	melanoma	Skin:Melanoma	128.214	SKCM
LN443_CENTRAL_NERVOUS_SYSTEM	ACH-000673	LN-443		central_nervous_system	brain	NS	NS	glioma	astrocytoma_Grade_IV	NS	NS	male		NA	NA	NA	Caucasian	NA	NA	COSMIC	NA	NA	NA	NA	NA	NA	NA	glioma	glioma	NA	160.755	NA
SLR23_KIDNEY	ACH-000246	SLR 23	primary	kidney	NS	NS	NS	carcinoma	renal_cell_carcinoma	NS	NS			NA			Caucasian			collaborator	NA	NA	NA	NA	NA	NA	NA	kidney	kidney	NA	NA	KIRC
HMEL_BREAST	ACH-000642	HMEL		breast	NS	NS	NS	other	immortalized_epithelial	NS	NS			NA			African_american			ACHILLES	NA	NA	NA	NA	NA	NA	NA	breast	breast	NA	136.531	BRCA
OELE_OVARY	ACH-000494	OELE		ovary	NS	NS	NS	other	immortalized_epithelial	NS	NS			NA			Caucasian			ACHILLES	NA	NA	NA	NA	NA	NA	NA	ovary	ovary	NA	115.991	OV
LN235_CENTRAL_NERVOUS_SYSTEM	ACH-000591	LN-235		central_nervous_system	brain	NS	NS	glioma	astrocytoma_Grade_IV	NS	NS	male		NA	NA	NA	Caucasian	NA	NA	COSMIC	NA	NA	NA	NA	NA	NA	NA	glioma	glioma	NA	117.9	NA
BJHTERT_SKIN	ACH-001018	BJ hTERT		skin	foreskin	NS	NS	other	immortalized_fibroblast	NS	NS			NA			NA			ACHILLES	NA	NA	NA	NA	NA	NA	NA	melanoma	fibroblast_like	NA	NA	NA
LN428_CENTRAL_NERVOUS_SYSTEM	ACH-000455	LN-428		central_nervous_system	brain	NS	NS	glioma	astrocytoma_Grade_IV	NS	NS	male		NA	NA	NA	Caucasian	NA	NA	COSMIC	NA	NA	NA	NA	NA	NA	NA	glioma	glioma	NA	115.146	NA
SLR24_KIDNEY	ACH-000272	SLR 24	primary	kidney	NS	NS	NS	carcinoma	renal_cell_carcinoma	NS	NS			NA			Caucasian			collaborator	NA	NA	NA	NA	NA	NA	NA	kidney	kidney	NA	NA	KIRC
EWS502_BONE	ACH-000279	EWS502		bone	NS	NS	NS	Ewings_sarcoma-peripheral_primitive_neuroectodermal_tumour	NS	NS	NS			NA			Caucasian			ACHILLES	NA	NA	NA	NA	NA	NA	NA	Ewings_Sarcoma	Ewings_sarcoma	NA	103.343	NA
SALE_LUNG	ACH-000064	SALE		lung	NS	NS	NS	other	immortalized_epithelial	NS	NS			NA			Caucasian			ACHILLES	NA	NA	NA	NA	NA	NA	NA	NA	other	NA	90.369	NA
HCC2814_LUNG	ACH-000690	HCC-2814		lung	NS	NS	NS	carcinoma	squamous_cell_carcinoma	NS	NS			NA			Caucasian			ACHILLES	NA	NA	NA	NA	NA	NA	NA	lung_NSC	lung_NSC	NA	136.488	NA
SKRC31_KIDNEY	ACH-001194	SK-RC 31	primary	kidney	NS	NS	NS	carcinoma	renal_cell_carcinoma	NS	NS			NA			NA			collaborator	NA	NA	NA	NA	NA	NA	NA	kidney	kidney	NA	NA	KIRC
TIG3TD_FIBROBLAST	ACH-001207	TIG-3 TD		lung	NS	NS	NS	other	immortalized_embryonic_fibroblast	NS	NS			NA			NA			ACHILLES	NA	NA	NA	NA	NA	NA	NA	NA	fibroblast_like	NA	167.765	NA
TC32_BONE	ACH-001205	TC-32		bone	NS	NS	NS	Ewings_sarcoma-peripheral_primitive_neuroectodermal_tumour	NS	NS	NS	female		NA	NA	NA	NA	NA	NA	COSMIC	NA	NA	NA	NA	NA	NA	NA	Ewings_Sarcoma	Ewings_sarcoma	NA	NA	NA
SF172_CENTRAL_NERVOUS_SYSTEM	ACH-000887	SF-172		central_nervous_system	brain	NS	NS	glioma	astrocytoma_Grade_IV	glioblastoma_multiforme	NS	female		NA			NA			ACHILLES	NA	NA	NA	NA	NA	NA	NA	glioma	glioma	NA	268.487	NA
PRECLH_PROSTATE	ACH-000170	PrEC LH		prostate	NS	NS	NS	other	immortalized_epithelial	NS	NS			NA			Caucasian			ACHILLES	NA	NA	NA	NA	NA	NA	NA	prostate	prostate	NA	64.4491	PRAD
U343_CENTRAL_NERVOUS_SYSTEM	ACH-000036	U343		central_nervous_system	NS	NS	NS	glioma	astrocytoma_Grade_III	NS	NS			NA			Caucasian			ACHILLES	NA	NA	NA	NA	NA	NA	NA	glioma	glioma	NA	116.67	NA
RCC4_KIDNEY	ACH-001175	RCC-4		kidney	NS	NS	NS	carcinoma	clear_cell_renal_cell_carcinoma	NS	NS			NA	NA	NA	NA	NA	NA	COSMIC	NA	NA	NA	NA	NA	NA	NA	kidney	kidney	NA	NA	KIRC
LN215_CENTRAL_NERVOUS_SYSTEM	ACH-000328	LN-215		central_nervous_system	brain	NS	NS	glioma	astrocytoma_Grade_IV	NS	NS			NA	NA	NA	Caucasian	NA	NA	COSMIC	NA	NA	NA	NA	NA	NA	NA	glioma	glioma	NA	108.022	NA
LN464_CENTRAL_NERVOUS_SYSTEM	ACH-000676	LN-464		central_nervous_system	brain	NS	NS	glioma	astrocytoma_Grade_IV	NS	NS	male		NA	NA	NA	Caucasian	NA	NA	COSMIC	NA	NA	NA	NA	NA	NA	NA	glioma	glioma	NA	126.625	NA
SLR25_KIDNEY	ACH-000300	SLR 25	primary	kidney	NS	NS	NS	carcinoma	renal_cell_carcinoma	NS	NS			NA			Caucasian			collaborator	NA	NA	NA	NA	NA	NA	NA	kidney	kidney	NA	NA	KIRC
U178_CENTRAL_NERVOUS_SYSTEM	ACH-000208	U-178		central_nervous_system	brain	NS	NS	glioma	astrocytoma_Grade_IV	glioblastoma_multiforme	NS	male		NA			Caucasian			ACHILLES	NA	NA	NA	NA	NA	NA	NA	glioma	glioma	NA	NA	NA
F5_CENTRAL_NERVOUS_SYSTEM	ACH-001067	F5		central_nervous_system	meninges	NS	NS	meningioma	NS	NS	NS	male		NA			NA			ACHILLES	NA	NA	NA	NA	NA	NA	NA	meningioma	meningioma	NA	NA	NA
HEKTE_KIDNEY	ACH-000049	HEK TE		kidney	NS	NS	NS	other	immortalized_epithelial	NS	NS			NA			Caucasian			ACHILLES	NA	NA	NA	NA	NA	NA	NA	kidney	kidney	NA	69.8903	KIRC
SLR26_KIDNEY	ACH-000600	SLR 26	primary	kidney	NS	NS	NS	carcinoma	renal_cell_carcinoma	NS	NS			NA			Caucasian			collaborator	NA	NA	NA	NA	NA	NA	NA	kidney	kidney	NA	128.633	KIRC
SKRC20_KIDNEY	ACH-000385	SK-RC-20		kidney	NS	NS	NS	carcinoma	clear_cell_renal_cell_carcinoma	NS	NS			NA			Caucasian			ACHILLES	NA	NA	NA	NA	NA	NA	NA	kidney	kidney	NA	94.2529	KIRC
SF767_CERVIX	ACH-000490	SF767		central_nervous_system	NS	NS	NS	glioma	astrocytoma_Grade_III-IV	NS	NS	female		NA			Caucasian			ACHILLES	NA	NA	NA	NA	NA	NA	NA	glioma	cervix	NA	115.886	CESC
A1207_CENTRAL_NERVOUS_SYSTEM	ACH-000283	A1207		central_nervous_system	NS	NS	NS	glioma	NS	NS	NS	female		NA			Caucasian			ACHILLES	NA	NA	NA	NA	NA	NA	NA	glioma	glioma	NA	NA	NA
LN319_CENTRAL_NERVOUS_SYSTEM	ACH-000128	LN-319		central_nervous_system	brain	NS	NS	glioma	astrocytoma_Grade_III	NS	NS	male		NA	NA	NA	Caucasian	NA	NA	COSMIC	NA	NA	NA	NA	NA	NA	NA	glioma	glioma	NA	73.4234	NA
HCC364_LUNG	ACH-000575	HCC364		lung	NS	NS	NS	carcinoma	adenocarcinoma	NS	NS			NA			Caucasian			ACHILLES	NA	NA	NA	NA	NA	NA	NA	lung_NSC	lung_NSC	NA	125.344	NA
UMRC6_KIDNEY	ACH-001225	UMRC6	primary	kidney	NS	NS	NS	carcinoma	renal_cell_carcinoma	NS	NS			NA			NA			collaborator	NA	NA	NA	NA	NA	NA	NA	kidney	kidney	NA	NA	KIRC
LN382_CENTRAL_NERVOUS_SYSTEM	ACH-000215	LN382		central_nervous_system	NS	NS	NS	glioma	astrocytoma_Grade_IV	NS	NS	male		NA			Caucasian			ACHILLES	NA	NA	NA	NA	NA	NA	NA	glioma	glioma	NA	87.2364	NA
IOMMLEE_CENTRAL_NERVOUS_SYSTEM	ACH-000629	IOMM-Lee		central_nervous_system	meninges	NS	NS	meningioma	NS	NS	NS			NA			Asian			ACHILLES	NA	NA	NA	NA	NA	NA	NA	meningioma	meningioma	NA	166.477	NA
UMRC2_KIDNEY	ACH-001224	UMRC2		kidney	NS	NS	NS	carcinoma	clear_cell_renal_cell_carcinoma	NS	NS			NA	NA	NA	NA	NA	NA	COSMIC	NA	NA	NA	NA	NA	NA	NA	kidney	kidney	NA	NA	KIRC
DFCI024_LUNG	ACH-001058	DFCI024		lung	NS	NS	NS	carcinoma	non_small_cell_carcinoma	NS	NS			NA			NA			ACHILLES	NA	NA	NA	NA	NA	NA	NA	lung_NSC	lung_NSC	NA	NA	NA
HCC1897_LUNG	ACH-001079	HCC-1897		lung	NS	NS	NS	carcinoma	squamous_cell_carcinoma	NS	NS			NA			NA			ACHILLES	NA	NA	NA	NA	NA	NA	NA	lung_NSC	lung_NSC	NA	NA	NA
SLR21_KIDNEY	ACH-000016	SLR 21	primary	kidney	NS	NS	NS	carcinoma	renal_cell_carcinoma	NS	NS			NA			Caucasian			collaborator	NA	NA	NA	NA	NA	NA	NA	kidney	kidney	NA	88.3068	KIRC
LNZ308_CENTRAL_NERVOUS_SYSTEM	ACH-000760	LNZ308		central_nervous_system	NS	NS	NS	glioma	astrocytoma_Grade_IV	NS	NS	female		NA			Caucasian			ACHILLES	NA	NA	NA	NA	NA	NA	NA	glioma	glioma	NA	152.986	LGG
LN340_CENTRAL_NERVOUS_SYSTEM	ACH-000634	LN-340		central_nervous_system	brain	NS	NS	glioma	astrocytoma_Grade_IV	NS	NS	male		NA	NA	NA	Caucasian	NA	NA	COSMIC	NA	NA	NA	NA	NA	NA	NA	glioma	glioma	NA	133.539	NA
HCC827GR5_LUNG	ACH-000029	HCC827 GR5		lung	NS	NS	NS	carcinoma	non_small_cell_carcinoma	NS	NS			NA			Caucasian			ACHILLES	NA	NA	NA	NA	NA	NA	NA	lung_NSC	lung_NSC	NA	102.795	NA
SLR20_KIDNEY	ACH-000127	SLR 20	primary	kidney	NS	NS	NS	carcinoma	renal_cell_carcinoma	NS	NS			NA			Caucasian			collaborator	NA	NA	NA	NA	NA	NA	NA	kidney	kidney	NA	121.238	KIRC
HK2_KIDNEY	ACH-001087	HK-2		kidney	NS	NS	NS	other	immortalized_epithelial	NS	NS			NA			NA			ACHILLES	NA	NA	NA	NA	NA	NA	NA	kidney	kidney	NA	NA	KIRC
EW8_BONE	ACH-000499	EW8		bone	NS	NS	NS	Ewings_sarcoma-peripheral_primitive_neuroectodermal_tumour	NS	NS	NS			NA			Caucasian			ACHILLES	NA	NA	NA	NA	NA	NA	NA	Ewings_Sarcoma	Ewings_sarcoma	NA	119.184	NA
UOK101_KIDNEY	ACH-000262	UOK101		kidney	NS	NS	NS	carcinoma	clear_cell_renal_cell_carcinoma	NS	NS	female		NA			Caucasian			ACHILLES	NA	NA	NA	NA	NA	NA	NA	kidney	kidney	NA	92.0377	KIRC
JHESOAD1_OESOPHAGUS	ACH-000216	JH-EsoAd1		oesophagus	NS	NS	NS	carcinoma	barrett_associated_adenocarcinoma	NS	NS	male		NA			NA			ACHILLES	NA	NA	NA	NA	NA	NA	NA	NA	esophagus	NA	80.6462	ESCA
CH157MN_CENTRAL_NERVOUS_SYSTEM	ACH-000025	CH-157MN		central_nervous_system	meninges	NS	NS	meningioma	NS	NS	NS			NA			Caucasian			ACHILLES	NA	NA	NA	NA	NA	NA	NA	meningioma	meningioma	NA	78.0385	NA
MOLP2_HAEMATOPOIETIC_AND_LYMPHOID_TISSUE	ACH-000453	MOLP-2	primary	haematopoietic_and_lymphoid_tissue	NS	NS	NS	lymphoid_neoplasm	plasma_cell_myeloma	NS	NS	male		55			Asian			CCLE	DSMZ	round to polymorph cells growing singly or in small clumps	RPMI-1640+20% FBS	NA	5%DMSO	4 days	310.4	multiple_myeloma	multiple_myeloma	Lymphoma:Multiple_Myeloma	147.78	MM
SCC25_UPPER_AERODIGESTIVE_TRACT	ACH-000188	SCC-25	primary	upper_aerodigestive_tract	mouth	tongue	NS	carcinoma	squamous_cell_carcinoma	NS	NS	male		70			Caucasian			CCLE	NIBRI						NA	upper_aerodigestive	upper_aerodigestive	Upper_Aerodigestive_Tract:Carcinoma	99.7408	HNSC
UT7_HAEMATOPOIETIC_AND_LYMPHOID_TISSUE	ACH-001230	UT-7	primary	haematopoietic_and_lymphoid_tissue	NS	NS	NS	haematopoietic_neoplasm	acute_myeloid_leukaemia	M7	NS	male		64			Asian			CCLE	NA	NA	NA	NA	NA	NA	NA	AML	AML	NA	NA	LAML
MHHNB11_AUTONOMIC_GANGLIA	ACH-000078	MHH-NB-11	metastasis	autonomic_ganglia	NS	NS	NS	neuroblastoma	NS	NS	NS	male		4	caucasian		Caucasian	adrenal		CCLE	DSMZ	adherent, fibroblast-like cells growing as monolayers	90% RPMI 1640 +10% h. i. FBS	2mM L -glutamine +MEM non-essential amino acids		~ 100 hrs	NA	neuroblastoma	neuroblastoma	PNET:Neuroblastoma	94.7212	NB
HCC1806_BREAST	ACH-000624	HCC1806	primary	breast	NS	NS	NS	carcinoma	ductal_carcinoma	squamous_cell_carcinoma	NS	female		60	african_american		African_american		breast_cancer	CCLE	NIBRI						NA	breast	breast	Breast:Carcinoma	134.931	BRCA
GRANTA519_HAEMATOPOIETIC_AND_LYMPHOID_TISSUE	ACH-000073	GRANTA-519	primary	haematopoietic_and_lymphoid_tissue	NS	NS	NS	lymphoid_neoplasm	mantle_cell_lymphoma	NS	NS	female		58	caucasian		Caucasian		mantle_cell_lymphoma	CCLE	DSMZ	spheroid cells growing in suspention, singly or in clumps	90% Dulbecco's MEM(4.5 g/L glucose) +10% h.i.FBS	2mM L-glutamine		~ 49 hrs	NA	lymphoma_other	B-cell_lymphoma_other	Lymphoma:NH_B_cell	73.8651	DLBC
MONOMAC6_HAEMATOPOIETIC_AND_LYMPHOID_TISSUE	ACH-000006	MONO-MAC-6	primary	haematopoietic_and_lymphoid_tissue	NS	NS	NS	haematopoietic_neoplasm	acute_myeloid_leukaemia	M5	NS	male		64			Caucasian			CCLE	DSMZ	single, round/ multiformed cells or small clusters of cells in suspention, sometimes loosely adherent; 1-5% giant cells	90% RPMI 1640 +10% h.i. FBS	2mM L-glutamine + non-essential amino acids +1 mM sodium pyruvate + 10ug/ml human insulin		~ 60 hrs	55.3	AML	AML	Leukemia:AML	77.0652	LAML
MKN7_STOMACH	ACH-000678	MKN7	metastasis	stomach	NS	NS	NS	carcinoma	tubular_adenocarcinoma	NS	NS	male		39	asian	japan	Asian	lymph_node		CCLE	GNF						NA	stomach	stomach	Gastric:Carcinoma	163.741	STAD
SW1710_URINARY_TRACT	ACH-000566	SW-1710	primary	urinary_tract	bladder	NS	NS	carcinoma	transitional_cell_carcinoma	NS	NS	female		84	caucasian		Caucasian			CCLE	DSMZ	Adherent epithelial monolayer	DMEM + 15% FBS	NA	10% DMSO		46.1	urinary_tract	urinary_tract	Bladder:Carcinoma	113.54	BLCA
MOLT13_HAEMATOPOIETIC_AND_LYMPHOID_TISSUE	ACH-000795	MOLT-13	primary	haematopoietic_and_lymphoid_tissue	NS	NS	NS	lymphoid_neoplasm	acute_lymphoblastic_T_cell_leukaemia	L2	NS	female		2			Caucasian			CCLE	DSMZ	Suspension; Extremely slow grower	RPMI-1640 +20% FBS	NA	5% DMSO		305.5	T-cell_ALL	T-cell_ALL	Leukemia:ALL	169.785	ALL
SR786_HAEMATOPOIETIC_AND_LYMPHOID_TISSUE	ACH-000338	SR-786	metastasis	haematopoietic_and_lymphoid_tissue	NS	NS	NS	lymphoid_neoplasm	anaplastic_large_cell_lymphoma	NS	NS	male		11			Caucasian	pleura	anaplastic_large_cell_lymphoma	CCLE	DSMZ	ovoid- to round, sometimes irregular, occasinally with apical processes, growing in suspention, singly or in small clumps	85% RPMI 1640 +15% h.i. FBS	NA		~ 30 hrs	NA	lymphoma_other	T-cell_lymphoma_other	Lymphoma:NH_T_cell	103.681	NA
SCC15_UPPER_AERODIGESTIVE_TRACT	ACH-000254	SCC-15	primary	upper_aerodigestive_tract	mouth	tongue	NS	carcinoma	squamous_cell_carcinoma	NS	NS	male		55			Caucasian			CCLE	NIBRI						NA	upper_aerodigestive	upper_aerodigestive	Upper_Aerodigestive_Tract:Carcinoma	98.6572	HNSC
RS5_FIBROBLAST	ACH-000531	RS-5	metastasis	pleura	NS	NS	NS	mesothelioma	NS	NS	NS	male		78			Caucasian	pleura		CCLE	DSMZ	adherent, sarcomatoid-like cells growing in monolayers	90% NCTC-109 + 10% h.i. FBS	2mM L-glutamine	5% DMSO	4 days	NA	mesothelioma	fibroblast_like	NA	125.653	NA
NCIH2126_LUNG	ACH-000785	NCI-H2126	metastasis	lung	NS	NS	NS	carcinoma	adenocarcinoma	NS	NS	male		65	caucasian		Caucasian	pleura	lung_cancer	CCLE	ATCC	adherent epithelial	DMEM:HAM's F12 1:1 +5% FBS	0.005 mg/ml Insulin, 0.01 mg/ml transferrin, 30 nM sodium selenite, 10 nM hydrocortisone, 10 nM beta estradiol, 10 mM HEPES, 1 mM L-glutamine	5%DMSO		423.2	lung_NSC	lung_NSC	Lung:NSCLC_Adeno	177.936	LUAD
NCIH2141_LUNG	ACH-001138	NCI-H2141	metastasis	lung	NS	NS	NS	carcinoma	small_cell_carcinoma	NS	NS	male		58	caucasian		Caucasian	lymph_node		CCLE	ATCC	suspension; lots of debris	DMEM:HAM's F12 1:1 + 5% FBS	.005 mg/ml insulin, .01 mg/ml transferrin, 30nM sodium selenite, 10 nM hydrocortisone, 2 mM L-glutamine	5%DMSO		136	lung_small_cell	lung_small_cell	NA	NA	SCLC
NCIH1385_LUNG	ACH-000737	NCI-H1385	metastasis	lung	NS	NS	NS	carcinoma	squamous_cell_carcinoma	NS	NS			NA			African_american	lymph_node		CCLE							NA	lung_NSC	lung_NSC	Lung:NSCLC_Squamous	154.628	LUSC
HCC827_LUNG	ACH-000012	HCC827	primary	lung	NS	NS	NS	carcinoma	adenocarcinoma	NS	NS	female		39	caucasian		Caucasian		lung_cancer	CCLE	ATCC	Adherent	RPMI-1640 10% FBS	NA	5%DMSO		117.6	lung_NSC	lung_NSC	Lung:NSCLC_Adeno	82.9265	LUAD
RD_SOFT_TISSUE	ACH-000169	RD	primary	soft_tissue	striated_muscle	NS	NS	rhabdomyosarcoma	embryonal	NS	NS	female		7	caucasian		Caucasian			CCLE	ATCC	Adherent Spindle cells and large multinucleated cells	DMEM +10%FBS		5%DMSO		49.4	soft_tissue	soft_tissue	Soft_Tissue:Sarcoma_Rhabdoid	90.0114	SARC
TT_THYROID	ACH-001321	TT	primary	thyroid	NS	NS	NS	carcinoma	medullary_carcinoma	NS	NS	female		77	caucasian		Caucasian		medulla_carcinoma	CCLE	NIBRI						NA	thyroid	thyroid	Oesophagus:Carcinoma	85.5867	THCA
TF1_HAEMATOPOIETIC_AND_LYMPHOID_TISSUE	ACH-000387	TF-1	primary	haematopoietic_and_lymphoid_tissue	NS	NS	NS	haematopoietic_neoplasm	acute_myeloid_leukaemia	M6	NS	male		35	asian	japan	Asian			CCLE	NIBRI						46.6	AML	AML	Leukemia:AML	141.266	LAML
HS172T_FIBROBLAST	ACH-000088	Hs 172.T	primary	urinary_tract	bladder	NS	NS	carcinoma	NS	NS	NS	male		50	caucasian		Caucasian			CCLE	ATCC	Adherent	DMEM +10 %FBS	NA	5% DMSO		NA	urinary_tract	fibroblast_like	NA	80.8983	NA
HS834T_FIBROBLAST	ACH-000275	Hs 834.T	metastasis	skin	NS	NS	NS	malignant_melanoma	NS	NS	NS			NA			Caucasian	lymph_node		CCLE		large adherent cells	DEMEM+10%fbs	NA	5%DMSO		NA	melanoma	fibroblast_like	NA	86.9393	NA
TE125T_FIBROBLAST	ACH-000079	TE 125.T	primary	soft_tissue	striated_muscle	NS	NS	rhabdomyosarcoma	NS	NS	NS	female		1	caucasian		Caucasian			CCLE	ATCC	Fibroblast Adherent	EMEM+10%FBS	NA	5%DMSo		265	soft_tissue	fibroblast_like	Soft_Tissue:Sarcoma_Rhabdoid	53.5555	SARC
8305C_THYROID	ACH-001306	8305C	primary	thyroid	NS	NS	NS	carcinoma	anaplastic_carcinoma	NS	NS	female		67			Asian			CCLE	DSMZ	Adherent large spindle-shaped cells growing in monolayer	RPMI1640+20%FBS	NA	10%DMSO	54hrs	121.6	thyroid	thyroid	Thyroid:Carcinoma	200.908	THCA
UACC812_BREAST	ACH-000568	UACC-812	primary	breast	NS	NS	NS	carcinoma	ductal_carcinoma	NS	NS	female		43			Caucasian		invasive_ductal_carcinoma	CCLE	ATCC	mostly adherent epithelial, some clusters in suspension	RPMI-1640 + 20% FBS	NA	5%DMSO		219.2	breast	breast	Breast:Carcinoma	117.551	BRCA
ALLSIL_HAEMATOPOIETIC_AND_LYMPHOID_TISSUE	ACH-000105	ALL-SIL	primary	haematopoietic_and_lymphoid_tissue	NS	NS	NS	lymphoid_neoplasm	acute_lymphoblastic_T_cell_leukaemia	NS	NS	male		17			Caucasian		TALL	CCLE	DSMZ	Mostly round cellsgrowing singly or in small clusters in suspention	80-90% RPHI 1640+10-20% h.i.FBS	NA	10%DMSO	~ 48 hrs	74	T-cell_ALL	T-cell_ALL	Leukemia:ALL	122.9	ALL
KASUMI2_HAEMATOPOIETIC_AND_LYMPHOID_TISSUE	ACH-000728	KASUMI-2	primary	haematopoietic_and_lymphoid_tissue	NS	NS	NS	lymphoid_neoplasm	acute_lymphoblastic_B_cell_leukaemia	L2	NS	male		15			Asian		acute lymphoblastic leukemia	CCLE	DSMZ	small round cells growing singly or in small clumps in suspension; some loosely adherent	RPMI-1640+10% FBS	NA	5%DMSO	30 hrs	48.5	leukemia_other	leukemia_other	Leukemia:ALL	243.995	ALL
DND41_HAEMATOPOIETIC_AND_LYMPHOID_TISSUE	ACH-000981	DND-41	primary	haematopoietic_and_lymphoid_tissue	NS	NS	NS	lymphoid_neoplasm	acute_lymphoblastic_T_cell_leukaemia	NS	NS	male		13			Caucasian		TALL	CCLE	DSMZ	round cells growing singl or, occasionally, in clumps	90%RPMI 1640+ 10% h.i. FBS	N/A		~ 35 hrs	139.1	T-cell_ALL	T-cell_ALL	Leukemia:ALL	723.543	ALL
ME1_HAEMATOPOIETIC_AND_LYMPHOID_TISSUE	ACH-000439	ME-1	primary	haematopoietic_and_lymphoid_tissue	NS	NS	NS	haematopoietic_neoplasm	acute_myeloid_leukaemia	M4	NS	male		40	asian	japan	Asian			CCLE	DSMZ	SINGLE IN SUSPENSION	RPMI-1640+10% FBS	NA	5% DMSO		142.8	AML	AML	Leukemia:AML	166.156	LAML
DM3_FIBROBLAST	ACH-000742	DM-3	metastasis	pleura	NS	NS	NS	mesothelioma	NS	NS	NS	male		62			Caucasian	pleura		CCLE	DSMZ	LARGE, ADHERENT CELLS; very slow grower			5%DMSO		NA	mesothelioma	fibroblast_like	NA	117.697	NA
JEKO1_HAEMATOPOIETIC_AND_LYMPHOID_TISSUE	ACH-000357	JeKo-1	primary	haematopoietic_and_lymphoid_tissue	NS	NS	NS	lymphoid_neoplasm	mantle_cell_lymphoma	NS	NS	female		78			Asian		mantle_cell_lymphoma	CCLE		suspension	RPMI1640+20%FBS	NA	10%DMSO		46	lymphoma_other	B-cell_lymphoma_other	Lymphoma:NH_B_cell	159.114	DLBC
JJN3_HAEMATOPOIETIC_AND_LYMPHOID_TISSUE	ACH-000653	JJN-3	primary	haematopoietic_and_lymphoid_tissue	NS	NS	NS	lymphoid_neoplasm	plasma_cell_myeloma	NS	NS	female		57			Caucasian		multiple_myeloma	CCLE	DSMZ	single round to oval cells showing a morphological range from mononuclear to occasionally multinucleated cells growing in suspention	40% Dulbecco's MEM +40% Iscove's MDM + 20% h.i. FBS	NA		~ 20-35 hrs	NA	multiple_myeloma	multiple_myeloma	Lymphoma:Multiple_Myeloma	152.314	MM
NUDHL1_HAEMATOPOIETIC_AND_LYMPHOID_TISSUE	ACH-000388	NU-DHL-1	metastasis	haematopoietic_and_lymphoid_tissue	NS	NS	NS	lymphoid_neoplasm	diffuse_large_B_cell_lymphoma	NS	NS	male		73	caucasian		Caucasian	lymph_node		CCLE	DSMZ	single, round to polymorph in suspention	80-90% RPMI 1640+ 10-20% h. i. FBS	NA		~ 50 hrs	NA	lymphoma_DLBCL	lymphoma_DLBCL	Lymphoma:NH_B_cell	124.397	DLBC
CL14_LARGE_INTESTINE	ACH-000342	CL-14	primary	large_intestine	colon	sigmoid	NS	carcinoma	NS	NS	NS	male		NA			Caucasian			CCLE	DSMZ	strongly adherent epitheloid cells growing in monolayers and forming islets	DMEM:HAM's F12 1:1 +20% FBS	N/A	10%DMSO	~ 170 hrs	NA	colorectal	colorectal	Colorectal:Carcinoma	104.966	COAD/READ
KYO1_HAEMATOPOIETIC_AND_LYMPHOID_TISSUE	ACH-000604	KYO-1	primary	haematopoietic_and_lymphoid_tissue	NS	NS	NS	haematopoietic_neoplasm	blast_phase_chronic_myeloid_leukaemia	NS	NS	male		22	asian	japan	Asian			CCLE	DSMZ	Round Cells or clumps in suspension	RPMI+20%FBS		10%DMSO		65.8	CML	CML	Leukemia:CML	187.938	LCML
JL1_PLEURA	ACH-000645	JL-1	primary	pleura	NS	NS	NS	mesothelioma	NS	NS	NS	male		54			Caucasian	pleura		CCLE	DSMZ				5%DMSO		63.1	mesothelioma	mesothelioma	Lung:Mesothelioma	150.706	MESO
CAL148_BREAST	ACH-000902	CAL-148	metastasis	breast	NS	NS	NS	carcinoma	ductal_carcinoma	NS	NS	female		58		france	Caucasian	pleura	breast_cancer	CCLE	DSMZ	Epitheloid cells as single cells or as clumps in suspension and monolayer	DMEM+20%FBS	NA		30-40hrs	60	breast	breast	Breast:Carcinoma	280.809	BRCA
NALM19_HAEMATOPOIETIC_AND_LYMPHOID_TISSUE	ACH-000130	NALM-19	primary	haematopoietic_and_lymphoid_tissue	NS	NS	NS	lymphoid_neoplasm	acute_lymphoblastic_B_cell_leukaemia	NS	NS	male		26			Asian			CCLE	DSMZ	small single round cells growing in suspension; small clumps	RPMI-1640+20% FBS	NA	5% DMSO	50-70 hrs	NA	B-cell_ALL	B-cell_ALL	Leukemia:ALL	117.229	ALL
HPBALL_HAEMATOPOIETIC_AND_LYMPHOID_TISSUE	ACH-000942	HPB-ALL	primary	haematopoietic_and_lymphoid_tissue	NS	NS	NS	lymphoid_neoplasm	acute_lymphoblastic_T_cell_leukaemia	NS	NS	male		14	asian	japan	Asian		TALL	CCLE	DSMZ	rond or polymorph cells growing singly or in clusters in suspentipn	80-90% RPMI 1640 +10-20% h.i. FBS	NA		~ 50 hrs	NA	T-cell_ALL	T-cell_ALL	Leukemia:ALL	498.983	ALL
SUPT11_HAEMATOPOIETIC_AND_LYMPHOID_TISSUE	ACH-000122	SUP-T11	primary	haematopoietic_and_lymphoid_tissue	NS	NS	NS	lymphoid_neoplasm	peripheral_T_cell_lymphoma_unspecified	NS	NS	male		74			Caucasian			CCLE	DSMZ	suspension	RPMI + 10 % FBS	NA	5% DMSO		78.9	lymphoma_other	T-cell_lymphoma_other	Lymphoma:NH_T_cell	76.6873	NA
CL40_LARGE_INTESTINE	ACH-000798	CL-40	primary	large_intestine	colon	right	NS	carcinoma	NS	NS	NS	female		NA			Caucasian			CCLE	DSMZ	adherent ephithelial-like cells growing as monolayers and in aggregates	80% mixture of Dulbecco's MEM + Ham's F 12 at 1:1 + 20% h.i. FBS	N/A		~ 3-4 days	NA	colorectal	colorectal	Colorectal:Carcinoma	180.311	COAD/READ
MDAMB134VI_BREAST	ACH-000044	MDA-MB-134-VI	metastasis	breast	NS	NS	NS	carcinoma	ductal_carcinoma	NS	NS	female		47	caucasian		Caucasian	pleura	invasive_ductal_carcinoma	CCLE		Mixed line	L15+20%FBS	NA	5%DMSO		368	breast	breast	Breast:Carcinoma	56.6911	BRCA
HCC1500_BREAST	ACH-000349	HCC1500	primary	breast	NS	NS	NS	carcinoma	ductal_carcinoma	NS	NS	female		32	african_american		African_american		ductal_carcinoma	CCLE	ATCC	Epithelial adherent	RPMI-1640+10% FBS	NA	5%DMSO		123.5	breast	breast	Breast:Carcinoma	89.2691	BRCA
HCC1599_BREAST	ACH-000196	HCC1599	primary	breast	NS	NS	NS	carcinoma	ductal_carcinoma	NS	NS	female		44	caucasian		Caucasian			CCLE	ATCC	suspension, multicell aggregates	RPMI-1640+10% FBS	NA	5%DMSO		179.8	breast	breast	Breast:Carcinoma	78.5868	BRCA
SUPHD1_HAEMATOPOIETIC_AND_LYMPHOID_TISSUE	ACH-001203	SUP-HD1	primary	haematopoietic_and_lymphoid_tissue	lymph_node	NS	NS	lymphoid_neoplasm	Hodgkin_lymphoma	NS	NS	male		37			Caucasian			CCLE	DSMZ	Supsension	McCOY'S 5A+20% FBS	NA	5% DMSO		NA	lymphoma_Hodgkin	lymphoma_Hodgkin	NA	NA	NA
MOTN1_HAEMATOPOIETIC_AND_LYMPHOID_TISSUE	ACH-001130	MOTN-1	primary	haematopoietic_and_lymphoid_tissue	lymph_node	NS	NS	lymphoid_neoplasm	T_cell_large_granular_lymphocytic_leukaemia	NS	NS	female		65			Asian			CCLE	DSMZ	SINGLE OR CLUSTERED OVOID TO ROUND; SOMETIMES IRREGULAR SHPAED CELLS GROWING IN SUSPENSION	RPMI-1640+20% FBS	NA	5%DMSO		NA	lymphoma_other	T-cell_lymphoma_other	Leukemia:ALL	NA	ALL
OCIAML3_HAEMATOPOIETIC_AND_LYMPHOID_TISSUE	ACH-000336	OCI-AML3	primary	haematopoietic_and_lymphoid_tissue	NS	NS	NS	haematopoietic_neoplasm	acute_myeloid_leukaemia	M4	NS	male		57			Caucasian			CCLE	DSMZ	single, mostly round cells growing in suspention	80% alpha-MEM + 20% h. i. FBS	NA		~ 35-40 hrs	70.4	AML	AML	Leukemia:AML	96.1995	LAML
SUDHL10_HAEMATOPOIETIC_AND_LYMPHOID_TISSUE	ACH-000271	SU-DHL-10	metastasis	haematopoietic_and_lymphoid_tissue	NS	NS	NS	lymphoid_neoplasm	diffuse_large_B_cell_lymphoma	NS	NS	male		25			Caucasian	pleura	diffuse_histiocytic_lymphoma	CCLE	DSMZ	round lymphoid cells growing singly or in clumps in suspention	80-90% RPMI 1640 +10-20% h.i. FBS	NA		~ 30-50 hrs	NA	lymphoma_DLBCL	lymphoma_DLBCL	Lymphoma:NH_B_cell	92.2557	DLBC
SUDHL4_HAEMATOPOIETIC_AND_LYMPHOID_TISSUE	ACH-000365	SU-DHL-4	metastasis	haematopoietic_and_lymphoid_tissue	NS	NS	NS	lymphoid_neoplasm	diffuse_large_B_cell_lymphoma	NS	NS	male		38			Caucasian	pleura	diffuse_histiocytic_lymphoma	CCLE	DSMZ	SUSPENSION	RPMI-1640+ 20% FBS	NA	5% DMSO		45.1	lymphoma_DLBCL	lymphoma_DLBCL	Lymphoma:NH_B_cell	96.7979	DLBC
RH41_SOFT_TISSUE	ACH-000100	RH-41	metastasis	soft_tissue	striated_muscle	NS	NS	rhabdomyosarcoma	alveolar	NS	NS	female		NA			Caucasian	liver		CCLE	DSMZ	adherent, epithelial-like cells growing as monolayers	90% RPMI 1640 +10% h,i, FBS	NA		~ 2-3 days	NA	soft_tissue	soft_tissue	Soft_Tissue:Sarcoma_Rhabdoid	85.5424	SARC
OCILY19_HAEMATOPOIETIC_AND_LYMPHOID_TISSUE	ACH-000124	OCI-LY-19	primary	haematopoietic_and_lymphoid_tissue	NS	NS	NS	lymphoid_neoplasm	diffuse_large_B_cell_lymphoma	NS	NS	female		27			Caucasian		germinal center B-cell-like (GCB) DLBCL	CCLE	DSMZ	SUSPENSION	alphaMEM+20%FBS	NA	5% DMSO		51.1	lymphoma_DLBCL	lymphoma_DLBCL	Lymphoma:NH_B_cell	82.4267	DLBC
MOLM6_HAEMATOPOIETIC_AND_LYMPHOID_TISSUE	ACH-000321	MOLM-6	primary	haematopoietic_and_lymphoid_tissue	NS	NS	NS	haematopoietic_neoplasm	blast_phase_chronic_myeloid_leukaemia	NS	NS	male		44			Asian			CCLE	DSMZ	SUSPENSION	RPMI-1640 +20%FBS	NA	5% DMSO		78.8	CML	CML	Leukemia:CML	175.683	LCML
SKMM2_HAEMATOPOIETIC_AND_LYMPHOID_TISSUE	ACH-000363	SK-MM-2	primary	haematopoietic_and_lymphoid_tissue	NS	NS	NS	lymphoid_neoplasm	plasma_cell_myeloma	NS	NS	male		54			Caucasian			CCLE	DSMZ	round single cells growing in suspention	80% RPMI 1640 +20% h.i. FBS	NA		~ 100 hrs	NA	multiple_myeloma	multiple_myeloma	Lymphoma:Multiple_Myeloma	97.9815	MM
KASUMI6_HAEMATOPOIETIC_AND_LYMPHOID_TISSUE	ACH-000166	Kasumi-6	primary	haematopoietic_and_lymphoid_tissue	NS	NS	NS	haematopoietic_neoplasm	acute_myeloid_leukaemia	M2	NS	male		64	asian		Asian			CCLE	ATCC	suspension;dt=55hrs	RPMI-1640+20%FBS	2ng/ml human GM-CSF	5%DMSO		142.9	AML	AML	Leukemia:AML	131.647	LAML
HS698T_FIBROBLAST	ACH-000850	Hs 698.T	metastasis	large_intestine	colon	NS	NS	carcinoma	adenocarcinoma	NS	NS	male		70	american_indian		Caucasian	connective_tissue_trunk		CCLE	ATCC	Adherent	DMEM +10 %FBS	NA	5%DMSO		NA	colorectal	fibroblast_like	Colorectal:Carcinoma	166.757	COAD/READ
UACC893_BREAST	ACH-000554	UACC-893	primary	breast	NS	NS	NS	carcinoma	ductal_carcinoma	NS	NS	female		57	caucasian		Caucasian		breast_cancer	CCLE	ATCC	Adherent Epithelial	L15+10%FBS	NA	5%DMSO		NA	breast	breast	Breast:Carcinoma	114.829	BRCA
MINO_HAEMATOPOIETIC_AND_LYMPHOID_TISSUE	ACH-000220	Mino	primary	haematopoietic_and_lymphoid_tissue	NS	NS	NS	lymphoid_neoplasm	mantle_cell_lymphoma	NS	NS	male		64	caucasian		Caucasian		mantle_cell_lymphoma	CCLE	GNF					~ 72 hrs	NA	lymphoma_other	B-cell_lymphoma_other	Lymphoma:NH_B_cell	107.698	DLBC
CHP126_AUTONOMIC_GANGLIA	ACH-000136	CHP-126	primary	autonomic_ganglia	NS	NS	NS	neuroblastoma	NS	NS	NS	female		1.16667			Caucasian		neuroblastoma	CCLE	DSMZ	spheroidal cells growing as clumps in suspension; grows as semi-adherent monolayer on surfaces coated with poly-L-lysine	80% RPMI 1640 +20% h.i.FBS	N/A	10%DMSO	~ 100 hrs	NA	neuroblastoma	neuroblastoma	PNET:Neuroblastoma	80.1104	NB
COLO680N_OESOPHAGUS	ACH-000717	COLO-680N	primary	oesophagus	NS	NS	NS	carcinoma	squamous_cell_carcinoma	NS	NS	female		57	african_american		African_american			CCLE	DSMZ	Adherent, epitheloid cells growing in monolayers	90% RPMI 1640 + 10% h.i.FBS	N/A		~ 60-70 hrs	NA	esophagus	esophagus	Oesophagus:Carcinoma	150.913	ESCA
COLO678_LARGE_INTESTINE	ACH-000350	COLO-678	metastasis	large_intestine	colon	NS	NS	carcinoma	adenocarcinoma	NS	NS	male		69			Caucasian	lymph_node		CCLE	DSMZ	round or spindle - shaped adherent cells growing as monolayer	90% RPMI 1640 + 10% h.i. FBS	N/A		~ 60-70 hrs	NA	colorectal	colorectal	Colorectal:Carcinoma	104.599	COAD/READ
LAMA84_HAEMATOPOIETIC_AND_LYMPHOID_TISSUE	ACH-000301	LAMA-84	primary	haematopoietic_and_lymphoid_tissue	NS	NS	NS	haematopoietic_neoplasm	blast_phase_chronic_myeloid_leukaemia	NS	NS	female		29			Caucasian			CCLE	DSMZ	single, round to polymorph cellsgrowing in suspention, some cells areloosely adherent	90% RPMI 1640 +10% h. i. FBS	NA		~ 50 hrs	NA	CML	CML	Leukemia:CML	107.939	LCML
CMLT1_HAEMATOPOIETIC_AND_LYMPHOID_TISSUE	ACH-000920	CML-T1	primary	haematopoietic_and_lymphoid_tissue	NS	NS	NS	haematopoietic_neoplasm	blast_phase_chronic_myeloid_leukaemia	NS	NS	female		36			Asian			CCLE	DSMZ	single, round cells insuspension	90 % Iscove's MDMD or RPMI 1640 + 10% h.i. FBS	N/A		~ 48-60 hrs	NA	CML	CML	Leukemia:CML	383.538	LCML
EHEB_HAEMATOPOIETIC_AND_LYMPHOID_TISSUE	ACH-000038	EHEB	primary	haematopoietic_and_lymphoid_tissue	NS	NS	NS	lymphoid_neoplasm	chronic_lymphocytic_leukaemia-small_lymphocytic_lymphoma	NS	NS	female		69			Caucasian			CCLE	DSMZ	lymphoblastoid, round to polygonal, single or clustered cells in suspention	90% RPMI 1640 +10% h.i.FBS	N/A		~ 50-70 hrs	176	lymphoma_other	B-cell_lymphoma_other	Leukemia:CLL	59.0287	CLL
CAL54_KIDNEY	ACH-000457	CAL-54	metastasis	kidney	NS	NS	NS	carcinoma	renal_cell_carcinoma	NS	NS	male		75			Caucasian	pleura		CCLE	DSMZ	epitheloid, adherent cells growing in monolayers	85% Dulbecco's MEM +15% h.i.FBS	4 mM L-glutamine, 1 mM sodium puruvate, 0.4 ug/ml hydrocortisone, 10 ng/ml EGF	10%DMSO	~ 72 hrs	NA	kidney	kidney	Kidney:Carcinoma	106.551	KIRC
BV173_HAEMATOPOIETIC_AND_LYMPHOID_TISSUE	ACH-000432	BV-173	primary	haematopoietic_and_lymphoid_tissue	NS	NS	NS	haematopoietic_neoplasm	blast_phase_chronic_myeloid_leukaemia	NS	NS	male		45			Caucasian			CCLE	DSMZ	SUSPENSION ( small round cells, slow to grow)	RPMI-1640+20% FBS	2mM L-Glutamine	10% DMSO		100.6	CML	CML	Leukemia:CML	119.074	LCML
DOHH2_HAEMATOPOIETIC_AND_LYMPHOID_TISSUE	ACH-000056	DOHH-2	metastasis	haematopoietic_and_lymphoid_tissue	NS	NS	NS	lymphoid_neoplasm	diffuse_large_B_cell_lymphoma	NS	NS	male		60			Caucasian	pleura		CCLE	DSMZ	cells grow as sinngle cells or in clumps in suspention	90% RPMI + 10% h.i.FBS	N/a		~ 40 hrs	119.2	lymphoma_DLBCL	lymphoma_DLBCL	Lymphoma:NH_B_cell	86.3144	DLBC
EOL1_HAEMATOPOIETIC_AND_LYMPHOID_TISSUE	ACH-000198	EOL-1	primary	haematopoietic_and_lymphoid_tissue	NS	NS	NS	haematopoietic_neoplasm	acute_myeloid_leukaemia	M5	NS	male		33			Caucasian			CCLE	DSMZ	(relatively small) round cells growing in suspention, singly or in small clusters	90% RPMI 1640 +10% h.i. FBS	NA		~ 60 hrs	64.5	AML	AML	Leukemia:AML	93.7895	LAML
NALM6_HAEMATOPOIETIC_AND_LYMPHOID_TISSUE	ACH-000938	NALM-6	primary	haematopoietic_and_lymphoid_tissue	NS	NS	NS	lymphoid_neoplasm	acute_lymphoblastic_B_cell_leukaemia	NS	NS	male		19			Caucasian			CCLE	DSMZ	single, small, round cells in suspention	90% RPMI 1640 +10% h. i. FBS	NA		~ 36 hrs	NA	B-cell_ALL	B-cell_ALL	Leukemia:ALL	470.058	ALL
VMCUB1_URINARY_TRACT	ACH-000545	VM-CUB1	primary	urinary_tract	bladder	NS	NS	carcinoma	transitional_cell_carcinoma	NS	NS	male		NA			Caucasian			CCLE	DSMZ	Adherent	DMEM +10%FBS	NA	0.05		63.3	urinary_tract	urinary_tract	Bladder:Carcinoma	98.8426	BLCA
LP1_HAEMATOPOIETIC_AND_LYMPHOID_TISSUE	ACH-000204	LP-1	primary	haematopoietic_and_lymphoid_tissue	NS	NS	NS	lymphoid_neoplasm	plasma_cell_myeloma	NS	NS	female		56			Caucasian		multiple_myeloma	CCLE	HSRRB	Supsension	IMDM + 20% FBS	NA	5% DMSO		127.7	multiple_myeloma	multiple_myeloma	Lymphoma:Multiple_Myeloma	90.8147	MM
LXF289_LUNG	ACH-000787	LXF-289	primary	lung	NS	NS	NS	carcinoma	adenocarcinoma	NS	NS	male		63			Caucasian			CCLE	DSMZ	adherent epithelial-like growing as monolayer	Hams F10+10% FBS	NA	5%DMSO	50 hrs	63.2	lung_NSC	lung_NSC	Lung:NSCLC_Adeno	187.337	LUAD
MONOMAC1_HAEMATOPOIETIC_AND_LYMPHOID_TISSUE	ACH-001129	MONO-MAC-1	primary	haematopoietic_and_lymphoid_tissue	NS	NS	NS	haematopoietic_neoplasm	acute_myeloid_leukaemia	M5	NS	male		64			Caucasian			CCLE	DSMZ	single, round/multiformed cells in suspention	90% RPMI 1640 +10% h. i. FBS	2mM L- glutamine+1x non-essential amino acids+1mM sodium pyruvate		~ 30-50 hrs	77.9	AML	AML	Leukemia:AML	93.818	LAML
PL21_HAEMATOPOIETIC_AND_LYMPHOID_TISSUE	ACH-000218	PL-21	primary	haematopoietic_and_lymphoid_tissue	NS	NS	NS	haematopoietic_neoplasm	acute_myeloid_leukaemia	M3	NS	male		24			Asian			CCLE	DSMZ	single cells in suspention; cells have a rather monoblastic morphology without the typical APL granules	80% RPMI 1640 +20% h.i. FBs	NA		~ 50 hrs	72.8	AML	AML	Leukemia:AML	141.598	LAML
PF382_HAEMATOPOIETIC_AND_LYMPHOID_TISSUE	ACH-000937	PF-382	metastasis	haematopoietic_and_lymphoid_tissue	NS	NS	NS	lymphoid_neoplasm	acute_lymphoblastic_T_cell_leukaemia	NS	NS	female		6			Caucasian	pleura	TALL	CCLE	DSMZ	single, round to oval cells in suspention	90% RPMI 1640 +10% h.i. FBS	NA		~ 70 hrs	NA	T-cell_ALL	T-cell_ALL	Leukemia:ALL	514.433	ALL
NALM1_HAEMATOPOIETIC_AND_LYMPHOID_TISSUE	ACH-000462	NALM-1	primary	haematopoietic_and_lymphoid_tissue	NS	NS	NS	haematopoietic_neoplasm	blast_phase_chronic_myeloid_leukaemia	NS	NS	female		3			African_american			CCLE	DSMZ	small, single, round cells in suspention	80-90% RPMI 1640 +10-20% h. i. FBS	NA		~ 48 hrs	NA	CML	CML	Leukemia:CML	130.101	LCML
OCIAML2_HAEMATOPOIETIC_AND_LYMPHOID_TISSUE	ACH-000113	OCI-AML2	primary	haematopoietic_and_lymphoid_tissue	NS	NS	NS	haematopoietic_neoplasm	acute_myeloid_leukaemia	M4	NS	male		65			Caucasian			CCLE	DSMZ	single, round to oval cells in suspention	80-90% RPMI 1640 +10-20% h. i. FBS	NA		~ 30-50 hrs	NA	AML	AML	Leukemia:AML	102.964	LAML
MHHCALL3_HAEMATOPOIETIC_AND_LYMPHOID_TISSUE	ACH-000032	MHH-CALL-3	primary	haematopoietic_and_lymphoid_tissue	NS	NS	NS	lymphoid_neoplasm	acute_lymphoblastic_B_cell_leukaemia	NS	NS	female		11			Caucasian			CCLE	DSMZ	single,relatively small round cells growing in suspention	80% RPMI 1640 + 20% h. i. FBS	NA		~ 120 hrs	NA	B-cell_ALL	B-cell_ALL	Leukemia:ALL	76.8297	ALL
JURLMK1_HAEMATOPOIETIC_AND_LYMPHOID_TISSUE	ACH-000326	JURL-MK1	primary	haematopoietic_and_lymphoid_tissue	NS	NS	NS	haematopoietic_neoplasm	blast_phase_chronic_myeloid_leukaemia	NS	NS	male		73			Caucasian			CCLE	DSMZ	round cells growing singly or in small clusters in suspention	90% RPMI1640 +10%h.i. FBS	NA		~ 48 hrs	NA	CML	CML	Leukemia:CML	99.1192	LCML
OCIAML5_HAEMATOPOIETIC_AND_LYMPHOID_TISSUE	ACH-000065	OCI-AML5	primary	haematopoietic_and_lymphoid_tissue	NS	NS	NS	haematopoietic_neoplasm	acute_myeloid_leukaemia	M4	NS	male		77			Caucasian			CCLE	DSMZ	round cells growing singly or in clumps in suspention	70% alpha-MEM + 20% h. i. FBS	10% vol conditioned medium of cell line 5637 (DSM ACC 35) (or 10ng/ml GM-CSF		~ 30-50 hrs	NA	AML	AML	Leukemia:AML	86.4227	LAML
KE37_HAEMATOPOIETIC_AND_LYMPHOID_TISSUE	ACH-000101	KE-37	primary	haematopoietic_and_lymphoid_tissue	NS	NS	NS	lymphoid_neoplasm	acute_lymphoblastic_T_cell_leukaemia	NS	NS	male		27			Caucasian			CCLE	DSMZ					25 hrs	NA	leukemia_other	leukemia_other	Leukemia:ALL	90.4377	ALL
JK1_HAEMATOPOIETIC_AND_LYMPHOID_TISSUE	ACH-000241	JK-1	primary	haematopoietic_and_lymphoid_tissue	NS	NS	NS	haematopoietic_neoplasm	blast_phase_chronic_myeloid_leukaemia	NS	NS	male		62			Asian			CCLE	DSMZ	round single cells growing in suspention (cell pellet shows dedish color hemoglobin)	80% RPMI 1640 +20% h.i.FBS	NA		~ 50 hrs	NA	CML	CML	Leukemia:CML	122.762	LCML
RI1_HAEMATOPOIETIC_AND_LYMPHOID_TISSUE	ACH-000398	RI-1	primary	haematopoietic_and_lymphoid_tissue	NS	NS	NS	lymphoid_neoplasm	B_cell_lymphoma_unspecified	NS	NS	female		57			Caucasian		b_cell_non_hodgkin_lymphoma	CCLE	DSMZ	large round cells growing in suspention	90% RPMI 1640 +10% h.i. FBS	NA		~ 48-72 hrs	NA	lymphoma_other	B-cell_lymphoma_other	Lymphoma:NH_B_cell	124.764	DLBC
KARPAS422_HAEMATOPOIETIC_AND_LYMPHOID_TISSUE	ACH-000315	KARPAS-422	metastasis	haematopoietic_and_lymphoid_tissue	NS	NS	NS	lymphoid_neoplasm	diffuse_large_B_cell_lymphoma	NS	NS	female		73			Caucasian	pleura		CCLE	DSMZ	supension	RPMI-1640 + 20% FBS	NA	10%DMSO		58.5	lymphoma_DLBCL	lymphoma_DLBCL	Lymphoma:NH_B_cell	108.071	DLBC
L540_HAEMATOPOIETIC_AND_LYMPHOID_TISSUE	ACH-000806	L-540	metastasis	haematopoietic_and_lymphoid_tissue	NS	NS	NS	lymphoid_neoplasm	Hodgkin_lymphoma	NS	NS	female		20			Caucasian	bone_marrow		CCLE	DSMZ	round cells growing singly in suspention	80% RPMI 1640 + 20% h. i. FBS	NA		~ 70 hrs	NA	lymphoma_Hodgkin	lymphoma_Hodgkin	Lymphoma:Hodgkin	189.621	NA
CAL78_BONE	ACH-000516	CAL-78	primary	bone	NS	NS	NS	chondrosarcoma	dedifferentiated	NS	NS	male		76			Caucasian		chondrosarcoma	CCLE	DSMZ	Adherent fibroblast, extremely slow. A lot of debris present	RPMI+20%FBS	NA	10%DMSO	240hrs	117.7	chondrosarcoma	chondrosarcoma	Bone:Sarcoma_Chondro	104.753	SARC
HDQP1_BREAST	ACH-000643	HDQ-P1	primary	breast	NS	NS	NS	carcinoma	ductal_carcinoma	NS	NS	female		50	caucasian		Caucasian		breast_cancer	CCLE	DSMZ	adherent monolayers	DMEM+10% FBS	NA	5% DMSO	72hrs	63	breast	breast	Breast:Carcinoma	148.696	BRCA
MHHCALL4_HAEMATOPOIETIC_AND_LYMPHOID_TISSUE	ACH-000156	MHH-CALL-4	primary	haematopoietic_and_lymphoid_tissue	NS	NS	NS	lymphoid_neoplasm	acute_lymphoblastic_B_cell_leukaemia	NS	NS	male		10	caucasian		Caucasian			CCLE	DSMZ	single, round cells growing in suspention, partly in clusters	80% RPMI 1640 + 20% h. i. FBS	NA		~ 80-100 hrs	NA	B-cell_ALL	B-cell_ALL	Leukemia:ALL	82.3891	ALL
MUTZ5_HAEMATOPOIETIC_AND_LYMPHOID_TISSUE	ACH-000492	MUTZ-5	primary	haematopoietic_and_lymphoid_tissue	NS	NS	NS	lymphoid_neoplasm	acute_lymphoblastic_B_cell_leukaemia	NS	NS	male		26			Caucasian			CCLE	DSMZ	SUSPENSION	RPMI-1640 +20% FBS	NA	5% DMSO		279.2	B-cell_ALL	B-cell_ALL	Leukemia:ALL	130.123	ALL
ONCODG1_OVARY	ACH-000013	ONCO-DG-1	metastasis	ovary	NS	NS	NS	carcinoma	adenocarcinoma	NS	NS	female		60	caucasian		Caucasian	ascites	ovarian_cancer	CCLE	DSMZ				5%DMSO		54.7	ovary	ovary	Ovary:Carcinoma	76.7221	OV
HDLM2_HAEMATOPOIETIC_AND_LYMPHOID_TISSUE	ACH-000267	HDLM-2	metastasis	haematopoietic_and_lymphoid_tissue	NS	NS	NS	lymphoid_neoplasm	Hodgkin_lymphoma	NS	NS	male		74			Caucasian	pleura		CCLE	DSMZ	SUSPENSION	RPMI-1640+ 10% FBS	NA	5% DMSO		126.8	lymphoma_Hodgkin	lymphoma_Hodgkin	Lymphoma:Hodgkin	NA	NA
CAL29_URINARY_TRACT	ACH-000142	CAL-29	primary	urinary_tract	bladder	NS	NS	carcinoma	transitional_cell_carcinoma	NS	NS	female		80			Caucasian			CCLE	DSMZ	Adherent	DMEM +10 %FBS	NA	5% DMSO		82.5	urinary_tract	urinary_tract	Bladder:Carcinoma	66.738	BLCA
KOPN8_HAEMATOPOIETIC_AND_LYMPHOID_TISSUE	ACH-001106	KOPN-8	primary	haematopoietic_and_lymphoid_tissue	NS	NS	NS	lymphoid_neoplasm	acute_lymphoblastic_B_cell_leukaemia	NS	NS	female	pediatric	0.25			Asian			CCLE	DSMZ	single round rather small cells growing in suspention	90% RPMI 1640 +10% h. i. FBS	NA		~ 48 hrs	NA	B-cell_ALL	B-cell_ALL	Leukemia:ALL	233.782	ALL
SCLC21H_LUNG	ACH-000659	SCLC-21H	metastasis	lung	NS	NS	NS	carcinoma	small_cell_carcinoma	NS	NS	male		46	caucasian		Caucasian	pleura		CCLE	DSMZ	growing in suspention in mall or very big clusters(sheets)- cells are not adherent	90% Dulbecco's MEM (4.5g/L glucose) + 10% h.i. FBS	NA		~ 2 days	NA	lung_small_cell	lung_small_cell	Lung:SCLC	163.647	SCLC
CALU3_LUNG	ACH-000392	Calu-3	metastasis	lung	NS	NS	NS	carcinoma	adenocarcinoma	NS	NS	male		25	caucasian		Caucasian	pleura	lung_cancer	CCLE	NIBRI						NA	lung_NSC	lung_NSC	Lung:NSCLC_Adeno	107.558	LUAD
NCIH1435_LUNG	ACH-000852	NCI-H1435	primary	lung	NS	NS	NS	carcinoma	non_small_cell_carcinoma	NS	NS	female		35			Caucasian			CCLE	ATCC	Adherent, single cells loosely attached	RPMI 1640+10%FBS	NA	5%DMSO		81.4	lung_NSC	lung_NSC	Lung:NSCLC_Adeno	227.304	LUAD
NCIH2009_LUNG	ACH-000886	NCI-H2009	metastasis	lung	NS	NS	NS	carcinoma	adenocarcinoma	NS	NS	female		68	caucasian		Caucasian	lymph_node	lung_cancer	CCLE	ATCC		DMEM:HAM's F12 1:1 +5% FBS	0.005 mg/ml Insulin, 0.01 mg/ml transferrin, 30 nM sodium selenite, 10 nM hydrocortisone, 10 nM beta estradiol, 10 mM HEPES, 1 mM L-glutamine	5%DMSO		53.7	lung_NSC	lung_NSC	Lung:NSCLC_Adeno	295.745	LUAD
NCIH1869_LUNG	ACH-000894	NCI-H1869	metastasis	lung	NS	NS	NS	carcinoma	squamous_cell_carcinoma	NS	NS	male		58	caucasian		Caucasian	pleura		CCLE	ATCC	Adherent	RPMI 1640+10%FBS	NA	5%DMSO		207.3	lung_NSC	lung_NSC	Lung:NSCLC_Squamous	426	LUSC
HS852T_SKIN	ACH-000274	Hs 852.T	primary	skin	NS	NS	NS	malignant_melanoma	NS	NS	NS			NA			Asian			CCLE		ADHRENT EPITHELIAL	DMEM+10% FBS	NA	5%DMSO		74.3	melanoma	melanoma	Skin:Melanoma	127.663	SKCM
HCC1419_BREAST	ACH-000277	HCC1419	primary	breast	NS	NS	NS	carcinoma	ductal_carcinoma	NS	NS	female		42			Caucasian		breast_cancer	CCLE	GNF						NA	breast	breast	Breast:Carcinoma	95.6887	BRCA
BT483_BREAST	ACH-000818	BT-483	primary	breast	NS	NS	NS	carcinoma	ductal_carcinoma	medullary	NS	female		23	caucasian		Caucasian		breast_cancer	CCLE	ATCC	Adherent epithelial	RPMI-1640 + 20% FBS	0.01 mg/ml bovine insulin	5%DMSO		206.3	breast	breast	Breast:Carcinoma	178.19	BRCA
HS281T_FIBROBLAST	ACH-000083	Hs 281.T	primary	breast	NS	NS	NS	carcinoma	NS	NS	NS	female		37	caucasian		Caucasian			CCLE	GNF						NA	breast	fibroblast_like	NA	80.6581	NA
HS934T_FIBROBLAST	ACH-000194	Hs 934.T	primary	skin	NS	NS	NS	malignant_melanoma	NS	NS	NS	female		58	caucasian		Caucasian			CCLE	ATCC	Adherent	DMEM +10 %FBS	4.5g/L glucose +1.5 g/Lsodium bicarbonate	5%DMSO		149.9	melanoma	fibroblast_like	Skin:Melanoma	104.776	SKCM
HCC4006_LUNG	ACH-000066	HCC4006	metastasis	lung	NS	NS	NS	carcinoma	adenocarcinoma	NS	NS	male		NA	caucasian		Caucasian	pleura	lung_cancer	CCLE	ATCC	Adherent epithelial	RPMI-1640 + 10% FBS	NA	5%DMSO		108.7	lung_NSC	lung_NSC	Lung:NSCLC_Adeno	89.3092	LUAD
HCC1428_BREAST	ACH-000352	HCC1428	metastasis	breast	NS	NS	NS	carcinoma	NS	NS	NS	female		49	caucasian		Caucasian	pleura	breast_cancer	CCLE	ATCC	Adherent; large epithelial cells with occasional vacuole formation	RPMI-1640+10% FBS	NA	5%DMSO		81.4	breast	breast	Breast:Carcinoma	102.373	BRCA
KU812_HAEMATOPOIETIC_AND_LYMPHOID_TISSUE	ACH-000074	KU812	primary	haematopoietic_and_lymphoid_tissue	NS	NS	NS	haematopoietic_neoplasm	chronic_myeloid_leukaemia	Ph_positive	NS	male		38	asian		Asian			CCLE	GNF						NA	CML	CML	Leukemia:CML	91.9123	LCML
SHP77_LUNG	ACH-000790	SHP-77	primary	lung	left_upper_lobe	NS	NS	carcinoma	small_cell_carcinoma	NS	NS	male		54	caucasian		Caucasian			CCLE	ATCC	mixed	RPMI-1640 + 10% FBS	NA	5%DMSO		61.6	lung_small_cell	lung_small_cell	Lung:SCLC	171.458	SCLC
TE441T_SOFT_TISSUE	ACH-000772	TE 441.T	primary	soft_tissue	striated_muscle	NS	NS	rhabdomyosarcoma	NS	NS	NS	female		14	african_american		African_american			CCLE	ATCC	Mixed	DMEM+10%FBS	NA	5%DMSO		257.6	soft_tissue	soft_tissue	Soft_Tissue:Sarcoma_Rhabdoid	152.067	SARC
NB1_AUTONOMIC_GANGLIA	ACH-000804	NB-1	metastasis	autonomic_ganglia	NS	NS	NS	neuroblastoma	NS	NS	NS	male		2			Asian	lymph_node	neuroblastoma	CCLE		Adherent			5% DMSO		37.5	neuroblastoma	neuroblastoma	PNET:Neuroblastoma	209.274	NB
HS274T_FIBROBLAST	ACH-000134	Hs 274.T	primary	breast	NS	NS	NS	carcinoma	NS	NS	NS	female		66	caucasian		Caucasian			CCLE	ATCC	Supsension	DMEM + 10% FBS	NA	5% DMSO		NA	breast	fibroblast_like	NA	NA	NA
PFEIFFER_HAEMATOPOIETIC_AND_LYMPHOID_TISSUE	ACH-000140	Pfeiffer	metastasis	haematopoietic_and_lymphoid_tissue	NS	NS	NS	lymphoid_neoplasm	diffuse_large_B_cell_lymphoma	NS	NS	male		NA	caucasian		Caucasian	pleura		CCLE	ATCC	suspension, lymphoblast	RPMI-1640 + 10% FBS	NA	5%DMSO		34.1	lymphoma_DLBCL	lymphoma_DLBCL	Lymphoma:NH_B_cell	107.286	DLBC
ZR7530_BREAST	ACH-000828	ZR-75-30	metastasis	breast	NS	NS	NS	carcinoma	ductal_carcinoma	NS	NS	female		47	african_american		African_american	ascites	breast_cancer	CCLE	GNF					110 hrs	NA	breast	breast	Breast:Carcinoma	175.877	BRCA
HS863T_FIBROBLAST	ACH-000119	Hs 863.T	primary	bone	NS	NS	NS	Ewings_sarcoma-peripheral_primitive_neuroectodermal_tumour	NS	NS	NS	female		5	caucasian		Caucasian			CCLE	ATCC	Adherent	DMEM +10 %FBS	4.5g/L glucose +1.5 g/Lsodium bicarbonate	5%DMSO		175.9	Ewings_Sarcoma	fibroblast_like	Bone:Sarcoma_Ewing	93.1815	SARC
NCIH841_LUNG	ACH-000292	NCI-H841	metastasis	lung	NS	NS	NS	carcinoma	small_cell_carcinoma	NS	NS	male		51	caucasian		Caucasian	lymph_node		CCLE							40.5	lung_small_cell	lung_small_cell	Lung:SCLC	131.471	SCLC
HS821T_FIBROBLAST	ACH-000526	Hs 821.T	primary	bone	NS	NS	NS	giant_cell_tumour	NS	NS	NS	female		31	caucasian		Caucasian			CCLE	GNF						NA	giant_cell_tumour	fibroblast_like	NA	129.911	NA
NCIH1944_LUNG	ACH-000414	NCI-H1944	metastasis	lung	NS	NS	NS	carcinoma	non_small_cell_carcinoma	NS	NS	female		62	caucasian		Caucasian	soft_tissue		CCLE	ATCC	Adherent	RPMI+10%FBS	NA	5%DMSO		70.1	lung_NSC	lung_NSC	Lung:NSCLC_Adeno	111.63	LUAD
NCIH2405_LUNG	ACH-000121	NCI-H2405	metastasis	lung	NS	NS	NS	carcinoma	adenocarcinoma	NS	NS	male		47	caucasian		Caucasian	ascites		CCLE							NA	lung_NSC	lung_NSC	Lung:NSCLC_Adeno	99.0934	LUAD
DEL_HAEMATOPOIETIC_AND_LYMPHOID_TISSUE	ACH-000233	DEL	metastasis	haematopoietic_and_lymphoid_tissue	NS	NS	NS	lymphoid_neoplasm	NS	NS	NS	male		12			Caucasian	pleura		CCLE	DSMZ	Grows often in cluster in suspention, most cells are polygonal ( some cells are round)	90% RPMI 1640 +10% h.i.FBS	N/A		~ 30 hrs	81.1	lymphoma_other	T-cell_lymphoma_other	Lymphoma:NH_T_cell	105.773	NA
BEN_LUNG	ACH-000603	BEN	metastasis	lung	NS	NS	NS	carcinoma	NS	NS	NS	male		71			Caucasian	lymph_node		CCLE	DSMZ	Adherent, epitheloid cells growing in monolayers	90% Dulbecco'sMEM(4.5g/l glucose) +10% h.i.FBS	NA	10%DMSO	~ 40-50 hrs	58.8	lung_NSC	lung_NSC	Lung:Others	138.039	UNABLE TO CLASSIFY
COLO320_LARGE_INTESTINE	ACH-000202	COLO-320	primary	large_intestine	colon	sigmoid	NS	carcinoma	adenocarcinoma	NS	NS	female		55	caucasian		Caucasian			CCLE	DSMZ	undifferentiated, round cells in suspension and loosely adherent in monolayers	90% RPMI 1640 + 10% h.i. FBS	N/A		~ 38 hrs	NA	colorectal	colorectal	Colorectal:Carcinoma	86.8576	COAD/READ
RPMI8402_HAEMATOPOIETIC_AND_LYMPHOID_TISSUE	ACH-000636	RPMI-8402	primary	haematopoietic_and_lymphoid_tissue	NS	NS	NS	lymphoid_neoplasm	acute_lymphoblastic_T_cell_leukaemia	NS	NS	female		16			Caucasian		TALL	CCLE	DSMZ	SUSPENSION	RPMI-1640+ 10% FBS	NA	5% DMSO		51.7	T-cell_ALL	T-cell_ALL	Leukemia:ALL	146.573	ALL
SUDHL1_HAEMATOPOIETIC_AND_LYMPHOID_TISSUE	ACH-000664	SU-DHL-1	metastasis	haematopoietic_and_lymphoid_tissue	NS	NS	NS	lymphoid_neoplasm	anaplastic_large_cell_lymphoma	NS	NS	male		10			Caucasian	pleura	anaplastic_large_cell_lymphoma	CCLE	DSMZ	polymorphic cells growing in suspention, singly or in small clusters	90% RPMI 1640 +10% h.i. FBS	NA		~ 40-50 hrs	NA	lymphoma_other	T-cell_lymphoma_other	Lymphoma:NH_T_cell	125.342	NA
P12ICHIKAWA_HAEMATOPOIETIC_AND_LYMPHOID_TISSUE	ACH-000372	P12-ICHIKAWA	primary	haematopoietic_and_lymphoid_tissue	NS	NS	NS	lymphoid_neoplasm	acute_lymphoblastic_T_cell_leukaemia	NS	NS	male		7			Asian		TALL	CCLE	DSMZ	single, polymorph cells in suspention	90% RPMI 1640 +10% h.i. FBS	NA		~ 40-50 hrs	NA	T-cell_ALL	T-cell_ALL	Leukemia:ALL	145.978	ALL
BFTC905_URINARY_TRACT	ACH-000802	BFTC-905	primary	urinary_tract	bladder	NS	NS	carcinoma	transitional_cell_carcinoma	papillary_transitional_cell_carcinoma	NS	female		51	asian	chinese	Asian			CCLE	DSMZ	Adherent	DMEM + 10%FBS	NA	5%DMSO		38.3	urinary_tract	urinary_tract	Bladder:Carcinoma	177.993	BLCA
BFTC909_KIDNEY	ACH-000792	BFTC-909	primary	kidney	NS	NS	NS	carcinoma	NS	NS	NS	male		64	asian	taiwan	Asian			CCLE	DSMZ	epithelial-like (spindle) cells growing in monolayers; cells contain considerable amounts of small, dark granules	DMEM + 10% FBS	NA	10%DMSO	~ 50hrs	40	kidney	kidney	Kidney:Carcinoma	167.948	KIRC
MHHES1_BONE	ACH-000391	MHH-ES-1	metastasis	bone	pelvis	NS	NS	Ewings_sarcoma-peripheral_primitive_neuroectodermal_tumour	NS	NS	NS	male		12	turkish		Caucasian	ascites		CCLE	DSMZ	adherent cells of various size, single or in small clusters, growing as monolayer	90% RPMI 1640 +10% h. i. FBS	NA		~ 28 hrs	NA	Ewings_Sarcoma	Ewings_sarcoma	Bone:Sarcoma_Ewing	101.084	SARC
JVM3_HAEMATOPOIETIC_AND_LYMPHOID_TISSUE	ACH-000346	JVM-3	primary	haematopoietic_and_lymphoid_tissue	lymph_node	NS	NS	lymphoid_neoplasm	chronic_lymphocytic_leukaemia-small_lymphocytic_lymphoma	NS	NS	male		73			Caucasian			CCLE	DSMZ	lymphoblastoid cells growing in clumps in suspention	90% RPMI 1640 + 10% h. i. FBS	NA		~ 30 hrs	NA	lymphoma_other	B-cell_lymphoma_other	Leukemia:CLL	108.036	CLL
NOMO1_HAEMATOPOIETIC_AND_LYMPHOID_TISSUE	ACH-000168	NOMO-1	primary	haematopoietic_and_lymphoid_tissue	NS	NS	NS	haematopoietic_neoplasm	acute_myeloid_leukaemia	M5	NS	female		31			Asian			CCLE	HSRRB						66.5	AML	AML	Leukemia:AML	120.115	LAML
NCIH727_LUNG	ACH-000775	NCI-H727	primary	lung	bronchus	NS	NS	carcinoid-endocrine_tumour	NS	NS	NS	female		65	caucasian		Caucasian			CCLE	ATCC	adherent	RPMI 1640 +10% FBS	NA	5%DMSO		65.6	other	other	Endocrine	165.177	NA
HS343T_FIBROBLAST	ACH-000184	Hs 343.T	primary	breast	NS	NS	NS	carcinoma	NS	NS	NS	female		47	caucasian		Caucasian			CCLE	GNF						NA	breast	fibroblast_like	NA	84.8086	NA
HCC2935_LUNG	ACH-000150	HCC2935	primary	lung	NS	NS	NS	carcinoma	non_small_cell_carcinoma	NS	NS	male		39	caucasian		Caucasian		lung_cancer	CCLE	ATCC	Adherent epithelial	RPMI-1640 + 10% FBS	NA	5%DMSO		115.9	lung_NSC	lung_NSC	Lung:NSCLC_Others	84.686	NA
HS888T_FIBROBLAST	ACH-000154	Hs 888.T	metastasis	bone	NS	NS	NS	osteosarcoma	NS	NS	NS	male		20	caucasian		Caucasian	lung		CCLE	GNF						NA	osteosarcoma	fibroblast_like	NA	109.901	NA
MKN45_STOMACH	ACH-000356	MKN-45	metastasis	stomach	NS	NS	NS	carcinoma	diffuse_adenocarcinoma	NS	NS	female		62	asian	japan	Asian	liver		CCLE	HSRRB						NA	stomach	stomach	Gastric:Carcinoma	130.548	STAD
8505C_THYROID	ACH-001307	8505C	primary	thyroid	NS	NS	NS	carcinoma	anaplastic_carcinoma	NS	NS	female		78			Asian			CCLE	HSRRB	fibroblast-like	Eagle's minimal essential medium with 10% fetal calf serum	NA		NA	NA	thyroid	thyroid	Thyroid:Carcinoma	141.209	THCA
KU1919_URINARY_TRACT	ACH-000486	KU-19-19	primary	urinary_tract	bladder	NS	NS	carcinoma	transitional_cell_carcinoma	NS	NS	male		76			Asian			CCLE	DSMZ	Adherent	RPMI +10%FBS	NA	5%DMSO		35.1	urinary_tract	urinary_tract	Bladder:Carcinoma	164.743	BLCA
KCL22_HAEMATOPOIETIC_AND_LYMPHOID_TISSUE	ACH-000983	KCL-22	metastasis	haematopoietic_and_lymphoid_tissue	NS	NS	NS	haematopoietic_neoplasm	blast_phase_chronic_myeloid_leukaemia	NS	NS	female		32			Asian	pleura		CCLE	DSMZ	round, single cells in suspention, sometimes in small clusters	90% RPMI 1640 + 10% h. i. FBS	NA		~ 24 hrs	NA	CML	CML	Leukemia:CML	857.84	LCML
CADOES1_BONE	ACH-000210	CADO-ES1	metastasis	bone	NS	NS	NS	Ewings_sarcoma-peripheral_primitive_neuroectodermal_tumour	NS	NS	NS	female		19	asian	japan	Asian	pleura	Ewings_sarcoma	CCLE	DSMZ	round or fusiform cells growing in clumps as adherent or semi-adherent multicellular spheroids	90% RPMI 1640 +10% h.i.FBS	N/A	10%DMSO	~ 35 hrs	103.9	Ewings_Sarcoma	Ewings_sarcoma	Bone:Sarcoma_Ewing	129.371	SARC
S117_THYROID	ACH-000037	S-117	primary	soft_tissue	fibrous_tissue_and_uncertain_origin	thyroid	NS	sarcoma	NS	NS	NS	female		47			Caucasian			CCLE	DSMZ	Epithelial monolayer	RPMI+10%FBS	NA	10%DMSO		107.6	soft_tissue	thyroid	Soft_Tissue:Sarcoma_Others	70.2226	SARC
EM2_HAEMATOPOIETIC_AND_LYMPHOID_TISSUE	ACH-000295	EM-2	primary	haematopoietic_and_lymphoid_tissue	NS	NS	NS	haematopoietic_neoplasm	blast_phase_chronic_myeloid_leukaemia	NS	NS	female		5	caucasian		Caucasian			CCLE	DSMZ	single, round to oval cells in suspention	90% RPMI 1640 +10% h.i. FBS	N/A		~ 35-40 hrs	65.8	CML	CML	Leukemia:CML	117.04	LCML
OPM2_HAEMATOPOIETIC_AND_LYMPHOID_TISSUE	ACH-000024	OPM-2	primary	haematopoietic_and_lymphoid_tissue	NS	NS	NS	lymphoid_neoplasm	plasma_cell_myeloma	NS	NS	female		56			Asian		multiple_myeloma	CCLE	DSMZ	suspension	RPMI + 10 % FBS	NA	5%DMSO		93	multiple_myeloma	multiple_myeloma	Lymphoma:Multiple_Myeloma	149.103	MM
CAL62_THYROID	ACH-000174	CAL-62	primary	thyroid	NS	NS	NS	carcinoma	anaplastic_carcinoma	NS	NS	female		70			Caucasian			CCLE	DSMZ	epithelial-like cells growing in monolayers	DMEM + 10% FBS	N/A	10%DMSO	~ 24 hrs	26	thyroid	thyroid	Thyroid:Carcinoma	89.0244	THCA
LCLC103H_LUNG	ACH-000627	LCLC-103H	metastasis	lung	NS	NS	NS	carcinoma	large_cell_carcinoma	NS	NS	male		61	caucasian		Caucasian	pleura		CCLE	DSMZ	pleomorphic, gigantic, adherent cells growing as monolayer	90% RPMI 1640 +10% h. i. FBS	NA		~ 40 hrs	NA	lung_NSC	lung_NSC	Lung:NSCLC_Large_Cell	133.407	NA
JURKAT_HAEMATOPOIETIC_AND_LYMPHOID_TISSUE	ACH-000995	JURKAT	primary	haematopoietic_and_lymphoid_tissue	NS	NS	NS	lymphoid_neoplasm	acute_lymphoblastic_T_cell_leukaemia	NS	NS	male		14			Caucasian		TALL	CCLE	DSMZ	round cells growing singly or in clumps in suspention	90% RPMI 1640 +10% h.i.FBS	2mM L-glutamine		~ 25-35 hrs	NA	T-cell_ALL	T-cell_ALL	Leukemia:ALL	1452.95	ALL
697_HAEMATOPOIETIC_AND_LYMPHOID_TISSUE	ACH-000070	697	primary	haematopoietic_and_lymphoid_tissue	NS	NS	NS	lymphoid_neoplasm	acute_lymphoblastic_B_cell_leukaemia	NS	NS	male		12			Caucasian			CCLE	DSMZ	adherent	RPMI + 10 % FBS	NA	5% DMSO		46.6	leukemia_other	leukemia_other	Leukemia:ALL	75.6995	ALL
MHHCALL2_HAEMATOPOIETIC_AND_LYMPHOID_TISSUE	ACH-000020	MHH-CALL-2	primary	haematopoietic_and_lymphoid_tissue	NS	NS	NS	lymphoid_neoplasm	acute_lymphoblastic_B_cell_leukaemia	NS	NS	female		15	caucasian		Caucasian			CCLE	DSMZ	single, relatively small round cells growing in suspention	80% RPMI 1640 +20% h. i. FBS	NA		~ 100 hrs	NA	B-cell_ALL	B-cell_ALL	Leukemia:ALL	58.2927	ALL
M07E_HAEMATOPOIETIC_AND_LYMPHOID_TISSUE	ACH-000602	M-07e	primary	haematopoietic_and_lymphoid_tissue	NS	NS	NS	haematopoietic_neoplasm	acute_myeloid_leukaemia	M7	NS	female	pediatric	0.5			Caucasian			CCLE	DSMZ	single round cells in suspention, a few cells are lightly adherent	80-90% Iscove's MDM or RPMI 1640 +10-20% h. i. FBS	1L-3 ( 10ng/ml) or GM-CSF(10ng/ml) or 10-20% vol conditioned medium of cell line 5637(DSM-ACC 35)		~ 40 hrs	NA	AML	AML	Leukemia:AML	112.433	LAML
L428_HAEMATOPOIETIC_AND_LYMPHOID_TISSUE	ACH-000754	L-428	metastasis	haematopoietic_and_lymphoid_tissue	NS	NS	NS	lymphoid_neoplasm	Hodgkin_lymphoma	NS	NS	female		37			Caucasian	pleura	lymphoma	CCLE	DSMZ	Supsension	RPMI 1640 +10%FBS	NA	5% DMSO		NA	lymphoma_Hodgkin	lymphoma_Hodgkin	Lymphoma:Hodgkin	157.598	NA
MOLT16_HAEMATOPOIETIC_AND_LYMPHOID_TISSUE	ACH-000918	MOLT-16	primary	haematopoietic_and_lymphoid_tissue	NS	NS	NS	lymphoid_neoplasm	acute_lymphoblastic_T_cell_leukaemia	NS	NS	female		5			African_american			CCLE	DSMZ	round to elongated single cells growing in suspention	80-90% RPMI 1640 +10-20% h. i. FBS	NA		~ 30 hrs	NA	T-cell_ALL	T-cell_ALL	Leukemia:ALL	346.904	ALL
NB4_HAEMATOPOIETIC_AND_LYMPHOID_TISSUE	ACH-000294	NB-4	primary	haematopoietic_and_lymphoid_tissue	NS	NS	NS	haematopoietic_neoplasm	acute_myeloid_leukaemia	M3	NS	female		23			Caucasian			CCLE	DSMZ	single cells in suspention, round or polymorphic cells, very few are giant cells	90% rPMI 1640 + 10% h. i. FBS	NA		~ 35-45 hrs	NA	AML	AML	Leukemia:AML	110.907	LAML
LCLC97TM1_LUNG	ACH-000596	LCLC-97TM1	primary	lung	NS	NS	NS	carcinoma	large_cell_carcinoma	NS	NS	male		44	caucasian		Caucasian			CCLE	DSMZ	adherent epitheloid cells densely packed in islets,growing as monolayers	80% RPMI 1640 + 20% h. i. FBS	NA		> 50 hrs	NA	lung_NSC	lung_NSC	Lung:NSCLC_Large_Cell	147.915	NA
2313287_STOMACH	ACH-000948	23132/87	primary	stomach	NS	NS	NS	carcinoma	adenocarcinoma	NS	NS	male		72			Caucasian			CCLE	DSMZ	aderent epithelial cells growing as confluent monolayers	90%RPMI 1640+10% h.i FBS	n/a	10%DMSO	50 hrs	97.6	stomach	stomach	Gastric:Carcinoma	521.355	STAD
BHT101_THYROID	ACH-000191	BHT-101	metastasis	thyroid	NS	NS	NS	carcinoma	anaplastic_carcinoma	NS	NS	female		63			Caucasian	lymph_node		CCLE	DSMZ	epithelial- like cells growing in monolayers	80% Dulbecco's MEM +20% h.i. FBS +0.5% human serum (+0.005 lu/ml TSH +5ug/ml human insulin-cells grow also without these latter supplements)	0.5%human serum(+0.005	10%DMSO	~ 2-3 days	38.5	thyroid	thyroid	Thyroid:Carcinoma	103.971	THCA
JVM2_HAEMATOPOIETIC_AND_LYMPHOID_TISSUE	ACH-000106	JVM-2	primary	haematopoietic_and_lymphoid_tissue	NS	NS	NS	lymphoid_neoplasm	chronic_lymphocytic_leukaemia-small_lymphocytic_lymphoma	NS	NS	female		63			Caucasian		B-prolymphocytic_leukemia	CCLE	DSMZ	lymphoblastoid, round to polygonal cells growing in clusters in suspention	90% RPMI 1640 +10% h.i. FBS	NA		~ 50-70 hrs	NA	lymphoma_other	B-cell_lymphoma_other	Lymphoma:NH_B_cell	84.1528	CLL
CAL51_BREAST	ACH-000856	CAL-51	metastasis	breast	NS	NS	NS	carcinoma	NS	NS	NS	female		45			Caucasian	pleura	breast_cancer	CCLE	DSMZ	epithelial-like adherent cells growing in monolayers; the culture contains usually a large amount of cell debris	80% Dulbecco's MEM(4.5g/L glucose) +20% h.i.FBS	N/A	10%DMSO	>60 hrs	26.8	breast	breast	Breast:Carcinoma	206.842	BRCA
L363_HAEMATOPOIETIC_AND_LYMPHOID_TISSUE	ACH-000183	L-363	primary	haematopoietic_and_lymphoid_tissue	NS	NS	NS	lymphoid_neoplasm	plasma_cell_myeloma	NS	NS	female		36			Caucasian		plasma_cell_leukemia	CCLE	DSMZ	SUSPENSION	RPMI-1640+ 15% FBS				60.54	multiple_myeloma	multiple_myeloma	Lymphoma:Multiple_Myeloma	92.8822	MM
KMH2_HAEMATOPOIETIC_AND_LYMPHOID_TISSUE	ACH-000815	KM-H2	metastasis	haematopoietic_and_lymphoid_tissue	NS	NS	NS	lymphoid_neoplasm	Hodgkin_lymphoma	NS	NS	male		37			Asian	pleura	lymphoma	CCLE	NA	NA	NA	NA	NA	NA	NA	lymphoma_Hodgkin	lymphoma_Hodgkin	Lymphoma:Hodgkin	217.276	NA
SIMA_AUTONOMIC_GANGLIA	ACH-000099	SIMA	primary	autonomic_ganglia	NS	NS	NS	neuroblastoma	NS	NS	NS	male		1.6666	caucasian	europe	Caucasian			CCLE	DSMZ	cell shape is bipolar, cells growing as monolayer or forming foci	90% RPMI 1640 +10% h.i. FBS	2mM L-glutamine		highly variable ~ 34-100 hrs	NA	neuroblastoma	neuroblastoma	PNET:Neuroblastoma	84.1121	NB
NUDUL1_HAEMATOPOIETIC_AND_LYMPHOID_TISSUE	ACH-000287	NU-DUL-1	metastasis	haematopoietic_and_lymphoid_tissue	NS	NS	NS	lymphoid_neoplasm	B_cell_lymphoma_unspecified	NS	NS	male		43	caucasian		Caucasian	cerebrospinal_fluid		CCLE	DSMZ	polymorphic cells growing singly in suspention	85% RPMI 1640 +15% h. i. FBS	NA		~ 30-36 hrs	NA	lymphoma_other	B-cell_lymphoma_other	Lymphoma:NH_B_cell	87.6465	DLBC
BC3C_URINARY_TRACT	ACH-000593	BC-3C	primary	urinary_tract	bladder	NS	NS	carcinoma	transitional_cell_carcinoma	NS	NS	female		82	caucasian		Caucasian			CCLE	DSMZ	adherent monolayers	McCoy's 5A +10% FBS	NA	5% DMSO		40.7	urinary_tract	urinary_tract	Bladder:Carcinoma	117.99	BLCA
SUDHL6_HAEMATOPOIETIC_AND_LYMPHOID_TISSUE	ACH-000611	SU-DHL-6	metastasis	haematopoietic_and_lymphoid_tissue	NS	NS	NS	lymphoid_neoplasm	diffuse_large_B_cell_lymphoma	NS	NS	male		43			Caucasian	peritoneum	B-cell non-Hodgkin lymphoma	CCLE	DSMZ	SUSPENSION	RPMI-1640+ 20% FBS	NA	5% DMSO		48	lymphoma_DLBCL	lymphoma_DLBCL	Lymphoma:NH_B_cell	128.128	DLBC
KARPAS620_HAEMATOPOIETIC_AND_LYMPHOID_TISSUE	ACH-000193	KARPAS-620	primary	haematopoietic_and_lymphoid_tissue	NS	NS	NS	lymphoid_neoplasm	plasma_cell_myeloma	NS	NS	female		77			Caucasian		plasma_cell_leukemia	CCLE	DSMZ	single round to polymorph cells growing in suspension	80%RPMI-1640+20% FBS	NA	10%DMSO	60 hrs	67.6	multiple_myeloma	multiple_myeloma	Lymphoma:Multiple_Myeloma	86.3491	MM
REC1_HAEMATOPOIETIC_AND_LYMPHOID_TISSUE	ACH-000068	REC-1	primary	haematopoietic_and_lymphoid_tissue	NS	NS	NS	lymphoid_neoplasm	mantle_cell_lymphoma	NS	NS	male		61			Caucasian		mantle_cell_lymphoma	CCLE	DSMZ	small round cells growing singly or in clumps in suspention	90% RPMI 1640 +10% h.i. FBS	NA		~ 20-40 hrs	NA	lymphoma_other	B-cell_lymphoma_other	Lymphoma:NH_B_cell	84.2532	DLBC
OCIM1_HAEMATOPOIETIC_AND_LYMPHOID_TISSUE	ACH-000751	OCI-M1	primary	haematopoietic_and_lymphoid_tissue	NS	NS	NS	haematopoietic_neoplasm	acute_myeloid_leukaemia	M6	NS			62			Caucasian			CCLE	DSMZ	round cells growind singly in suspention	80-90% Iscove's MDM +10-20% h.i. FBS	NA		~ 30 hrs	NA	AML	AML	Leukemia:AML	171.079	LAML
MEC1_HAEMATOPOIETIC_AND_LYMPHOID_TISSUE	ACH-000405	MEC-1	primary	haematopoietic_and_lymphoid_tissue	lymph_node	NS	NS	lymphoid_neoplasm	chronic_lymphocytic_leukaemia-small_lymphocytic_lymphoma	NS	NS	male		61	caucasian		Caucasian		lymphoma	CCLE	DSMZ	round to polymorphic cells growing in suspention, singly or partly in small aggregates, a few cells are slightly adherent	90% Iscove's MDM +10% h. i. FBS	NA		~ 40 hrs	NA	lymphoma_other	B-cell_lymphoma_other	Leukemia:CLL	123.858	CLL
SIGM5_HAEMATOPOIETIC_AND_LYMPHOID_TISSUE	ACH-000112	SIG-M5	primary	haematopoietic_and_lymphoid_tissue	NS	NS	NS	haematopoietic_neoplasm	acute_myeloid_leukaemia	M5a	NS	male		63			Caucasian			CCLE	DSMZ	large round cells growing singly in suspention	80% Iscove's MDM + 20% h.i. FBS	NA		~ 72 hrs	NA	AML	AML	Leukemia:AML	93.0785	LAML
SUDHL5_HAEMATOPOIETIC_AND_LYMPHOID_TISSUE	ACH-000660	SU-DHL-5	primary	haematopoietic_and_lymphoid_tissue	NS	NS	NS	lymphoid_neoplasm	diffuse_large_B_cell_lymphoma	NS	NS	female		17			Caucasian	lymph_node	B-cell non-Hodgkin lymphoma	CCLE	DSMZ	Supsension	RPMI +10%FBS	NA	5% DMSO		NA	lymphoma_DLBCL	lymphoma_DLBCL	Lymphoma:NH_B_cell	126.247	DLBC
BCPAP_THYROID	ACH-000456	B-CPAP	primary	thyroid	NS	NS	NS	carcinoma	papillary_carcinoma	NS	NS	female		76			Caucasian			CCLE	DSMZ	Spindle- or round-shaped cells growing adherently as monolayer	90% RPMI 1640 + 10% h.i.FBS	NA	10%DMSO	~ 30 hrs	36.2	thyroid	thyroid	Thyroid:Carcinoma	112.526	THCA
639V_URINARY_TRACT	ACH-000973	639-V	primary	urinary_tract	ureter	NS	NS	carcinoma	transitional_cell_carcinoma	NS	NS	male		69	caucasian		Caucasian			CCLE	ATCC	Adherent epithelial monolayer	DMEM + 10% FBS	NA	10%DMSO		35.8	urinary_tract	urinary_tract	Bladder:Carcinoma	683.951	BLCA
CL11_LARGE_INTESTINE	ACH-000249	CL-11	primary	large_intestine	colon	NS	NS	carcinoma	adenocarcinoma	NS	NS			NA			Caucasian			CCLE	DSMZ	adherent epitheloid cells growing in monolayers and forming islets	80% mixture of Ham's F12 + Dulbecco's MEM (at 1:1) +20% h.i FBS	N/A	10%DMSO	~ 3-4 days	98.8	colorectal	colorectal	Colorectal:Carcinoma	94.3246	COAD/READ
TT2609C02_THYROID	ACH-000716	TT2609-C02	primary	thyroid	NS	NS	NS	carcinoma	follicular_carcinoma	NS	NS	male		57	caucasian		Caucasian			CCLE	DSMZ	small cells growing adherent but irregularly in monolayers	80-85% RPMI 1640 +15-20% h.i. FBS	1mM sodium pyruvate + insulin-transferrin-selentite medium supplement		~ 60-80 hrs	NA	thyroid	thyroid	Thyroid:Carcinoma	147.758	THCA
MEC2_HAEMATOPOIETIC_AND_LYMPHOID_TISSUE	ACH-001121	MEC-2	primary	haematopoietic_and_lymphoid_tissue	lymph_node	NS	NS	lymphoid_neoplasm	chronic_lymphocytic_leukaemia-small_lymphocytic_lymphoma	NS	NS	male		62	caucasian		Caucasian		lymphoma	CCLE	NA	NA	NA	NA	NA	NA	NA	lymphoma_other	B-cell_lymphoma_other	NA	NA	NA
CL34_LARGE_INTESTINE	ACH-000895	CL-34	primary	large_intestine	NS	NS	NS	carcinoma	adenocarcinoma	NS	NS	female		NA			Caucasian			CCLE	DSMZ	epithelial-like cells growing as monolayer; cells do not grow to complete confluency	DMEM:HAM's F12 1:1 +20% FBS	N/A	10%DMSO	~ 48 hrs	NA	colorectal	colorectal	Colorectal:Carcinoma	289.013	COAD/READ
RCHACV_HAEMATOPOIETIC_AND_LYMPHOID_TISSUE	ACH-000922	RCH-ACV	primary	haematopoietic_and_lymphoid_tissue	NS	NS	NS	lymphoid_neoplasm	acute_lymphoblastic_B_cell_leukaemia	NS	NS	female		8			Caucasian		acute lymphoblastic leukemia	CCLE	DSMZ	small round cells growing singly or in small clumps in suspention; accasional adherent cells present	80-90% RPMI 1640 +10-20% h.i. FBS	NA		~ 30-50 hrs	39.3	leukemia_other	leukemia_other	Leukemia:ALL	348.995	ALL
CAL120_BREAST	ACH-000212	CAL-120	metastasis	breast	NS	NS	NS	carcinoma	NS	NS	NS	female		43			Caucasian	pleura	breast_cancer	CCLE	DSMZ	ADHERENT CELLS, GROWING IN MONOLAYERS	DMEM+ 10% FBS	NA	5% DMSO		52.4	breast	breast	Breast:Carcinoma	99.2963	BRCA
647V_URINARY_TRACT	ACH-000896	647-V	primary	urinary_tract	bladder	NS	NS	carcinoma	transitional_cell_carcinoma	NS	NS	male		NA			Caucasian			CCLE	DSMZ	Adherent	DMEM +15%FBS	2 mM L-glutamine	10% DMSO		92.4	urinary_tract	urinary_tract	Bladder:Carcinoma	262.224	BLCA
RH18_SOFT_TISSUE	ACH-000689	RH-18	primary	soft_tissue	striated_muscle	abdomen	NS	rhabdomyosarcoma	alveolar	NS	NS	female	pediatric	2			NA			CCLE	DSMZ	large transparent epitheloid cells, partially with long extentions, growing as monolayers	80% RPMI 1640 +20% h.i. FBS	NA		~ 60-70 hrs	NA	soft_tissue	soft_tissue	Soft_Tissue:Sarcoma_Rhabdoid	138.713	SARC
MOLM16_HAEMATOPOIETIC_AND_LYMPHOID_TISSUE	ACH-000369	MOLM-16	primary	haematopoietic_and_lymphoid_tissue	NS	NS	NS	haematopoietic_neoplasm	acute_myeloid_leukaemia	M0	NS	female		77	asian	japan	Asian			CCLE	DSMZ	single or small clumps in suspension	RPMI-1640+20% FBS	10ng/ml GM-CSF	5% DMSO	50-80hrs	73.9	AML	AML	Leukemia:AML	136.47	LAML
F36P_HAEMATOPOIETIC_AND_LYMPHOID_TISSUE	ACH-000487	F-36P	metastasis	haematopoietic_and_lymphoid_tissue	NS	NS	NS	haematopoietic_neoplasm	acute_myeloid_leukaemia	M6	NS	male		68			Asian	pleura		CCLE	DSMZ	polymorph cells growing as adherent cells and singly in suspention	80% RPMI 1640 + 10% h.i.FBS	10 ng/ml GM-CSF		~ 24-36 hrs	NA	AML	AML	Leukemia:AML	167.751	LAML
EJM_HAEMATOPOIETIC_AND_LYMPHOID_TISSUE	ACH-000821	EJM	primary	haematopoietic_and_lymphoid_tissue	NS	NS	NS	lymphoid_neoplasm	plasma_cell_myeloma	NS	NS	female		58			Caucasian			CCLE	DSMZ	suspension	IMDM+ 20% FBS	NA	5%DMSO		220.4	multiple_myeloma	multiple_myeloma	Lymphoma:Multiple_Myeloma	162.799	MM
WSUDLCL2_HAEMATOPOIETIC_AND_LYMPHOID_TISSUE	ACH-000534	WSU-DLCL2	metastasis	haematopoietic_and_lymphoid_tissue	NS	NS	NS	lymphoid_neoplasm	diffuse_large_B_cell_lymphoma	NS	NS	male		41	caucasian		Caucasian	pleura	diffuse large cell lymphoma non-cleaved type	CCLE	DSMZ	supension	RPMI-1640 + 10% FBS	NA	10%DMSO		49.3	lymphoma_DLBCL	lymphoma_DLBCL	Lymphoma:NH_B_cell	100.837	DLBC
JIMT1_BREAST	ACH-000711	JIMT-1	metastasis	breast	NS	NS	NS	carcinoma	ductal_carcinoma	NS	NS	female		62			Caucasian	pleura	breast_cancer	CCLE	DSMZ	epithelial-like cells growing in monolayers	90% Dulbecco's MEM +10% h.i. FBS	NA		~ 30-40 hrs	NA	breast	breast	Breast:Carcinoma	158.027	BRCA
ML1_THYROID	ACH-000058	ML-1	primary	thyroid	NS	NS	NS	carcinoma	follicular_carcinoma	NS	NS			NA			Caucasian			CCLE	DSMZ	ADHERENT MONOLAYERS	DMEM+20% FBS	NA	5%DMSO	4-7 DAYS	66.9	thyroid	thyroid	Thyroid:Carcinoma	67.7007	THCA
AMO1_HAEMATOPOIETIC_AND_LYMPHOID_TISSUE	ACH-000838	AMO-1	primary	haematopoietic_and_lymphoid_tissue	NS	NS	NS	lymphoid_neoplasm	plasma_cell_myeloma	NS	NS	female		64			Asian		multiple_myeloma	CCLE	DSMZ	single suspension	RPMI-1640+20% FBS	NA	5% DMSO	50-90hrs	57.8	multiple_myeloma	multiple_myeloma	Lymphoma:Multiple_Myeloma	237.223	MM
MOLP8_HAEMATOPOIETIC_AND_LYMPHOID_TISSUE	ACH-000745	MOLP-8	primary	haematopoietic_and_lymphoid_tissue	NS	NS	NS	lymphoid_neoplasm	plasma_cell_myeloma	NS	NS	male		52	asian	japan	Asian			CCLE	DSMZ	single round cells in suspention, some cells loosely adherent	80% RPMI 1640 + 20% h. i. FBS	NA		~ 40 hrs	NA	multiple_myeloma	multiple_myeloma	Lymphoma:Multiple_Myeloma	211.689	MM
COLO699_LUNG	ACH-001041	COLO-699	metastasis	lung	NS	NS	NS	carcinoma	adenocarcinoma	NS	NS	female		57			Caucasian	pleura	lung_cancer	CCLE	DSMZ	Adherent, epitheloid cells growing in monolayers	90% RPMI 1640 + 10% h.i.FBS	N/A		~38 hrs	NA	lung_NSC	lung_NSC	Lung:NSCLC_Adeno	NA	LUAD
JHUEM7_ENDOMETRIUM	ACH-000993	JHUEM-7	primary	endometrium	NS	NS	NS	carcinoma	adenocarcinoma	NS	NS	female		58	asian	japan	Asian			CCLE	GNF						112.7	endometrium	endometrium	Endometrium:Carcinoma	1638.26	UCEC
KP1NL_PANCREAS	ACH-001108	KP-1NL	primary	pancreas	NS	NS	NS	carcinoma	ductal_carcinoma	NS	NS	male		69			Caucasian		Pancreatic Cancer	CCLE	NA	NA	NA	NA	NA	NA	NA	pancreas	pancreas	NA	NA	PAAD
KP1N_PANCREAS	ACH-001107	KP-1N	metastasis	pancreas	NS	NS	NS	carcinoma	ductal_carcinoma	NS	NS	male		69	asian	japan	Caucasian	liver		CCLE	NA	NA	NA	NA	NA	NA	NA	pancreas	pancreas	NA	NA	PAAD
M059J_CENTRAL_NERVOUS_SYSTEM	ACH-001118	NA	NA	NA	NA	NA	NA	NA	NA	NA	NA	NA	NA	NA	NA	NA	NA	NA	NA	NA	NA	NA	NA	NA	NA	NA	NA	NA	glioma	NA	NA	GBM
MB157_BREAST	ACH-001120	MB 157	metastasis	breast	NS	NS	NS	carcinoma	NS	NS	NS	female		48	african_american		African_american	pleura		CCLE	NA	NA	NA	NA	NA	NA	NA	breast	breast	NA	NA	BRCA
OE21_OESOPHAGUS	ACH-000544	OE21	primary	oesophagus	NS	NS	NS	carcinoma	squamous_cell_carcinoma	NS	NS	male		74			Caucasian		oesophageal squamous cell carcinoma	CCLE	HPACC	ADHERENT EPITHELIAL;	RPMI-1640+10% FBS	2mM L-GLUTAMINE	5%DMSO		59	esophagus	esophagus	Oesophagus:Carcinoma	108.461	ESCA
SF8657_SKIN	ACH-001187	SF8657	normal	skin	NS	NS	NS					male		63	asian	japan	NA		stomach cancer	collaborator	NA	NA	NA	NA	NA	NA	NA	melanoma	melanoma	NA	NA	SKCM
SNUC2B_LARGE_INTESTINE	ACH-001199	SNU-C2B	primary	large_intestine	caecum	NS	NS	carcinoma	adenocarcinoma	NS	NS	female		43	NA	NA	NA	NA	NA	COSMIC_MINT	NA	NA	NA	NA	NA	NA	NA	colorectal	colorectal	NA	NA	COAD/READ
NCIH2073_LUNG	ACH-000590	NCI-H2073	primary	lung	NS	NS	NS	carcinoma	adenocarcinoma	NS	NS	female		47	caucasian		Caucasian			CCLE	ATCC	adherent epithelial	RPMI-1640 + 10% FBS	NA	5%DMSO		152.5	lung_NSC	lung_NSC	Lung:NSCLC_Adeno	121.506	LUAD
HN_UPPER_AERODIGESTIVE_TRACT	ACH-001090	HN	metastasis	upper_aerodigestive_tract	mouth	mouth_roof	NS	carcinoma	squamous_cell_carcinoma	NS	NS	male		60	asian	japan	Asian	lymph_node		CCLE	NA	NA	NA	NA	NA	NA	NA	upper_aerodigestive	upper_aerodigestive	NA	NA	HNSC
HRT18_LARGE_INTESTINE	ACH-001091	HRT-18	primary	large_intestine	colon	NS	NS	carcinoma	adenocarcinoma	NS	NS	male		67			NA		colon_cancer	CCLE	NA	NA	NA	NA	NA	NA	NA	colorectal	colorectal	NA	NA	COAD/READ
HNT34_HAEMATOPOIETIC_AND_LYMPHOID_TISSUE	ACH-000299	NA	NA	NA	NA	NA	NA	NA	NA	NA	NA	NA	NA	NA	NA	NA	NA	NA	NA	NA	NA	NA	NA	NA	NA	NA	NA	NA	AML	NA	NA	LAML
PLB985_HAEMATOPOIETIC_AND_LYMPHOID_TISSUE	ACH-000034	PLB-985		haematopoietic_and_lymphoid_tissue	NS	NS	NS	haematopoietic_neoplasm	acute_myeloid_leukaemia	NS	NS			NA	NA	NA	Caucasian	NA	NA	COSMIC	NA	NA	NA	NA	NA	NA	NA	AML	AML	NA	NA	LAML
SKNO1_HAEMATOPOIETIC_AND_LYMPHOID_TISSUE	ACH-001656	SKNO-1		haematopoietic_and_lymphoid_tissue	NS	NS	NS	haematopoietic_neoplasm	acute_myeloid_leukaemia	NS	NS			NA	NA	NA	Asian	NA	NA	COSMIC	NA	NA	NA	NA	NA	NA	NA	AML	AML	NA	NA	LAML
MOLT3_HAEMATOPOIETIC_AND_LYMPHOID_TISSUE	ACH-000964	MOLT-3		haematopoietic_and_lymphoid_tissue	NS	NS	NS	lymphoid_neoplasm	acute_lymphoblastic_T_cell_leukaemia	NS	NS	male		19			Caucasian		leukaemia	COSMIC	PT-6ZZI	suspension	RPMI + 10 % FBS	NA	5% DMSO		50.9	T-cell_ALL	T-cell_ALL	Leukemia:ALL	529.677	ALL
HOP62_LUNG	ACH-000861	HOP-62	primary	lung	NS	NS	NS	carcinoma	adenocarcinoma	NS	NS			NA			Caucasian			CCLE	Garraway Lab	Adherent	RPMI-1640+ 5% FBS	NA	5% DMSO		37.8	lung_NSC	lung_NSC	Lung:NSCLC_Others	236.524	LUAD
EKVX_LUNG	ACH-000706	EKVX	primary	lung	NS	NS	NS	carcinoma	adenocarcinoma	NS	NS			NA			Caucasian			CCLE	Garraway Lab	Adherent	RPMI-1640+ 5% FBS	NA	5% DMSO		68.4	lung_NSC	lung_NSC	Lung:NSCLC_Others	169.365	LUAD
OVCAR5_OVARY	ACH-001151	OVCAR-5	primary	ovary	NS	NS	NS	carcinoma	NS	NS	NS	female		NA			NA			CCLE	Garraway Lab	Adherent	RPMI-1640+ 5% FBS	NA	5% DMSO		28.8	ovary	ovary	Ovary:Carcinoma	NA	OV
UO31_KIDNEY	ACH-000428	UO-31	primary	kidney	NS	NS	NS	carcinoma	renal_cell_carcinoma	NS	NS	male		NA			Caucasian			CCLE	Garraway Lab	Adherent	RPMI-1640+ 5% FBS	NA	5% DMSO		27.8	kidney	kidney	Kidney:Carcinoma	98.6867	KIRC
TK10_KIDNEY	ACH-001208	NA	NA	NA	NA	NA	NA	NA	NA	NA	NA	NA	NA	NA	NA	NA	NA	NA	NA	NA	Garraway Lab	Adherent	RPMI-1640+ 5% FBS	NA	5% DMSO		38.9	NA	kidney	NA	NA	KIRC
SF268_CENTRAL_NERVOUS_SYSTEM	ACH-000655	SF268	primary	central_nervous_system	brain	NS	NS	glioma	NS	NS	NS			NA			Caucasian			CCLE	Garraway Lab	Mix	RPMI-1640+ 5% FBS	NA	5% DMSO		63	glioma	glioma	CNS:Glioma_HighGrade	157.81	GBM
SF539_CENTRAL_NERVOUS_SYSTEM	ACH-000273	SF539	primary	central_nervous_system	brain	NS	NS	glioma	NS	NS	NS			NA			Caucasian			CCLE	Garraway Lab	Mix	RPMI-1640+ 5% FBS	NA	5% DMSO		105.3	glioma	glioma	CNS:Glioma_HighGrade	107.541	LGG
SNB75_CENTRAL_NERVOUS_SYSTEM	ACH-000504	SNB75	primary	central_nervous_system	brain	NS	NS	glioma	NS	NS	NS			NA			Caucasian			CCLE	Garraway Lab	Adherent	RPMI-1640+ 5% FBS	NA	5% DMSO		54	glioma	glioma	CNS:Glioma_HighGrade	106.365	GBM
HOP92_LUNG	ACH-000825	HOP-92	primary	lung	NS	NS	NS	carcinoma	large_cell_carcinoma	NS	NS			NA			Caucasian			CCLE	Garraway Lab	Mix	RPMI-1640+ 5% FBS	NA	5% DMSO		122.2	lung_NSC	lung_NSC	Lung:NSCLC_Others	198.739	NA
ACCS_URINARY_TRACT	ACH-001011	ACCS	primary	urinary_tract	bladder	NS	NS	carcinoma	transitional_cell_carcinoma	NS	NS	female		81	caucasian		NA		transitional_cell_carcinoma	CCLE	NA	NA	NA	NA	NA	NA	NA	urinary_tract	urinary_tract	NA	NA	BLCA
MUTZ3_HAEMATOPOIETIC_AND_LYMPHOID_TISSUE	ACH-000084	MUTZ-3	primary	haematopoietic_and_lymphoid_tissue	NS	NS	NS	haematopoietic_neoplasm	acute_myeloid_leukaemia	M4	NS	male		29			Caucasian			CCLE	DSMZ	Suspension; Extremely slow grower	MEM + 20% FBS	10ng/ml SCF	10%DMSO		NA	AML	AML	NA	83.5347	LAML
A427_LUNG	ACH-000757	NA	NA	NA	NA	NA	NA	NA	NA	NA	NA	NA	NA	NA	NA	NA	NA	NA	NA	NA	NA	NA	NA	NA	NA	NA	NA	NA	lung_NSC	NA	NA	UNABLE TO CLASSIFY
BT12_SOFT_TISSUE	ACH-000160	NA	NA	NA	NA	NA	NA	NA	NA	NA	NA	NA	NA	NA	NA	NA	NA	NA	NA	NA	NA	NA	NA	NA	NA	NA	NA	NA	NA	NA	NA	NA
C8166_HAEMATOPOIETIC_AND_LYMPHOID_TISSUE	ACH-000206	NA	NA	NA	NA	NA	NA	NA	NA	NA	NA	NA	NA	NA	NA	NA	NA	NA	NA	NA	NA	NA	NA	NA	NA	NA	NA	NA	NA	NA	NA	NA
CACO2_LARGE_INTESTINE	ACH-000003	NA	NA	NA	NA	NA	NA	NA	NA	NA	NA	NA	NA	NA	NA	NA	NA	NA	NA	NA	NA	NA	NA	NA	NA	NA	NA	NA	colorectal	NA	NA	COAD/READ
HCC2429_LUNG	ACH-000143	NA	NA	NA	NA	NA	NA	NA	NA	NA	NA	NA	NA	NA	NA	NA	NA	NA	NA	NA	NA	NA	NA	NA	NA	NA	NA	NA	NA	NA	NA	NA
HCC2450_LUNG	ACH-000975	NA	NA	NA	NA	NA	NA	NA	NA	NA	NA	NA	NA	NA	NA	NA	NA	NA	NA	NA	NA	NA	NA	NA	NA	NA	NA	NA	NA	NA	NA	NA
HCC461_LUNG	ACH-000339	NA	NA	NA	NA	NA	NA	NA	NA	NA	NA	NA	NA	NA	NA	NA	NA	NA	NA	NA	NA	NA	NA	NA	NA	NA	NA	NA	NA	NA	NA	NA
HCC515_LUNG	ACH-000872	NA	NA	NA	NA	NA	NA	NA	NA	NA	NA	NA	NA	NA	NA	NA	NA	NA	NA	NA	NA	NA	NA	NA	NA	NA	NA	NA	NA	NA	NA	NA
INA6_HAEMATOPOIETIC_AND_LYMPHOID_TISSUE	ACH-000512	NA	NA	NA	NA	NA	NA	NA	NA	NA	NA	NA	NA	NA	NA	NA	NA	NA	NA	NA	NA	NA	NA	NA	NA	NA	NA	NA	NA	NA	NA	NA
KD_SOFT_TISSUE	ACH-001099	NA	NA	NA	NA	NA	NA	NA	NA	NA	NA	NA	NA	NA	NA	NA	NA	NA	NA	NA	NA	NA	NA	NA	NA	NA	NA	NA	NA	NA	NA	NA
KPMRTRY_SOFT_TISSUE	ACH-001109	NA	NA	NA	NA	NA	NA	NA	NA	NA	NA	NA	NA	NA	NA	NA	NA	NA	NA	NA	NA	NA	NA	NA	NA	NA	NA	NA	NA	NA	NA	NA
MON_SOFT_TISSUE	ACH-001128	NA	NA	NA	NA	NA	NA	NA	NA	NA	NA	NA	NA	NA	NA	NA	NA	NA	NA	NA	NA	NA	NA	NA	NA	NA	NA	NA	NA	NA	NA	NA
NCIH2004RT_SOFT_TISSUE	ACH-000533	NA	NA	NA	NA	NA	NA	NA	NA	NA	NA	NA	NA	NA	NA	NA	NA	NA	NA	NA	NA	NA	NA	NA	NA	NA	NA	NA	NA	NA	NA	NA
NCIH2077_LUNG	ACH-000010	NA	NA	NA	NA	NA	NA	NA	NA	NA	NA	NA	NA	NA	NA	NA	NA	NA	NA	NA	NA	NA	NA	NA	NA	NA	NA	NA	NA	NA	NA	NA
NCIH2882_LUNG	ACH-000700	NA	NA	NA	NA	NA	NA	NA	NA	NA	NA	NA	NA	NA	NA	NA	NA	NA	NA	NA	NA	NA	NA	NA	NA	NA	NA	NA	NA	NA	NA	NA
NCIH2887_LUNG	ACH-000251	NA	NA	NA	NA	NA	NA	NA	NA	NA	NA	NA	NA	NA	NA	NA	NA	NA	NA	NA	NA	NA	NA	NA	NA	NA	NA	NA	NA	NA	NA	NA
NCIH1819_LUNG	ACH-000033	NA	NA	NA	NA	NA	NA	NA	NA	NA	NA	NA	NA	NA	NA	NA	NA	NA	NA	NA	NA	NA	NA	NA	NA	NA	NA	NA	NA	NA	NA	NA
NCIH3122_LUNG	ACH-000337	NA	NA	NA	NA	NA	NA	NA	NA	NA	NA	NA	NA	NA	NA	NA	NA	NA	NA	NA	NA	NA	NA	NA	NA	NA	NA	NA	lung_NSC	NA	NA	LUAD
NHAHTDD_CENTRAL_NERVOUS_SYSTEM	ACH-001142	NA	NA	NA	NA	NA	NA	NA	NA	NA	NA	NA	NA	NA	NA	NA	NA	NA	NA	NA	NA	NA	NA	NA	NA	NA	NA	NA	NA	NA	NA	NA
OCIMY5_HAEMATOPOIETIC_AND_LYMPHOID_TISSUE	ACH-000854	NA	NA	NA	NA	NA	NA	NA	NA	NA	NA	NA	NA	NA	NA	NA	NA	NA	NA	NA	NA	NA	NA	NA	NA	NA	NA	NA	NA	NA	NA	NA
OCIMY7_HAEMATOPOIETIC_AND_LYMPHOID_TISSUE	ACH-000436	NA	NA	NA	NA	NA	NA	NA	NA	NA	NA	NA	NA	NA	NA	NA	NA	NA	NA	NA	NA	NA	NA	NA	NA	NA	NA	NA	NA	NA	NA	NA
OPM1_HAEMATOPOIETIC_AND_LYMPHOID_TISSUE	ACH-000057	NA	NA	NA	NA	NA	NA	NA	NA	NA	NA	NA	NA	NA	NA	NA	NA	NA	NA	NA	NA	NA	NA	NA	NA	NA	NA	NA	multiple_myeloma	NA	NA	MM
PC9_LUNG	ACH-000779	NA	NA	NA	NA	NA	NA	NA	NA	NA	NA	NA	NA	NA	NA	NA	NA	NA	NA	NA	NA	NA	NA	NA	NA	NA	NA	NA	lung_NSC	NA	NA	LUAD
SKNEP1_BONE	ACH-001192	NA	NA	NA	NA	NA	NA	NA	NA	NA	NA	NA	NA	NA	NA	NA	NA	NA	NA	NA	NA	NA	NA	NA	NA	NA	NA	NA	kidney	NA	NA	KIRC
SKPNDW_BONE	ACH-001193	NA	NA	NA	NA	NA	NA	NA	NA	NA	NA	NA	NA	NA	NA	NA	NA	NA	NA	NA	NA	NA	NA	NA	NA	NA	NA	NA	Ewings_sarcoma	NA	NA	NA
STM9101_SOFT_TISSUE	ACH-001200	NA	NA	NA	NA	NA	NA	NA	NA	NA	NA	NA	NA	NA	NA	NA	NA	NA	NA	NA	NA	NA	NA	NA	NA	NA	NA	NA	NA	NA	NA	NA
SIHA_CERVIX	ACH-000556	NA	NA	NA	NA	NA	NA	NA	NA	NA	NA	NA	NA	NA	NA	NA	NA	NA	NA	NA	NA	NA	NA	NA	NA	NA	NA	NA	cervix	NA	NA	CESC
TM87_SOFT_TISSUE	ACH-000172	NA	NA	NA	NA	NA	NA	NA	NA	NA	NA	NA	NA	NA	NA	NA	NA	NA	NA	NA	NA	NA	NA	NA	NA	NA	NA	NA	NA	NA	NA	NA
TTC709_SOFT_TISSUE	ACH-000597	NA	NA	NA	NA	NA	NA	NA	NA	NA	NA	NA	NA	NA	NA	NA	NA	NA	NA	NA	NA	NA	NA	NA	NA	NA	NA	NA	NA	NA	NA	NA
TTC1240_SOFT_TISSUE	ACH-001210	NA	NA	NA	NA	NA	NA	NA	NA	NA	NA	NA	NA	NA	NA	NA	NA	NA	NA	NA	NA	NA	NA	NA	NA	NA	NA	NA	NA	NA	NA	NA
TTC549_SOFT_TISSUE	ACH-001211	NA	NA	NA	NA	NA	NA	NA	NA	NA	NA	NA	NA	NA	NA	NA	NA	NA	NA	NA	NA	NA	NA	NA	NA	NA	NA	NA	NA	NA	NA	NA
TTC642_SOFT_TISSUE	ACH-001212	NA	NA	NA	NA	NA	NA	NA	NA	NA	NA	NA	NA	NA	NA	NA	NA	NA	NA	NA	NA	NA	NA	NA	NA	NA	NA	NA	NA	NA	NA	NA
BT16_SOFT_TISSUE	ACH-001020	NA	NA	NA	NA	NA	NA	NA	NA	NA	NA	NA	NA	NA	NA	NA	NA	NA	NA	NA	NA	NA	NA	NA	NA	NA	NA	NA	NA	NA	NA	NA
CW9019_SOFT_TISSUE	ACH-001050	NA	NA	NA	NA	NA	NA	NA	NA	NA	NA	NA	NA	NA	NA	NA	NA	NA	NA	NA	NA	NA	NA	NA	NA	NA	NA	NA	NA	NA	NA	NA
D384_CENTRAL_NERVOUS_SYSTEM	ACH-001052	NA	NA	NA	NA	NA	NA	NA	NA	NA	NA	NA	NA	NA	NA	NA	NA	NA	NA	NA	NA	NA	NA	NA	NA	NA	NA	NA	NA	NA	NA	NA
D425_CENTRAL_NERVOUS_SYSTEM	ACH-001053	NA	NA	NA	NA	NA	NA	NA	NA	NA	NA	NA	NA	NA	NA	NA	NA	NA	NA	NA	NA	NA	NA	NA	NA	NA	NA	NA	NA	NA	NA	NA
D458_CENTRAL_NERVOUS_SYSTEM	ACH-001054	NA	NA	NA	NA	NA	NA	NA	NA	NA	NA	NA	NA	NA	NA	NA	NA	NA	NA	NA	NA	NA	NA	NA	NA	NA	NA	NA	NA	NA	NA	NA
D556_CENTRAL_NERVOUS_SYSTEM	ACH-001055	NA	NA	NA	NA	NA	NA	NA	NA	NA	NA	NA	NA	NA	NA	NA	NA	NA	NA	NA	NA	NA	NA	NA	NA	NA	NA	NA	NA	NA	NA	NA
JR_SOFT_TISSUE	ACH-001096	NA	NA	NA	NA	NA	NA	NA	NA	NA	NA	NA	NA	NA	NA	NA	NA	NA	NA	NA	NA	NA	NA	NA	NA	NA	NA	NA	NA	NA	NA	NA
MKL1_SKIN	ACH-001122	NA	NA	NA	NA	NA	NA	NA	NA	NA	NA	NA	NA	NA	NA	NA	NA	NA	NA	NA	NA	NA	NA	NA	NA	NA	NA	NA	NA	NA	NA	NA
MKL2_SKIN	ACH-001123	NA	NA	NA	NA	NA	NA	NA	NA	NA	NA	NA	NA	NA	NA	NA	NA	NA	NA	NA	NA	NA	NA	NA	NA	NA	NA	NA	NA	NA	NA	NA
PETA_SKIN	ACH-001170	NA	NA	NA	NA	NA	NA	NA	NA	NA	NA	NA	NA	NA	NA	NA	NA	NA	NA	NA	NA	NA	NA	NA	NA	NA	NA	NA	NA	NA	NA	NA
SMSCTR_SOFT_TISSUE	ACH-001196	NA	NA	NA	NA	NA	NA	NA	NA	NA	NA	NA	NA	NA	NA	NA	NA	NA	NA	NA	NA	NA	NA	NA	NA	NA	NA	NA	NA	NA	NA	NA
SUMB002_CENTRAL_NERVOUS_SYSTEM	ACH-001201	NA	NA	NA	NA	NA	NA	NA	NA	NA	NA	NA	NA	NA	NA	NA	NA	NA	NA	NA	NA	NA	NA	NA	NA	NA	NA	NA	NA	NA	NA	NA
BB30HNC_UPPER_AERODIGESTIVE_TRACT	ACH-002212	NA	NA	NA	NA	NA	NA	NA	NA	NA	NA	NA	NA	NA	NA	NA	NA	NA	NA	NA	NA	NA	NA	NA	NA	NA	NA	NA	upper_aerodigestive	NA	NA	HNSC
BB49HNC_UPPER_AERODIGESTIVE_TRACT	ACH-002213	NA	NA	NA	NA	NA	NA	NA	NA	NA	NA	NA	NA	NA	NA	NA	NA	NA	NA	NA	NA	NA	NA	NA	NA	NA	NA	NA	upper_aerodigestive	NA	NA	HNSC
BICR10_UPPER_AERODIGESTIVE_TRACT	ACH-001331	NA	NA	NA	NA	NA	NA	NA	NA	NA	NA	NA	NA	NA	NA	NA	NA	NA	NA	NA	NA	NA	NA	NA	NA	NA	NA	NA	upper_aerodigestive	NA	NA	HNSC
BICR78_UPPER_AERODIGESTIVE_TRACT	ACH-001332	NA	NA	NA	NA	NA	NA	NA	NA	NA	NA	NA	NA	NA	NA	NA	NA	NA	NA	NA	NA	NA	NA	NA	NA	NA	NA	NA	upper_aerodigestive	NA	NA	HNSC
CA922_UPPER_AERODIGESTIVE_TRACT	ACH-002043	NA	NA	NA	NA	NA	NA	NA	NA	NA	NA	NA	NA	NA	NA	NA	NA	NA	NA	NA	NA	NA	NA	NA	NA	NA	NA	NA	upper_aerodigestive	NA	NA	HNSC
DOK_UPPER_AERODIGESTIVE_TRACT	ACH-002234	NA	NA	NA	NA	NA	NA	NA	NA	NA	NA	NA	NA	NA	NA	NA	NA	NA	NA	NA	NA	NA	NA	NA	NA	NA	NA	NA	upper_aerodigestive	NA	NA	HNSC
H3118_UPPER_AERODIGESTIVE_TRACT	ACH-002239	NA	NA	NA	NA	NA	NA	NA	NA	NA	NA	NA	NA	NA	NA	NA	NA	NA	NA	NA	NA	NA	NA	NA	NA	NA	NA	NA	upper_aerodigestive	NA	NA	HNSC
HO1N1_UPPER_AERODIGESTIVE_TRACT	ACH-002244	NA	NA	NA	NA	NA	NA	NA	NA	NA	NA	NA	NA	NA	NA	NA	NA	NA	NA	NA	NA	NA	NA	NA	NA	NA	NA	NA	upper_aerodigestive	NA	NA	HNSC
HO1U1_UPPER_AERODIGESTIVE_TRACT	ACH-002045	NA	NA	NA	NA	NA	NA	NA	NA	NA	NA	NA	NA	NA	NA	NA	NA	NA	NA	NA	NA	NA	NA	NA	NA	NA	NA	NA	upper_aerodigestive	NA	NA	HNSC
JHU011_UPPER_AERODIGESTIVE_TRACT	ACH-002249	NA	NA	NA	NA	NA	NA	NA	NA	NA	NA	NA	NA	NA	NA	NA	NA	NA	NA	NA	NA	NA	NA	NA	NA	NA	NA	NA	upper_aerodigestive	NA	NA	HNSC
JHU022_UPPER_AERODIGESTIVE_TRACT	ACH-002250	NA	NA	NA	NA	NA	NA	NA	NA	NA	NA	NA	NA	NA	NA	NA	NA	NA	NA	NA	NA	NA	NA	NA	NA	NA	NA	NA	upper_aerodigestive	NA	NA	HNSC
KON_UPPER_AERODIGESTIVE_TRACT	ACH-001542	NA	NA	NA	NA	NA	NA	NA	NA	NA	NA	NA	NA	NA	NA	NA	NA	NA	NA	NA	NA	NA	NA	NA	NA	NA	NA	NA	upper_aerodigestive	NA	NA	HNSC
KOSC2_UPPER_AERODIGESTIVE_TRACT	ACH-002260	NA	NA	NA	NA	NA	NA	NA	NA	NA	NA	NA	NA	NA	NA	NA	NA	NA	NA	NA	NA	NA	NA	NA	NA	NA	NA	NA	upper_aerodigestive	NA	NA	HNSC
LB771HNC_UPPER_AERODIGESTIVE_TRACT	ACH-002265	NA	NA	NA	NA	NA	NA	NA	NA	NA	NA	NA	NA	NA	NA	NA	NA	NA	NA	NA	NA	NA	NA	NA	NA	NA	NA	NA	upper_aerodigestive	NA	NA	HNSC
OSC19_UPPER_AERODIGESTIVE_TRACT	ACH-001625	NA	NA	NA	NA	NA	NA	NA	NA	NA	NA	NA	NA	NA	NA	NA	NA	NA	NA	NA	NA	NA	NA	NA	NA	NA	NA	NA	upper_aerodigestive	NA	NA	HNSC
OSC20_UPPER_AERODIGESTIVE_TRACT	ACH-001626	NA	NA	NA	NA	NA	NA	NA	NA	NA	NA	NA	NA	NA	NA	NA	NA	NA	NA	NA	NA	NA	NA	NA	NA	NA	NA	NA	upper_aerodigestive	NA	NA	HNSC
PCI15A_UPPER_AERODIGESTIVE_TRACT	ACH-002294	NA	NA	NA	NA	NA	NA	NA	NA	NA	NA	NA	NA	NA	NA	NA	NA	NA	NA	NA	NA	NA	NA	NA	NA	NA	NA	NA	upper_aerodigestive	NA	NA	HNSC
PCI30_UPPER_AERODIGESTIVE_TRACT	ACH-002295	NA	NA	NA	NA	NA	NA	NA	NA	NA	NA	NA	NA	NA	NA	NA	NA	NA	NA	NA	NA	NA	NA	NA	NA	NA	NA	NA	upper_aerodigestive	NA	NA	HNSC
PCI38_UPPER_AERODIGESTIVE_TRACT	ACH-002296	NA	NA	NA	NA	NA	NA	NA	NA	NA	NA	NA	NA	NA	NA	NA	NA	NA	NA	NA	NA	NA	NA	NA	NA	NA	NA	NA	upper_aerodigestive	NA	NA	HNSC
PCI4B_UPPER_AERODIGESTIVE_TRACT	ACH-002297	NA	NA	NA	NA	NA	NA	NA	NA	NA	NA	NA	NA	NA	NA	NA	NA	NA	NA	NA	NA	NA	NA	NA	NA	NA	NA	NA	upper_aerodigestive	NA	NA	HNSC
PCI6A_UPPER_AERODIGESTIVE_TRACT	ACH-002298	NA	NA	NA	NA	NA	NA	NA	NA	NA	NA	NA	NA	NA	NA	NA	NA	NA	NA	NA	NA	NA	NA	NA	NA	NA	NA	NA	upper_aerodigestive	NA	NA	HNSC
RPMI2650_UPPER_AERODIGESTIVE_TRACT	ACH-001385	NA	NA	NA	NA	NA	NA	NA	NA	NA	NA	NA	NA	NA	NA	NA	NA	NA	NA	NA	NA	NA	NA	NA	NA	NA	NA	NA	upper_aerodigestive	NA	NA	HNSC
SAS_UPPER_AERODIGESTIVE_TRACT	ACH-002029	NA	NA	NA	NA	NA	NA	NA	NA	NA	NA	NA	NA	NA	NA	NA	NA	NA	NA	NA	NA	NA	NA	NA	NA	NA	NA	NA	upper_aerodigestive	NA	NA	HNSC
SAT_UPPER_AERODIGESTIVE_TRACT	ACH-001641	NA	NA	NA	NA	NA	NA	NA	NA	NA	NA	NA	NA	NA	NA	NA	NA	NA	NA	NA	NA	NA	NA	NA	NA	NA	NA	NA	upper_aerodigestive	NA	NA	HNSC
SKN3_UPPER_AERODIGESTIVE_TRACT	ACH-002305	NA	NA	NA	NA	NA	NA	NA	NA	NA	NA	NA	NA	NA	NA	NA	NA	NA	NA	NA	NA	NA	NA	NA	NA	NA	NA	NA	upper_aerodigestive	NA	NA	HNSC
ESO26_OESOPHAGUS	ACH-001496	NA	NA	NA	NA	NA	NA	NA	NA	NA	NA	NA	NA	NA	NA	NA	NA	NA	NA	NA	NA	NA	NA	NA	NA	NA	NA	NA	esophagus	NA	NA	ESCA
ESO51_OESOPHAGUS	ACH-001497	NA	NA	NA	NA	NA	NA	NA	NA	NA	NA	NA	NA	NA	NA	NA	NA	NA	NA	NA	NA	NA	NA	NA	NA	NA	NA	NA	esophagus	NA	NA	ESCA
FLO1_OESOPHAGUS	ACH-001500	NA	NA	NA	NA	NA	NA	NA	NA	NA	NA	NA	NA	NA	NA	NA	NA	NA	NA	NA	NA	NA	NA	NA	NA	NA	NA	NA	esophagus	NA	NA	ESCA
HCE4_OESOPHAGUS	ACH-002243	NA	NA	NA	NA	NA	NA	NA	NA	NA	NA	NA	NA	NA	NA	NA	NA	NA	NA	NA	NA	NA	NA	NA	NA	NA	NA	NA	esophagus	NA	NA	ESCA
KYAE1_OESOPHAGUS	ACH-001544	NA	NA	NA	NA	NA	NA	NA	NA	NA	NA	NA	NA	NA	NA	NA	NA	NA	NA	NA	NA	NA	NA	NA	NA	NA	NA	NA	esophagus	NA	NA	ESCA
KYSE220_OESOPHAGUS	ACH-002263	NA	NA	NA	NA	NA	NA	NA	NA	NA	NA	NA	NA	NA	NA	NA	NA	NA	NA	NA	NA	NA	NA	NA	NA	NA	NA	NA	esophagus	NA	NA	ESCA
KYSE50_OESOPHAGUS	ACH-002264	NA	NA	NA	NA	NA	NA	NA	NA	NA	NA	NA	NA	NA	NA	NA	NA	NA	NA	NA	NA	NA	NA	NA	NA	NA	NA	NA	esophagus	NA	NA	ESCA
OACM51_OESOPHAGUS	ACH-001368	NA	NA	NA	NA	NA	NA	NA	NA	NA	NA	NA	NA	NA	NA	NA	NA	NA	NA	NA	NA	NA	NA	NA	NA	NA	NA	NA	esophagus	NA	NA	ESCA
OACP4C_OESOPHAGUS	ACH-002292	NA	NA	NA	NA	NA	NA	NA	NA	NA	NA	NA	NA	NA	NA	NA	NA	NA	NA	NA	NA	NA	NA	NA	NA	NA	NA	NA	esophagus	NA	NA	ESCA
SKGT4_OESOPHAGUS	ACH-001654	NA	NA	NA	NA	NA	NA	NA	NA	NA	NA	NA	NA	NA	NA	NA	NA	NA	NA	NA	NA	NA	NA	NA	NA	NA	NA	NA	esophagus	NA	NA	ESCA
TE12_OESOPHAGUS	ACH-002311	NA	NA	NA	NA	NA	NA	NA	NA	NA	NA	NA	NA	NA	NA	NA	NA	NA	NA	NA	NA	NA	NA	NA	NA	NA	NA	NA	esophagus	NA	NA	ESCA
CESS_HAEMATOPOIETIC_AND_LYMPHOID_TISSUE	ACH-002218	NA	NA	NA	NA	NA	NA	NA	NA	NA	NA	NA	NA	NA	NA	NA	NA	NA	NA	NA	NA	NA	NA	NA	NA	NA	NA	NA	AML	NA	NA	LAML
CTV1_HAEMATOPOIETIC_AND_LYMPHOID_TISSUE	ACH-002222	NA	NA	NA	NA	NA	NA	NA	NA	NA	NA	NA	NA	NA	NA	NA	NA	NA	NA	NA	NA	NA	NA	NA	NA	NA	NA	NA	AML	NA	NA	LAML
KMOE2_HAEMATOPOIETIC_AND_LYMPHOID_TISSUE	ACH-002258	NA	NA	NA	NA	NA	NA	NA	NA	NA	NA	NA	NA	NA	NA	NA	NA	NA	NA	NA	NA	NA	NA	NA	NA	NA	NA	NA	AML	NA	NA	LAML
NKM1_HAEMATOPOIETIC_AND_LYMPHOID_TISSUE	ACH-002290	NA	NA	NA	NA	NA	NA	NA	NA	NA	NA	NA	NA	NA	NA	NA	NA	NA	NA	NA	NA	NA	NA	NA	NA	NA	NA	NA	AML	NA	NA	LAML
QIMRWIL_HAEMATOPOIETIC_AND_LYMPHOID_TISSUE	ACH-002299	NA	NA	NA	NA	NA	NA	NA	NA	NA	NA	NA	NA	NA	NA	NA	NA	NA	NA	NA	NA	NA	NA	NA	NA	NA	NA	NA	AML	NA	NA	LAML
BALL1_HAEMATOPOIETIC_AND_LYMPHOID_TISSUE	ACH-002211	NA	NA	NA	NA	NA	NA	NA	NA	NA	NA	NA	NA	NA	NA	NA	NA	NA	NA	NA	NA	NA	NA	NA	NA	NA	NA	NA	B-cell_ALL	NA	NA	NA
KARPAS231_HAEMATOPOIETIC_AND_LYMPHOID_TISSUE	ACH-002255	NA	NA	NA	NA	NA	NA	NA	NA	NA	NA	NA	NA	NA	NA	NA	NA	NA	NA	NA	NA	NA	NA	NA	NA	NA	NA	NA	B-cell_ALL	NA	NA	NA
MHHPREB1_HAEMATOPOIETIC_AND_LYMPHOID_TISSUE	ACH-002272	NA	NA	NA	NA	NA	NA	NA	NA	NA	NA	NA	NA	NA	NA	NA	NA	NA	NA	NA	NA	NA	NA	NA	NA	NA	NA	NA	B-cell_ALL	NA	NA	NA
MN60_HAEMATOPOIETIC_AND_LYMPHOID_TISSUE	ACH-002275	NA	NA	NA	NA	NA	NA	NA	NA	NA	NA	NA	NA	NA	NA	NA	NA	NA	NA	NA	NA	NA	NA	NA	NA	NA	NA	NA	B-cell_ALL	NA	NA	NA
ROS50_HAEMATOPOIETIC_AND_LYMPHOID_TISSUE	ACH-001639	NA	NA	NA	NA	NA	NA	NA	NA	NA	NA	NA	NA	NA	NA	NA	NA	NA	NA	NA	NA	NA	NA	NA	NA	NA	NA	NA	B-cell_ALL	NA	NA	NA
SUPB8_HAEMATOPOIETIC_AND_LYMPHOID_TISSUE	ACH-002308	NA	NA	NA	NA	NA	NA	NA	NA	NA	NA	NA	NA	NA	NA	NA	NA	NA	NA	NA	NA	NA	NA	NA	NA	NA	NA	NA	B-cell_ALL	NA	NA	NA
U698M_HAEMATOPOIETIC_AND_LYMPHOID_TISSUE	ACH-001680	NA	NA	NA	NA	NA	NA	NA	NA	NA	NA	NA	NA	NA	NA	NA	NA	NA	NA	NA	NA	NA	NA	NA	NA	NA	NA	NA	B-cell_ALL	NA	NA	NA
BC1_HAEMATOPOIETIC_AND_LYMPHOID_TISSUE	ACH-002214	NA	NA	NA	NA	NA	NA	NA	NA	NA	NA	NA	NA	NA	NA	NA	NA	NA	NA	NA	NA	NA	NA	NA	NA	NA	NA	NA	NA	NA	NA	DLBC
CROAP2_HAEMATOPOIETIC_AND_LYMPHOID_TISSUE	ACH-002220	NA	NA	NA	NA	NA	NA	NA	NA	NA	NA	NA	NA	NA	NA	NA	NA	NA	NA	NA	NA	NA	NA	NA	NA	NA	NA	NA	NA	NA	NA	DLBC
CTB1_HAEMATOPOIETIC_AND_LYMPHOID_TISSUE	ACH-002221	NA	NA	NA	NA	NA	NA	NA	NA	NA	NA	NA	NA	NA	NA	NA	NA	NA	NA	NA	NA	NA	NA	NA	NA	NA	NA	NA	NA	NA	NA	DLBC
FARAGE_HAEMATOPOIETIC_AND_LYMPHOID_TISSUE	ACH-001498	NA	NA	NA	NA	NA	NA	NA	NA	NA	NA	NA	NA	NA	NA	NA	NA	NA	NA	NA	NA	NA	NA	NA	NA	NA	NA	NA	NA	NA	NA	DLBC
JSC1_HAEMATOPOIETIC_AND_LYMPHOID_TISSUE	ACH-002253	NA	NA	NA	NA	NA	NA	NA	NA	NA	NA	NA	NA	NA	NA	NA	NA	NA	NA	NA	NA	NA	NA	NA	NA	NA	NA	NA	NA	NA	NA	DLBC
KARPAS1106P_HAEMATOPOIETIC_AND_LYMPHOID_TISSUE	ACH-002254	NA	NA	NA	NA	NA	NA	NA	NA	NA	NA	NA	NA	NA	NA	NA	NA	NA	NA	NA	NA	NA	NA	NA	NA	NA	NA	NA	NA	NA	NA	DLBC
RCK8_HAEMATOPOIETIC_AND_LYMPHOID_TISSUE	ACH-001638	NA	NA	NA	NA	NA	NA	NA	NA	NA	NA	NA	NA	NA	NA	NA	NA	NA	NA	NA	NA	NA	NA	NA	NA	NA	NA	NA	NA	NA	NA	DLBC
SCC3_HAEMATOPOIETIC_AND_LYMPHOID_TISSUE	ACH-001642	NA	NA	NA	NA	NA	NA	NA	NA	NA	NA	NA	NA	NA	NA	NA	NA	NA	NA	NA	NA	NA	NA	NA	NA	NA	NA	NA	NA	NA	NA	DLBC
SLVL_HAEMATOPOIETIC_AND_LYMPHOID_TISSUE	ACH-002062	NA	NA	NA	NA	NA	NA	NA	NA	NA	NA	NA	NA	NA	NA	NA	NA	NA	NA	NA	NA	NA	NA	NA	NA	NA	NA	NA	NA	NA	NA	DLBC
SUDHL16_HAEMATOPOIETIC_AND_LYMPHOID_TISSUE	ACH-002307	NA	NA	NA	NA	NA	NA	NA	NA	NA	NA	NA	NA	NA	NA	NA	NA	NA	NA	NA	NA	NA	NA	NA	NA	NA	NA	NA	NA	NA	NA	DLBC
TK_HAEMATOPOIETIC_AND_LYMPHOID_TISSUE	ACH-002313	NA	NA	NA	NA	NA	NA	NA	NA	NA	NA	NA	NA	NA	NA	NA	NA	NA	NA	NA	NA	NA	NA	NA	NA	NA	NA	NA	NA	NA	NA	DLBC
TUR_HAEMATOPOIETIC_AND_LYMPHOID_TISSUE	ACH-002314	NA	NA	NA	NA	NA	NA	NA	NA	NA	NA	NA	NA	NA	NA	NA	NA	NA	NA	NA	NA	NA	NA	NA	NA	NA	NA	NA	AML	NA	NA	DLBC
VAL_HAEMATOPOIETIC_AND_LYMPHOID_TISSUE	ACH-001703	NA	NA	NA	NA	NA	NA	NA	NA	NA	NA	NA	NA	NA	NA	NA	NA	NA	NA	NA	NA	NA	NA	NA	NA	NA	NA	NA	NA	NA	NA	DLBC
EB3_HAEMATOPOIETIC_AND_LYMPHOID_TISSUE	ACH-002236	NA	NA	NA	NA	NA	NA	NA	NA	NA	NA	NA	NA	NA	NA	NA	NA	NA	NA	NA	NA	NA	NA	NA	NA	NA	NA	NA	lymphoma_Burkitt	NA	NA	NA
JIYOYEP2003_HAEMATOPOIETIC_AND_LYMPHOID_TISSUE	ACH-002252	NA	NA	NA	NA	NA	NA	NA	NA	NA	NA	NA	NA	NA	NA	NA	NA	NA	NA	NA	NA	NA	NA	NA	NA	NA	NA	NA	lymphoma_Burkitt	NA	NA	NA
P32ISH_HAEMATOPOIETIC_AND_LYMPHOID_TISSUE	ACH-002293	NA	NA	NA	NA	NA	NA	NA	NA	NA	NA	NA	NA	NA	NA	NA	NA	NA	NA	NA	NA	NA	NA	NA	NA	NA	NA	NA	lymphoma_Burkitt	NA	NA	NA
RAMOS2G64C10_HAEMATOPOIETIC_AND_LYMPHOID_TISSUE	ACH-002300	NA	NA	NA	NA	NA	NA	NA	NA	NA	NA	NA	NA	NA	NA	NA	NA	NA	NA	NA	NA	NA	NA	NA	NA	NA	NA	NA	lymphoma_Burkitt	NA	NA	NA
RPMI8866_HAEMATOPOIETIC_AND_LYMPHOID_TISSUE	ACH-002302	NA	NA	NA	NA	NA	NA	NA	NA	NA	NA	NA	NA	NA	NA	NA	NA	NA	NA	NA	NA	NA	NA	NA	NA	NA	NA	NA	CML	NA	NA	LCML
MCCAR_HAEMATOPOIETIC_AND_LYMPHOID_TISSUE	ACH-002270	NA	NA	NA	NA	NA	NA	NA	NA	NA	NA	NA	NA	NA	NA	NA	NA	NA	NA	NA	NA	NA	NA	NA	NA	NA	NA	NA	other	NA	NA	MM
HC1_HAEMATOPOIETIC_AND_LYMPHOID_TISSUE	ACH-002242	NA	NA	NA	NA	NA	NA	NA	NA	NA	NA	NA	NA	NA	NA	NA	NA	NA	NA	NA	NA	NA	NA	NA	NA	NA	NA	NA	NA	NA	NA	NA
MLMA_HAEMATOPOIETIC_AND_LYMPHOID_TISSUE	ACH-002274	NA	NA	NA	NA	NA	NA	NA	NA	NA	NA	NA	NA	NA	NA	NA	NA	NA	NA	NA	NA	NA	NA	NA	NA	NA	NA	NA	NA	NA	NA	NA
MOT_HAEMATOPOIETIC_AND_LYMPHOID_TISSUE	ACH-002339	NA	NA	NA	NA	NA	NA	NA	NA	NA	NA	NA	NA	NA	NA	NA	NA	NA	NA	NA	NA	NA	NA	NA	NA	NA	NA	NA	NA	NA	NA	NA
HS445_HAEMATOPOIETIC_AND_LYMPHOID_TISSUE	ACH-002245	NA	NA	NA	NA	NA	NA	NA	NA	NA	NA	NA	NA	NA	NA	NA	NA	NA	NA	NA	NA	NA	NA	NA	NA	NA	NA	NA	other	NA	NA	NA
KY821_HAEMATOPOIETIC_AND_LYMPHOID_TISSUE	ACH-002262	NA	NA	NA	NA	NA	NA	NA	NA	NA	NA	NA	NA	NA	NA	NA	NA	NA	NA	NA	NA	NA	NA	NA	NA	NA	NA	NA	AML	NA	NA	LAML
ALLPO_HAEMATOPOIETIC_AND_LYMPHOID_TISSUE	ACH-002209	NA	NA	NA	NA	NA	NA	NA	NA	NA	NA	NA	NA	NA	NA	NA	NA	NA	NA	NA	NA	NA	NA	NA	NA	NA	NA	NA	NA	NA	NA	ALL
BE13_HAEMATOPOIETIC_AND_LYMPHOID_TISSUE	ACH-002216	NA	NA	NA	NA	NA	NA	NA	NA	NA	NA	NA	NA	NA	NA	NA	NA	NA	NA	NA	NA	NA	NA	NA	NA	NA	NA	NA	NA	NA	NA	ALL
GRST_HAEMATOPOIETIC_AND_LYMPHOID_TISSUE	ACH-002238	NA	NA	NA	NA	NA	NA	NA	NA	NA	NA	NA	NA	NA	NA	NA	NA	NA	NA	NA	NA	NA	NA	NA	NA	NA	NA	NA	NA	NA	NA	ALL
HAL01_HAEMATOPOIETIC_AND_LYMPHOID_TISSUE	ACH-002241	NA	NA	NA	NA	NA	NA	NA	NA	NA	NA	NA	NA	NA	NA	NA	NA	NA	NA	NA	NA	NA	NA	NA	NA	NA	NA	NA	NA	NA	NA	ALL
KARPAS45_HAEMATOPOIETIC_AND_LYMPHOID_TISSUE	ACH-002256	NA	NA	NA	NA	NA	NA	NA	NA	NA	NA	NA	NA	NA	NA	NA	NA	NA	NA	NA	NA	NA	NA	NA	NA	NA	NA	NA	NA	NA	NA	ALL
LC41_HAEMATOPOIETIC_AND_LYMPHOID_TISSUE	ACH-002267	NA	NA	NA	NA	NA	NA	NA	NA	NA	NA	NA	NA	NA	NA	NA	NA	NA	NA	NA	NA	NA	NA	NA	NA	NA	NA	NA	NA	NA	NA	ALL
P30OHK_HAEMATOPOIETIC_AND_LYMPHOID_TISSUE	ACH-002059	NA	NA	NA	NA	NA	NA	NA	NA	NA	NA	NA	NA	NA	NA	NA	NA	NA	NA	NA	NA	NA	NA	NA	NA	NA	NA	NA	NA	NA	NA	ALL
ATN1_HAEMATOPOIETIC_AND_LYMPHOID_TISSUE	ACH-002058	NA	NA	NA	NA	NA	NA	NA	NA	NA	NA	NA	NA	NA	NA	NA	NA	NA	NA	NA	NA	NA	NA	NA	NA	NA	NA	NA	T-cell_ALL	NA	NA	ALL
H9_HAEMATOPOIETIC_AND_LYMPHOID_TISSUE	ACH-002240	NA	NA	NA	NA	NA	NA	NA	NA	NA	NA	NA	NA	NA	NA	NA	NA	NA	NA	NA	NA	NA	NA	NA	NA	NA	NA	NA	NA	NA	NA	NA
WIL2NS_HAEMATOPOIETIC_AND_LYMPHOID_TISSUE	ACH-002316	NA	NA	NA	NA	NA	NA	NA	NA	NA	NA	NA	NA	NA	NA	NA	NA	NA	NA	NA	NA	NA	NA	NA	NA	NA	NA	NA	NA	NA	NA	NA
WSUNHL_HAEMATOPOIETIC_AND_LYMPHOID_TISSUE	ACH-001709	NA	NA	NA	NA	NA	NA	NA	NA	NA	NA	NA	NA	NA	NA	NA	NA	NA	NA	NA	NA	NA	NA	NA	NA	NA	NA	NA	NA	NA	NA	NA
YT_HAEMATOPOIETIC_AND_LYMPHOID_TISSUE	ACH-002317	NA	NA	NA	NA	NA	NA	NA	NA	NA	NA	NA	NA	NA	NA	NA	NA	NA	NA	NA	NA	NA	NA	NA	NA	NA	NA	NA	NA	NA	NA	ALL
ARH77_HAEMATOPOIETIC_AND_LYMPHOID_TISSUE	ACH-002210	NA	NA	NA	NA	NA	NA	NA	NA	NA	NA	NA	NA	NA	NA	NA	NA	NA	NA	NA	NA	NA	NA	NA	NA	NA	NA	NA	other	NA	NA	MM
IM9_HAEMATOPOIETIC_AND_LYMPHOID_TISSUE	ACH-002247	NA	NA	NA	NA	NA	NA	NA	NA	NA	NA	NA	NA	NA	NA	NA	NA	NA	NA	NA	NA	NA	NA	NA	NA	NA	NA	NA	other	NA	NA	MM
CS1_BONE	ACH-002099	NA	NA	NA	NA	NA	NA	NA	NA	NA	NA	NA	NA	NA	NA	NA	NA	NA	NA	NA	NA	NA	NA	NA	NA	NA	NA	NA	chondrosarcoma	NA	NA	NA
CHSA8926_BONE	ACH-002094	NA	NA	NA	NA	NA	NA	NA	NA	NA	NA	NA	NA	NA	NA	NA	NA	NA	NA	NA	NA	NA	NA	NA	NA	NA	NA	NA	chondrosarcoma	NA	NA	NA
ES1_BONE	ACH-002103	NA	NA	NA	NA	NA	NA	NA	NA	NA	NA	NA	NA	NA	NA	NA	NA	NA	NA	NA	NA	NA	NA	NA	NA	NA	NA	NA	Ewings_sarcoma	NA	NA	NA
ES3_BONE	ACH-002104	NA	NA	NA	NA	NA	NA	NA	NA	NA	NA	NA	NA	NA	NA	NA	NA	NA	NA	NA	NA	NA	NA	NA	NA	NA	NA	NA	Ewings_sarcoma	NA	NA	NA
ES4_BONE	ACH-002105	NA	NA	NA	NA	NA	NA	NA	NA	NA	NA	NA	NA	NA	NA	NA	NA	NA	NA	NA	NA	NA	NA	NA	NA	NA	NA	NA	Ewings_sarcoma	NA	NA	NA
ES5_BONE	ACH-002106	NA	NA	NA	NA	NA	NA	NA	NA	NA	NA	NA	NA	NA	NA	NA	NA	NA	NA	NA	NA	NA	NA	NA	NA	NA	NA	NA	Ewings_sarcoma	NA	NA	NA
ES7_BONE	ACH-002108	NA	NA	NA	NA	NA	NA	NA	NA	NA	NA	NA	NA	NA	NA	NA	NA	NA	NA	NA	NA	NA	NA	NA	NA	NA	NA	NA	Ewings_sarcoma	NA	NA	NA
ES8_BONE	ACH-002109	NA	NA	NA	NA	NA	NA	NA	NA	NA	NA	NA	NA	NA	NA	NA	NA	NA	NA	NA	NA	NA	NA	NA	NA	NA	NA	NA	Ewings_sarcoma	NA	NA	NA
EW1_BONE	ACH-002110	NA	NA	NA	NA	NA	NA	NA	NA	NA	NA	NA	NA	NA	NA	NA	NA	NA	NA	NA	NA	NA	NA	NA	NA	NA	NA	NA	Ewings_sarcoma	NA	NA	NA
EW11_BONE	ACH-002111	NA	NA	NA	NA	NA	NA	NA	NA	NA	NA	NA	NA	NA	NA	NA	NA	NA	NA	NA	NA	NA	NA	NA	NA	NA	NA	NA	Ewings_sarcoma	NA	NA	NA
EW12_BONE	ACH-002112	NA	NA	NA	NA	NA	NA	NA	NA	NA	NA	NA	NA	NA	NA	NA	NA	NA	NA	NA	NA	NA	NA	NA	NA	NA	NA	NA	Ewings_sarcoma	NA	NA	NA
EW13_BONE	ACH-002113	NA	NA	NA	NA	NA	NA	NA	NA	NA	NA	NA	NA	NA	NA	NA	NA	NA	NA	NA	NA	NA	NA	NA	NA	NA	NA	NA	Ewings_sarcoma	NA	NA	NA
EW16_BONE	ACH-002114	NA	NA	NA	NA	NA	NA	NA	NA	NA	NA	NA	NA	NA	NA	NA	NA	NA	NA	NA	NA	NA	NA	NA	NA	NA	NA	NA	Ewings_sarcoma	NA	NA	NA
EW18_BONE	ACH-002115	NA	NA	NA	NA	NA	NA	NA	NA	NA	NA	NA	NA	NA	NA	NA	NA	NA	NA	NA	NA	NA	NA	NA	NA	NA	NA	NA	Ewings_sarcoma	NA	NA	NA
EW22_BONE	ACH-002116	NA	NA	NA	NA	NA	NA	NA	NA	NA	NA	NA	NA	NA	NA	NA	NA	NA	NA	NA	NA	NA	NA	NA	NA	NA	NA	NA	Ewings_sarcoma	NA	NA	NA
EW24_BONE	ACH-002117	NA	NA	NA	NA	NA	NA	NA	NA	NA	NA	NA	NA	NA	NA	NA	NA	NA	NA	NA	NA	NA	NA	NA	NA	NA	NA	NA	Ewings_sarcoma	NA	NA	NA
EW3_BONE	ACH-002118	NA	NA	NA	NA	NA	NA	NA	NA	NA	NA	NA	NA	NA	NA	NA	NA	NA	NA	NA	NA	NA	NA	NA	NA	NA	NA	NA	Ewings_sarcoma	NA	NA	NA
EW7_BONE	ACH-002119	NA	NA	NA	NA	NA	NA	NA	NA	NA	NA	NA	NA	NA	NA	NA	NA	NA	NA	NA	NA	NA	NA	NA	NA	NA	NA	NA	Ewings_sarcoma	NA	NA	NA
CAL72_BONE	ACH-001715	NA	NA	NA	NA	NA	NA	NA	NA	NA	NA	NA	NA	NA	NA	NA	NA	NA	NA	NA	NA	NA	NA	NA	NA	NA	NA	NA	osteosarcoma	NA	NA	NA
HUO3N1_BONE	ACH-002142	NA	NA	NA	NA	NA	NA	NA	NA	NA	NA	NA	NA	NA	NA	NA	NA	NA	NA	NA	NA	NA	NA	NA	NA	NA	NA	NA	osteosarcoma	NA	NA	NA
HUO9_BONE	ACH-001526	NA	NA	NA	NA	NA	NA	NA	NA	NA	NA	NA	NA	NA	NA	NA	NA	NA	NA	NA	NA	NA	NA	NA	NA	NA	NA	NA	osteosarcoma	NA	NA	NA
NOS1_BONE	ACH-002067	NA	NA	NA	NA	NA	NA	NA	NA	NA	NA	NA	NA	NA	NA	NA	NA	NA	NA	NA	NA	NA	NA	NA	NA	NA	NA	NA	osteosarcoma	NA	NA	NA
NY_BONE	ACH-002178	NA	NA	NA	NA	NA	NA	NA	NA	NA	NA	NA	NA	NA	NA	NA	NA	NA	NA	NA	NA	NA	NA	NA	NA	NA	NA	NA	osteosarcoma	NA	NA	NA
COLO824_BREAST	ACH-001820	NA	NA	NA	NA	NA	NA	NA	NA	NA	NA	NA	NA	NA	NA	NA	NA	NA	NA	NA	NA	NA	NA	NA	NA	NA	NA	NA	breast	NA	NA	BRCA
MDAMB330_BREAST	ACH-001358	NA	NA	NA	NA	NA	NA	NA	NA	NA	NA	NA	NA	NA	NA	NA	NA	NA	NA	NA	NA	NA	NA	NA	NA	NA	NA	NA	breast	NA	NA	BRCA
MFM223_BREAST	ACH-001819	NA	NA	NA	NA	NA	NA	NA	NA	NA	NA	NA	NA	NA	NA	NA	NA	NA	NA	NA	NA	NA	NA	NA	NA	NA	NA	NA	breast	NA	NA	BRCA
MRKNU1_BREAST	ACH-002163	NA	NA	NA	NA	NA	NA	NA	NA	NA	NA	NA	NA	NA	NA	NA	NA	NA	NA	NA	NA	NA	NA	NA	NA	NA	NA	NA	breast	NA	NA	BRCA
OCUBM_BREAST	ACH-002179	NA	NA	NA	NA	NA	NA	NA	NA	NA	NA	NA	NA	NA	NA	NA	NA	NA	NA	NA	NA	NA	NA	NA	NA	NA	NA	NA	breast	NA	NA	BRCA
EGI1_BILIARY_TRACT	ACH-001494	NA	NA	NA	NA	NA	NA	NA	NA	NA	NA	NA	NA	NA	NA	NA	NA	NA	NA	NA	NA	NA	NA	NA	NA	NA	NA	NA	bile_duct	NA	NA	NA
ETK1_BILIARY_TRACT	ACH-002237	NA	NA	NA	NA	NA	NA	NA	NA	NA	NA	NA	NA	NA	NA	NA	NA	NA	NA	NA	NA	NA	NA	NA	NA	NA	NA	NA	bile_duct	NA	NA	NA
TGBC1TKB_BILIARY_TRACT	ACH-001861	NA	NA	NA	NA	NA	NA	NA	NA	NA	NA	NA	NA	NA	NA	NA	NA	NA	NA	NA	NA	NA	NA	NA	NA	NA	NA	NA	bile_duct	NA	NA	NA
TGBC24TKB_BILIARY_TRACT	ACH-002312	NA	NA	NA	NA	NA	NA	NA	NA	NA	NA	NA	NA	NA	NA	NA	NA	NA	NA	NA	NA	NA	NA	NA	NA	NA	NA	NA	bile_duct	NA	NA	NA
CAR1_LARGE_INTESTINE	ACH-002345	NA	NA	NA	NA	NA	NA	NA	NA	NA	NA	NA	NA	NA	NA	NA	NA	NA	NA	NA	NA	NA	NA	NA	NA	NA	NA	NA	colorectal	NA	NA	COAD/READ
GP5D_LARGE_INTESTINE	ACH-001345	NA	NA	NA	NA	NA	NA	NA	NA	NA	NA	NA	NA	NA	NA	NA	NA	NA	NA	NA	NA	NA	NA	NA	NA	NA	NA	NA	colorectal	NA	NA	COAD/READ
HCC2998_LARGE_INTESTINE	ACH-001081	NA	NA	NA	NA	NA	NA	NA	NA	NA	NA	NA	NA	NA	NA	NA	NA	NA	NA	NA	NA	NA	NA	NA	NA	NA	NA	NA	colorectal	NA	NA	COAD/READ
NCIH630_LARGE_INTESTINE	ACH-002287	NA	NA	NA	NA	NA	NA	NA	NA	NA	NA	NA	NA	NA	NA	NA	NA	NA	NA	NA	NA	NA	NA	NA	NA	NA	NA	NA	colorectal	NA	NA	COAD/READ
GT3TKB_STOMACH	ACH-002122	NA	NA	NA	NA	NA	NA	NA	NA	NA	NA	NA	NA	NA	NA	NA	NA	NA	NA	NA	NA	NA	NA	NA	NA	NA	NA	NA	lung_NSC	NA	NA	STAD
HSC39_STOMACH	ACH-002141	NA	NA	NA	NA	NA	NA	NA	NA	NA	NA	NA	NA	NA	NA	NA	NA	NA	NA	NA	NA	NA	NA	NA	NA	NA	NA	NA	stomach	NA	NA	STAD
MKN28_STOMACH	ACH-002161	NA	NA	NA	NA	NA	NA	NA	NA	NA	NA	NA	NA	NA	NA	NA	NA	NA	NA	NA	NA	NA	NA	NA	NA	NA	NA	NA	stomach	NA	NA	STAD
RF48_STOMACH	ACH-002301	NA	NA	NA	NA	NA	NA	NA	NA	NA	NA	NA	NA	NA	NA	NA	NA	NA	NA	NA	NA	NA	NA	NA	NA	NA	NA	NA	stomach	NA	NA	STAD
SCH_STOMACH	ACH-002198	NA	NA	NA	NA	NA	NA	NA	NA	NA	NA	NA	NA	NA	NA	NA	NA	NA	NA	NA	NA	NA	NA	NA	NA	NA	NA	NA	stomach	NA	NA	STAD
SKGT2_STOMACH	ACH-001653	NA	NA	NA	NA	NA	NA	NA	NA	NA	NA	NA	NA	NA	NA	NA	NA	NA	NA	NA	NA	NA	NA	NA	NA	NA	NA	NA	stomach	NA	NA	STAD
SW13_ADRENAL_CORTEX	ACH-001401	NA	NA	NA	NA	NA	NA	NA	NA	NA	NA	NA	NA	NA	NA	NA	NA	NA	NA	NA	NA	NA	NA	NA	NA	NA	NA	NA	NA	NA	NA	ACC
BB65RCC_KIDNEY	ACH-002090	NA	NA	NA	NA	NA	NA	NA	NA	NA	NA	NA	NA	NA	NA	NA	NA	NA	NA	NA	NA	NA	NA	NA	NA	NA	NA	NA	kidney	NA	NA	KIRC
HA7RCC_KIDNEY	ACH-002139	NA	NA	NA	NA	NA	NA	NA	NA	NA	NA	NA	NA	NA	NA	NA	NA	NA	NA	NA	NA	NA	NA	NA	NA	NA	NA	NA	kidney	NA	NA	KIRC
LB1047RCC_KIDNEY	ACH-002150	NA	NA	NA	NA	NA	NA	NA	NA	NA	NA	NA	NA	NA	NA	NA	NA	NA	NA	NA	NA	NA	NA	NA	NA	NA	NA	NA	kidney	NA	NA	KIRC
LB2241RCC_KIDNEY	ACH-002151	NA	NA	NA	NA	NA	NA	NA	NA	NA	NA	NA	NA	NA	NA	NA	NA	NA	NA	NA	NA	NA	NA	NA	NA	NA	NA	NA	kidney	NA	NA	KIRC
LB996RCC_KIDNEY	ACH-002155	NA	NA	NA	NA	NA	NA	NA	NA	NA	NA	NA	NA	NA	NA	NA	NA	NA	NA	NA	NA	NA	NA	NA	NA	NA	NA	NA	kidney	NA	NA	KIRC
NCC010_KIDNEY	ACH-002167	NA	NA	NA	NA	NA	NA	NA	NA	NA	NA	NA	NA	NA	NA	NA	NA	NA	NA	NA	NA	NA	NA	NA	NA	NA	NA	NA	kidney	NA	NA	KIRC
NCC021_KIDNEY	ACH-002168	NA	NA	NA	NA	NA	NA	NA	NA	NA	NA	NA	NA	NA	NA	NA	NA	NA	NA	NA	NA	NA	NA	NA	NA	NA	NA	NA	kidney	NA	NA	KIRC
RCCAB_KIDNEY	ACH-002187	NA	NA	NA	NA	NA	NA	NA	NA	NA	NA	NA	NA	NA	NA	NA	NA	NA	NA	NA	NA	NA	NA	NA	NA	NA	NA	NA	kidney	NA	NA	KIRC
RCCER_KIDNEY	ACH-002188	NA	NA	NA	NA	NA	NA	NA	NA	NA	NA	NA	NA	NA	NA	NA	NA	NA	NA	NA	NA	NA	NA	NA	NA	NA	NA	NA	kidney	NA	NA	KIRC
RCCFG2_KIDNEY	ACH-002189	NA	NA	NA	NA	NA	NA	NA	NA	NA	NA	NA	NA	NA	NA	NA	NA	NA	NA	NA	NA	NA	NA	NA	NA	NA	NA	NA	kidney	NA	NA	KIRC
RCCJW_KIDNEY	ACH-002191	NA	NA	NA	NA	NA	NA	NA	NA	NA	NA	NA	NA	NA	NA	NA	NA	NA	NA	NA	NA	NA	NA	NA	NA	NA	NA	NA	kidney	NA	NA	KIRC
RCCMF_KIDNEY	ACH-002192	NA	NA	NA	NA	NA	NA	NA	NA	NA	NA	NA	NA	NA	NA	NA	NA	NA	NA	NA	NA	NA	NA	NA	NA	NA	NA	NA	kidney	NA	NA	KIRC
RXF393_KIDNEY	ACH-002195	NA	NA	NA	NA	NA	NA	NA	NA	NA	NA	NA	NA	NA	NA	NA	NA	NA	NA	NA	NA	NA	NA	NA	NA	NA	NA	NA	kidney	NA	NA	KIRC
SN12C_KIDNEY	ACH-002199	NA	NA	NA	NA	NA	NA	NA	NA	NA	NA	NA	NA	NA	NA	NA	NA	NA	NA	NA	NA	NA	NA	NA	NA	NA	NA	NA	kidney	NA	NA	KIRC
201T_LUNG	ACH-002089	NA	NA	NA	NA	NA	NA	NA	NA	NA	NA	NA	NA	NA	NA	NA	NA	NA	NA	NA	NA	NA	NA	NA	NA	NA	NA	NA	lung_NSC	NA	NA	LUAD
EMCBAC1_LUNG	ACH-002101	NA	NA	NA	NA	NA	NA	NA	NA	NA	NA	NA	NA	NA	NA	NA	NA	NA	NA	NA	NA	NA	NA	NA	NA	NA	NA	NA	lung_NSC	NA	NA	LUAD
EMCBAC2_LUNG	ACH-002102	NA	NA	NA	NA	NA	NA	NA	NA	NA	NA	NA	NA	NA	NA	NA	NA	NA	NA	NA	NA	NA	NA	NA	NA	NA	NA	NA	lung_NSC	NA	NA	LUAD
LC2AD_LUNG	ACH-002157	NA	NA	NA	NA	NA	NA	NA	NA	NA	NA	NA	NA	NA	NA	NA	NA	NA	NA	NA	NA	NA	NA	NA	NA	NA	NA	NA	lung_NSC	NA	NA	LUAD
NCIH1993_LUNG	ACH-001137	NA	NA	NA	NA	NA	NA	NA	NA	NA	NA	NA	NA	NA	NA	NA	NA	NA	NA	NA	NA	NA	NA	NA	NA	NA	NA	NA	lung_NSC	NA	NA	LUAD
NCIH720_LUNG	ACH-002174	NA	NA	NA	NA	NA	NA	NA	NA	NA	NA	NA	NA	NA	NA	NA	NA	NA	NA	NA	NA	NA	NA	NA	NA	NA	NA	NA	lung_NSC	NA	NA	NA
NCIH835_LUNG	ACH-002177	NA	NA	NA	NA	NA	NA	NA	NA	NA	NA	NA	NA	NA	NA	NA	NA	NA	NA	NA	NA	NA	NA	NA	NA	NA	NA	NA	lung_NSC	NA	NA	NA
UMC11_LUNG	ACH-001417	NA	NA	NA	NA	NA	NA	NA	NA	NA	NA	NA	NA	NA	NA	NA	NA	NA	NA	NA	NA	NA	NA	NA	NA	NA	NA	NA	lung_NSC	NA	NA	NA
NCIH1770_LUNG	ACH-001362	NA	NA	NA	NA	NA	NA	NA	NA	NA	NA	NA	NA	NA	NA	NA	NA	NA	NA	NA	NA	NA	NA	NA	NA	NA	NA	NA	lung_NSC	NA	NA	UNABLE TO CLASSIFY
NCIH2135_LUNG	ACH-001363	NA	NA	NA	NA	NA	NA	NA	NA	NA	NA	NA	NA	NA	NA	NA	NA	NA	NA	NA	NA	NA	NA	NA	NA	NA	NA	NA	lung_NSC	NA	NA	UNABLE TO CLASSIFY
CORL321_PLEURA	ACH-001490	NA	NA	NA	NA	NA	NA	NA	NA	NA	NA	NA	NA	NA	NA	NA	NA	NA	NA	NA	NA	NA	NA	NA	NA	NA	NA	NA	NA	NA	NA	UNABLE TO CLASSIFY
CORL303_LUNG	ACH-002095	NA	NA	NA	NA	NA	NA	NA	NA	NA	NA	NA	NA	NA	NA	NA	NA	NA	NA	NA	NA	NA	NA	NA	NA	NA	NA	NA	lung_small_cell	NA	NA	SCLC
CORL32_LUNG	ACH-001489	NA	NA	NA	NA	NA	NA	NA	NA	NA	NA	NA	NA	NA	NA	NA	NA	NA	NA	NA	NA	NA	NA	NA	NA	NA	NA	NA	lung_NSC	NA	NA	SCLC
ISTSL1_LUNG	ACH-002144	NA	NA	NA	NA	NA	NA	NA	NA	NA	NA	NA	NA	NA	NA	NA	NA	NA	NA	NA	NA	NA	NA	NA	NA	NA	NA	NA	lung_small_cell	NA	NA	SCLC
ISTSL2_LUNG	ACH-002145	NA	NA	NA	NA	NA	NA	NA	NA	NA	NA	NA	NA	NA	NA	NA	NA	NA	NA	NA	NA	NA	NA	NA	NA	NA	NA	NA	lung_small_cell	NA	NA	SCLC
LB647SCLC_LUNG	ACH-002154	NA	NA	NA	NA	NA	NA	NA	NA	NA	NA	NA	NA	NA	NA	NA	NA	NA	NA	NA	NA	NA	NA	NA	NA	NA	NA	NA	lung_small_cell	NA	NA	SCLC
LU134A_LUNG	ACH-002051	NA	NA	NA	NA	NA	NA	NA	NA	NA	NA	NA	NA	NA	NA	NA	NA	NA	NA	NA	NA	NA	NA	NA	NA	NA	NA	NA	lung_small_cell	NA	NA	SCLC
LU135_LUNG	ACH-001549	NA	NA	NA	NA	NA	NA	NA	NA	NA	NA	NA	NA	NA	NA	NA	NA	NA	NA	NA	NA	NA	NA	NA	NA	NA	NA	NA	lung_small_cell	NA	NA	SCLC
LU139_LUNG	ACH-002052	NA	NA	NA	NA	NA	NA	NA	NA	NA	NA	NA	NA	NA	NA	NA	NA	NA	NA	NA	NA	NA	NA	NA	NA	NA	NA	NA	lung_small_cell	NA	NA	SCLC
LU165_LUNG	ACH-002077	NA	NA	NA	NA	NA	NA	NA	NA	NA	NA	NA	NA	NA	NA	NA	NA	NA	NA	NA	NA	NA	NA	NA	NA	NA	NA	NA	lung_small_cell	NA	NA	SCLC
MS1_LUNG	ACH-001958	NA	NA	NA	NA	NA	NA	NA	NA	NA	NA	NA	NA	NA	NA	NA	NA	NA	NA	NA	NA	NA	NA	NA	NA	NA	NA	NA	lung_small_cell	NA	NA	SCLC
NCIH1417_LUNG	ACH-001591	NA	NA	NA	NA	NA	NA	NA	NA	NA	NA	NA	NA	NA	NA	NA	NA	NA	NA	NA	NA	NA	NA	NA	NA	NA	NA	NA	lung_small_cell	NA	NA	SCLC
NCIH1688_LUNG	ACH-002170	NA	NA	NA	NA	NA	NA	NA	NA	NA	NA	NA	NA	NA	NA	NA	NA	NA	NA	NA	NA	NA	NA	NA	NA	NA	NA	NA	lung_small_cell	NA	NA	SCLC
NCIH250_LUNG	ACH-002171	NA	NA	NA	NA	NA	NA	NA	NA	NA	NA	NA	NA	NA	NA	NA	NA	NA	NA	NA	NA	NA	NA	NA	NA	NA	NA	NA	lung_small_cell	NA	NA	SCLC
NCIH345_LUNG	ACH-001364	NA	NA	NA	NA	NA	NA	NA	NA	NA	NA	NA	NA	NA	NA	NA	NA	NA	NA	NA	NA	NA	NA	NA	NA	NA	NA	NA	lung_small_cell	NA	NA	SCLC
NCIH378_LUNG	ACH-002173	NA	NA	NA	NA	NA	NA	NA	NA	NA	NA	NA	NA	NA	NA	NA	NA	NA	NA	NA	NA	NA	NA	NA	NA	NA	NA	NA	lung_small_cell	NA	NA	SCLC
NCIH64_LUNG	ACH-001599	NA	NA	NA	NA	NA	NA	NA	NA	NA	NA	NA	NA	NA	NA	NA	NA	NA	NA	NA	NA	NA	NA	NA	NA	NA	NA	NA	lung_small_cell	NA	NA	SCLC
NCIH748_LUNG	ACH-002176	NA	NA	NA	NA	NA	NA	NA	NA	NA	NA	NA	NA	NA	NA	NA	NA	NA	NA	NA	NA	NA	NA	NA	NA	NA	NA	NA	lung_small_cell	NA	NA	SCLC
NCIH847_LUNG	ACH-001365	NA	NA	NA	NA	NA	NA	NA	NA	NA	NA	NA	NA	NA	NA	NA	NA	NA	NA	NA	NA	NA	NA	NA	NA	NA	NA	NA	lung_small_cell	NA	NA	SCLC
SBC1_LUNG	ACH-002196	NA	NA	NA	NA	NA	NA	NA	NA	NA	NA	NA	NA	NA	NA	NA	NA	NA	NA	NA	NA	NA	NA	NA	NA	NA	NA	NA	lung_small_cell	NA	NA	SCLC
H2369_PLEURA	ACH-002123	NA	NA	NA	NA	NA	NA	NA	NA	NA	NA	NA	NA	NA	NA	NA	NA	NA	NA	NA	NA	NA	NA	NA	NA	NA	NA	NA	mesothelioma	NA	NA	MESO
NCIH2373_PLEURA	ACH-002124	NA	NA	NA	NA	NA	NA	NA	NA	NA	NA	NA	NA	NA	NA	NA	NA	NA	NA	NA	NA	NA	NA	NA	NA	NA	NA	NA	mesothelioma	NA	NA	MESO
NCIH2461_PLEURA	ACH-002125	NA	NA	NA	NA	NA	NA	NA	NA	NA	NA	NA	NA	NA	NA	NA	NA	NA	NA	NA	NA	NA	NA	NA	NA	NA	NA	NA	mesothelioma	NA	NA	MESO
NCIH2591_PLEURA	ACH-002126	NA	NA	NA	NA	NA	NA	NA	NA	NA	NA	NA	NA	NA	NA	NA	NA	NA	NA	NA	NA	NA	NA	NA	NA	NA	NA	NA	mesothelioma	NA	NA	MESO
NCIH2595_PLEURA	ACH-002127	NA	NA	NA	NA	NA	NA	NA	NA	NA	NA	NA	NA	NA	NA	NA	NA	NA	NA	NA	NA	NA	NA	NA	NA	NA	NA	NA	mesothelioma	NA	NA	MESO
NCIH2722_PLEURA	ACH-002128	NA	NA	NA	NA	NA	NA	NA	NA	NA	NA	NA	NA	NA	NA	NA	NA	NA	NA	NA	NA	NA	NA	NA	NA	NA	NA	NA	mesothelioma	NA	NA	MESO
NCIH2731_PLEURA	ACH-002129	NA	NA	NA	NA	NA	NA	NA	NA	NA	NA	NA	NA	NA	NA	NA	NA	NA	NA	NA	NA	NA	NA	NA	NA	NA	NA	NA	mesothelioma	NA	NA	MESO
NCIH2795_PLEURA	ACH-002130	NA	NA	NA	NA	NA	NA	NA	NA	NA	NA	NA	NA	NA	NA	NA	NA	NA	NA	NA	NA	NA	NA	NA	NA	NA	NA	NA	mesothelioma	NA	NA	MESO
NCIH2803_PLEURA	ACH-002131	NA	NA	NA	NA	NA	NA	NA	NA	NA	NA	NA	NA	NA	NA	NA	NA	NA	NA	NA	NA	NA	NA	NA	NA	NA	NA	NA	mesothelioma	NA	NA	MESO
NCIH2804_PLEURA	ACH-002132	NA	NA	NA	NA	NA	NA	NA	NA	NA	NA	NA	NA	NA	NA	NA	NA	NA	NA	NA	NA	NA	NA	NA	NA	NA	NA	NA	mesothelioma	NA	NA	MESO
NCIH2810_PLEURA	ACH-002133	NA	NA	NA	NA	NA	NA	NA	NA	NA	NA	NA	NA	NA	NA	NA	NA	NA	NA	NA	NA	NA	NA	NA	NA	NA	NA	NA	mesothelioma	NA	NA	MESO
NCIH2818_PLEURA	ACH-002134	NA	NA	NA	NA	NA	NA	NA	NA	NA	NA	NA	NA	NA	NA	NA	NA	NA	NA	NA	NA	NA	NA	NA	NA	NA	NA	NA	mesothelioma	NA	NA	MESO
NCIH2869_PLEURA	ACH-002135	NA	NA	NA	NA	NA	NA	NA	NA	NA	NA	NA	NA	NA	NA	NA	NA	NA	NA	NA	NA	NA	NA	NA	NA	NA	NA	NA	mesothelioma	NA	NA	MESO
H290_PLEURA	ACH-002136	NA	NA	NA	NA	NA	NA	NA	NA	NA	NA	NA	NA	NA	NA	NA	NA	NA	NA	NA	NA	NA	NA	NA	NA	NA	NA	NA	mesothelioma	NA	NA	MESO
D247MG_CENTRAL_NERVOUS_SYSTEM	ACH-002224	NA	NA	NA	NA	NA	NA	NA	NA	NA	NA	NA	NA	NA	NA	NA	NA	NA	NA	NA	NA	NA	NA	NA	NA	NA	NA	NA	glioma	NA	NA	GBM
D263MG_CENTRAL_NERVOUS_SYSTEM	ACH-002225	NA	NA	NA	NA	NA	NA	NA	NA	NA	NA	NA	NA	NA	NA	NA	NA	NA	NA	NA	NA	NA	NA	NA	NA	NA	NA	NA	glioma	NA	NA	GBM
D336MG_CENTRAL_NERVOUS_SYSTEM	ACH-002226	NA	NA	NA	NA	NA	NA	NA	NA	NA	NA	NA	NA	NA	NA	NA	NA	NA	NA	NA	NA	NA	NA	NA	NA	NA	NA	NA	glioma	NA	NA	LGG
D392MG_CENTRAL_NERVOUS_SYSTEM	ACH-002227	NA	NA	NA	NA	NA	NA	NA	NA	NA	NA	NA	NA	NA	NA	NA	NA	NA	NA	NA	NA	NA	NA	NA	NA	NA	NA	NA	glioma	NA	NA	GBM
D502MG_CENTRAL_NERVOUS_SYSTEM	ACH-002229	NA	NA	NA	NA	NA	NA	NA	NA	NA	NA	NA	NA	NA	NA	NA	NA	NA	NA	NA	NA	NA	NA	NA	NA	NA	NA	NA	glioma	NA	NA	LGG
D542MG_CENTRAL_NERVOUS_SYSTEM	ACH-002230	NA	NA	NA	NA	NA	NA	NA	NA	NA	NA	NA	NA	NA	NA	NA	NA	NA	NA	NA	NA	NA	NA	NA	NA	NA	NA	NA	glioma	NA	NA	GBM
D566MG_CENTRAL_NERVOUS_SYSTEM	ACH-002231	NA	NA	NA	NA	NA	NA	NA	NA	NA	NA	NA	NA	NA	NA	NA	NA	NA	NA	NA	NA	NA	NA	NA	NA	NA	NA	NA	glioma	NA	NA	GBM
KNS81FD_CENTRAL_NERVOUS_SYSTEM	ACH-002259	NA	NA	NA	NA	NA	NA	NA	NA	NA	NA	NA	NA	NA	NA	NA	NA	NA	NA	NA	NA	NA	NA	NA	NA	NA	NA	NA	glioma	NA	NA	LGG
LNZTA3WT4_CENTRAL_NERVOUS_SYSTEM	ACH-002269	NA	NA	NA	NA	NA	NA	NA	NA	NA	NA	NA	NA	NA	NA	NA	NA	NA	NA	NA	NA	NA	NA	NA	NA	NA	NA	NA	glioma	NA	NA	GBM
SKMG1_CENTRAL_NERVOUS_SYSTEM	ACH-002304	NA	NA	NA	NA	NA	NA	NA	NA	NA	NA	NA	NA	NA	NA	NA	NA	NA	NA	NA	NA	NA	NA	NA	NA	NA	NA	NA	glioma	NA	NA	GBM
PFSK1_CENTRAL_NERVOUS_SYSTEM	ACH-001711	NA	NA	NA	NA	NA	NA	NA	NA	NA	NA	NA	NA	NA	NA	NA	NA	NA	NA	NA	NA	NA	NA	NA	NA	NA	NA	NA	medulloblastoma	NA	NA	MB
BE2M17_AUTONOMIC_GANGLIA	ACH-002217	NA	NA	NA	NA	NA	NA	NA	NA	NA	NA	NA	NA	NA	NA	NA	NA	NA	NA	NA	NA	NA	NA	NA	NA	NA	NA	NA	neuroblastoma	NA	NA	NB
CHP134_AUTONOMIC_GANGLIA	ACH-001338	NA	NA	NA	NA	NA	NA	NA	NA	NA	NA	NA	NA	NA	NA	NA	NA	NA	NA	NA	NA	NA	NA	NA	NA	NA	NA	NA	neuroblastoma	NA	NA	NB
GIMEN_AUTONOMIC_GANGLIA	ACH-001344	NA	NA	NA	NA	NA	NA	NA	NA	NA	NA	NA	NA	NA	NA	NA	NA	NA	NA	NA	NA	NA	NA	NA	NA	NA	NA	NA	neuroblastoma	NA	NA	NB
GOTO_AUTONOMIC_GANGLIA	ACH-001716	NA	NA	NA	NA	NA	NA	NA	NA	NA	NA	NA	NA	NA	NA	NA	NA	NA	NA	NA	NA	NA	NA	NA	NA	NA	NA	NA	neuroblastoma	NA	NA	NB
IMR5_AUTONOMIC_GANGLIA	ACH-002248	NA	NA	NA	NA	NA	NA	NA	NA	NA	NA	NA	NA	NA	NA	NA	NA	NA	NA	NA	NA	NA	NA	NA	NA	NA	NA	NA	neuroblastoma	NA	NA	NB
LAN6_AUTONOMIC_GANGLIA	ACH-001355	NA	NA	NA	NA	NA	NA	NA	NA	NA	NA	NA	NA	NA	NA	NA	NA	NA	NA	NA	NA	NA	NA	NA	NA	NA	NA	NA	neuroblastoma	NA	NA	NB
NBTU110_AUTONOMIC_GANGLIA	ACH-002277	NA	NA	NA	NA	NA	NA	NA	NA	NA	NA	NA	NA	NA	NA	NA	NA	NA	NA	NA	NA	NA	NA	NA	NA	NA	NA	NA	neuroblastoma	NA	NA	NB
NB10_AUTONOMIC_GANGLIA	ACH-002278	NA	NA	NA	NA	NA	NA	NA	NA	NA	NA	NA	NA	NA	NA	NA	NA	NA	NA	NA	NA	NA	NA	NA	NA	NA	NA	NA	neuroblastoma	NA	NA	NB
NB12_AUTONOMIC_GANGLIA	ACH-002279	NA	NA	NA	NA	NA	NA	NA	NA	NA	NA	NA	NA	NA	NA	NA	NA	NA	NA	NA	NA	NA	NA	NA	NA	NA	NA	NA	neuroblastoma	NA	NA	NB
NB13_AUTONOMIC_GANGLIA	ACH-002280	NA	NA	NA	NA	NA	NA	NA	NA	NA	NA	NA	NA	NA	NA	NA	NA	NA	NA	NA	NA	NA	NA	NA	NA	NA	NA	NA	neuroblastoma	NA	NA	NB
NB14_AUTONOMIC_GANGLIA	ACH-002281	NA	NA	NA	NA	NA	NA	NA	NA	NA	NA	NA	NA	NA	NA	NA	NA	NA	NA	NA	NA	NA	NA	NA	NA	NA	NA	NA	neuroblastoma	NA	NA	NB
NB17_AUTONOMIC_GANGLIA	ACH-002282	NA	NA	NA	NA	NA	NA	NA	NA	NA	NA	NA	NA	NA	NA	NA	NA	NA	NA	NA	NA	NA	NA	NA	NA	NA	NA	NA	neuroblastoma	NA	NA	NB
NB5_AUTONOMIC_GANGLIA	ACH-002283	NA	NA	NA	NA	NA	NA	NA	NA	NA	NA	NA	NA	NA	NA	NA	NA	NA	NA	NA	NA	NA	NA	NA	NA	NA	NA	NA	neuroblastoma	NA	NA	NB
NB6_AUTONOMIC_GANGLIA	ACH-002284	NA	NA	NA	NA	NA	NA	NA	NA	NA	NA	NA	NA	NA	NA	NA	NA	NA	NA	NA	NA	NA	NA	NA	NA	NA	NA	NA	neuroblastoma	NA	NA	NB
NB69_AUTONOMIC_GANGLIA	ACH-002083	NA	NA	NA	NA	NA	NA	NA	NA	NA	NA	NA	NA	NA	NA	NA	NA	NA	NA	NA	NA	NA	NA	NA	NA	NA	NA	NA	neuroblastoma	NA	NA	NB
NB7_AUTONOMIC_GANGLIA	ACH-002285	NA	NA	NA	NA	NA	NA	NA	NA	NA	NA	NA	NA	NA	NA	NA	NA	NA	NA	NA	NA	NA	NA	NA	NA	NA	NA	NA	neuroblastoma	NA	NA	NB
NH12_AUTONOMIC_GANGLIA	ACH-001603	NA	NA	NA	NA	NA	NA	NA	NA	NA	NA	NA	NA	NA	NA	NA	NA	NA	NA	NA	NA	NA	NA	NA	NA	NA	NA	NA	neuroblastoma	NA	NA	NB
TGW_AUTONOMIC_GANGLIA	ACH-001674	NA	NA	NA	NA	NA	NA	NA	NA	NA	NA	NA	NA	NA	NA	NA	NA	NA	NA	NA	NA	NA	NA	NA	NA	NA	NA	NA	neuroblastoma	NA	NA	NB
MZ1PC_PANCREAS	ACH-002164	NA	NA	NA	NA	NA	NA	NA	NA	NA	NA	NA	NA	NA	NA	NA	NA	NA	NA	NA	NA	NA	NA	NA	NA	NA	NA	NA	pancreas	NA	NA	PAAD
PL18_PANCREAS	ACH-002185	NA	NA	NA	NA	NA	NA	NA	NA	NA	NA	NA	NA	NA	NA	NA	NA	NA	NA	NA	NA	NA	NA	NA	NA	NA	NA	NA	pancreas	NA	NA	PAAD
PL4_PANCREAS	ACH-002186	NA	NA	NA	NA	NA	NA	NA	NA	NA	NA	NA	NA	NA	NA	NA	NA	NA	NA	NA	NA	NA	NA	NA	NA	NA	NA	NA	pancreas	NA	NA	PAAD
CP50MELB_SKIN	ACH-002096	NA	NA	NA	NA	NA	NA	NA	NA	NA	NA	NA	NA	NA	NA	NA	NA	NA	NA	NA	NA	NA	NA	NA	NA	NA	NA	NA	melanoma	NA	NA	SKCM
CP66MEL_SKIN	ACH-002097	NA	NA	NA	NA	NA	NA	NA	NA	NA	NA	NA	NA	NA	NA	NA	NA	NA	NA	NA	NA	NA	NA	NA	NA	NA	NA	NA	melanoma	NA	NA	SKCM
GAK_SKIN	ACH-002120	NA	NA	NA	NA	NA	NA	NA	NA	NA	NA	NA	NA	NA	NA	NA	NA	NA	NA	NA	NA	NA	NA	NA	NA	NA	NA	NA	melanoma	NA	NA	SKCM
GMEL_SKIN	ACH-002121	NA	NA	NA	NA	NA	NA	NA	NA	NA	NA	NA	NA	NA	NA	NA	NA	NA	NA	NA	NA	NA	NA	NA	NA	NA	NA	NA	melanoma	NA	NA	SKCM
HMVII_SKIN	ACH-002040	NA	NA	NA	NA	NA	NA	NA	NA	NA	NA	NA	NA	NA	NA	NA	NA	NA	NA	NA	NA	NA	NA	NA	NA	NA	NA	NA	melanoma	NA	NA	SKCM
ISTMEL1_SKIN	ACH-002143	NA	NA	NA	NA	NA	NA	NA	NA	NA	NA	NA	NA	NA	NA	NA	NA	NA	NA	NA	NA	NA	NA	NA	NA	NA	NA	NA	melanoma	NA	NA	SKCM
LB2518MEL_SKIN	ACH-002152	NA	NA	NA	NA	NA	NA	NA	NA	NA	NA	NA	NA	NA	NA	NA	NA	NA	NA	NA	NA	NA	NA	NA	NA	NA	NA	NA	melanoma	NA	NA	SKCM
LB373MELD_SKIN	ACH-002153	NA	NA	NA	NA	NA	NA	NA	NA	NA	NA	NA	NA	NA	NA	NA	NA	NA	NA	NA	NA	NA	NA	NA	NA	NA	NA	NA	melanoma	NA	NA	SKCM
MMACSF_SKIN	ACH-002162	NA	NA	NA	NA	NA	NA	NA	NA	NA	NA	NA	NA	NA	NA	NA	NA	NA	NA	NA	NA	NA	NA	NA	NA	NA	NA	NA	melanoma	NA	NA	SKCM
MZ2MEL_SKIN	ACH-002165	NA	NA	NA	NA	NA	NA	NA	NA	NA	NA	NA	NA	NA	NA	NA	NA	NA	NA	NA	NA	NA	NA	NA	NA	NA	NA	NA	melanoma	NA	NA	SKCM
MZ7MEL_SKIN	ACH-002166	NA	NA	NA	NA	NA	NA	NA	NA	NA	NA	NA	NA	NA	NA	NA	NA	NA	NA	NA	NA	NA	NA	NA	NA	NA	NA	NA	melanoma	NA	NA	SKCM
WM1552C_SKIN	ACH-002205	NA	NA	NA	NA	NA	NA	NA	NA	NA	NA	NA	NA	NA	NA	NA	NA	NA	NA	NA	NA	NA	NA	NA	NA	NA	NA	NA	melanoma	NA	NA	SKCM
WM278_SKIN	ACH-002206	NA	NA	NA	NA	NA	NA	NA	NA	NA	NA	NA	NA	NA	NA	NA	NA	NA	NA	NA	NA	NA	NA	NA	NA	NA	NA	NA	melanoma	NA	NA	SKCM
WM35_SKIN	ACH-002207	NA	NA	NA	NA	NA	NA	NA	NA	NA	NA	NA	NA	NA	NA	NA	NA	NA	NA	NA	NA	NA	NA	NA	NA	NA	NA	NA	melanoma	NA	NA	SKCM
A388_SKIN	ACH-001442	NA	NA	NA	NA	NA	NA	NA	NA	NA	NA	NA	NA	NA	NA	NA	NA	NA	NA	NA	NA	NA	NA	NA	NA	NA	NA	NA	NA	NA	NA	NA
A431_SKIN	ACH-001328	NA	NA	NA	NA	NA	NA	NA	NA	NA	NA	NA	NA	NA	NA	NA	NA	NA	NA	NA	NA	NA	NA	NA	NA	NA	NA	NA	NA	NA	NA	NA
DJM1_SKIN	ACH-002100	NA	NA	NA	NA	NA	NA	NA	NA	NA	NA	NA	NA	NA	NA	NA	NA	NA	NA	NA	NA	NA	NA	NA	NA	NA	NA	NA	NA	NA	NA	NA
SW684_SOFT_TISSUE	ACH-002309	NA	NA	NA	NA	NA	NA	NA	NA	NA	NA	NA	NA	NA	NA	NA	NA	NA	NA	NA	NA	NA	NA	NA	NA	NA	NA	NA	soft_tissue	NA	NA	NA
RH1_SOFT_TISSUE	ACH-002194	NA	NA	NA	NA	NA	NA	NA	NA	NA	NA	NA	NA	NA	NA	NA	NA	NA	NA	NA	NA	NA	NA	NA	NA	NA	NA	NA	Ewings_sarcoma	NA	NA	NA
MFHINO_SOFT_TISSUE	ACH-002271	NA	NA	NA	NA	NA	NA	NA	NA	NA	NA	NA	NA	NA	NA	NA	NA	NA	NA	NA	NA	NA	NA	NA	NA	NA	NA	NA	NA	NA	NA	NA
SW872_SOFT_TISSUE	ACH-002310	NA	NA	NA	NA	NA	NA	NA	NA	NA	NA	NA	NA	NA	NA	NA	NA	NA	NA	NA	NA	NA	NA	NA	NA	NA	NA	NA	NA	NA	NA	NA
SW982_SOFT_TISSUE	ACH-001274	NA	NA	NA	NA	NA	NA	NA	NA	NA	NA	NA	NA	NA	NA	NA	NA	NA	NA	NA	NA	NA	NA	NA	NA	NA	NA	NA	NA	NA	NA	NA
VAESBJ_SOFT_TISSUE	ACH-001702	NA	NA	NA	NA	NA	NA	NA	NA	NA	NA	NA	NA	NA	NA	NA	NA	NA	NA	NA	NA	NA	NA	NA	NA	NA	NA	NA	NA	NA	NA	NA
ASH3_THYROID	ACH-001443	NA	NA	NA	NA	NA	NA	NA	NA	NA	NA	NA	NA	NA	NA	NA	NA	NA	NA	NA	NA	NA	NA	NA	NA	NA	NA	NA	thyroid	NA	NA	THCA
IHH4_THYROID	ACH-001528	NA	NA	NA	NA	NA	NA	NA	NA	NA	NA	NA	NA	NA	NA	NA	NA	NA	NA	NA	NA	NA	NA	NA	NA	NA	NA	NA	thyroid	NA	NA	THCA
K5_THYROID	ACH-002148	NA	NA	NA	NA	NA	NA	NA	NA	NA	NA	NA	NA	NA	NA	NA	NA	NA	NA	NA	NA	NA	NA	NA	NA	NA	NA	NA	thyroid	NA	NA	THCA
RO82W1_THYROID	ACH-001384	NA	NA	NA	NA	NA	NA	NA	NA	NA	NA	NA	NA	NA	NA	NA	NA	NA	NA	NA	NA	NA	NA	NA	NA	NA	NA	NA	thyroid	NA	NA	THCA
DSH1_URINARY_TRACT	ACH-002235	NA	NA	NA	NA	NA	NA	NA	NA	NA	NA	NA	NA	NA	NA	NA	NA	NA	NA	NA	NA	NA	NA	NA	NA	NA	NA	NA	urinary_tract	NA	NA	BLCA
LB831BLC_URINARY_TRACT	ACH-002266	NA	NA	NA	NA	NA	NA	NA	NA	NA	NA	NA	NA	NA	NA	NA	NA	NA	NA	NA	NA	NA	NA	NA	NA	NA	NA	NA	urinary_tract	NA	NA	BLCA
C33A_CERVIX	ACH-001333	NA	NA	NA	NA	NA	NA	NA	NA	NA	NA	NA	NA	NA	NA	NA	NA	NA	NA	NA	NA	NA	NA	NA	NA	NA	NA	NA	cervix	NA	NA	CESC
C4I_CERVIX	ACH-001334	NA	NA	NA	NA	NA	NA	NA	NA	NA	NA	NA	NA	NA	NA	NA	NA	NA	NA	NA	NA	NA	NA	NA	NA	NA	NA	NA	cervix	NA	NA	CESC
CAL39_VULVA	ACH-002091	NA	NA	NA	NA	NA	NA	NA	NA	NA	NA	NA	NA	NA	NA	NA	NA	NA	NA	NA	NA	NA	NA	NA	NA	NA	NA	NA	NA	NA	NA	CESC
CASKI_CERVIX	ACH-001336	NA	NA	NA	NA	NA	NA	NA	NA	NA	NA	NA	NA	NA	NA	NA	NA	NA	NA	NA	NA	NA	NA	NA	NA	NA	NA	NA	cervix	NA	NA	CESC
DOTC24510_CERVIX	ACH-001341	NA	NA	NA	NA	NA	NA	NA	NA	NA	NA	NA	NA	NA	NA	NA	NA	NA	NA	NA	NA	NA	NA	NA	NA	NA	NA	NA	cervix	NA	NA	CESC
HT3_CERVIX	ACH-001525	NA	NA	NA	NA	NA	NA	NA	NA	NA	NA	NA	NA	NA	NA	NA	NA	NA	NA	NA	NA	NA	NA	NA	NA	NA	NA	NA	cervix	NA	NA	CESC
ME180_CERVIX	ACH-001359	NA	NA	NA	NA	NA	NA	NA	NA	NA	NA	NA	NA	NA	NA	NA	NA	NA	NA	NA	NA	NA	NA	NA	NA	NA	NA	NA	cervix	NA	NA	CESC
MS751_CERVIX	ACH-001360	NA	NA	NA	NA	NA	NA	NA	NA	NA	NA	NA	NA	NA	NA	NA	NA	NA	NA	NA	NA	NA	NA	NA	NA	NA	NA	NA	cervix	NA	NA	CESC
SISO_CERVIX	ACH-001650	NA	NA	NA	NA	NA	NA	NA	NA	NA	NA	NA	NA	NA	NA	NA	NA	NA	NA	NA	NA	NA	NA	NA	NA	NA	NA	NA	cervix	NA	NA	CESC
SKGIIIA_CERVIX	ACH-002020	NA	NA	NA	NA	NA	NA	NA	NA	NA	NA	NA	NA	NA	NA	NA	NA	NA	NA	NA	NA	NA	NA	NA	NA	NA	NA	NA	cervix	NA	NA	CESC
SW756_CERVIX	ACH-001402	NA	NA	NA	NA	NA	NA	NA	NA	NA	NA	NA	NA	NA	NA	NA	NA	NA	NA	NA	NA	NA	NA	NA	NA	NA	NA	NA	cervix	NA	NA	CESC
TCYIK_CERVIX	ACH-002201	NA	NA	NA	NA	NA	NA	NA	NA	NA	NA	NA	NA	NA	NA	NA	NA	NA	NA	NA	NA	NA	NA	NA	NA	NA	NA	NA	NA	NA	NA	NA
HEC1_ENDOMETRIUM	ACH-001517	NA	NA	NA	NA	NA	NA	NA	NA	NA	NA	NA	NA	NA	NA	NA	NA	NA	NA	NA	NA	NA	NA	NA	NA	NA	NA	NA	endometrium	NA	NA	UCEC
JHOS3_OVARY	ACH-002146	NA	NA	NA	NA	NA	NA	NA	NA	NA	NA	NA	NA	NA	NA	NA	NA	NA	NA	NA	NA	NA	NA	NA	NA	NA	NA	NA	ovary	NA	NA	OV
KGN_OVARY	ACH-002149	NA	NA	NA	NA	NA	NA	NA	NA	NA	NA	NA	NA	NA	NA	NA	NA	NA	NA	NA	NA	NA	NA	NA	NA	NA	NA	NA	ovary	NA	NA	OV
OV17R_OVARY	ACH-001373	NA	NA	NA	NA	NA	NA	NA	NA	NA	NA	NA	NA	NA	NA	NA	NA	NA	NA	NA	NA	NA	NA	NA	NA	NA	NA	NA	ovary	NA	NA	OV
OVCA420_OVARY	ACH-002181	NA	NA	NA	NA	NA	NA	NA	NA	NA	NA	NA	NA	NA	NA	NA	NA	NA	NA	NA	NA	NA	NA	NA	NA	NA	NA	NA	ovary	NA	NA	OV
OVMIU_OVARY	ACH-002183	NA	NA	NA	NA	NA	NA	NA	NA	NA	NA	NA	NA	NA	NA	NA	NA	NA	NA	NA	NA	NA	NA	NA	NA	NA	NA	NA	ovary	NA	NA	OV
PA1_OVARY	ACH-001374	NA	NA	NA	NA	NA	NA	NA	NA	NA	NA	NA	NA	NA	NA	NA	NA	NA	NA	NA	NA	NA	NA	NA	NA	NA	NA	NA	ovary	NA	NA	OV
PEO1_OVARY	ACH-001630	NA	NA	NA	NA	NA	NA	NA	NA	NA	NA	NA	NA	NA	NA	NA	NA	NA	NA	NA	NA	NA	NA	NA	NA	NA	NA	NA	ovary	NA	NA	OV
SW626_LARGE_INTESTINE	ACH-001399	NA	NA	NA	NA	NA	NA	NA	NA	NA	NA	NA	NA	NA	NA	NA	NA	NA	NA	NA	NA	NA	NA	NA	NA	NA	NA	NA	colorectal	NA	NA	COAD/READ
UWB1289_OVARY	ACH-001418	NA	NA	NA	NA	NA	NA	NA	NA	NA	NA	NA	NA	NA	NA	NA	NA	NA	NA	NA	NA	NA	NA	NA	NA	NA	NA	NA	ovary	NA	NA	OV
BPH1_PROSTATE	ACH-001453	NA	NA	NA	NA	NA	NA	NA	NA	NA	NA	NA	NA	NA	NA	NA	NA	NA	NA	NA	NA	NA	NA	NA	NA	NA	NA	NA	prostate	NA	NA	PRAD
PWR1E_PROSTATE	ACH-001383	NA	NA	NA	NA	NA	NA	NA	NA	NA	NA	NA	NA	NA	NA	NA	NA	NA	NA	NA	NA	NA	NA	NA	NA	NA	NA	NA	prostate	NA	NA	PRAD
NCCIT_TESTIS	ACH-001578	NA	NA	NA	NA	NA	NA	NA	NA	NA	NA	NA	NA	NA	NA	NA	NA	NA	NA	NA	NA	NA	NA	NA	NA	NA	NA	NA	NA	NA	NA	NA
NEC8_TESTIS	ACH-002288	NA	NA	NA	NA	NA	NA	NA	NA	NA	NA	NA	NA	NA	NA	NA	NA	NA	NA	NA	NA	NA	NA	NA	NA	NA	NA	NA	NA	NA	NA	NA
NTERA2CLD1_TESTIS	ACH-002291	NA	NA	NA	NA	NA	NA	NA	NA	NA	NA	NA	NA	NA	NA	NA	NA	NA	NA	NA	NA	NA	NA	NA	NA	NA	NA	NA	NA	NA	NA	NA
JAR_PLACENTA	ACH-001529	NA	NA	NA	NA	NA	NA	NA	NA	NA	NA	NA	NA	NA	NA	NA	NA	NA	NA	NA	NA	NA	NA	NA	NA	NA	NA	NA	NA	NA	NA	NA
JEG3_PLACENTA	ACH-001530	NA	NA	NA	NA	NA	NA	NA	NA	NA	NA	NA	NA	NA	NA	NA	NA	NA	NA	NA	NA	NA	NA	NA	NA	NA	NA	NA	NA	NA	NA	NA
SW954_CERVIX	ACH-001400	NA	NA	NA	NA	NA	NA	NA	NA	NA	NA	NA	NA	NA	NA	NA	NA	NA	NA	NA	NA	NA	NA	NA	NA	NA	NA	NA	NA	NA	NA	NA
SW962_VULVA	ACH-002200	NA	NA	NA	NA	NA	NA	NA	NA	NA	NA	NA	NA	NA	NA	NA	NA	NA	NA	NA	NA	NA	NA	NA	NA	NA	NA	NA	NA	NA	NA	NA
SKN_ENDOMETRIUM	ACH-001655	NA	NA	NA	NA	NA	NA	NA	NA	NA	NA	NA	NA	NA	NA	NA	NA	NA	NA	NA	NA	NA	NA	NA	NA	NA	NA	NA	NA	NA	NA	NA
BC3_HAEMATOPOIETIC_AND_LYMPHOID_TISSUE	ACH-002215	NA	NA	NA	NA	NA	NA	NA	NA	NA	NA	NA	NA	NA	NA	NA	NA	NA	NA	NA	NA	NA	NA	NA	NA	NA	NA	NA	NA	NA	NA	DLBC
BONNA12_HAEMATOPOIETIC_AND_LYMPHOID_TISSUE	ACH-001452	NA	NA	NA	NA	NA	NA	NA	NA	NA	NA	NA	NA	NA	NA	NA	NA	NA	NA	NA	NA	NA	NA	NA	NA	NA	NA	NA	NA	NA	NA	NA
ES6_BONE	ACH-002107	NA	NA	NA	NA	NA	NA	NA	NA	NA	NA	NA	NA	NA	NA	NA	NA	NA	NA	NA	NA	NA	NA	NA	NA	NA	NA	NA	Ewings_sarcoma	NA	NA	NA
DIFI_LARGE_INTESTINE	ACH-002233	NA	NA	NA	NA	NA	NA	NA	NA	NA	NA	NA	NA	NA	NA	NA	NA	NA	NA	NA	NA	NA	NA	NA	NA	NA	NA	NA	colorectal	NA	NA	COAD/READ
RCCJF_KIDNEY	ACH-002190	NA	NA	NA	NA	NA	NA	NA	NA	NA	NA	NA	NA	NA	NA	NA	NA	NA	NA	NA	NA	NA	NA	NA	NA	NA	NA	NA	kidney	NA	NA	KIRC
SW156_KIDNEY	ACH-001398	NA	NA	NA	NA	NA	NA	NA	NA	NA	NA	NA	NA	NA	NA	NA	NA	NA	NA	NA	NA	NA	NA	NA	NA	NA	NA	NA	kidney	NA	NA	KIRC
PC3JPC3_LUNG	ACH-002184	NA	NA	NA	NA	NA	NA	NA	NA	NA	NA	NA	NA	NA	NA	NA	NA	NA	NA	NA	NA	NA	NA	NA	NA	NA	NA	NA	lung_NSC	NA	NA	LUAD
NCIH740_LUNG	ACH-002175	NA	NA	NA	NA	NA	NA	NA	NA	NA	NA	NA	NA	NA	NA	NA	NA	NA	NA	NA	NA	NA	NA	NA	NA	NA	NA	NA	lung_small_cell	NA	NA	SCLC
NCIH1304_LUNG	ACH-002169	NA	NA	NA	NA	NA	NA	NA	NA	NA	NA	NA	NA	NA	NA	NA	NA	NA	NA	NA	NA	NA	NA	NA	NA	NA	NA	NA	lung_small_cell	NA	NA	SCLC
D423MG_CENTRAL_NERVOUS_SYSTEM	ACH-002228	NA	NA	NA	NA	NA	NA	NA	NA	NA	NA	NA	NA	NA	NA	NA	NA	NA	NA	NA	NA	NA	NA	NA	NA	NA	NA	NA	glioma	NA	NA	GBM
KPNYS_AUTONOMIC_GANGLIA	ACH-002261	NA	NA	NA	NA	NA	NA	NA	NA	NA	NA	NA	NA	NA	NA	NA	NA	NA	NA	NA	NA	NA	NA	NA	NA	NA	NA	NA	neuroblastoma	NA	NA	NB
MCIXC_AUTONOMIC_GANGLIA	ACH-002160	NA	NA	NA	NA	NA	NA	NA	NA	NA	NA	NA	NA	NA	NA	NA	NA	NA	NA	NA	NA	NA	NA	NA	NA	NA	NA	NA	Ewings_sarcoma	NA	NA	NB
CP67MEL_SKIN	ACH-002098	NA	NA	NA	NA	NA	NA	NA	NA	NA	NA	NA	NA	NA	NA	NA	NA	NA	NA	NA	NA	NA	NA	NA	NA	NA	NA	NA	melanoma	NA	NA	SKCM
HS633T_SOFT_TISSUE	ACH-002246	NA	NA	NA	NA	NA	NA	NA	NA	NA	NA	NA	NA	NA	NA	NA	NA	NA	NA	NA	NA	NA	NA	NA	NA	NA	NA	NA	soft_tissue	NA	NA	NA
OMC1_CERVIX	ACH-002180	NA	NA	NA	NA	NA	NA	NA	NA	NA	NA	NA	NA	NA	NA	NA	NA	NA	NA	NA	NA	NA	NA	NA	NA	NA	NA	NA	cervix	NA	NA	CESC
HEY_OVARY	ACH-002140	NA	NA	NA	NA	NA	NA	NA	NA	NA	NA	NA	NA	NA	NA	NA	NA	NA	NA	NA	NA	NA	NA	NA	NA	NA	NA	NA	ovary	NA	NA	OV
JHU029_UPPER_AERODIGESTIVE_TRACT	ACH-002251	NA	NA	NA	NA	NA	NA	NA	NA	NA	NA	NA	NA	NA	NA	NA	NA	NA	NA	NA	NA	NA	NA	NA	NA	NA	NA	NA	upper_aerodigestive	NA	NA	HNSC
SCC90_UPPER_AERODIGESTIVE_TRACT	ACH-002315	NA	NA	NA	NA	NA	NA	NA	NA	NA	NA	NA	NA	NA	NA	NA	NA	NA	NA	NA	NA	NA	NA	NA	NA	NA	NA	NA	upper_aerodigestive	NA	NA	HNSC
OCILY7_HAEMATOPOIETIC_AND_LYMPHOID_TISSUE	ACH-001617	NA	NA	NA	NA	NA	NA	NA	NA	NA	NA	NA	NA	NA	NA	NA	NA	NA	NA	NA	NA	NA	NA	NA	NA	NA	NA	NA	NA	NA	NA	DLBC
CHSA0011_BONE	ACH-002092	NA	NA	NA	NA	NA	NA	NA	NA	NA	NA	NA	NA	NA	NA	NA	NA	NA	NA	NA	NA	NA	NA	NA	NA	NA	NA	NA	chondrosarcoma	NA	NA	NA
CHSA0108_BONE	ACH-002093	NA	NA	NA	NA	NA	NA	NA	NA	NA	NA	NA	NA	NA	NA	NA	NA	NA	NA	NA	NA	NA	NA	NA	NA	NA	NA	NA	chondrosarcoma	NA	NA	NA
K2_SKIN	ACH-002147	NA	NA	NA	NA	NA	NA	NA	NA	NA	NA	NA	NA	NA	NA	NA	NA	NA	NA	NA	NA	NA	NA	NA	NA	NA	NA	NA	melanoma	NA	NA	SKCM
STS0421_SOFT_TISSUE	ACH-002306	NA	NA	NA	NA	NA	NA	NA	NA	NA	NA	NA	NA	NA	NA	NA	NA	NA	NA	NA	NA	NA	NA	NA	NA	NA	NA	NA	stomach	NA	NA	STAD
MYM12_HAEMATOPOIETIC_AND_LYMPHOID_TISSUE	ACH-002276	NA	NA	NA	NA	NA	NA	NA	NA	NA	NA	NA	NA	NA	NA	NA	NA	NA	NA	NA	NA	NA	NA	NA	NA	NA	NA	NA	NA	NA	NA	ALL
NK92MI_HAEMATOPOIETIC_AND_LYMPHOID_TISSUE	ACH-002289	NA	NA	NA	NA	NA	NA	NA	NA	NA	NA	NA	NA	NA	NA	NA	NA	NA	NA	NA	NA	NA	NA	NA	NA	NA	NA	NA	NA	NA	NA	NA
YMB1E_BREAST	ACH-002208	NA	NA	NA	NA	NA	NA	NA	NA	NA	NA	NA	NA	NA	NA	NA	NA	NA	NA	NA	NA	NA	NA	NA	NA	NA	NA	NA	breast	NA	NA	BRCA
RERFLCFM_LUNG	ACH-002193	NA	NA	NA	NA	NA	NA	NA	NA	NA	NA	NA	NA	NA	NA	NA	NA	NA	NA	NA	NA	NA	NA	NA	NA	NA	NA	NA	lung_small_cell	NA	NA	SCLC
D245MG_CENTRAL_NERVOUS_SYSTEM	ACH-002223	NA	NA	NA	NA	NA	NA	NA	NA	NA	NA	NA	NA	NA	NA	NA	NA	NA	NA	NA	NA	NA	NA	NA	NA	NA	NA	NA	glioma	NA	NA	GBM
VMRCMELG_SKIN	ACH-001704	NA	NA	NA	NA	NA	NA	NA	NA	NA	NA	NA	NA	NA	NA	NA	NA	NA	NA	NA	NA	NA	NA	NA	NA	NA	NA	NA	melanoma	NA	NA	SKCM
OVCA433_OVARY	ACH-002182	NA	NA	NA	NA	NA	NA	NA	NA	NA	NA	NA	NA	NA	NA	NA	NA	NA	NA	NA	NA	NA	NA	NA	NA	NA	NA	NA	ovary	NA	NA	OV
TMK1_STOMACH	ACH-002202	NA	NA	NA	NA	NA	NA	NA	NA	NA	NA	NA	NA	NA	NA	NA	NA	NA	NA	NA	NA	NA	NA	NA	NA	NA	NA	NA	stomach	NA	NA	STAD
SC1_HAEMATOPOIETIC_AND_LYMPHOID_TISSUE	ACH-002392	NA	NA	NA	NA	NA	NA	NA	NA	NA	NA	NA	NA	NA	NA	NA	NA	NA	NA	NA	NA	NA	NA	NA	NA	NA	NA	NA	NA	NA	NA	DLBC
UCH2_BONE	ACH-002204	NA	NA	NA	NA	NA	NA	NA	NA	NA	NA	NA	NA	NA	NA	NA	NA	NA	NA	NA	NA	NA	NA	NA	NA	NA	NA	NA	NA	NA	NA	NA
ML2_HAEMATOPOIETIC_AND_LYMPHOID_TISSUE	ACH-002273	NA	NA	NA	NA	NA	NA	NA	NA	NA	NA	NA	NA	NA	NA	NA	NA	NA	NA	NA	NA	NA	NA	NA	NA	NA	NA	NA	AML	NA	NA	LAML
DG75_HAEMATOPOIETIC_AND_LYMPHOID_TISSUE	ACH-002232	NA	NA	NA	NA	NA	NA	NA	NA	NA	NA	NA	NA	NA	NA	NA	NA	NA	NA	NA	NA	NA	NA	NA	NA	NA	NA	NA	lymphoma_Burkitt	NA	NA	NA
CCRFCEM_HAEMATOPOIETIC_AND_LYMPHOID_TISSUE	ACH-001738	NA	NA	NA	NA	NA	NA	NA	NA	NA	NA	NA	NA	NA	NA	NA	NA	NA	NA	NA	NA	NA	NA	NA	NA	NA	NA	NA	NA	NA	NA	ALL
HEMCSS_BONE	ACH-001519	NA	NA	NA	NA	NA	NA	NA	NA	NA	NA	NA	NA	NA	NA	NA	NA	NA	NA	NA	NA	NA	NA	NA	NA	NA	NA	NA	chondrosarcoma	NA	NA	NA
NCIH187_LUNG	ACH-001136	NA	NA	NA	NA	NA	NA	NA	NA	NA	NA	NA	NA	NA	NA	NA	NA	NA	NA	NA	NA	NA	NA	NA	NA	NA	NA	NA	lung_small_cell	NA	NA	SCLC
SBC3_LUNG	ACH-002197	NA	NA	NA	NA	NA	NA	NA	NA	NA	NA	NA	NA	NA	NA	NA	NA	NA	NA	NA	NA	NA	NA	NA	NA	NA	NA	NA	lung_small_cell	NA	NA	SCLC
NCIH513_PLEURA	ACH-002341	NA	NA	NA	NA	NA	NA	NA	NA	NA	NA	NA	NA	NA	NA	NA	NA	NA	NA	NA	NA	NA	NA	NA	NA	NA	NA	NA	mesothelioma	NA	NA	MESO
KINGS1_CENTRAL_NERVOUS_SYSTEM	ACH-002257	NA	NA	NA	NA	NA	NA	NA	NA	NA	NA	NA	NA	NA	NA	NA	NA	NA	NA	NA	NA	NA	NA	NA	NA	NA	NA	NA	glioma	NA	NA	LGG
LN405_CENTRAL_NERVOUS_SYSTEM	ACH-002268	NA	NA	NA	NA	NA	NA	NA	NA	NA	NA	NA	NA	NA	NA	NA	NA	NA	NA	NA	NA	NA	NA	NA	NA	NA	NA	NA	glioma	NA	NA	GBM
NO10_CENTRAL_NERVOUS_SYSTEM	ACH-001605	NA	NA	NA	NA	NA	NA	NA	NA	NA	NA	NA	NA	NA	NA	NA	NA	NA	NA	NA	NA	NA	NA	NA	NA	NA	NA	NA	glioma	NA	NA	LGG
NO11_CENTRAL_NERVOUS_SYSTEM	ACH-001606	NA	NA	NA	NA	NA	NA	NA	NA	NA	NA	NA	NA	NA	NA	NA	NA	NA	NA	NA	NA	NA	NA	NA	NA	NA	NA	NA	glioma	NA	NA	LGG
451LU_SKIN	ACH-001002	NA	NA	NA	NA	NA	NA	NA	NA	NA	NA	NA	NA	NA	NA	NA	NA	NA	NA	NA	NA	NA	NA	NA	NA	NA	NA	NA	melanoma	NA	NA	SKCM
M14_SKIN	ACH-002159	NA	NA	NA	NA	NA	NA	NA	NA	NA	NA	NA	NA	NA	NA	NA	NA	NA	NA	NA	NA	NA	NA	NA	NA	NA	NA	NA	melanoma	NA	NA	SKCM
HTCC3_THYROID	ACH-001350	NA	NA	NA	NA	NA	NA	NA	NA	NA	NA	NA	NA	NA	NA	NA	NA	NA	NA	NA	NA	NA	NA	NA	NA	NA	NA	NA	thyroid	NA	NA	THCA
HELA_CERVIX	ACH-001086	NA	NA	NA	NA	NA	NA	NA	NA	NA	NA	NA	NA	NA	NA	NA	NA	NA	NA	NA	NA	NA	NA	NA	NA	NA	NA	NA	cervix	NA	NA	CESC
NCIH128_LUNG	ACH-002286	NA	NA	NA	NA	NA	NA	NA	NA	NA	NA	NA	NA	NA	NA	NA	NA	NA	NA	NA	NA	NA	NA	NA	NA	NA	NA	NA	lung_small_cell	NA	NA	SCLC
OMM23_EYE	ACH-002318	NA	NA	NA	NA	NA	NA	NA	NA	NA	NA	NA	NA	NA	NA	NA	NA	NA	NA	NA	NA	NA	NA	NA	NA	NA	NA	NA	NA	NA	NA	NA
OMM25_EYE	NA	NA	NA	NA	NA	NA	NA	NA	NA	NA	NA	NA	NA	NA	NA	NA	NA	NA	NA	NA	NA	NA	NA	NA	NA	NA	NA	NA	NA	NA	NA	NA
SUM52PE_BREAST	ACH-001396	NA	NA	NA	NA	NA	NA	NA	NA	NA	NA	NA	NA	NA	NA	NA	NA	NA	NA	NA	NA	NA	NA	NA	NA	NA	NA	NA	NA	NA	NA	NA
MAVER1_HAEMATOPOIETIC_AND_LYMPHOID_TISSUE	ACH-002485	NA	NA	NA	NA	NA	NA	NA	NA	NA	NA	NA	NA	NA	NA	NA	NA	NA	NA	NA	NA	NA	NA	NA	NA	NA	NA	NA	NA	NA	NA	NA
MEL202_EYE	ACH-001554	NA	NA	NA	NA	NA	NA	NA	NA	NA	NA	NA	NA	NA	NA	NA	NA	NA	NA	NA	NA	NA	NA	NA	NA	NA	NA	NA	NA	NA	NA	NA
Z138_HAEMATOPOIETIC_AND_LYMPHOID_TISSUE	ACH-002500	NA	NA	NA	NA	NA	NA	NA	NA	NA	NA	NA	NA	NA	NA	NA	NA	NA	NA	NA	NA	NA	NA	NA	NA	NA	NA	NA	NA	NA	NA	NA
MEL285_EYE	ACH-002015	NA	NA	NA	NA	NA	NA	NA	NA	NA	NA	NA	NA	NA	NA	NA	NA	NA	NA	NA	NA	NA	NA	NA	NA	NA	NA	NA	NA	NA	NA	NA
WS1_SKIN	NA	NA	NA	NA	NA	NA	NA	NA	NA	NA	NA	NA	NA	NA	NA	NA	NA	NA	NA	NA	NA	NA	NA	NA	NA	NA	NA	NA	NA	NA	NA	NA
T778_SOFT_TISSUE	ACH-001795	NA	NA	NA	NA	NA	NA	NA	NA	NA	NA	NA	NA	NA	NA	NA	NA	NA	NA	NA	NA	NA	NA	NA	NA	NA	NA	NA	NA	NA	NA	NA
KMH2_THYROID	ACH-002397	NA	NA	NA	NA	NA	NA	NA	NA	NA	NA	NA	NA	NA	NA	NA	NA	NA	NA	NA	NA	NA	NA	NA	NA	NA	NA	NA	thyroid	NA	NA	THCA
MC1010_HAEMATOPOIETIC_AND_LYMPHOID_TISSUE	ACH-002390	NA	NA	NA	NA	NA	NA	NA	NA	NA	NA	NA	NA	NA	NA	NA	NA	NA	NA	NA	NA	NA	NA	NA	NA	NA	NA	NA	AML	NA	NA	LAML
LIM1215_LARGE_INTESTINE	ACH-001546	NA	NA	NA	NA	NA	NA	NA	NA	NA	NA	NA	NA	NA	NA	NA	NA	NA	NA	NA	NA	NA	NA	NA	NA	NA	NA	NA	colorectal	NA	NA	COAD/READ
MCC13_SKIN	ACH-001550	NA	NA	NA	NA	NA	NA	NA	NA	NA	NA	NA	NA	NA	NA	NA	NA	NA	NA	NA	NA	NA	NA	NA	NA	NA	NA	NA	NA	NA	NA	NA
TASK1_CENTRAL_NERVOUS_SYSTEM	ACH-001670	NA	NA	NA	NA	NA	NA	NA	NA	NA	NA	NA	NA	NA	NA	NA	NA	NA	NA	NA	NA	NA	NA	NA	NA	NA	NA	NA	NA	NA	NA	NA
UDSCC2_UPPER_AERODIGESTIVE_TRACT	ACH-002391	NA	NA	NA	NA	NA	NA	NA	NA	NA	NA	NA	NA	NA	NA	NA	NA	NA	NA	NA	NA	NA	NA	NA	NA	NA	NA	NA	upper_aerodigestive	NA	NA	HNSC
SARC9371_BONE	ACH-002396	NA	NA	NA	NA	NA	NA	NA	NA	NA	NA	NA	NA	NA	NA	NA	NA	NA	NA	NA	NA	NA	NA	NA	NA	NA	NA	NA	osteosarcoma	NA	NA	NA
MCC26_SKIN	ACH-001552	NA	NA	NA	NA	NA	NA	NA	NA	NA	NA	NA	NA	NA	NA	NA	NA	NA	NA	NA	NA	NA	NA	NA	NA	NA	NA	NA	NA	NA	NA	NA
NBSUSSR_AUTONOMIC_GANGLIA	ACH-002340	NA	NA	NA	NA	NA	NA	NA	NA	NA	NA	NA	NA	NA	NA	NA	NA	NA	NA	NA	NA	NA	NA	NA	NA	NA	NA	NA	neuroblastoma	NA	NA	NB
GEO_LARGE_INTESTINE	ACH-002394	NA	NA	NA	NA	NA	NA	NA	NA	NA	NA	NA	NA	NA	NA	NA	NA	NA	NA	NA	NA	NA	NA	NA	NA	NA	NA	NA	colorectal	NA	NA	COAD/READ
NCIH2330_LUNG	NA	NA	NA	NA	NA	NA	NA	NA	NA	NA	NA	NA	NA	NA	NA	NA	NA	NA	NA	NA	NA	NA	NA	NA	NA	NA	NA	NA	NA	NA	NA	NA
LP6_SOFT_TISSUE	ACH-001116	NA	NA	NA	NA	NA	NA	NA	NA	NA	NA	NA	NA	NA	NA	NA	NA	NA	NA	NA	NA	NA	NA	NA	NA	NA	NA	NA	NA	NA	NA	NA
HS578BST_BREAST	NA	NA	NA	NA	NA	NA	NA	NA	NA	NA	NA	NA	NA	NA	NA	NA	NA	NA	NA	NA	NA	NA	NA	NA	NA	NA	NA	NA	NA	NA	NA	NA
LC1SQ_LUNG	ACH-002156	NA	NA	NA	NA	NA	NA	NA	NA	NA	NA	NA	NA	NA	NA	NA	NA	NA	NA	NA	NA	NA	NA	NA	NA	NA	NA	NA	lung_NSC	NA	NA	LUSC
