# Supplementary material for: Significance of CD8+ T cell infiltration-related biomarkers and the corresponding prediction model for the prognosis of kidney renal clear cell carcinoma
Source: Aging (Albany NY). 2021 Oct 4;13(19):22912–33. doi: 10.18632/aging.203584 (PMC8544304; doi:10.18632/aging.203584)
Supplement: Supplementary Material 2 [file aging-13-203584-s002.xlsx]

## Sheet: Cell line details
Supplementary Material 2. Cell_lines_details.
Sample Name	COSMIC identifier	Whole Exome Sequencing (WES)	Copy Number Alterations (CNA)	Gene Expression	Methylation	Drug Response	GDSC Tissue descriptor 1	GDSC Tissue descriptor 2	Cancer Type (matching TCGA label)	Microsatellite instability Status (MSI)	Screen Medium	Growth Properties
A253	906794	Y	Y	Y	Y	Y	aero_dig_tract	head and neck		MSS/MSI-L	D/F12	Adherent
BB30-HNC	753531	Y	Y	Y	Y	Y	aero_dig_tract	head and neck	HNSC	MSS/MSI-L	D/F12	Adherent
BB49-HNC	753532	Y	Y	Y	Y	Y	aero_dig_tract	head and neck	HNSC	MSS/MSI-L	D/F12	Adherent
BHY	753535	Y	Y	Y	Y	Y	aero_dig_tract	head and neck	HNSC	MSS/MSI-L	D/F12	Adherent
BICR10	1290724	Y	Y	Y	Y	Y	aero_dig_tract	head and neck	HNSC	MSS/MSI-L	D/F12	Adherent
BICR22	1240121	Y	Y	Y	Y	Y	aero_dig_tract	head and neck	HNSC	MSS/MSI-L	D/F12	Adherent
BICR31	1290725	Y	Y	Y	Y	Y	aero_dig_tract	head and neck	HNSC	MSS/MSI-L	D/F12	Adherent
BICR78	1240122	Y	Y	Y	Y	Y	aero_dig_tract	head and neck	HNSC	MSS/MSI-L	D/F12	Adherent
Ca9-22	753538	Y	Y	Y	Y	Y	aero_dig_tract	head and neck	HNSC	MSS/MSI-L	D/F12	Adherent
CAL-27	910916	Y	Y	Y	Y	Y	aero_dig_tract	head and neck	HNSC	MSS/MSI-L	D/F12	Adherent
CAL-33	753541	Y	Y	Y	Y	Y	aero_dig_tract	head and neck	HNSC	MSS/MSI-L	D/F12	Adherent
Detroit562	906837	Y	Y	Y	Y	Y	aero_dig_tract	head and neck	HNSC	MSS/MSI-L	D/F12	Adherent
DOK	910936	Y	Y	Y	Y	Y	aero_dig_tract	head and neck	HNSC	MSS/MSI-L	D/F12	Adherent
FADU	906863	Y	Y	Y	Y	Y	aero_dig_tract	head and neck	HNSC	MSS/MSI-L	D/F12	Adherent
H3118	1240140	Y	Y	Y	Y	Y	aero_dig_tract	head and neck		MSS/MSI-L	R	Adherent
HN	907059	Y	Y	Y	Y	Y	aero_dig_tract	head and neck	HNSC	MSS/MSI-L	D/F12	Adherent
HO-1-N-1	924111	Y	Y	Y	Y	Y	aero_dig_tract	head and neck	HNSC	MSS/MSI-L	D/F12	Adherent
HO-1-u-1	753561	Y	Y	Y	Y	Y	aero_dig_tract	head and neck	HNSC	MSS/MSI-L	D/F12	Adherent
HSC-2	753562	Y	Y	Y	Y	Y	aero_dig_tract	head and neck	HNSC	MSS/MSI-L	D/F12	Adherent
HSC-3	907061	Y	Y	Y	Y	Y	aero_dig_tract	head and neck	HNSC	MSS/MSI-L	D/F12	Adherent
HSC-4	907062	Y	Y	Y	Y	Y	aero_dig_tract	head and neck	HNSC	MSS/MSI-L	D/F12	Adherent
JHU-011	1240161	Y	Y	Y	Y	Y	aero_dig_tract	head and neck	HNSC	MSS/MSI-L	R	Adherent
JHU-022	1240162	Y	Y	Y	Y	Y	aero_dig_tract	head and neck	HNSC	MSS/MSI-L	R	Adherent
KON	1298215	Y	Y	Y	Y	Y	aero_dig_tract	head and neck	HNSC	MSS/MSI-L	D/F12	Adherent
KOSC-2	753570	Y	Y	Y	Y	Y	aero_dig_tract	head and neck	HNSC	MSS/MSI-L	R	Adherent
LB771-HNC	753583	Y	Y	Y	Y	Y	aero_dig_tract	head and neck	HNSC	MSS/MSI-L	D/F12	Adherent
OSC-19	1298362	Y	Y	Y	Y	Y	aero_dig_tract	head and neck	HNSC	MSS/MSI-L	D/F12	Adherent
OSC-20	1240196	Y	Y	Y	Y	Y	aero_dig_tract	head and neck	HNSC	MSS/MSI-L	D/F12	Adherent
PCI-15A	1240204	Y	Y	Y	Y	Y	aero_dig_tract	head and neck	HNSC	MSS/MSI-L	R	Adherent
PCI-30	1298529	Y	Y	Y	Y	Y	aero_dig_tract	head and neck	HNSC	MSS/MSI-L	R	Adherent
PCI-38	1240205	Y	Y	Y	Y	Y	aero_dig_tract	head and neck	HNSC	MSS/MSI-L	R	Adherent
PCI-4B	1298531	Y	Y	Y	Y	Y	aero_dig_tract	head and neck	HNSC	MSS/MSI-L	R	Adherent
PCI-6A	1240206	Y	Y	Y	Y	Y	aero_dig_tract	head and neck	HNSC	MSS/MSI-L	R	Adherent
PE/CA-PJ15	1240207	Y	Y	Y	Y	Y	aero_dig_tract	head and neck	HNSC	MSS/MSI-L	D/F12	Adherent
RPMI-2650	909700	Y	Y	Y	Y	Y	aero_dig_tract	head and neck	HNSC	MSS/MSI-L	D/F12	Adherent
SAS	909708	Y	Y	Y	Y	Y	aero_dig_tract	head and neck	HNSC	MSS/MSI-L	D/F12	Adherent
SAT	1299050	Y	Y	Y	Y	Y	aero_dig_tract	head and neck	HNSC	MSS/MSI-L	R	Adherent
SCC-15	910911	Y	Y	Y	Y	Y	aero_dig_tract	head and neck	HNSC	MSS/MSI-L	D/F12	Adherent
SCC-25	910701	Y	Y	Y	Y	Y	aero_dig_tract	head and neck	HNSC	MSS/MSI-L	D/F12	Adherent
SCC-4	910904	Y	Y	Y	Y	Y	aero_dig_tract	head and neck	HNSC	MSS/MSI-L	D/F12	Adherent
SCC-9	909709	Y	Y	Y	Y	Y	aero_dig_tract	head and neck	HNSC	MSS/MSI-L	D/F12	Adherent
SKN-3	1299059	Y	Y	Y	Y	Y	aero_dig_tract	head and neck	HNSC	MSS/MSI-L	R	Adherent
COLO-680N	906817	Y	Y	Y	Y	Y	aero_dig_tract	oesophagus	ESCA	MSS/MSI-L	R	Adherent
EC-GI-10	753555	Y	Y	Y	Y	Y	aero_dig_tract	oesophagus	ESCA	MSS/MSI-L	D/F12	Adherent
ESO26	1503366	Y	Y	Y	Y	Y	aero_dig_tract	oesophagus	ESCA	MSS/MSI-L	R	Adherent
ESO51	1503367	Y	Y	Y	Y	Y	aero_dig_tract	oesophagus	ESCA	MSS/MSI-L	R	Semi-Adherent
FLO-1	1503361	Y	Y	Y	Y	Y	aero_dig_tract	oesophagus	ESCA	MSS/MSI-L	R	Adherent
HCE-4	753559	Y	Y	Y	Y	Y	aero_dig_tract	oesophagus	ESCA	MSS/MSI-L	D/F12	Adherent
KYAE-1	1503368	Y	Y	Y	Y	Y	aero_dig_tract	oesophagus	ESCA	MSS/MSI-L	R	Suspension
KYSE-140	753573	Y	Y	Y	Y	Y	aero_dig_tract	oesophagus	ESCA	MSS/MSI-L	R	Adherent
KYSE-150	907317	Y	Y	Y	Y	Y	aero_dig_tract	oesophagus	ESCA	MSS/MSI-L	R	Adherent
KYSE-180	907318	Y	Y	Y	Y	Y	aero_dig_tract	oesophagus	ESCA	MSS/MSI-L	R	Adherent
KYSE-220	1240167	Y	Y	Y	Y	Y	aero_dig_tract	oesophagus	ESCA	MSS/MSI-L	R	Adherent
KYSE-270	907319	Y	Y	Y	Y	Y	aero_dig_tract	oesophagus	ESCA	MSS/MSI-L	R	Adherent
KYSE-410	753574	Y	Y	Y	Y	Y	aero_dig_tract	oesophagus	ESCA	MSS/MSI-L	R	Adherent
KYSE-450	907320	Y	Y	Y	Y	Y	aero_dig_tract	oesophagus	ESCA	MSS/MSI-L	R	Adherent
KYSE-50	1298222	Y	Y	Y	Y	Y	aero_dig_tract	oesophagus	ESCA	MSS/MSI-L	D/F12	Adherent
KYSE-510	907321	Y	Y	Y	Y	Y	aero_dig_tract	oesophagus	ESCA	MSS/MSI-L	R	Adherent
KYSE-520	753575	Y	Y	Y	Y	Y	aero_dig_tract	oesophagus	ESCA	MSS/MSI-L	R	Adherent
KYSE-70	753576	Y	Y	Y	Y	Y	aero_dig_tract	oesophagus	ESCA	MSS/MSI-L	R	Adherent
OACM5-1	1503363	Y	Y	Y	Y	Y	aero_dig_tract	oesophagus	ESCA	MSS/MSI-L	R	Semi-Adherent
OACp4C	1503362	Y	Y	Y	Y	Y	aero_dig_tract	oesophagus	ESCA	MSS/MSI-L	R	Adherent
OE19	910079	Y	Y	Y	Y	Y	aero_dig_tract	oesophagus	ESCA	MSS/MSI-L	R	Adherent
OE21	1298359	Y	Y	Y	Y	Y	aero_dig_tract	oesophagus	ESCA	MSS/MSI-L	R	Adherent
OE33	910549	Y	Y	Y	Y	Y	aero_dig_tract	oesophagus	ESCA	MSS/MSI-L	R	Adherent
SK-GT-4	1503365	Y	Y	Y	Y	Y	aero_dig_tract	oesophagus	ESCA	MSS/MSI-L	R	Adherent
TE-1	753621	Y	Y	Y	Y	Y	aero_dig_tract	oesophagus	ESCA	MSS/MSI-L	D/F12	Adherent
TE-10	753622	Y	Y	Y	Y	Y	aero_dig_tract	oesophagus	ESCA	MSS/MSI-L	D/F12	Adherent
TE-11	946354	Y	Y	Y	Y	Y	aero_dig_tract	oesophagus	ESCA	MSS/MSI-L	D/F12	Adherent
TE-12	946356	Y	Y	Y	Y	Y	aero_dig_tract	oesophagus	ESCA	MSS/MSI-L	D/F12	Suspension
TE-15	753614	Y	Y	Y	Y	Y	aero_dig_tract	oesophagus	ESCA	MSS/MSI-L	D/F12	Suspension
TE-4	1503371	Y	Y	Y	Y	Y	aero_dig_tract	oesophagus	ESCA	MSS/MSI-L	R	Adherent
TE-5	735784	Y	Y	Y	Y	Y	aero_dig_tract	oesophagus	ESCA	MSS/MSI-L	D/F12	Adherent
TE-6	946355	Y	Y	Y	Y	Y	aero_dig_tract	oesophagus	ESCA	MSS/MSI-L	D/F12	Adherent
TE-8	753623	Y	Y	Y	Y	Y	aero_dig_tract	oesophagus	ESCA	MSS/MSI-L	D/F12	Adherent
TE-9	946353	Y	Y	Y	Y	Y	aero_dig_tract	oesophagus	ESCA	MSS/MSI-L	D/F12	Adherent
T-T	1299064	Y	Y	Y	Y	Y	aero_dig_tract	oesophagus	ESCA	MSS/MSI-L	D/F12	Adherent
CESS	910688	Y	Y	Y	Y	Y	leukemia	acute_myeloid_leukaemia	LAML	MSS/MSI-L	R	Suspension
CTV-1	753548	Y	Y	Y	Y	Y	leukemia	acute_myeloid_leukaemia	LAML	MSI-H	R	Suspension
GDM-1	906870	Y	Y	Y	Y	Y	leukemia	acute_myeloid_leukaemia	LAML	MSS/MSI-L	R	Suspension
HEL	907053	Y	Y	Y	Y	Y	leukemia	acute_myeloid_leukaemia	LAML	MSS/MSI-L	R	Semi-Adherent
HL-60	905938	Y	Y	Y	Y	Y	leukemia	acute_myeloid_leukaemia	LAML	MSS/MSI-L	D/F12	Suspension
KASUMI-1	907275	Y	Y	Y	Y	Y	leukemia	acute_myeloid_leukaemia	LAML	MSS/MSI-L	R	Suspension
KG-1	907278	Y	Y	Y	Y	Y	leukemia	acute_myeloid_leukaemia	LAML	MSS/MSI-L	D/F12	Suspension
KMOE-2	907280	Y	Y	Y	Y	Y	leukemia	acute_myeloid_leukaemia	LAML	MSS/MSI-L	R	Suspension
ME-1	1330942	Y	Y	Y	Y	Y	leukemia	acute_myeloid_leukaemia	LAML	MSS/MSI-L	R	Suspension
ML-2	908141	Y	Y	Y	Y	Y	leukemia	acute_myeloid_leukaemia	LAML	MSS/MSI-L	R	Suspension
MOLM-13	1330947	Y	Y	Y	Y	Y	leukemia	acute_myeloid_leukaemia	LAML	MSS/MSI-L	R	Suspension
MONO-MAC-6	908148	Y	Y	Y	Y	Y	leukemia	acute_myeloid_leukaemia	LAML	MSS/MSI-L	R	Suspension
NKM-1	908448	Y	Y	Y	Y	Y	leukemia	acute_myeloid_leukaemia	LAML	MSS/MSI-L	R	Suspension
NOMO-1	908451	Y	Y	Y	Y	Y	leukemia	acute_myeloid_leukaemia	LAML	MSS/MSI-L	R	Suspension
OCI-AML2	910947	Y	Y	Y	Y	Y	leukemia	acute_myeloid_leukaemia	LAML	MSS/MSI-L	D/F12	Suspension
OCI-AML3	1290455	Y	Y	Y	Y	Y	leukemia	acute_myeloid_leukaemia	LAML	MSS/MSI-L	R	Suspension
OCI-AML5	1330983	Y	Y	Y	Y	Y	leukemia	acute_myeloid_leukaemia	LAML	MSS/MSI-L	D/F12	Suspension
OCI-M1	1330985	Y	Y	Y	Y	Y	leukemia	acute_myeloid_leukaemia	LAML	MSS/MSI-L	D/F12	Suspension
P31-FUJ	909253	Y	Y	Y	Y	Y	leukemia	acute_myeloid_leukaemia	LAML	MSI-H	R	Suspension
PL-21	1330991	Y	Y	Y	Y	Y	leukemia	acute_myeloid_leukaemia	LAML	MSS/MSI-L	R	Suspension
QIMR-WIL	910545	Y	Y	Y	Y	Y	leukemia	acute_myeloid_leukaemia	LAML	MSS/MSI-L	D/F12	Suspension
SIG-M5	909715	Y	Y	Y	Y	Y	leukemia	acute_myeloid_leukaemia	LAML	MSS/MSI-L	D/F12	Suspension
THP-1	909771	Y	Y	Y	Y	Y	leukemia	acute_myeloid_leukaemia	LAML	MSS/MSI-L	R	Suspension
KARPAS-299	907273	Y	Y	Y	Y	Y	lymphoma	anaplastic_large_cell_lymphoma		MSS/MSI-L	R	Suspension
SU-DHL-1	909742	Y	Y	Y	Y	Y	lymphoma	anaplastic_large_cell_lymphoma		MSS/MSI-L	R	Suspension
SUP-M2	1331040	Y	Y	Y	Y	Y	lymphoma	anaplastic_large_cell_lymphoma		MSS/MSI-L	R	Suspension
BALL-1	910705	Y	Y	Y	Y	Y	leukemia	B_cell_leukemia		MSS/MSI-L	R	Suspension
KARPAS-231	1327774	Y	Y	Y	Y	Y	leukemia	B_cell_leukemia		MSS/MSI-L	R	Suspension
KOPN-8	1330933	Y	Y	Y	Y	Y	leukemia	B_cell_leukemia		MSS/MSI-L	R	Suspension
MHH-CALL-2	908132	Y	Y	Y	Y	Y	leukemia	B_cell_leukemia		MSS/MSI-L	R	Suspension
MHH-PREB-1	908136	Y	Y	Y	Y	Y	leukemia	B_cell_leukemia		MSI-H	R	Suspension
MN-60	908143	Y	Y	Y	Y	Y	leukemia	B_cell_leukemia		MSI-H	D/F12	Suspension
NALM-6	908158	Y	Y	Y	Y	Y	leukemia	B_cell_leukemia		MSI-H	R	Suspension
RCH-ACV	1330994	Y	Y	Y	Y	Y	leukemia	B_cell_leukemia		MSS/MSI-L	R	Suspension
REH	909696	Y	Y	Y	Y	Y	leukemia	B_cell_leukemia		MSI-H	R	Suspension
ROS-50	1331025	Y	Y	Y	Y	Y	leukemia	B_cell_leukemia		MSS/MSI-L	R	Suspension
SUP-B8	910209	Y	Y	Y	Y	Y	leukemia	B_cell_leukemia		MSS/MSI-L	R	Suspension
U-698-M	909777	Y	Y	Y	Y	Y	leukemia	B_cell_leukemia		MSS/MSI-L	R	Suspension
A3-KAW	910935	Y	Y	Y	Y	Y	lymphoma	B_cell_lymphoma	DLBC	MSS/MSI-L	R	Suspension
A4-Fuk	910934	Y	Y	Y	Y	Y	lymphoma	B_cell_lymphoma	DLBC	MSS/MSI-L	R	Suspension
BC-1	910919	Y	Y	Y	Y	Y	lymphoma	B_cell_lymphoma	DLBC	MSS/MSI-L	R	Suspension
CRO-AP2	906807	Y	Y	Y	Y	Y	lymphoma	B_cell_lymphoma	DLBC	MSS/MSI-L	R	Suspension
CTB-1	949088	Y	Y	Y	Y	Y	lymphoma	B_cell_lymphoma	DLBC	MSS/MSI-L	R	Suspension
DB	906832	Y	Y	Y	Y	Y	lymphoma	B_cell_lymphoma	DLBC	MSS/MSI-L	R	Suspension
DOHH-2	906842	Y	Y	Y	Y	Y	lymphoma	B_cell_lymphoma	DLBC	MSS/MSI-L	R	Suspension
Farage	1297449	Y	Y	Y	Y	Y	lymphoma	B_cell_lymphoma	DLBC	MSS/MSI-L	R	Suspension
GRANTA-519	1303897	Y	Y	Y	Y	Y	lymphoma	B_cell_lymphoma	DLBC	MSS/MSI-L	D/F12	Suspension
JEKO-1	1327765	Y	Y	Y	Y	Y	lymphoma	B_cell_lymphoma	DLBC	MSS/MSI-L	R	Suspension
JSC-1	1327769	Y	Y	Y	Y	Y	lymphoma	B_cell_lymphoma	DLBC	MSS/MSI-L	R	Suspension
KARPAS-1106P	1327773	Y	Y	Y	Y	Y	lymphoma	B_cell_lymphoma	DLBC	MSS/MSI-L	R	Suspension
KARPAS-422	907274	Y	Y	Y	Y	Y	lymphoma	B_cell_lymphoma	DLBC	MSS/MSI-L	R	Suspension
MC116	907799	Y	Y	Y	Y	Y	lymphoma	B_cell_lymphoma	DLBC	MSS/MSI-L	R	Suspension
NU-DUL-1	1330982	Y	Y	Y	Y	Y	lymphoma	B_cell_lymphoma	DLBC	MSS/MSI-L	R	Suspension
OCI-LY-19	1330984	Y	Y	Y	Y	Y	lymphoma	B_cell_lymphoma	DLBC	MSS/MSI-L	D/F12	Suspension
RC-K8	1330995	Y	Y	Y	Y	Y	lymphoma	B_cell_lymphoma	DLBC	MSS/MSI-L	R	Suspension
RL	910861	Y	Y	Y	Y	Y	lymphoma	B_cell_lymphoma	DLBC	MSS/MSI-L	R	Suspension
SCC-3	910930	Y	Y	Y	Y	Y	lymphoma	B_cell_lymphoma	DLBC	MSS/MSI-L	R	Suspension
SLVL	1331032	Y	Y	Y	Y	Y	lymphoma	B_cell_lymphoma	DLBC	MSS/MSI-L	R	Suspension
SU-DHL-10	1331033	Y	Y	Y	Y	Y	lymphoma	B_cell_lymphoma	DLBC	MSS/MSI-L	R	Suspension
SU-DHL-16	1331034	Y	Y	Y	Y	Y	lymphoma	B_cell_lymphoma	DLBC	MSS/MSI-L	R	Suspension
SU-DHL-4	1331035	Y	Y	Y	Y	Y	lymphoma	B_cell_lymphoma	DLBC	MSS/MSI-L	R	Suspension
SU-DHL-5	1331036	Y	Y	Y	Y	Y	lymphoma	B_cell_lymphoma	DLBC	MSS/MSI-L	R	Suspension
SU-DHL-6	1331037	Y	Y	Y	Y	Y	lymphoma	B_cell_lymphoma	DLBC	MSS/MSI-L	R	Suspension
SU-DHL-8	1331038	Y	Y	Y	Y	Y	lymphoma	B_cell_lymphoma	DLBC	MSS/MSI-L	R	Suspension
TK	1331045	Y	Y	Y	Y	Y	lymphoma	B_cell_lymphoma	DLBC	MSS/MSI-L	R	Suspension
TUR	909773	Y	Y	Y	Y	Y	lymphoma	B_cell_lymphoma	DLBC	MSI-H	R	Suspension
VAL	1331048	Y	Y	Y	Y	Y	lymphoma	B_cell_lymphoma	DLBC	MSS/MSI-L	R	Suspension
WSU-DLCL2	1331050	Y	Y	Y	Y	Y	lymphoma	B_cell_lymphoma	DLBC	MSS/MSI-L	R	Suspension
BL-41	910706	Y	Y	Y	Y	Y	lymphoma	Burkitt_lymphoma		MSS/MSI-L	R	Suspension
CA46	910703	Y	Y	Y	Y	Y	lymphoma	Burkitt_lymphoma		MSS/MSI-L	R	Suspension
Daudi	906831	Y	Y	Y	Y	Y	lymphoma	Burkitt_lymphoma		MSS/MSI-L	R	Suspension
DG-75	906838	Y	Y	Y	Y	Y	lymphoma	Burkitt_lymphoma		MSI-H	R	Suspension
EB2	906846	Y	Y	Y	Y	Y	lymphoma	Burkitt_lymphoma		MSS/MSI-L	R	Suspension
EB-3	906847	Y	Y	Y	Y	Y	lymphoma	Burkitt_lymphoma		MSS/MSI-L	R	Suspension
GA-10	1303896	Y	Y	Y	Y	Y	lymphoma	Burkitt_lymphoma		MSS/MSI-L	R	Suspension
JiyoyeP-2003	907268	Y	Y	Y	Y	Y	lymphoma	Burkitt_lymphoma		MSS/MSI-L	R	Suspension
NAMALWA	908159	Y	Y	Y	Y	Y	lymphoma	Burkitt_lymphoma		MSS/MSI-L	R	Suspension
P32-ISH	1330987	Y	Y	Y	Y	Y	lymphoma	Burkitt_lymphoma		MSS/MSI-L	R	Suspension
Raji	909262	Y	Y	Y	Y	Y	lymphoma	Burkitt_lymphoma		MSS/MSI-L	R	Suspension
Ramos-2G6-4C10	910401	Y	Y	Y	Y	Y	lymphoma	Burkitt_lymphoma		MSS/MSI-L	R	Suspension
ST486	910906	Y	Y	Y	Y	Y	lymphoma	Burkitt_lymphoma		MSS/MSI-L	R	Suspension
BV-173	910710	Y	Y	Y	Y	Y	leukemia	chronic_myeloid_leukaemia	LCML	MSS/MSI-L	R	Suspension
CML-T1	910951	Y	Y	Y	Y	Y	leukemia	chronic_myeloid_leukaemia	LCML	MSS/MSI-L	D/F12	Suspension
EM-2	906855	Y	Y	Y	Y	Y	leukemia	chronic_myeloid_leukaemia	LCML	MSS/MSI-L	R	Suspension
JURL-MK1	1327771	Y	Y	Y	Y	Y	leukemia	chronic_myeloid_leukaemia	LCML	MSS/MSI-L	R	Suspension
K-562	905940	Y	Y	Y	Y	Y	leukemia	chronic_myeloid_leukaemia	LCML	MSS/MSI-L	D/F12	Suspension
KCL-22	1330931	Y	Y	Y	Y	Y	leukemia	chronic_myeloid_leukaemia	LCML	MSI-H	R	Suspension
KU812	907311	Y	Y	Y	Y	Y	leukemia	chronic_myeloid_leukaemia	LCML	MSS/MSI-L	R	Suspension
LAMA-84	907783	Y	Y	Y	Y	Y	leukemia	chronic_myeloid_leukaemia	LCML	MSS/MSI-L	R	Suspension
MEG-01	908126	Y	Y	Y	Y	Y	leukemia	chronic_myeloid_leukaemia	LCML	MSS/MSI-L	R	Suspension
RPMI-8866	910544	Y	Y	Y	Y	Y	leukemia	chronic_myeloid_leukaemia	LCML	MSS/MSI-L	R	Suspension
AMO-1	1295741	Y	Y	Y	Y	Y	myeloma	haematopoietic_neoplasm other	MM	MSS/MSI-L	R	Suspension
EoL-1-cell	906856	Y	Y	Y	Y	Y	leukemia	haematopoietic_neoplasm other		MSS/MSI-L	R	Suspension
JJN-3	1327766	Y	Y	Y	Y	Y	myeloma	haematopoietic_neoplasm other	MM	MSS/MSI-L	D/F12	Suspension
KARPAS-620	1327775	Y	Y	Y	Y	Y	myeloma	haematopoietic_neoplasm other	MM	MSS/MSI-L	R	Suspension
MC-CAR	683665	Y	Y	Y	Y	Y	myeloma	haematopoietic_neoplasm other	MM	MSS/MSI-L	D/F12	Suspension
SKM-1	909722	Y	Y	Y	Y	Y	leukemia	haematopoietic_neoplasm other		MSS/MSI-L	R	Suspension
HC-1	907044	Y	Y	Y	Y	Y	leukemia	hairy_cell_leukaemia		MSS/MSI-L	R	Suspension
MLMA	908142	Y	Y	Y	Y	Y	leukemia	hairy_cell_leukaemia		MSS/MSI-L	R	Semi-Adherent
Mo-T	908149	Y	Y	Y	Y	Y	leukemia	hairy_cell_leukaemia		MSS/MSI-L	D/F12	Suspension
HDLM-2	924110	Y	Y	Y	Y	Y	lymphoma	Hodgkin_lymphoma		MSS/MSI-L	R	Suspension
HD-MY-Z	907050	Y	Y	Y	Y	Y	lymphoma	Hodgkin_lymphoma		MSS/MSI-L	R	Adherent
Hs-445	1322218	Y	Y	Y	Y	Y	lymphoma	Hodgkin_lymphoma		MSS/MSI-L	R	Suspension
KM-H2	909976	Y	Y	Y	Y	Y	lymphoma	Hodgkin_lymphoma		MSS/MSI-L	R	Suspension
L-1236	1330935	Y	Y	Y	Y	Y	lymphoma	Hodgkin_lymphoma		MSS/MSI-L	R	Suspension
L-428	907322	Y	Y	Y	Y	Y	lymphoma	Hodgkin_lymphoma		MSS/MSI-L	R	Suspension
L-540	907323	Y	Y	Y	Y	Y	lymphoma	Hodgkin_lymphoma		MSS/MSI-L	R	Suspension
RPMI-6666	909701	Y	Y	Y	Y	Y	lymphoma	Hodgkin_lymphoma		MSS/MSI-L	R	Suspension
SUP-HD1	1331039	Y	Y	Y	Y	Y	lymphoma	Hodgkin_lymphoma		MSS/MSI-L	R	Suspension
KY821	907300	Y	Y	Y	Y	Y	leukemia	leukemia	LAML	MSS/MSI-L	R	Suspension
MV-4-11	908156	Y	Y	Y	Y	Y	leukemia	leukemia		MSS/MSI-L	D/F12	Suspension
RS4-11	909703	Y	Y	Y	Y	Y	leukemia	leukemia	ALL	MSI-H	R	Suspension
697	906800	Y	Y	Y	Y	Y	leukemia	lymphoblastic_leukemia		MSS/MSI-L	R	Suspension
ALL-PO	910944	Y	Y	Y	Y	Y	leukemia	lymphoblastic_leukemia	ALL	MSS/MSI-L	R	Suspension
BE-13	906763	Y	Y	Y	Y	Y	leukemia	lymphoblastic_leukemia	ALL	MSS/MSI-L	R	Suspension
CCRF-CEM	905952	Y	Y	Y	Y	Y	leukemia	lymphoblastic_leukemia	ALL	MSS/MSI-L	R	Suspension
GR-ST	906877	Y	Y	Y	Y	Y	leukemia	lymphoblastic_leukemia	ALL	MSI-H	R	Suspension
HAL-01	949153	Y	Y	Y	Y	Y	leukemia	lymphoblastic_leukemia	ALL	MSS/MSI-L	R	Suspension
KARPAS-45	907272	Y	Y	Y	Y	Y	leukemia	lymphoblastic_leukemia	ALL	MSS/MSI-L	R	Suspension
KE-37	907277	Y	Y	Y	Y	Y	leukemia	lymphoblastic_leukemia	ALL	MSS/MSI-L	R	Suspension
LC4-1	907787	Y	Y	Y	Y	Y	leukemia	lymphoblastic_leukemia	ALL	MSS/MSI-L	R	Suspension
MOLT-4	905958	Y	Y	Y	Y	Y	leukemia	lymphoblastic_leukemia	ALL	MSI-H	R	Suspension
P30-OHK	909252	Y	Y	Y	Y	Y	leukemia	lymphoblastic_leukemia	ALL	MSI-H	R	Suspension
SUP-B15	1247871	Y	Y	Y	Y	Y	leukemia	lymphoblastic_leukemia	ALL	MSS/MSI-L	D/F12	Suspension
ATN-1	910687	Y	Y	Y	Y	Y	leukemia	lymphoblastic_T_cell_leukaemia	ALL	MSS/MSI-L	R	Suspension
LOUCY	907789	Y	Y	Y	Y	Y	leukemia	lymphoblastic_T_cell_leukaemia	ALL	MSS/MSI-L	R	Suspension
MOLT-13	908146	Y	Y	Y	Y	Y	leukemia	lymphoblastic_T_cell_leukaemia	ALL	MSI-H	R	Suspension
MOLT-16	908147	Y	Y	Y	Y	Y	leukemia	lymphoblastic_T_cell_leukaemia	ALL	MSS/MSI-L	R	Suspension
P12-ICHIKAWA	909251	Y	Y	Y	Y	Y	leukemia	lymphoblastic_T_cell_leukaemia	ALL	MSS/MSI-L	R	Suspension
PF-382	909260	Y	Y	Y	Y	Y	leukemia	lymphoblastic_T_cell_leukaemia	ALL	MSS/MSI-L	R	Suspension
RPMI-8402	909702	Y	Y	Y	Y	Y	leukemia	lymphoblastic_T_cell_leukaemia	ALL	MSS/MSI-L	R	Suspension
SUP-T1	909743	Y	Y	Y	Y	Y	leukemia	lymphoblastic_T_cell_leukaemia	ALL	MSS/MSI-L	R	Suspension
DEL	906836	Y	Y	Y	Y	Y	lymphoma	lymphoid_neoplasm other		MSS/MSI-L	R	Suspension
EHEB	906854	Y	Y	Y	Y	Y	lymphoma	lymphoid_neoplasm other	CLL	MSS/MSI-L	R	Suspension
EJM	1297447	Y	Y	Y	Y	Y	myeloma	lymphoid_neoplasm other	MM	MSS/MSI-L	D/F12	Semi-Adherent
H9	907043	Y	Y	Y	Y	Y	lymphoma	lymphoid_neoplasm other		MSS/MSI-L	R	Suspension
JVM-2	907269	Y	Y	Y	Y	Y	lymphoma	lymphoid_neoplasm other	CLL	MSS/MSI-L	R	Suspension
JVM-3	907270	Y	Y	Y	Y	Y	lymphoma	lymphoid_neoplasm other	CLL	MSS/MSI-L	R	Suspension
SR	905965	Y	Y	Y	Y	Y	lymphoma	lymphoid_neoplasm other		MSS/MSI-L	R	Suspension
WIL2-NS	1331049	Y	Y	Y	Y	Y	lymphoma	lymphoid_neoplasm other		MSS/MSI-L	R	Suspension
WSU-NHL	909785	Y	Y	Y	Y	Y	lymphoma	lymphoid_neoplasm other		MSI-H	R	Suspension
YT	946358	Y	Y	Y	Y	Y	lymphoma	lymphoid_neoplasm other	ALL	MSS/MSI-L	D/F12	Suspension
ARH-77	906765	Y	Y	Y	Y	Y	myeloma	myeloma	MM	MSS/MSI-L	R	Suspension
IM-9	753563	Y	Y	Y	Y	Y	myeloma	myeloma	MM	MSS/MSI-L	R	Suspension
KMS-12-BM	907281	Y	Y	Y	Y	Y	myeloma	myeloma	MM	MSS/MSI-L	R	Suspension
L-363	924239	Y	Y	Y	Y	Y	myeloma	myeloma	MM	MSS/MSI-L	R	Suspension
LP-1	907791	Y	Y	Y	Y	Y	myeloma	myeloma	MM	MSS/MSI-L	D/F12	Suspension
MM1S	1659818	Y	Y	Y	Y	Y	myeloma	myeloma	MM	MSS/MSI-L	R	Suspension
MOLP-8	1330950	Y	Y	Y	Y	Y	myeloma	myeloma	MM	MSS/MSI-L	R	Suspension
NCI-H929	724825	Y	Y	Y	Y	Y	myeloma	myeloma	MM	MSS/MSI-L	R	Suspension
OPM-2	909249	Y	Y	Y	Y	Y	myeloma	myeloma	MM	MSS/MSI-L	R	Suspension
RPMI-8226	905964	Y	Y	Y	Y	Y	myeloma	myeloma	MM	MSS/MSI-L	R	Suspension
SK-MM-2	753612	Y	Y	Y	Y	Y	myeloma	myeloma	MM	MSS/MSI-L	R	Suspension
U-266	753615	Y	Y	Y	Y	Y	myeloma	myeloma	MM	MSS/MSI-L	R	Semi-Adherent
ALL-SIL	1295740	Y	Y	Y	Y	Y	leukemia	T_cell_leukemia	ALL	MSS/MSI-L	R	Suspension
DND-41	1297446	Y	Y	Y	Y	Y	leukemia	T_cell_leukemia	ALL	MSI-H	R	Suspension
HH	907056	Y	Y	Y	Y	Y	leukemia	T_cell_leukemia		MSS/MSI-L	R	Suspension
Jurkat	998184	Y	Y	Y	Y	Y	leukemia	T_cell_leukemia	ALL	MSI-H	R	Suspension
CS1	1290795	Y	Y	Y	Y	Y	bone	bone_other		MSS/MSI-L	R	Adherent
SJSA-1	909717	Y	Y	Y	Y	Y	bone	bone_other		MSS/MSI-L	R	Adherent
CAL-78	1290765	Y	Y	Y	Y	Y	bone	chondrosarcoma		MSS/MSI-L	R	Adherent
CHSA8926	1303912	Y	Y	Y	Y	Y	bone	chondrosarcoma		MSS/MSI-L	R	Adherent
H-EMC-SS	907290	Y	Y	Y	Y	Y	bone	chondrosarcoma		MSS/MSI-L	D/F12	Adherent
CADO-ES1	753539	Y	Y	Y	Y	Y	bone	ewings_sarcoma		MSS/MSI-L	R	Suspension
ES1	949158	Y	Y	Y	Y	Y	bone	ewings_sarcoma		MSS/MSI-L	R	Adherent
ES3	684055	Y	Y	Y	Y	Y	bone	ewings_sarcoma		MSS/MSI-L	R	Adherent
ES4	949156	Y	Y	Y	Y	Y	bone	ewings_sarcoma		MSS/MSI-L	R	Adherent
ES5	684057	Y	Y	Y	Y	Y	bone	ewings_sarcoma		MSS/MSI-L	R	Adherent
ES7	684059	Y	Y	Y	Y	Y	bone	ewings_sarcoma		MSS/MSI-L	R	Adherent
ES8	949155	Y	Y	Y	Y	Y	bone	ewings_sarcoma		MSS/MSI-L	R	Adherent
EW-1	949163	Y	Y	Y	Y	Y	bone	ewings_sarcoma		MSS/MSI-L	R	Semi-Adherent
EW-11	684062	Y	Y	Y	Y	Y	bone	ewings_sarcoma		MSS/MSI-L	R	Adherent
EW-12	949162	Y	Y	Y	Y	Y	bone	ewings_sarcoma		MSS/MSI-L	R	Suspension
EW-13	949166	Y	Y	Y	Y	Y	bone	ewings_sarcoma		MSS/MSI-L	R	Suspension
EW-16	949165	Y	Y	Y	Y	Y	bone	ewings_sarcoma		MSS/MSI-L	R	Adherent
EW-18	949164	Y	Y	Y	Y	Y	bone	ewings_sarcoma		MSS/MSI-L	R	Suspension
EW-22	949167	Y	Y	Y	Y	Y	bone	ewings_sarcoma		MSS/MSI-L	R	Adherent
EW-24	949168	Y	Y	Y	Y	Y	bone	ewings_sarcoma		MSS/MSI-L	R	Semi-Adherent
EW-3	949161	Y	Y	Y	Y	Y	bone	ewings_sarcoma		MSS/MSI-L	R	Adherent
EW-7	949160	Y	Y	Y	Y	Y	bone	ewings_sarcoma		MSS/MSI-L	R	Semi-Adherent
SK-ES-1	684072	Y	Y	Y	Y	Y	bone	ewings_sarcoma		MSS/MSI-L	R	Semi-Adherent
SK-PN-DW	909731	Y	Y	Y	Y	Y	bone	ewings_sarcoma		MSS/MSI-L	D/F12	Adherent
TC-71	1240221	Y	Y	Y	Y	Y	bone	ewings_sarcoma		MSS/MSI-L	D/F12	Adherent
CAL-72	906827	Y	Y	Y	Y	Y	bone	osteosarcoma		MSS/MSI-L	D/F12	Adherent
G-292 Clone A141B1	1290807	Y	Y	Y	Y	Y	bone	osteosarcoma		MSS/MSI-L	R	Adherent
HOS	907060	Y	Y	Y	Y	Y	bone	osteosarcoma		MSS/MSI-L	D/F12	Adherent
HuO-3N1	909977	Y	Y	Y	Y	Y	bone	osteosarcoma		MSS/MSI-L	R	Adherent
HuO9	907072	Y	Y	Y	Y	Y	bone	osteosarcoma		MSS/MSI-L	R	Adherent
MG-63	908131	Y	Y	Y	Y	Y	bone	osteosarcoma		MSS/MSI-L	D/F12	Adherent
NOS-1	925345	Y	Y	Y	Y	Y	bone	osteosarcoma		MSS/MSI-L	R	Adherent
NY	910849	Y	Y	Y	Y	Y	bone	osteosarcoma		MSS/MSI-L	D/F12	Adherent
Saos-2	909707	Y	Y	Y	Y	Y	bone	osteosarcoma		MSS/MSI-L	R	Adherent
U-2-OS	909776	Y	Y	Y	Y	Y	bone	osteosarcoma		MSS/MSI-L	R	Adherent
AU565	910704	Y	Y	Y	Y	Y	breast	breast	BRCA	MSS/MSI-L	R	Adherent
BT-20	906801	Y	Y	Y	Y	Y	breast	breast	BRCA	MSS/MSI-L	D/F12	Adherent
BT-474	946359	Y	Y	Y	Y	Y	breast	breast	BRCA	MSS/MSI-L	R	Adherent
BT-483	949093	Y	Y	Y	Y	Y	breast	breast	BRCA	MSS/MSI-L	R	Adherent
BT-549	905951	Y	Y	Y	Y	Y	breast	breast	BRCA	MSS/MSI-L	R	Adherent
CAL-120	906826	Y	Y	Y	Y	Y	breast	breast	BRCA	MSS/MSI-L	D/F12	Adherent
CAL-148	924106	Y	Y	Y	Y	Y	breast	breast	BRCA	MSS/MSI-L	D/F12	Suspension
CAL-51	910927	Y	Y	Y	Y	Y	breast	breast	BRCA	MSS/MSI-L	D/F12	Adherent
CAL-85-1	910852	Y	Y	Y	Y	Y	breast	breast	BRCA	MSS/MSI-L	D/F12	Adherent
CAMA-1	946382	Y	Y	Y	Y	Y	breast	breast	BRCA	MSS/MSI-L	D/F12	Adherent
COLO-824	906812	Y	Y	Y	Y	Y	breast	breast	BRCA	MSS/MSI-L	R	Adherent
DU-4475	906844	Y	Y	Y	Y	Y	breast	breast	BRCA	MSS/MSI-L	R	Suspension
EFM-19	906851	Y	Y	Y	Y	Y	breast	breast	BRCA	MSS/MSI-L	R	Adherent
EFM-192A	1290798	Y	Y	Y	Y	Y	breast	breast	BRCA	MSS/MSI-L	R	Adherent
EVSA-T	906862	Y	Y	Y	Y	Y	breast	breast	BRCA	MSS/MSI-L	D/F12	Adherent
HCC1143	749710	Y	Y	Y	Y	Y	breast	breast	BRCA	MSS/MSI-L	R	Adherent
HCC1187	749711	Y	Y	Y	Y	Y	breast	breast	BRCA	MSS/MSI-L	R	Suspension
HCC1395	749712	Y	Y	Y	Y	Y	breast	breast	BRCA	MSS/MSI-L	R	Adherent
HCC1419	907045	Y	Y	Y	Y	Y	breast	breast	BRCA	MSS/MSI-L	R	Adherent
HCC1428	1290905	Y	Y	Y	Y	Y	breast	breast	BRCA	MSS/MSI-L	R	Adherent
HCC1500	1303900	Y	Y	Y	Y	Y	breast	breast	BRCA	MSS/MSI-L	R	Adherent
HCC1569	907046	Y	Y	Y	Y	Y	breast	breast	BRCA	MSI-H	R	Adherent
HCC1599	749713	Y	Y	Y	Y	Y	breast	breast	BRCA	MSS/MSI-L	R	Suspension
HCC1806	907047	Y	Y	Y	Y	Y	breast	breast		MSS/MSI-L	R	Adherent
HCC1937	749714	Y	Y	Y	Y	Y	breast	breast	BRCA	MSS/MSI-L	R	Adherent
HCC1954	749709	Y	Y	Y	Y	Y	breast	breast	BRCA	MSS/MSI-L	R	Adherent
HCC202	1290906	Y	Y	Y	Y	Y	breast	breast	BRCA	MSS/MSI-L	R	Adherent
HCC2157	749715	Y	Y	Y	Y	Y	breast	breast	BRCA	MSS/MSI-L	D/F12	Suspension
HCC2218	749716	Y	Y	Y	Y	Y	breast	breast	BRCA	MSS/MSI-L	R	Suspension
HCC38	749717	Y	Y	Y	Y	Y	breast	breast	BRCA	MSS/MSI-L	R	Adherent
HCC70	907048	Y	Y	Y	Y	Y	breast	breast	BRCA	MSS/MSI-L	R	Adherent
HDQ-P1	1290922	Y	Y	Y	Y	Y	breast	breast	BRCA	MSS/MSI-L	D/F12	Adherent
Hs-578-T	905957	Y	Y	Y	Y	Y	breast	breast	BRCA	MSS/MSI-L	D/F12	Adherent
MCF7	905946	Y	Y	Y	Y	Y	breast	breast	BRCA	MSS/MSI-L	D/F12	Adherent
MDA-MB-157	925338	Y	Y	Y	Y	Y	breast	breast	BRCA	MSS/MSI-L	D/F12	Adherent
MDA-MB-231	905960	Y	Y	Y	Y	Y	breast	breast	BRCA	MSS/MSI-L	D/F12	Adherent
MDA-MB-330	1330941	Y	Y	Y	Y	Y	breast	breast	BRCA	MSS/MSI-L	D/F12	Adherent
MDA-MB-361	908121	Y	Y	Y	Y	Y	breast	breast	BRCA	MSS/MSI-L	D/F12	Adherent
MDA-MB-415	924240	Y	Y	Y	Y	Y	breast	breast	BRCA	MSS/MSI-L	D/F12	Adherent
MDA-MB-436	1240172	Y	Y	Y	Y	Y	breast	breast	BRCA	MSS/MSI-L	D/F12	Adherent
MDA-MB-453	908122	Y	Y	Y	Y	Y	breast	breast	BRCA	MSS/MSI-L	D/F12	Adherent
MDA-MB-468	908123	Y	Y	Y	Y	Y	breast	breast	BRCA	MSS/MSI-L	D/F12	Adherent
MFM-223	910948	Y	Y	Y	Y	Y	breast	breast	BRCA	MSS/MSI-L	D/F12	Adherent
MRK-nu-1	908151	Y	Y	Y	Y	Y	breast	breast	BRCA	MSS/MSI-L	D/F12	Suspension
OCUB-M	909256	Y	Y	Y	Y	Y	breast	breast	BRCA	MSS/MSI-L	D/F12	Adherent
T47D	905945	Y	Y	Y	Y	Y	breast	breast	BRCA	MSS/MSI-L	R	Adherent
UACC-812	910910	Y	Y	Y	Y	Y	breast	breast	BRCA	MSS/MSI-L	D/F12	Adherent
UACC-893	909778	Y	Y	Y	Y	Y	breast	breast	BRCA	MSS/MSI-L	D/F12	Adherent
ZR-75-30	909907	Y	Y	Y	Y	Y	breast	breast	BRCA	MSS/MSI-L	R	Adherent
EGI-1	906853	Y	Y	Y	Y	Y	digestive_system	biliary_tract		MSS/MSI-L	D/F12	Adherent
ETK-1	906861	Y	Y	Y	Y	Y	digestive_system	biliary_tract		MSS/MSI-L	R	Adherent
HuCCT1	907069	Y	Y	Y	Y	Y	digestive_system	biliary_tract		MSS/MSI-L	R	Adherent
TGBC1TKB	909769	Y	Y	Y	Y	Y	digestive_system	biliary_tract		MSS/MSI-L	D/F12	Adherent
TGBC24TKB	910695	Y	Y	Y	Y	Y	digestive_system	biliary_tract		MSS/MSI-L	D/F12	Adherent
HUTU-80	907073	Y	Y	Y	Y	Y	digestive_system	digestive_system_other		MSS/MSI-L	D/F12	Adherent
C2BBe1	910700	Y	Y	Y	Y	Y	large_intestine	large_intestine	COAD/READ	MSS/MSI-L	D/F12	Adherent
CaR-1	924108	Y	Y	Y	Y	Y	large_intestine	large_intestine	COAD/READ	MSS/MSI-L	D/F12	Adherent
CCK-81	1240123	Y	Y	Y	Y	Y	large_intestine	large_intestine	COAD/READ	MSI-H	R	Adherent
CL-11	1290769	Y	Y	Y	Y	Y	large_intestine	large_intestine	COAD/READ	MSS/MSI-L	D/F12	Adherent
CL-40	1240124	Y	Y	Y	Y	Y	large_intestine	large_intestine	COAD/READ	MSS/MSI-L	D/F12	Adherent
COLO-205	905961	Y	Y	Y	Y	Y	large_intestine	large_intestine	COAD/READ	MSS/MSI-L	R	Suspension
COLO-320-HSR	910569	Y	Y	Y	Y	Y	large_intestine	large_intestine	COAD/READ	MSS/MSI-L	R	Suspension
COLO-678	910689	Y	Y	Y	Y	Y	large_intestine	large_intestine	COAD/READ	MSS/MSI-L	R	Semi-Adherent
CW-2	910554	Y	Y	Y	Y	Y	large_intestine	large_intestine	COAD/READ	MSI-H	R	Adherent
GP5d	907291	Y	Y	Y	Y	Y	large_intestine	large_intestine	COAD/READ	MSI-H	D/F12	Adherent
HCC2998	905971	Y	Y	Y	Y	Y	large_intestine	large_intestine	COAD/READ	MSS/MSI-L	R	Adherent
HCC-56	1290907	Y	Y	Y	Y	Y	large_intestine	large_intestine	COAD/READ	MSS/MSI-L	R	Adherent
HCT-116	905936	Y	Y	Y	Y	Y	large_intestine	large_intestine	COAD/READ	MSI-H	R	Adherent
HCT-15	905937	Y	Y	Y	Y	Y	large_intestine	large_intestine	COAD/READ	MSI-H	R	Adherent
HT-115	907289	Y	Y	Y	Y	Y	large_intestine	large_intestine	COAD/READ	MSS/MSI-L	D/F12	Adherent
HT-29	905939	Y	Y	Y	Y	Y	large_intestine	large_intestine	COAD/READ	MSS/MSI-L	R	Adherent
HT55	907287	Y	Y	Y	Y	Y	large_intestine	large_intestine	COAD/READ	MSS/MSI-L	D/F12	Adherent
KM12	905989	Y	Y	Y	Y	Y	large_intestine	large_intestine	COAD/READ	MSI-H	R	Adherent
LoVo	907790	Y	Y	Y	Y	Y	large_intestine	large_intestine	COAD/READ	MSI-H	D/F12	Adherent
LS-1034	917486	Y	Y	Y	Y	Y	large_intestine	large_intestine	COAD/READ	MSS/MSI-L	R	Adherent
LS-123	907792	Y	Y	Y	Y	Y	large_intestine	large_intestine	COAD/READ	MSS/MSI-L	D/F12	Adherent
LS-180	998189	Y	Y	Y	Y	Y	large_intestine	large_intestine	COAD/READ	MSI-H	D/F12	Adherent
LS-411N	907794	Y	Y	Y	Y	Y	large_intestine	large_intestine	COAD/READ	MSI-H	R	Adherent
LS-513	907795	Y	Y	Y	Y	Y	large_intestine	large_intestine	COAD/READ	MSS/MSI-L	R	Adherent
MDST8	1240173	Y	Y	Y	Y	Y	large_intestine	large_intestine	COAD/READ	MSS/MSI-L	R	Adherent
NCI-H630	908482	Y	Y	Y	Y	Y	large_intestine	large_intestine	COAD/READ	MSI-H	D/F12	Adherent
NCI-H716	908458	Y	Y	Y	Y	Y	large_intestine	large_intestine	COAD/READ	MSS/MSI-L	R	Suspension
NCI-H747	908457	Y	Y	Y	Y	Y	large_intestine	large_intestine	COAD/READ	MSS/MSI-L	R	Adherent
RCM-1	909263	Y	Y	Y	Y	Y	large_intestine	large_intestine	COAD/READ	MSS/MSI-L	R	Adherent
RKO	909698	Y	Y	Y	Y	Y	large_intestine	large_intestine	COAD/READ	MSI-H	D/F12	Adherent
SK-CO-1	909718	Y	Y	Y	Y	Y	large_intestine	large_intestine	COAD/READ	MSS/MSI-L	R	Adherent
SNU-1040	1659823	Y	Y	Y	Y	Y	large_intestine	large_intestine	COAD/READ	MSS/MSI-L	R	Adherent
SNU-175	1659928	Y	Y	Y	Y	Y	large_intestine	large_intestine	COAD/READ	MSI-H	R	Suspension
SNU-407	1660034	Y	Y	Y	Y	Y	large_intestine	large_intestine	COAD/READ	MSI-H	R	Adherent
SNU-61	1660035	Y	Y	Y	Y	Y	large_intestine	large_intestine	COAD/READ	MSS/MSI-L	R	Adherent
SNU-81	1660036	Y	Y	Y	Y	Y	large_intestine	large_intestine	COAD/READ	MSS/MSI-L	R	Adherent
SNU-C1	910905	Y	Y	Y	Y	Y	large_intestine	large_intestine	COAD/READ	MSS/MSI-L	R	Suspension
SNU-C2B	909740	Y	Y	Y	Y	Y	large_intestine	large_intestine	COAD/READ	MSI-H	R	Adherent
SNU-C5	1674021	Y	Y	Y	Y	Y	large_intestine	large_intestine	COAD/READ	MSI-H	R	Adherent
SW1116	909746	Y	Y	Y	Y	Y	large_intestine	large_intestine	COAD/READ	MSS/MSI-L	D/F12	Adherent
SW1417	909747	Y	Y	Y	Y	Y	large_intestine	large_intestine	COAD/READ	MSS/MSI-L	D/F12	Adherent
SW1463	909748	Y	Y	Y	Y	Y	large_intestine	large_intestine	COAD/READ	MSS/MSI-L	D/F12	Adherent
SW48	909751	Y	Y	Y	Y	Y	large_intestine	large_intestine	COAD/READ	MSI-H	D/F12	Adherent
SW837	909755	Y	Y	Y	Y	Y	large_intestine	large_intestine	COAD/READ	MSS/MSI-L	D/F12	Adherent
SW948	909757	Y	Y	Y	Y	Y	large_intestine	large_intestine	COAD/READ	MSS/MSI-L	D/F12	Adherent
T84	909761	Y	Y	Y	Y	Y	large_intestine	large_intestine	COAD/READ	MSS/MSI-L	D/F12	Adherent
C3A	910850	Y	Y	Y	Y	Y	digestive_system	liver	LIHC	MSS/MSI-L	D/F12	Adherent
Hep 3B2_1-7	1240147	Y	Y	Y	Y	Y	digestive_system	liver	LIHC	MSS/MSI-L	D/F12	Adherent
HLE	907057	Y	Y	Y	Y	Y	digestive_system	liver	LIHC	MSS/MSI-L	D/F12	Adherent
huH-1	1298146	Y	Y	Y	Y	Y	digestive_system	liver	LIHC	MSS/MSI-L	D/F12	Adherent
HuH-7	907071	Y	Y	Y	Y	Y	digestive_system	liver	LIHC	MSS/MSI-L	D/F12	Adherent
JHH-1	1298151	Y	Y	Y	Y	Y	digestive_system	liver	LIHC	MSS/MSI-L	D/F12	Adherent
JHH-6	1240159	Y	Y	Y	Y	Y	digestive_system	liver	LIHC	MSS/MSI-L	D/F12	Adherent
JHH-7	1240160	Y	Y	Y	Y	Y	digestive_system	liver	LIHC	MSS/MSI-L	D/F12	Adherent
SK-HEP-1	909719	Y	Y	Y	Y	Y	digestive_system	liver	LIHC	MSS/MSI-L	D/F12	Adherent
SNU-182	1240216	Y	Y	Y	Y	Y	digestive_system	liver	LIHC	MSS/MSI-L	R	Adherent
SNU-387	909736	Y	Y	Y	Y	Y	digestive_system	liver	LIHC	MSS/MSI-L	R	Adherent
SNU-398	1240217	Y	Y	Y	Y	Y	digestive_system	liver	LIHC	MSS/MSI-L	R	Adherent
SNU-423	909737	Y	Y	Y	Y	Y	digestive_system	liver	LIHC	MSS/MSI-L	R	Adherent
SNU-449	909738	Y	Y	Y	Y	Y	digestive_system	liver	LIHC	MSS/MSI-L	R	Adherent
SNU-475	909739	Y	Y	Y	Y	Y	digestive_system	liver	LIHC	MSS/MSI-L	R	Adherent
23132-87	910924	Y	Y	Y	Y	Y	digestive_system	stomach	STAD	MSI-H	R	Adherent
AGS	906790	Y	Y	Y	Y	Y	digestive_system	stomach	STAD	MSS/MSI-L	D/F12	Adherent
ECC10	906848	Y	Y	Y	Y	Y	digestive_system	stomach		MSS/MSI-L	R	Suspension
ECC12	906849	Y	Y	Y	Y	Y	digestive_system	stomach		MSS/MSI-L	R	Suspension
FU97	1290806	Y	Y	Y	Y	Y	digestive_system	stomach	STAD	MSS/MSI-L	D/F12	Adherent
GCIY	906869	Y	Y	Y	Y	Y	digestive_system	stomach	STAD	MSS/MSI-L	D/F12	Adherent
GT3TKB	907041	Y	Y	Y	Y	Y	digestive_system	stomach	STAD	MSS/MSI-L	D/F12	Adherent
HGC-27	907055	Y	Y	Y	Y	Y	digestive_system	stomach	STAD	MSS/MSI-L	D/F12	Adherent
Hs746T	1240151	Y	Y	Y	Y	Y	digestive_system	stomach	STAD	MSS/MSI-L	D/F12	Adherent
HSC-39	1322224	Y	Y	Y	Y	Y	digestive_system	stomach	STAD	MSS/MSI-L	D/F12	Suspension
IM-95	1240155	Y	Y	Y	Y	Y	digestive_system	stomach	STAD	MSS/MSI-L	R	Adherent
KATOIII	907276	Y	Y	Y	Y	Y	digestive_system	stomach	STAD	MSS/MSI-L	D/F12	Semi-Adherent
MKN1	908138	Y	Y	Y	Y	Y	digestive_system	stomach		MSS/MSI-L	R	Adherent
MKN28	908139	Y	Y	Y	Y	Y	digestive_system	stomach	STAD	MSS/MSI-L	R	Adherent
MKN45	925340	Y	Y	Y	Y	Y	digestive_system	stomach	STAD	MSS/MSI-L	R	Adherent
MKN7	924250	Y	Y	Y	Y	Y	digestive_system	stomach	STAD	MSS/MSI-L	R	Adherent
NCI-N87	908461	Y	Y	Y	Y	Y	digestive_system	stomach	STAD	MSS/MSI-L	R	Adherent
NCI-SNU-1	908444	Y	Y	Y	Y	Y	digestive_system	stomach	STAD	MSI-H	R	Suspension
NCI-SNU-16	908446	Y	Y	Y	Y	Y	digestive_system	stomach	STAD	MSS/MSI-L	R	Suspension
NCI-SNU-5	908445	Y	Y	Y	Y	Y	digestive_system	stomach	STAD	MSS/MSI-L	D/F12	Suspension
NUGC-3	908455	Y	Y	Y	Y	Y	digestive_system	stomach	STAD	MSI-H	R	Adherent
NUGC-4	1298357	Y	Y	Y	Y	Y	digestive_system	stomach	STAD	MSS/MSI-L	R	Adherent
OCUM-1	1298358	Y	Y	Y	Y	Y	digestive_system	stomach	STAD	MSS/MSI-L	D/F12	Adherent
RERF-GC-1B	1240209	Y	Y	Y	Y	Y	digestive_system	stomach	STAD	MSS/MSI-L	R	Adherent
RF-48	909697	Y	Y	Y	Y	Y	digestive_system	stomach	STAD	MSS/MSI-L	D/F12	Adherent
SCH	909711	Y	Y	Y	Y	Y	digestive_system	stomach		MSS/MSI-L	R	Adherent
SK-GT-2	1503364	Y	Y	Y	Y	Y	digestive_system	stomach	STAD	MSS/MSI-L	R	Adherent
TGBC11TKB	909770	Y	Y	Y	Y	Y	digestive_system	stomach	STAD	MSI-H	D/F12	Adherent
SW13	909744	Y	Y	Y	Y	Y	kidney	adrenal_gland	ACC	MSS/MSI-L	D/F12	Adherent
769-P	910922	Y	Y	Y	Y	Y	kidney	kidney	KIRC	MSS/MSI-L	R	Adherent
786-0	905947	Y	Y	Y	Y	Y	kidney	kidney	KIRC	MSS/MSI-L	R	Adherent
A498	905948	Y	Y	Y	Y	Y	kidney	kidney	KIRC	MSS/MSI-L	D/F12	Adherent
A704	910920	Y	Y	Y	Y	Y	kidney	kidney	KIRC	MSS/MSI-L	D/F12	Adherent
ACHN	905950	Y	Y	Y	Y	Y	kidney	kidney	KIRC	MSS/MSI-L	R	Adherent
BB65-RCC	753533	Y	Y	Y	Y	Y	kidney	kidney	KIRC	MSS/MSI-L	D/F12	Adherent
BFTC-909	910698	Y	Y	Y	Y	Y	kidney	kidney	KIRC	MSS/MSI-L	D/F12	Adherent
CAKI-1	905963	Y	Y	Y	Y	Y	kidney	kidney	KIRC	MSS/MSI-L	R	Adherent
CAL-54	910952	Y	Y	Y	Y	Y	kidney	kidney	KIRC	MSS/MSI-L	D/F12	Adherent
G-401	907299	Y	Y	Y	Y	Y	kidney	kidney		MSS/MSI-L	R	Adherent
HA7-RCC	753558	Y	Y	Y	Y	Y	kidney	kidney	KIRC	MSS/MSI-L	D/F12	Adherent
KMRC-1	1298168	Y	Y	Y	Y	Y	kidney	kidney	KIRC	MSS/MSI-L	D/F12	Adherent
KMRC-20	1298169	Y	Y	Y	Y	Y	kidney	kidney	KIRC	MSS/MSI-L	D/F12	Adherent
LB1047-RCC	753577	Y	Y	Y	Y	Y	kidney	kidney	KIRC	MSI-H	D/F12	Adherent
LB2241-RCC	753578	Y	Y	Y	Y	Y	kidney	kidney	KIRC	MSS/MSI-L	D/F12	Adherent
LB996-RCC	753585	Y	Y	Y	Y	Y	kidney	kidney	KIRC	MSS/MSI-L	D/F12	Adherent
NCC010	1509073	Y	Y	Y	Y	Y	kidney	kidney	KIRC	MSS/MSI-L	R	Adherent
NCC021	1509074	Y	Y	Y	Y	Y	kidney	kidney	KIRC	MSS/MSI-L	D/F12	Adherent
OS-RC-2	909250	Y	Y	Y	Y	Y	kidney	kidney	KIRC	MSS/MSI-L	R	Adherent
RCC10RGB	909974	Y	Y	Y	Y	Y	kidney	kidney	KIRC	MSS/MSI-L	D/F12	Adherent
RCC-AB	1524418	Y	Y	Y	Y	Y	kidney	kidney	KIRC	MSS/MSI-L	D/F12	Adherent
RCC-ER	1524417	Y	Y	Y	Y	Y	kidney	kidney	KIRC	MSS/MSI-L	D/F12	Adherent
RCC-FG2	1524414	Y	Y	Y	Y	Y	kidney	kidney	KIRC	MSS/MSI-L	D/F12	Adherent
RCC-JW	1524416	Y	Y	Y	Y	Y	kidney	kidney	KIRC	MSS/MSI-L	D/F12	Adherent
RCC-MF	1524419	Y	Y	Y	Y	Y	kidney	kidney	KIRC	MSS/MSI-L	D/F12	Adherent
RXF393	905978	Y	Y	Y	Y	Y	kidney	kidney	KIRC	MSS/MSI-L	R	Adherent
SN12C	905979	Y	Y	Y	Y	Y	kidney	kidney	KIRC	MSS/MSI-L	D/F12	Adherent
TK10	905980	Y	Y	Y	Y	Y	kidney	kidney	KIRC	MSS/MSI-L	R	Adherent
U031	905981	Y	Y	Y	Y	Y	kidney	kidney	KIRC	MSS/MSI-L	R	Adherent
VMRC-RCZ	909781	Y	Y	Y	Y	Y	kidney	kidney	KIRC	MSS/MSI-L	D/F12	Adherent
201T	1287381	Y	Y	Y	Y	Y	lung_NSCLC	lung_NSCLC_adenocarcinoma	LUAD	MSS/MSI-L	R	Adherent
A549	905949	Y	Y	Y	Y	Y	lung_NSCLC	lung_NSCLC_adenocarcinoma	LUAD	MSS/MSI-L	D/F12	Adherent
ABC-1	906791	Y	Y	Y	Y	Y	lung_NSCLC	lung_NSCLC_adenocarcinoma	LUAD	MSS/MSI-L	D/F12	Adherent
Calu-3	687777	Y	Y	Y	Y	Y	lung_NSCLC	lung_NSCLC_adenocarcinoma	LUAD	MSS/MSI-L	D/F12	Adherent
Calu-6	724859	Y	Y	Y	Y	Y	lung_NSCLC	lung_NSCLC_adenocarcinoma	LUAD	MSS/MSI-L	D/F12	Adherent
COR-L105	906805	Y	Y	Y	Y	Y	lung_NSCLC	lung_NSCLC_adenocarcinoma	LUAD	MSS/MSI-L	R	Adherent
EKVX	905970	Y	Y	Y	Y	Y	lung_NSCLC	lung_NSCLC_adenocarcinoma	LUAD	MSS/MSI-L	D/F12	Adherent
EMC-BAC-1	1503369	Y	Y	Y	Y	Y	lung_NSCLC	lung_NSCLC_adenocarcinoma	LUAD	MSS/MSI-L	R	Adherent
EMC-BAC-2	1503370	Y	Y	Y	Y	Y	lung_NSCLC	lung_NSCLC_adenocarcinoma	LUAD	MSS/MSI-L	R	Adherent
H3255	1247873	Y	Y	Y	Y	Y	lung_NSCLC	lung_NSCLC_adenocarcinoma	LUAD	MSS/MSI-L	R	Adherent
HCC-44	1240145	Y	Y	Y	Y	Y	lung_NSCLC	lung_NSCLC_adenocarcinoma	LUAD	MSS/MSI-L	R	Adherent
HCC-78	1290908	Y	Y	Y	Y	Y	lung_NSCLC	lung_NSCLC_adenocarcinoma	LUAD	MSS/MSI-L	R	Adherent
HCC-827	1240146	Y	Y	Y	Y	Y	lung_NSCLC	lung_NSCLC_adenocarcinoma	LUAD	MSS/MSI-L	R	Adherent
LC-2-ad	907786	Y	Y	Y	Y	Y	lung_NSCLC	lung_NSCLC_adenocarcinoma	LUAD	MSS/MSI-L	R	Adherent
LXF-289	753592	Y	Y	Y	Y	Y	lung_NSCLC	lung_NSCLC_adenocarcinoma	LUAD	MSS/MSI-L	D/F12	Adherent
NCI-H1355	724866	Y	Y	Y	Y	Y	lung_NSCLC	lung_NSCLC_adenocarcinoma	LUAD	MSS/MSI-L	D/F12	Adherent
NCI-H1395	684681	Y	Y	Y	Y	Y	lung_NSCLC	lung_NSCLC_adenocarcinoma	LUAD	MSS/MSI-L	R	Adherent
NCI-H1435	1298347	Y	Y	Y	Y	Y	lung_NSCLC	lung_NSCLC_adenocarcinoma	LUAD	MSS/MSI-L	D/F12	Semi-Adherent
NCI-H1563	753600	Y	Y	Y	Y	Y	lung_NSCLC	lung_NSCLC_adenocarcinoma	LUAD	MSS/MSI-L	R	Adherent
NCI-H1568	1298348	Y	Y	Y	Y	Y	lung_NSCLC	lung_NSCLC_adenocarcinoma	LUAD	MSS/MSI-L	R	Adherent
NCI-H1573	908472	Y	Y	Y	Y	Y	lung_NSCLC	lung_NSCLC_adenocarcinoma	LUAD	MSS/MSI-L	D/F12	Adherent
NCI-H1623	687798	Y	Y	Y	Y	Y	lung_NSCLC	lung_NSCLC_adenocarcinoma	LUAD	MSS/MSI-L	D/F12	Adherent
NCI-H1648	687799	Y	Y	Y	Y	Y	lung_NSCLC	lung_NSCLC_adenocarcinoma	LUAD	MSS/MSI-L	D/F12	Adherent
NCI-H1650	687800	Y	Y	Y	Y	Y	lung_NSCLC	lung_NSCLC_adenocarcinoma	LUAD	MSS/MSI-L	R	Adherent
NCI-H1651	910900	Y	Y	Y	Y	Y	lung_NSCLC	lung_NSCLC_adenocarcinoma	LUAD	MSS/MSI-L	D/F12	Adherent
NCI-H1666	908473	Y	Y	Y	Y	Y	lung_NSCLC	lung_NSCLC_adenocarcinoma	LUAD	MSS/MSI-L	D/F12	Semi-Adherent
NCI-H1693	687802	Y	Y	Y	Y	Y	lung_NSCLC	lung_NSCLC_adenocarcinoma	LUAD	MSS/MSI-L	R	Adherent
NCI-H1703	908474	Y	Y	Y	Y	Y	lung_NSCLC	lung_NSCLC_adenocarcinoma		MSS/MSI-L	R	Adherent
NCI-H1734	722058	Y	Y	Y	Y	Y	lung_NSCLC	lung_NSCLC_adenocarcinoma	LUAD	MSS/MSI-L	R	Adherent
NCI-H1755	908475	Y	Y	Y	Y	Y	lung_NSCLC	lung_NSCLC_adenocarcinoma	LUAD	MSS/MSI-L	R	Adherent
NCI-H1781	1298350	Y	Y	Y	Y	Y	lung_NSCLC	lung_NSCLC_adenocarcinoma	LUAD	MSS/MSI-L	R	Adherent
NCI-H1792	724868	Y	Y	Y	Y	Y	lung_NSCLC	lung_NSCLC_adenocarcinoma	LUAD	MSS/MSI-L	R	Adherent
NCI-H1793	908463	Y	Y	Y	Y	Y	lung_NSCLC	lung_NSCLC_adenocarcinoma	LUAD	MSS/MSI-L	D/F12	Adherent
NCI-H1838	687807	Y	Y	Y	Y	Y	lung_NSCLC	lung_NSCLC_adenocarcinoma	LUAD	MSS/MSI-L	R	Adherent
NCI-H1944	1240185	Y	Y	Y	Y	Y	lung_NSCLC	lung_NSCLC_adenocarcinoma	LUAD	MSS/MSI-L	D/F12	Adherent
NCI-H1975	924244	Y	Y	Y	Y	Y	lung_NSCLC	lung_NSCLC_adenocarcinoma	LUAD	MSS/MSI-L	R	Adherent
NCI-H1993	908476	Y	Y	Y	Y	Y	lung_NSCLC	lung_NSCLC_adenocarcinoma	LUAD	MSS/MSI-L	R	Adherent
NCI-H2009	724873	Y	Y	Y	Y	Y	lung_NSCLC	lung_NSCLC_adenocarcinoma	LUAD	MSS/MSI-L	D/F12	Adherent
NCI-H2023	1240187	Y	Y	Y	Y	Y	lung_NSCLC	lung_NSCLC_adenocarcinoma	LUAD	MSS/MSI-L	R	Adherent
NCI-H2030	722045	Y	Y	Y	Y	Y	lung_NSCLC	lung_NSCLC_adenocarcinoma	LUAD	MSS/MSI-L	R	Adherent
NCI-H2085	687812	Y	Y	Y	Y	Y	lung_NSCLC	lung_NSCLC_adenocarcinoma	LUAD	MSS/MSI-L	D/F12	Adherent
NCI-H2087	724834	Y	Y	Y	Y	Y	lung_NSCLC	lung_NSCLC_adenocarcinoma	LUAD	MSS/MSI-L	D/F12	Semi-Adherent
NCI-H2122	722046	Y	Y	Y	Y	Y	lung_NSCLC	lung_NSCLC_adenocarcinoma	LUAD	MSS/MSI-L	R	Adherent
NCI-H2228	687816	Y	Y	Y	Y	Y	lung_NSCLC	lung_NSCLC_adenocarcinoma	LUAD	MSS/MSI-L	R	Adherent
NCI-H2291	724874	Y	Y	Y	Y	Y	lung_NSCLC	lung_NSCLC_adenocarcinoma	LUAD	MSS/MSI-L	R	Adherent
NCI-H23	905942	Y	Y	Y	Y	Y	lung_NSCLC	lung_NSCLC_adenocarcinoma	LUAD	MSS/MSI-L	R	Adherent
NCI-H2342	687819	Y	Y	Y	Y	Y	lung_NSCLC	lung_NSCLC_adenocarcinoma	LUAD	MSS/MSI-L	D/F12	Adherent
NCI-H2347	687820	Y	Y	Y	Y	Y	lung_NSCLC	lung_NSCLC_adenocarcinoma	LUAD	MSS/MSI-L	R	Adherent
NCI-H2405	687821	Y	Y	Y	Y	Y	lung_NSCLC	lung_NSCLC_adenocarcinoma	LUAD	MSS/MSI-L	D/F12	Adherent
NCI-H292	753604	Y	Y	Y	Y	Y	lung_NSCLC	lung_NSCLC_adenocarcinoma		MSS/MSI-L	R	Adherent
NCI-H3122	1240190	Y	Y	Y	Y	Y	lung_NSCLC	lung_NSCLC_adenocarcinoma	LUAD	MSS/MSI-L	R	Adherent
NCI-H322M	905967	Y	Y	Y	Y	Y	lung_NSCLC	lung_NSCLC_adenocarcinoma	LUAD	MSS/MSI-L	R	Suspension
NCI-H358	908465	Y	Y	Y	Y	Y	lung_NSCLC	lung_NSCLC_adenocarcinoma	LUAD	MSS/MSI-L	R	Adherent
NCI-H441	908460	Y	Y	Y	Y	Y	lung_NSCLC	lung_NSCLC_adenocarcinoma	LUAD	MSS/MSI-L	R	Adherent
NCI-H522	905944	Y	Y	Y	Y	Y	lung_NSCLC	lung_NSCLC_adenocarcinoma	LUAD	MSS/MSI-L	R	Adherent
NCI-H596	908459	Y	Y	Y	Y	Y	lung_NSCLC	lung_NSCLC_adenocarcinoma		MSS/MSI-L	R	Adherent
NCI-H650	722066	Y	Y	Y	Y	Y	lung_NSCLC	lung_NSCLC_adenocarcinoma	LUAD	MSS/MSI-L	D/F12	Adherent
NCI-H838	910399	Y	Y	Y	Y	Y	lung_NSCLC	lung_NSCLC_adenocarcinoma	LUAD	MSS/MSI-L	R	Adherent
PC-14	753608	Y	Y	Y	Y	Y	lung_NSCLC	lung_NSCLC_adenocarcinoma	LUAD	MSS/MSI-L	R	Adherent
RERF-LC-KJ	1298537	Y	Y	Y	Y	Y	lung_NSCLC	lung_NSCLC_adenocarcinoma	LUAD	MSS/MSI-L	R	Adherent
RERF-LC-MS	910931	Y	Y	Y	Y	Y	lung_NSCLC	lung_NSCLC_adenocarcinoma	LUAD	MSS/MSI-L	D/F12	Adherent
SK-LU-1	909721	Y	Y	Y	Y	Y	lung_NSCLC	lung_NSCLC_adenocarcinoma	LUAD	MSS/MSI-L	D/F12	Adherent
SW1573	724878	Y	Y	Y	Y	Y	lung_NSCLC	lung_NSCLC_adenocarcinoma	LUAD	MSS/MSI-L	D/F12	Adherent
NCI-H720	687600	Y	Y	Y	Y	Y	lung_NSCLC	lung_NSCLC_carcinoid		MSS/MSI-L	D/F12	Suspension
NCI-H727	724855	Y	Y	Y	Y	Y	lung_NSCLC	lung_NSCLC_carcinoid		MSS/MSI-L	R	Adherent
NCI-H835	753607	Y	Y	Y	Y	Y	lung_NSCLC	lung_NSCLC_carcinoid		MSS/MSI-L	R	Suspension
UMC-11	909779	Y	Y	Y	Y	Y	lung_NSCLC	lung_NSCLC_carcinoid		MSS/MSI-L	D/F12	Adherent
COR-L23	687780	Y	Y	Y	Y	Y	lung_NSCLC	lung_NSCLC_large cell		MSS/MSI-L	R	Adherent
HOP-92	905973	Y	Y	Y	Y	Y	lung_NSCLC	lung_NSCLC_large cell		MSS/MSI-L	D/F12	Adherent
IA-LM	910779	Y	Y	Y	Y	Y	lung_NSCLC	lung_NSCLC_large cell		MSS/MSI-L	D/F12	Adherent
LCLC-103H	753586	Y	Y	Y	Y	Y	lung_NSCLC	lung_NSCLC_large cell		MSS/MSI-L	R	Adherent
LCLC-97TM1	946361	Y	Y	Y	Y	Y	lung_NSCLC	lung_NSCLC_large cell		MSS/MSI-L	R	Adherent
LU-65	724863	Y	Y	Y	Y	Y	lung_NSCLC	lung_NSCLC_large cell		MSS/MSI-L	R	Suspension
LU-99A	907796	Y	Y	Y	Y	Y	lung_NSCLC	lung_NSCLC_large cell		MSS/MSI-L	R	Adherent
NCI-H1155	908467	Y	Y	Y	Y	Y	lung_NSCLC	lung_NSCLC_large cell		MSS/MSI-L	D/F12	Suspension
NCI-H1299	724831	Y	Y	Y	Y	Y	lung_NSCLC	lung_NSCLC_large cell		MSS/MSI-L	R	Adherent
NCI-H1581	908471	Y	Y	Y	Y	Y	lung_NSCLC	lung_NSCLC_large cell		MSS/MSI-L	D/F12	Semi-Adherent
NCI-H1915	1240184	Y	Y	Y	Y	Y	lung_NSCLC	lung_NSCLC_large cell		MSS/MSI-L	R	Adherent
NCI-H661	687829	Y	Y	Y	Y	Y	lung_NSCLC	lung_NSCLC_large cell		MSS/MSI-L	R	Adherent
NCI-H810	925341	Y	Y	Y	Y	Y	lung_NSCLC	lung_NSCLC_large cell		MSS/MSI-L	D/F12	Adherent
A427	910851	Y	Y	Y	Y	Y	lung_NSCLC	lung_NSCLC_not specified	UNABLE TO CLASSIFY	MSS/MSI-L	D/F12	Adherent
BEN	753534	Y	Y	Y	Y	Y	lung_NSCLC	lung_NSCLC_not specified	UNABLE TO CLASSIFY	MSS/MSI-L	D/F12	Adherent
CAL-12T	753540	Y	Y	Y	Y	Y	lung_NSCLC	lung_NSCLC_not specified	UNABLE TO CLASSIFY	MSS/MSI-L	D/F12	Adherent
ChaGo-K-1	687596	Y	Y	Y	Y	Y	lung_NSCLC	lung_NSCLC_not specified	UNABLE TO CLASSIFY	MSS/MSI-L	R	Adherent
HCC-366	1240144	Y	Y	Y	Y	Y	lung_NSCLC	lung_NSCLC_not specified		MSS/MSI-L	R	Adherent
NCI-H1770	687804	Y	Y	Y	Y	Y	lung_NSCLC	lung_NSCLC_not specified	UNABLE TO CLASSIFY	MSS/MSI-L	D/F12	Suspension
NCI-H2110	1298351	Y	Y	Y	Y	Y	lung_NSCLC	lung_NSCLC_not specified	UNABLE TO CLASSIFY	MSS/MSI-L	R	Adherent
NCI-H2135	1298352	Y	Y	Y	Y	Y	lung_NSCLC	lung_NSCLC_not specified	UNABLE TO CLASSIFY	MSS/MSI-L	D/F12	Adherent
NCI-H2172	1298353	Y	Y	Y	Y	Y	lung_NSCLC	lung_NSCLC_not specified	UNABLE TO CLASSIFY	MSS/MSI-L	R	Adherent
NCI-H2444	1298356	Y	Y	Y	Y	Y	lung_NSCLC	lung_NSCLC_not specified	UNABLE TO CLASSIFY	MSS/MSI-L	R	Adherent
NCI-H647	1240191	Y	Y	Y	Y	Y	lung_NSCLC	lung_NSCLC_not specified		MSS/MSI-L	R	Adherent
EBC-1	753554	Y	Y	Y	Y	Y	lung_NSCLC	lung_NSCLC_squamous_cell_carcinoma	LUSC	MSS/MSI-L	D/F12	Adherent
EPLC-272H	753556	Y	Y	Y	Y	Y	lung_NSCLC	lung_NSCLC_squamous_cell_carcinoma	LUSC	MSS/MSI-L	R	Adherent
HARA	1240142	Y	Y	Y	Y	Y	lung_NSCLC	lung_NSCLC_squamous_cell_carcinoma	LUSC	MSS/MSI-L	R	Adherent
HCC-15	1240143	Y	Y	Y	Y	Y	lung_NSCLC	lung_NSCLC_squamous_cell_carcinoma	LUSC	MSS/MSI-L	D/F12	Adherent
KNS-62	753569	Y	Y	Y	Y	Y	lung_NSCLC	lung_NSCLC_squamous_cell_carcinoma	LUSC	MSS/MSI-L	D/F12	Adherent
LC-1-sq	1298223	Y	Y	Y	Y	Y	lung_NSCLC	lung_NSCLC_squamous_cell_carcinoma	LUSC	MSS/MSI-L	R	Adherent
LK-2	687787	Y	Y	Y	Y	Y	lung_NSCLC	lung_NSCLC_squamous_cell_carcinoma	LUSC	MSS/MSI-L	R	Adherent
LOU-NH91	1298226	Y	Y	Y	Y	Y	lung_NSCLC	lung_NSCLC_squamous_cell_carcinoma	LUSC	MSS/MSI-L	R	Adherent
NCI-H1869	1240183	Y	Y	Y	Y	Y	lung_NSCLC	lung_NSCLC_squamous_cell_carcinoma	LUSC	MSS/MSI-L	D/F12	Adherent
NCI-H2170	687815	Y	Y	Y	Y	Y	lung_NSCLC	lung_NSCLC_squamous_cell_carcinoma	LUSC	MSS/MSI-L	R	Adherent
NCI-H226	905941	Y	Y	Y	Y	Y	lung_NSCLC	lung_NSCLC_squamous_cell_carcinoma	LUSC	MSS/MSI-L	R	Adherent
NCI-H520	908443	Y	Y	Y	Y	Y	lung_NSCLC	lung_NSCLC_squamous_cell_carcinoma	LUSC	MSS/MSI-L	R	Adherent
RERF-LC-Sq1	1298538	Y	Y	Y	Y	Y	lung_NSCLC	lung_NSCLC_squamous_cell_carcinoma	LUSC	MSS/MSI-L	R	Adherent
SK-MES-1	909728	Y	Y	Y	Y	Y	lung_NSCLC	lung_NSCLC_squamous_cell_carcinoma	LUSC	MSS/MSI-L	D/F12	Adherent
SW900	724879	Y	Y	Y	Y	Y	lung_NSCLC	lung_NSCLC_squamous_cell_carcinoma	LUSC	MSS/MSI-L	R	Adherent
COR-L321	1322213	Y	Y	Y	Y	Y	lung	Lung_other	UNABLE TO CLASSIFY	MSS/MSI-L	R	Suspension
COLO-668	910692	Y	Y	Y	Y	Y	lung_SCLC	lung_small_cell_carcinoma	SCLC	MSS/MSI-L	R	Adherent
COR-L279	910937	Y	Y	Y	Y	Y	lung_SCLC	lung_small_cell_carcinoma	SCLC	MSS/MSI-L	R	Suspension
COR-L303	1297438	Y	Y	Y	Y	Y	lung_SCLC	lung_small_cell_carcinoma	SCLC	MSS/MSI-L	R	Suspension
COR-L311	687980	Y	Y	Y	Y	Y	lung_SCLC	lung_small_cell_carcinoma	SCLC	MSS/MSI-L	R	Suspension
COR-L32	1322212	Y	Y	Y	Y	Y	lung_SCLC	lung_small_cell_carcinoma	SCLC	MSS/MSI-L	R	Suspension
COR-L88	906808	Y	Y	Y	Y	Y	lung_SCLC	lung_small_cell_carcinoma	SCLC	MSS/MSI-L	R	Adherent
CPC-N	753547	Y	Y	Y	Y	Y	lung_SCLC	lung_small_cell_carcinoma	SCLC	MSS/MSI-L	R	Suspension
DMS-114	687983	Y	Y	Y	Y	Y	lung_SCLC	lung_small_cell_carcinoma	SCLC	MSS/MSI-L	D/F12	Adherent
DMS-273	687985	Y	Y	Y	Y	Y	lung_SCLC	lung_small_cell_carcinoma	SCLC	MSS/MSI-L	D/F12	Adherent
DMS-53	907295	Y	Y	Y	Y	Y	lung_SCLC	lung_small_cell_carcinoma	SCLC	MSS/MSI-L	D/F12	Adherent
IST-SL1	753564	Y	Y	Y	Y	Y	lung_SCLC	lung_small_cell_carcinoma	SCLC	MSS/MSI-L	R	Semi-Adherent
IST-SL2	753565	Y	Y	Y	Y	Y	lung_SCLC	lung_small_cell_carcinoma	SCLC	MSS/MSI-L	R	Suspension
LB647-SCLC	753582	Y	Y	Y	Y	Y	lung_SCLC	lung_small_cell_carcinoma	SCLC	MSS/MSI-L	R	Semi-Adherent
LU-134-A	753588	Y	Y	Y	Y	Y	lung_SCLC	lung_small_cell_carcinoma	SCLC	MSS/MSI-L	R	Suspension
LU-135	713899	Y	Y	Y	Y	Y	lung_SCLC	lung_small_cell_carcinoma	SCLC	MSS/MSI-L	R	Suspension
LU-139	713878	Y	Y	Y	Y	Y	lung_SCLC	lung_small_cell_carcinoma	SCLC	MSS/MSI-L	R	Suspension
LU-165	753589	Y	Y	Y	Y	Y	lung_SCLC	lung_small_cell_carcinoma	SCLC	MSS/MSI-L	R	Suspension
MS-1	753594	Y	Y	Y	Y	Y	lung_SCLC	lung_small_cell_carcinoma	SCLC	MSS/MSI-L	R	Suspension
NCI-H1048	687995	Y	Y	Y	Y	Y	lung_SCLC	lung_small_cell_carcinoma	SCLC	MSI-H	D/F12	Adherent
NCI-H1092	687997	Y	Y	Y	Y	Y	lung_SCLC	lung_small_cell_carcinoma	SCLC	MSS/MSI-L	D/F12	Suspension
NCI-H1105	908468	Y	Y	Y	Y	Y	lung_SCLC	lung_small_cell_carcinoma	SCLC	MSS/MSI-L	D/F12	Suspension
NCI-H1341	1330964	Y	Y	Y	Y	Y	lung_SCLC	lung_small_cell_carcinoma	SCLC	MSS/MSI-L	D/F12	Suspension
NCI-H1417	688001	Y	Y	Y	Y	Y	lung_SCLC	lung_small_cell_carcinoma	SCLC	MSS/MSI-L	R	Suspension
NCI-H1436	908469	Y	Y	Y	Y	Y	lung_SCLC	lung_small_cell_carcinoma	SCLC	MSS/MSI-L	D/F12	Suspension
NCI-H146	910899	Y	Y	Y	Y	Y	lung_SCLC	lung_small_cell_carcinoma	SCLC	MSS/MSI-L	R	Suspension
NCI-H1688	1298349	Y	Y	Y	Y	Y	lung_SCLC	lung_small_cell_carcinoma	SCLC	MSS/MSI-L	R	Adherent
NCI-H1694	688006	Y	Y	Y	Y	Y	lung_SCLC	lung_small_cell_carcinoma	SCLC	MSS/MSI-L	D/F12	Suspension
NCI-H1836	1240182	Y	Y	Y	Y	Y	lung_SCLC	lung_small_cell_carcinoma	SCLC	MSS/MSI-L	D/F12	Suspension
NCI-H187	688007	Y	Y	Y	Y	Y	lung_SCLC	lung_small_cell_carcinoma	SCLC	MSS/MSI-L	R	Suspension
NCI-H1876	1330972	Y	Y	Y	Y	Y	lung_SCLC	lung_small_cell_carcinoma	SCLC	MSS/MSI-L	D/F12	Adherent
NCI-H196	1240186	Y	Y	Y	Y	Y	lung_SCLC	lung_small_cell_carcinoma	SCLC	MSS/MSI-L	R	Adherent
NCI-H1963	688010	Y	Y	Y	Y	Y	lung_SCLC	lung_small_cell_carcinoma	SCLC	MSS/MSI-L	R	Suspension
NCI-H2029	688011	Y	Y	Y	Y	Y	lung_SCLC	lung_small_cell_carcinoma	SCLC	MSS/MSI-L	D/F12	Adherent
NCI-H2066	1330973	Y	Y	Y	Y	Y	lung_SCLC	lung_small_cell_carcinoma	SCLC	MSS/MSI-L	D/F12	Adherent
NCI-H209	688013	Y	Y	Y	Y	Y	lung_SCLC	lung_small_cell_carcinoma	SCLC	MSS/MSI-L	R	Suspension
NCI-H211	1240189	Y	Y	Y	Y	Y	lung_SCLC	lung_small_cell_carcinoma	SCLC	MSS/MSI-L	R	Adherent
NCI-H2141	688014	Y	Y	Y	Y	Y	lung_SCLC	lung_small_cell_carcinoma	SCLC	MSS/MSI-L	D/F12	Suspension
NCI-H2196	908481	Y	Y	Y	Y	Y	lung_SCLC	lung_small_cell_carcinoma	SCLC	MSS/MSI-L	R	Adherent
NCI-H2227	688018	Y	Y	Y	Y	Y	lung_SCLC	lung_small_cell_carcinoma	SCLC	MSS/MSI-L	R	Semi-Adherent
NCI-H250	924241	Y	Y	Y	Y	Y	lung_SCLC	lung_small_cell_carcinoma	SCLC	MSS/MSI-L	R	Suspension
NCI-H345	688021	Y	Y	Y	Y	Y	lung_SCLC	lung_small_cell_carcinoma	SCLC	MSS/MSI-L	D/F12	Suspension
NCI-H378	688022	Y	Y	Y	Y	Y	lung_SCLC	lung_small_cell_carcinoma	SCLC	MSS/MSI-L	R	Suspension
NCI-H446	688023	Y	Y	Y	Y	Y	lung_SCLC	lung_small_cell_carcinoma	SCLC	MSS/MSI-L	R	Semi-Adherent
NCI-H510A	753605	Y	Y	Y	Y	Y	lung_SCLC	lung_small_cell_carcinoma	SCLC	MSS/MSI-L	D/F12	Semi-Adherent
NCI-H524	908483	Y	Y	Y	Y	Y	lung_SCLC	lung_small_cell_carcinoma	SCLC	MSS/MSI-L	R	Suspension
NCI-H526	688025	Y	Y	Y	Y	Y	lung_SCLC	lung_small_cell_carcinoma	SCLC	MSS/MSI-L	R	Suspension
NCI-H64	688026	Y	Y	Y	Y	Y	lung_SCLC	lung_small_cell_carcinoma	SCLC	MSS/MSI-L	R	Suspension
NCI-H69	688027	Y	Y	Y	Y	Y	lung_SCLC	lung_small_cell_carcinoma	SCLC	MSS/MSI-L	R	Suspension
NCI-H748	909194	Y	Y	Y	Y	Y	lung_SCLC	lung_small_cell_carcinoma	SCLC	MSS/MSI-L	R	Suspension
NCI-H82	688031	Y	Y	Y	Y	Y	lung_SCLC	lung_small_cell_carcinoma	SCLC	MSS/MSI-L	R	Suspension
NCI-H841	1240192	Y	Y	Y	Y	Y	lung_SCLC	lung_small_cell_carcinoma	SCLC	MSS/MSI-L	D/F12	Adherent
NCI-H847	1240193	Y	Y	Y	Y	Y	lung_SCLC	lung_small_cell_carcinoma	SCLC	MSS/MSI-L	D/F12	Adherent
SBC-1	713885	Y	Y	Y	Y	Y	lung_SCLC	lung_small_cell_carcinoma	SCLC	MSS/MSI-L	R	Suspension
SBC-3	753610	Y	Y	Y	Y	Y	lung_SCLC	lung_small_cell_carcinoma	SCLC	MSS/MSI-L	D/F12	Adherent
SBC-5	713880	Y	Y	Y	Y	Y	lung_SCLC	lung_small_cell_carcinoma	SCLC	MSS/MSI-L	D/F12	Adherent
H2369	1290808	Y	Y	Y	Y	Y	lung	mesothelioma	MESO	MSS/MSI-L	R	Adherent
H2373	1290809	Y	Y	Y	Y	Y	lung	mesothelioma	MESO	MSS/MSI-L	R	Adherent
H2461	1290810	Y	Y	Y	Y	Y	lung	mesothelioma	MESO	MSS/MSI-L	R	Adherent
H2591	1240131	Y	Y	Y	Y	Y	lung	mesothelioma	MESO	MSS/MSI-L	R	Adherent
H2595	1240132	Y	Y	Y	Y	Y	lung	mesothelioma	MESO	MSS/MSI-L	R	Adherent
H2722	1290812	Y	Y	Y	Y	Y	lung	mesothelioma	MESO	MSS/MSI-L	R	Adherent
H2731	1240134	Y	Y	Y	Y	Y	lung	mesothelioma	MESO	MSS/MSI-L	R	Adherent
H2795	1290813	Y	Y	Y	Y	Y	lung	mesothelioma	MESO	MSS/MSI-L	R	Adherent
H2803	1240135	Y	Y	Y	Y	Y	lung	mesothelioma	MESO	MSS/MSI-L	R	Adherent
H2804	1240136	Y	Y	Y	Y	Y	lung	mesothelioma	MESO	MSS/MSI-L	R	Adherent
H2810	1240137	Y	Y	Y	Y	Y	lung	mesothelioma	MESO	MSS/MSI-L	R	Adherent
H2818	1290814	Y	Y	Y	Y	Y	lung	mesothelioma	MESO	MSS/MSI-L	R	Adherent
H2869	1240138	Y	Y	Y	Y	Y	lung	mesothelioma	MESO	MSS/MSI-L	R	Adherent
H290	1240139	Y	Y	Y	Y	Y	lung	mesothelioma	MESO	MSS/MSI-L	R	Adherent
H513	1240141	Y	Y	Y	Y	Y	lung	mesothelioma	MESO	MSS/MSI-L	R	Semi-Adherent
IST-MES1	907173	Y	Y	Y	Y	Y	lung	mesothelioma	MESO	MSS/MSI-L	D/F12	Adherent
MPP-89	908150	Y	Y	Y	Y	Y	lung	mesothelioma	MESO	MSS/MSI-L	D/F12	Adherent
MSTO-211H	908152	Y	Y	Y	Y	Y	lung	mesothelioma	MESO	MSS/MSI-L	R	Adherent
NCI-H2052	688058	Y	Y	Y	Y	Y	lung	mesothelioma	MESO	MSS/MSI-L	R	Adherent
NCI-H2452	908462	Y	Y	Y	Y	Y	lung	mesothelioma	MESO	MSS/MSI-L	R	Adherent
NCI-H28	908470	Y	Y	Y	Y	Y	lung	mesothelioma	MESO	MSS/MSI-L	R	Adherent
42-MG-BA	687561	Y	Y	Y	Y	Y	nervous_system	glioma	GBM	MSS/MSI-L	R	Adherent
8-MG-BA	687562	Y	Y	Y	Y	Y	nervous_system	glioma	GBM	MSS/MSI-L	D/F12	Adherent
A172	687563	Y	Y	Y	Y	Y	nervous_system	glioma	GBM	MSS/MSI-L	D/F12	Adherent
AM-38	910933	Y	Y	Y	Y	Y	nervous_system	glioma	GBM	MSS/MSI-L	D/F12	Semi-Adherent
Becker	906746	Y	Y	Y	Y	Y	nervous_system	glioma	GBM	MSS/MSI-L	D/F12	Adherent
CAS-1	910943	Y	Y	Y	Y	Y	nervous_system	glioma	GBM	MSS/MSI-L	D/F12	Adherent
CCF-STTG1	906823	Y	Y	Y	Y	Y	nervous_system	glioma	GBM	MSS/MSI-L	R	Adherent
D-247MG	946367	Y	Y	Y	Y	Y	nervous_system	glioma	GBM	MSS/MSI-L	D/F12	Adherent
D-263MG	946368	Y	Y	Y	Y	Y	nervous_system	glioma	GBM	MSS/MSI-L	D/F12	Adherent
D-336MG	946369	Y	Y	Y	Y	Y	nervous_system	glioma	LGG	MSS/MSI-L	D/F12	Adherent
D-392MG	946370	Y	Y	Y	Y	Y	nervous_system	glioma	GBM	MSS/MSI-L	D/F12	Adherent
D-502MG	946373	Y	Y	Y	Y	Y	nervous_system	glioma	LGG	MSS/MSI-L	D/F12	Adherent
D-542MG	753549	Y	Y	Y	Y	Y	nervous_system	glioma	GBM	MSS/MSI-L	D/F12	Adherent
D-566MG	946377	Y	Y	Y	Y	Y	nervous_system	glioma	GBM	MSS/MSI-L	D/F12	Adherent
DBTRG-05MG	906835	Y	Y	Y	Y	Y	nervous_system	glioma	GBM	MSS/MSI-L	R	Adherent
DK-MG	906839	Y	Y	Y	Y	Y	nervous_system	glioma	GBM	MSS/MSI-L	R	Adherent
GAMG	906868	Y	Y	Y	Y	Y	nervous_system	glioma	LGG	MSS/MSI-L	D/F12	Adherent
GB-1	687568	Y	Y	Y	Y	Y	nervous_system	glioma	GBM	MSS/MSI-L	D/F12	Adherent
GI-1	906871	Y	Y	Y	Y	Y	nervous_system	glioma	LGG	MSS/MSI-L	D/F12	Adherent
GMS-10	906873	Y	Y	Y	Y	Y	nervous_system	glioma	GBM	MSS/MSI-L	D/F12	Adherent
H4	907042	Y	Y	Y	Y	Y	nervous_system	glioma	LGG	MSS/MSI-L	D/F12	Adherent
Hs683	1240150	Y	Y	Y	Y	Y	nervous_system	glioma	LGG	MSS/MSI-L	D/F12	Adherent
KALS-1	907271	Y	Y	Y	Y	Y	nervous_system	glioma	LGG	MSS/MSI-L	R	Adherent
KINGS-1	907279	Y	Y	Y	Y	Y	nervous_system	glioma	LGG	MSS/MSI-L	R	Adherent
KNS-42	907282	Y	Y	Y	Y	Y	nervous_system	glioma	LGG	MSS/MSI-L	D/F12	Adherent
KNS-81-FD	924188	Y	Y	Y	Y	Y	nervous_system	glioma	LGG	MSS/MSI-L	D/F12	Adherent
KS-1	907313	Y	Y	Y	Y	Y	nervous_system	glioma	GBM	MSS/MSI-L	D/F12	Adherent
LN-18	1240168	Y	Y	Y	Y	Y	nervous_system	glioma	GBM	MSS/MSI-L	D/F12	Adherent
LN-229	1240169	Y	Y	Y	Y	Y	nervous_system	glioma	GBM	MSS/MSI-L	D/F12	Adherent
LN-405	910694	Y	Y	Y	Y	Y	nervous_system	glioma	GBM	MSS/MSI-L	D/F12	Adherent
LNZTA3WT4	1240170	Y	Y	Y	Y	Y	nervous_system	glioma	GBM	MSS/MSI-L	D/F12	Adherent
M059J	949094	Y	Y	Y	Y	Y	nervous_system	glioma	GBM	MSS/MSI-L	D/F12	Adherent
MOG-G-CCM	908144	Y	Y	Y	Y	Y	nervous_system	glioma	LGG	MSS/MSI-L	D/F12	Adherent
MOG-G-UVW	908145	Y	Y	Y	Y	Y	nervous_system	glioma	LGG	MSS/MSI-L	D/F12	Adherent
NMC-G1	908449	Y	Y	Y	Y	Y	nervous_system	glioma	LGG	MSS/MSI-L	D/F12	Adherent
no-10	908452	Y	Y	Y	Y	Y	nervous_system	glioma	LGG	MSS/MSI-L	D/F12	Adherent
no-11	908450	Y	Y	Y	Y	Y	nervous_system	glioma	LGG	MSS/MSI-L	D/F12	Adherent
SF126	909712	Y	Y	Y	Y	Y	nervous_system	glioma	GBM	MSS/MSI-L	D/F12	Adherent
SF268	905986	Y	Y	Y	Y	Y	nervous_system	glioma	GBM	MSS/MSI-L	R	Adherent
SF295	905985	Y	Y	Y	Y	Y	nervous_system	glioma	GBM	MSS/MSI-L	D/F12	Adherent
SF539	905984	Y	Y	Y	Y	Y	nervous_system	glioma	LGG	MSS/MSI-L	R	Adherent
SK-MG-1	909729	Y	Y	Y	Y	Y	nervous_system	glioma	GBM	MSS/MSI-L	R	Adherent
SNB75	905982	Y	Y	Y	Y	Y	nervous_system	glioma	GBM	MSS/MSI-L	R	Adherent
SW1088	909745	Y	Y	Y	Y	Y	nervous_system	glioma	GBM	MSS/MSI-L	D/F12	Adherent
SW1783	909750	Y	Y	Y	Y	Y	nervous_system	glioma	LGG	MSS/MSI-L	D/F12	Adherent
T98G	687586	Y	Y	Y	Y	Y	nervous_system	glioma	GBM	MSS/MSI-L	D/F12	Adherent
U-118-MG	687588	Y	Y	Y	Y	Y	nervous_system	glioma	GBM	MSS/MSI-L	D/F12	Adherent
U251	905983	Y	Y	Y	Y	Y	nervous_system	glioma	GBM	MSS/MSI-L	D/F12	Adherent
U-87-MG	687590	Y	Y	Y	Y	Y	nervous_system	glioma	GBM	MSS/MSI-L	D/F12	Adherent
YH-13	909905	Y	Y	Y	Y	Y	nervous_system	glioma	GBM	MSS/MSI-L	D/F12	Adherent
YKG-1	687592	Y	Y	Y	Y	Y	nervous_system	glioma	GBM	MSS/MSI-L	D/F12	Adherent
D-283MED	906834	Y	Y	Y	Y	Y	nervous_system	medulloblastoma	MB	MSS/MSI-L	D/F12	Adherent
Daoy	906833	Y	Y	Y	Y	Y	nervous_system	medulloblastoma	MB	MSS/MSI-L	D/F12	Adherent
ONS-76	909248	Y	Y	Y	Y	Y	nervous_system	medulloblastoma	MB	MSS/MSI-L	R	Adherent
PFSK-1	683667	Y	Y	Y	Y	Y	nervous_system	medulloblastoma	MB	MSS/MSI-L	R	Adherent
BE2-M17	753616	Y	Y	Y	Y	Y	neuroblastoma	neuroblastoma	NB	MSS/MSI-L	D/F12	Adherent
CHP-126	910567	Y	Y	Y	Y	Y	neuroblastoma	neuroblastoma	NB	MSS/MSI-L	R	Suspension
CHP-134	910941	Y	Y	Y	Y	Y	neuroblastoma	neuroblastoma	NB	MSS/MSI-L	R	Suspension
CHP-212	906820	Y	Y	Y	Y	Y	neuroblastoma	neuroblastoma	NB	MSS/MSI-L	D/F12	Adherent
GI-ME-N	906872	Y	Y	Y	Y	Y	neuroblastoma	neuroblastoma	NB	MSS/MSI-L	R	Adherent
GOTO	906875	Y	Y	Y	Y	Y	neuroblastoma	neuroblastoma	NB	MSS/MSI-L	R	Adherent
IMR-5	907170	Y	Y	Y	Y	Y	neuroblastoma	neuroblastoma	NB	MSS/MSI-L	R	Adherent
KELLY	753618	Y	Y	Y	Y	Y	neuroblastoma	neuroblastoma	NB	MSS/MSI-L	R	Adherent
KP-N-YN	907314	Y	Y	Y	Y	Y	neuroblastoma	neuroblastoma	NB	MSS/MSI-L	R	Adherent
LAN-6	949170	Y	Y	Y	Y	Y	neuroblastoma	neuroblastoma	NB	MSS/MSI-L	R	Adherent
MHH-NB-11	908135	Y	Y	Y	Y	Y	neuroblastoma	neuroblastoma	NB	MSS/MSI-L	R	Adherent
NB(TU)1-10	1240181	Y	Y	Y	Y	Y	neuroblastoma	neuroblastoma	NB	MSS/MSI-L	R	Adherent
NB1	949179	Y	Y	Y	Y	Y	neuroblastoma	neuroblastoma	NB	MSS/MSI-L	R	Semi-Adherent
NB10	949171	Y	Y	Y	Y	Y	neuroblastoma	neuroblastoma	NB	MSS/MSI-L	D/F12	Adherent
NB12	949172	Y	Y	Y	Y	Y	neuroblastoma	neuroblastoma	NB	MSS/MSI-L	D/F12	Adherent
NB13	949177	Y	Y	Y	Y	Y	neuroblastoma	neuroblastoma	NB	MSS/MSI-L	D/F12	Adherent
NB14	949178	Y	Y	Y	Y	Y	neuroblastoma	neuroblastoma	NB	MSS/MSI-L	D/F12	Adherent
NB17	949175	Y	Y	Y	Y	Y	neuroblastoma	neuroblastoma	NB	MSS/MSI-L	D/F12	Adherent
NB5	949176	Y	Y	Y	Y	Y	neuroblastoma	neuroblastoma	NB	MSS/MSI-L	D/F12	Adherent
NB6	949173	Y	Y	Y	Y	Y	neuroblastoma	neuroblastoma	NB	MSS/MSI-L	D/F12	Adherent
NB69	908440	Y	Y	Y	Y	Y	neuroblastoma	neuroblastoma	NB	MSS/MSI-L	D/F12	Adherent
NB7	949174	Y	Y	Y	Y	Y	neuroblastoma	neuroblastoma	NB	MSS/MSI-L	D/F12	Adherent
NH-12	908447	Y	Y	Y	Y	Y	neuroblastoma	neuroblastoma	NB	MSS/MSI-L	D/F12	Adherent
SIMA	753620	Y	Y	Y	Y	Y	neuroblastoma	neuroblastoma	NB	MSS/MSI-L	R	Adherent
SK-N-AS	724828	Y	Y	Y	Y	Y	neuroblastoma	neuroblastoma	NB	MSS/MSI-L	D/F12	Adherent
SK-N-DZ	688086	Y	Y	Y	Y	Y	neuroblastoma	neuroblastoma	NB	MSS/MSI-L	D/F12	Adherent
SK-N-FI	688087	Y	Y	Y	Y	Y	neuroblastoma	neuroblastoma	NB	MSS/MSI-L	D/F12	Adherent
SK-N-SH	717431	Y	Y	Y	Y	Y	neuroblastoma	neuroblastoma	NB	MSS/MSI-L	D/F12	Adherent
TGW	910780	Y	Y	Y	Y	Y	neuroblastoma	neuroblastoma	NB	MSS/MSI-L	D/F12	Adherent
AsPC-1	910702	Y	Y	Y	Y	Y	pancreas	pancreas	PAAD	MSS/MSI-L	R	Adherent
BxPC-3	906693	Y	Y	Y	Y	Y	pancreas	pancreas	PAAD	MSS/MSI-L	R	Adherent
CAPAN-1	753624	Y	Y	Y	Y	Y	pancreas	pancreas	PAAD	MSS/MSI-L	D/F12	Adherent
Capan-2	910915	Y	Y	Y	Y	Y	pancreas	pancreas	PAAD	MSS/MSI-L	R	Adherent
CFPAC-1	906821	Y	Y	Y	Y	Y	pancreas	pancreas	PAAD	MSS/MSI-L	R	Adherent
DAN-G	1290797	Y	Y	Y	Y	Y	pancreas	pancreas	PAAD	MSS/MSI-L	R	Adherent
HPAC	1298136	Y	Y	Y	Y	Y	pancreas	pancreas	PAAD	MSS/MSI-L	D/F12	Adherent
HPAF-II	724869	Y	Y	Y	Y	Y	pancreas	pancreas	PAAD	MSS/MSI-L	D/F12	Adherent
Hs766T	1298141	Y	Y	Y	Y	Y	pancreas	pancreas	PAAD	MSS/MSI-L	D/F12	Adherent
HuP-T3	907285	Y	Y	Y	Y	Y	pancreas	pancreas	PAAD	MSS/MSI-L	R	Adherent
HuP-T4	907286	Y	Y	Y	Y	Y	pancreas	pancreas	PAAD	MSS/MSI-L	D/F12	Adherent
KP-1N	1298216	Y	Y	Y	Y	Y	pancreas	pancreas	PAAD	MSS/MSI-L	R	Adherent
KP-3	1298219	Y	Y	Y	Y	Y	pancreas	pancreas	UNABLE TO CLASSIFY	MSS/MSI-L	R	Adherent
KP-4	753572	Y	Y	Y	Y	Y	pancreas	pancreas	PAAD	MSS/MSI-L	D/F12	Adherent
MIA-PaCa-2	724870	Y	Y	Y	Y	Y	pancreas	pancreas	PAAD	MSS/MSI-L	D/F12	Adherent
MZ1-PC	753595	Y	Y	Y	Y	Y	pancreas	pancreas	PAAD	MSS/MSI-L	R	Adherent
PANC-02-03	1298475	Y	Y	Y	Y	Y	pancreas	pancreas	PAAD	MSS/MSI-L	R	Adherent
PANC-03-27	925346	Y	Y	Y	Y	Y	pancreas	pancreas	PAAD	MSS/MSI-L	R	Adherent
PANC-04-03	1298476	Y	Y	Y	Y	Y	pancreas	pancreas	PAAD	MSS/MSI-L	R	Adherent
PANC-08-13	925347	Y	Y	Y	Y	Y	pancreas	pancreas	PAAD	MSS/MSI-L	R	Adherent
PANC-10-05	925348	Y	Y	Y	Y	Y	pancreas	pancreas	PAAD	MSS/MSI-L	R	Adherent
PA-TU-8902	1298526	Y	Y	Y	Y	Y	pancreas	pancreas	PAAD	MSS/MSI-L	D/F12	Adherent
PA-TU-8988T	1240201	Y	Y	Y	Y	Y	pancreas	pancreas	PAAD	MSS/MSI-L	D/F12	Adherent
PL18	1240208	Y	Y	Y	Y	Y	pancreas	pancreas	PAAD	MSS/MSI-L	D/F12	Adherent
PL4	1298533	Y	Y	Y	Y	Y	pancreas	pancreas	PAAD	MSS/MSI-L	D/F12	Adherent
PSN1	910546	Y	Y	Y	Y	Y	pancreas	pancreas	PAAD	MSS/MSI-L	R	Adherent
QGP-1	1298534	Y	Y	Y	Y	Y	pancreas	pancreas		MSS/MSI-L	R	Adherent
SU8686	1240218	Y	Y	Y	Y	Y	pancreas	pancreas	PAAD	MSS/MSI-L	R	Adherent
SUIT-2	1240219	Y	Y	Y	Y	Y	pancreas	pancreas	PAAD	MSS/MSI-L	R	Adherent
SW1990	910907	Y	Y	Y	Y	Y	pancreas	pancreas	PAAD	MSS/MSI-L	D/F12	Adherent
YAPC	909904	Y	Y	Y	Y	Y	pancreas	pancreas	PAAD	MSS/MSI-L	R	Adherent
451Lu	1287706	Y	Y	Y	Y	Y	skin	melanoma	SKCM	MSS/MSI-L	D/F12	Adherent
A101D	910921	Y	Y	Y	Y	Y	skin	melanoma	SKCM	MSS/MSI-L	D/F12	Adherent
A2058	906792	Y	Y	Y	Y	Y	skin	melanoma	SKCM	MSS/MSI-L	D/F12	Adherent
A375	906793	Y	Y	Y	Y	Y	skin	melanoma	SKCM	MSS/MSI-L	D/F12	Adherent
C32	906830	Y	Y	Y	Y	Y	skin	melanoma	SKCM	MSS/MSI-L	D/F12	Adherent
CHL-1	910853	Y	Y	Y	Y	Y	skin	melanoma	SKCM	MSS/MSI-L	D/F12	Adherent
COLO-679	906818	Y	Y	Y	Y	Y	skin	melanoma	SKCM	MSS/MSI-L	R	Adherent
COLO-792	906814	Y	Y	Y	Y	Y	skin	melanoma	SKCM	MSS/MSI-L	R	Adherent
COLO-800	906813	Y	Y	Y	Y	Y	skin	melanoma	SKCM	MSS/MSI-L	R	Adherent
COLO-829	687448	Y	Y	Y	Y	Y	skin	melanoma	SKCM	MSS/MSI-L	R	Adherent
CP50-MEL-B	753545	Y	Y	Y	Y	Y	skin	melanoma	SKCM	MSS/MSI-L	D/F12	Adherent
CP66-MEL	753546	Y	Y	Y	Y	Y	skin	melanoma	SKCM	MSS/MSI-L	D/F12	Adherent
G-361	906865	Y	Y	Y	Y	Y	skin	melanoma	SKCM	MSS/MSI-L	R	Adherent
GAK	910932	Y	Y	Y	Y	Y	skin	melanoma	SKCM	MSS/MSI-L	D/F12	Adherent
G-MEL	1240130	Y	Y	Y	Y	Y	skin	melanoma	SKCM	MSS/MSI-L	D/F12	Adherent
HMV-II	907058	Y	Y	Y	Y	Y	skin	melanoma	SKCM	MSS/MSI-L	R	Adherent
Hs940-T	1298145	Y	Y	Y	Y	Y	skin	melanoma	SKCM	MSS/MSI-L	D/F12	Adherent
HT-144	907067	Y	Y	Y	Y	Y	skin	melanoma	SKCM	MSS/MSI-L	R	Adherent
IGR-1	907169	Y	Y	Y	Y	Y	skin	melanoma	SKCM	MSS/MSI-L	D/F12	Adherent
IGR-37	1240153	Y	Y	Y	Y	Y	skin	melanoma	SKCM	MSS/MSI-L	D/F12	Adherent
IPC-298	907171	Y	Y	Y	Y	Y	skin	melanoma	SKCM	MSS/MSI-L	R	Adherent
IST-MEL1	907172	Y	Y	Y	Y	Y	skin	melanoma	SKCM	MSS/MSI-L	R	Adherent
LB2518-MEL	753579	Y	Y	Y	Y	Y	skin	melanoma	SKCM	MSS/MSI-L	D/F12	Adherent
LB373-MEL-D	753581	Y	Y	Y	Y	Y	skin	melanoma	SKCM	MSS/MSI-L	D/F12	Adherent
LOXIMVI	905974	Y	Y	Y	Y	Y	skin	melanoma	SKCM	MSS/MSI-L	R	Semi-Adherent
M14	905975	Y	Y	Y	Y	Y	skin	melanoma	SKCM	MSS/MSI-L	R	Adherent
MEL-HO	908124	Y	Y	Y	Y	Y	skin	melanoma	SKCM	MSS/MSI-L	R	Adherent
MEL-JUSO	908125	Y	Y	Y	Y	Y	skin	melanoma	SKCM	MSS/MSI-L	R	Adherent
Mewo	908128	Y	Y	Y	Y	Y	skin	melanoma	SKCM	MSS/MSI-L	R	Adherent
MMAC-SF	925339	Y	Y	Y	Y	Y	skin	melanoma	SKCM	MSS/MSI-L	D/F12	Adherent
MZ2-MEL	971777	Y	Y	Y	Y	Y	skin	melanoma	SKCM	MSS/MSI-L	D/F12	Adherent
MZ7-mel	753596	Y	Y	Y	Y	Y	skin	melanoma	SKCM	MSS/MSI-L	R	Adherent
RPMI-7951	910903	Y	Y	Y	Y	Y	skin	melanoma	SKCM	MSS/MSI-L	D/F12	Adherent
RVH-421	909706	Y	Y	Y	Y	Y	skin	melanoma	SKCM	MSS/MSI-L	R	Adherent
SH-4	909713	Y	Y	Y	Y	Y	skin	melanoma	SKCM	MSS/MSI-L	D/F12	Adherent
SK-MEL-1	909723	Y	Y	Y	Y	Y	skin	melanoma	SKCM	MSS/MSI-L	D/F12	Suspension
SK-MEL-2	905955	Y	Y	Y	Y	Y	skin	melanoma	SKCM	MSI-H	R	Adherent
SK-MEL-24	909725	Y	Y	Y	Y	Y	skin	melanoma	SKCM	MSS/MSI-L	D/F12	Adherent
SK-MEL-28	905954	Y	Y	Y	Y	Y	skin	melanoma	SKCM	MSS/MSI-L	D/F12	Adherent
SK-MEL-3	909724	Y	Y	Y	Y	Y	skin	melanoma	SKCM	MSS/MSI-L	R	Adherent
SK-MEL-30	909726	Y	Y	Y	Y	Y	skin	melanoma	SKCM	MSS/MSI-L	R	Adherent
SK-MEL-31	909727	Y	Y	Y	Y	Y	skin	melanoma	SKCM	MSS/MSI-L	D/F12	Adherent
SK-MEL-5	905956	Y	Y	Y	Y	Y	skin	melanoma	SKCM	MSS/MSI-L	D/F12	Adherent
UACC-257	905977	Y	Y	Y	Y	Y	skin	melanoma	SKCM	MSS/MSI-L	R	Adherent
UACC-62	905976	Y	Y	Y	Y	Y	skin	melanoma	SKCM	MSS/MSI-L	D/F12	Adherent
WM-115	909784	Y	Y	Y	Y	Y	skin	melanoma	SKCM	MSS/MSI-L	D/F12	Adherent
WM1552C	1299078	Y	Y	Y	Y	Y	skin	melanoma	SKCM	MSS/MSI-L	R	Adherent
WM278	1240226	Y	Y	Y	Y	Y	skin	melanoma	SKCM	MSS/MSI-L	R	Adherent
WM35	1299080	Y	Y	Y	Y	Y	skin	melanoma	SKCM	MSS/MSI-L	R	Adherent
WM793B	1299081	Y	Y	Y	Y	Y	skin	melanoma	SKCM	MSS/MSI-L	R	Adherent
A388	910697	Y	Y	Y	Y	Y	skin	skin_other		MSS/MSI-L	D/F12	Adherent
A431	910925	Y	Y	Y	Y	Y	skin	skin_other		MSS/MSI-L	D/F12	Adherent
DJM-1	906841	Y	Y	Y	Y	Y	skin	skin_other		MSS/MSI-L	D/F12	Adherent
HT-1080	907064	Y	Y	Y	Y	Y	soft_tissue	fibrosarcoma		MSS/MSI-L	D/F12	Adherent
SW684	909754	Y	Y	Y	Y	Y	soft_tissue	fibrosarcoma		MSS/MSI-L	D/F12	Adherent
A204	910784	Y	Y	Y	Y	Y	soft_tissue	rhabdomyosarcoma		MSS/MSI-L	R	Adherent
A673	684052	Y	Y	Y	Y	Y	soft_tissue	rhabdomyosarcoma		MSS/MSI-L	D/F12	Adherent
KYM-1	1240166	Y	Y	Y	Y	Y	soft_tissue	rhabdomyosarcoma		MSS/MSI-L	D/F12	Adherent
RD	909264	Y	Y	Y	Y	Y	soft_tissue	rhabdomyosarcoma		MSS/MSI-L	D/F12	Adherent
RH-1	971773	Y	Y	Y	Y	Y	soft_tissue	rhabdomyosarcoma		MSS/MSI-L	R	Adherent
RH-18	971774	Y	Y	Y	Y	Y	soft_tissue	rhabdomyosarcoma		MSS/MSI-L	R	Adherent
RH-41	1240210	Y	Y	Y	Y	Y	soft_tissue	rhabdomyosarcoma		MSS/MSI-L	R	Adherent
SJRH30	909716	Y	Y	Y	Y	Y	soft_tissue	rhabdomyosarcoma		MSS/MSI-L	R	Adherent
TE-441-T	924248	Y	Y	Y	Y	Y	soft_tissue	rhabdomyosarcoma		MSS/MSI-L	D/F12	Adherent
G-402	907298	Y	Y	Y	Y	Y	soft_tissue	soft_tissue_other		MSS/MSI-L	R	Adherent
GCT	906999	Y	Y	Y	Y	Y	soft_tissue	soft_tissue_other		MSS/MSI-L	R	Adherent
MFH-ino	925343	Y	Y	Y	Y	Y	soft_tissue	soft_tissue_other		MSS/MSI-L	D/F12	Adherent
SK-LMS-1	909720	Y	Y	Y	Y	Y	soft_tissue	soft_tissue_other		MSS/MSI-L	D/F12	Adherent
SK-UT-1	909732	Y	Y	Y	Y	Y	soft_tissue	soft_tissue_other		MSI-H	D/F12	Adherent
SW872	909756	Y	Y	Y	Y	Y	soft_tissue	soft_tissue_other		MSS/MSI-L	D/F12	Adherent
SW982	909759	Y	Y	Y	Y	Y	soft_tissue	soft_tissue_other		MSS/MSI-L	D/F12	Adherent
VA-ES-BJ	688121	Y	Y	Y	Y	Y	soft_tissue	soft_tissue_other		MSS/MSI-L	D/F12	Adherent
8305C	906795	Y	Y	Y	Y	Y	thyroid	thyroid	THCA	MSS/MSI-L	R	Adherent
8505C	924102	Y	Y	Y	Y	Y	thyroid	thyroid	THCA	MSS/MSI-L	R	Adherent
ASH-3	1290722	Y	Y	Y	Y	Y	thyroid	thyroid	THCA	MSS/MSI-L	D/F12	Adherent
BCPAP	924104	Y	Y	Y	Y	Y	thyroid	thyroid	THCA	MSS/MSI-L	R	Adherent
BHT-101	906696	Y	Y	Y	Y	Y	thyroid	thyroid	THCA	MSS/MSI-L	D/F12	Adherent
CAL-62	906828	Y	Y	Y	Y	Y	thyroid	thyroid	THCA	MSS/MSI-L	D/F12	Adherent
CGTH-W-1	910568	Y	Y	Y	Y	Y	thyroid	thyroid	THCA	MSS/MSI-L	R	Adherent
FTC-133	906864	Y	Y	Y	Y	Y	thyroid	thyroid	THCA	MSS/MSI-L	D/F12	Adherent
HTC-C3	924151	Y	Y	Y	Y	Y	thyroid	thyroid	THCA	MSS/MSI-L	D/F12	Adherent
IHH-4	1240154	Y	Y	Y	Y	Y	thyroid	thyroid	THCA	MSS/MSI-L	D/F12	Semi-Adherent
K5	924238	Y	Y	Y	Y	Y	thyroid	thyroid	THCA	MSS/MSI-L	D/F12	Adherent
ML-1	1240178	Y	Y	Y	Y	Y	thyroid	thyroid	THCA	MSS/MSI-L	D/F12	Adherent
RO82-W-1	930083	Y	Y	Y	Y	Y	thyroid	thyroid	THCA	MSS/MSI-L	D/F12	Adherent
TT	930299	Y	Y	Y	Y	Y	thyroid	thyroid	THCA	MSS/MSI-L	D/F12	Adherent
TT2609-C02	1240223	Y	Y	Y	Y	Y	thyroid	thyroid	THCA	MSS/MSI-L	R	Adherent
5637	687452	Y	Y	Y	Y	Y	urogenital_system	Bladder	BLCA	MSS/MSI-L	R	Adherent
639-V	906798	Y	Y	Y	Y	Y	urogenital_system	Bladder	BLCA	MSS/MSI-L	D/F12	Adherent
647-V	906797	Y	Y	Y	Y	Y	urogenital_system	Bladder	BLCA	MSS/MSI-L	D/F12	Adherent
BFTC-905	910926	Y	Y	Y	Y	Y	urogenital_system	Bladder	BLCA	MSS/MSI-L	D/F12	Adherent
CAL-29	1290730	Y	Y	Y	Y	Y	urogenital_system	Bladder	BLCA	MSS/MSI-L	D/F12	Adherent
DSH1	753552	Y	Y	Y	Y	Y	urogenital_system	Bladder	BLCA	MSS/MSI-L	R	Adherent
HT-1197	907065	Y	Y	Y	Y	Y	urogenital_system	Bladder	BLCA	MSS/MSI-L	D/F12	Adherent
HT-1376	907066	Y	Y	Y	Y	Y	urogenital_system	Bladder	BLCA	MSS/MSI-L	D/F12	Adherent
J82	753566	Y	Y	Y	Y	Y	urogenital_system	Bladder	BLCA	MSS/MSI-L	D/F12	Adherent
KU-19-19	907312	Y	Y	Y	Y	Y	urogenital_system	Bladder	BLCA	MSS/MSI-L	R	Adherent
LB831-BLC	753584	Y	Y	Y	Y	Y	urogenital_system	Bladder	BLCA	MSS/MSI-L	D/F12	Adherent
RT-112	909704	Y	Y	Y	Y	Y	urogenital_system	Bladder	BLCA	MSS/MSI-L	R	Adherent
RT4	687455	Y	Y	Y	Y	Y	urogenital_system	Bladder	BLCA	MSS/MSI-L	D/F12	Adherent
SW1710	909749	Y	Y	Y	Y	Y	urogenital_system	Bladder	BLCA	MSS/MSI-L	D/F12	Adherent
SW780	687457	Y	Y	Y	Y	Y	urogenital_system	Bladder	BLCA	MSS/MSI-L	D/F12	Adherent
T-24	724812	Y	Y	Y	Y	Y	urogenital_system	Bladder	BLCA	MSS/MSI-L	D/F12	Adherent
TCCSUP	687459	Y	Y	Y	Y	Y	urogenital_system	Bladder	BLCA	MSS/MSI-L	D/F12	Adherent
UM-UC-3	724838	Y	Y	Y	Y	Y	urogenital_system	Bladder	BLCA	MSS/MSI-L	D/F12	Adherent
VM-CUB-1	909780	Y	Y	Y	Y	Y	urogenital_system	Bladder	BLCA	MSS/MSI-L	D/F12	Adherent
C-33-A	687505	Y	Y	Y	Y	Y	urogenital_system	cervix	CESC	MSI-H	D/F12	Adherent
C-4-I	687506	Y	Y	Y	Y	Y	urogenital_system	cervix	CESC	MSS/MSI-L	D/F12	Adherent
CAL-39	924107	Y	Y	Y	Y	Y	urogenital_system	cervix	CESC	MSS/MSI-L	D/F12	Adherent
Ca-Ski	906824	Y	Y	Y	Y	Y	urogenital_system	cervix	CESC	MSS/MSI-L	R	Adherent
DoTc2-4510	906843	Y	Y	Y	Y	Y	urogenital_system	cervix	CESC	MSS/MSI-L	D/F12	Adherent
HeLa	1298134	Y	Y	Y	Y	Y	urogenital_system	cervix	CESC	MSS/MSI-L	D/F12	Adherent
HT-3	907068	Y	Y	Y	Y	Y	urogenital_system	cervix	CESC	MSS/MSI-L	R	Adherent
ME-180	687514	Y	Y	Y	Y	Y	urogenital_system	cervix	CESC	MSS/MSI-L	D/F12	Adherent
MS751	1240179	Y	Y	Y	Y	Y	urogenital_system	cervix	CESC	MSS/MSI-L	D/F12	Adherent
SiHa	930297	Y	Y	Y	Y	Y	urogenital_system	cervix	CESC	MSS/MSI-L	D/F12	Adherent
SISO	1240212	Y	Y	Y	Y	Y	urogenital_system	cervix	CESC	MSS/MSI-L	R	Adherent
SKG-IIIa	930298	Y	Y	Y	Y	Y	urogenital_system	cervix	CESC	MSS/MSI-L	D/F12	Adherent
SW756	724839	Y	Y	Y	Y	Y	urogenital_system	cervix	CESC	MSS/MSI-L	D/F12	Adherent
TC-YIK	946357	Y	Y	Y	Y	Y	urogenital_system	cervix		MSS/MSI-L	R	Suspension
AN3-CA	910781	Y	Y	Y	Y	Y	urogenital_system	endometrium	UCEC	MSI-H	D/F12	Adherent
COLO-684	910691	Y	Y	Y	Y	Y	urogenital_system	endometrium	UCEC	MSI-H	R	Suspension
EN	1240127	Y	Y	Y	Y	Y	urogenital_system	endometrium	UCEC	MSS/MSI-L	R	Adherent
ESS-1	907000	Y	Y	Y	Y	Y	urogenital_system	endometrium		MSS/MSI-L	R	Adherent
HEC-1	907051	Y	Y	Y	Y	Y	urogenital_system	endometrium	UCEC	MSI-H	D/F12	Adherent
KLE	924187	Y	Y	Y	Y	Y	urogenital_system	endometrium	UCEC	MSS/MSI-L	D/F12	Adherent
MFE-280	908129	Y	Y	Y	Y	Y	urogenital_system	endometrium	UCEC	MSS/MSI-L	D/F12	Adherent
MFE-296	908130	Y	Y	Y	Y	Y	urogenital_system	endometrium	UCEC	MSI-H	D/F12	Adherent
MFE-319	1240174	Y	Y	Y	Y	Y	urogenital_system	endometrium	UCEC	MSI-H	D/F12	Adherent
SNG-M	909735	Y	Y	Y	Y	Y	urogenital_system	endometrium	UCEC	MSI-H	D/F12	Adherent
A2780	906804	Y	Y	Y	Y	Y	urogenital_system	ovary	UNABLE TO CLASSIFY	MSS/MSI-L	R	Semi-Adherent
Caov-4	949090	Y	Y	Y	Y	Y	urogenital_system	ovary	OV	MSS/MSI-L	D/F12	Adherent
EFO-21	911905	Y	Y	Y	Y	Y	urogenital_system	ovary	OV	MSS/MSI-L	R	Adherent
EFO-27	906852	Y	Y	Y	Y	Y	urogenital_system	ovary		MSI-H	R	Adherent
ES-2	1240128	Y	Y	Y	Y	Y	urogenital_system	ovary		MSS/MSI-L	R	Adherent
FU-OV-1	1240129	Y	Y	Y	Y	Y	urogenital_system	ovary	OV	MSS/MSI-L	D/F12	Adherent
IGROV-1	905968	Y	Y	Y	Y	Y	urogenital_system	ovary	OV	MSI-H	R	Adherent
JHOS-2	1479995	Y	Y	Y	Y	Y	urogenital_system	ovary	OV	MSS/MSI-L	D/F12	Adherent
JHOS-3	1480358	Y	Y	Y	Y	Y	urogenital_system	ovary	OV	MSS/MSI-L	D/F12	Adherent
JHOS-4	1480359	Y	Y	Y	Y	Y	urogenital_system	ovary	OV	MSS/MSI-L	D/F12	Adherent
KGN	924186	Y	Y	Y	Y	Y	urogenital_system	ovary		MSS/MSI-L	D/F12	Adherent
KURAMOCHI	909975	Y	Y	Y	Y	Y	urogenital_system	ovary	UNABLE TO CLASSIFY	MSS/MSI-L	R	Adherent
OAW-28	946360	Y	Y	Y	Y	Y	urogenital_system	ovary	OV	MSS/MSI-L	D/F12	Adherent
OAW-42	910548	Y	Y	Y	Y	Y	urogenital_system	ovary	OV	MSS/MSI-L	D/F12	Adherent
OC-314	909257	Y	Y	Y	Y	Y	urogenital_system	ovary	OV	MSI-H	R	Adherent
OV-17R	1480361	Y	Y	Y	Y	Y	urogenital_system	ovary	OV	MSS/MSI-L	D/F12	Adherent
OV-56	1480362	Y	Y	Y	Y	Y	urogenital_system	ovary	OV	MSS/MSI-L	D/F12	Adherent
OV-7	1480360	Y	Y	Y	Y	Y	urogenital_system	ovary	OV	MSS/MSI-L	D/F12	Adherent
OV-90	1240197	Y	Y	Y	Y	Y	urogenital_system	ovary	OV	MSS/MSI-L	D/F12	Adherent
OVCA420	1480364	Y	Y	Y	Y	Y	urogenital_system	ovary	OV	MSS/MSI-L	D/F12	Adherent
OVCAR-3	905933	Y	Y	Y	Y	Y	urogenital_system	ovary	OV	MSS/MSI-L	R	Adherent
OVCAR-4	905990	Y	Y	Y	Y	Y	urogenital_system	ovary	OV	MSS/MSI-L	R	Adherent
OVCAR-5	905969	Y	Y	Y	Y	Y	urogenital_system	ovary	OV	MSS/MSI-L	R	Adherent
OVCAR-8	905991	Y	Y	Y	Y	Y	urogenital_system	ovary	OV	MSS/MSI-L	R	Adherent
OVISE	1240198	Y	Y	Y	Y	Y	urogenital_system	ovary	OV	MSS/MSI-L	R	Adherent
OVK-18	1480371	Y	Y	Y	Y	Y	urogenital_system	ovary	OV	MSI-H	D/F12	Adherent
OVKATE	1240199	Y	Y	Y	Y	Y	urogenital_system	ovary	OV	MSS/MSI-L	R	Adherent
OVMIU	1240200	Y	Y	Y	Y	Y	urogenital_system	ovary	OV	MSS/MSI-L	R	Adherent
OVTOKO	1298365	Y	Y	Y	Y	Y	urogenital_system	ovary	OV	MSS/MSI-L	R	Adherent
PA-1	909255	Y	Y	Y	Y	Y	urogenital_system	ovary		MSS/MSI-L	D/F12	Adherent
PEO1	1480372	Y	Y	Y	Y	Y	urogenital_system	ovary	OV	MSS/MSI-L	R	Adherent
RKN	1298539	Y	Y	Y	Y	Y	urogenital_system	ovary		MSS/MSI-L	D/F12	Adherent
RMG-I	909699	Y	Y	Y	Y	Y	urogenital_system	ovary		MSS/MSI-L	D/F12	Adherent
SK-OV-3	905959	Y	Y	Y	Y	Y	urogenital_system	ovary	OV	MSI-H	R	Adherent
SW626	909753	Y	Y	Y	Y	Y	urogenital_system	ovary	OV	MSS/MSI-L	D/F12	Adherent
TOV-112D	1299070	Y	Y	Y	Y	Y	urogenital_system	ovary	OV	MSS/MSI-L	D/F12	Adherent
TOV-21G	1240222	Y	Y	Y	Y	Y	urogenital_system	ovary	OV	MSI-H	D/F12	Adherent
TYK-nu	909774	Y	Y	Y	Y	Y	urogenital_system	ovary	UNABLE TO CLASSIFY	MSS/MSI-L	D/F12	Adherent
UWB1.289	1480374	Y	Y	Y	Y	Y	urogenital_system	ovary	OV	MSS/MSI-L	D/F12	Adherent
22RV1	924100	Y	Y	Y	Y	Y	urogenital_system	prostate	PRAD	MSI-H	R	Adherent
BPH-1	924105	Y	Y	Y	Y	Y	urogenital_system	prostate		MSS/MSI-L	R	Adherent
DU-145	905935	Y	Y	Y	Y	Y	urogenital_system	prostate	PRAD	MSI-H	D/F12	Adherent
LNCaP-Clone-FGC	907788	Y	Y	Y	Y	Y	urogenital_system	prostate	PRAD	MSI-H	R	Adherent
PC-3	905934	Y	Y	Y	Y	Y	urogenital_system	prostate	PRAD	MSS/MSI-L	D/F12	Adherent
PWR-1E	1330993	Y	Y	Y	Y	Y	urogenital_system	prostate	PRAD	MSS/MSI-L	D/F12	Adherent
VCaP	1299075	Y	Y	Y	Y	Y	urogenital_system	prostate	PRAD	MSS/MSI-L	D/F12	Adherent
NCCIT	908441	Y	Y	Y	Y	N	urogenital_system	testis		MSS/MSI-L	R	Adherent
NEC8	910942	Y	Y	Y	Y	Y	urogenital_system	testis		MSS/MSI-L	R	Adherent
NTERA-2 cl.D1	908454	Y	Y	Y	Y	Y	urogenital_system	testis		MSS/MSI-L	D/F12	Adherent
JAR	907175	Y	Y	Y	Y	Y	urogenital_system	urogenital_system_other		MSS/MSI-L	R	Adherent
JEG-3	907176	Y	Y	Y	Y	Y	urogenital_system	urogenital_system_other		MSS/MSI-L	D/F12	Adherent
SW954	924247	Y	Y	Y	Y	Y	urogenital_system	urogenital_system_other		MSS/MSI-L	D/F12	Adherent
SW962	909758	Y	Y	Y	Y	Y	urogenital_system	urogenital_system_other		MSS/MSI-L	D/F12	Adherent
MES-SA	908127	Y	Y	Y	Y	Y	urogenital_system	uterus		MSS/MSI-L	R	Adherent
SKN	1240215	Y	Y	Y	Y	Y	urogenital_system	uterus		MSS/MSI-L	D/F12	Adherent
DMS-79	753551	Y	Y	Y	Y	Y	lung_SCLC	lung_small_cell_carcinoma	SCLC		R	Suspension
CMK	910566	Y	Y	Y	N	Y	leukemia	acute_myeloid_leukaemia	LAML	MSS/MSI-L	R	Suspension
NB-4	1323913	Y	Y	Y	N	Y	leukemia	acute_myeloid_leukaemia	LAML	MSS/MSI-L	R	Suspension
MHH-CALL-4	908133	Y	Y	Y	Y	N	leukemia	B_cell_leukemia		MSS/MSI-L	R	Suspension
BC-3	910918	Y	Y	N	Y	Y	lymphoma	B_cell_lymphoma	DLBC	MSS/MSI-L	R	Suspension
HT	907063	Y	Y	N	Y	Y	lymphoma	B_cell_lymphoma	DLBC	MSI-H	R	Suspension
JM1	1327768	Y	Y	Y	N	Y	lymphoma	B_cell_lymphoma	DLBC	MSS/MSI-L	D/F12	Suspension
BONNA-12	906695	Y	Y	Y	Y	N	leukemia	hairy_cell_leukaemia		MSS/MSI-L	R	Suspension
ES6	949157	Y	Y	Y	N	Y	bone	ewings_sarcoma		MSS/MSI-L	R	Adherent
MHH-ES-1	908134	Y	Y	N	Y	Y	bone	ewings_sarcoma		MSS/MSI-L	R	Adherent
DIFI	1789883	Y	Y	N	Y	Y	large_intestine	large_intestine	COAD/READ	MSS/MSI-L	D/F12	Adherent
NCI-H508	908442	Y	Y	N	Y	Y	large_intestine	large_intestine	COAD/READ	MSS/MSI-L	R	Semi-Adherent
SNU-283	1659929	Y	Y	Y	Y	N	large_intestine	large_intestine	COAD/READ	MSS/MSI-L	R	Adherent
SW620	905962	Y	Y	Y	N	Y	large_intestine	large_intestine	COAD/READ	MSS/MSI-L	D/F12	Adherent
JHH-2	1240157	Y	N	Y	Y	Y	digestive_system	liver	LIHC	MSS/MSI-L	D/F12	Adherent
JHH-4	1240158	Y	N	Y	Y	Y	digestive_system	liver	LIHC	MSS/MSI-L	D/F12	Adherent
RCC-JF	1524415	Y	Y	Y	N	Y	kidney	kidney	KIRC	MSS/MSI-L	D/F12	Adherent
SW156	1240220	Y	N	Y	Y	Y	kidney	kidney	KIRC	MSS/MSI-L	D/F12	Adherent
HOP-62	905972	Y	Y	Y	N	Y	lung_NSCLC	lung_NSCLC_adenocarcinoma	LUAD	MSS/MSI-L	R	Adherent
NCI-H1437	687794	Y	Y	N	Y	Y	lung_NSCLC	lung_NSCLC_adenocarcinoma	LUAD	MSS/MSI-L	R	Adherent
PC-3 [JPC-3]	1240202	Y	Y	Y	N	Y	lung_NSCLC	lung_NSCLC_adenocarcinoma	LUAD	MSS/MSI-L	D/F12	Adherent
NCI-H740	1331055	Y	Y	Y	Y	N	lung_SCLC	lung_small_cell_carcinoma	SCLC	MSS/MSI-L	R	Suspension
COR-L95	1297439	Y	Y	Y	N	Y	lung_SCLC	lung_small_cell_carcinoma	SCLC	MSS/MSI-L	R	Adherent
HCC-33	1303901	Y	Y	N	Y	Y	lung_SCLC	lung_small_cell_carcinoma	SCLC	MSS/MSI-L	R	Adherent
NCI-H128	753597	Y	Y	N	Y	Y	lung_SCLC	lung_small_cell_carcinoma	SCLC	MSS/MSI-L	R	Suspension
NCI-H1304	753599	Y	Y	Y	N	Y	lung_SCLC	lung_small_cell_carcinoma	SCLC	MSS/MSI-L	D/F12	Suspension
NCI-H2081	908480	Y	Y	N	Y	Y	lung_SCLC	lung_small_cell_carcinoma	SCLC	MSS/MSI-L	D/F12	Suspension
NCI-H2171	688015	Y	Y	N	Y	Y	lung_SCLC	lung_small_cell_carcinoma	SCLC	MSS/MSI-L	D/F12	Suspension
SHP-77	724872	Y	Y	Y	N	Y	lung_SCLC	lung_small_cell_carcinoma	SCLC	MSS/MSI-L	R	Semi-Adherent
SW1271	1299062	Y	Y	Y	N	Y	lung_SCLC	lung_small_cell_carcinoma	SCLC	MSS/MSI-L	D/F12	Adherent
D-423MG	946372	Y	Y	Y	N	Y	nervous_system	glioma	GBM	MSS/MSI-L	D/F12	Adherent
KP-N-RT-BM-1	924189	Y	Y	N	Y	Y	neuroblastoma	neuroblastoma	NB	MSS/MSI-L	R	Semi-Adherent
KP-N-YS	946363	Y	Y	N	Y	Y	neuroblastoma	neuroblastoma	NB	MSS/MSI-L	R	Adherent
MC-IXC	908118	Y	Y	N	Y	Y	neuroblastoma	neuroblastoma	NB	MSS/MSI-L	D/F12	Adherent
COLO-783	1240125	Y	Y	Y	N	Y	skin	melanoma	SKCM	MSS/MSI-L	R	Adherent
CP67-MEL	949092	Y	Y	N	Y	Y	skin	melanoma	SKCM	MSS/MSI-L	D/F12	Adherent
Hs633T	1240149	Y	N	Y	Y	Y	soft_tissue	fibrosarcoma		MSS/MSI-L	D/F12	Adherent
KMH-2	1298167	Y	Y	N	Y	Y	thyroid	thyroid	THCA	MSS/MSI-L	R	Adherent
OMC-1	949154	Y	Y	N	Y	Y	urogenital_system	cervix	CESC	MSS/MSI-L	D/F12	Adherent
RL95-2	930082	Y	Y	Y	N	Y	urogenital_system	endometrium		MSI-H	D/F12	Adherent
Caov-3	906825	Y	Y	N	Y	Y	urogenital_system	ovary	OV	MSS/MSI-L	D/F12	Adherent
DOV13	1479987	Y	Y	Y	N	Y	urogenital_system	ovary	OV	MSS/MSI-L	D/F12	Adherent
Hey	1479988	Y	Y	Y	N	Y	urogenital_system	ovary	OV	MSS/MSI-L	R	Adherent
NCI-H660	1330975	Y	Y	Y	Y	N	urogenital_system	prostate		MSS/MSI-L	D/F12	Suspension
JHU-029	1298156	Y	Y	Y	N	Y	aero_dig_tract	head and neck	HNSC		R	Adherent
SCC90	1299052	Y	Y	Y	N	Y	aero_dig_tract	head and neck	HNSC		R	Adherent
MOLM-16	1330948	Y	Y	Y	N	Y	leukemia	acute_myeloid_leukaemia	LAML		R	Suspension
OCI-LY7	1659819	Y	Y	Y	N	Y	lymphoma	B_cell_lymphoma	DLBC		D/F12	Suspension
KMS-11	1659817	Y	Y	Y	N	Y	myeloma	myeloma	MM		R	Suspension
CHSA0011	1290767	Y	Y	Y	N	Y	bone	chondrosarcoma			R	Adherent
CHSA0108	1290768	Y	Y	Y	N	Y	bone	chondrosarcoma			R	Adherent
JIMT-1	1298157	Y	Y	Y	N	Y	breast	breast	BRCA		D/F12	Adherent
CL-34	1290771	Y	Y	Y	N	Y	large_intestine	large_intestine	COAD/READ		D/F12	Adherent
VMRC-LCD	713869	Y	Y	Y	N	Y	lung_NSCLC	lung_NSCLC_adenocarcinoma	LUAD		D/F12	Adherent
K2	1298160	Y	Y	Y	N	Y	skin	melanoma	SKCM		D/F12	Adherent
STS-0421	1299061	Y	Y	Y	N	Y	soft_tissue	soft_tissue_other			R	Adherent
MY-M12	1330960	Y	Y	N	N	Y	leukemia	leukemia	ALL	MSS/MSI-L	R	Suspension
TALL-1	909762	Y	Y	N	N	Y	leukemia	lymphoblastic_T_cell_leukaemia	ALL	MSS/MSI-L	R	Suspension
NK-92MI	1330981	Y	Y	N	N	Y	lymphoma	lymphoid_neoplasm other		MSS/MSI-L	D/F12	Suspension
MDA-MB-175-VII	908120	Y	Y	N	N	Y	breast	breast	BRCA	MSS/MSI-L	D/F12	Adherent
YMB-1-E	1303911	Y	Y	N	N	Y	breast	breast	BRCA	MSS/MSI-L	R	Adherent
VMRC-RCW	1240224	Y	Y	N	N	Y	kidney	kidney	KIRC	MSS/MSI-L	R	Adherent
NCI-H460	905943	Y	Y	N	N	Y	lung_NSCLC	lung_NSCLC_large cell		MSS/MSI-L	R	Adherent
RERF-LC-FM	930081	Y	Y	N	Y	N	lung_SCLC	lung_small_cell_carcinoma	SCLC	MSS/MSI-L	R	Suspension
D-245MG	946366	Y	Y	N	Y	N	nervous_system	glioma	GBM	MSS/MSI-L	D/F12	Adherent
Hs939-T	1298144	Y	Y	N	N	Y	skin	melanoma	SKCM	MSS/MSI-L	D/F12	Adherent
VMRC-MELG	930301	Y	Y	N	N	Y	skin	melanoma	SKCM	MSS/MSI-L	D/F12	Adherent
OVCA433	1480367	Y	Y	N	N	Y	urogenital_system	ovary	OV	MSS/MSI-L	D/F12	Adherent
TMK-1	1299069	Y	Y	N	N	Y	digestive_system	stomach	STAD		R	Adherent
KP-2	1298218	Y	N	Y	N	Y	pancreas	pancreas	PAAD		D/F12	Adherent
KO52	1330932	Y	Y	N	N	N	leukemia	acute_myeloid_leukaemia	LAML	MSS/MSI-L	D/F12	NA
SC-1	1331030	Y	Y	N	N	N	lymphoma	B_cell_lymphoma	DLBC	MSS/MSI-L	R	NA
U-CH2	1503373	Y	Y	N	N	N	bone	bone_other		MSS/MSI-L	D/F12	Adherent
TOTAL:		1001	996	968	957	990

## Sheet: COSMIC tissue classification
Line	COSMIC_ID	Site	Histology
NCI-H522	905944	lung	carcinoma
Mewo	908128	skin	malignant_melanoma
C2BBe1	910700	large_intestine	carcinoma
HCC1428	1290905	breast	carcinoma
COR-L95	1297439	lung	carcinoma
Ca9-22	753538	upper_aerodigestive_tract	carcinoma
NCI-H747	908457	large_intestine	carcinoma
D-245MG	946366	central_nervous_system	glioma
JIMT-1	1298157	breast	carcinoma
OVISE	1240198	ovary	carcinoma
JHOS-3	1480358	ovary	carcinoma
SHP-77	724872	lung	carcinoma
COLO-824	906812	breast	carcinoma
DOHH-2	906842	haematopoietic_and_lymphoid_tissue	lymphoid_neoplasm
COLO-684	910691	endometrium	carcinoma
JM1	1327768	haematopoietic_and_lymphoid_tissue	lymphoid_neoplasm
SUP-T1	909743	haematopoietic_and_lymphoid_tissue	lymphoid_neoplasm
SW48	909751	large_intestine	carcinoma
HCC1143	749710	breast	carcinoma
RF-48	909697	stomach	carcinoma
BT-549	905951	breast	carcinoma
T84	909761	large_intestine	carcinoma
ACN	906803	autonomic_ganglia	neuroblastoma
MRK-nu-1	908151	breast	carcinoma
WM-115	909784	skin	malignant_melanoma
SK-NEP-1	909730	kidney	Wilms_tumour
786-0	905947	kidney	carcinoma
SK-MEL-2	905955	skin	malignant_melanoma
ME-180	687514	cervix	carcinoma
LB373-MEL-D	753581	skin	malignant_melanoma
HCC1806	907047	breast	carcinoma
SK-MG-1	909729	central_nervous_system	glioma
HCC1395	749712	breast	carcinoma
NCI-H596	908459	lung	carcinoma
SC-1	1331030	haematopoietic_and_lymphoid_tissue	lymphoid_neoplasm
CML-T1	910951	haematopoietic_and_lymphoid_tissue	haematopoietic_neoplasm
NCI-H146	910899	lung	carcinoma
HDLM-2	924110	haematopoietic_and_lymphoid_tissue	lymphoid_neoplasm
COR-L105	906805	lung	carcinoma
NCI-H2444	1298356	lung	carcinoma
NCI-H1836	1240182	lung	carcinoma
JiyoyeP-2003	907268	haematopoietic_and_lymphoid_tissue	lymphoid_neoplasm
KNS-62	753569	lung	carcinoma
MHH-CALL-2	908132	haematopoietic_and_lymphoid_tissue	lymphoid_neoplasm
SBC-1	713885	lung	carcinoma
SUIT-2	1240219	pancreas	carcinoma
WM1552C	1299078	skin	malignant_melanoma
OVCAR-3	905933	ovary	carcinoma
KYSE-150	907317	oesophagus	carcinoma
MN-60	908143	haematopoietic_and_lymphoid_tissue	lymphoid_neoplasm
TC-YIK	946357	cervix	carcinoma
MOLM-13	1330947	haematopoietic_and_lymphoid_tissue	haematopoietic_neoplasm
NB13	949177	autonomic_ganglia	neuroblastoma
NCI-H2030	722045	lung	carcinoma
RERF-LC-KJ	1298537	lung	carcinoma
D-283MED	906834	central_nervous_system	primitive_neuroectodermal_tumour-medulloblastoma
SW1417	909747	large_intestine	carcinoma
TGBC1TKB	909769	biliary_tract	carcinoma
OAW-42	910548	ovary	carcinoma
BL-70	910707	haematopoietic_and_lymphoid_tissue	lymphoid_neoplasm
NB7	949174	autonomic_ganglia	neuroblastoma
COLO-679	906818	skin	malignant_melanoma
OVCA420	1480364	ovary	carcinoma
HH	907056	haematopoietic_and_lymphoid_tissue	lymphoid_neoplasm
NB14	949178	autonomic_ganglia	neuroblastoma
LNCaP-Clone-FGC	907788	prostate	carcinoma
SU-DHL-1	909742	haematopoietic_and_lymphoid_tissue	lymphoid_neoplasm
LS-1034	917486	large_intestine	carcinoma
LS-411N	907794	large_intestine	carcinoma
KYSE-70	753576	oesophagus	carcinoma
LB1047-RCC	753577	kidney	carcinoma
SW982	909759	soft_tissue	synovial_sarcoma
KP-3	1298219	pancreas	carcinoma
KP-N-YN	907314	autonomic_ganglia	neuroblastoma
H2810	1240137	pleura	mesothelioma
U-118-MG	687588	central_nervous_system	glioma
NCI-H3122	1240190	lung	carcinoma
TE-441-T	924248	soft_tissue	rhabdomyosarcoma
MHH-CALL-4	908133	haematopoietic_and_lymphoid_tissue	lymphoid_neoplasm
MKN1	908138	stomach	carcinoma
M059J	949094	central_nervous_system	glioma
SK-LU-1	909721	lung	carcinoma
LU-139	713878	lung	carcinoma
HSC-2	753562	upper_aerodigestive_tract	carcinoma
HCC70	907048	breast	carcinoma
P31-FUJ	909253	haematopoietic_and_lymphoid_tissue	haematopoietic_neoplasm
NB12	949172	autonomic_ganglia	neuroblastoma
RCC-JW	1524416	kidney	carcinoma
WSU-DLCL2	1331050	haematopoietic_and_lymphoid_tissue	lymphoid_neoplasm
NCI-H209	688013	lung	carcinoma
IST-SL1	753564	lung	carcinoma
ALL-SIL	1295740	haematopoietic_and_lymphoid_tissue	lymphoid_neoplasm
HUTU-80	907073	small_intestine	carcinoma
A204	910784	soft_tissue	rhabdomyosarcoma
SW780	687457	urinary_tract	carcinoma
Calu-3	687777	lung	carcinoma
LB647-SCLC	753582	lung	carcinoma
MFH-ino	925343	soft_tissue	malignant_fibrous_histiocytoma-pleomorphic_sarcoma
CAL-33	753541	upper_aerodigestive_tract	carcinoma
TALL-1	909762	haematopoietic_and_lymphoid_tissue	lymphoid_neoplasm
OCUM-1	1298358	stomach	carcinoma
BCPAP	924104	thyroid	carcinoma
SCC90	1299052	upper_aerodigestive_tract	carcinoma
NCI-H226	905941	lung	carcinoma
KM12	905989	large_intestine	carcinoma
KYSE-180	907318	oesophagus	carcinoma
COLO-800	906813	skin	malignant_melanoma
ABC-1	906791	lung	carcinoma
NK-92MI	1330981	haematopoietic_and_lymphoid_tissue	lymphoid_neoplasm
PANC-10-05	925348	pancreas	carcinoma
SW837	909755	large_intestine	carcinoma
SU-DHL-5	1331036	haematopoietic_and_lymphoid_tissue	lymphoid_neoplasm
CP50-MEL-B	753545	skin	malignant_melanoma
SW1463	909748	large_intestine	carcinoma
SN12C	905979	kidney	carcinoma
NCI-H526	688025	lung	carcinoma
MCF7	905946	breast	carcinoma
Malme-3M	905953	skin	malignant_melanoma
NCI-H661	687829	lung	carcinoma
NCI-H510A	753605	lung	carcinoma
A375	906793	skin	malignant_melanoma
LU-134-A	753588	lung	carcinoma
CHSA0108	1290768	bone	chondrosarcoma
NCC021	1509074	kidney	carcinoma
HL-60	905938	haematopoietic_and_lymphoid_tissue	haematopoietic_neoplasm
L-1236	1330935	haematopoietic_and_lymphoid_tissue	lymphoid_neoplasm
NCI-H2066	1330973	lung	carcinoma
HT	907063	haematopoietic_and_lymphoid_tissue	lymphoid_neoplasm
SNU-182	1240216	liver	carcinoma
D-336MG	946369	central_nervous_system	glioma
HCC1599	749713	breast	carcinoma
H2373	1290809	pleura	mesothelioma
NCI-H660	1330975	prostate	carcinoma
GRANTA-519	1303897	haematopoietic_and_lymphoid_tissue	lymphoid_neoplasm
HOP-62	905972	lung	carcinoma
NCI-H1838	687807	lung	carcinoma
H2595	1240132	pleura	mesothelioma
DG-75	906838	haematopoietic_and_lymphoid_tissue	lymphoid_neoplasm
NCI-H1563	753600	lung	carcinoma
DND-41	1297446	haematopoietic_and_lymphoid_tissue	lymphoid_neoplasm
STS-0421	1299061	soft_tissue	NS
KMRC-20	1298169	kidney	carcinoma
NCI-H1666	908473	lung	carcinoma
LXF-289	753592	lung	carcinoma
RCC-MF	1524419	kidney	carcinoma
UMC-11	909779	lung	carcinoid-endocrine_tumour
OVCA433	1480367	ovary	carcinoma
MDST8	1240173	large_intestine	carcinoma
EMC-BAC-1	1503369	lung	carcinoma
CCK-81	1240123	large_intestine	carcinoma
5637	687452	urinary_tract	carcinoma
IST-SL2	753565	lung	carcinoma
PE/CA-PJ15	1240207	upper_aerodigestive_tract	carcinoma
MC-IXC	908118	autonomic_ganglia	neuroblastoma
BICR78	1240122	upper_aerodigestive_tract	carcinoma
DOK	910936	upper_aerodigestive_tract	other
ROS-50	1331025	haematopoietic_and_lymphoid_tissue	lymphoid_neoplasm
ECC10	906848	stomach	carcinoma
HT-144	907067	skin	malignant_melanoma
COR-L279	910937	lung	carcinoma
NCI-H2087	724834	lung	carcinoma
KP-1N	1298216	pancreas	carcinoma
CAL-27	910916	upper_aerodigestive_tract	carcinoma
NB5	949176	autonomic_ganglia	neuroblastoma
LU-99A	907796	lung	carcinoma
HuO9	907072	bone	osteosarcoma
NCI-H1341	1330964	lung	carcinoma
OSC-19	1298362	upper_aerodigestive_tract	carcinoma
HuP-T4	907286	pancreas	carcinoma
REH	909696	haematopoietic_and_lymphoid_tissue	lymphoid_neoplasm
IMR-5	907170	autonomic_ganglia	neuroblastoma
CP66-MEL	753546	skin	malignant_melanoma
KG-1	907278	haematopoietic_and_lymphoid_tissue	haematopoietic_neoplasm
U251	905983	central_nervous_system	glioma
NCI-H1793	908463	lung	carcinoma
U-2-OS	909776	bone	osteosarcoma
TT	930299	thyroid	carcinoma
YH-13	909905	central_nervous_system	glioma
OVCAR-8	905991	ovary	carcinoma
SF126	909712	central_nervous_system	glioma
NCI-H2196	908481	lung	carcinoma
COR-L321	1322213	NS	NS
NCI-H1573	908472	lung	carcinoma
HCC202	1290906	breast	carcinoma
Hs633T	1240149	soft_tissue	fibrosarcoma
NCI-H2110	1298351	lung	carcinoma
EMC-BAC-2	1503370	lung	carcinoma
BC-3	910918	haematopoietic_and_lymphoid_tissue	lymphoid_neoplasm
WIL2-NS	1331049	haematopoietic_and_lymphoid_tissue	lymphoid_neoplasm
ES1	949158	bone	Ewings_sarcoma-peripheral_primitive_neuroectodermal_tumour
HCT-15	905937	large_intestine	carcinoma
OUMS-23	1298363	large_intestine	carcinoma
PA-1	909255	ovary	germ_cell_tumour
OCI-AML2	910947	haematopoietic_and_lymphoid_tissue	haematopoietic_neoplasm
OV-7	1480360	ovary	carcinoma
A4-Fuk	910934	haematopoietic_and_lymphoid_tissue	lymphoid_neoplasm
KYSE-30	1298221	oesophagus	carcinoma
KMH-2	1298167	thyroid	carcinoma
SCH	909711	stomach	other
JAR	907175	placenta	choriocarcinoma
PCI-15A	1240204	upper_aerodigestive_tract	carcinoma
NCI-H1963	688010	lung	carcinoma
NCI-H1693	687802	lung	carcinoma
NCI-H2171	688015	lung	carcinoma
EW-22	949167	bone	Ewings_sarcoma-peripheral_primitive_neuroectodermal_tumour
SK-OV-3	905959	ovary	carcinoma
LIM1215	2162949	large_intestine	carcinoma
CHSA8926	1303912	bone	chondrosarcoma
DMS-79	753551	lung	carcinoma
SK-CO-1	909718	large_intestine	carcinoma
BICR31	1290725	upper_aerodigestive_tract	carcinoma
ATN-1	910687	haematopoietic_and_lymphoid_tissue	lymphoid_neoplasm
SK-UT-1	909732	soft_tissue	leiomyosarcoma
GAMG	906868	central_nervous_system	glioma
NCI-SNU-5	908445	stomach	carcinoma
TE-15	753614	oesophagus	carcinoma
SNU-175	1659928	large_intestine	carcinoma
A427	910851	lung	carcinoma
BT-20	906801	breast	carcinoma
NCI-H1703	908474	lung	carcinoma
HCC2218	749716	breast	carcinoma
C-33-A	687505	cervix	carcinoma
H9	907043	haematopoietic_and_lymphoid_tissue	lymphoid_neoplasm
SUP-M2	1331040	haematopoietic_and_lymphoid_tissue	lymphoid_neoplasm
HCC-33	1303901	lung	carcinoma
NCI-H1155	908467	lung	carcinoma
NCI-H1435	1298347	lung	carcinoma
EW-11	684062	bone	Ewings_sarcoma-peripheral_primitive_neuroectodermal_tumour
U031	905981	kidney	carcinoma
RPMI-6666	909701	haematopoietic_and_lymphoid_tissue	lymphoid_neoplasm
OVK-18	1480371	ovary	carcinoma
C-4-I	687506	cervix	carcinoma
H2804	1240136	pleura	mesothelioma
NCI-H2135	1298352	lung	carcinoma
NCI-H1648	687799	lung	carcinoma
SK-MES-1	909728	lung	carcinoma
PCI-30	1298529	upper_aerodigestive_tract	carcinoma
SU-DHL-8	1331038	NS	NS
MMAC-SF	925339	skin	malignant_melanoma
Daoy	906833	central_nervous_system	primitive_neuroectodermal_tumour-medulloblastoma
H3255	1247873	lung	carcinoma
VMRC-LCD	713869	lung	carcinoma
RCC-FG2	1524414	kidney	carcinoma
RPMI-2650	909700	upper_aerodigestive_tract	carcinoma
KYSE-50	1298222	oesophagus	carcinoma
JHH-1	1298151	liver	carcinoma
HAL-01	949153	haematopoietic_and_lymphoid_tissue	lymphoid_neoplasm
NCI-H2085	687812	lung	carcinoma
BONNA-12	906695	haematopoietic_and_lymphoid_tissue	lymphoid_neoplasm
Mo-T	908149	haematopoietic_and_lymphoid_tissue	lymphoid_neoplasm
NCI-H1755	908475	lung	carcinoma
T47D	905945	breast	carcinoma
NCI-N87	908461	stomach	carcinoma
BT-474	946359	breast	carcinoma
SISO	1240212	cervix	carcinoma
EGI-1	906853	biliary_tract	carcinoma
HLE	907057	liver	carcinoma
SK-PN-DW	909731	bone	Ewings_sarcoma-peripheral_primitive_neuroectodermal_tumour
RPMI-8226	905964	haematopoietic_and_lymphoid_tissue	lymphoid_neoplasm
SIMA	753620	autonomic_ganglia	neuroblastoma
LU-65	724863	lung	carcinoma
HuP-T3	907285	pancreas	carcinoma
NCI-H929	724825	haematopoietic_and_lymphoid_tissue	lymphoid_neoplasm
TE-12	946356	oesophagus	carcinoma
NCI-H1770	687804	lung	carcinoma
DEL	906836	haematopoietic_and_lymphoid_tissue	lymphoid_neoplasm
NCI-SNU-1	908444	stomach	carcinoma
CAL-85-1	910852	breast	carcinoma
huH-1	1298146	liver	carcinoma
NCI-H1651	910900	lung	carcinoma
RMG-I	909699	ovary	carcinoma
SJSA-1	909717	bone	other
SBC-3	753610	lung	carcinoma
SKN	1240215	soft_tissue	leiomyosarcoma
SK-MM-2	753612	haematopoietic_and_lymphoid_tissue	lymphoid_neoplasm
COR-L311	687980	lung	carcinoma
HA7-RCC	753558	kidney	carcinoma
GEO	2164691	large_intestine	carcinoma
MDA-MB-415	924240	breast	carcinoma
EW-18	949164	bone	Ewings_sarcoma-peripheral_primitive_neuroectodermal_tumour
CAL-39	924107	vulva	carcinoma
A673	684052	bone	Ewings_sarcoma-peripheral_primitive_neuroectodermal_tumour
MEL-HO	908124	skin	malignant_melanoma
VMRC-RCZ	909781	kidney	carcinoma
K2	1298160	skin	malignant_melanoma
DOV13	1479987	ovary	carcinoma
THP-1	909771	haematopoietic_and_lymphoid_tissue	haematopoietic_neoplasm
BB49-HNC	753532	upper_aerodigestive_tract	carcinoma
KMRC-1	1298168	kidney	carcinoma
769-P	910922	kidney	carcinoma
CL-40	1240124	large_intestine	carcinoma
MG-63	908131	bone	osteosarcoma
MHH-NB-11	908135	autonomic_ganglia	neuroblastoma
Caov-3	906825	ovary	carcinoma
EW-12	949162	bone	Ewings_sarcoma-peripheral_primitive_neuroectodermal_tumour
IM-9	753563	haematopoietic_and_lymphoid_tissue	lymphoid_neoplasm
Caov-4	949090	ovary	carcinoma
SK-MEL-28	905954	skin	malignant_melanoma
SF539	905984	central_nervous_system	glioma
PA-TU-8902	1298526	pancreas	carcinoma
TE-5	735784	oesophagus	carcinoma
COLO-678	910689	large_intestine	carcinoma
SNU-407	1660034	large_intestine	carcinoma
DJM-1	906841	skin	adnexal_tumour
COR-L32	1322212	lung	carcinoma
NCI-H1869	1240183	lung	carcinoma
KMS-12-BM	907281	haematopoietic_and_lymphoid_tissue	lymphoid_neoplasm
BICR10	1290724	upper_aerodigestive_tract	carcinoma
P32-ISH	1330987	haematopoietic_and_lymphoid_tissue	lymphoid_neoplasm
D-392MG	946370	central_nervous_system	glioma
Detroit562	906837	upper_aerodigestive_tract	carcinoma
NCI-H460	905943	lung	carcinoma
COLO-205	905961	large_intestine	carcinoma
JVM-2	907269	haematopoietic_and_lymphoid_tissue	lymphoid_neoplasm
MKN45	925340	stomach	carcinoma
MONO-MAC-6	908148	haematopoietic_and_lymphoid_tissue	haematopoietic_neoplasm
JHH-2	1240157	liver	carcinoma
RH-41	1240210	soft_tissue	rhabdomyosarcoma
NCI-H358	908465	lung	carcinoma
OVKATE	1240199	ovary	carcinoma
H2803	1240135	pleura	mesothelioma
CHP-134	910941	autonomic_ganglia	neuroblastoma
NCI-H1734	722058	lung	carcinoma
NCI-H1623	687798	lung	carcinoma
SF268	905986	central_nervous_system	glioma
IM-95	1240155	stomach	carcinoma
COLO-668	910692	lung	carcinoma
T-24	724812	urinary_tract	carcinoma
SK-N-FI	688087	autonomic_ganglia	neuroblastoma
MCC26	1298234	skin	carcinoma
SCC-3	910930	haematopoietic_and_lymphoid_tissue	lymphoid_neoplasm
KGN	924186	ovary	sex_cord-stromal_tumour
EM-2	906855	haematopoietic_and_lymphoid_tissue	haematopoietic_neoplasm
Becker	906746	central_nervous_system	glioma
NCI-H2452	908462	pleura	mesothelioma
KOPN-8	1330933	haematopoietic_and_lymphoid_tissue	lymphoid_neoplasm
OVTOKO	1298365	ovary	carcinoma
SUP-B8	910209	haematopoietic_and_lymphoid_tissue	lymphoid_neoplasm
CPC-N	753547	lung	carcinoma
SNU-C1	910905	large_intestine	carcinoma
CAL-78	1290765	bone	chondrosarcoma
SNU-387	909736	liver	carcinoma
U-CH2	1503373	bone	chordoma
NCI-H187	688007	lung	carcinoma
NCI-H2029	688011	lung	carcinoma
KARPAS-422	907274	haematopoietic_and_lymphoid_tissue	lymphoid_neoplasm
NCI-H1688	1298349	lung	carcinoma
PA-TU-8988T	1240201	pancreas	carcinoma
G-292_Clone_A141B1	1290807	bone	osteosarcoma
TT2609-C02	1240223	thyroid	carcinoma
G-401	907299	soft_tissue	rhabdoid_tumour
RL95-2	930082	endometrium	carcinoma
NCI-H446	688023	lung	carcinoma
EoL-1-cell	906856	haematopoietic_and_lymphoid_tissue	haematopoietic_neoplasm
UACC-62	905976	skin	malignant_melanoma
G-MEL	1240130	skin	malignant_melanoma
CADO-ES1	753539	bone	Ewings_sarcoma-peripheral_primitive_neuroectodermal_tumour
HT-1080	907064	soft_tissue	fibrosarcoma
LOUCY	907789	haematopoietic_and_lymphoid_tissue	lymphoid_neoplasm
MY-M12	1330960	haematopoietic_and_lymphoid_tissue	haematopoietic_neoplasm
ALL-PO	910944	haematopoietic_and_lymphoid_tissue	lymphoid_neoplasm
WM278	1240226	skin	malignant_melanoma
SK-MEL-31	909727	skin	malignant_melanoma
CS1	1290795	bone	other
KNS-81-FD	924188	central_nervous_system	glioma
JHU-022	1240162	upper_aerodigestive_tract	carcinoma
NEC8	910942	testis	germ_cell_tumour
KU-19-19	907312	urinary_tract	carcinoma
GA-10	1303896	haematopoietic_and_lymphoid_tissue	lymphoid_neoplasm
YT	946358	haematopoietic_and_lymphoid_tissue	lymphoid_neoplasm
H-EMC-SS	907290	bone	chondrosarcoma
SK-MEL-1	909723	skin	malignant_melanoma
EW-16	949165	bone	Ewings_sarcoma-peripheral_primitive_neuroectodermal_tumour
EB-3	906847	haematopoietic_and_lymphoid_tissue	lymphoid_neoplasm
NCI-H647	1240191	lung	carcinoma
CCF-STTG1	906823	central_nervous_system	glioma
MDA-MB-361	908121	breast	carcinoma
SW403	910908	large_intestine	carcinoma
Farage	1297449	haematopoietic_and_lymphoid_tissue	lymphoid_neoplasm
KARPAS-231	1327774	haematopoietic_and_lymphoid_tissue	lymphoid_neoplasm
Daudi	906831	haematopoietic_and_lymphoid_tissue	lymphoid_neoplasm
Saos-2	909707	bone	osteosarcoma
A3-KAW	910935	haematopoietic_and_lymphoid_tissue	lymphoid_neoplasm
FLO-1	1503361	oesophagus	carcinoma
HT-29	905939	large_intestine	carcinoma
NB17	949175	autonomic_ganglia	neuroblastoma
NCI-H810	925341	lung	carcinoma
MZ7-mel	753596	skin	malignant_melanoma
Ca-Ski	906824	cervix	carcinoma
HCC1954	749709	breast	carcinoma
NCI-H1355	724866	lung	carcinoma
HMV-II	907058	skin	malignant_melanoma
HT-1197	907065	urinary_tract	carcinoma
AMO-1	1295741	haematopoietic_and_lymphoid_tissue	lymphoid_neoplasm
BFTC-909	910698	kidney	carcinoma
KYSE-510	907321	oesophagus	carcinoma
8-MG-BA	687562	central_nervous_system	glioma
GI-1	906871	central_nervous_system	glioma
CAKI-1	905963	kidney	carcinoma
TE-6	946355	oesophagus	carcinoma
L-540	907323	haematopoietic_and_lymphoid_tissue	lymphoid_neoplasm
NCI-H748	909194	lung	carcinoma
ETK-1	906861	biliary_tract	carcinoma
EB2	906846	haematopoietic_and_lymphoid_tissue	lymphoid_neoplasm
NCI-H2023	1240187	lung	carcinoma
KON	1298215	upper_aerodigestive_tract	carcinoma
SAT	1299050	upper_aerodigestive_tract	carcinoma
AsPC-1	910702	pancreas	carcinoma
NCCIT	908441	testis	germ_cell_tumour
RPMI-8402	909702	haematopoietic_and_lymphoid_tissue	lymphoid_neoplasm
MIA-PaCa-2	724870	pancreas	carcinoma
CAL-51	910927	breast	carcinoma
JHH-4	1240158	liver	carcinoma
OSC-20	1240196	upper_aerodigestive_tract	carcinoma
PC-3_[JPC-3]	1240202	lung	carcinoma
SW156	1240220	kidney	carcinoma
NCI-H1568	1298348	lung	carcinoma
C3A	910850	liver	carcinoma
DSH1	753552	urinary_tract	carcinoma
NKM-1	908448	haematopoietic_and_lymphoid_tissue	haematopoietic_neoplasm
Jurkat	998184	haematopoietic_and_lymphoid_tissue	lymphoid_neoplasm
ES6	949157	bone	Ewings_sarcoma-peripheral_primitive_neuroectodermal_tumour
MKN7	924250	stomach	carcinoma
SNU-423	909737	liver	carcinoma
COR-L23	687780	lung	carcinoma
KARPAS-1106P	1327773	haematopoietic_and_lymphoid_tissue	lymphoid_neoplasm
TE-11	946354	oesophagus	carcinoma
KARPAS-620	1327775	haematopoietic_and_lymphoid_tissue	lymphoid_neoplasm
OVCAR-5	905969	ovary	carcinoma
22RV1	924100	prostate	carcinoma
LS-180	998189	large_intestine	carcinoma
SW1088	909745	central_nervous_system	glioma
OV-56	1480362	ovary	carcinoma
DMS-114	687983	lung	carcinoma
RS4-11	909703	haematopoietic_and_lymphoid_tissue	haematopoietic_neoplasm
SH-4	909713	skin	malignant_melanoma
SNU-1040	1659823	large_intestine	carcinoma
NCI-H2126	687814	lung	carcinoma
RERF-LC-MS	910931	lung	carcinoma
no-11	908450	central_nervous_system	glioma
NAMALWA	908159	haematopoietic_and_lymphoid_tissue	lymphoid_neoplasm
451Lu	1287706	skin	malignant_melanoma
OMC-1	949154	cervix	carcinoma
TUR	909773	haematopoietic_and_lymphoid_tissue	lymphoid_neoplasm
Calu-6	724859	lung	carcinoma
JHH-6	1240159	liver	carcinoma
CAL-29	1290730	urinary_tract	carcinoma
MV-4-11	908156	haematopoietic_and_lymphoid_tissue	haematopoietic_neoplasm
NCI-H1792	724868	lung	carcinoma
NY	910849	bone	osteosarcoma
RXF393	905978	kidney	carcinoma
ZR-75-30	909907	breast	carcinoma
PCI-6A	1240206	upper_aerodigestive_tract	carcinoma
RKN	1298539	ovary	other
EW-7	949160	bone	Ewings_sarcoma-peripheral_primitive_neuroectodermal_tumour
MOG-G-CCM	908144	central_nervous_system	glioma
CA46	910703	haematopoietic_and_lymphoid_tissue	lymphoid_neoplasm
SK-MEL-30	909726	skin	malignant_melanoma
QGP-1	1298534	pancreas	carcinoma
LC-2-ad	907786	lung	carcinoma
NCI-SNU-16	908446	stomach	carcinoma
SIG-M5	909715	haematopoietic_and_lymphoid_tissue	haematopoietic_neoplasm
CL-34	1290771	large_intestine	carcinoma
MOLP-8	1330950	haematopoietic_and_lymphoid_tissue	lymphoid_neoplasm
SW900	724879	lung	carcinoma
LAN-6	949170	autonomic_ganglia	neuroblastoma
NCI-H2172	1298353	lung	carcinoma
OCI-LY7	1659819	haematopoietic_and_lymphoid_tissue	lymphoid_neoplasm
GT3TKB	907041	stomach	carcinoma
BT-483	949093	breast	carcinoma
CHP-126	910567	autonomic_ganglia	neuroblastoma
MC-1010	907798	haematopoietic_and_lymphoid_tissue	haematopoietic_neoplasm
SU8686	1240218	pancreas	carcinoma
UACC-257	905977	skin	malignant_melanoma
NCI-H1650	687800	lung	carcinoma
SNU-449	909738	liver	carcinoma
NUGC-3	908455	stomach	carcinoma
Hs940-T	1298145	skin	malignant_melanoma
G-361	906865	skin	malignant_melanoma
HeLa	1298134	cervix	carcinoma
NCI-H23	905942	lung	carcinoma
IGROV-1	905968	ovary	carcinoma
NU-DUL-1	1330982	haematopoietic_and_lymphoid_tissue	lymphoid_neoplasm
K5	924238	thyroid	carcinoma
DBTRG-05MG	906835	central_nervous_system	glioma
CMK	910566	haematopoietic_and_lymphoid_tissue	haematopoietic_neoplasm
GDM-1	906870	haematopoietic_and_lymphoid_tissue	haematopoietic_neoplasm
H2722	1290812	pleura	mesothelioma
HCC2998	905971	large_intestine	carcinoma
VA-ES-BJ	688121	bone	sarcoma
MDA-MB-453	908122	breast	carcinoma
TMK-1	1299069	stomach	carcinoma
VM-CUB-1	909780	urinary_tract	carcinoma
Hs-578-T	905957	breast	carcinoma
NCI-H508	908442	large_intestine	carcinoma
SAS	909708	upper_aerodigestive_tract	carcinoma
RH-18	971774	soft_tissue	rhabdomyosarcoma
A172	687563	central_nervous_system	glioma
KU812	907311	haematopoietic_and_lymphoid_tissue	haematopoietic_neoplasm
SW756	724839	cervix	carcinoma
KOSC-2	753570	upper_aerodigestive_tract	carcinoma
DK-MG	906839	central_nervous_system	glioma
A388	910697	skin	carcinoma
COR-L88	906808	lung	carcinoma
BHT-101	906696	thyroid	carcinoma
CRO-AP3	1297440	NS	NS
DB	906832	haematopoietic_and_lymphoid_tissue	lymphoid_neoplasm
NCI-H1105	908468	lung	carcinoma
COLO-741	906815	large_intestine	carcinoma
HCT-116	905936	large_intestine	carcinoma
OVCAR-4	905990	ovary	carcinoma
JHU-029	1298156	upper_aerodigestive_tract	carcinoma
OV-90	1240197	ovary	carcinoma
MCC13	1333003	skin	carcinoma
HPAC	1298136	pancreas	carcinoma
ST486	910906	haematopoietic_and_lymphoid_tissue	lymphoid_neoplasm
PL-21	1330991	haematopoietic_and_lymphoid_tissue	haematopoietic_neoplasm
A704	910920	kidney	carcinoma
EFM-192A	1290798	breast	carcinoma
NUGC-4	1298357	stomach	carcinoma
CAL-12T	753540	lung	carcinoma
H290	1240139	pleura	mesothelioma
NCI-H250	924241	lung	carcinoma
ARH-77	906765	haematopoietic_and_lymphoid_tissue	lymphoid_neoplasm
PSN1	910546	pancreas	carcinoma
MKN28	908139	stomach	carcinoma
Sarc9371	1303910	bone	sarcoma
MLMA	908142	haematopoietic_and_lymphoid_tissue	lymphoid_neoplasm
SW1783	909750	central_nervous_system	glioma
KATOIII	907276	stomach	carcinoma
KMS-11	1659817	haematopoietic_and_lymphoid_tissue	lymphoid_neoplasm
SKN-3	1299059	upper_aerodigestive_tract	carcinoma
MDA-MB-175-VII	908120	breast	carcinoma
NCI-H378	688022	lung	carcinoma
BFTC-905	910926	urinary_tract	carcinoma
UDSCC2	1299073	upper_aerodigestive_tract	carcinoma
TCCSUP	687459	urinary_tract	carcinoma
201T	1287381	lung	carcinoma
GP5d	907291	large_intestine	carcinoma
CAL-148	924106	breast	carcinoma
H2869	1240138	pleura	mesothelioma
COLO-829	687448	skin	malignant_melanoma
MM1S	1659818	haematopoietic_and_lymphoid_tissue	lymphoid_neoplasm
OV-17R	1480361	ovary	carcinoma
NCI-H1299	724831	lung	carcinoma
SK-N-DZ	688086	autonomic_ganglia	neuroblastoma
S-117	910946	soft_tissue	sarcoma
KS-1	907313	central_nervous_system	glioma
GAK	910932	skin	malignant_melanoma
NCI-H2052	688058	pleura	mesothelioma
KE-37	907277	haematopoietic_and_lymphoid_tissue	lymphoid_neoplasm
Hep_3B2_1-7	1240147	NS	NS
KARPAS-45	907272	haematopoietic_and_lymphoid_tissue	lymphoid_neoplasm
TE-10	753622	oesophagus	carcinoma
NCI-H1876	1330972	lung	carcinoma
U-266	753615	haematopoietic_and_lymphoid_tissue	lymphoid_neoplasm
EFO-27	906852	ovary	carcinoma
NCI-H1048	687995	lung	carcinoma
DMS-53	907295	lung	carcinoma
KYSE-450	907320	oesophagus	carcinoma
HARA	1240142	lung	carcinoma
OCI-AML5	1330983	haematopoietic_and_lymphoid_tissue	haematopoietic_neoplasm
NCI-H1915	1240184	lung	carcinoma
JHOS-4	1480359	ovary	carcinoma
U-698-M	909777	haematopoietic_and_lymphoid_tissue	lymphoid_neoplasm
EVSA-T	906862	breast	carcinoma
EJM	1297447	haematopoietic_and_lymphoid_tissue	lymphoid_neoplasm
PCI-4B	1298531	upper_aerodigestive_tract	carcinoma
NCI-H716	908458	large_intestine	carcinoma
BC-1	910919	haematopoietic_and_lymphoid_tissue	lymphoid_neoplasm
NCI-H1436	908469	lung	carcinoma
LNZTA3WT4	1240170	central_nervous_system	glioma
MC116	907799	haematopoietic_and_lymphoid_tissue	lymphoid_neoplasm
LB2518-MEL	753579	skin	malignant_melanoma
NB(TU)1-10	1240181	autonomic_ganglia	neuroblastoma
NCI-H1975	924244	lung	carcinoma
HuO-3N1	909977	bone	osteosarcoma
KP-N-RT-BM-1	924189	autonomic_ganglia	neuroblastoma
SW1990	910907	pancreas	carcinoma
HT55	907287	large_intestine	carcinoma
VMRC-MELG	930301	skin	malignant_melanoma
ONS-76	909248	central_nervous_system	primitive_neuroectodermal_tumour-medulloblastoma
Ramos-2G6-4C10	910401	haematopoietic_and_lymphoid_tissue	lymphoid_neoplasm
FU-OV-1	1240129	ovary	carcinoma
QIMR-WIL	910545	haematopoietic_and_lymphoid_tissue	haematopoietic_neoplasm
RCC-JF	1524415	kidney	carcinoma
PC-3	905934	prostate	carcinoma
Hs939-T	1298144	skin	malignant_melanoma
23132-87	910924	stomach	carcinoma
LB771-HNC	753583	upper_aerodigestive_tract	carcinoma
TC-71	1240221	bone	Ewings_sarcoma-peripheral_primitive_neuroectodermal_tumour
BPH-1	924105	prostate	hyperplasia
OACp4C	1503362	oesophagus	carcinoma
EN	1240127	endometrium	carcinoma
NCI-H2009	724873	lung	carcinoma
MFE-280	908129	endometrium	carcinoma
HT-3	907068	cervix	carcinoma
HuCCT1	907069	biliary_tract	carcinoma
GMS-10	906873	central_nervous_system	glioma
BB30-HNC	753531	upper_aerodigestive_tract	carcinoma
RERF-LC-Sq1	1298538	lung	carcinoma
NTERA-2_cl_D1	908454	testis	germ_cell_tumour
A498	905948	kidney	carcinoma
GCIY	906869	stomach	carcinoma
KP-4	753572	pancreas	carcinoma
HCC-56	1290907	large_intestine	carcinoma
YAPC	909904	pancreas	carcinoma
CGTH-W-1	910568	thyroid	carcinoma
HO-1-u-1	753561	upper_aerodigestive_tract	carcinoma
NCI-H727	724855	lung	carcinoma
KLE	924187	endometrium	carcinoma
BB65-RCC	753533	kidney	carcinoma
SU-DHL-4	1331035	haematopoietic_and_lymphoid_tissue	lymphoid_neoplasm
TOV-21G	1240222	ovary	carcinoma
BE-13	906763	haematopoietic_and_lymphoid_tissue	lymphoid_neoplasm
IGR-1	907169	skin	malignant_melanoma
RCM-1	909263	large_intestine	carcinoma
OS-RC-2	909250	kidney	carcinoma
A253	906794	salivary_gland	carcinoma
EW-24	949168	bone	Ewings_sarcoma-peripheral_primitive_neuroectodermal_tumour
CHSA0011	1290767	bone	chondrosarcoma
RCH-ACV	1330994	haematopoietic_and_lymphoid_tissue	lymphoid_neoplasm
KINGS-1	907279	central_nervous_system	glioma
DoTc2-4510	906843	cervix	carcinoma
CHL-1	910853	skin	malignant_melanoma
LU-135	713899	lung	carcinoma
BEN	753534	lung	carcinoma
CAS-1	910943	central_nervous_system	glioma
LS-513	907795	large_intestine	carcinoma
OCI-AML3	1290455	haematopoietic_and_lymphoid_tissue	haematopoietic_neoplasm
HCC1500	1303900	breast	carcinoma
RCC-ER	1524417	kidney	carcinoma
SNU-C5	1674021	large_intestine	carcinoma
NCI-H64	688026	lung	carcinoma
NB6	949173	autonomic_ganglia	neuroblastoma
TE-4	1503371	oesophagus	carcinoma
NB-4	1323913	haematopoietic_and_lymphoid_tissue	haematopoietic_neoplasm
H2591	1240131	pleura	mesothelioma
HCC-78	1290908	lung	carcinoma
NCI-H847	1240193	lung	carcinoma
OPM-2	909249	haematopoietic_and_lymphoid_tissue	lymphoid_neoplasm
MZ1-PC	753595	pancreas	carcinoma
SW620	905962	large_intestine	carcinoma
NCI-H322M	905967	lung	carcinoma
NCI-H1092	687997	lung	carcinoma
AGS	906790	stomach	carcinoma
OE19	910079	oesophagus	carcinoma
KCL-22	1330931	haematopoietic_and_lymphoid_tissue	haematopoietic_neoplasm
UM-UC-3	724838	urinary_tract	carcinoma
J82	753566	urinary_tract	carcinoma
SW948	909757	large_intestine	carcinoma
HOS	907060	bone	osteosarcoma
SK-MEL-5	905956	skin	malignant_melanoma
SNU-81	1660036	large_intestine	carcinoma
RC-K8	1330995	haematopoietic_and_lymphoid_tissue	lymphoid_neoplasm
COLO-320-HSR	910569	large_intestine	carcinoma
KALS-1	907271	central_nervous_system	glioma
HTC-C3	924151	thyroid	carcinoma
RKO	909698	large_intestine	carcinoma
KASUMI-1	907275	haematopoietic_and_lymphoid_tissue	haematopoietic_neoplasm
NCI-H2227	688018	lung	carcinoma
NCI-H820	1333019	lung	carcinoma
EKVX	905970	lung	carcinoma
M14	905975	skin	malignant_melanoma
TK10	905980	kidney	carcinoma
WSU-NHL	909785	haematopoietic_and_lymphoid_tissue	lymphoid_neoplasm
AM-38	910933	central_nervous_system	glioma
OCUB-M	909256	breast	carcinoma
JHOS-2	1479995	ovary	carcinoma
NCI-H740	1331055	lung	carcinoma
MDA-MB-330	1330941	breast	carcinoma
NCI-H1395	684681	lung	carcinoma
COR-L303	1297438	lung	carcinoma
IST-MES1	907173	pleura	mesothelioma
HO-1-N-1	924111	salivary_gland	carcinoma
HSC-3	907061	upper_aerodigestive_tract	carcinoma
ES8	949155	bone	Ewings_sarcoma-peripheral_primitive_neuroectodermal_tumour
NCI-H650	722066	lung	carcinoma
KNS-42	907282	central_nervous_system	glioma
Hs766T	1298141	pancreas	carcinoma
ESO51	1503367	oesophagus	carcinoma
RT-112	909704	urinary_tract	carcinoma
MSTO-211H	908152	pleura	mesothelioma
Capan-2	910915	pancreas	carcinoma
GR-ST	906877	haematopoietic_and_lymphoid_tissue	lymphoid_neoplasm
KYAE-1	1503368	oesophagus	carcinoma
8305C	906795	thyroid	carcinoma
CP67-MEL	949092	skin	malignant_melanoma
CL-11	1290769	large_intestine	carcinoma
PANC-04-03	1298476	pancreas	carcinoma
HT-115	907289	large_intestine	carcinoma
TE-8	753623	oesophagus	carcinoma
DIFI	1789883	large_intestine	carcinoma
JVM-3	907270	haematopoietic_and_lymphoid_tissue	lymphoid_neoplasm
UACC-812	910910	breast	carcinoma
HC-1	907044	haematopoietic_and_lymphoid_tissue	lymphoid_neoplasm
IA-LM	910779	lung	carcinoma
LN-18	1240168	central_nervous_system	glioma
SU-DHL-10	1331033	haematopoietic_and_lymphoid_tissue	lymphoid_neoplasm
MS-1	753594	lung	carcinoma
SK-HEP-1	909719	liver	carcinoma
OE33	910549	oesophagus	other
PWR-1E	1330993	prostate	other
NCI-H838	910399	lung	carcinoma
EW-3	949161	bone	Ewings_sarcoma-peripheral_primitive_neuroectodermal_tumour
SW954	924247	vulva	carcinoma
ML-2	908141	haematopoietic_and_lymphoid_tissue	haematopoietic_neoplasm
DU-145	905935	prostate	carcinoma
NCI-H841	1240192	lung	carcinoma
CAL-120	906826	breast	carcinoma
SCC-25	910701	upper_aerodigestive_tract	carcinoma
NB69	908440	autonomic_ganglia	neuroblastoma
MOG-G-UVW	908145	central_nervous_system	glioma
EHEB	906854	haematopoietic_and_lymphoid_tissue	lymphoid_neoplasm
HUH-6-clone5	907070	liver	carcinoma
AN3-CA	910781	endometrium	carcinoma
SCaBER	1299051	urinary_tract	carcinoma
NCI-H28	908470	pleura	mesothelioma
CaR-1	924108	large_intestine	carcinoma
HCC38	749717	breast	carcinoma
SR	905965	haematopoietic_and_lymphoid_tissue	lymphoid_neoplasm
SU-DHL-6	1331037	haematopoietic_and_lymphoid_tissue	lymphoid_neoplasm
SW1710	909749	urinary_tract	carcinoma
G-402	907298	soft_tissue	leiomyoblastoma
MCAS	1240171	ovary	carcinoma
COLO-792	906814	skin	malignant_melanoma
NCI-H1993	908476	lung	carcinoma
RERF-GC-1B	1240209	stomach	carcinoma
NCI-H1304	753599	lung	carcinoma
SK-MEL-24	909725	skin	malignant_melanoma
OCI-LY-19	1330984	haematopoietic_and_lymphoid_tissue	lymphoid_neoplasm
L-363	924239	haematopoietic_and_lymphoid_tissue	lymphoid_neoplasm
MDA-MB-157	925338	breast	carcinoma
CHP-212	906820	autonomic_ganglia	neuroblastoma
BV-173	910710	haematopoietic_and_lymphoid_tissue	haematopoietic_neoplasm
PANC-02-03	1298475	pancreas	carcinoma
HCC-366	1240144	lung	carcinoma
WM35	1299080	skin	malignant_melanoma
LN-229	1240169	central_nervous_system	glioma
KYSE-220	1240167	oesophagus	carcinoma
SCC-9	909709	upper_aerodigestive_tract	carcinoma
SNU-C2B	909740	large_intestine	carcinoma
PCI-38	1240205	upper_aerodigestive_tract	carcinoma
OE21	1298359	oesophagus	carcinoma
RPMI-8866	910544	haematopoietic_and_lymphoid_tissue	haematopoietic_neoplasm
IPC-298	907171	skin	malignant_melanoma
HDQ-P1	1290922	breast	carcinoma
MDA-MB-468	908123	breast	carcinoma
647-V	906797	urinary_tract	carcinoma
MDA-MB-436	1240172	breast	carcinoma
ES7	684059	bone	Ewings_sarcoma-peripheral_primitive_neuroectodermal_tumour
LN-405	910694	central_nervous_system	glioma
KYM-1	1240166	soft_tissue	rhabdomyosarcoma
MOLM-16	1330948	haematopoietic_and_lymphoid_tissue	haematopoietic_neoplasm
PL4	1298533	pancreas	carcinoma
IST-MEL1	907172	skin	malignant_melanoma
COLO-783	1240125	skin	malignant_melanoma
VAL	1331048	haematopoietic_and_lymphoid_tissue	lymphoid_neoplasm
SUP-HD1	1331039	haematopoietic_and_lymphoid_tissue	lymphoid_neoplasm
NCI-H630	908482	large_intestine	carcinoma
GB-1	687568	central_nervous_system	glioma
EC-GI-10	753555	oesophagus	carcinoma
SW1573	724878	lung	carcinoma
MOLT-4	905958	haematopoietic_and_lymphoid_tissue	lymphoid_neoplasm
OCI-M1	1330985	haematopoietic_and_lymphoid_tissue	haematopoietic_neoplasm
PANC-03-27	925346	pancreas	carcinoma
JJN-3	1327766	haematopoietic_and_lymphoid_tissue	lymphoid_neoplasm
CTV-1	753548	haematopoietic_and_lymphoid_tissue	lymphoid_neoplasm
RD	909264	soft_tissue	rhabdomyosarcoma
H2369	1290808	pleura	mesothelioma
TK	1331045	haematopoietic_and_lymphoid_tissue	lymphoid_neoplasm
HOP-92	905973	lung	carcinoma
ES-2	1240128	ovary	carcinoma
D-566MG	946377	central_nervous_system	glioma
SNB19	905966	central_nervous_system	glioma
NCI-H520	908443	lung	carcinoma
TGW	910780	autonomic_ganglia	neuroblastoma
HCC1569	907046	breast	carcinoma
JHU-011	1240161	upper_aerodigestive_tract	carcinoma
TOV-112D	1299070	ovary	carcinoma
NCI-H211	1240189	lung	carcinoma
A2058	906792	skin	malignant_melanoma
OACM5-1	1503363	oesophagus	carcinoma
IGR-37	1240153	skin	malignant_melanoma
P30-OHK	909252	haematopoietic_and_lymphoid_tissue	lymphoid_neoplasm
KP-2	1298218	pancreas	carcinoma
NCI-H2405	687821	lung	carcinoma
HPAF-II	724869	pancreas	carcinoma
SF295	905985	central_nervous_system	glioma
SNU-475	909739	liver	carcinoma
SK-N-AS	724828	autonomic_ganglia	neuroblastoma
ME-1	1330942	haematopoietic_and_lymphoid_tissue	haematopoietic_neoplasm
DU-4475	906844	breast	carcinoma
P12-ICHIKAWA	909251	haematopoietic_and_lymphoid_tissue	lymphoid_neoplasm
NCI-ADR-RES	905987	ovary	carcinoma
KP-N-YS	946363	autonomic_ganglia	neuroblastoma
CAL-62	906828	thyroid	carcinoma
ASH-3	1290722	thyroid	carcinoma
HEC-1	907051	endometrium	carcinoma
NMC-G1	908449	central_nervous_system	glioma
LoVo	907790	large_intestine	carcinoma
RPMI-7951	910903	skin	malignant_melanoma
BHY	753535	upper_aerodigestive_tract	carcinoma
U-87-MG	687590	central_nervous_system	glioma
H3118	1240140	upper_aerodigestive_tract	carcinoma
C32	906830	skin	malignant_melanoma
NCI-H345	688021	lung	carcinoma
KYSE-520	753575	oesophagus	carcinoma
MPP-89	908150	pleura	mesothelioma
NCI-H2291	724874	lung	carcinoma
YMB-1-E	1303911	breast	carcinoma
NCI-H2170	687815	lung	carcinoma
NOS-1	925345	bone	osteosarcoma
AU565	910704	breast	carcinoma
697	906800	haematopoietic_and_lymphoid_tissue	lymphoid_neoplasm
L-428	907322	haematopoietic_and_lymphoid_tissue	lymphoid_neoplasm
ES4	949156	bone	Ewings_sarcoma-peripheral_primitive_neuroectodermal_tumour
EW-1	949163	bone	Ewings_sarcoma-peripheral_primitive_neuroectodermal_tumour
RCC-AB	1524418	kidney	carcinoma
NCI-H1694	688006	lung	carcinoma
Hs-445	1322218	haematopoietic_and_lymphoid_tissue	lymphoid_neoplasm
MHH-ES-1	908134	bone	Ewings_sarcoma-peripheral_primitive_neuroectodermal_tumour
NCI-H720	687600	lung	carcinoma
NALM-6	908158	haematopoietic_and_lymphoid_tissue	lymphoid_neoplasm
H513	1240141	pleura	mesothelioma
SW1116	909746	large_intestine	carcinoma
D-423MG	946372	central_nervous_system	glioma
SNG-M	909735	endometrium	carcinoma
EW-13	949166	bone	Ewings_sarcoma-peripheral_primitive_neuroectodermal_tumour
MC-CAR	683665	haematopoietic_and_lymphoid_tissue	lymphoid_neoplasm
SK-GT-2	1503364	stomach	carcinoma
D-502MG	946373	central_nervous_system	glioma
SiHa	930297	cervix	carcinoma
HEL	907053	haematopoietic_and_lymphoid_tissue	haematopoietic_neoplasm
H2795	1290813	pleura	mesothelioma
IHH-4	1240154	thyroid	carcinoma
NCI-H2122	722046	lung	carcinoma
A431	910925	skin	carcinoma
JSC-1	1327769	haematopoietic_and_lymphoid_tissue	lymphoid_neoplasm
NCI-H441	908460	lung	carcinoma
NCI-H82	688031	lung	carcinoma
OC-314	909257	ovary	carcinoma
KURAMOCHI	909975	ovary	carcinoma
OVMIU	1240200	ovary	carcinoma
ES5	684057	bone	Ewings_sarcoma-peripheral_primitive_neuroectodermal_tumour
NCI-H128	753597	lung	carcinoma
TE-1	753621	oesophagus	carcinoma
COLO-680N	906817	oesophagus	carcinoma
HCC1187	749711	breast	carcinoma
LC4-1	907787	haematopoietic_and_lymphoid_tissue	lymphoid_neoplasm
SU-DHL-16	1331034	haematopoietic_and_lymphoid_tissue	lymphoid_neoplasm
T98G	687586	central_nervous_system	glioma
HD-MY-Z	907050	haematopoietic_and_lymphoid_tissue	lymphoid_neoplasm
SW626	909753	ovary	carcinoma
KM-H2	909976	haematopoietic_and_lymphoid_tissue	lymphoid_neoplasm
GI-ME-N	906872	autonomic_ganglia	neuroblastoma
HSC-4	907062	upper_aerodigestive_tract	carcinoma
MEG-01	908126	haematopoietic_and_lymphoid_tissue	haematopoietic_neoplasm
ML-1	1240178	thyroid	carcinoma
FTC-133	906864	thyroid	carcinoma
EPLC-272H	753556	lung	carcinoma
NCI-H2228	687816	lung	carcinoma
RT4	687455	urinary_tract	carcinoma
MFM-223	910948	breast	carcinoma
Hs683	1240150	central_nervous_system	glioma
K-562	905940	haematopoietic_and_lymphoid_tissue	haematopoietic_neoplasm
BALL-1	910705	haematopoietic_and_lymphoid_tissue	lymphoid_neoplasm
WM793B	1299081	skin	malignant_melanoma
8505C	924102	thyroid	carcinoma
SKG-IIIa	930298	cervix	carcinoma
SCC-4	910904	upper_aerodigestive_tract	carcinoma
EBC-1	753554	lung	carcinoma
LS-123	907792	large_intestine	carcinoma
JHH-7	1240160	liver	carcinoma
CAMA-1	946382	breast	carcinoma
MZ2-MEL	971777	skin	malignant_melanoma
42-MG-BA	687561	central_nervous_system	glioma
KYSE-270	907319	oesophagus	carcinoma
CFPAC-1	906821	pancreas	carcinoma
SNU-398	1240217	liver	carcinoma
H4	907042	central_nervous_system	glioma
MES-SA	908127	soft_tissue	sarcoma
CAL-54	910952	kidney	carcinoma
NCI-H2347	687820	lung	carcinoma
HuH-7	907071	liver	carcinoma
FU97	1290806	stomach	carcinoma
LOXIMVI	905974	skin	malignant_melanoma
HCC2157	749715	breast	carcinoma
ACHN	905950	kidney	carcinoma
HGC-27	907055	stomach	carcinoma
SW962	909758	vulva	carcinoma
KYSE-410	753574	oesophagus	carcinoma
PF-382	909260	haematopoietic_and_lymphoid_tissue	lymphoid_neoplasm
LP-1	907791	haematopoietic_and_lymphoid_tissue	lymphoid_neoplasm
H2818	1290814	pleura	mesothelioma
A549	905949	lung	carcinoma
ChaGo-K-1	687596	lung	carcinoma
LU-165	753589	lung	carcinoma
PL18	1240208	pancreas	carcinoma
A2780	906804	ovary	carcinoma
NCI-H1581	908471	lung	carcinoma
HCC1419	907045	breast	carcinoma
MFE-319	1240174	endometrium	carcinoma
CW-2	910554	large_intestine	carcinoma
PC-14	753608	lung	carcinoma
NCI-H524	908483	lung	carcinoma
RH-1	971773	soft_tissue	rhabdomyosarcoma
ES3	684055	bone	Ewings_sarcoma-peripheral_primitive_neuroectodermal_tumour
NOMO-1	908451	haematopoietic_and_lymphoid_tissue	haematopoietic_neoplasm
LAMA-84	907783	haematopoietic_and_lymphoid_tissue	haematopoietic_neoplasm
PEO1	1480372	ovary	carcinoma
SK-ES-1	684072	bone	Ewings_sarcoma-peripheral_primitive_neuroectodermal_tumour
no-10	908452	central_nervous_system	glioma
CRO-AP2	906807	haematopoietic_and_lymphoid_tissue	lymphoid_neoplasm
SK-LMS-1	909720	soft_tissue	sarcoma
SCC-15	910911	upper_aerodigestive_tract	carcinoma
OAW-28	946360	ovary	carcinoma
KO52	1330932	haematopoietic_and_lymphoid_tissue	haematopoietic_neoplasm
LB2241-RCC	753578	kidney	carcinoma
DAN-G	1290797	pancreas	carcinoma
GOTO	906875	autonomic_ganglia	neuroblastoma
SJRH30	909716	soft_tissue	rhabdomyosarcoma
NCI-H835	753607	lung	carcinoid-endocrine_tumour
SW872	909756	soft_tissue	liposarcoma
NCI-H196	1240186	lung	carcinoma
SUP-B15	1247871	haematopoietic_and_lymphoid_tissue	lymphoid_neoplasm
Raji	909262	haematopoietic_and_lymphoid_tissue	lymphoid_neoplasm
CTB-1	949088	haematopoietic_and_lymphoid_tissue	lymphoid_neoplasm
JEG-3	907176	placenta	choriocarcinoma
SW1271	1299062	lung	carcinoma
SK-N-SH	717431	autonomic_ganglia	neuroblastoma
TE-9	946353	oesophagus	carcinoma
D-542MG	753549	central_nervous_system	glioma
NBsusSR	925342	autonomic_ganglia	neuroblastoma
LK-2	687787	lung	carcinoma
HCC1937	749714	breast	carcinoma
H2461	1290810	pleura	mesothelioma
SNU-61	1660035	large_intestine	carcinoma
NCI-H2342	687819	lung	carcinoma
YKG-1	687592	central_nervous_system	glioma
TASK1	1299067	bone	Askins_tumour
NB1	949179	autonomic_ganglia	neuroblastoma
A101D	910921	skin	malignant_melanoma
RO82-W-1	930083	thyroid	carcinoma
ESO26	1503366	oesophagus	carcinoma
H2731	1240134	pleura	mesothelioma
KYSE-140	753573	oesophagus	carcinoma
JURL-MK1	1327771	haematopoietic_and_lymphoid_tissue	haematopoietic_neoplasm
RVH-421	909706	skin	malignant_melanoma
TYK-nu	909774	ovary	carcinoma
KY821	907300	haematopoietic_and_lymphoid_tissue	haematopoietic_neoplasm
MDA-MB-231	905960	breast	carcinoma
MHH-PREB-1	908136	haematopoietic_and_lymphoid_tissue	lymphoid_neoplasm
NCI-H1437	687794	lung	carcinoma
BxPC-3	906693	pancreas	carcinoma
T-T	1299064	oesophagus	carcinoma
NCI-H1781	1298350	lung	carcinoma
Set2	1659820	haematopoietic_and_lymphoid_tissue	haematopoietic_neoplasm
EFM-19	906851	breast	carcinoma
KARPAS-299	907273	haematopoietic_and_lymphoid_tissue	lymphoid_neoplasm
FADU	906863	upper_aerodigestive_tract	carcinoma
SK-MEL-3	909724	skin	malignant_melanoma
BICR22	1240121	upper_aerodigestive_tract	carcinoma
JEKO-1	1327765	haematopoietic_and_lymphoid_tissue	lymphoid_neoplasm
SBC-5	713880	lung	carcinoma
RL	910861	haematopoietic_and_lymphoid_tissue	lymphoid_neoplasm
VCaP	1299075	prostate	carcinoma
CAL-72	906827	bone	osteosarcoma
BE2-M17	753616	autonomic_ganglia	neuroblastoma
UWB1_289	1480374	ovary	carcinoma
Hey	1479988	ovary	carcinoma
SLVL	1331032	haematopoietic_and_lymphoid_tissue	lymphoid_neoplasm
HN	907059	upper_aerodigestive_tract	carcinoma
SW13	909744	adrenal_gland	adrenal_cortical_carcinoma
HCC-44	1240145	lung	carcinoma
RCC10RGB	909974	kidney	carcinoma
639-V	906798	urinary_tract	carcinoma
MS751	1240179	cervix	carcinoma
LB831-BLC	753584	urinary_tract	carcinoma
GCT	906999	soft_tissue	malignant_fibrous_histiocytoma-pleomorphic_sarcoma
TGBC11TKB	909770	stomach	carcinoma
NCI-H1417	688001	lung	carcinoma
PANC-08-13	925347	pancreas	carcinoma
LCLC-103H	753586	lung	carcinoma
DMS-273	687985	lung	carcinoma
LCLC-97TM1	946361	lung	carcinoma
MOLT-16	908147	haematopoietic_and_lymphoid_tissue	lymphoid_neoplasm
NCC010	1509073	kidney	carcinoma
UACC-893	909778	breast	carcinoma
EFO-21	911905	ovary	carcinoma
CCRF-CEM	905952	haematopoietic_and_lymphoid_tissue	lymphoid_neoplasm
NCI-H2141	688014	lung	carcinoma
KMOE-2	907280	haematopoietic_and_lymphoid_tissue	haematopoietic_neoplasm
HCC-827	1240146	lung	carcinoma
LOU-NH91	1298226	lung	carcinoma
SNU-283	1659929	large_intestine	carcinoma
Hs746T	1240151	stomach	carcinoma
CESS	910688	haematopoietic_and_lymphoid_tissue	haematopoietic_neoplasm
HSC-39	1322224	stomach	carcinoma
TGBC24TKB	910695	biliary_tract	carcinoma
SKM-1	909722	haematopoietic_and_lymphoid_tissue	haematopoietic_neoplasm
ECC12	906849	stomach	carcinoma
RERF-LC-FM	930081	lung	carcinoma
NB10	949171	autonomic_ganglia	neuroblastoma
SW684	909754	soft_tissue	fibrosarcoma
HCC-15	1240143	lung	carcinoma
NCI-H2081	908480	lung	carcinoma
D-247MG	946367	central_nervous_system	glioma
MEL-JUSO	908125	skin	malignant_melanoma
MOLT-13	908146	haematopoietic_and_lymphoid_tissue	lymphoid_neoplasm
KELLY	753618	autonomic_ganglia	neuroblastoma
LC-1-sq	1298223	lung	carcinoma
SNB75	905982	central_nervous_system	glioma
BL-41	910706	haematopoietic_and_lymphoid_tissue	lymphoid_neoplasm
HCE-4	753559	oesophagus	carcinoma
HT-1376	907066	urinary_tract	carcinoma
NCI-H69	688027	lung	carcinoma
NH-12	908447	autonomic_ganglia	neuroblastoma
PFSK-1	683667	central_nervous_system	primitive_neuroectodermal_tumour-medulloblastoma
SK-GT-4	1503365	oesophagus	carcinoma
MFE-296	908130	endometrium	carcinoma
D-263MG	946368	central_nervous_system	glioma
LB996-RCC	753585	kidney	carcinoma
NCI-H292	753604	lung	carcinoma
CAPAN-1	753624	pancreas	carcinoma
MDA-MB-435	905988	skin	malignant_melanoma
NCI-H1944	1240185	lung	carcinoma
ESS-1	907000	endometrium	carcinoma
VMRC-RCW	1240224	kidney	carcinoma

## Sheet: Decode
TCGA tissue classification:
TCGA Label	Definition
ACC	Adrenocortical carcinoma
ALL	Acute lymphoblastic leukemia
BLCA	Bladder Urothelial Carcinoma
BRCA	Breast invasive carcinoma
CESC	Cervical squamous cell carcinoma and endocervical adenocarcinoma
CLL	Chronic Lymphocytic Leukemia
COREAD	Colon adenocarcinoma and Rectum adenocarcinoma
DLBC	Lymphoid Neoplasm Diffuse Large B-cell Lymphoma
ESCA	Esophageal carcinoma
GBM	Glioblastoma multiforme
HNSC	Head and Neck squamous cell carcinoma
KIRC	Kidney renal clear cell carcinoma
LAML	Acute Myeloid Leukemia
LCML	Chronic Myelogenous Leukemia
LGG	Brain Lower Grade Glioma
LIHC	Liver hepatocellular carcinoma
LUAD	Lung adenocarcinoma
LUSC	Lung squamous cell carcinoma
MB	Medulloblastoma
MESO	Mesothelioma
MM	Multiple Myeloma
NB	Neuroblastoma
OV	Ovarian serous cystadenocarcinoma
PAAD	Pancreatic adenocarcinoma
PRAD	Prostate adenocarcinoma
SCLC	Small Cell Lung Cancer
SKCM	Skin Cutaneous Melanoma
STAD	Stomach adenocarcinoma
THCA	Thyroid carcinoma
UCEC	Uterine Corpus Endometrial Carcinoma
Microsatillite instability data
MSS	Microsatillite class stable (0 of 5 markers show instability)
MSI-L	Microsatillite instability low (1 of 5 markers show instability)
MSI-H	Microsatillite instability High (>=2 of 5 markers show instability)
Full data available from the COSMIC Cell Lines database (http://cancer.sanger.ac.uk/cancergenome/assets/cell_lines/QC.xlsx)
Growth media
D/F12	DMEM/F12: DMEM/F12, 10% FBS, 1% PenStrep
D/F12+10	DMEM/F12+additonal 10%FBS: DMEM/F12, 20% FBS, 1% PenStrep
R	RPMI: RPMI, 10% FBS, % PenStrep, % Glucose, 1mM Sodium Pyruvate
R+10	RPMI+additonal 10%FBS: RPMI, 20% FBS, % PenStrep, % Glucose, 1mM Sodium Pyruvate
H	Hites: 5ug/ml Insulin, 10nM B-estradiol, 10uM Hydrocortisone
