# Supplementary material for: Significance of CD8+ T cell infiltration-related biomarkers and the corresponding prediction model for the prognosis of kidney renal clear cell carcinoma
Source: Aging (Albany NY). 2021 Oct 4;13(19):22912–33. doi: 10.18632/aging.203584 (PMC8544304; doi:10.18632/aging.203584)
Supplement: Supplementary Material 3 [file aging-13-203584-s003.xlsx]

## Sheet: TCGA-CDR
	bcr_patient_barcode	type	age_at_initial_pathologic_diagnosis	gender	race	ajcc_pathologic_tumor_stage	clinical_stage	histological_type	histological_grade	initial_pathologic_dx_year	menopause_status	birth_days_to	vital_status	tumor_status	last_contact_days_to	death_days_to	cause_of_death	new_tumor_event_type	new_tumor_event_site	new_tumor_event_site_other	new_tumor_event_dx_days_to	treatment_outcome_first_course	margin_status	residual_tumor	OS	OS.time	DSS	DSS.time	DFI	DFI.time	PFI	PFI.time	Redaction
1	TCGA-OR-A5J1	ACC	58	MALE	WHITE	Stage II	[Not Applicable]	Adrenocortical carcinoma- Usual Type	[Not Available]	2000	[Not Available]	-21496	Dead	WITH TUMOR	#N/A	1355	[Not Available]	Distant Metastasis	Peritoneal Surfaces	#N/A	754	Complete Remission/Response	#N/A	#N/A	1	1355	1	1355	1	754	1	754
2	TCGA-OR-A5J2	ACC	44	FEMALE	WHITE	Stage IV	[Not Applicable]	Adrenocortical carcinoma- Usual Type	[Not Available]	2004	[Not Available]	-16090	Dead	WITH TUMOR	#N/A	1677	[Not Available]	Distant Metastasis	Soft Tissue	#N/A	289	Progressive Disease	#N/A	#N/A	1	1677	1	1677	#N/A	#N/A	1	289
3	TCGA-OR-A5J3	ACC	23	FEMALE	WHITE	Stage III	[Not Applicable]	Adrenocortical carcinoma- Usual Type	[Not Available]	2008	[Not Available]	-8624	Alive	WITH TUMOR	2091	#N/A	[Not Available]	Distant Metastasis	Lung	#N/A	53	Complete Remission/Response	#N/A	#N/A	0	2091	0	2091	1	53	1	53
4	TCGA-OR-A5J4	ACC	23	FEMALE	WHITE	Stage IV	[Not Applicable]	Adrenocortical carcinoma- Usual Type	[Not Available]	2000	[Not Available]	-8451	Dead	WITH TUMOR	#N/A	423	[Not Available]	Locoregional Recurrence	Peritoneal Surfaces	#N/A	126	Progressive Disease	#N/A	#N/A	1	423	1	423	#N/A	#N/A	1	126
5	TCGA-OR-A5J5	ACC	30	MALE	WHITE	Stage III	[Not Applicable]	Adrenocortical carcinoma- Usual Type	[Not Available]	2000	[Not Available]	-11171	Dead	WITH TUMOR	#N/A	365	[Not Available]	Locoregional Recurrence	Other, specify	vena cava thrombus	50	Progressive Disease	#N/A	#N/A	1	365	1	365	#N/A	#N/A	1	50
6	TCGA-OR-A5J6	ACC	29	FEMALE	BLACK OR AFRICAN AMERICAN	Stage II	[Not Applicable]	Adrenocortical carcinoma- Usual Type	[Not Available]	2006	[Not Available]	-10839	Alive	TUMOR FREE	2703	#N/A	[Not Available]	#N/A	#N/A	#N/A	#N/A	Complete Remission/Response	#N/A	#N/A	0	2703	0	2703	0	2703	0	2703
7	TCGA-OR-A5J7	ACC	30	FEMALE	WHITE	Stage III	[Not Applicable]	Adrenocortical carcinoma- Usual Type	[Not Available]	2009	[Not Available]	-11279	Dead	WITH TUMOR	#N/A	490	[Not Available]	Locoregional Recurrence	Retroperitoneal lymph nodes	#N/A	162	Progressive Disease	#N/A	#N/A	1	490	1	490	#N/A	#N/A	1	162
8	TCGA-OR-A5J8	ACC	66	MALE	WHITE	Stage III	[Not Applicable]	Adrenocortical carcinoma- Usual Type	[Not Available]	2011	[Not Available]	-24266	Dead	WITH TUMOR	#N/A	579	[Not Available]	Locoregional Recurrence	Peritoneal Surfaces	#N/A	530	Complete Remission/Response	#N/A	#N/A	1	579	1	579	1	530	1	530
9	TCGA-OR-A5J9	ACC	22	FEMALE	WHITE	Stage II	[Not Applicable]	Adrenocortical carcinoma- Usual Type	[Not Available]	2010	[Not Available]	-8175	Alive	WITH TUMOR	1352	#N/A	[Not Available]	Distant Metastasis	Lung	#N/A	414	Complete Remission/Response	#N/A	#N/A	0	1352	0	1352	1	414	1	414
10	TCGA-OR-A5JA	ACC	53	FEMALE	WHITE	Stage IV	[Not Applicable]	Adrenocortical carcinoma- Usual Type	[Not Available]	2004	[Not Available]	-19436	Dead	WITH TUMOR	#N/A	922	[Not Available]	#N/A	#N/A	#N/A	#N/A	[Not Available]	#N/A	#N/A	1	922	1	922	#N/A	#N/A	1	922
11	TCGA-OR-A5JB	ACC	52	MALE	WHITE	Stage IV	[Not Applicable]	Adrenocortical carcinoma- Usual Type	[Not Available]	2000	[Not Available]	-19172	Dead	#N/A	#N/A	551	[Not Available]	#N/A	#N/A	#N/A	#N/A	[Unknown]	#N/A	#N/A	1	551	#N/A	551	#N/A	#N/A	0	551
12	TCGA-OR-A5JC	ACC	37	MALE	WHITE	[Not Available]	[Not Applicable]	Adrenocortical carcinoma- Usual Type	[Not Available]	2001	[Not Available]	-13862	Dead	#N/A	#N/A	1750	[Not Available]	#N/A	#N/A	#N/A	#N/A	[Not Available]	#N/A	#N/A	1	1750	#N/A	1750	#N/A	#N/A	0	1750
13	TCGA-OR-A5JD	ACC	57	FEMALE	WHITE	Stage II	[Not Applicable]	Adrenocortical Carcinoma- Oncocytic Type	[Not Available]	2005	[Not Available]	-20989	Alive	TUMOR FREE	3038	#N/A	[Not Available]	#N/A	#N/A	#N/A	#N/A	Complete Remission/Response	#N/A	#N/A	0	3038	0	3038	0	3038	0	3038
14	TCGA-OR-A5JE	ACC	17	FEMALE	WHITE	Stage I	[Not Applicable]	Adrenocortical carcinoma- Usual Type	[Not Available]	2005	[Not Available]	-6455	Dead	WITH TUMOR	#N/A	2105	[Not Available]	Locoregional Recurrence	#N/A	#N/A	477	[Unknown]	#N/A	#N/A	1	2105	1	2105	#N/A	#N/A	1	477
15	TCGA-OR-A5JF	ACC	69	FEMALE	WHITE	Stage II	[Not Applicable]	Adrenocortical carcinoma- Usual Type	[Not Available]	2007	[Not Available]	-25502	Alive	TUMOR FREE	2015	#N/A	[Not Available]	#N/A	#N/A	#N/A	#N/A	Complete Remission/Response	#N/A	#N/A	0	2015	0	2015	0	2015	0	2015
16	TCGA-OR-A5JG	ACC	61	MALE	WHITE	Stage IV	[Not Applicable]	Adrenocortical carcinoma- Usual Type	[Not Available]	2008	[Not Available]	-22390	Dead	WITH TUMOR	#N/A	541	[Not Available]	#N/A	#N/A	#N/A	#N/A	[Not Available]	#N/A	#N/A	1	541	1	541	#N/A	#N/A	1	541
17	TCGA-OR-A5JH	ACC	32	FEMALE	WHITE	Stage II	[Not Applicable]	Adrenocortical Carcinoma- Oncocytic Type	[Not Available]	2008	[Not Available]	-11994	Alive	TUMOR FREE	2110	#N/A	[Not Available]	#N/A	#N/A	#N/A	#N/A	Complete Remission/Response	#N/A	#N/A	0	2110	0	2110	0	2110	0	2110
18	TCGA-OR-A5JI	ACC	22	MALE	WHITE	Stage I	[Not Applicable]	Adrenocortical carcinoma- Usual Type	[Not Available]	2008	[Not Available]	-8177	Alive	TUMOR FREE	2331	#N/A	[Not Available]	#N/A	#N/A	#N/A	#N/A	Complete Remission/Response	#N/A	#N/A	0	2331	0	2331	0	2331	0	2331
19	TCGA-OR-A5JJ	ACC	65	MALE	WHITE	Stage IV	[Not Applicable]	Adrenocortical carcinoma- Usual Type	[Not Available]	2009	[Not Available]	-24082	Dead	WITH TUMOR	#N/A	490	[Not Available]	#N/A	#N/A	#N/A	#N/A	Progressive Disease	#N/A	#N/A	1	490	1	490	#N/A	#N/A	1	490
20	TCGA-OR-A5JK	ACC	49	MALE	WHITE	Stage IV	[Not Applicable]	Adrenocortical carcinoma- Usual Type	[Not Available]	2009	[Not Available]	-18214	Alive	TUMOR FREE	1497	#N/A	[Not Available]	#N/A	#N/A	#N/A	#N/A	Partial Remission/Response	#N/A	#N/A	0	1497	0	1497	#N/A	#N/A	0	1497
21	TCGA-OR-A5JL	ACC	36	FEMALE	WHITE	Stage I	[Not Applicable]	Adrenocortical carcinoma- Usual Type	[Not Available]	2009	[Not Available]	-13155	Alive	TUMOR FREE	2056	#N/A	[Not Available]	#N/A	#N/A	#N/A	#N/A	Complete Remission/Response	#N/A	#N/A	0	2056	0	2056	0	2056	0	2056
22	TCGA-OR-A5JM	ACC	25	FEMALE	WHITE	Stage IV	[Not Applicable]	Adrenocortical carcinoma- Usual Type	[Not Available]	2011	[Not Available]	-9359	Dead	WITH TUMOR	#N/A	562	[Not Available]	Distant Metastasis	Liver	#N/A	72	Progressive Disease	#N/A	#N/A	1	562	1	562	#N/A	#N/A	1	72
23	TCGA-OR-A5JO	ACC	26	FEMALE	WHITE	Stage I	[Not Applicable]	Adrenocortical carcinoma- Usual Type	[Not Available]	2005	[Not Available]	-9547	Alive	TUMOR FREE	1194	#N/A	[Not Available]	#N/A	#N/A	#N/A	#N/A	Complete Remission/Response	#N/A	#N/A	0	1194	0	1194	0	1194	0	1194
24	TCGA-OR-A5JP	ACC	40	MALE	WHITE	Stage II	[Not Applicable]	Adrenocortical carcinoma- Usual Type	[Not Available]	2012	[Not Available]	-14667	Alive	TUMOR FREE	464	#N/A	[Not Available]	#N/A	#N/A	#N/A	#N/A	Complete Remission/Response	#N/A	#N/A	0	464	0	464	0	464	0	464
25	TCGA-OR-A5JQ	ACC	26	FEMALE	WHITE	Stage II	[Not Applicable]	Adrenocortical Carcinoma- Myxoid Type	[Not Available]	2006	[Not Available]	-9667	Alive	TUMOR FREE	1103	#N/A	[Not Available]	#N/A	#N/A	#N/A	#N/A	Complete Remission/Response	#N/A	#N/A	0	1103	0	1103	0	1103	0	1103
26	TCGA-OR-A5JR	ACC	45	MALE	WHITE	Stage I	[Not Applicable]	Adrenocortical carcinoma- Usual Type	[Not Available]	2002	[Not Available]	-16604	Alive	TUMOR FREE	3688	#N/A	[Not Available]	#N/A	#N/A	#N/A	#N/A	Complete Remission/Response	#N/A	#N/A	0	3688	0	3688	0	3688	0	3688
27	TCGA-OR-A5JS	ACC	65	FEMALE	WHITE	Stage II	[Not Applicable]	Adrenocortical carcinoma- Usual Type	[Not Available]	2011	[Not Available]	-24017	Alive	WITH TUMOR	383	#N/A	[Not Available]	Distant Metastasis	Lung	#N/A	166	[Not Available]	#N/A	#N/A	0	383	0	383	#N/A	#N/A	1	166
28	TCGA-OR-A5JT	ACC	65	FEMALE	WHITE	Stage II	[Not Applicable]	Adrenocortical carcinoma- Usual Type	[Not Available]	2011	[Not Available]	-23794	Alive	WITH TUMOR	907	#N/A	[Not Available]	#N/A	#N/A	#N/A	#N/A	Stable Disease	#N/A	#N/A	0	907	0	907	#N/A	#N/A	0	907
29	TCGA-OR-A5JU	ACC	58	FEMALE	WHITE	Stage III	[Not Applicable]	Adrenocortical carcinoma- Usual Type	[Not Available]	2010	[Not Available]	-21292	Dead	WITH TUMOR	#N/A	289	[Not Available]	Distant Metastasis	Other, specify	Ovarian	268	Progressive Disease	#N/A	#N/A	1	289	1	289	#N/A	#N/A	1	268
30	TCGA-OR-A5JV	ACC	55	MALE	WHITE	Stage II	[Not Applicable]	Adrenocortical carcinoma- Usual Type	[Not Available]	2008	[Not Available]	-20319	Alive	TUMOR FREE	2023	#N/A	[Not Available]	New Primary Tumor	Lymph Node(s)	#N/A	953	Complete Remission/Response	#N/A	#N/A	0	2023	0	2023	0	2023	1	953
31	TCGA-OR-A5JW	ACC	47	MALE	WHITE	Stage II	[Not Applicable]	Adrenocortical carcinoma- Usual Type	[Not Available]	2008	[Not Available]	-17513	Alive	TUMOR FREE	2202	#N/A	[Not Available]	#N/A	#N/A	#N/A	#N/A	Complete Remission/Response	#N/A	#N/A	0	2202	0	2202	0	2202	0	2202
32	TCGA-OR-A5JX	ACC	50	MALE	WHITE	Stage III	[Not Applicable]	Adrenocortical carcinoma- Usual Type	[Not Available]	2009	[Not Available]	-18402	Alive	TUMOR FREE	950	#N/A	[Not Available]	#N/A	#N/A	#N/A	#N/A	[Not Available]	#N/A	#N/A	0	950	0	950	#N/A	#N/A	0	950
33	TCGA-OR-A5JY	ACC	68	FEMALE	WHITE	Stage IV	[Not Applicable]	Adrenocortical carcinoma- Usual Type	[Not Available]	2011	[Not Available]	-25190	Dead	WITH TUMOR	#N/A	552	[Not Available]	Distant Metastasis	Liver	#N/A	75	Progressive Disease	#N/A	#N/A	1	552	1	552	#N/A	#N/A	1	75
34	TCGA-OR-A5JZ	ACC	60	MALE	WHITE	Stage II	[Not Applicable]	Adrenocortical carcinoma- Usual Type	[Not Available]	2011	[Not Available]	-22218	Alive	WITH TUMOR	822	#N/A	[Not Available]	Distant Metastasis	Liver	#N/A	247	Progressive Disease	#N/A	#N/A	0	822	0	822	#N/A	#N/A	1	247
35	TCGA-OR-A5K0	ACC	69	FEMALE	WHITE	Stage II	[Not Applicable]	Adrenocortical carcinoma- Usual Type	[Not Available]	2009	[Not Available]	-25400	Alive	WITH TUMOR	1029	#N/A	[Not Available]	Distant Metastasis	Lung	#N/A	659	Progressive Disease	#N/A	#N/A	0	1029	0	1029	#N/A	#N/A	1	659
36	TCGA-OR-A5K1	ACC	48	MALE	WHITE	Stage II	[Not Applicable]	Adrenocortical carcinoma- Usual Type	[Not Available]	2006	[Not Available]	-17596	Alive	TUMOR FREE	3289	#N/A	[Not Available]	Locoregional Recurrence	Peritoneal Surfaces	#N/A	826	Complete Remission/Response	#N/A	#N/A	0	3289	0	3289	1	826	1	826
37	TCGA-OR-A5K2	ACC	32	FEMALE	WHITE	Stage III	[Not Applicable]	Adrenocortical carcinoma- Usual Type	[Not Available]	2010	[Not Available]	-11970	Dead	WITH TUMOR	#N/A	994	[Not Available]	Distant Metastasis	Lung	#N/A	97	Progressive Disease	#N/A	#N/A	1	994	1	994	#N/A	#N/A	1	97
38	TCGA-OR-A5K3	ACC	53	MALE	WHITE	Stage II	[Not Applicable]	Adrenocortical Carcinoma- Oncocytic Type	[Not Available]	2005	[Not Available]	-19375	Alive	TUMOR FREE	3465	#N/A	[Not Available]	#N/A	#N/A	#N/A	#N/A	Complete Remission/Response	#N/A	#N/A	0	3465	0	3465	0	3465	0	3465
39	TCGA-OR-A5K4	ACC	64	FEMALE	WHITE	Stage III	[Not Applicable]	Adrenocortical carcinoma- Usual Type	[Not Available]	2011	[Not Available]	-23481	Alive	TUMOR FREE	1082	#N/A	[Not Available]	#N/A	#N/A	#N/A	#N/A	Complete Remission/Response	#N/A	#N/A	0	1082	0	1082	0	1082	0	1082
40	TCGA-OR-A5K5	ACC	59	FEMALE	WHITE	Stage III	[Not Applicable]	Adrenocortical carcinoma- Usual Type	[Not Available]	2012	[Not Available]	-21907	Dead	WITH TUMOR	#N/A	498	[Not Available]	Distant Metastasis	Lung	#N/A	108	Progressive Disease	#N/A	#N/A	1	498	1	498	#N/A	#N/A	1	108
41	TCGA-OR-A5K6	ACC	56	FEMALE	WHITE	Stage II	[Not Applicable]	Adrenocortical carcinoma- Usual Type	[Not Available]	2010	[Not Available]	-20657	Alive	WITH TUMOR	1493	#N/A	[Not Available]	Distant Metastasis	Liver	#N/A	391	Complete Remission/Response	#N/A	#N/A	0	1493	0	1493	1	391	1	391
42	TCGA-OR-A5K8	ACC	39	MALE	WHITE	Stage II	[Not Applicable]	Adrenocortical carcinoma- Usual Type	[Not Available]	2012	[Not Available]	-14435	Alive	TUMOR FREE	749	#N/A	[Not Available]	#N/A	#N/A	#N/A	#N/A	Complete Remission/Response	#N/A	#N/A	0	749	0	749	0	749	0	749
43	TCGA-OR-A5K9	ACC	61	FEMALE	WHITE	Stage II	[Not Applicable]	Adrenocortical carcinoma- Usual Type	[Not Available]	2002	[Not Available]	-22596	Dead	WITH TUMOR	#N/A	344	[Not Available]	Locoregional Recurrence	Peritoneal Surfaces	#N/A	236	[Not Available]	#N/A	#N/A	1	344	1	344	#N/A	#N/A	1	236
44	TCGA-OR-A5KB	ACC	61	FEMALE	WHITE	Stage II	[Not Applicable]	Adrenocortical carcinoma- Usual Type	[Not Available]	2011	[Not Available]	-22550	Alive	WITH TUMOR	741	#N/A	[Not Available]	Distant Metastasis	Soft Tissue	#N/A	214	Progressive Disease	#N/A	#N/A	0	741	0	741	#N/A	#N/A	1	214
45	TCGA-OR-A5KO	ACC	39	FEMALE	WHITE	Stage IV	[Not Applicable]	Adrenocortical carcinoma- Usual Type	[Not Available]	2009	[Not Available]	-14606	Alive	WITH TUMOR	1414	#N/A	[Not Available]	Distant Metastasis	Lung	#N/A	541	Progressive Disease	#N/A	#N/A	0	1414	0	1414	#N/A	#N/A	1	541
46	TCGA-OR-A5KP	ACC	45	FEMALE	WHITE	Stage II	[Not Applicable]	Adrenocortical carcinoma- Usual Type	[Not Available]	2006	[Not Available]	-16702	Alive	TUMOR FREE	2777	#N/A	[Not Available]	Distant Metastasis	Liver	#N/A	1250	Complete Remission/Response	#N/A	#N/A	0	2777	0	2777	1	1250	1	1250
47	TCGA-OR-A5KQ	ACC	20	FEMALE	WHITE	Stage II	[Not Applicable]	Adrenocortical carcinoma- Usual Type	[Not Available]	2006	[Not Available]	-7459	Alive	TUMOR FREE	2677	#N/A	[Not Available]	#N/A	#N/A	#N/A	#N/A	Complete Remission/Response	#N/A	#N/A	0	2677	0	2677	0	2677	0	2677
48	TCGA-OR-A5KS	ACC	72	MALE	WHITE	Stage II	[Not Applicable]	Adrenocortical carcinoma- Usual Type	[Not Available]	2006	[Not Available]	-26404	Alive	TUMOR FREE	2549	#N/A	[Not Available]	#N/A	#N/A	#N/A	#N/A	Complete Remission/Response	#N/A	#N/A	0	2549	0	2549	0	2549	0	2549
49	TCGA-OR-A5KT	ACC	44	FEMALE	WHITE	Stage I	[Not Applicable]	Adrenocortical carcinoma- Usual Type	[Not Available]	2006	[Not Available]	-16217	Alive	TUMOR FREE	2895	#N/A	[Not Available]	Distant Metastasis	Other, specify	Pancreas	2099	Complete Remission/Response	#N/A	#N/A	0	2895	0	2895	1	2099	1	2099
50	TCGA-OR-A5KU	ACC	37	FEMALE	WHITE	Stage II	[Not Applicable]	Adrenocortical carcinoma- Usual Type	[Not Available]	2000	[Not Available]	-13559	Alive	TUMOR FREE	4673	#N/A	[Not Available]	#N/A	#N/A	#N/A	#N/A	Complete Remission/Response	#N/A	#N/A	0	4673	0	4673	0	4673	0	4673
51	TCGA-OR-A5KV	ACC	17	FEMALE	WHITE	Stage III	[Not Applicable]	Adrenocortical carcinoma- Usual Type	[Not Available]	2003	[Not Available]	-6250	Alive	TUMOR FREE	3878	#N/A	[Not Available]	Distant Metastasis	Lung	#N/A	1116	Complete Remission/Response	#N/A	#N/A	0	3878	0	3878	1	1116	1	1116
52	TCGA-OR-A5KW	ACC	55	FEMALE	WHITE	Stage III	[Not Applicable]	Adrenocortical carcinoma- Usual Type	[Not Available]	2009	[Not Available]	-20328	Alive	TUMOR FREE	2076	#N/A	[Not Available]	#N/A	#N/A	#N/A	#N/A	Complete Remission/Response	#N/A	#N/A	0	2076	0	2076	0	2076	0	2076
53	TCGA-OR-A5KX	ACC	25	FEMALE	WHITE	Stage III	[Not Applicable]	Adrenocortical carcinoma- Usual Type	[Not Available]	2010	[Not Available]	-9298	Alive	WITH TUMOR	1364	#N/A	[Not Available]	Distant Metastasis	Bone	#N/A	62	Progressive Disease	#N/A	#N/A	0	1364	0	1364	#N/A	#N/A	1	62
54	TCGA-OR-A5KY	ACC	23	FEMALE	WHITE	Stage IV	[Not Applicable]	Adrenocortical carcinoma- Usual Type	[Not Available]	2010	[Not Available]	-8745	Dead	WITH TUMOR	#N/A	391	[Not Available]	Locoregional Recurrence	Peritoneal Surfaces	#N/A	178	Progressive Disease	#N/A	#N/A	1	391	1	391	#N/A	#N/A	1	178
55	TCGA-OR-A5KZ	ACC	42	MALE	WHITE	Stage II	[Not Applicable]	Adrenocortical carcinoma- Usual Type	[Not Available]	2012	[Not Available]	-15594	Dead	WITH TUMOR	#N/A	125	[Not Available]	Locoregional Recurrence	Other, specify	abdomen	36	Progressive Disease	#N/A	#N/A	1	125	1	125	#N/A	#N/A	1	36
56	TCGA-OR-A5L1	ACC	37	FEMALE	WHITE	Stage II	[Not Applicable]	Adrenocortical carcinoma- Usual Type	[Not Available]	2000	[Not Available]	-13840	Alive	WITH TUMOR	1781	#N/A	[Not Available]	Distant Metastasis	Bone	#N/A	685	Complete Remission/Response	#N/A	#N/A	0	1781	0	1781	1	685	1	685
57	TCGA-OR-A5L2	ACC	83	FEMALE	WHITE	Stage II	[Not Applicable]	Adrenocortical carcinoma- Usual Type	[Not Available]	2001	[Not Available]	-30535	Dead	TUMOR FREE	#N/A	1852	[Not Available]	#N/A	#N/A	#N/A	#N/A	Complete Remission/Response	#N/A	#N/A	1	1852	0	1852	0	1852	0	1852
58	TCGA-OR-A5L3	ACC	67	FEMALE	WHITE	Stage I	[Not Applicable]	Adrenocortical carcinoma- Usual Type	[Not Available]	2000	[Not Available]	-24763	Alive	TUMOR FREE	4628	#N/A	[Not Available]	#N/A	#N/A	#N/A	#N/A	Complete Remission/Response	#N/A	#N/A	0	4628	0	4628	0	4628	0	4628
59	TCGA-OR-A5L4	ACC	48	FEMALE	WHITE	Stage III	[Not Applicable]	Adrenocortical carcinoma- Usual Type	[Not Available]	2011	[Not Available]	-17819	Alive	TUMOR FREE	967	#N/A	[Not Available]	#N/A	#N/A	#N/A	#N/A	Complete Remission/Response	#N/A	#N/A	0	967	0	967	0	967	0	967
60	TCGA-OR-A5L5	ACC	77	FEMALE	WHITE	Stage I	[Not Applicable]	Adrenocortical carcinoma- Usual Type	[Not Available]	2010	[Not Available]	-28270	Alive	TUMOR FREE	1317	#N/A	[Not Available]	#N/A	#N/A	#N/A	#N/A	Complete Remission/Response	#N/A	#N/A	0	1317	0	1317	0	1317	0	1317
61	TCGA-OR-A5L6	ACC	60	MALE	WHITE	Stage II	[Not Applicable]	Adrenocortical carcinoma- Usual Type	[Not Available]	2011	[Not Available]	-22057	Alive	TUMOR FREE	861	#N/A	[Not Available]	#N/A	#N/A	#N/A	#N/A	Complete Remission/Response	#N/A	#N/A	0	861	0	861	0	861	0	861
62	TCGA-OR-A5L8	ACC	36	FEMALE	WHITE	Stage II	[Not Applicable]	Adrenocortical carcinoma- Usual Type	[Not Available]	2011	[Not Available]	-13472	Alive	TUMOR FREE	885	#N/A	[Not Available]	#N/A	#N/A	#N/A	#N/A	Complete Remission/Response	#N/A	#N/A	0	885	0	885	0	885	0	885
63	TCGA-OR-A5L9	ACC	53	FEMALE	WHITE	Stage II	[Not Applicable]	Adrenocortical carcinoma- Usual Type	[Not Available]	2011	[Not Available]	-19526	Alive	TUMOR FREE	871	#N/A	[Not Available]	#N/A	#N/A	#N/A	#N/A	Complete Remission/Response	#N/A	#N/A	0	871	0	871	0	871	0	871
64	TCGA-OR-A5LA	ACC	52	FEMALE	WHITE	Stage II	[Not Applicable]	Adrenocortical carcinoma- Usual Type	[Not Available]	2012	[Not Available]	-19242	Alive	TUMOR FREE	719	#N/A	[Not Available]	#N/A	#N/A	#N/A	#N/A	Complete Remission/Response	#N/A	#N/A	0	719	0	719	0	719	0	719
65	TCGA-OR-A5LB	ACC	59	MALE	WHITE	Stage IV	[Not Applicable]	Adrenocortical carcinoma- Usual Type	[Not Available]	2006	[Not Available]	-21565	Dead	WITH TUMOR	#N/A	1204	[Not Available]	Distant Metastasis	Liver	#N/A	611	Progressive Disease	#N/A	#N/A	1	1204	1	1204	#N/A	#N/A	1	611
66	TCGA-OR-A5LC	ACC	71	FEMALE	WHITE	Stage IV	[Not Applicable]	Adrenocortical carcinoma- Usual Type	[Not Available]	2011	[Not Available]	-26084	Dead	WITH TUMOR	#N/A	159	[Not Available]	Distant Metastasis	Lung	#N/A	50	Progressive Disease	#N/A	#N/A	1	159	1	159	#N/A	#N/A	1	50
67	TCGA-OR-A5LD	ACC	52	MALE	WHITE	Stage III	[Not Applicable]	Adrenocortical carcinoma- Usual Type	[Not Available]	1998	[Not Available]	-19111	Dead	WITH TUMOR	#N/A	1197	[Not Available]	Distant Metastasis	Lung	#N/A	444	[Unknown]	#N/A	#N/A	1	1197	1	1197	#N/A	#N/A	1	444
68	TCGA-OR-A5LE	ACC	14	MALE	WHITE	Stage II	[Not Applicable]	Adrenocortical carcinoma- Usual Type	[Not Available]	1997	[Not Available]	-5383	Dead	WITH TUMOR	#N/A	662	[Not Available]	Locoregional Recurrence	Peritoneal Surfaces	#N/A	265	[Unknown]	#N/A	#N/A	1	662	1	662	#N/A	#N/A	1	265
69	TCGA-OR-A5LF	ACC	74	FEMALE	WHITE	Stage III	[Not Applicable]	Adrenocortical carcinoma- Usual Type	[Not Available]	2002	[Not Available]	-27179	Dead	TUMOR FREE	#N/A	445	[Not Available]	#N/A	#N/A	#N/A	#N/A	Complete Remission/Response	#N/A	#N/A	1	445	0	445	0	445	0	445
70	TCGA-OR-A5LG	ACC	46	MALE	WHITE	Stage III	[Not Applicable]	Adrenocortical carcinoma- Usual Type	[Not Available]	2008	[Not Available]	-16875	Alive	WITH TUMOR	1589	#N/A	[Not Available]	Distant Metastasis	Lung	#N/A	1393	Complete Remission/Response	#N/A	#N/A	0	1589	0	1589	1	1393	1	1393
71	TCGA-OR-A5LH	ACC	36	FEMALE	WHITE	Stage II	[Not Applicable]	Adrenocortical carcinoma- Usual Type	[Not Available]	2005	[Not Available]	-13182	Dead	WITH TUMOR	#N/A	2385	[Not Available]	#N/A	#N/A	#N/A	#N/A	Progressive Disease	#N/A	#N/A	1	2385	1	2385	#N/A	#N/A	1	2385
72	TCGA-OR-A5LI	ACC	42	FEMALE	WHITE	Stage IV	[Not Applicable]	Adrenocortical carcinoma- Usual Type	[Not Available]	1998	[Not Available]	-15536	Dead	WITH TUMOR	#N/A	436	[Not Available]	Distant Metastasis	Bone	#N/A	61	Progressive Disease	#N/A	#N/A	1	436	1	436	#N/A	#N/A	1	61
73	TCGA-OR-A5LJ	ACC	54	FEMALE	WHITE	Stage IV	[Not Applicable]	Adrenocortical carcinoma- Usual Type	[Not Available]	2005	[Not Available]	-20069	Dead	WITH TUMOR	#N/A	1105	[Not Available]	Distant Metastasis	Lung	#N/A	98	Progressive Disease	#N/A	#N/A	1	1105	1	1105	#N/A	#N/A	1	98
74	TCGA-OR-A5LK	ACC	62	MALE	[Not Evaluated]	Stage II	[Not Applicable]	Adrenocortical Carcinoma- Oncocytic Type	[Not Available]	2007	[Not Available]	-22919	Alive	TUMOR FREE	2740	#N/A	[Not Available]	#N/A	#N/A	#N/A	#N/A	Complete Remission/Response	#N/A	#N/A	0	2740	0	2740	0	2740	0	2740
75	TCGA-OR-A5LL	ACC	75	FEMALE	[Not Evaluated]	Stage II	[Not Applicable]	Adrenocortical carcinoma- Usual Type	[Not Available]	2007	[Not Available]	-27607	Dead	WITH TUMOR	#N/A	1613	[Not Available]	Distant Metastasis	Liver	#N/A	213	Complete Remission/Response	#N/A	#N/A	1	1613	1	1613	1	213	1	213
76	TCGA-OR-A5LM	ACC	23	MALE	[Not Evaluated]	Stage II	[Not Applicable]	Adrenocortical carcinoma- Usual Type	[Not Available]	2008	[Not Available]	-8735	Alive	TUMOR FREE	1858	#N/A	[Not Available]	#N/A	#N/A	#N/A	#N/A	Complete Remission/Response	#N/A	#N/A	0	1858	0	1858	0	1858	0	1858
77	TCGA-OR-A5LN	ACC	31	FEMALE	[Not Evaluated]	Stage II	[Not Applicable]	Adrenocortical carcinoma- Usual Type	[Not Available]	2008	[Not Available]	-11414	Alive	TUMOR FREE	2342	#N/A	[Not Available]	#N/A	#N/A	#N/A	#N/A	Complete Remission/Response	#N/A	#N/A	0	2342	0	2342	0	2342	0	2342
78	TCGA-OR-A5LO	ACC	61	FEMALE	[Not Evaluated]	Stage II	[Not Applicable]	Adrenocortical carcinoma- Usual Type	[Not Available]	2008	[Not Available]	-22370	Dead	WITH TUMOR	#N/A	2405	[Not Available]	Distant Metastasis	Lung	#N/A	153	Complete Remission/Response	#N/A	#N/A	1	2405	1	2405	1	153	1	153
79	TCGA-OR-A5LP	ACC	37	FEMALE	[Not Evaluated]	Stage II	[Not Applicable]	Adrenocortical carcinoma- Usual Type	[Not Available]	2009	[Not Available]	-13574	Alive	TUMOR FREE	1857	#N/A	[Not Available]	#N/A	#N/A	#N/A	#N/A	Complete Remission/Response	#N/A	#N/A	0	1857	0	1857	0	1857	0	1857
80	TCGA-OR-A5LR	ACC	30	FEMALE	[Not Evaluated]	Stage II	[Not Applicable]	Adrenocortical carcinoma- Usual Type	[Not Available]	2011	[Not Available]	-11261	Alive	TUMOR FREE	853	#N/A	[Not Available]	#N/A	#N/A	#N/A	#N/A	Complete Remission/Response	#N/A	#N/A	0	853	0	853	0	853	0	853
81	TCGA-OR-A5LS	ACC	34	FEMALE	[Not Evaluated]	Stage II	[Not Applicable]	Adrenocortical carcinoma- Usual Type	[Not Available]	2011	[Not Available]	-12663	Alive	TUMOR FREE	1096	#N/A	[Not Available]	#N/A	#N/A	#N/A	#N/A	Complete Remission/Response	#N/A	#N/A	0	1096	0	1096	0	1096	0	1096
82	TCGA-OR-A5LT	ACC	57	MALE	[Not Evaluated]	Stage III	[Not Applicable]	Adrenocortical carcinoma- Usual Type	[Not Available]	2012	[Not Available]	-21032	Alive	TUMOR FREE	549	#N/A	[Not Available]	#N/A	#N/A	#N/A	#N/A	Complete Remission/Response	#N/A	#N/A	0	549	0	549	0	549	0	549
83	TCGA-OU-A5PI	ACC	53	FEMALE	WHITE	Stage IV	[Not Applicable]	Adrenocortical carcinoma- Usual Type	[Not Available]	2011	[Not Available]	-19492	Alive	WITH TUMOR	1171	#N/A	[Not Available]	Distant Metastasis	Lung	#N/A	351	Stable Disease	#N/A	#N/A	0	1171	0	1171	#N/A	#N/A	1	351
84	TCGA-P6-A5OF	ACC	55	FEMALE	WHITE	Stage III	[Not Applicable]	Adrenocortical carcinoma- Usual Type	[Not Available]	2010	[Not Available]	-20106	Dead	WITH TUMOR	#N/A	207	[Not Available]	Distant Metastasis	Lung	#N/A	143	[Unknown]	#N/A	#N/A	1	207	1	207	#N/A	#N/A	1	143
85	TCGA-P6-A5OG	ACC	45	FEMALE	WHITE	Stage IV	[Not Applicable]	Adrenocortical carcinoma- Usual Type	[Not Available]	2011	[Not Available]	-16659	Dead	WITH TUMOR	#N/A	383	[Not Available]	Distant Metastasis	Lung	#N/A	11	Complete Remission/Response	#N/A	#N/A	1	383	1	383	#N/A	#N/A	1	11
86	TCGA-P6-A5OH	ACC	59	FEMALE	WHITE	Stage IV	[Not Applicable]	Adrenocortical carcinoma- Usual Type	[Not Available]	2010	[Not Available]	-21627	Dead	WITH TUMOR	#N/A	0	[Not Available]	#N/A	#N/A	#N/A	#N/A	[Not Available]	#N/A	#N/A	1	0	1	0	#N/A	#N/A	1	0
87	TCGA-PA-A5YG	ACC	51	MALE	WHITE	Stage II	[Not Applicable]	Adrenocortical carcinoma- Usual Type	[Not Available]	2012	[Not Available]	-18926	Alive	TUMOR FREE	756	#N/A	[Not Available]	#N/A	#N/A	#N/A	#N/A	Complete Remission/Response	#N/A	#N/A	0	756	0	756	0	756	0	756
88	TCGA-PK-A5H8	ACC	42	MALE	WHITE	Stage II	[Not Applicable]	Adrenocortical carcinoma- Usual Type	[Not Available]	2004	[Not Available]	-15373	Alive	TUMOR FREE	3623	#N/A	[Not Available]	#N/A	#N/A	#N/A	#N/A	Complete Remission/Response	#N/A	#N/A	0	3623	0	3623	0	3623	0	3623
89	TCGA-PK-A5H9	ACC	27	FEMALE	ASIAN	Stage II	[Not Applicable]	Adrenocortical carcinoma- Usual Type	[Not Available]	2012	[Not Available]	-10173	Alive	TUMOR FREE	616	#N/A	[Not Available]	#N/A	#N/A	#N/A	#N/A	Complete Remission/Response	#N/A	#N/A	0	616	0	616	0	616	0	616
90	TCGA-PK-A5HA	ACC	63	MALE	[Unknown]	Stage I	[Not Applicable]	Adrenocortical carcinoma- Usual Type	[Not Available]	2011	[Not Available]	-23345	Alive	TUMOR FREE	1201	#N/A	[Not Available]	#N/A	#N/A	#N/A	#N/A	Complete Remission/Response	#N/A	#N/A	0	1201	0	1201	0	1201	0	1201
91	TCGA-PK-A5HB	ACC	63	MALE	[Unknown]	[Not Available]	[Not Applicable]	Adrenocortical carcinoma- Usual Type	[Not Available]	2003	[Not Available]	-23293	Alive	WITH TUMOR	1293	#N/A	[Not Available]	Distant Metastasis	Lung	#N/A	213	[Not Available]	#N/A	#N/A	0	1293	0	1293	#N/A	#N/A	1	213
92	TCGA-PK-A5HC	ACC	44	FEMALE	ASIAN	Stage III	[Not Applicable]	Adrenocortical carcinoma- Usual Type	[Not Available]	2011	[Not Available]	-16182	Alive	WITH TUMOR	679	#N/A	[Not Available]	Distant Metastasis	Lung	#N/A	131	Complete Remission/Response	#N/A	#N/A	0	679	0	679	1	131	1	131
93	TCGA-2F-A9KO	BLCA	63	MALE	WHITE	Stage IV	[Not Applicable]	Muscle invasive urothelial carcinoma (pT2 or above)	High Grade	2008	[Not Available]	-23323	Dead	WITH TUMOR	#N/A	734	[Not Available]	Distant Metastasis	Liver	#N/A	651	Progressive Disease	#N/A	#N/A	1	734	1	734	#N/A	#N/A	1	651
94	TCGA-2F-A9KP	BLCA	66	MALE	WHITE	Stage IV	[Not Applicable]	Muscle invasive urothelial carcinoma (pT2 or above)	High Grade	2011	[Not Available]	-24428	Dead	WITH TUMOR	#N/A	364	[Not Available]	Distant Metastasis	Liver	#N/A	343	Progressive Disease	#N/A	#N/A	1	364	1	364	#N/A	#N/A	1	343
95	TCGA-2F-A9KQ	BLCA	69	MALE	WHITE	Stage III	[Not Applicable]	Muscle invasive urothelial carcinoma (pT2 or above)	High Grade	2007	[Not Available]	-25259	Alive	TUMOR FREE	2886	#N/A	[Not Available]	#N/A	#N/A	#N/A	#N/A	Complete Remission/Response	#N/A	#N/A	0	2886	0	2886	0	2886	0	2886
96	TCGA-2F-A9KR	BLCA	59	FEMALE	[Not Evaluated]	Stage III	[Not Applicable]	Muscle invasive urothelial carcinoma (pT2 or above)	High Grade	2000	[Not Available]	-21848	Dead	WITH TUMOR	#N/A	3183	[Not Available]	Distant Metastasis	Lung	#N/A	3086	Complete Remission/Response	#N/A	#N/A	1	3183	1	3183	1	3086	1	3086
97	TCGA-2F-A9KT	BLCA	83	MALE	WHITE	Stage II	[Not Applicable]	Muscle invasive urothelial carcinoma (pT2 or above)	High Grade	2006	[Not Available]	-30520	Alive	TUMOR FREE	3314	#N/A	[Not Available]	#N/A	#N/A	#N/A	#N/A	Complete Remission/Response	#N/A	#N/A	0	3314	0	3314	0	3314	0	3314
98	TCGA-2F-A9KW	BLCA	67	FEMALE	WHITE	Stage III	[Not Applicable]	Muscle invasive urothelial carcinoma (pT2 or above)	High Grade	2013	[Not Available]	-24703	Dead	WITH TUMOR	#N/A	254	[Not Available]	Distant Metastasis	Bone	#N/A	85	Stable Disease	#N/A	#N/A	1	254	1	254	#N/A	#N/A	1	85
99	TCGA-4Z-AA7M	BLCA	65	MALE	WHITE	Stage III	[Not Applicable]	Muscle invasive urothelial carcinoma (pT2 or above)	High Grade	2013	[Not Available]	-23817	Alive	TUMOR FREE	495	#N/A	[Not Available]	#N/A	#N/A	#N/A	#N/A	Complete Remission/Response	#N/A	#N/A	0	495	0	495	0	495	0	495
100	TCGA-4Z-AA7N	BLCA	65	MALE	WHITE	Stage III	[Not Applicable]	Muscle invasive urothelial carcinoma (pT2 or above)	High Grade	2010	[Not Available]	-24090	Dead	TUMOR FREE	#N/A	1367	[Not Available]	#N/A	#N/A	#N/A	#N/A	Complete Remission/Response	#N/A	#N/A	1	1367	0	1367	0	1367	0	1367
101	TCGA-4Z-AA7O	BLCA	64	MALE	BLACK OR AFRICAN AMERICAN	Stage II	[Not Applicable]	Muscle invasive urothelial carcinoma (pT2 or above)	High Grade	2013	[Not Available]	-23645	Alive	TUMOR FREE	512	#N/A	[Not Available]	#N/A	#N/A	#N/A	#N/A	Complete Remission/Response	#N/A	#N/A	0	512	0	512	0	512	0	512
102	TCGA-4Z-AA7Q	BLCA	79	MALE	WHITE	Stage III	[Not Applicable]	Muscle invasive urothelial carcinoma (pT2 or above)	High Grade	2012	[Not Available]	-28981	Dead	TUMOR FREE	#N/A	510	[Not Available]	#N/A	#N/A	#N/A	#N/A	[Not Applicable]	#N/A	#N/A	1	510	0	510	#N/A	#N/A	0	510
103	TCGA-4Z-AA7R	BLCA	73	MALE	BLACK OR AFRICAN AMERICAN	Stage IV	[Not Applicable]	Muscle invasive urothelial carcinoma (pT2 or above)	High Grade	2010	[Not Available]	-26781	Dead	WITH TUMOR	#N/A	522	[Not Available]	Locoregional (Urothelial tumor event)	Lymph Node Only	#N/A	353	Partial Remission/Response	#N/A	#N/A	1	522	1	522	#N/A	#N/A	1	353
104	TCGA-4Z-AA7S	BLCA	66	MALE	BLACK OR AFRICAN AMERICAN	Stage III	[Not Applicable]	Muscle invasive urothelial carcinoma (pT2 or above)	High Grade	2010	[Not Available]	-24111	Dead	TUMOR FREE	#N/A	1064	[Not Available]	#N/A	#N/A	#N/A	#N/A	[Not Applicable]	#N/A	#N/A	1	1064	0	1064	#N/A	#N/A	0	1064
105	TCGA-4Z-AA7W	BLCA	55	MALE	WHITE	Stage II	[Not Applicable]	Muscle invasive urothelial carcinoma (pT2 or above)	High Grade	2012	[Not Available]	-20424	Alive	WITH TUMOR	840	#N/A	[Not Available]	Locoregional (Urothelial tumor event)	Other, specify	Rectum	760	Complete Remission/Response	#N/A	#N/A	0	840	0	840	1	760	1	760
106	TCGA-4Z-AA7Y	BLCA	60	MALE	WHITE	Stage II	[Not Applicable]	Muscle invasive urothelial carcinoma (pT2 or above)	High Grade	2010	[Not Available]	-22056	Alive	TUMOR FREE	1522	#N/A	[Not Available]	#N/A	#N/A	#N/A	#N/A	Complete Remission/Response	#N/A	#N/A	0	1522	0	1522	0	1522	0	1522
107	TCGA-4Z-AA80	BLCA	73	MALE	WHITE	Stage II	[Not Applicable]	Muscle invasive urothelial carcinoma (pT2 or above)	High Grade	2012	[Not Available]	-26873	Dead	TUMOR FREE	#N/A	19	[Not Available]	#N/A	#N/A	#N/A	#N/A	[Not Applicable]	#N/A	#N/A	1	19	0	19	#N/A	#N/A	0	19
108	TCGA-4Z-AA81	BLCA	80	MALE	WHITE	Stage II	[Not Applicable]	Muscle invasive urothelial carcinoma (pT2 or above)	High Grade	2010	[Not Available]	-29457	Dead	TUMOR FREE	#N/A	1270	[Not Available]	#N/A	#N/A	#N/A	#N/A	Complete Remission/Response	#N/A	#N/A	1	1270	0	1270	0	1270	0	1270
109	TCGA-4Z-AA82	BLCA	59	MALE	BLACK OR AFRICAN AMERICAN	Stage IV	[Not Applicable]	Muscle invasive urothelial carcinoma (pT2 or above)	High Grade	2010	[Not Available]	-21893	Dead	WITH TUMOR	#N/A	1556	[Not Available]	Distant Metastasis	Bone	#N/A	1150	Complete Remission/Response	#N/A	#N/A	1	1556	1	1556	#N/A	#N/A	1	1150
110	TCGA-4Z-AA83	BLCA	52	MALE	WHITE	Stage II	[Not Applicable]	Muscle invasive urothelial carcinoma (pT2 or above)	High Grade	2009	[Not Available]	-19280	Alive	TUMOR FREE	2024	#N/A	[Not Available]	#N/A	#N/A	#N/A	#N/A	Complete Remission/Response	#N/A	#N/A	0	2024	0	2024	0	2024	0	2024
111	TCGA-4Z-AA84	BLCA	61	MALE	WHITE	Stage IV	[Not Applicable]	Muscle invasive urothelial carcinoma (pT2 or above)	High Grade	2008	[Not Available]	-22397	Alive	WITH TUMOR	460	#N/A	[Not Available]	#N/A	#N/A	#N/A	#N/A	Progressive Disease	#N/A	#N/A	0	460	0	460	#N/A	#N/A	0	460
112	TCGA-4Z-AA86	BLCA	66	MALE	BLACK OR AFRICAN AMERICAN	Stage IV	[Not Applicable]	Muscle invasive urothelial carcinoma (pT2 or above)	High Grade	2009	[Not Available]	-24465	Dead	WITH TUMOR	#N/A	311	[Not Available]	Locoregional (Urothelial tumor event)	Other, specify	Pelvis	136	Complete Remission/Response	#N/A	#N/A	1	311	1	311	#N/A	#N/A	1	136
113	TCGA-4Z-AA87	BLCA	72	MALE	BLACK OR AFRICAN AMERICAN	Stage III	[Not Applicable]	Muscle invasive urothelial carcinoma (pT2 or above)	High Grade	2010	[Not Available]	-26430	Alive	WITH TUMOR	1454	#N/A	[Not Available]	Distant Metastasis	Bone	#N/A	221	[Unknown]	#N/A	#N/A	0	1454	0	1454	#N/A	#N/A	1	221
114	TCGA-4Z-AA89	BLCA	60	MALE	WHITE	Stage IV	[Not Applicable]	Muscle invasive urothelial carcinoma (pT2 or above)	High Grade	2011	[Not Available]	-22271	Alive	WITH TUMOR	1029	#N/A	[Not Available]	New Primary Tumor	Lung	#N/A	648	Complete Remission/Response	#N/A	#N/A	0	1029	0	1029	#N/A	#N/A	1	648
115	TCGA-5N-A9KI	BLCA	76	FEMALE	WHITE	Stage III	[Not Applicable]	Muscle invasive urothelial carcinoma (pT2 or above)	High Grade	2011	[Not Available]	-27777	Dead	TUMOR FREE	#N/A	76	[Not Available]	#N/A	#N/A	#N/A	#N/A	Complete Remission/Response	#N/A	#N/A	1	76	0	76	0	76	0	76
116	TCGA-5N-A9KM	BLCA	73	FEMALE	WHITE	Stage III	[Not Applicable]	Muscle invasive urothelial carcinoma (pT2 or above)	High Grade	2012	[Not Available]	-26906	Dead	WITH TUMOR	#N/A	530	[Not Available]	#N/A	#N/A	#N/A	276	Complete Remission/Response	#N/A	#N/A	1	530	1	530	1	276	1	276
117	TCGA-BL-A0C8	BLCA	73	MALE	WHITE	Stage I	[Not Applicable]	[Not Available]	High Grade	2009	[Not Available]	-26819	Alive	#N/A	1219	#N/A	[Not Available]	Locoregional (Urothelial tumor event)	Bladder	#N/A	630	Complete Remission/Response	#N/A	#N/A	0	1219	0	1219	1	630	1	630
118	TCGA-BL-A13I	BLCA	57	FEMALE	WHITE	Stage III	[Not Applicable]	Muscle invasive urothelial carcinoma (pT2 or above)	High Grade	2010	[Not Available]	-20885	Dead	WITH TUMOR	#N/A	223	[Not Available]	Metastatic	#N/A	#N/A	216	Progressive Disease	#N/A	#N/A	1	223	1	223	#N/A	#N/A	1	216
119	TCGA-BL-A13J	BLCA	65	MALE	WHITE	Stage IV	[Not Applicable]	Muscle invasive urothelial carcinoma (pT2 or above)	High Grade	2010	[Not Available]	-23927	Dead	WITH TUMOR	#N/A	81	[Not Available]	#N/A	#N/A	#N/A	#N/A	Stable Disease	#N/A	#N/A	1	81	1	81	#N/A	#N/A	1	81
120	TCGA-BL-A3JM	BLCA	62	MALE	WHITE	Stage III	[Not Applicable]	Muscle invasive urothelial carcinoma (pT2 or above)	High Grade	2010	[Not Available]	-23000	Dead	WITH TUMOR	#N/A	205	[Not Available]	Metastatic	Bone	#N/A	111	Progressive Disease	#N/A	#N/A	1	205	1	205	#N/A	#N/A	1	111
121	TCGA-BL-A5ZZ	BLCA	80	FEMALE	WHITE	Stage III	[Not Applicable]	Muscle invasive urothelial carcinoma (pT2 or above)	High Grade	2012	[Not Available]	-29247	Alive	WITH TUMOR	377	#N/A	[Not Available]	Distant Metastasis	Lung	#N/A	242	Complete Remission/Response	#N/A	#N/A	0	377	0	377	1	242	1	242
122	TCGA-BT-A0S7	BLCA	75	MALE	WHITE	Stage III	[Not Applicable]	Muscle invasive urothelial carcinoma (pT2 or above)	High Grade	2007	[Not Available]	-27533	Dead	WITH TUMOR	#N/A	200	[Not Available]	#N/A	#N/A	#N/A	#N/A	Progressive Disease	#N/A	#N/A	1	200	1	200	#N/A	#N/A	1	200
123	TCGA-BT-A0YX	BLCA	70	FEMALE	WHITE	Stage III	[Not Applicable]	Muscle invasive urothelial carcinoma (pT2 or above)	High Grade	2009	[Not Available]	-25570	Dead	WITH TUMOR	#N/A	400	[Not Available]	Metastatic	Other, specify	lower abdominal wall and right pelvis	326	Progressive Disease	#N/A	#N/A	1	400	1	400	#N/A	#N/A	1	326
124	TCGA-BT-A20J	BLCA	75	MALE	WHITE	Stage II	[Not Applicable]	Muscle invasive urothelial carcinoma (pT2 or above)	High Grade	1999	[Not Available]	-27646	Dead	WITH TUMOR	#N/A	579	[Not Available]	Distant Metastasis	Other, specify	Adrenal	254	Progressive Disease	#N/A	#N/A	1	579	1	579	#N/A	#N/A	1	254
125	TCGA-BT-A20N	BLCA	72	MALE	[Not Available]	Stage III	[Not Applicable]	Muscle invasive urothelial carcinoma (pT2 or above)	High Grade	2003	[Not Available]	-26456	Dead	WITH TUMOR	#N/A	795	[Not Available]	#N/A	#N/A	#N/A	#N/A	Progressive Disease	#N/A	#N/A	1	795	1	795	#N/A	#N/A	1	795
126	TCGA-BT-A20O	BLCA	75	MALE	WHITE	Stage III	[Not Applicable]	Muscle invasive urothelial carcinoma (pT2 or above)	High Grade	2003	[Not Available]	-27534	Dead	WITH TUMOR	#N/A	370	[Not Available]	Locoregional (Urothelial tumor event)	Lymph Node Only	#N/A	315	Progressive Disease	#N/A	#N/A	1	370	1	370	#N/A	#N/A	1	315
127	TCGA-BT-A20P	BLCA	81	FEMALE	WHITE	Stage III	[Not Applicable]	Muscle invasive urothelial carcinoma (pT2 or above)	High Grade	2005	[Not Available]	-29634	Dead	#N/A	#N/A	544	[Not Available]	#N/A	#N/A	#N/A	#N/A	[Not Available]	#N/A	#N/A	1	544	#N/A	544	#N/A	#N/A	0	544
128	TCGA-BT-A20Q	BLCA	73	MALE	WHITE	Stage IV	[Not Applicable]	Muscle invasive urothelial carcinoma (pT2 or above)	High Grade	2006	[Not Available]	-26778	Dead	WITH TUMOR	#N/A	593	[Not Available]	#N/A	#N/A	#N/A	#N/A	Progressive Disease	#N/A	#N/A	1	593	1	593	#N/A	#N/A	1	593
129	TCGA-BT-A20R	BLCA	79	FEMALE	WHITE	Stage IV	[Not Applicable]	Muscle invasive urothelial carcinoma (pT2 or above)	High Grade	2006	[Not Available]	-28987	Dead	#N/A	#N/A	154	[Not Available]	#N/A	#N/A	#N/A	#N/A	[Not Available]	#N/A	#N/A	1	154	#N/A	154	#N/A	#N/A	0	154
130	TCGA-BT-A20T	BLCA	63	MALE	WHITE	Stage IV	[Not Applicable]	Muscle invasive urothelial carcinoma (pT2 or above)	High Grade	2007	[Not Available]	-23220	Dead	WITH TUMOR	#N/A	453	[Not Available]	Distant Metastasis	Liver	#N/A	314	Progressive Disease	#N/A	#N/A	1	453	1	453	#N/A	#N/A	1	314
131	TCGA-BT-A20U	BLCA	70	FEMALE	WHITE	Stage III	[Not Applicable]	Muscle invasive urothelial carcinoma (pT2 or above)	High Grade	2008	[Not Available]	-25761	Dead	TUMOR FREE	#N/A	455	[Not Available]	#N/A	#N/A	#N/A	#N/A	Complete Remission/Response	#N/A	#N/A	1	455	0	455	0	455	0	455
132	TCGA-BT-A20V	BLCA	59	FEMALE	BLACK OR AFRICAN AMERICAN	Stage IV	[Not Applicable]	Muscle invasive urothelial carcinoma (pT2 or above)	High Grade	2008	[Not Available]	-21551	Dead	#N/A	#N/A	154	[Not Available]	#N/A	#N/A	#N/A	#N/A	[Not Available]	#N/A	#N/A	1	154	#N/A	154	#N/A	#N/A	0	154
133	TCGA-BT-A20W	BLCA	71	MALE	WHITE	Stage II	[Not Applicable]	Muscle invasive urothelial carcinoma (pT2 or above)	High Grade	2009	[Not Available]	-26078	Dead	TUMOR FREE	#N/A	254	[Not Available]	#N/A	#N/A	#N/A	#N/A	Complete Remission/Response	#N/A	#N/A	1	254	0	254	0	254	0	254
134	TCGA-BT-A20X	BLCA	56	MALE	WHITE	Stage IV	[Not Applicable]	Muscle invasive urothelial carcinoma (pT2 or above)	High Grade	2009	[Not Available]	-20519	Dead	WITH TUMOR	#N/A	251	[Not Available]	#N/A	#N/A	#N/A	#N/A	Progressive Disease	#N/A	#N/A	1	251	1	251	#N/A	#N/A	1	251
135	TCGA-BT-A2LA	BLCA	54	MALE	WHITE	Stage III	[Not Applicable]	Muscle invasive urothelial carcinoma (pT2 or above)	High Grade	2010	[Not Available]	-20032	Alive	TUMOR FREE	522	#N/A	[Not Available]	#N/A	#N/A	#N/A	#N/A	Complete Remission/Response	#N/A	#N/A	0	522	0	522	0	522	0	522
136	TCGA-BT-A2LB	BLCA	73	FEMALE	WHITE	Stage III	[Not Applicable]	Muscle invasive urothelial carcinoma (pT2 or above)	High Grade	2010	[Not Available]	-26846	Dead	TUMOR FREE	#N/A	492	[Not Available]	#N/A	#N/A	#N/A	#N/A	Complete Remission/Response	#N/A	#N/A	1	492	0	492	0	492	0	492
137	TCGA-BT-A2LD	BLCA	78	FEMALE	WHITE	Stage IV	[Not Applicable]	Muscle invasive urothelial carcinoma (pT2 or above)	High Grade	2011	[Not Available]	-28673	Dead	WITH TUMOR	#N/A	623	[Not Available]	Distant Metastasis	Other, specify	brain and spinal cord	555	Progressive Disease	#N/A	#N/A	1	623	1	623	#N/A	#N/A	1	555
138	TCGA-BT-A3PH	BLCA	76	MALE	WHITE	Stage IV	[Not Applicable]	Muscle invasive urothelial carcinoma (pT2 or above)	High Grade	2010	[Not Available]	-28030	Dead	WITH TUMOR	#N/A	142	[Not Available]	#N/A	#N/A	#N/A	#N/A	Progressive Disease	#N/A	#N/A	1	142	1	142	#N/A	#N/A	1	142
139	TCGA-BT-A3PJ	BLCA	76	MALE	WHITE	Stage III	[Not Applicable]	Muscle invasive urothelial carcinoma (pT2 or above)	High Grade	2011	[Not Available]	-27821	Alive	TUMOR FREE	789	#N/A	[Not Available]	#N/A	#N/A	#N/A	#N/A	Complete Remission/Response	#N/A	#N/A	0	789	0	789	0	789	0	789
140	TCGA-BT-A3PK	BLCA	80	MALE	WHITE	Stage II	[Not Applicable]	Muscle invasive urothelial carcinoma (pT2 or above)	High Grade	2011	[Not Available]	-29314	Dead	WITH TUMOR	#N/A	303	[Not Available]	#N/A	#N/A	#N/A	#N/A	Stable Disease	#N/A	#N/A	1	303	1	303	#N/A	#N/A	1	303
141	TCGA-BT-A42B	BLCA	59	MALE	WHITE	Stage IV	[Not Applicable]	Muscle invasive urothelial carcinoma (pT2 or above)	High Grade	2011	[Not Available]	-21788	Dead	WITH TUMOR	#N/A	534	[Not Available]	#N/A	#N/A	#N/A	#N/A	Partial Remission/Response	#N/A	#N/A	1	534	1	534	#N/A	#N/A	1	534
142	TCGA-BT-A42C	BLCA	64	MALE	WHITE	Stage II	[Not Applicable]	Muscle invasive urothelial carcinoma (pT2 or above)	High Grade	2011	[Not Available]	-23584	Alive	TUMOR FREE	873	#N/A	[Not Available]	#N/A	#N/A	#N/A	#N/A	Complete Remission/Response	#N/A	#N/A	0	873	0	873	0	873	0	873
143	TCGA-BT-A42E	BLCA	74	MALE	WHITE	Stage III	[Not Applicable]	Muscle invasive urothelial carcinoma (pT2 or above)	High Grade	2012	[Not Available]	-27045	Alive	TUMOR FREE	1108	#N/A	[Not Available]	#N/A	#N/A	#N/A	#N/A	Complete Remission/Response	#N/A	#N/A	0	1108	0	1108	0	1108	0	1108
144	TCGA-BT-A42F	BLCA	64	MALE	WHITE	Stage IV	[Not Applicable]	Muscle invasive urothelial carcinoma (pT2 or above)	High Grade	2011	[Not Available]	-23713	Alive	TUMOR FREE	864	#N/A	[Not Available]	#N/A	#N/A	#N/A	#N/A	Complete Remission/Response	#N/A	#N/A	0	864	0	864	#N/A	#N/A	0	864
145	TCGA-C4-A0EZ	BLCA	69	FEMALE	[Not Available]	Stage IV	[Not Applicable]	Muscle invasive urothelial carcinoma (pT2 or above)	High Grade	2006	[Not Available]	-25202	Dead	WITH TUMOR	#N/A	273	[Not Available]	#N/A	#N/A	#N/A	#N/A	Partial Remission/Response	#N/A	#N/A	1	273	1	273	#N/A	#N/A	1	273	Redacted
146	TCGA-C4-A0F0	BLCA	60	MALE	[Not Available]	Stage II	[Not Applicable]	Muscle invasive urothelial carcinoma (pT2 or above)	High Grade	2007	[Not Available]	-22068	Alive	TUMOR FREE	59	#N/A	[Not Available]	#N/A	#N/A	#N/A	#N/A	[Not Available]	#N/A	#N/A	0	59	0	59	#N/A	#N/A	0	59
147	TCGA-C4-A0F1	BLCA	71	MALE	[Not Available]	Stage III	[Not Applicable]	Muscle invasive urothelial carcinoma (pT2 or above)	High Grade	2006	[Not Available]	-26178	Alive	TUMOR FREE	89	#N/A	[Not Available]	#N/A	#N/A	#N/A	#N/A	[Not Available]	#N/A	#N/A	0	89	0	89	#N/A	#N/A	0	89	Redacted
148	TCGA-C4-A0F6	BLCA	82	FEMALE	[Not Available]	Stage III	[Not Applicable]	Muscle invasive urothelial carcinoma (pT2 or above)	High Grade	2008	[Not Available]	-29951	Alive	TUMOR FREE	700	#N/A	[Not Available]	#N/A	#N/A	#N/A	#N/A	[Not Available]	#N/A	#N/A	0	700	0	700	#N/A	#N/A	0	700
149	TCGA-C4-A0F7	BLCA	77	MALE	[Not Available]	Stage IV	[Not Applicable]	Muscle invasive urothelial carcinoma (pT2 or above)	High Grade	2008	[Not Available]	-28428	Dead	WITH TUMOR	#N/A	62	[Not Available]	#N/A	#N/A	#N/A	#N/A	[Not Available]	#N/A	#N/A	1	62	1	62	#N/A	#N/A	1	62	Redacted
150	TCGA-CF-A1HR	BLCA	62	MALE	ASIAN	Stage III	[Not Applicable]	Muscle invasive urothelial carcinoma (pT2 or above)	High Grade	2010	[Not Available]	-22777	Alive	WITH TUMOR	389	#N/A	[Not Available]	Distant Metastasis	Liver	#N/A	294	Complete Remission/Response	#N/A	#N/A	0	389	0	389	1	294	1	294
151	TCGA-CF-A1HS	BLCA	75	FEMALE	ASIAN	Stage III	[Not Applicable]	Muscle invasive urothelial carcinoma (pT2 or above)	High Grade	2010	[Not Available]	-27565	Alive	WITH TUMOR	382	#N/A	[Not Available]	Distant Metastasis	Other, specify	Pelvis	133	Complete Remission/Response	#N/A	#N/A	0	382	0	382	1	133	1	133
152	TCGA-CF-A27C	BLCA	52	MALE	ASIAN	Stage III	[Not Applicable]	Muscle invasive urothelial carcinoma (pT2 or above)	High Grade	2011	[Not Available]	-19270	Alive	TUMOR FREE	425	#N/A	[Not Available]	#N/A	#N/A	#N/A	#N/A	Complete Remission/Response	#N/A	#N/A	0	425	0	425	0	425	0	425
153	TCGA-CF-A3MF	BLCA	34	MALE	ASIAN	Stage III	[Not Applicable]	Muscle invasive urothelial carcinoma (pT2 or above)	Low Grade	2011	[Not Available]	-12557	Alive	TUMOR FREE	383	#N/A	[Not Available]	#N/A	#N/A	#N/A	#N/A	Complete Remission/Response	#N/A	#N/A	0	383	0	383	0	383	0	383
154	TCGA-CF-A3MG	BLCA	48	MALE	ASIAN	Stage II	[Not Applicable]	Muscle invasive urothelial carcinoma (pT2 or above)	Low Grade	2011	[Not Available]	-17600	Alive	TUMOR FREE	369	#N/A	[Not Available]	#N/A	#N/A	#N/A	#N/A	Complete Remission/Response	#N/A	#N/A	0	369	0	369	0	369	0	369
155	TCGA-CF-A3MH	BLCA	75	MALE	ASIAN	Stage II	[Not Applicable]	Muscle invasive urothelial carcinoma (pT2 or above)	Low Grade	2011	[Not Available]	-27458	Alive	TUMOR FREE	398	#N/A	[Not Available]	#N/A	#N/A	#N/A	#N/A	Complete Remission/Response	#N/A	#N/A	0	398	0	398	0	398	0	398
156	TCGA-CF-A3MI	BLCA	62	MALE	ASIAN	Stage II	[Not Applicable]	Muscle invasive urothelial carcinoma (pT2 or above)	Low Grade	2011	[Not Available]	-22716	Alive	TUMOR FREE	370	#N/A	[Not Available]	#N/A	#N/A	#N/A	#N/A	Complete Remission/Response	#N/A	#N/A	0	370	0	370	0	370	0	370
157	TCGA-CF-A47S	BLCA	41	MALE	ASIAN	Stage II	[Not Applicable]	Muscle invasive urothelial carcinoma (pT2 or above)	Low Grade	2011	[Not Available]	-15225	Alive	TUMOR FREE	333	#N/A	[Not Available]	#N/A	#N/A	#N/A	#N/A	Complete Remission/Response	#N/A	#N/A	0	333	0	333	0	333	0	333
158	TCGA-CF-A47T	BLCA	58	FEMALE	ASIAN	Stage II	[Not Applicable]	Muscle invasive urothelial carcinoma (pT2 or above)	Low Grade	2011	[Not Available]	-21347	Dead	WITH TUMOR	#N/A	385	[Not Available]	Distant Metastasis	Bone	#N/A	139	Complete Remission/Response	#N/A	#N/A	1	385	1	385	1	139	1	139
159	TCGA-CF-A47V	BLCA	52	MALE	ASIAN	Stage II	[Not Applicable]	Muscle invasive urothelial carcinoma (pT2 or above)	High Grade	2012	[Not Available]	-19265	Alive	TUMOR FREE	379	#N/A	[Not Available]	#N/A	#N/A	#N/A	#N/A	Complete Remission/Response	#N/A	#N/A	0	379	0	379	0	379	0	379
160	TCGA-CF-A47W	BLCA	42	MALE	ASIAN	Stage II	[Not Applicable]	Muscle invasive urothelial carcinoma (pT2 or above)	Low Grade	2012	[Not Available]	-15497	Alive	TUMOR FREE	368	#N/A	[Not Available]	#N/A	#N/A	#N/A	#N/A	Complete Remission/Response	#N/A	#N/A	0	368	0	368	0	368	0	368
161	TCGA-CF-A47X	BLCA	60	MALE	ASIAN	Stage II	[Not Applicable]	Muscle invasive urothelial carcinoma (pT2 or above)	Low Grade	2012	[Not Available]	-22200	Alive	TUMOR FREE	384	#N/A	[Not Available]	#N/A	#N/A	#N/A	#N/A	Complete Remission/Response	#N/A	#N/A	0	384	0	384	0	384	0	384
162	TCGA-CF-A47Y	BLCA	55	MALE	ASIAN	Stage II	[Not Applicable]	Muscle invasive urothelial carcinoma (pT2 or above)	Low Grade	2012	[Not Available]	-20432	Alive	TUMOR FREE	373	#N/A	[Not Available]	#N/A	#N/A	#N/A	#N/A	Complete Remission/Response	#N/A	#N/A	0	373	0	373	0	373	0	373
163	TCGA-CF-A5U8	BLCA	59	MALE	ASIAN	Stage II	[Not Applicable]	Muscle invasive urothelial carcinoma (pT2 or above)	Low Grade	2012	[Not Available]	-21734	Alive	TUMOR FREE	399	#N/A	[Not Available]	#N/A	#N/A	#N/A	#N/A	Complete Remission/Response	#N/A	#N/A	0	399	0	399	0	399	0	399
164	TCGA-CF-A5UA	BLCA	67	MALE	ASIAN	Stage II	[Not Applicable]	Muscle invasive urothelial carcinoma (pT2 or above)	Low Grade	2012	[Not Available]	-24625	Alive	TUMOR FREE	365	#N/A	[Not Available]	#N/A	#N/A	#N/A	#N/A	Complete Remission/Response	#N/A	#N/A	0	365	0	365	0	365	0	365
165	TCGA-CF-A7I0	BLCA	54	MALE	ASIAN	Stage II	[Not Applicable]	Muscle invasive urothelial carcinoma (pT2 or above)	Low Grade	2013	[Not Available]	-20059	Alive	TUMOR FREE	368	#N/A	[Not Available]	#N/A	#N/A	#N/A	#N/A	Complete Remission/Response	#N/A	#N/A	0	368	0	368	0	368	0	368
166	TCGA-CF-A8HX	BLCA	55	FEMALE	ASIAN	Stage II	[Not Applicable]	Muscle invasive urothelial carcinoma (pT2 or above)	High Grade	2013	[Not Available]	-20259	Alive	TUMOR FREE	345	#N/A	[Not Available]	#N/A	#N/A	#N/A	#N/A	Complete Remission/Response	#N/A	#N/A	0	345	0	345	0	345	0	345
167	TCGA-CF-A8HY	BLCA	59	MALE	ASIAN	Stage II	[Not Applicable]	Muscle invasive urothelial carcinoma (pT2 or above)	High Grade	2013	[Not Available]	-21636	Alive	TUMOR FREE	345	#N/A	[Not Available]	#N/A	#N/A	#N/A	#N/A	Complete Remission/Response	#N/A	#N/A	0	345	0	345	0	345	0	345
168	TCGA-CF-A9FF	BLCA	52	MALE	ASIAN	Stage II	[Not Applicable]	Muscle invasive urothelial carcinoma (pT2 or above)	High Grade	2013	[Not Available]	-19195	Alive	TUMOR FREE	361	#N/A	[Not Available]	#N/A	#N/A	#N/A	#N/A	Complete Remission/Response	#N/A	#N/A	0	361	0	361	0	361	0	361
169	TCGA-CF-A9FH	BLCA	85	MALE	ASIAN	Stage II	[Not Applicable]	Muscle invasive urothelial carcinoma (pT2 or above)	Low Grade	2013	[Not Available]	-31236	Alive	TUMOR FREE	-64	#N/A	[Not Available]	#N/A	#N/A	#N/A	#N/A	Complete Remission/Response	#N/A	#N/A	0	0	0	0	0	0	0	0
170	TCGA-CF-A9FL	BLCA	85	MALE	ASIAN	Stage III	[Not Applicable]	Muscle invasive urothelial carcinoma (pT2 or above)	High Grade	2013	[Not Available]	-31099	Dead	WITH TUMOR	#N/A	565	[Not Available]	Locoregional (Urothelial tumor event)	#N/A	#N/A	322	Complete Remission/Response	#N/A	#N/A	1	565	1	565	1	322	1	322
171	TCGA-CF-A9FM	BLCA	50	MALE	ASIAN	Stage I	[Not Applicable]	[Not Available]	High Grade	2013	[Not Available]	-18445	Alive	TUMOR FREE	398	#N/A	[Not Available]	#N/A	#N/A	#N/A	#N/A	Complete Remission/Response	#N/A	#N/A	0	398	0	398	0	398	0	398
172	TCGA-CU-A0YN	BLCA	60	MALE	WHITE	Stage III	[Not Applicable]	Muscle invasive urothelial carcinoma (pT2 or above)	High Grade	2005	[Not Available]	-21927	Dead	#N/A	#N/A	393	[Not Available]	#N/A	#N/A	#N/A	#N/A	[Not Available]	#N/A	#N/A	1	393	#N/A	393	#N/A	#N/A	0	393
173	TCGA-CU-A0YO	BLCA	84	MALE	WHITE	Stage IV	[Not Applicable]	Muscle invasive urothelial carcinoma (pT2 or above)	High Grade	2009	[Not Available]	-30817	Dead	WITH TUMOR	#N/A	149	[Not Available]	Metastatic	Other, specify	peritoneum	118	Complete Remission/Response	#N/A	#N/A	1	149	1	149	#N/A	#N/A	1	118
174	TCGA-CU-A0YR	BLCA	83	MALE	WHITE	Stage IV	[Not Applicable]	Muscle invasive urothelial carcinoma (pT2 or above)	High Grade	2010	[Not Available]	-30674	Dead	WITH TUMOR	#N/A	460	[Not Available]	Metastatic	Lymph Node Only	#N/A	219	Complete Remission/Response	#N/A	#N/A	1	460	1	460	#N/A	#N/A	1	219
175	TCGA-CU-A3KJ	BLCA	75	MALE	WHITE	Stage III	[Not Applicable]	Muscle invasive urothelial carcinoma (pT2 or above)	High Grade	2011	[Not Available]	-27692	Alive	WITH TUMOR	562	#N/A	[Not Available]	Distant Metastasis	Lung	#N/A	166	Progressive Disease	#N/A	#N/A	0	562	0	562	#N/A	#N/A	1	166
176	TCGA-CU-A3QU	BLCA	58	MALE	WHITE	Stage IV	[Not Applicable]	Muscle invasive urothelial carcinoma (pT2 or above)	High Grade	2011	[Not Available]	-21233	Alive	TUMOR FREE	158	#N/A	[Not Available]	#N/A	#N/A	#N/A	#N/A	Complete Remission/Response	#N/A	#N/A	0	158	0	158	#N/A	#N/A	0	158
177	TCGA-CU-A3YL	BLCA	67	MALE	WHITE	Stage III	[Not Applicable]	Muscle invasive urothelial carcinoma (pT2 or above)	High Grade	2011	[Not Available]	-24524	Alive	TUMOR FREE	906	#N/A	[Not Available]	Distant Metastasis	Lung	#N/A	370	Complete Remission/Response	#N/A	#N/A	0	906	0	906	1	370	1	370
178	TCGA-CU-A5W6	BLCA	70	MALE	WHITE	Stage III	[Not Applicable]	Muscle invasive urothelial carcinoma (pT2 or above)	High Grade	2012	[Not Available]	-25706	Dead	TUMOR FREE	#N/A	56	[Not Available]	#N/A	#N/A	#N/A	#N/A	Complete Remission/Response	#N/A	#N/A	1	56	0	56	0	56	0	56
179	TCGA-CU-A72E	BLCA	76	MALE	WHITE	Stage IV	[Not Applicable]	Muscle invasive urothelial carcinoma (pT2 or above)	High Grade	2013	[Not Available]	-27963	Dead	WITH TUMOR	#N/A	413	[Not Available]	New Primary Tumor	Lymph Node Only	#N/A	256	Partial Remission/Response	#N/A	#N/A	1	413	1	413	#N/A	#N/A	1	256
180	TCGA-DK-A1A3	BLCA	60	MALE	WHITE	Stage IV	[Not Applicable]	Muscle invasive urothelial carcinoma (pT2 or above)	High Grade	2010	[Not Available]	-22235	Dead	WITH TUMOR	#N/A	665	[Not Available]	#N/A	#N/A	#N/A	#N/A	[Not Available]	#N/A	#N/A	1	665	1	665	#N/A	#N/A	1	665
181	TCGA-DK-A1A5	BLCA	79	MALE	WHITE	Stage II	[Not Applicable]	Muscle invasive urothelial carcinoma (pT2 or above)	High Grade	2010	[Not Available]	-29111	Dead	TUMOR FREE	#N/A	65	[Not Available]	#N/A	#N/A	#N/A	#N/A	Complete Remission/Response	#N/A	#N/A	1	65	0	65	0	65	0	65
182	TCGA-DK-A1A6	BLCA	53	MALE	WHITE	Stage IV	[Not Applicable]	Muscle invasive urothelial carcinoma (pT2 or above)	High Grade	2008	[Not Available]	-19554	Alive	TUMOR FREE	2020	#N/A	[Not Available]	#N/A	#N/A	#N/A	#N/A	Complete Remission/Response	#N/A	#N/A	0	2020	0	2020	#N/A	#N/A	0	2020
183	TCGA-DK-A1A7	BLCA	67	FEMALE	WHITE	Stage IV	[Not Applicable]	Muscle invasive urothelial carcinoma (pT2 or above)	High Grade	2010	[Not Available]	-24499	Alive	WITH TUMOR	560	#N/A	[Not Available]	Metastatic	Lung	#N/A	112	[Not Available]	#N/A	#N/A	0	560	0	560	#N/A	#N/A	1	112
184	TCGA-DK-A1AA	BLCA	57	MALE	WHITE	Stage III	[Not Applicable]	Muscle invasive urothelial carcinoma (pT2 or above)	High Grade	2010	[Not Available]	-21093	Alive	TUMOR FREE	578	#N/A	[Not Available]	#N/A	#N/A	#N/A	#N/A	Complete Remission/Response	#N/A	#N/A	0	578	0	578	0	578	0	578
185	TCGA-DK-A1AB	BLCA	74	FEMALE	WHITE	Stage IV	[Not Applicable]	Muscle invasive urothelial carcinoma (pT2 or above)	High Grade	2010	[Not Available]	-27126	Dead	#N/A	#N/A	508	[Not Available]	Metastatic	Lung	#N/A	364	Progressive Disease	#N/A	#N/A	1	508	#N/A	508	#N/A	#N/A	1	364
186	TCGA-DK-A1AC	BLCA	72	MALE	WHITE	Stage III	[Not Applicable]	Muscle invasive urothelial carcinoma (pT2 or above)	High Grade	2000	[Not Available]	-26307	Alive	TUMOR FREE	3981	#N/A	[Not Available]	#N/A	#N/A	#N/A	#N/A	Complete Remission/Response	#N/A	#N/A	0	3981	0	3981	0	3981	0	3981
187	TCGA-DK-A1AD	BLCA	69	MALE	WHITE	Stage IV	[Not Applicable]	Muscle invasive urothelial carcinoma (pT2 or above)	High Grade	2002	[Not Available]	-25317	Alive	TUMOR FREE	3420	#N/A	[Not Available]	#N/A	#N/A	#N/A	#N/A	[Not Available]	#N/A	#N/A	0	3420	0	3420	#N/A	#N/A	0	3420
188	TCGA-DK-A1AE	BLCA	84	MALE	WHITE	Stage III	[Not Applicable]	Muscle invasive urothelial carcinoma (pT2 or above)	High Grade	2010	[Not Available]	-30707	Alive	WITH TUMOR	491	#N/A	[Not Available]	Metastatic	Bone	#N/A	211	Progressive Disease	#N/A	#N/A	0	491	0	491	#N/A	#N/A	1	211
189	TCGA-DK-A1AF	BLCA	84	FEMALE	WHITE	Stage IV	[Not Applicable]	Muscle invasive urothelial carcinoma (pT2 or above)	High Grade	2010	[Not Available]	-30914	Alive	TUMOR FREE	536	#N/A	[Not Available]	Metastatic	Lymph Node Only	#N/A	283	Progressive Disease	#N/A	#N/A	0	536	0	536	#N/A	#N/A	1	283
190	TCGA-DK-A1AG	BLCA	65	MALE	WHITE	Stage III	[Not Applicable]	Muscle invasive urothelial carcinoma (pT2 or above)	High Grade	2010	[Not Available]	-24095	Alive	TUMOR FREE	475	#N/A	[Not Available]	#N/A	#N/A	#N/A	#N/A	Complete Remission/Response	#N/A	#N/A	0	475	0	475	0	475	0	475
191	TCGA-DK-A2HX	BLCA	80	FEMALE	WHITE	Stage IV	[Not Applicable]	Muscle invasive urothelial carcinoma (pT2 or above)	High Grade	2010	[Not Available]	-29332	Dead	TUMOR FREE	#N/A	1420	[Not Available]	#N/A	#N/A	#N/A	#N/A	[Not Available]	#N/A	#N/A	1	1420	0	1420	#N/A	#N/A	0	1420
192	TCGA-DK-A2I1	BLCA	73	FEMALE	WHITE	Stage II	[Not Applicable]	Muscle invasive urothelial carcinoma (pT2 or above)	High Grade	2010	[Not Available]	-26726	Alive	TUMOR FREE	546	#N/A	[Not Available]	#N/A	#N/A	#N/A	#N/A	Complete Remission/Response	#N/A	#N/A	0	546	0	546	0	546	0	546
193	TCGA-DK-A2I2	BLCA	63	FEMALE	WHITE	Stage IV	[Not Applicable]	Muscle invasive urothelial carcinoma (pT2 or above)	High Grade	2010	[Not Available]	-23116	Dead	WITH TUMOR	#N/A	237	[Not Available]	Distant Metastasis	Liver	#N/A	163	Complete Remission/Response	#N/A	#N/A	1	237	1	237	#N/A	#N/A	1	163
194	TCGA-DK-A2I4	BLCA	79	MALE	WHITE	Stage III	[Not Applicable]	Muscle invasive urothelial carcinoma (pT2 or above)	High Grade	2001	[Not Available]	-29037	Alive	TUMOR FREE	4343	#N/A	[Not Available]	#N/A	#N/A	#N/A	#N/A	Complete Remission/Response	#N/A	#N/A	0	4343	0	4343	0	4343	0	4343
195	TCGA-DK-A2I6	BLCA	81	MALE	WHITE	Stage IV	[Not Applicable]	Muscle invasive urothelial carcinoma (pT2 or above)	High Grade	2005	[Not Available]	-29789	Alive	TUMOR FREE	2656	#N/A	[Not Available]	#N/A	#N/A	#N/A	#N/A	Complete Remission/Response	#N/A	#N/A	0	2656	0	2656	#N/A	#N/A	0	2656
196	TCGA-DK-A3IK	BLCA	87	MALE	WHITE	Stage IV	[Not Applicable]	Muscle invasive urothelial carcinoma (pT2 or above)	High Grade	2011	[Not Available]	-32076	Dead	TUMOR FREE	#N/A	146	[Not Available]	#N/A	#N/A	#N/A	#N/A	Complete Remission/Response	#N/A	#N/A	1	146	0	146	#N/A	#N/A	0	146
197	TCGA-DK-A3IL	BLCA	79	FEMALE	WHITE	Stage IV	[Not Applicable]	Muscle invasive urothelial carcinoma (pT2 or above)	High Grade	2011	[Not Available]	-29047	Dead	TUMOR FREE	#N/A	413	[Not Available]	#N/A	#N/A	#N/A	#N/A	Complete Remission/Response	#N/A	#N/A	1	413	0	413	#N/A	#N/A	0	413
198	TCGA-DK-A3IM	BLCA	76	MALE	WHITE	Stage III	[Not Applicable]	Muscle invasive urothelial carcinoma (pT2 or above)	High Grade	2011	[Not Available]	-28106	Dead	WITH TUMOR	#N/A	248	[Not Available]	Locoregional (Urothelial tumor event)	Lymph Node Only	#N/A	201	Complete Remission/Response	#N/A	#N/A	1	248	1	248	1	201	1	201
199	TCGA-DK-A3IN	BLCA	72	MALE	WHITE	Stage III	[Not Applicable]	Muscle invasive urothelial carcinoma (pT2 or above)	High Grade	2011	[Not Available]	-26562	Dead	TUMOR FREE	#N/A	250	[Not Available]	#N/A	#N/A	#N/A	#N/A	Complete Remission/Response	#N/A	#N/A	1	250	0	250	0	250	0	250
200	TCGA-DK-A3IQ	BLCA	74	MALE	WHITE	Stage III	[Not Applicable]	Muscle invasive urothelial carcinoma (pT2 or above)	High Grade	2011	[Not Available]	-27194	Dead	WITH TUMOR	#N/A	539	[Not Available]	Locoregional (Urothelial tumor event)	Lymph Node Only	#N/A	250	Complete Remission/Response	#N/A	#N/A	1	539	1	539	1	250	1	250
201	TCGA-DK-A3IS	BLCA	68	MALE	WHITE	Stage II	[Not Applicable]	Muscle invasive urothelial carcinoma (pT2 or above)	High Grade	2008	[Not Available]	-25098	Alive	TUMOR FREE	1529	#N/A	[Not Available]	#N/A	#N/A	#N/A	#N/A	Complete Remission/Response	#N/A	#N/A	0	1529	0	1529	0	1529	0	1529
202	TCGA-DK-A3IT	BLCA	62	MALE	WHITE	Stage III	[Not Applicable]	Muscle invasive urothelial carcinoma (pT2 or above)	High Grade	2011	[Not Available]	-22786	Alive	TUMOR FREE	648	#N/A	[Not Available]	#N/A	#N/A	#N/A	#N/A	Complete Remission/Response	#N/A	#N/A	0	648	0	648	0	648	0	648
203	TCGA-DK-A3IU	BLCA	58	MALE	WHITE	Stage II	[Not Applicable]	Muscle invasive urothelial carcinoma (pT2 or above)	High Grade	2011	[Not Available]	-21369	Dead	WITH TUMOR	#N/A	706	[Not Available]	Distant Metastasis	Lung	#N/A	462	Complete Remission/Response	#N/A	#N/A	1	706	1	706	1	462	1	462
204	TCGA-DK-A3IV	BLCA	60	MALE	WHITE	Stage II	[Not Applicable]	Muscle invasive urothelial carcinoma (pT2 or above)	High Grade	2011	[Not Available]	-22237	Dead	WITH TUMOR	#N/A	294	[Not Available]	Locoregional (Urothelial tumor event)	Lymph Node Only	#N/A	212	Stable Disease	#N/A	#N/A	1	294	1	294	#N/A	#N/A	1	212
205	TCGA-DK-A3WW	BLCA	57	MALE	WHITE	Stage III	[Not Applicable]	Muscle invasive urothelial carcinoma (pT2 or above)	High Grade	2011	[Not Available]	-20909	Alive	TUMOR FREE	633	#N/A	[Not Available]	#N/A	#N/A	#N/A	#N/A	Complete Remission/Response	#N/A	#N/A	0	633	0	633	0	633	0	633
206	TCGA-DK-A3WX	BLCA	67	FEMALE	WHITE	Stage III	[Not Applicable]	Muscle invasive urothelial carcinoma (pT2 or above)	High Grade	2011	[Not Available]	-24553	Dead	WITH TUMOR	#N/A	321	[Not Available]	Locoregional (Urothelial tumor event)	Bladder	#N/A	167	Progressive Disease	#N/A	#N/A	1	321	1	321	#N/A	#N/A	1	167
207	TCGA-DK-A3WY	BLCA	67	FEMALE	WHITE	Stage III	[Not Applicable]	Muscle invasive urothelial carcinoma (pT2 or above)	High Grade	2001	[Not Available]	-24536	Alive	TUMOR FREE	4967	#N/A	[Not Available]	#N/A	#N/A	#N/A	#N/A	Complete Remission/Response	#N/A	#N/A	0	4967	0	4967	0	4967	0	4967
208	TCGA-DK-A3X1	BLCA	78	FEMALE	WHITE	Stage III	[Not Applicable]	Muscle invasive urothelial carcinoma (pT2 or above)	High Grade	2009	[Not Available]	-28757	Alive	TUMOR FREE	2009	#N/A	[Not Available]	#N/A	#N/A	#N/A	#N/A	Complete Remission/Response	#N/A	#N/A	0	2009	0	2009	0	2009	0	2009
209	TCGA-DK-A3X2	BLCA	85	MALE	WHITE	Stage IV	[Not Applicable]	Muscle invasive urothelial carcinoma (pT2 or above)	High Grade	2010	[Not Available]	-31160	Dead	WITH TUMOR	#N/A	547	[Not Available]	Distant Metastasis	Liver	#N/A	533	Complete Remission/Response	#N/A	#N/A	1	547	1	547	#N/A	#N/A	1	533
210	TCGA-DK-A6AV	BLCA	82	FEMALE	ASIAN	Stage II	[Not Applicable]	Muscle invasive urothelial carcinoma (pT2 or above)	High Grade	2008	[Not Available]	-30089	Alive	TUMOR FREE	1952	#N/A	[Not Available]	#N/A	#N/A	#N/A	#N/A	Complete Remission/Response	#N/A	#N/A	0	1952	0	1952	0	1952	0	1952
211	TCGA-DK-A6AW	BLCA	70	MALE	WHITE	Stage II	[Not Applicable]	Muscle invasive urothelial carcinoma (pT2 or above)	High Grade	2010	[Not Available]	-25644	Alive	TUMOR FREE	1621	#N/A	[Not Available]	#N/A	#N/A	#N/A	#N/A	Complete Remission/Response	#N/A	#N/A	0	1621	0	1621	0	1621	0	1621
212	TCGA-DK-A6B0	BLCA	61	MALE	WHITE	Stage II	[Not Applicable]	Muscle invasive urothelial carcinoma (pT2 or above)	High Grade	2007	[Not Available]	-22439	Alive	TUMOR FREE	2330	#N/A	[Not Available]	#N/A	#N/A	#N/A	#N/A	Complete Remission/Response	#N/A	#N/A	0	2330	0	2330	0	2330	0	2330
213	TCGA-DK-A6B1	BLCA	67	MALE	WHITE	Stage II	[Not Applicable]	Muscle invasive urothelial carcinoma (pT2 or above)	High Grade	2007	[Not Available]	-24607	Alive	TUMOR FREE	2049	#N/A	[Not Available]	#N/A	#N/A	#N/A	#N/A	Complete Remission/Response	#N/A	#N/A	0	2049	0	2049	0	2049	0	2049
214	TCGA-DK-A6B2	BLCA	70	MALE	WHITE	Stage IV	[Not Applicable]	Muscle invasive urothelial carcinoma (pT2 or above)	High Grade	2012	[Not Available]	-25625	Alive	WITH TUMOR	477	#N/A	[Not Available]	Distant Metastasis	Liver	#N/A	268	Complete Remission/Response	#N/A	#N/A	0	477	0	477	#N/A	#N/A	1	268
215	TCGA-DK-A6B5	BLCA	45	MALE	WHITE	Stage IV	[Not Applicable]	Muscle invasive urothelial carcinoma (pT2 or above)	High Grade	2010	[Not Available]	-16453	Alive	TUMOR FREE	1542	#N/A	[Not Available]	#N/A	#N/A	#N/A	#N/A	Complete Remission/Response	#N/A	#N/A	0	1542	0	1542	#N/A	#N/A	0	1542
216	TCGA-DK-A6B6	BLCA	57	MALE	WHITE	Stage II	[Not Applicable]	Muscle invasive urothelial carcinoma (pT2 or above)	High Grade	2011	[Not Available]	-21007	Alive	TUMOR FREE	1115	#N/A	[Not Available]	#N/A	#N/A	#N/A	#N/A	Complete Remission/Response	#N/A	#N/A	0	1115	0	1115	0	1115	0	1115
217	TCGA-DK-AA6L	BLCA	48	MALE	WHITE	Stage IV	[Not Applicable]	Muscle invasive urothelial carcinoma (pT2 or above)	High Grade	2010	[Not Available]	-17635	Dead	WITH TUMOR	#N/A	1163	[Not Available]	Distant Metastasis	Bone	#N/A	920	Progressive Disease	#N/A	#N/A	1	1163	1	1163	#N/A	#N/A	1	920
218	TCGA-DK-AA6M	BLCA	64	FEMALE	WHITE	Stage II	[Not Applicable]	Muscle invasive urothelial carcinoma (pT2 or above)	High Grade	2010	[Not Available]	-23574	Alive	TUMOR FREE	1582	#N/A	[Not Available]	#N/A	#N/A	#N/A	#N/A	Partial Remission/Response	#N/A	#N/A	0	1582	0	1582	#N/A	#N/A	0	1582
219	TCGA-DK-AA6P	BLCA	72	FEMALE	WHITE	Stage II	[Not Applicable]	Muscle invasive urothelial carcinoma (pT2 or above)	High Grade	2013	[Not Available]	-26560	Alive	TUMOR FREE	457	#N/A	[Not Available]	Distant Metastasis	Bone	#N/A	16	Partial Remission/Response	#N/A	#N/A	0	457	0	457	#N/A	#N/A	1	16
220	TCGA-DK-AA6Q	BLCA	61	FEMALE	WHITE	Stage IV	[Not Applicable]	Muscle invasive urothelial carcinoma (pT2 or above)	High Grade	2012	[Not Available]	-22314	Dead	WITH TUMOR	#N/A	413	[Not Available]	Distant Metastasis	Liver	#N/A	285	Progressive Disease	#N/A	#N/A	1	413	1	413	#N/A	#N/A	1	285
221	TCGA-DK-AA6R	BLCA	68	MALE	WHITE	Stage IV	[Not Applicable]	Muscle invasive urothelial carcinoma (pT2 or above)	High Grade	2001	[Not Available]	-25196	Alive	WITH TUMOR	5041	#N/A	[Not Available]	New Primary Tumor	Other, specify	Colon	4907	Stable Disease	#N/A	#N/A	0	5041	0	5041	#N/A	#N/A	1	4907
222	TCGA-DK-AA6S	BLCA	60	MALE	WHITE	Stage III	[Not Applicable]	Muscle invasive urothelial carcinoma (pT2 or above)	High Grade	2000	[Not Available]	-22027	Alive	TUMOR FREE	5050	#N/A	[Not Available]	Distant Metastasis	Other, specify	soft tissue pelvic mass	539	Complete Remission/Response	#N/A	#N/A	0	5050	0	5050	1	539	1	539
223	TCGA-DK-AA6T	BLCA	63	MALE	WHITE	Stage II	[Not Applicable]	Muscle invasive urothelial carcinoma (pT2 or above)	High Grade	2013	[Not Available]	-23198	Alive	TUMOR FREE	572	#N/A	[Not Available]	#N/A	#N/A	#N/A	#N/A	Complete Remission/Response	#N/A	#N/A	0	572	0	572	0	572	0	572
224	TCGA-DK-AA6U	BLCA	64	MALE	WHITE	Stage II	[Not Applicable]	Muscle invasive urothelial carcinoma (pT2 or above)	[Unknown]	2013	[Not Available]	-23611	Alive	TUMOR FREE	578	#N/A	[Not Available]	#N/A	#N/A	#N/A	#N/A	Complete Remission/Response	#N/A	#N/A	0	578	0	578	0	578	0	578
225	TCGA-DK-AA6W	BLCA	78	MALE	WHITE	Stage II	[Not Applicable]	Muscle invasive urothelial carcinoma (pT2 or above)	High Grade	2013	[Not Available]	-28853	Dead	WITH TUMOR	#N/A	415	[Not Available]	Distant Metastasis	Lung	#N/A	379	Stable Disease	#N/A	#N/A	1	415	1	415	#N/A	#N/A	1	379
226	TCGA-DK-AA6X	BLCA	63	MALE	WHITE	Stage II	[Not Applicable]	Muscle invasive urothelial carcinoma (pT2 or above)	High Grade	2013	[Not Available]	-23208	Alive	TUMOR FREE	467	#N/A	[Not Available]	#N/A	#N/A	#N/A	#N/A	Progressive Disease	#N/A	#N/A	0	467	0	467	#N/A	#N/A	0	467
227	TCGA-DK-AA71	BLCA	71	MALE	WHITE	Stage II	[Not Applicable]	Muscle invasive urothelial carcinoma (pT2 or above)	High Grade	2013	[Not Available]	-25950	Alive	WITH TUMOR	415	#N/A	[Not Available]	#N/A	#N/A	#N/A	#N/A	Stable Disease	#N/A	#N/A	0	415	0	415	#N/A	#N/A	0	415
228	TCGA-DK-AA74	BLCA	75	MALE	WHITE	Stage III	[Not Applicable]	Muscle invasive urothelial carcinoma (pT2 or above)	High Grade	2010	[Not Available]	-27730	Alive	TUMOR FREE	1708	#N/A	[Not Available]	#N/A	#N/A	#N/A	#N/A	Complete Remission/Response	#N/A	#N/A	0	1708	0	1708	0	1708	0	1708
229	TCGA-DK-AA75	BLCA	82	MALE	WHITE	Stage III	[Not Applicable]	Muscle invasive urothelial carcinoma (pT2 or above)	High Grade	2013	[Not Available]	-30090	Dead	WITH TUMOR	#N/A	340	[Not Available]	Distant Metastasis	Bone	#N/A	328	Stable Disease	#N/A	#N/A	1	340	1	340	#N/A	#N/A	1	328
230	TCGA-DK-AA76	BLCA	64	FEMALE	WHITE	Stage II	[Not Applicable]	Muscle invasive urothelial carcinoma (pT2 or above)	High Grade	2013	[Not Available]	-23542	Alive	WITH TUMOR	366	#N/A	[Not Available]	#N/A	#N/A	#N/A	#N/A	Complete Remission/Response	#N/A	#N/A	0	366	0	366	0	366	0	366
231	TCGA-DK-AA77	BLCA	61	MALE	WHITE	Stage II	[Not Applicable]	Muscle invasive urothelial carcinoma (pT2 or above)	High Grade	2013	[Not Available]	-22365	Alive	TUMOR FREE	618	#N/A	[Not Available]	Distant Metastasis	Other, specify	Pelvis	467	Stable Disease	#N/A	#N/A	0	618	0	618	#N/A	#N/A	1	467
232	TCGA-E5-A2PC	BLCA	61	FEMALE	WHITE	Stage IV	[Not Applicable]	Muscle invasive urothelial carcinoma (pT2 or above)	High Grade	2008	[Not Available]	-22308	Alive	TUMOR FREE	1326	#N/A	[Not Available]	#N/A	#N/A	#N/A	#N/A	Complete Remission/Response	#N/A	#N/A	0	1326	0	1326	#N/A	#N/A	0	1326
233	TCGA-E5-A4TZ	BLCA	64	MALE	WHITE	Stage IV	[Not Applicable]	Muscle invasive urothelial carcinoma (pT2 or above)	High Grade	2010	[Not Available]	-23566	Dead	WITH TUMOR	#N/A	467	[Not Available]	Locoregional (Urothelial tumor event)	Other, specify	soft tissue pelvic mass	435	Progressive Disease	#N/A	#N/A	1	467	1	467	#N/A	#N/A	1	435
234	TCGA-E5-A4U1	BLCA	72	MALE	[Unknown]	Stage II	[Not Applicable]	Muscle invasive urothelial carcinoma (pT2 or above)	High Grade	2011	[Not Available]	-26305	Alive	WITH TUMOR	1181	#N/A	[Not Available]	Distant Metastasis	Bone	#N/A	705	Complete Remission/Response	#N/A	#N/A	0	1181	0	1181	1	705	1	705
235	TCGA-E7-A3X6	BLCA	70	MALE	WHITE	Stage II	[Not Applicable]	Muscle invasive urothelial carcinoma (pT2 or above)	Low Grade	2011	[Not Available]	-25584	Dead	WITH TUMOR	#N/A	904	[Not Available]	Distant Metastasis	Bone	#N/A	369	Complete Remission/Response	#N/A	#N/A	1	904	1	904	1	369	1	369
236	TCGA-E7-A3Y1	BLCA	57	MALE	WHITE	Stage II	[Not Applicable]	Muscle invasive urothelial carcinoma (pT2 or above)	Low Grade	2012	[Not Available]	-20917	Alive	TUMOR FREE	163	#N/A	[Not Available]	#N/A	#N/A	#N/A	#N/A	Complete Remission/Response	#N/A	#N/A	0	163	0	163	0	163	0	163
237	TCGA-E7-A4IJ	BLCA	56	MALE	ASIAN	Stage II	[Not Applicable]	Muscle invasive urothelial carcinoma (pT2 or above)	High Grade	2012	[Not Available]	-20723	Dead	WITH TUMOR	#N/A	674	[Not Available]	Distant Metastasis	Bone	#N/A	620	Complete Remission/Response	#N/A	#N/A	1	674	1	674	1	620	1	620
238	TCGA-E7-A4XJ	BLCA	66	MALE	ASIAN	Stage II	[Not Applicable]	Muscle invasive urothelial carcinoma (pT2 or above)	High Grade	2012	[Not Available]	-24279	Dead	TUMOR FREE	#N/A	68	[Not Available]	#N/A	#N/A	#N/A	#N/A	Complete Remission/Response	#N/A	#N/A	1	68	0	68	0	68	0	68
239	TCGA-E7-A519	BLCA	72	MALE	WHITE	Stage II	[Not Applicable]	Muscle invasive urothelial carcinoma (pT2 or above)	High Grade	2012	[Not Available]	-26427	Alive	TUMOR FREE	508	#N/A	[Not Available]	#N/A	#N/A	#N/A	#N/A	Complete Remission/Response	#N/A	#N/A	0	508	0	508	0	508	0	508
240	TCGA-E7-A541	BLCA	66	MALE	WHITE	Stage II	[Not Applicable]	Muscle invasive urothelial carcinoma (pT2 or above)	High Grade	2012	[Not Available]	-24206	Dead	TUMOR FREE	#N/A	778	[Not Available]	#N/A	#N/A	#N/A	#N/A	Complete Remission/Response	#N/A	#N/A	1	778	0	778	0	778	0	778
241	TCGA-E7-A5KE	BLCA	78	FEMALE	ASIAN	Stage II	[Not Applicable]	Muscle invasive urothelial carcinoma (pT2 or above)	High Grade	2012	[Not Available]	-28714	Alive	TUMOR FREE	17	#N/A	[Not Available]	#N/A	#N/A	#N/A	#N/A	[Not Available]	#N/A	#N/A	0	17	0	17	#N/A	#N/A	0	17
242	TCGA-E7-A5KF	BLCA	67	MALE	ASIAN	Stage II	[Not Applicable]	Muscle invasive urothelial carcinoma (pT2 or above)	Low Grade	2012	[Not Available]	-24528	Alive	TUMOR FREE	20	#N/A	[Not Available]	#N/A	#N/A	#N/A	#N/A	[Not Available]	#N/A	#N/A	0	20	0	20	#N/A	#N/A	0	20
243	TCGA-E7-A677	BLCA	81	MALE	ASIAN	Stage II	[Not Applicable]	Muscle invasive urothelial carcinoma (pT2 or above)	Low Grade	2012	[Not Available]	-29613	Alive	TUMOR FREE	820	#N/A	[Not Available]	#N/A	#N/A	#N/A	#N/A	Complete Remission/Response	#N/A	#N/A	0	820	0	820	0	820	0	820
244	TCGA-E7-A678	BLCA	55	MALE	ASIAN	Stage III	[Not Applicable]	Muscle invasive urothelial carcinoma (pT2 or above)	Low Grade	2012	[Not Available]	-20169	Alive	TUMOR FREE	798	#N/A	[Not Available]	#N/A	#N/A	#N/A	#N/A	Complete Remission/Response	#N/A	#N/A	0	798	0	798	0	798	0	798
245	TCGA-E7-A6MD	BLCA	66	MALE	WHITE	Stage IV	[Not Applicable]	Muscle invasive urothelial carcinoma (pT2 or above)	High Grade	2012	[Not Available]	-24180	Alive	#N/A	129	#N/A	[Not Available]	#N/A	#N/A	#N/A	#N/A	[Unknown]	#N/A	#N/A	0	129	0	129	#N/A	#N/A	0	129
246	TCGA-E7-A6ME	BLCA	75	MALE	ASIAN	Stage II	[Not Applicable]	Muscle invasive urothelial carcinoma (pT2 or above)	High Grade	2013	[Not Available]	-27670	Alive	TUMOR FREE	731	#N/A	[Not Available]	#N/A	#N/A	#N/A	#N/A	Complete Remission/Response	#N/A	#N/A	0	731	0	731	0	731	0	731
247	TCGA-E7-A6MF	BLCA	37	MALE	ASIAN	Stage II	[Not Applicable]	Muscle invasive urothelial carcinoma (pT2 or above)	Low Grade	2013	[Not Available]	-13867	Alive	TUMOR FREE	750	#N/A	[Not Available]	#N/A	#N/A	#N/A	#N/A	Complete Remission/Response	#N/A	#N/A	0	750	0	750	0	750	0	750
248	TCGA-E7-A7DU	BLCA	73	MALE	WHITE	Stage III	[Not Applicable]	Muscle invasive urothelial carcinoma (pT2 or above)	Low Grade	2013	[Not Available]	-27000	Alive	TUMOR FREE	28	#N/A	[Not Available]	#N/A	#N/A	#N/A	#N/A	Complete Remission/Response	#N/A	#N/A	0	28	0	28	0	28	0	28
249	TCGA-E7-A7DV	BLCA	44	MALE	WHITE	Stage IV	[Not Applicable]	Muscle invasive urothelial carcinoma (pT2 or above)	High Grade	2013	[Not Available]	-16145	Alive	WITH TUMOR	37	#N/A	[Not Available]	#N/A	#N/A	#N/A	#N/A	Stable Disease	#N/A	#N/A	0	37	0	37	#N/A	#N/A	0	37
250	TCGA-E7-A7PW	BLCA	63	MALE	ASIAN	Stage III	[Not Applicable]	Muscle invasive urothelial carcinoma (pT2 or above)	High Grade	2013	[Not Available]	-23057	Alive	TUMOR FREE	416	#N/A	[Not Available]	Distant Metastasis	Bone	#N/A	174	Complete Remission/Response	#N/A	#N/A	0	416	0	416	1	174	1	174
251	TCGA-E7-A7XN	BLCA	66	MALE	ASIAN	Stage III	[Not Applicable]	Muscle invasive urothelial carcinoma (pT2 or above)	High Grade	2013	[Not Available]	-24466	Alive	WITH TUMOR	428	#N/A	[Not Available]	Locoregional (Urothelial tumor event)	Bladder	#N/A	190	Progressive Disease	#N/A	#N/A	0	428	0	428	#N/A	#N/A	1	190
252	TCGA-E7-A85H	BLCA	64	MALE	ASIAN	Stage III	[Not Applicable]	Muscle invasive urothelial carcinoma (pT2 or above)	High Grade	2013	[Not Available]	-23497	Alive	TUMOR FREE	394	#N/A	[Not Available]	#N/A	#N/A	#N/A	#N/A	Complete Remission/Response	#N/A	#N/A	0	394	0	394	0	394	0	394
253	TCGA-E7-A8O7	BLCA	52	MALE	ASIAN	Stage II	[Not Applicable]	Muscle invasive urothelial carcinoma (pT2 or above)	Low Grade	2013	[Not Available]	-19063	Alive	TUMOR FREE	466	#N/A	[Not Available]	#N/A	#N/A	#N/A	#N/A	Complete Remission/Response	#N/A	#N/A	0	466	0	466	0	466	0	466
254	TCGA-E7-A8O8	BLCA	59	MALE	ASIAN	Stage II	[Not Applicable]	Muscle invasive urothelial carcinoma (pT2 or above)	High Grade	2013	[Not Available]	-21629	Alive	TUMOR FREE	13	#N/A	[Not Available]	#N/A	#N/A	#N/A	#N/A	Complete Remission/Response	#N/A	#N/A	0	13	0	13	0	13	0	13
255	TCGA-E7-A97P	BLCA	73	MALE	ASIAN	Stage II	[Not Applicable]	Muscle invasive urothelial carcinoma (pT2 or above)	High Grade	2013	[Not Available]	-26956	Dead	TUMOR FREE	#N/A	437	[Not Available]	#N/A	#N/A	#N/A	#N/A	Complete Remission/Response	#N/A	#N/A	1	437	0	437	0	437	0	437
256	TCGA-E7-A97Q	BLCA	60	FEMALE	WHITE	Stage IV	[Not Applicable]	Muscle invasive urothelial carcinoma (pT2 or above)	High Grade	2013	[Not Available]	-22249	Dead	WITH TUMOR	#N/A	246	[Not Available]	#N/A	#N/A	#N/A	#N/A	Stable Disease	#N/A	#N/A	1	246	1	246	#N/A	#N/A	1	246
257	TCGA-FD-A3B3	BLCA	74	FEMALE	WHITE	Stage III	[Not Applicable]	Muscle invasive urothelial carcinoma (pT2 or above)	High Grade	2011	[Not Available]	-27068	Dead	TUMOR FREE	#N/A	974	[Not Available]	#N/A	#N/A	#N/A	#N/A	Complete Remission/Response	#N/A	#N/A	1	974	0	974	0	974	0	974
258	TCGA-FD-A3B4	BLCA	55	FEMALE	BLACK OR AFRICAN AMERICAN	Stage III	[Not Applicable]	Muscle invasive urothelial carcinoma (pT2 or above)	High Grade	2011	[Not Available]	-20379	Dead	WITH TUMOR	#N/A	510	[Not Available]	Locoregional (Urothelial tumor event)	Other, specify	Left posterior pelvic wall	359	Complete Remission/Response	#N/A	#N/A	1	510	1	510	1	359	1	359
259	TCGA-FD-A3B5	BLCA	86	MALE	BLACK OR AFRICAN AMERICAN	Stage IV	[Not Applicable]	Muscle invasive urothelial carcinoma (pT2 or above)	High Grade	2011	[Not Available]	-31442	Dead	WITH TUMOR	#N/A	272	[Not Available]	#N/A	#N/A	#N/A	#N/A	Progressive Disease	#N/A	#N/A	1	272	1	272	#N/A	#N/A	1	272
260	TCGA-FD-A3B6	BLCA	75	MALE	WHITE	Stage II	[Not Applicable]	Muscle invasive urothelial carcinoma (pT2 or above)	High Grade	2011	[Not Available]	-27541	Dead	TUMOR FREE	#N/A	1005	[Not Available]	#N/A	#N/A	#N/A	#N/A	Complete Remission/Response	#N/A	#N/A	1	1005	0	1005	0	1005	0	1005
261	TCGA-FD-A3B7	BLCA	66	MALE	BLACK OR AFRICAN AMERICAN	Stage III	[Not Applicable]	Muscle invasive urothelial carcinoma (pT2 or above)	High Grade	2011	[Not Available]	-24245	Dead	WITH TUMOR	#N/A	122	[Not Available]	Distant Metastasis	Lymph Node Only	#N/A	110	Progressive Disease	#N/A	#N/A	1	122	1	122	#N/A	#N/A	1	110
262	TCGA-FD-A3B8	BLCA	56	MALE	WHITE	Stage II	[Not Applicable]	Muscle invasive urothelial carcinoma (pT2 or above)	High Grade	2011	[Not Available]	-20555	Alive	TUMOR FREE	384	#N/A	[Not Available]	#N/A	#N/A	#N/A	#N/A	Complete Remission/Response	#N/A	#N/A	0	384	0	384	0	384	0	384
263	TCGA-FD-A3N5	BLCA	69	MALE	BLACK OR AFRICAN AMERICAN	Stage II	[Not Applicable]	Muscle invasive urothelial carcinoma (pT2 or above)	High Grade	2011	[Not Available]	-25342	Dead	WITH TUMOR	#N/A	685	[Not Available]	Locoregional (Urothelial tumor event)	Other, specify	Pelvis	346	[Not Available]	#N/A	#N/A	1	685	1	685	#N/A	#N/A	1	346
264	TCGA-FD-A3N6	BLCA	43	FEMALE	BLACK OR AFRICAN AMERICAN	Stage II	[Not Applicable]	Muscle invasive urothelial carcinoma (pT2 or above)	High Grade	2011	[Not Available]	-15758	Alive	TUMOR FREE	851	#N/A	[Not Available]	#N/A	#N/A	#N/A	#N/A	Complete Remission/Response	#N/A	#N/A	0	851	0	851	0	851	0	851
265	TCGA-FD-A3NA	BLCA	60	MALE	WHITE	Stage II	[Not Applicable]	Muscle invasive urothelial carcinoma (pT2 or above)	High Grade	2009	[Not Available]	-21936	Alive	TUMOR FREE	1845	#N/A	[Not Available]	New Primary Tumor	Lung	#N/A	1338	Complete Remission/Response	#N/A	#N/A	0	1845	0	1845	0	1845	1	1338
266	TCGA-FD-A3SJ	BLCA	59	MALE	WHITE	Stage IV	[Not Applicable]	Muscle invasive urothelial carcinoma (pT2 or above)	High Grade	2010	[Not Available]	-21615	Dead	WITH TUMOR	#N/A	739	[Not Available]	Distant Metastasis	Lymph Node Only	#N/A	281	[Not Applicable]	#N/A	#N/A	1	739	1	739	#N/A	#N/A	1	281
267	TCGA-FD-A3SL	BLCA	60	MALE	WHITE	Stage IV	[Not Applicable]	Muscle invasive urothelial carcinoma (pT2 or above)	High Grade	2011	[Not Available]	-22020	Dead	WITH TUMOR	#N/A	712	[Not Available]	Distant Metastasis	Lung	#N/A	260	Progressive Disease	#N/A	#N/A	1	712	1	712	#N/A	#N/A	1	260
268	TCGA-FD-A3SM	BLCA	70	MALE	WHITE	Stage IV	[Not Applicable]	Muscle invasive urothelial carcinoma (pT2 or above)	High Grade	2011	[Not Available]	-25852	Dead	WITH TUMOR	#N/A	547	[Not Available]	Distant Metastasis	Lymph Node Only	#N/A	144	[Unknown]	#N/A	#N/A	1	547	1	547	#N/A	#N/A	1	144
269	TCGA-FD-A3SN	BLCA	79	MALE	WHITE	Stage III	[Not Applicable]	Muscle invasive urothelial carcinoma (pT2 or above)	High Grade	2011	[Not Available]	-29169	Alive	TUMOR FREE	887	#N/A	[Not Available]	Distant Metastasis	Lung	#N/A	110	Progressive Disease	#N/A	#N/A	0	887	0	887	#N/A	#N/A	1	110
270	TCGA-FD-A3SO	BLCA	68	MALE	WHITE	Stage IV	[Not Applicable]	Muscle invasive urothelial carcinoma (pT2 or above)	High Grade	2012	[Not Available]	-25147	Dead	WITH TUMOR	#N/A	168	[Not Available]	Locoregional (Urothelial tumor event)	Renal Pelvis	#N/A	143	Progressive Disease	#N/A	#N/A	1	168	1	168	#N/A	#N/A	1	143
271	TCGA-FD-A3SP	BLCA	60	MALE	WHITE	Stage III	[Not Applicable]	Muscle invasive urothelial carcinoma (pT2 or above)	High Grade	2012	[Not Available]	-22005	Alive	TUMOR FREE	783	#N/A	[Not Available]	#N/A	#N/A	#N/A	#N/A	Complete Remission/Response	#N/A	#N/A	0	783	0	783	0	783	0	783
272	TCGA-FD-A3SQ	BLCA	62	MALE	WHITE	Stage IV	[Not Applicable]	Muscle invasive urothelial carcinoma (pT2 or above)	High Grade	2008	[Not Available]	-22687	Dead	WITH TUMOR	#N/A	1423	[Not Available]	Locoregional (Urothelial tumor event)	Other, specify	sigmoid colon	991	Stable Disease	#N/A	#N/A	1	1423	1	1423	#N/A	#N/A	1	991
273	TCGA-FD-A3SR	BLCA	68	MALE	WHITE	Stage IV	[Not Applicable]	Muscle invasive urothelial carcinoma (pT2 or above)	High Grade	2010	[Not Available]	-24979	Dead	WITH TUMOR	#N/A	602	[Not Available]	Locoregional (Urothelial tumor event)	Other, specify	pelvis	372	[Unknown]	#N/A	#N/A	1	602	1	602	#N/A	#N/A	1	372
274	TCGA-FD-A3SS	BLCA	66	MALE	WHITE	Stage IV	[Not Applicable]	Muscle invasive urothelial carcinoma (pT2 or above)	High Grade	2012	[Not Available]	-24408	Dead	WITH TUMOR	#N/A	391	[Not Available]	Locoregional (Urothelial tumor event)	Other, specify	local & retroperitonium	220	[Unknown]	#N/A	#N/A	1	391	1	391	#N/A	#N/A	1	220
275	TCGA-FD-A43N	BLCA	76	MALE	WHITE	Stage III	[Not Applicable]	Muscle invasive urothelial carcinoma (pT2 or above)	High Grade	2011	[Not Available]	-27833	Alive	TUMOR FREE	699	#N/A	[Not Available]	#N/A	#N/A	#N/A	#N/A	[Not Applicable]	#N/A	#N/A	0	699	0	699	#N/A	#N/A	0	699
276	TCGA-FD-A43P	BLCA	74	MALE	BLACK OR AFRICAN AMERICAN	Stage II	[Not Applicable]	Muscle invasive urothelial carcinoma (pT2 or above)	High Grade	2012	[Not Available]	-27201	Alive	TUMOR FREE	832	#N/A	[Not Available]	#N/A	#N/A	#N/A	#N/A	Complete Remission/Response	#N/A	#N/A	0	832	0	832	0	832	0	832
277	TCGA-FD-A43S	BLCA	71	FEMALE	WHITE	Stage III	[Not Applicable]	Muscle invasive urothelial carcinoma (pT2 or above)	High Grade	2012	[Not Available]	-25993	Alive	TUMOR FREE	455	#N/A	[Not Available]	#N/A	#N/A	#N/A	#N/A	Complete Remission/Response	#N/A	#N/A	0	455	0	455	0	455	0	455
278	TCGA-FD-A43U	BLCA	70	MALE	WHITE	Stage IV	[Not Applicable]	Muscle invasive urothelial carcinoma (pT2 or above)	High Grade	2012	[Not Available]	-25841	Alive	WITH TUMOR	636	#N/A	[Not Available]	Distant Metastasis	Bone	#N/A	497	Complete Remission/Response	#N/A	#N/A	0	636	0	636	#N/A	#N/A	1	497
279	TCGA-FD-A43X	BLCA	84	MALE	WHITE	Stage II	[Not Applicable]	Muscle invasive urothelial carcinoma (pT2 or above)	High Grade	2012	[Not Available]	-30764	Alive	TUMOR FREE	110	#N/A	[Not Available]	#N/A	#N/A	#N/A	#N/A	Complete Remission/Response	#N/A	#N/A	0	110	0	110	0	110	0	110
280	TCGA-FD-A43Y	BLCA	65	MALE	WHITE	Stage III	[Not Applicable]	Muscle invasive urothelial carcinoma (pT2 or above)	High Grade	2012	[Not Available]	-23889	Dead	TUMOR FREE	#N/A	474	[Not Available]	#N/A	#N/A	#N/A	#N/A	Complete Remission/Response	#N/A	#N/A	1	474	0	474	0	474	0	474
281	TCGA-FD-A5BR	BLCA	57	MALE	WHITE	Stage II	[Not Applicable]	Muscle invasive urothelial carcinoma (pT2 or above)	High Grade	2012	[Not Available]	-20964	Alive	TUMOR FREE	813	#N/A	[Not Available]	#N/A	#N/A	#N/A	#N/A	Complete Remission/Response	#N/A	#N/A	0	813	0	813	0	813	0	813
282	TCGA-FD-A5BS	BLCA	68	MALE	WHITE	Stage III	[Not Applicable]	Muscle invasive urothelial carcinoma (pT2 or above)	High Grade	2009	[Not Available]	-24963	Alive	TUMOR FREE	1639	#N/A	[Not Available]	#N/A	#N/A	#N/A	#N/A	Complete Remission/Response	#N/A	#N/A	0	1639	0	1639	0	1639	0	1639
283	TCGA-FD-A5BT	BLCA	84	MALE	WHITE	Stage III	[Not Applicable]	Muscle invasive urothelial carcinoma (pT2 or above)	High Grade	2011	[Not Available]	-30686	Dead	TUMOR FREE	#N/A	328	[Not Available]	#N/A	#N/A	#N/A	#N/A	[Not Applicable]	#N/A	#N/A	1	328	0	328	#N/A	#N/A	0	328
284	TCGA-FD-A5BU	BLCA	76	FEMALE	BLACK OR AFRICAN AMERICAN	Stage II	[Not Applicable]	Muscle invasive urothelial carcinoma (pT2 or above)	High Grade	2012	[Not Available]	-27882	Alive	TUMOR FREE	588	#N/A	[Not Available]	#N/A	#N/A	#N/A	#N/A	Complete Remission/Response	#N/A	#N/A	0	588	0	588	0	588	0	588
285	TCGA-FD-A5BV	BLCA	47	FEMALE	WHITE	Stage III	[Not Applicable]	Muscle invasive urothelial carcinoma (pT2 or above)	High Grade	2012	[Not Available]	-17501	Dead	WITH TUMOR	#N/A	163	[Not Available]	Locoregional (Urothelial tumor event)	Other, specify	Peritoneal carcinomatosis	134	Progressive Disease	#N/A	#N/A	1	163	1	163	#N/A	#N/A	1	134
286	TCGA-FD-A5BX	BLCA	82	MALE	WHITE	Stage IV	[Not Applicable]	Muscle invasive urothelial carcinoma (pT2 or above)	High Grade	2012	[Not Available]	-30276	Dead	WITH TUMOR	#N/A	173	[Not Available]	Locoregional (Urothelial tumor event)	Lymph Node Only	#N/A	99	Progressive Disease	#N/A	#N/A	1	173	1	173	#N/A	#N/A	1	99
287	TCGA-FD-A5BY	BLCA	63	FEMALE	WHITE	Stage III	[Not Applicable]	Muscle invasive urothelial carcinoma (pT2 or above)	High Grade	2012	[Not Available]	-23080	Alive	TUMOR FREE	251	#N/A	[Not Available]	#N/A	#N/A	#N/A	#N/A	Complete Remission/Response	#N/A	#N/A	0	251	0	251	0	251	0	251
288	TCGA-FD-A5BZ	BLCA	77	FEMALE	WHITE	Stage IV	[Not Applicable]	Muscle invasive urothelial carcinoma (pT2 or above)	High Grade	2009	[Not Available]	-28451	Dead	WITH TUMOR	#N/A	835	[Not Available]	Locoregional (Urothelial tumor event)	Lymph Node Only	#N/A	533	[Not Applicable]	#N/A	#N/A	1	835	1	835	#N/A	#N/A	1	533
289	TCGA-FD-A5C0	BLCA	61	MALE	WHITE	Stage IV	[Not Applicable]	Muscle invasive urothelial carcinoma (pT2 or above)	High Grade	2012	[Not Available]	-22500	Dead	WITH TUMOR	#N/A	550	[Not Available]	New Primary Tumor	Lung	#N/A	27	Complete Remission/Response	#N/A	#N/A	1	550	1	550	#N/A	#N/A	1	27
290	TCGA-FD-A5C1	BLCA	61	FEMALE	WHITE	Stage III	[Not Applicable]	Muscle invasive urothelial carcinoma (pT2 or above)	High Grade	2009	[Not Available]	-22505	Alive	TUMOR FREE	1792	#N/A	[Not Available]	#N/A	#N/A	#N/A	#N/A	Complete Remission/Response	#N/A	#N/A	0	1792	0	1792	0	1792	0	1792
291	TCGA-FD-A62N	BLCA	69	MALE	ASIAN	Stage III	[Not Applicable]	Muscle invasive urothelial carcinoma (pT2 or above)	High Grade	2012	[Not Available]	-25297	Alive	TUMOR FREE	82	#N/A	[Not Available]	#N/A	#N/A	#N/A	#N/A	Complete Remission/Response	#N/A	#N/A	0	82	0	82	0	82	0	82
292	TCGA-FD-A62O	BLCA	74	MALE	WHITE	Stage IV	[Not Applicable]	Muscle invasive urothelial carcinoma (pT2 or above)	High Grade	2012	[Not Available]	-27310	Dead	TUMOR FREE	#N/A	216	[Not Available]	#N/A	#N/A	#N/A	#N/A	[Unknown]	#N/A	#N/A	1	216	0	216	#N/A	#N/A	0	216
293	TCGA-FD-A62P	BLCA	76	MALE	WHITE	Stage II	[Not Applicable]	Muscle invasive urothelial carcinoma (pT2 or above)	High Grade	2012	[Not Available]	-27843	Dead	WITH TUMOR	#N/A	191	[Not Available]	#N/A	#N/A	#N/A	#N/A	[Not Applicable]	#N/A	#N/A	1	191	1	191	#N/A	#N/A	1	191
294	TCGA-FD-A62S	BLCA	60	FEMALE	BLACK OR AFRICAN AMERICAN	Stage III	[Not Applicable]	Muscle invasive urothelial carcinoma (pT2 or above)	High Grade	2013	[Not Available]	-22000	Dead	WITH TUMOR	#N/A	406	[Not Available]	Distant Metastasis	Other, specify	sigmoid colon	306	Progressive Disease	#N/A	#N/A	1	406	1	406	#N/A	#N/A	1	306
295	TCGA-FD-A6TA	BLCA	58	MALE	WHITE	Stage IV	[Not Applicable]	Muscle invasive urothelial carcinoma (pT2 or above)	High Grade	2009	[Not Available]	-21196	Alive	TUMOR FREE	1912	#N/A	[Not Available]	#N/A	#N/A	#N/A	#N/A	Complete Remission/Response	#N/A	#N/A	0	1912	0	1912	#N/A	#N/A	0	1912
296	TCGA-FD-A6TB	BLCA	82	MALE	WHITE	Stage III	[Not Applicable]	Muscle invasive urothelial carcinoma (pT2 or above)	High Grade	2012	[Not Available]	-30185	Alive	TUMOR FREE	572	#N/A	[Not Available]	#N/A	#N/A	#N/A	#N/A	Complete Remission/Response	#N/A	#N/A	0	572	0	572	0	572	0	572
297	TCGA-FD-A6TC	BLCA	79	FEMALE	WHITE	Stage III	[Not Applicable]	Muscle invasive urothelial carcinoma (pT2 or above)	High Grade	2013	[Not Available]	-28963	Alive	TUMOR FREE	187	#N/A	[Not Available]	#N/A	#N/A	#N/A	#N/A	Complete Remission/Response	#N/A	#N/A	0	187	0	187	0	187	0	187
298	TCGA-FD-A6TD	BLCA	77	MALE	WHITE	Stage III	[Not Applicable]	Muscle invasive urothelial carcinoma (pT2 or above)	High Grade	2012	[Not Available]	-28328	Dead	TUMOR FREE	#N/A	386	[Not Available]	#N/A	#N/A	#N/A	#N/A	Complete Remission/Response	#N/A	#N/A	1	386	0	386	0	386	0	386
299	TCGA-FD-A6TE	BLCA	54	MALE	WHITE	Stage IV	[Not Applicable]	Muscle invasive urothelial carcinoma (pT2 or above)	High Grade	2013	[Not Available]	-19874	Alive	TUMOR FREE	376	#N/A	[Not Available]	Distant Metastasis	Other, specify	sacrum	321	[Unknown]	#N/A	#N/A	0	376	0	376	#N/A	#N/A	1	321
300	TCGA-FD-A6TF	BLCA	80	FEMALE	WHITE	Stage IV	[Not Applicable]	Muscle invasive urothelial carcinoma (pT2 or above)	High Grade	2013	[Not Available]	-29317	Dead	TUMOR FREE	#N/A	69	[Not Available]	#N/A	#N/A	#N/A	#N/A	Progressive Disease	#N/A	#N/A	1	69	0	69	#N/A	#N/A	0	69
301	TCGA-FD-A6TG	BLCA	73	MALE	WHITE	Stage IV	[Not Applicable]	Muscle invasive urothelial carcinoma (pT2 or above)	High Grade	2013	[Not Available]	-26893	Dead	TUMOR FREE	#N/A	93	[Not Available]	#N/A	#N/A	#N/A	#N/A	[Not Applicable]	#N/A	#N/A	1	93	0	93	#N/A	#N/A	0	93
302	TCGA-FD-A6TH	BLCA	63	MALE	WHITE	Stage IV	[Not Applicable]	Muscle invasive urothelial carcinoma (pT2 or above)	High Grade	2013	[Not Available]	-23236	Dead	WITH TUMOR	#N/A	131	[Not Available]	Distant Metastasis	Lung	#N/A	126	Complete Remission/Response	#N/A	#N/A	1	131	1	131	#N/A	#N/A	1	126
303	TCGA-FD-A6TI	BLCA	73	MALE	WHITE	Stage IV	[Not Applicable]	Muscle invasive urothelial carcinoma (pT2 or above)	High Grade	2013	[Not Available]	-26874	Dead	TUMOR FREE	#N/A	294	[Not Available]	#N/A	#N/A	#N/A	#N/A	[Unknown]	#N/A	#N/A	1	294	0	294	#N/A	#N/A	0	294
304	TCGA-FD-A6TK	BLCA	60	MALE	WHITE	Stage III	[Not Applicable]	Muscle invasive urothelial carcinoma (pT2 or above)	High Grade	2013	[Not Available]	-21942	Alive	TUMOR FREE	330	#N/A	[Not Available]	#N/A	#N/A	#N/A	#N/A	Complete Remission/Response	#N/A	#N/A	0	330	0	330	0	330	0	330
305	TCGA-FJ-A3Z7	BLCA	76	MALE	WHITE	Stage IV	[Not Applicable]	Muscle invasive urothelial carcinoma (pT2 or above)	High Grade	2010	[Not Available]	-28052	Alive	TUMOR FREE	945	#N/A	[Not Available]	#N/A	#N/A	#N/A	#N/A	Complete Remission/Response	#N/A	#N/A	0	945	0	945	#N/A	#N/A	0	945
306	TCGA-FJ-A3Z9	BLCA	72	MALE	WHITE	[Not Available]	[Not Applicable]	Muscle invasive urothelial carcinoma (pT2 or above)	High Grade	2012	[Not Available]	-26515	Dead	TUMOR FREE	#N/A	385	[Not Available]	#N/A	#N/A	#N/A	#N/A	Complete Remission/Response	#N/A	#N/A	1	385	0	385	0	385	0	385
307	TCGA-FJ-A3ZE	BLCA	65	MALE	WHITE	Stage IV	[Not Applicable]	Muscle invasive urothelial carcinoma (pT2 or above)	High Grade	2012	[Not Available]	-23866	Dead	WITH TUMOR	#N/A	324	[Not Available]	Distant Metastasis	Bone	#N/A	152	Progressive Disease	#N/A	#N/A	1	324	1	324	#N/A	#N/A	1	152
308	TCGA-FJ-A3ZF	BLCA	73	MALE	WHITE	Stage III	[Not Applicable]	Muscle invasive urothelial carcinoma (pT2 or above)	High Grade	2012	[Not Available]	-26825	Alive	TUMOR FREE	524	#N/A	[Not Available]	#N/A	#N/A	#N/A	#N/A	Complete Remission/Response	#N/A	#N/A	0	524	0	524	0	524	0	524
309	TCGA-FJ-A871	BLCA	49	MALE	WHITE	Stage III	[Not Applicable]	Muscle invasive urothelial carcinoma (pT2 or above)	High Grade	2013	[Not Available]	-18051	Dead	WITH TUMOR	#N/A	272	[Not Available]	Locoregional (Urothelial tumor event)	Other, specify	Pelvic	106	Progressive Disease	#N/A	#N/A	1	272	1	272	#N/A	#N/A	1	106
310	TCGA-FT-A3EE	BLCA	80	FEMALE	WHITE	Stage III	[Not Applicable]	Muscle invasive urothelial carcinoma (pT2 or above)	High Grade	2011	[Not Available]	-29293	Dead	TUMOR FREE	#N/A	99	[Not Available]	#N/A	#N/A	#N/A	#N/A	[Not Available]	#N/A	#N/A	1	99	0	99	#N/A	#N/A	0	99
311	TCGA-FT-A61P	BLCA	76	MALE	WHITE	Stage IV	[Not Applicable]	Muscle invasive urothelial carcinoma (pT2 or above)	High Grade	2013	[Not Available]	-28082	Alive	TUMOR FREE	337	#N/A	[Not Available]	#N/A	#N/A	#N/A	#N/A	Complete Remission/Response	#N/A	#N/A	0	337	0	337	#N/A	#N/A	0	337
312	TCGA-G2-A2EC	BLCA	58	FEMALE	BLACK OR AFRICAN AMERICAN	Stage II	[Not Applicable]	Muscle invasive urothelial carcinoma (pT2 or above)	High Grade	2010	[Not Available]	-21215	Dead	WITH TUMOR	#N/A	696	[Not Available]	Distant Metastasis	Other, specify	small bowel	679	Partial Remission/Response	#N/A	#N/A	1	696	1	696	#N/A	#N/A	1	679
313	TCGA-G2-A2EF	BLCA	50	MALE	WHITE	Stage II	[Not Applicable]	Muscle invasive urothelial carcinoma (pT2 or above)	High Grade	2007	[Not Available]	-18467	Alive	TUMOR FREE	1884	#N/A	[Not Available]	#N/A	#N/A	#N/A	#N/A	Partial Remission/Response	#N/A	#N/A	0	1884	0	1884	#N/A	#N/A	0	1884
314	TCGA-G2-A2EJ	BLCA	56	FEMALE	WHITE	Stage II	[Not Applicable]	Muscle invasive urothelial carcinoma (pT2 or above)	High Grade	2009	[Not Available]	-20649	Alive	TUMOR FREE	1460	#N/A	[Not Available]	Distant Metastasis	Lung	#N/A	910	Complete Remission/Response	#N/A	#N/A	0	1460	0	1460	1	910	1	910
315	TCGA-G2-A2EK	BLCA	57	MALE	WHITE	Stage II	[Not Applicable]	Muscle invasive urothelial carcinoma (pT2 or above)	High Grade	2010	[Not Available]	-20995	Alive	WITH TUMOR	485	#N/A	[Not Available]	Distant Metastasis	Renal Pelvis	#N/A	485	Stable Disease	#N/A	#N/A	0	485	0	485	#N/A	#N/A	1	485
316	TCGA-G2-A2EL	BLCA	77	MALE	WHITE	Stage II	[Not Applicable]	Muscle invasive urothelial carcinoma (pT2 or above)	High Grade	2009	[Not Available]	-28370	Dead	WITH TUMOR	#N/A	819	[Not Available]	Distant Metastasis	Bone	#N/A	105	Stable Disease	#N/A	#N/A	1	819	1	819	#N/A	#N/A	1	105
317	TCGA-G2-A2EO	BLCA	69	MALE	WHITE	Stage III	[Not Applicable]	Muscle invasive urothelial carcinoma (pT2 or above)	High Grade	2009	[Not Available]	-25440	Dead	TUMOR FREE	#N/A	1804	[Not Available]	#N/A	#N/A	#N/A	#N/A	Complete Remission/Response	#N/A	#N/A	1	1804	0	1804	0	1804	0	1804
318	TCGA-G2-A2ES	BLCA	85	MALE	WHITE	Stage II	[Not Applicable]	Muscle invasive urothelial carcinoma (pT2 or above)	High Grade	2009	[Not Available]	-31293	Dead	WITH TUMOR	#N/A	1004	[Not Available]	New Primary Tumor	Other, specify	#N/A	897	Progressive Disease	#N/A	#N/A	1	1004	1	1004	#N/A	#N/A	1	897
319	TCGA-G2-A3IB	BLCA	66	MALE	BLACK OR AFRICAN AMERICAN	Stage II	[Not Applicable]	Muscle invasive urothelial carcinoma (pT2 or above)	High Grade	2008	[Not Available]	-24149	Dead	WITH TUMOR	#N/A	220	[Not Available]	#N/A	#N/A	#N/A	#N/A	Progressive Disease	#N/A	#N/A	1	220	1	220	#N/A	#N/A	1	220
320	TCGA-G2-A3IE	BLCA	51	MALE	WHITE	Stage II	[Not Applicable]	Muscle invasive urothelial carcinoma (pT2 or above)	High Grade	2007	[Not Available]	-18983	Dead	WITH TUMOR	#N/A	612	[Not Available]	#N/A	#N/A	#N/A	#N/A	Progressive Disease	#N/A	#N/A	1	612	1	612	#N/A	#N/A	1	612
321	TCGA-G2-A3VY	BLCA	66	MALE	ASIAN	Stage II	[Not Applicable]	Muscle invasive urothelial carcinoma (pT2 or above)	High Grade	2012	[Not Available]	-24112	Alive	WITH TUMOR	536	#N/A	[Not Available]	#N/A	#N/A	#N/A	#N/A	Stable Disease	#N/A	#N/A	0	536	0	536	#N/A	#N/A	0	536
322	TCGA-G2-AA3B	BLCA	75	FEMALE	WHITE	Stage II	[Not Applicable]	Muscle invasive urothelial carcinoma (pT2 or above)	High Grade	2009	[Not Available]	-27646	Alive	TUMOR FREE	2008	#N/A	[Not Available]	#N/A	#N/A	#N/A	#N/A	Complete Remission/Response	#N/A	#N/A	0	2008	0	2008	0	2008	0	2008
323	TCGA-G2-AA3C	BLCA	66	MALE	WHITE	Stage IV	[Not Applicable]	Muscle invasive urothelial carcinoma (pT2 or above)	High Grade	2009	[Not Available]	-24267	Dead	WITH TUMOR	#N/A	211	[Not Available]	#N/A	#N/A	#N/A	#N/A	[Unknown]	#N/A	#N/A	1	211	1	211	#N/A	#N/A	1	211
324	TCGA-G2-AA3D	BLCA	60	MALE	WHITE	Stage IV	[Not Applicable]	Muscle invasive urothelial carcinoma (pT2 or above)	High Grade	2009	[Not Available]	-22205	Alive	TUMOR FREE	2139	#N/A	[Not Available]	#N/A	#N/A	#N/A	#N/A	Complete Remission/Response	#N/A	#N/A	0	2139	0	2139	#N/A	#N/A	0	2139
325	TCGA-G2-AA3F	BLCA	77	MALE	WHITE	Stage IV	[Not Applicable]	Muscle invasive urothelial carcinoma (pT2 or above)	High Grade	2012	[Not Available]	-28457	Alive	TUMOR FREE	893	#N/A	[Not Available]	#N/A	#N/A	#N/A	#N/A	Partial Remission/Response	#N/A	#N/A	0	893	0	893	#N/A	#N/A	0	893
326	TCGA-GC-A3BM	BLCA	70	MALE	WHITE	Stage II	[Not Applicable]	Muscle invasive urothelial carcinoma (pT2 or above)	High Grade	2010	[Not Available]	-25609	Dead	WITH TUMOR	#N/A	651	[Not Available]	#N/A	#N/A	#N/A	#N/A	Progressive Disease	#N/A	#N/A	1	651	1	651	#N/A	#N/A	1	651
327	TCGA-GC-A3I6	BLCA	45	MALE	WHITE	Stage III	[Not Applicable]	Muscle invasive urothelial carcinoma (pT2 or above)	High Grade	2011	[Not Available]	-16504	Dead	WITH TUMOR	#N/A	630	[Not Available]	Locoregional (Urothelial tumor event)	Bladder	#N/A	546	Progressive Disease	#N/A	#N/A	1	630	1	630	#N/A	#N/A	1	546
328	TCGA-GC-A3OO	BLCA	79	MALE	WHITE	Stage II	[Not Applicable]	Muscle invasive urothelial carcinoma (pT2 or above)	High Grade	2011	[Not Available]	-29065	Alive	TUMOR FREE	481	#N/A	[Not Available]	#N/A	#N/A	#N/A	#N/A	Complete Remission/Response	#N/A	#N/A	0	481	0	481	0	481	0	481
329	TCGA-GC-A3RB	BLCA	54	MALE	WHITE	Stage III	[Not Applicable]	Muscle invasive urothelial carcinoma (pT2 or above)	High Grade	2011	[Not Available]	-20021	Alive	TUMOR FREE	582	#N/A	[Not Available]	#N/A	#N/A	#N/A	#N/A	Complete Remission/Response	#N/A	#N/A	0	582	0	582	0	582	0	582
330	TCGA-GC-A3RC	BLCA	59	MALE	WHITE	Stage II	[Not Applicable]	Muscle invasive urothelial carcinoma (pT2 or above)	High Grade	2011	[Not Available]	-21668	Alive	TUMOR FREE	484	#N/A	[Not Available]	#N/A	#N/A	#N/A	#N/A	Complete Remission/Response	#N/A	#N/A	0	484	0	484	0	484	0	484
331	TCGA-GC-A3RD	BLCA	83	FEMALE	WHITE	Stage III	[Not Applicable]	Muscle invasive urothelial carcinoma (pT2 or above)	High Grade	2011	[Not Available]	-30529	Alive	TUMOR FREE	428	#N/A	[Not Available]	#N/A	#N/A	#N/A	#N/A	Complete Remission/Response	#N/A	#N/A	0	428	0	428	0	428	0	428
332	TCGA-GC-A3WC	BLCA	80	FEMALE	WHITE	Stage III	[Not Applicable]	Muscle invasive urothelial carcinoma (pT2 or above)	High Grade	2011	[Not Available]	-29295	Alive	TUMOR FREE	540	#N/A	[Not Available]	#N/A	#N/A	#N/A	#N/A	Complete Remission/Response	#N/A	#N/A	0	540	0	540	0	540	0	540
333	TCGA-GC-A3YS	BLCA	61	MALE	WHITE	Stage IV	[Not Applicable]	Muscle invasive urothelial carcinoma (pT2 or above)	High Grade	2012	[Not Available]	-22515	Alive	TUMOR FREE	758	#N/A	[Not Available]	#N/A	#N/A	#N/A	#N/A	Complete Remission/Response	#N/A	#N/A	0	758	0	758	#N/A	#N/A	0	758
334	TCGA-GC-A4ZW	BLCA	71	MALE	WHITE	Stage III	[Not Applicable]	Muscle invasive urothelial carcinoma (pT2 or above)	High Grade	2012	[Not Available]	-25964	Alive	TUMOR FREE	15	#N/A	[Not Available]	#N/A	#N/A	#N/A	#N/A	[Unknown]	#N/A	#N/A	0	15	0	15	#N/A	#N/A	0	15
335	TCGA-GC-A6I1	BLCA	90	FEMALE	WHITE	Stage II	[Not Applicable]	Muscle invasive urothelial carcinoma (pT2 or above)	High Grade	2012	[Not Available]	-32873	Dead	TUMOR FREE	#N/A	272	[Not Available]	#N/A	#N/A	#N/A	#N/A	Complete Remission/Response	#N/A	#N/A	1	272	0	272	0	272	0	272
336	TCGA-GC-A6I3	BLCA	90	FEMALE	BLACK OR AFRICAN AMERICAN	Stage IV	[Not Applicable]	Muscle invasive urothelial carcinoma (pT2 or above)	High Grade	2013	[Not Available]	-32873	Alive	TUMOR FREE	423	#N/A	[Not Available]	#N/A	#N/A	#N/A	#N/A	Complete Remission/Response	#N/A	#N/A	0	423	0	423	#N/A	#N/A	0	423
337	TCGA-GD-A2C5	BLCA	53	FEMALE	WHITE	Stage IV	[Not Applicable]	Muscle invasive urothelial carcinoma (pT2 or above)	High Grade	2011	[Not Available]	-19498	Alive	WITH TUMOR	812	#N/A	[Not Available]	Metastatic	Lung	#N/A	214	Progressive Disease	#N/A	#N/A	0	812	0	812	#N/A	#N/A	1	214
338	TCGA-GD-A3OP	BLCA	84	FEMALE	WHITE	Stage IV	[Not Applicable]	Muscle invasive urothelial carcinoma (pT2 or above)	High Grade	2011	[Not Available]	-30956	Alive	#N/A	64	#N/A	[Not Available]	#N/A	#N/A	#N/A	#N/A	[Unknown]	#N/A	#N/A	0	64	0	64	#N/A	#N/A	0	64
339	TCGA-GD-A3OQ	BLCA	48	MALE	WHITE	Stage IV	[Not Applicable]	Muscle invasive urothelial carcinoma (pT2 or above)	High Grade	2011	[Not Available]	-17682	Alive	#N/A	95	#N/A	[Not Available]	#N/A	#N/A	#N/A	#N/A	[Unknown]	#N/A	#N/A	0	95	0	95	#N/A	#N/A	0	95
340	TCGA-GD-A3OS	BLCA	54	FEMALE	WHITE	Stage II	[Not Applicable]	Muscle invasive urothelial carcinoma (pT2 or above)	High Grade	2011	[Not Available]	-19776	Alive	WITH TUMOR	638	#N/A	[Not Available]	Locoregional (Urothelial tumor event)	Bladder	#N/A	223	Progressive Disease	#N/A	#N/A	0	638	0	638	#N/A	#N/A	1	223
341	TCGA-GD-A6C6	BLCA	64	MALE	WHITE	Stage III	[Not Applicable]	Muscle invasive urothelial carcinoma (pT2 or above)	High Grade	2012	[Not Available]	-23631	Alive	TUMOR FREE	67	#N/A	[Not Available]	#N/A	#N/A	#N/A	#N/A	Complete Remission/Response	#N/A	#N/A	0	67	0	67	0	67	0	67
342	TCGA-GD-A76B	BLCA	86	FEMALE	WHITE	Stage II	[Not Applicable]	Muscle invasive urothelial carcinoma (pT2 or above)	High Grade	2013	[Not Available]	-31571	Alive	TUMOR FREE	224	#N/A	[Not Available]	#N/A	#N/A	#N/A	#N/A	Complete Remission/Response	#N/A	#N/A	0	224	0	224	0	224	0	224
343	TCGA-GU-A42P	BLCA	72	MALE	WHITE	Stage IV	[Not Applicable]	Muscle invasive urothelial carcinoma (pT2 or above)	High Grade	2012	[Not Available]	-26546	Dead	TUMOR FREE	#N/A	332	[Not Available]	#N/A	#N/A	#N/A	#N/A	Stable Disease	#N/A	#N/A	1	332	0	332	#N/A	#N/A	0	332
344	TCGA-GU-A42Q	BLCA	67	MALE	WHITE	Stage III	[Not Applicable]	Muscle invasive urothelial carcinoma (pT2 or above)	High Grade	2012	[Not Available]	-24534	Dead	TUMOR FREE	#N/A	344	[Not Available]	#N/A	#N/A	#N/A	#N/A	Complete Remission/Response	#N/A	#N/A	1	344	0	344	0	344	0	344
345	TCGA-GU-A42R	BLCA	68	MALE	WHITE	Stage IV	[Not Applicable]	Muscle invasive urothelial carcinoma (pT2 or above)	High Grade	2012	[Not Available]	-25134	Dead	WITH TUMOR	#N/A	577	[Not Available]	Distant Metastasis	Lung	#N/A	91	Progressive Disease	#N/A	#N/A	1	577	1	577	#N/A	#N/A	1	91
346	TCGA-GU-A762	BLCA	87	MALE	WHITE	Stage IV	[Not Applicable]	Muscle invasive urothelial carcinoma (pT2 or above)	High Grade	2012	[Not Available]	-31812	Dead	WITH TUMOR	#N/A	232	[Not Available]	#N/A	#N/A	#N/A	#N/A	Progressive Disease	#N/A	#N/A	1	232	1	232	#N/A	#N/A	1	232
347	TCGA-GU-A763	BLCA	72	MALE	WHITE	Stage III	[Not Applicable]	Muscle invasive urothelial carcinoma (pT2 or above)	High Grade	2012	[Not Available]	-26527	Alive	WITH TUMOR	997	#N/A	[Not Available]	Distant Metastasis	Lung	#N/A	303	Stable Disease	#N/A	#N/A	0	997	0	997	#N/A	#N/A	1	303
348	TCGA-GU-A764	BLCA	66	MALE	WHITE	Stage II	[Not Applicable]	Muscle invasive urothelial carcinoma (pT2 or above)	High Grade	2012	[Not Available]	-24343	Alive	TUMOR FREE	610	#N/A	[Not Available]	#N/A	#N/A	#N/A	#N/A	Complete Remission/Response	#N/A	#N/A	0	610	0	610	0	610	0	610
349	TCGA-GU-A766	BLCA	62	MALE	WHITE	Stage II	[Not Applicable]	Muscle invasive urothelial carcinoma (pT2 or above)	High Grade	2013	[Not Available]	-22774	Alive	WITH TUMOR	480	#N/A	[Not Available]	#N/A	#N/A	#N/A	#N/A	Progressive Disease	#N/A	#N/A	0	480	0	480	#N/A	#N/A	0	480
350	TCGA-GU-A767	BLCA	81	MALE	WHITE	Stage IV	[Not Applicable]	Muscle invasive urothelial carcinoma (pT2 or above)	High Grade	2012	[Not Available]	-29739	Dead	WITH TUMOR	#N/A	144	[Not Available]	#N/A	#N/A	#N/A	#N/A	Progressive Disease	#N/A	#N/A	1	144	1	144	#N/A	#N/A	1	144
351	TCGA-GU-AATO	BLCA	75	MALE	WHITE	Stage IV	[Not Applicable]	Muscle invasive urothelial carcinoma (pT2 or above)	High Grade	2013	[Not Available]	-27684	Dead	WITH TUMOR	#N/A	324	[Not Available]	#N/A	#N/A	#N/A	#N/A	Progressive Disease	#N/A	#N/A	1	324	1	324	#N/A	#N/A	1	324
352	TCGA-GU-AATP	BLCA	74	MALE	WHITE	Stage IV	[Not Applicable]	Muscle invasive urothelial carcinoma (pT2 or above)	High Grade	2012	[Not Available]	-27049	Alive	WITH TUMOR	1003	#N/A	[Not Available]	New Primary Tumor	Urethra	#N/A	596	Progressive Disease	#N/A	#N/A	0	1003	0	1003	#N/A	#N/A	1	596
353	TCGA-GU-AATQ	BLCA	68	MALE	WHITE	Stage III	[Not Applicable]	Muscle invasive urothelial carcinoma (pT2 or above)	High Grade	2013	[Not Available]	-25185	Dead	WITH TUMOR	#N/A	213	[Not Available]	#N/A	#N/A	#N/A	#N/A	Stable Disease	#N/A	#N/A	1	213	1	213	#N/A	#N/A	1	213
354	TCGA-GV-A3JV	BLCA	66	MALE	WHITE	Stage IV	[Not Applicable]	Muscle invasive urothelial carcinoma (pT2 or above)	High Grade	2011	[Not Available]	-24243	Dead	WITH TUMOR	#N/A	434	[Not Available]	Locoregional (Urothelial tumor event)	Bladder	#N/A	134	Partial Remission/Response	#N/A	#N/A	1	434	1	434	#N/A	#N/A	1	134
355	TCGA-GV-A3JW	BLCA	74	MALE	WHITE	Stage II	[Not Applicable]	Muscle invasive urothelial carcinoma (pT2 or above)	High Grade	2011	[Not Available]	-27091	Alive	WITH TUMOR	649	#N/A	[Not Available]	Distant Metastasis	Bone	#N/A	271	Stable Disease	#N/A	#N/A	0	649	0	649	#N/A	#N/A	1	271
356	TCGA-GV-A3JX	BLCA	59	MALE	WHITE	Stage III	[Not Applicable]	Muscle invasive urothelial carcinoma (pT2 or above)	High Grade	2011	[Not Available]	-21888	Alive	TUMOR FREE	581	#N/A	[Not Available]	#N/A	#N/A	#N/A	#N/A	Complete Remission/Response	#N/A	#N/A	0	581	0	581	0	581	0	581
357	TCGA-GV-A3JZ	BLCA	55	MALE	WHITE	Stage IV	[Not Applicable]	Muscle invasive urothelial carcinoma (pT2 or above)	High Grade	2011	[Not Available]	-20420	Alive	WITH TUMOR	603	#N/A	[Not Available]	#N/A	#N/A	#N/A	#N/A	Stable Disease	#N/A	#N/A	0	603	0	603	#N/A	#N/A	0	603
358	TCGA-GV-A3QF	BLCA	79	MALE	WHITE	Stage IV	[Not Applicable]	Muscle invasive urothelial carcinoma (pT2 or above)	High Grade	2011	[Not Available]	-28890	Dead	TUMOR FREE	#N/A	617	[Not Available]	#N/A	#N/A	#N/A	#N/A	Stable Disease	#N/A	#N/A	1	617	0	617	#N/A	#N/A	0	617
359	TCGA-GV-A3QG	BLCA	65	MALE	WHITE	Stage IV	[Not Applicable]	Muscle invasive urothelial carcinoma (pT2 or above)	High Grade	2011	[Not Available]	-23847	Dead	WITH TUMOR	#N/A	#N/A	[Not Available]	Distant Metastasis	Other, specify	Brain	84	[Not Applicable]	#N/A	#N/A	1	#N/A	1	#N/A	#N/A	#N/A	1	84
360	TCGA-GV-A3QH	BLCA	67	MALE	WHITE	Stage II	[Not Applicable]	Muscle invasive urothelial carcinoma (pT2 or above)	High Grade	2011	[Not Available]	-24681	Dead	TUMOR FREE	#N/A	258	[Not Available]	Locoregional (Urothelial tumor event)	Bladder	#N/A	125	Stable Disease	#N/A	#N/A	1	258	0	258	#N/A	#N/A	1	125
361	TCGA-GV-A3QI	BLCA	47	MALE	WHITE	Stage III	[Not Applicable]	Muscle invasive urothelial carcinoma (pT2 or above)	High Grade	2011	[Not Available]	-17383	Alive	WITH TUMOR	1110	#N/A	[Not Available]	Distant Metastasis	Other, specify	Abdominal wall	768	Complete Remission/Response	#N/A	#N/A	0	1110	0	1110	1	768	1	768
362	TCGA-GV-A3QK	BLCA	56	FEMALE	WHITE	Stage IV	[Not Applicable]	Muscle invasive urothelial carcinoma (pT2 or above)	High Grade	2012	[Not Available]	-20802	Alive	WITH TUMOR	832	#N/A	[Not Available]	#N/A	#N/A	#N/A	#N/A	Stable Disease	#N/A	#N/A	0	832	0	832	#N/A	#N/A	0	832
363	TCGA-GV-A40E	BLCA	75	MALE	WHITE	Stage II	[Not Applicable]	Muscle invasive urothelial carcinoma (pT2 or above)	High Grade	2012	[Not Available]	-27569	Dead	WITH TUMOR	#N/A	261	[Not Available]	Distant Metastasis	Lung	#N/A	219	Stable Disease	#N/A	#N/A	1	261	1	261	#N/A	#N/A	1	219
364	TCGA-GV-A40G	BLCA	77	MALE	WHITE	Stage II	[Not Applicable]	Muscle invasive urothelial carcinoma (pT2 or above)	High Grade	2012	[Not Available]	-28204	Alive	TUMOR FREE	580	#N/A	[Not Available]	#N/A	#N/A	#N/A	#N/A	Complete Remission/Response	#N/A	#N/A	0	580	0	580	0	580	0	580
365	TCGA-GV-A6ZA	BLCA	54	MALE	WHITE	Stage II	[Not Applicable]	Muscle invasive urothelial carcinoma (pT2 or above)	High Grade	2012	[Not Available]	-19871	Alive	TUMOR FREE	691	#N/A	[Not Available]	#N/A	#N/A	#N/A	#N/A	Complete Remission/Response	#N/A	#N/A	0	691	0	691	0	691	0	691
366	TCGA-H4-A2HO	BLCA	53	MALE	WHITE	Stage III	[Not Applicable]	Muscle invasive urothelial carcinoma (pT2 or above)	High Grade	2010	[Not Available]	-19630	Alive	TUMOR FREE	46	#N/A	[Not Available]	#N/A	#N/A	#N/A	#N/A	Complete Remission/Response	#N/A	#N/A	0	46	0	46	0	46	0	46
367	TCGA-H4-A2HQ	BLCA	64	FEMALE	BLACK OR AFRICAN AMERICAN	Stage IV	[Not Applicable]	Muscle invasive urothelial carcinoma (pT2 or above)	High Grade	2010	[Not Available]	-23538	Alive	WITH TUMOR	590	#N/A	[Not Available]	Distant Metastasis	Lung	#N/A	318	Complete Remission/Response	#N/A	#N/A	0	590	0	590	#N/A	#N/A	1	318
368	TCGA-HQ-A2OE	BLCA	69	MALE	[Not Evaluated]	[Not Available]	[Not Applicable]	Muscle invasive urothelial carcinoma (pT2 or above)	[Unknown]	2007	[Not Available]	#N/A	Alive	#N/A	1174	#N/A	[Not Available]	#N/A	#N/A	#N/A	#N/A	[Unknown]	#N/A	#N/A	0	1174	0	1174	#N/A	#N/A	0	1174
369	TCGA-HQ-A2OF	BLCA	52	FEMALE	[Not Evaluated]	Stage III	[Not Applicable]	Muscle invasive urothelial carcinoma (pT2 or above)	High Grade	#N/A	[Not Available]	-19016	Alive	TUMOR FREE	1947	#N/A	[Not Available]	Locoregional (Urothelial tumor event)	Lymph Node Only	#N/A	907	Complete Remission/Response	#N/A	#N/A	0	1947	0	1947	1	907	1	907
370	TCGA-HQ-A5ND	BLCA	78	MALE	[Not Evaluated]	Stage IV	[Not Applicable]	Muscle invasive urothelial carcinoma (pT2 or above)	High Grade	#N/A	[Not Available]	-28555	Dead	WITH TUMOR	#N/A	274	[Not Available]	Distant Metastasis	Lymph Node Only	#N/A	84	Progressive Disease	#N/A	#N/A	1	274	1	274	#N/A	#N/A	1	84
371	TCGA-HQ-A5NE	BLCA	57	MALE	[Not Evaluated]	Stage III	[Not Applicable]	Muscle invasive urothelial carcinoma (pT2 or above)	High Grade	#N/A	[Not Available]	-20647	Dead	WITH TUMOR	#N/A	370	[Not Available]	Distant Metastasis	Renal Pelvis	#N/A	211	Complete Remission/Response	#N/A	#N/A	1	370	1	370	1	211	1	211
372	TCGA-K4-A3WS	BLCA	66	MALE	WHITE	Stage III	[Not Applicable]	Muscle invasive urothelial carcinoma (pT2 or above)	High Grade	2011	[Not Available]	-24124	Alive	TUMOR FREE	761	#N/A	[Not Available]	#N/A	#N/A	#N/A	#N/A	Complete Remission/Response	#N/A	#N/A	0	761	0	761	0	761	0	761
373	TCGA-K4-A3WU	BLCA	87	MALE	WHITE	Stage III	[Not Applicable]	Muscle invasive urothelial carcinoma (pT2 or above)	High Grade	2012	[Not Available]	-32134	Alive	TUMOR FREE	105	#N/A	[Not Available]	#N/A	#N/A	#N/A	#N/A	[Not Applicable]	#N/A	#N/A	0	105	0	105	#N/A	#N/A	0	105
374	TCGA-K4-A3WV	BLCA	77	FEMALE	WHITE	Stage II	[Not Applicable]	Muscle invasive urothelial carcinoma (pT2 or above)	High Grade	2011	[Not Available]	-28444	Alive	TUMOR FREE	646	#N/A	[Not Available]	#N/A	#N/A	#N/A	#N/A	[Not Applicable]	#N/A	#N/A	0	646	0	646	#N/A	#N/A	0	646
375	TCGA-K4-A4AB	BLCA	76	MALE	WHITE	Stage III	[Not Applicable]	Muscle invasive urothelial carcinoma (pT2 or above)	High Grade	2012	[Not Available]	-27922	Alive	#N/A	84	#N/A	[Not Available]	#N/A	#N/A	#N/A	#N/A	Partial Remission/Response	#N/A	#N/A	0	84	0	84	#N/A	#N/A	0	84
376	TCGA-K4-A4AC	BLCA	83	MALE	WHITE	Stage II	[Not Applicable]	Muscle invasive urothelial carcinoma (pT2 or above)	High Grade	2012	[Not Available]	-30655	Dead	WITH TUMOR	#N/A	278	[Not Available]	Distant Metastasis	Other, specify	psoas	170	Partial Remission/Response	#N/A	#N/A	1	278	1	278	#N/A	#N/A	1	170
377	TCGA-K4-A54R	BLCA	59	MALE	WHITE	Stage II	[Not Applicable]	Muscle invasive urothelial carcinoma (pT2 or above)	High Grade	2012	[Not Available]	-21601	Alive	TUMOR FREE	842	#N/A	[Not Available]	#N/A	#N/A	#N/A	#N/A	Complete Remission/Response	#N/A	#N/A	0	842	0	842	0	842	0	842
378	TCGA-K4-A5RH	BLCA	69	MALE	WHITE	Stage III	[Not Applicable]	Muscle invasive urothelial carcinoma (pT2 or above)	High Grade	2012	[Not Available]	-25305	Alive	WITH TUMOR	276	#N/A	[Not Available]	Distant Metastasis	Lung	#N/A	196	Progressive Disease	#N/A	#N/A	0	276	0	276	#N/A	#N/A	1	196
379	TCGA-K4-A5RI	BLCA	67	FEMALE	WHITE	Stage III	[Not Applicable]	Muscle invasive urothelial carcinoma (pT2 or above)	High Grade	2012	[Not Available]	-24614	Dead	WITH TUMOR	#N/A	356	[Not Available]	Locoregional (Urothelial tumor event)	Other, specify	ileum	236	Progressive Disease	#N/A	#N/A	1	356	1	356	#N/A	#N/A	1	236
380	TCGA-K4-A5RJ	BLCA	75	MALE	WHITE	Stage II	[Not Applicable]	Muscle invasive urothelial carcinoma (pT2 or above)	High Grade	2012	[Not Available]	-27518	Alive	TUMOR FREE	539	#N/A	[Not Available]	#N/A	#N/A	#N/A	#N/A	Complete Remission/Response	#N/A	#N/A	0	539	0	539	0	539	0	539
381	TCGA-K4-A6FZ	BLCA	75	FEMALE	WHITE	Stage III	[Not Applicable]	Muscle invasive urothelial carcinoma (pT2 or above)	High Grade	2012	[Not Available]	-27686	Alive	TUMOR FREE	55	#N/A	[Not Available]	#N/A	#N/A	#N/A	#N/A	Complete Remission/Response	#N/A	#N/A	0	55	0	55	0	55	0	55
382	TCGA-K4-A6MB	BLCA	64	MALE	WHITE	Stage IV	[Not Applicable]	Muscle invasive urothelial carcinoma (pT2 or above)	High Grade	2013	[Not Available]	-23664	Alive	TUMOR FREE	469	#N/A	[Not Available]	#N/A	#N/A	#N/A	#N/A	Complete Remission/Response	#N/A	#N/A	0	469	0	469	#N/A	#N/A	0	469
383	TCGA-K4-A83P	BLCA	77	MALE	WHITE	Stage IV	[Not Applicable]	Muscle invasive urothelial carcinoma (pT2 or above)	[Unknown]	2013	[Not Available]	-28463	Alive	WITH TUMOR	495	#N/A	[Not Available]	Distant Metastasis	Liver	#N/A	70	Partial Remission/Response	#N/A	#N/A	0	495	0	495	#N/A	#N/A	1	70
384	TCGA-K4-AAQO	BLCA	56	MALE	WHITE	Stage III	[Not Applicable]	Muscle invasive urothelial carcinoma (pT2 or above)	High Grade	2013	[Not Available]	-20683	Alive	#N/A	359	#N/A	[Not Available]	#N/A	#N/A	#N/A	#N/A	[Unknown]	#N/A	#N/A	0	359	0	359	#N/A	#N/A	0	359
385	TCGA-KQ-A41N	BLCA	73	MALE	BLACK OR AFRICAN AMERICAN	Stage III	[Not Applicable]	Muscle invasive urothelial carcinoma (pT2 or above)	High Grade	2011	[Not Available]	-26837	Alive	TUMOR FREE	1604	#N/A	[Not Available]	#N/A	#N/A	#N/A	#N/A	Complete Remission/Response	#N/A	#N/A	0	1604	0	1604	0	1604	0	1604
386	TCGA-KQ-A41O	BLCA	84	MALE	[Unknown]	Stage IV	[Not Applicable]	Muscle invasive urothelial carcinoma (pT2 or above)	High Grade	2011	[Not Available]	-30774	Alive	TUMOR FREE	1538	#N/A	[Not Available]	#N/A	#N/A	#N/A	#N/A	Complete Remission/Response	#N/A	#N/A	0	1538	0	1538	#N/A	#N/A	0	1538
387	TCGA-KQ-A41P	BLCA	76	MALE	WHITE	Stage IV	[Not Applicable]	Muscle invasive urothelial carcinoma (pT2 or above)	High Grade	2011	[Not Available]	-27816	Alive	WITH TUMOR	1094	#N/A	[Not Available]	Locoregional (Urothelial tumor event)	Lymph Node Only	#N/A	178	Stable Disease	#N/A	#N/A	0	1094	0	1094	#N/A	#N/A	1	178
388	TCGA-KQ-A41Q	BLCA	89	MALE	WHITE	Stage III	[Not Applicable]	Muscle invasive urothelial carcinoma (pT2 or above)	High Grade	2009	[Not Available]	-32511	Alive	#N/A	1429	#N/A	[Not Available]	Locoregional (Urothelial tumor event)	Lymph Node Only	#N/A	1314	[Unknown]	#N/A	#N/A	0	1429	0	1429	#N/A	#N/A	1	1314
389	TCGA-KQ-A41R	BLCA	80	FEMALE	WHITE	Stage II	[Not Applicable]	Muscle invasive urothelial carcinoma (pT2 or above)	High Grade	2011	[Not Available]	-29351	Alive	TUMOR FREE	1350	#N/A	[Not Available]	#N/A	#N/A	#N/A	#N/A	Complete Remission/Response	#N/A	#N/A	0	1350	0	1350	0	1350	0	1350
390	TCGA-KQ-A41S	BLCA	87	FEMALE	WHITE	Stage III	[Not Applicable]	Muscle invasive urothelial carcinoma (pT2 or above)	High Grade	2011	[Not Available]	-32041	Alive	TUMOR FREE	35	#N/A	[Not Available]	#N/A	#N/A	#N/A	#N/A	Complete Remission/Response	#N/A	#N/A	0	35	0	35	0	35	0	35
391	TCGA-LC-A66R	BLCA	78	MALE	WHITE	Stage IV	[Not Applicable]	Muscle invasive urothelial carcinoma (pT2 or above)	High Grade	2012	[Not Available]	-28793	Alive	TUMOR FREE	466	#N/A	[Not Available]	#N/A	#N/A	#N/A	#N/A	Complete Remission/Response	#N/A	#N/A	0	466	0	466	#N/A	#N/A	0	466
392	TCGA-LT-A5Z6	BLCA	56	MALE	WHITE	Stage II	[Not Applicable]	Muscle invasive urothelial carcinoma (pT2 or above)	High Grade	2013	[Not Available]	-20746	Alive	TUMOR FREE	474	#N/A	[Not Available]	#N/A	#N/A	#N/A	#N/A	Complete Remission/Response	#N/A	#N/A	0	474	0	474	0	474	0	474
393	TCGA-LT-A8JT	BLCA	69	FEMALE	WHITE	Stage II	[Not Applicable]	Muscle invasive urothelial carcinoma (pT2 or above)	High Grade	2013	[Not Available]	-25498	Alive	TUMOR FREE	641	#N/A	[Not Available]	#N/A	#N/A	#N/A	#N/A	Complete Remission/Response	#N/A	#N/A	0	641	0	641	0	641	0	641
394	TCGA-MV-A51V	BLCA	75	MALE	WHITE	Stage III	[Not Applicable]	Muscle invasive urothelial carcinoma (pT2 or above)	High Grade	2012	[Not Available]	-27430	Alive	TUMOR FREE	410	#N/A	[Not Available]	#N/A	#N/A	#N/A	#N/A	Complete Remission/Response	#N/A	#N/A	0	410	0	410	0	410	0	410
395	TCGA-PQ-A6FI	BLCA	70	MALE	WHITE	Stage II	[Not Applicable]	Muscle invasive urothelial carcinoma (pT2 or above)	High Grade	2011	[Not Available]	-25672	Alive	TUMOR FREE	372	#N/A	[Not Available]	#N/A	#N/A	#N/A	#N/A	Complete Remission/Response	#N/A	#N/A	0	372	0	372	0	372	0	372
396	TCGA-PQ-A6FN	BLCA	78	FEMALE	WHITE	Stage III	[Not Applicable]	Muscle invasive urothelial carcinoma (pT2 or above)	High Grade	2011	[Not Available]	-28546	Alive	#N/A	507	#N/A	[Not Available]	#N/A	#N/A	#N/A	#N/A	[Unknown]	#N/A	#N/A	0	507	0	507	#N/A	#N/A	0	507
397	TCGA-R3-A69X	BLCA	70	MALE	WHITE	Stage III	[Not Applicable]	Muscle invasive urothelial carcinoma (pT2 or above)	High Grade	2012	[Not Available]	-25576	Alive	TUMOR FREE	433	#N/A	[Not Available]	#N/A	#N/A	#N/A	#N/A	Complete Remission/Response	#N/A	#N/A	0	433	0	433	0	433	0	433
398	TCGA-S5-A6DX	BLCA	83	MALE	WHITE	Stage IV	[Not Applicable]	Muscle invasive urothelial carcinoma (pT2 or above)	High Grade	2013	[Not Available]	-30594	Dead	WITH TUMOR	#N/A	56	[Not Available]	#N/A	#N/A	#N/A	#N/A	[Unknown]	#N/A	#N/A	1	56	1	56	#N/A	#N/A	1	56
399	TCGA-S5-AA26	BLCA	46	MALE	BLACK OR AFRICAN AMERICAN	Stage III	[Not Applicable]	Muscle invasive urothelial carcinoma (pT2 or above)	High Grade	2013	[Not Available]	-16972	Alive	TUMOR FREE	503	#N/A	[Not Available]	#N/A	#N/A	#N/A	#N/A	Complete Remission/Response	#N/A	#N/A	0	503	0	503	0	503	0	503
400	TCGA-SY-A9G0	BLCA	82	MALE	WHITE	Stage IV	[Not Applicable]	Muscle invasive urothelial carcinoma (pT2 or above)	High Grade	2011	[Not Available]	-30205	Dead	TUMOR FREE	#N/A	1008	[Not Available]	#N/A	#N/A	#N/A	#N/A	Complete Remission/Response	#N/A	#N/A	1	1008	0	1008	#N/A	#N/A	0	1008
401	TCGA-SY-A9G5	BLCA	66	MALE	WHITE	Stage III	[Not Applicable]	Muscle invasive urothelial carcinoma (pT2 or above)	High Grade	2011	[Not Available]	-24260	Alive	TUMOR FREE	1186	#N/A	[Not Available]	#N/A	#N/A	#N/A	#N/A	Complete Remission/Response	#N/A	#N/A	0	1186	0	1186	0	1186	0	1186
402	TCGA-UY-A78K	BLCA	60	MALE	WHITE	Stage IV	[Not Applicable]	Muscle invasive urothelial carcinoma (pT2 or above)	High Grade	#N/A	[Not Available]	-22020	Dead	#N/A	#N/A	536	[Not Available]	#N/A	#N/A	#N/A	#N/A	Complete Remission/Response	#N/A	#N/A	1	536	#N/A	536	#N/A	#N/A	0	536
403	TCGA-UY-A78L	BLCA	62	MALE	WHITE	Stage IV	[Not Applicable]	Muscle invasive urothelial carcinoma (pT2 or above)	High Grade	#N/A	[Not Available]	-22717	Alive	WITH TUMOR	1127	#N/A	[Not Available]	#N/A	#N/A	#N/A	355	Progressive Disease	#N/A	#N/A	0	1127	0	1127	#N/A	#N/A	1	355
404	TCGA-UY-A78M	BLCA	81	FEMALE	ASIAN	Stage IV	[Not Applicable]	Muscle invasive urothelial carcinoma (pT2 or above)	High Grade	#N/A	[Not Available]	-29706	Dead	WITH TUMOR	#N/A	690	[Not Available]	#N/A	#N/A	#N/A	#N/A	[Unknown]	#N/A	#N/A	1	690	1	690	#N/A	#N/A	1	690
405	TCGA-UY-A78N	BLCA	80	MALE	WHITE	Stage IV	[Not Applicable]	Muscle invasive urothelial carcinoma (pT2 or above)	High Grade	#N/A	[Not Available]	-29132	Dead	WITH TUMOR	#N/A	2641	[Not Available]	Distant Metastasis	Renal Pelvis	#N/A	2472	Complete Remission/Response	#N/A	#N/A	1	2641	1	2641	#N/A	#N/A	1	2472
406	TCGA-UY-A78O	BLCA	75	FEMALE	WHITE	Stage II	[Not Applicable]	Muscle invasive urothelial carcinoma (pT2 or above)	High Grade	#N/A	[Not Available]	-27234	Alive	TUMOR FREE	2312	#N/A	[Not Available]	#N/A	#N/A	#N/A	#N/A	Complete Remission/Response	#N/A	#N/A	0	2312	0	2312	0	2312	0	2312
407	TCGA-UY-A78P	BLCA	78	FEMALE	WHITE	Stage II	[Not Applicable]	Muscle invasive urothelial carcinoma (pT2 or above)	High Grade	#N/A	[Not Available]	-28719	Alive	TUMOR FREE	2380	#N/A	[Not Available]	#N/A	#N/A	#N/A	#N/A	Complete Remission/Response	#N/A	#N/A	0	2380	0	2380	0	2380	0	2380
408	TCGA-UY-A8OB	BLCA	63	MALE	WHITE	Stage IV	[Not Applicable]	Muscle invasive urothelial carcinoma (pT2 or above)	High Grade	#N/A	[Not Available]	-23360	Alive	TUMOR FREE	2109	#N/A	[Not Available]	#N/A	#N/A	#N/A	#N/A	Complete Remission/Response	#N/A	#N/A	0	2109	0	2109	#N/A	#N/A	0	2109
409	TCGA-UY-A8OC	BLCA	90	MALE	WHITE	Stage IV	[Not Applicable]	Muscle invasive urothelial carcinoma (pT2 or above)	High Grade	#N/A	[Not Available]	-32918	Dead	WITH TUMOR	#N/A	92	[Not Available]	Distant Metastasis	Lymph Node Only	#N/A	32	Partial Remission/Response	#N/A	#N/A	1	92	1	92	#N/A	#N/A	1	32
410	TCGA-UY-A8OD	BLCA	68	FEMALE	BLACK OR AFRICAN AMERICAN	Stage II	[Not Applicable]	Muscle invasive urothelial carcinoma (pT2 or above)	High Grade	#N/A	[Not Available]	-24588	Alive	TUMOR FREE	3432	#N/A	[Not Available]	#N/A	#N/A	#N/A	#N/A	Complete Remission/Response	#N/A	#N/A	0	3432	0	3432	0	3432	0	3432
411	TCGA-UY-A9PA	BLCA	48	MALE	WHITE	Stage III	[Not Applicable]	Muscle invasive urothelial carcinoma (pT2 or above)	High Grade	#N/A	[Not Available]	-17520	Alive	TUMOR FREE	1072	#N/A	[Not Available]	#N/A	#N/A	#N/A	#N/A	Complete Remission/Response	#N/A	#N/A	0	1072	0	1072	0	1072	0	1072
412	TCGA-UY-A9PB	BLCA	49	MALE	WHITE	Stage III	[Not Applicable]	Muscle invasive urothelial carcinoma (pT2 or above)	High Grade	#N/A	[Not Available]	-17885	Alive	TUMOR FREE	899	#N/A	[Not Available]	#N/A	#N/A	#N/A	#N/A	Complete Remission/Response	#N/A	#N/A	0	899	0	899	0	899	0	899
413	TCGA-UY-A9PD	BLCA	80	MALE	WHITE	Stage III	[Not Applicable]	Muscle invasive urothelial carcinoma (pT2 or above)	High Grade	#N/A	[Not Available]	-29565	Alive	TUMOR FREE	542	#N/A	[Not Available]	#N/A	#N/A	#N/A	#N/A	Complete Remission/Response	#N/A	#N/A	0	542	0	542	0	542	0	542
414	TCGA-UY-A9PE	BLCA	86	MALE	WHITE	Stage IV	[Not Applicable]	Muscle invasive urothelial carcinoma (pT2 or above)	High Grade	#N/A	[Not Available]	-31755	Alive	WITH TUMOR	189	#N/A	[Not Available]	Distant Metastasis	Lung	#N/A	473	Complete Remission/Response	#N/A	#N/A	0	189	0	189	#N/A	#N/A	1	473
415	TCGA-UY-A9PF	BLCA	77	MALE	WHITE	Stage IV	[Not Applicable]	Muscle invasive urothelial carcinoma (pT2 or above)	High Grade	#N/A	[Not Available]	-28470	Alive	TUMOR FREE	117	#N/A	[Not Available]	#N/A	#N/A	#N/A	#N/A	Complete Remission/Response	#N/A	#N/A	0	117	0	117	#N/A	#N/A	0	117
416	TCGA-UY-A9PH	BLCA	73	MALE	WHITE	Stage II	[Not Applicable]	Muscle invasive urothelial carcinoma (pT2 or above)	High Grade	#N/A	[Not Available]	-26654	Alive	TUMOR FREE	1561	#N/A	[Not Available]	#N/A	#N/A	#N/A	#N/A	Complete Remission/Response	#N/A	#N/A	0	1561	0	1561	0	1561	0	1561
417	TCGA-XF-A8HB	BLCA	50	FEMALE	[Unknown]	Stage II	[Not Applicable]	Muscle invasive urothelial carcinoma (pT2 or above)	High Grade	2006	[Not Available]	-18544	Alive	TUMOR FREE	1370	#N/A	[Not Available]	#N/A	#N/A	#N/A	#N/A	Complete Remission/Response	#N/A	#N/A	0	1370	0	1370	0	1370	0	1370
418	TCGA-XF-A8HC	BLCA	79	MALE	ASIAN	Stage IV	[Not Applicable]	Muscle invasive urothelial carcinoma (pT2 or above)	High Grade	2005	[Not Available]	-28996	Dead	#N/A	#N/A	200	[Not Available]	#N/A	#N/A	#N/A	#N/A	[Unknown]	#N/A	#N/A	1	200	#N/A	200	#N/A	#N/A	0	200
419	TCGA-XF-A8HD	BLCA	77	MALE	WHITE	Stage III	[Not Applicable]	Muscle invasive urothelial carcinoma (pT2 or above)	High Grade	2006	[Not Available]	-28305	Alive	TUMOR FREE	2964	#N/A	[Not Available]	#N/A	#N/A	#N/A	#N/A	Complete Remission/Response	#N/A	#N/A	0	2964	0	2964	0	2964	0	2964
420	TCGA-XF-A8HE	BLCA	47	MALE	WHITE	Stage III	[Not Applicable]	Muscle invasive urothelial carcinoma (pT2 or above)	High Grade	2004	[Not Available]	-17212	Alive	TUMOR FREE	3817	#N/A	[Not Available]	#N/A	#N/A	#N/A	#N/A	Complete Remission/Response	#N/A	#N/A	0	3817	0	3817	0	3817	0	3817
421	TCGA-XF-A8HF	BLCA	80	MALE	WHITE	Stage III	[Not Applicable]	Muscle invasive urothelial carcinoma (pT2 or above)	High Grade	2004	[Not Available]	-29288	Dead	TUMOR FREE	#N/A	2954	[Not Available]	#N/A	#N/A	#N/A	#N/A	Complete Remission/Response	#N/A	#N/A	1	2954	0	2954	0	2954	0	2954
422	TCGA-XF-A8HG	BLCA	69	MALE	WHITE	Stage III	[Not Applicable]	Muscle invasive urothelial carcinoma (pT2 or above)	High Grade	2005	[Not Available]	-25421	Dead	WITH TUMOR	#N/A	467	[Not Available]	Distant Metastasis	Liver	#N/A	398	Complete Remission/Response	#N/A	#N/A	1	467	1	467	1	398	1	398
423	TCGA-XF-A8HH	BLCA	61	FEMALE	WHITE	Stage IV	[Not Applicable]	Muscle invasive urothelial carcinoma (pT2 or above)	High Grade	2004	[Not Available]	-22393	Dead	WITH TUMOR	#N/A	57	[Not Available]	#N/A	#N/A	#N/A	#N/A	Partial Remission/Response	#N/A	#N/A	1	57	1	57	#N/A	#N/A	1	57
424	TCGA-XF-A8HI	BLCA	57	FEMALE	WHITE	Stage IV	[Not Applicable]	Muscle invasive urothelial carcinoma (pT2 or above)	High Grade	2005	[Not Available]	-21059	Dead	WITH TUMOR	#N/A	544	[Not Available]	Distant Metastasis	Lung	#N/A	468	Progressive Disease	#N/A	#N/A	1	544	1	544	#N/A	#N/A	1	468
425	TCGA-XF-A9SG	BLCA	81	MALE	[Unknown]	Stage II	[Not Applicable]	Muscle invasive urothelial carcinoma (pT2 or above)	High Grade	2006	[Not Available]	-29825	Alive	TUMOR FREE	1479	#N/A	[Not Available]	#N/A	#N/A	#N/A	#N/A	Complete Remission/Response	#N/A	#N/A	0	1479	0	1479	0	1479	0	1479
426	TCGA-XF-A9SH	BLCA	65	FEMALE	ASIAN	Stage II	[Not Applicable]	Muscle invasive urothelial carcinoma (pT2 or above)	High Grade	2005	[Not Available]	-24060	Dead	WITH TUMOR	#N/A	1971	[Not Available]	Locoregional (Urothelial tumor event)	Lymph Node Only	#N/A	547	Stable Disease	#N/A	#N/A	1	1971	1	1971	#N/A	#N/A	1	547
427	TCGA-XF-A9SI	BLCA	73	FEMALE	ASIAN	Stage II	[Not Applicable]	Muscle invasive urothelial carcinoma (pT2 or above)	High Grade	2006	[Not Available]	-26719	Alive	TUMOR FREE	2423	#N/A	[Not Available]	#N/A	#N/A	#N/A	#N/A	Complete Remission/Response	#N/A	#N/A	0	2423	0	2423	0	2423	0	2423
428	TCGA-XF-A9SJ	BLCA	83	MALE	WHITE	Stage IV	[Not Applicable]	Muscle invasive urothelial carcinoma (pT2 or above)	High Grade	2004	[Not Available]	-30362	Dead	WITH TUMOR	#N/A	98	[Not Available]	#N/A	#N/A	#N/A	#N/A	Progressive Disease	#N/A	#N/A	1	98	1	98	#N/A	#N/A	1	98
429	TCGA-XF-A9SK	BLCA	65	MALE	WHITE	Stage IV	[Not Applicable]	Muscle invasive urothelial carcinoma (pT2 or above)	High Grade	2004	[Not Available]	-24019	Dead	WITH TUMOR	#N/A	486	[Not Available]	Distant Metastasis	Bone	#N/A	382	Stable Disease	#N/A	#N/A	1	486	1	486	#N/A	#N/A	1	382
430	TCGA-XF-A9SL	BLCA	69	MALE	WHITE	Stage IV	[Not Applicable]	Muscle invasive urothelial carcinoma (pT2 or above)	High Grade	2004	[Not Available]	-25460	Dead	TUMOR FREE	#N/A	2020	[Not Available]	#N/A	#N/A	#N/A	#N/A	Complete Remission/Response	#N/A	#N/A	1	2020	0	2020	#N/A	#N/A	0	2020
431	TCGA-XF-A9SM	BLCA	76	MALE	WHITE	Stage III	[Not Applicable]	Muscle invasive urothelial carcinoma (pT2 or above)	High Grade	2004	[Not Available]	-27826	Alive	TUMOR FREE	1048	#N/A	[Not Available]	#N/A	#N/A	#N/A	#N/A	Complete Remission/Response	#N/A	#N/A	0	1048	0	1048	0	1048	0	1048
432	TCGA-XF-A9SP	BLCA	59	MALE	WHITE	Stage III	[Not Applicable]	Muscle invasive urothelial carcinoma (pT2 or above)	High Grade	2004	[Not Available]	-21776	Dead	WITH TUMOR	#N/A	454	[Not Available]	Locoregional (Urothelial tumor event)	Renal Pelvis	#N/A	310	Stable Disease	#N/A	#N/A	1	454	1	454	#N/A	#N/A	1	310
433	TCGA-XF-A9ST	BLCA	68	MALE	WHITE	Stage III	[Not Applicable]	Muscle invasive urothelial carcinoma (pT2 or above)	High Grade	2005	[Not Available]	-25080	Dead	#N/A	#N/A	128	[Not Available]	#N/A	#N/A	#N/A	#N/A	[Unknown]	#N/A	#N/A	1	128	#N/A	128	#N/A	#N/A	0	128
434	TCGA-XF-A9SU	BLCA	74	FEMALE	WHITE	Stage IV	[Not Applicable]	Muscle invasive urothelial carcinoma (pT2 or above)	High Grade	2006	[Not Available]	-27068	Dead	WITH TUMOR	#N/A	182	[Not Available]	Distant Metastasis	Liver	#N/A	103	Progressive Disease	#N/A	#N/A	1	182	1	182	#N/A	#N/A	1	103
435	TCGA-XF-A9SV	BLCA	82	MALE	WHITE	Stage IV	[Not Applicable]	Muscle invasive urothelial carcinoma (pT2 or above)	High Grade	2006	[Not Available]	-30265	Dead	WITH TUMOR	#N/A	388	[Not Available]	Distant Metastasis	Lung	#N/A	237	Progressive Disease	#N/A	#N/A	1	388	1	388	#N/A	#N/A	1	237
436	TCGA-XF-A9SW	BLCA	85	MALE	WHITE	Stage IV	[Not Applicable]	Muscle invasive urothelial carcinoma (pT2 or above)	High Grade	2006	[Not Available]	-31049	Dead	WITH TUMOR	#N/A	362	[Not Available]	#N/A	#N/A	#N/A	#N/A	Partial Remission/Response	#N/A	#N/A	1	362	1	362	#N/A	#N/A	1	362
437	TCGA-XF-A9SX	BLCA	63	FEMALE	WHITE	Stage IV	[Not Applicable]	Muscle invasive urothelial carcinoma (pT2 or above)	High Grade	2006	[Not Available]	-23349	Dead	WITH TUMOR	#N/A	719	[Not Available]	Distant Metastasis	Lung	#N/A	475	Progressive Disease	#N/A	#N/A	1	719	1	719	#N/A	#N/A	1	475
438	TCGA-XF-A9SY	BLCA	60	FEMALE	WHITE	Stage IV	[Not Applicable]	Muscle invasive urothelial carcinoma (pT2 or above)	High Grade	2006	[Not Available]	-22212	Alive	WITH TUMOR	640	#N/A	[Not Available]	Distant Metastasis	Other, specify	Groin	168	Progressive Disease	#N/A	#N/A	0	640	0	640	#N/A	#N/A	1	168
439	TCGA-XF-A9SZ	BLCA	79	MALE	WHITE	Stage IV	[Not Applicable]	Muscle invasive urothelial carcinoma (pT2 or above)	High Grade	2007	[Not Available]	-29100	Dead	WITH TUMOR	#N/A	859	[Not Available]	Distant Metastasis	Lung	#N/A	854	Complete Remission/Response	#N/A	#N/A	1	859	1	859	#N/A	#N/A	1	854
440	TCGA-XF-A9T0	BLCA	68	MALE	WHITE	Stage III	[Not Applicable]	Muscle invasive urothelial carcinoma (pT2 or above)	High Grade	2007	[Not Available]	-25190	Alive	TUMOR FREE	799	#N/A	[Not Available]	#N/A	#N/A	#N/A	#N/A	Complete Remission/Response	#N/A	#N/A	0	799	0	799	0	799	0	799
441	TCGA-XF-A9T2	BLCA	54	MALE	WHITE	Stage III	[Not Applicable]	Muscle invasive urothelial carcinoma (pT2 or above)	High Grade	2007	[Not Available]	-19945	Dead	#N/A	#N/A	575	[Not Available]	#N/A	#N/A	#N/A	#N/A	[Unknown]	#N/A	#N/A	1	575	#N/A	575	#N/A	#N/A	0	575
442	TCGA-XF-A9T3	BLCA	69	FEMALE	WHITE	Stage IV	[Not Applicable]	Muscle invasive urothelial carcinoma (pT2 or above)	High Grade	2008	[Not Available]	-25532	Alive	TUMOR FREE	68	#N/A	[Not Available]	#N/A	#N/A	#N/A	#N/A	[Unknown]	#N/A	#N/A	0	68	0	68	#N/A	#N/A	0	68
443	TCGA-XF-A9T4	BLCA	48	MALE	WHITE	Stage IV	[Not Applicable]	Muscle invasive urothelial carcinoma (pT2 or above)	High Grade	2008	[Not Available]	-17728	Dead	WITH TUMOR	#N/A	495	[Not Available]	Distant Metastasis	Lung	#N/A	182	Partial Remission/Response	#N/A	#N/A	1	495	1	495	#N/A	#N/A	1	182
444	TCGA-XF-A9T5	BLCA	78	FEMALE	WHITE	Stage IV	[Not Applicable]	Muscle invasive urothelial carcinoma (pT2 or above)	High Grade	2008	[Not Available]	-28578	Alive	TUMOR FREE	2027	#N/A	[Not Available]	Locoregional (Urothelial tumor event)	Other, specify	Vagina	664	Complete Remission/Response	#N/A	#N/A	0	2027	0	2027	#N/A	#N/A	1	664
445	TCGA-XF-A9T6	BLCA	88	FEMALE	WHITE	Stage III	[Not Applicable]	Muscle invasive urothelial carcinoma (pT2 or above)	High Grade	2008	[Not Available]	-32207	Alive	#N/A	64	#N/A	[Not Available]	#N/A	#N/A	#N/A	#N/A	[Unknown]	#N/A	#N/A	0	64	0	64	#N/A	#N/A	0	64
446	TCGA-XF-A9T8	BLCA	64	MALE	WHITE	Stage III	[Not Applicable]	Muscle invasive urothelial carcinoma (pT2 or above)	High Grade	2008	[Not Available]	-23403	Dead	#N/A	#N/A	418	[Not Available]	#N/A	#N/A	#N/A	#N/A	[Unknown]	#N/A	#N/A	1	418	#N/A	418	#N/A	#N/A	0	418
447	TCGA-XF-AAME	BLCA	64	FEMALE	WHITE	Stage II	[Not Applicable]	Muscle invasive urothelial carcinoma (pT2 or above)	High Grade	2006	[Not Available]	-23448	Dead	WITH TUMOR	#N/A	2828	[Not Available]	Locoregional (Urothelial tumor event)	Other, specify	Vagina	1651	Progressive Disease	#N/A	#N/A	1	2828	1	2828	#N/A	#N/A	1	1651
448	TCGA-XF-AAMF	BLCA	68	MALE	WHITE	Stage IV	[Not Applicable]	Muscle invasive urothelial carcinoma (pT2 or above)	High Grade	2004	[Not Available]	-25023	Dead	WITH TUMOR	#N/A	329	[Not Available]	Distant Metastasis	Lung	#N/A	157	Stable Disease	#N/A	#N/A	1	329	1	329	#N/A	#N/A	1	157
449	TCGA-XF-AAMG	BLCA	49	MALE	WHITE	Stage III	[Not Applicable]	Muscle invasive urothelial carcinoma (pT2 or above)	High Grade	2004	[Not Available]	-18021	Alive	TUMOR FREE	3364	#N/A	[Not Available]	#N/A	#N/A	#N/A	#N/A	Complete Remission/Response	#N/A	#N/A	0	3364	0	3364	0	3364	0	3364
450	TCGA-XF-AAMH	BLCA	80	MALE	WHITE	Stage IV	[Not Applicable]	Muscle invasive urothelial carcinoma (pT2 or above)	High Grade	2005	[Not Available]	-29547	Dead	WITH TUMOR	#N/A	344	[Not Available]	Distant Metastasis	Other, specify	lumbar spine and right hemipelvis	313	Progressive Disease	#N/A	#N/A	1	344	1	344	#N/A	#N/A	1	313
451	TCGA-XF-AAMJ	BLCA	70	MALE	ASIAN	Stage III	[Not Applicable]	Muscle invasive urothelial carcinoma (pT2 or above)	High Grade	2006	[Not Available]	-25838	Dead	TUMOR FREE	#N/A	1670	[Not Available]	#N/A	#N/A	#N/A	#N/A	Complete Remission/Response	#N/A	#N/A	1	1670	0	1670	0	1670	0	1670
452	TCGA-XF-AAML	BLCA	75	MALE	WHITE	Stage II	[Not Applicable]	Muscle invasive urothelial carcinoma (pT2 or above)	High Grade	2007	[Not Available]	-27422	Dead	TUMOR FREE	#N/A	232	[Not Available]	#N/A	#N/A	#N/A	#N/A	Complete Remission/Response	#N/A	#N/A	1	232	0	232	0	232	0	232
453	TCGA-XF-AAMQ	BLCA	59	FEMALE	WHITE	Stage II	[Not Applicable]	Muscle invasive urothelial carcinoma (pT2 or above)	High Grade	2006	[Not Available]	-21660	Alive	TUMOR FREE	2177	#N/A	[Not Available]	#N/A	#N/A	#N/A	#N/A	Complete Remission/Response	#N/A	#N/A	0	2177	0	2177	0	2177	0	2177
454	TCGA-XF-AAMR	BLCA	48	MALE	WHITE	Stage III	[Not Applicable]	Muscle invasive urothelial carcinoma (pT2 or above)	High Grade	2006	[Not Available]	-17670	Alive	TUMOR FREE	2790	#N/A	[Not Available]	#N/A	#N/A	#N/A	#N/A	Complete Remission/Response	#N/A	#N/A	0	2790	0	2790	0	2790	0	2790
455	TCGA-XF-AAMT	BLCA	75	FEMALE	WHITE	Stage IV	[Not Applicable]	Muscle invasive urothelial carcinoma (pT2 or above)	High Grade	2006	[Not Available]	-27397	Dead	WITH TUMOR	#N/A	90	[Not Available]	#N/A	#N/A	#N/A	#N/A	Partial Remission/Response	#N/A	#N/A	1	90	1	90	#N/A	#N/A	1	90
456	TCGA-XF-AAMW	BLCA	79	FEMALE	WHITE	Stage IV	[Not Applicable]	Muscle invasive urothelial carcinoma (pT2 or above)	High Grade	2006	[Not Available]	-28903	Dead	WITH TUMOR	#N/A	253	[Not Available]	#N/A	#N/A	#N/A	#N/A	Partial Remission/Response	#N/A	#N/A	1	253	1	253	#N/A	#N/A	1	253
457	TCGA-XF-AAMX	BLCA	87	FEMALE	BLACK OR AFRICAN AMERICAN	Stage III	[Not Applicable]	Muscle invasive urothelial carcinoma (pT2 or above)	High Grade	2006	[Not Available]	-31884	Dead	TUMOR FREE	#N/A	206	[Not Available]	#N/A	#N/A	#N/A	#N/A	Complete Remission/Response	#N/A	#N/A	1	206	0	206	0	206	0	206
458	TCGA-XF-AAMY	BLCA	78	MALE	WHITE	Stage III	[Not Applicable]	Muscle invasive urothelial carcinoma (pT2 or above)	High Grade	2006	[Not Available]	-28509	Alive	TUMOR FREE	3011	#N/A	[Not Available]	Distant Metastasis	Lung	#N/A	637	Complete Remission/Response	#N/A	#N/A	0	3011	0	3011	1	637	1	637
459	TCGA-XF-AAMZ	BLCA	81	FEMALE	WHITE	Stage IV	[Not Applicable]	Muscle invasive urothelial carcinoma (pT2 or above)	High Grade	2007	[Not Available]	-29667	Dead	WITH TUMOR	#N/A	1348	[Not Available]	Locoregional (Urothelial tumor event)	Lymph Node Only	#N/A	1344	Partial Remission/Response	#N/A	#N/A	1	1348	1	1348	#N/A	#N/A	1	1344
460	TCGA-XF-AAN0	BLCA	68	MALE	WHITE	Stage IV	[Not Applicable]	Muscle invasive urothelial carcinoma (pT2 or above)	High Grade	2007	[Not Available]	-24877	Dead	WITH TUMOR	#N/A	1718	[Not Available]	Locoregional (Urothelial tumor event)	Other, specify	Scrotum and Perineum	603	Complete Remission/Response	#N/A	#N/A	1	1718	1	1718	#N/A	#N/A	1	603
461	TCGA-XF-AAN1	BLCA	75	FEMALE	[Unknown]	Stage III	[Not Applicable]	Muscle invasive urothelial carcinoma (pT2 or above)	High Grade	2006	[Not Available]	-27687	Dead	WITH TUMOR	#N/A	941	[Not Available]	Locoregional (Urothelial tumor event)	Other, specify	Pelvis and vagina	650	Partial Remission/Response	#N/A	#N/A	1	941	1	941	#N/A	#N/A	1	650
462	TCGA-XF-AAN2	BLCA	73	MALE	WHITE	Stage II	[Not Applicable]	Muscle invasive urothelial carcinoma (pT2 or above)	High Grade	2007	[Not Available]	-26720	Dead	TUMOR FREE	#N/A	1869	[Not Available]	#N/A	#N/A	#N/A	#N/A	Complete Remission/Response	#N/A	#N/A	1	1869	0	1869	0	1869	0	1869
463	TCGA-XF-AAN3	BLCA	76	MALE	WHITE	Stage IV	[Not Applicable]	Muscle invasive urothelial carcinoma (pT2 or above)	High Grade	2007	[Not Available]	-27909	Alive	TUMOR FREE	2625	#N/A	[Not Available]	#N/A	#N/A	#N/A	#N/A	Complete Remission/Response	#N/A	#N/A	0	2625	0	2625	#N/A	#N/A	0	2625
464	TCGA-XF-AAN4	BLCA	77	FEMALE	WHITE	Stage III	[Not Applicable]	Muscle invasive urothelial carcinoma (pT2 or above)	High Grade	2007	[Not Available]	-28302	Dead	TUMOR FREE	#N/A	823	[Not Available]	#N/A	#N/A	#N/A	#N/A	Complete Remission/Response	#N/A	#N/A	1	823	0	823	0	823	0	823
465	TCGA-XF-AAN5	BLCA	61	FEMALE	WHITE	Stage III	[Not Applicable]	Muscle invasive urothelial carcinoma (pT2 or above)	High Grade	2008	[Not Available]	-22411	Alive	TUMOR FREE	2293	#N/A	[Not Available]	#N/A	#N/A	#N/A	#N/A	Complete Remission/Response	#N/A	#N/A	0	2293	0	2293	0	2293	0	2293
466	TCGA-XF-AAN7	BLCA	60	MALE	WHITE	Stage IV	[Not Applicable]	Muscle invasive urothelial carcinoma (pT2 or above)	High Grade	2008	[Not Available]	-21951	Dead	WITH TUMOR	#N/A	565	[Not Available]	Locoregional (Urothelial tumor event)	Bladder	#N/A	321	Complete Remission/Response	#N/A	#N/A	1	565	1	565	#N/A	#N/A	1	321
467	TCGA-XF-AAN8	BLCA	74	FEMALE	WHITE	Stage III	[Not Applicable]	Muscle invasive urothelial carcinoma (pT2 or above)	High Grade	2007	[Not Available]	-27309	Dead	#N/A	#N/A	118	[Not Available]	#N/A	#N/A	#N/A	#N/A	[Unknown]	#N/A	#N/A	1	118	#N/A	118	#N/A	#N/A	0	118
468	TCGA-YC-A89H	BLCA	78	FEMALE	WHITE	Stage II	[Not Applicable]	Muscle invasive urothelial carcinoma (pT2 or above)	High Grade	2013	[Not Available]	-28741	Alive	TUMOR FREE	573	#N/A	[Not Available]	#N/A	#N/A	#N/A	#N/A	Complete Remission/Response	#N/A	#N/A	0	573	0	573	0	573	0	573
469	TCGA-YC-A8S6	BLCA	71	MALE	WHITE	Stage II	[Not Applicable]	Muscle invasive urothelial carcinoma (pT2 or above)	High Grade	2013	[Not Available]	-26130	Alive	TUMOR FREE	293	#N/A	[Not Available]	#N/A	#N/A	#N/A	#N/A	Complete Remission/Response	#N/A	#N/A	0	293	0	293	0	293	0	293
470	TCGA-YC-A9TC	BLCA	71	MALE	WHITE	Stage IV	[Not Applicable]	Muscle invasive urothelial carcinoma (pT2 or above)	High Grade	2013	[Not Available]	-26283	Dead	WITH TUMOR	#N/A	20	[Not Available]	#N/A	#N/A	#N/A	#N/A	Progressive Disease	#N/A	#N/A	1	20	1	20	#N/A	#N/A	1	20
471	TCGA-YF-AA3L	BLCA	47	FEMALE	[Unknown]	Stage II	[Not Applicable]	Muscle invasive urothelial carcinoma (pT2 or above)	High Grade	2013	[Not Available]	-17268	Alive	TUMOR FREE	364	#N/A	[Not Available]	#N/A	#N/A	#N/A	#N/A	Complete Remission/Response	#N/A	#N/A	0	364	0	364	0	364	0	364
472	TCGA-YF-AA3M	BLCA	57	MALE	[Unknown]	Stage II	[Not Applicable]	Muscle invasive urothelial carcinoma (pT2 or above)	High Grade	2013	[Not Available]	-21097	Alive	WITH TUMOR	415	#N/A	[Not Available]	Locoregional (Urothelial tumor event)	Other, specify	Pelvis	381	Complete Remission/Response	#N/A	#N/A	0	415	0	415	1	381	1	381
473	TCGA-ZF-A9R0	BLCA	82	MALE	WHITE	Stage III	[Not Applicable]	Muscle invasive urothelial carcinoma (pT2 or above)	High Grade	2013	[Not Available]	-30222	Dead	WITH TUMOR	#N/A	680	[Not Available]	Locoregional (Urothelial tumor event)	Other, specify	right hemipelvis	559	Progressive Disease	#N/A	#N/A	1	680	1	680	#N/A	#N/A	1	559
474	TCGA-ZF-A9R1	BLCA	81	MALE	WHITE	Stage IV	[Not Applicable]	Muscle invasive urothelial carcinoma (pT2 or above)	High Grade	2013	[Not Available]	-29610	Alive	WITH TUMOR	773	#N/A	[Not Available]	Distant Metastasis	Bone	#N/A	758	Complete Remission/Response	#N/A	#N/A	0	773	0	773	#N/A	#N/A	1	758
475	TCGA-ZF-A9R2	BLCA	75	MALE	WHITE	Stage II	[Not Applicable]	Muscle invasive urothelial carcinoma (pT2 or above)	High Grade	2013	[Not Available]	-27537	Alive	TUMOR FREE	642	#N/A	[Not Available]	#N/A	#N/A	#N/A	#N/A	Complete Remission/Response	#N/A	#N/A	0	642	0	642	0	642	0	642
476	TCGA-ZF-A9R3	BLCA	53	FEMALE	WHITE	Stage II	[Not Applicable]	Muscle invasive urothelial carcinoma (pT2 or above)	High Grade	2012	[Not Available]	-19384	Dead	WITH TUMOR	#N/A	949	[Not Available]	Distant Metastasis	Bone	#N/A	917	Complete Remission/Response	#N/A	#N/A	1	949	1	949	1	917	1	917
477	TCGA-ZF-A9R4	BLCA	83	MALE	WHITE	Stage II	[Not Applicable]	Muscle invasive urothelial carcinoma (pT2 or above)	High Grade	2012	[Not Available]	-30398	Alive	TUMOR FREE	921	#N/A	[Not Available]	#N/A	#N/A	#N/A	#N/A	Complete Remission/Response	#N/A	#N/A	0	921	0	921	0	921	0	921
478	TCGA-ZF-A9R5	BLCA	59	MALE	WHITE	Stage III	[Not Applicable]	Muscle invasive urothelial carcinoma (pT2 or above)	High Grade	2011	[Not Available]	-21811	Alive	TUMOR FREE	1090	#N/A	[Not Available]	#N/A	#N/A	#N/A	#N/A	Complete Remission/Response	#N/A	#N/A	0	1090	0	1090	0	1090	0	1090
479	TCGA-ZF-A9R7	BLCA	76	FEMALE	WHITE	Stage II	[Not Applicable]	Muscle invasive urothelial carcinoma (pT2 or above)	High Grade	2011	[Not Available]	-28063	Alive	TUMOR FREE	665	#N/A	[Not Available]	#N/A	#N/A	#N/A	#N/A	Complete Remission/Response	#N/A	#N/A	0	665	0	665	0	665	0	665
480	TCGA-ZF-A9R9	BLCA	58	MALE	WHITE	Stage IV	[Not Applicable]	Muscle invasive urothelial carcinoma (pT2 or above)	High Grade	2010	[Not Available]	-21491	Dead	WITH TUMOR	#N/A	864	[Not Available]	Distant Metastasis	Other, specify	penis	629	Complete Remission/Response	#N/A	#N/A	1	864	1	864	#N/A	#N/A	1	629
481	TCGA-ZF-A9RC	BLCA	77	MALE	WHITE	Stage III	[Not Applicable]	Muscle invasive urothelial carcinoma (pT2 or above)	High Grade	2007	[Not Available]	-28275	Alive	TUMOR FREE	2868	#N/A	[Not Available]	#N/A	#N/A	#N/A	#N/A	Complete Remission/Response	#N/A	#N/A	0	2868	0	2868	0	2868	0	2868
482	TCGA-ZF-A9RD	BLCA	75	FEMALE	WHITE	Stage IV	[Not Applicable]	Muscle invasive urothelial carcinoma (pT2 or above)	High Grade	2008	[Not Available]	-27496	Dead	#N/A	#N/A	408	[Not Available]	#N/A	#N/A	#N/A	#N/A	[Unknown]	#N/A	#N/A	1	408	#N/A	408	#N/A	#N/A	0	408
483	TCGA-ZF-A9RE	BLCA	78	FEMALE	WHITE	Stage II	[Not Applicable]	Muscle invasive urothelial carcinoma (pT2 or above)	High Grade	2010	[Not Available]	-28622	Dead	WITH TUMOR	#N/A	106	[Not Available]	#N/A	#N/A	#N/A	#N/A	Progressive Disease	#N/A	#N/A	1	106	1	106	#N/A	#N/A	1	106
484	TCGA-ZF-A9RF	BLCA	74	MALE	WHITE	Stage II	[Not Applicable]	Muscle invasive urothelial carcinoma (pT2 or above)	High Grade	2009	[Not Available]	-27281	Alive	TUMOR FREE	1949	#N/A	[Not Available]	Locoregional (Urothelial tumor event)	Bladder	#N/A	1565	Complete Remission/Response	#N/A	#N/A	0	1949	0	1949	1	1565	1	1565
485	TCGA-ZF-A9RG	BLCA	70	FEMALE	WHITE	Stage III	[Not Applicable]	Muscle invasive urothelial carcinoma (pT2 or above)	High Grade	2010	[Not Available]	-25656	Alive	WITH TUMOR	1786	#N/A	[Not Available]	Distant Metastasis	Other, specify	neck lymph node	440	Complete Remission/Response	#N/A	#N/A	0	1786	0	1786	1	440	1	440
486	TCGA-ZF-A9RL	BLCA	61	MALE	WHITE	Stage II	[Not Applicable]	Muscle invasive urothelial carcinoma (pT2 or above)	High Grade	2007	[Not Available]	-22480	Alive	TUMOR FREE	2703	#N/A	[Not Available]	Locoregional (Urothelial tumor event)	Bladder	#N/A	1064	Complete Remission/Response	#N/A	#N/A	0	2703	0	2703	1	1064	1	1064
487	TCGA-ZF-A9RM	BLCA	70	MALE	WHITE	Stage II	[Not Applicable]	Muscle invasive urothelial carcinoma (pT2 or above)	High Grade	2010	[Not Available]	-25642	Alive	TUMOR FREE	1455	#N/A	[Not Available]	#N/A	#N/A	#N/A	#N/A	Complete Remission/Response	#N/A	#N/A	0	1455	0	1455	0	1455	0	1455
488	TCGA-ZF-A9RN	BLCA	67	FEMALE	WHITE	Stage III	[Not Applicable]	Muscle invasive urothelial carcinoma (pT2 or above)	High Grade	2010	[Not Available]	-24795	Dead	WITH TUMOR	#N/A	615	[Not Available]	Distant Metastasis	Lung	#N/A	516	Partial Remission/Response	#N/A	#N/A	1	615	1	615	#N/A	#N/A	1	516
489	TCGA-ZF-AA4N	BLCA	74	MALE	WHITE	Stage II	[Not Applicable]	[Not Available]	High Grade	2011	[Not Available]	-27056	Dead	WITH TUMOR	#N/A	88	[Not Available]	#N/A	#N/A	#N/A	#N/A	Progressive Disease	#N/A	#N/A	1	88	1	88	#N/A	#N/A	1	88
490	TCGA-ZF-AA4R	BLCA	67	MALE	WHITE	Stage IV	[Not Applicable]	Muscle invasive urothelial carcinoma (pT2 or above)	High Grade	2008	[Not Available]	-24537	Dead	WITH TUMOR	#N/A	1036	[Not Available]	Locoregional (Urothelial tumor event)	Lymph Node Only	#N/A	750	[Unknown]	#N/A	#N/A	1	1036	1	1036	#N/A	#N/A	1	750
491	TCGA-ZF-AA4T	BLCA	65	MALE	WHITE	Stage IV	[Not Applicable]	Muscle invasive urothelial carcinoma (pT2 or above)	High Grade	2008	[Not Available]	-23974	Dead	WITH TUMOR	#N/A	599	[Not Available]	Distant Metastasis	Lung	#N/A	511	[Unknown]	#N/A	#N/A	1	599	1	599	#N/A	#N/A	1	511
492	TCGA-ZF-AA4U	BLCA	70	MALE	WHITE	Stage III	[Not Applicable]	Muscle invasive urothelial carcinoma (pT2 or above)	High Grade	2008	[Not Available]	-25682	Dead	WITH TUMOR	#N/A	262	[Not Available]	Distant Metastasis	Bone	#N/A	199	Progressive Disease	#N/A	#N/A	1	262	1	262	#N/A	#N/A	1	199
493	TCGA-ZF-AA4V	BLCA	66	MALE	WHITE	Stage III	[Not Applicable]	Muscle invasive urothelial carcinoma (pT2 or above)	High Grade	2008	[Not Available]	-24448	Alive	TUMOR FREE	1806	#N/A	[Not Available]	#N/A	#N/A	#N/A	#N/A	Complete Remission/Response	#N/A	#N/A	0	1806	0	1806	0	1806	0	1806
494	TCGA-ZF-AA4W	BLCA	56	MALE	WHITE	Stage III	[Not Applicable]	Muscle invasive urothelial carcinoma (pT2 or above)	High Grade	2009	[Not Available]	-20611	Alive	#N/A	1830	#N/A	[Not Available]	Locoregional (Urothelial tumor event)	Other, specify	penile urethra	1679	Complete Remission/Response	#N/A	#N/A	0	1830	0	1830	1	1679	1	1679
495	TCGA-ZF-AA4X	BLCA	56	MALE	WHITE	Stage II	[Not Applicable]	Muscle invasive urothelial carcinoma (pT2 or above)	High Grade	2009	[Not Available]	-20579	Alive	WITH TUMOR	2044	#N/A	[Not Available]	Locoregional (Urothelial tumor event)	Bladder	#N/A	1665	Complete Remission/Response	#N/A	#N/A	0	2044	0	2044	1	1665	1	1665
496	TCGA-ZF-AA51	BLCA	69	FEMALE	WHITE	Stage II	[Not Applicable]	Muscle invasive urothelial carcinoma (pT2 or above)	High Grade	2009	[Not Available]	-25484	Alive	TUMOR FREE	1714	#N/A	[Not Available]	#N/A	#N/A	#N/A	#N/A	Complete Remission/Response	#N/A	#N/A	0	1714	0	1714	0	1714	0	1714
497	TCGA-ZF-AA52	BLCA	70	MALE	WHITE	Stage III	[Not Applicable]	Muscle invasive urothelial carcinoma (pT2 or above)	High Grade	2009	[Not Available]	-25579	Dead	#N/A	#N/A	1077	[Not Available]	#N/A	#N/A	#N/A	#N/A	Partial Remission/Response	#N/A	#N/A	1	1077	#N/A	1077	#N/A	#N/A	0	1077
498	TCGA-ZF-AA53	BLCA	60	MALE	WHITE	Stage II	[Not Applicable]	Muscle invasive urothelial carcinoma (pT2 or above)	High Grade	2010	[Not Available]	-22035	Alive	TUMOR FREE	1761	#N/A	[Not Available]	#N/A	#N/A	#N/A	#N/A	Complete Remission/Response	#N/A	#N/A	0	1761	0	1761	0	1761	0	1761
499	TCGA-ZF-AA54	BLCA	71	MALE	WHITE	Stage III	[Not Applicable]	Muscle invasive urothelial carcinoma (pT2 or above)	High Grade	2009	[Not Available]	-26128	Dead	#N/A	#N/A	590	[Not Available]	#N/A	#N/A	#N/A	#N/A	[Unknown]	#N/A	#N/A	1	590	#N/A	590	#N/A	#N/A	0	590
500	TCGA-ZF-AA56	BLCA	79	FEMALE	WHITE	Stage III	[Not Applicable]	Muscle invasive urothelial carcinoma (pT2 or above)	High Grade	2010	[Not Available]	-28937	Dead	WITH TUMOR	#N/A	259	[Not Available]	Distant Metastasis	Liver	#N/A	248	Progressive Disease	#N/A	#N/A	1	259	1	259	#N/A	#N/A	1	248
501	TCGA-ZF-AA58	BLCA	61	FEMALE	WHITE	Stage IV	[Not Applicable]	Muscle invasive urothelial carcinoma (pT2 or above)	High Grade	2010	[Not Available]	-22549	Alive	TUMOR FREE	1649	#N/A	[Not Available]	#N/A	#N/A	#N/A	#N/A	Complete Remission/Response	#N/A	#N/A	0	1649	0	1649	#N/A	#N/A	0	1649
502	TCGA-ZF-AA5H	BLCA	60	FEMALE	WHITE	Stage IV	[Not Applicable]	Muscle invasive urothelial carcinoma (pT2 or above)	High Grade	2012	[Not Available]	-22122	Alive	WITH TUMOR	897	#N/A	[Not Available]	Locoregional (Urothelial tumor event)	Other, specify	peritoneum	177	Stable Disease	#N/A	#N/A	0	897	0	897	#N/A	#N/A	1	177
503	TCGA-ZF-AA5N	BLCA	62	FEMALE	WHITE	Stage IV	[Not Applicable]	Muscle invasive urothelial carcinoma (pT2 or above)	High Grade	2013	[Not Available]	-22741	Dead	WITH TUMOR	#N/A	168	[Not Available]	#N/A	#N/A	#N/A	#N/A	Progressive Disease	#N/A	#N/A	1	168	1	168	#N/A	#N/A	1	168
504	TCGA-ZF-AA5P	BLCA	65	MALE	WHITE	Stage IV	[Not Applicable]	Muscle invasive urothelial carcinoma (pT2 or above)	High Grade	2013	[Not Available]	-23971	Alive	TUMOR FREE	372	#N/A	[Not Available]	#N/A	#N/A	#N/A	#N/A	Complete Remission/Response	#N/A	#N/A	0	372	0	372	#N/A	#N/A	0	372
505	TCGA-3C-AAAU	BRCA	55	FEMALE	WHITE	Stage X	[Not Applicable]	Infiltrating Lobular Carcinoma	[Not Available]	2004	Pre (<6 months since LMP AND no prior bilateral ovariectomy AND not on estrogen replacement)	-20211	Alive	WITH TUMOR	4047	#N/A	[Not Available]	Distant Metastasis	Lung	#N/A	1808	[Not Available]	Negative	#N/A	0	4047	0	4047	1	1808	1	1808
506	TCGA-3C-AALI	BRCA	50	FEMALE	BLACK OR AFRICAN AMERICAN	Stage IIB	[Not Applicable]	Infiltrating Ductal Carcinoma	[Not Available]	2003	Post (prior bilateral ovariectomy OR >12 mo since LMP with no prior hysterectomy)	-18538	Alive	TUMOR FREE	4005	#N/A	[Not Available]	#N/A	#N/A	#N/A	#N/A	[Not Available]	Negative	#N/A	0	4005	0	4005	0	4005	0	4005
507	TCGA-3C-AALJ	BRCA	62	FEMALE	BLACK OR AFRICAN AMERICAN	Stage IIB	[Not Applicable]	Infiltrating Ductal Carcinoma	[Not Available]	2011	Post (prior bilateral ovariectomy OR >12 mo since LMP with no prior hysterectomy)	-22848	Alive	TUMOR FREE	1474	#N/A	[Not Available]	#N/A	#N/A	#N/A	#N/A	[Not Available]	Negative	#N/A	0	1474	0	1474	0	1474	0	1474
508	TCGA-3C-AALK	BRCA	52	FEMALE	BLACK OR AFRICAN AMERICAN	Stage IA	[Not Applicable]	Infiltrating Ductal Carcinoma	[Not Available]	2011	[Unknown]	-19074	Alive	TUMOR FREE	1448	#N/A	[Not Available]	#N/A	#N/A	#N/A	#N/A	[Not Available]	Close	#N/A	0	1448	0	1448	#N/A	#N/A	0	1448
509	TCGA-4H-AAAK	BRCA	50	FEMALE	WHITE	Stage IIIA	[Not Applicable]	Infiltrating Lobular Carcinoma	[Not Available]	2013	Post (prior bilateral ovariectomy OR >12 mo since LMP with no prior hysterectomy)	-18371	Alive	TUMOR FREE	348	#N/A	[Not Available]	#N/A	#N/A	#N/A	#N/A	[Not Available]	Negative	#N/A	0	348	0	348	0	348	0	348
510	TCGA-5L-AAT0	BRCA	42	FEMALE	WHITE	Stage IIA	[Not Applicable]	Infiltrating Lobular Carcinoma	[Not Available]	2010	Post (prior bilateral ovariectomy OR >12 mo since LMP with no prior hysterectomy)	-15393	Alive	TUMOR FREE	1477	#N/A	[Not Available]	#N/A	#N/A	#N/A	#N/A	[Not Available]	Positive	#N/A	0	1477	0	1477	#N/A	#N/A	0	1477
511	TCGA-5L-AAT1	BRCA	63	FEMALE	WHITE	Stage IV	[Not Applicable]	Infiltrating Lobular Carcinoma	[Not Available]	2010	Post (prior bilateral ovariectomy OR >12 mo since LMP with no prior hysterectomy)	-23225	Alive	WITH TUMOR	1471	#N/A	[Not Available]	#N/A	#N/A	#N/A	#N/A	[Not Available]	Negative	#N/A	0	1471	0	1471	#N/A	#N/A	0	1471
512	TCGA-5T-A9QA	BRCA	52	FEMALE	BLACK OR AFRICAN AMERICAN	Stage IIA	[Not Applicable]	Other, specify	[Not Available]	2013	[Unknown]	-19031	Alive	#N/A	303	#N/A	[Not Available]	#N/A	#N/A	#N/A	#N/A	[Not Available]	[Unknown]	#N/A	0	303	0	303	#N/A	#N/A	0	303
513	TCGA-A1-A0SB	BRCA	70	FEMALE	WHITE	Stage I	[Not Applicable]	Other, specify	[Not Available]	2008	Post (prior bilateral ovariectomy OR >12 mo since LMP with no prior hysterectomy)	-25833	Alive	TUMOR FREE	259	#N/A	[Not Available]	#N/A	#N/A	#N/A	#N/A	[Not Available]	Negative	#N/A	0	259	0	259	0	259	0	259
514	TCGA-A1-A0SD	BRCA	59	FEMALE	WHITE	Stage IIA	[Not Applicable]	Infiltrating Ductal Carcinoma	[Not Available]	2005	[Not Available]	-21793	Alive	#N/A	437	#N/A	[Not Available]	#N/A	#N/A	#N/A	#N/A	[Not Available]	Negative	#N/A	0	437	0	437	0	437	0	437
515	TCGA-A1-A0SE	BRCA	56	FEMALE	WHITE	Stage I	[Not Applicable]	Mixed Histology (please specify)	[Not Available]	2005	Pre (<6 months since LMP AND no prior bilateral ovariectomy AND not on estrogen replacement)	-20717	Alive	TUMOR FREE	1321	#N/A	[Not Available]	#N/A	#N/A	#N/A	#N/A	[Not Available]	Negative	#N/A	0	1321	0	1321	0	1321	0	1321
516	TCGA-A1-A0SF	BRCA	54	FEMALE	WHITE	Stage IIA	[Not Applicable]	Infiltrating Ductal Carcinoma	[Not Available]	2006	Pre (<6 months since LMP AND no prior bilateral ovariectomy AND not on estrogen replacement)	-19731	Alive	TUMOR FREE	1463	#N/A	[Not Available]	#N/A	#N/A	#N/A	#N/A	[Not Available]	Negative	#N/A	0	1463	0	1463	0	1463	0	1463
517	TCGA-A1-A0SG	BRCA	61	FEMALE	WHITE	Stage IIB	[Not Applicable]	Other, specify	[Not Available]	2006	Post (prior bilateral ovariectomy OR >12 mo since LMP with no prior hysterectomy)	-22380	Alive	#N/A	434	#N/A	[Not Available]	#N/A	#N/A	#N/A	#N/A	[Not Available]	Negative	#N/A	0	434	0	434	0	434	0	434
518	TCGA-A1-A0SH	BRCA	39	FEMALE	WHITE	Stage IIA	[Not Applicable]	Infiltrating Ductal Carcinoma	[Not Available]	2006	Pre (<6 months since LMP AND no prior bilateral ovariectomy AND not on estrogen replacement)	-14595	Alive	TUMOR FREE	1437	#N/A	[Not Available]	#N/A	#N/A	#N/A	#N/A	[Not Available]	Negative	#N/A	0	1437	0	1437	0	1437	0	1437
519	TCGA-A1-A0SI	BRCA	52	FEMALE	WHITE	Stage IIB	[Not Applicable]	Infiltrating Ductal Carcinoma	[Not Available]	2007	[Not Available]	-19250	Alive	TUMOR FREE	635	#N/A	[Not Available]	#N/A	#N/A	#N/A	#N/A	[Not Available]	Negative	#N/A	0	635	0	635	0	635	0	635
520	TCGA-A1-A0SJ	BRCA	39	FEMALE	BLACK OR AFRICAN AMERICAN	Stage IIIA	[Not Applicable]	Infiltrating Ductal Carcinoma	[Not Available]	2006	[Not Available]	-14383	Alive	TUMOR FREE	416	#N/A	[Not Available]	#N/A	#N/A	#N/A	#N/A	[Not Available]	Negative	#N/A	0	416	0	416	0	416	0	416
521	TCGA-A1-A0SK	BRCA	54	FEMALE	ASIAN	Stage IIA	[Not Applicable]	Other, specify	[Not Available]	2007	Indeterminate (neither Pre or Postmenopausal)	-20048	Dead	WITH TUMOR	#N/A	967	[Not Available]	#N/A	#N/A	#N/A	#N/A	[Not Available]	Negative	#N/A	1	967	1	967	#N/A	#N/A	1	967
522	TCGA-A1-A0SM	BRCA	77	MALE	WHITE	Stage IIA	[Not Applicable]	Infiltrating Ductal Carcinoma	[Not Available]	2007	[Not Available]	-28198	Alive	TUMOR FREE	242	#N/A	[Not Available]	#N/A	#N/A	#N/A	#N/A	[Not Available]	Negative	#N/A	0	242	0	242	0	242	0	242
523	TCGA-A1-A0SN	BRCA	50	FEMALE	WHITE	Stage IIA	[Not Applicable]	Infiltrating Ductal Carcinoma	[Not Available]	2007	Post (prior bilateral ovariectomy OR >12 mo since LMP with no prior hysterectomy)	-18401	Alive	TUMOR FREE	1196	#N/A	[Not Available]	#N/A	#N/A	#N/A	#N/A	[Not Available]	Negative	#N/A	0	1196	0	1196	0	1196	0	1196
524	TCGA-A1-A0SO	BRCA	67	FEMALE	WHITE	Stage IIB	[Not Applicable]	Infiltrating Ductal Carcinoma	[Not Available]	2007	Post (prior bilateral ovariectomy OR >12 mo since LMP with no prior hysterectomy)	-24826	Alive	TUMOR FREE	852	#N/A	[Not Available]	#N/A	#N/A	#N/A	#N/A	[Not Available]	Negative	#N/A	0	852	0	852	0	852	0	852
525	TCGA-A1-A0SP	BRCA	40	FEMALE	[Not Available]	Stage IIA	[Not Applicable]	Infiltrating Ductal Carcinoma	[Not Available]	2007	[Not Available]	-14954	Alive	TUMOR FREE	584	#N/A	[Not Available]	#N/A	#N/A	#N/A	#N/A	[Not Available]	Negative	#N/A	0	584	0	584	0	584	0	584
526	TCGA-A1-A0SQ	BRCA	45	FEMALE	WHITE	Stage IIB	[Not Applicable]	Infiltrating Ductal Carcinoma	[Not Available]	2007	Pre (<6 months since LMP AND no prior bilateral ovariectomy AND not on estrogen replacement)	-16458	Alive	TUMOR FREE	554	#N/A	[Not Available]	#N/A	#N/A	#N/A	#N/A	[Not Available]	Negative	#N/A	0	554	0	554	0	554	0	554
527	TCGA-A2-A04N	BRCA	66	FEMALE	WHITE	Stage IA	[Not Applicable]	Infiltrating Ductal Carcinoma	[Not Available]	2002	Post (prior bilateral ovariectomy OR >12 mo since LMP with no prior hysterectomy)	-24155	Alive	TUMOR FREE	4354	#N/A	[Not Available]	#N/A	#N/A	#N/A	#N/A	[Not Available]	Negative	#N/A	0	4354	0	4354	0	4354	0	4354
528	TCGA-A2-A04P	BRCA	36	FEMALE	BLACK OR AFRICAN AMERICAN	Stage IIIC	[Not Applicable]	Infiltrating Ductal Carcinoma	[Not Available]	2003	Pre (<6 months since LMP AND no prior bilateral ovariectomy AND not on estrogen replacement)	-13238	Dead	WITH TUMOR	#N/A	548	[Not Available]	Distant Metastasis	Bone	#N/A	102	[Not Available]	Positive	#N/A	1	548	1	548	#N/A	#N/A	1	102
529	TCGA-A2-A04Q	BRCA	48	FEMALE	WHITE	Stage IA	[Not Applicable]	Infiltrating Ductal Carcinoma	[Not Available]	2004	Post (prior bilateral ovariectomy OR >12 mo since LMP with no prior hysterectomy)	-17660	Alive	TUMOR FREE	2385	#N/A	[Not Available]	#N/A	#N/A	#N/A	#N/A	[Not Available]	Negative	#N/A	0	2385	0	2385	0	2385	0	2385
530	TCGA-A2-A04R	BRCA	36	FEMALE	BLACK OR AFRICAN AMERICAN	Stage IA	[Not Applicable]	Infiltrating Ductal Carcinoma	[Not Available]	2004	Pre (<6 months since LMP AND no prior bilateral ovariectomy AND not on estrogen replacement)	-13483	Alive	TUMOR FREE	3709	#N/A	[Not Available]	#N/A	#N/A	#N/A	#N/A	[Not Available]	Negative	#N/A	0	3709	0	3709	0	3709	0	3709
531	TCGA-A2-A04T	BRCA	62	FEMALE	WHITE	Stage IIA	[Not Applicable]	Infiltrating Ductal Carcinoma	[Not Available]	2004	Post (prior bilateral ovariectomy OR >12 mo since LMP with no prior hysterectomy)	-22707	Alive	TUMOR FREE	2246	#N/A	[Not Available]	#N/A	#N/A	#N/A	#N/A	[Not Available]	Negative	#N/A	0	2246	0	2246	0	2246	0	2246
532	TCGA-A2-A04U	BRCA	47	FEMALE	WHITE	Stage IIA	[Not Applicable]	Infiltrating Ductal Carcinoma	[Not Available]	2004	Peri (6-12 months since last menstrual period)	-17474	Alive	TUMOR FREE	2654	#N/A	[Not Available]	#N/A	#N/A	#N/A	#N/A	[Not Available]	Negative	#N/A	0	2654	0	2654	0	2654	0	2654
533	TCGA-A2-A04V	BRCA	39	FEMALE	WHITE	Stage IIA	[Not Applicable]	Infiltrating Ductal Carcinoma	[Not Available]	2005	Pre (<6 months since LMP AND no prior bilateral ovariectomy AND not on estrogen replacement)	-14250	Dead	WITH TUMOR	#N/A	1920	[Not Available]	#N/A	#N/A	#N/A	1470	[Not Available]	Negative	#N/A	1	1920	1	1920	1	1470	1	1470
534	TCGA-A2-A04W	BRCA	50	FEMALE	WHITE	Stage IIB	[Not Applicable]	Other, specify	[Not Available]	2005	Pre (<6 months since LMP AND no prior bilateral ovariectomy AND not on estrogen replacement)	-18345	Alive	TUMOR FREE	3102	#N/A	[Not Available]	#N/A	#N/A	#N/A	#N/A	[Not Available]	Negative	#N/A	0	3102	0	3102	0	3102	0	3102
535	TCGA-A2-A04X	BRCA	34	FEMALE	WHITE	Stage IIA	[Not Applicable]	Infiltrating Ductal Carcinoma	[Not Available]	2006	Pre (<6 months since LMP AND no prior bilateral ovariectomy AND not on estrogen replacement)	-12642	Alive	TUMOR FREE	1686	#N/A	[Not Available]	#N/A	#N/A	#N/A	#N/A	[Not Available]	Negative	#N/A	0	1686	0	1686	0	1686	0	1686
536	TCGA-A2-A04Y	BRCA	53	FEMALE	WHITE	Stage IIB	[Not Applicable]	Infiltrating Ductal Carcinoma	[Not Available]	2008	Post (prior bilateral ovariectomy OR >12 mo since LMP with no prior hysterectomy)	-19533	Alive	TUMOR FREE	1099	#N/A	[Not Available]	#N/A	#N/A	#N/A	#N/A	[Not Available]	Negative	#N/A	0	1099	0	1099	0	1099	0	1099
537	TCGA-A2-A0CK	BRCA	60	FEMALE	WHITE	Stage IIIA	[Not Applicable]	Infiltrating Lobular Carcinoma	[Not Available]	2001	Post (prior bilateral ovariectomy OR >12 mo since LMP with no prior hysterectomy)	-22094	Alive	TUMOR FREE	4159	#N/A	[Not Available]	New Primary Tumor	Other, specify	LEFT BREAST	1364	[Not Available]	Negative	#N/A	0	4159	0	4159	1	1364	1	1364
538	TCGA-A2-A0CL	BRCA	37	FEMALE	BLACK OR AFRICAN AMERICAN	Stage IIIA	[Not Applicable]	Infiltrating Ductal Carcinoma	[Not Available]	2006	Pre (<6 months since LMP AND no prior bilateral ovariectomy AND not on estrogen replacement)	-13556	Alive	TUMOR FREE	3015	#N/A	[Not Available]	#N/A	#N/A	#N/A	#N/A	[Not Available]	Positive	#N/A	0	3015	0	3015	#N/A	#N/A	0	3015
539	TCGA-A2-A0CM	BRCA	40	FEMALE	BLACK OR AFRICAN AMERICAN	Stage IIA	[Not Applicable]	Infiltrating Ductal Carcinoma	[Not Available]	2003	Pre (<6 months since LMP AND no prior bilateral ovariectomy AND not on estrogen replacement)	-14969	Dead	WITH TUMOR	#N/A	754	[Not Available]	#N/A	#N/A	#N/A	382	[Not Available]	Negative	#N/A	1	754	1	754	1	382	1	382
540	TCGA-A2-A0CO	BRCA	85	FEMALE	WHITE	Stage IIB	[Not Applicable]	Infiltrating Lobular Carcinoma	[Not Available]	2002	Post (prior bilateral ovariectomy OR >12 mo since LMP with no prior hysterectomy)	-31404	Dead	TUMOR FREE	#N/A	3492	[Not Available]	#N/A	#N/A	#N/A	#N/A	[Not Available]	Positive	#N/A	1	3492	0	3492	#N/A	#N/A	0	3492
541	TCGA-A2-A0CP	BRCA	60	FEMALE	WHITE	Stage IA	[Not Applicable]	Infiltrating Ductal Carcinoma	[Not Available]	2003	Post (prior bilateral ovariectomy OR >12 mo since LMP with no prior hysterectomy)	-22133	Alive	TUMOR FREE	2813	#N/A	[Not Available]	#N/A	#N/A	#N/A	#N/A	[Not Available]	Negative	#N/A	0	2813	0	2813	0	2813	0	2813
542	TCGA-A2-A0CQ	BRCA	62	FEMALE	BLACK OR AFRICAN AMERICAN	Stage IA	[Not Applicable]	Infiltrating Ductal Carcinoma	[Not Available]	2003	Post (prior bilateral ovariectomy OR >12 mo since LMP with no prior hysterectomy)	-22810	Alive	TUMOR FREE	2695	#N/A	[Not Available]	#N/A	#N/A	#N/A	#N/A	[Not Available]	Negative	#N/A	0	2695	0	2695	0	2695	0	2695
543	TCGA-A2-A0CR	BRCA	54	FEMALE	ASIAN	Stage IIB	[Not Applicable]	Infiltrating Lobular Carcinoma	[Not Available]	2004	Post (prior bilateral ovariectomy OR >12 mo since LMP with no prior hysterectomy)	-20075	Alive	TUMOR FREE	3283	#N/A	[Not Available]	#N/A	#N/A	#N/A	#N/A	[Not Available]	Close	#N/A	0	3283	0	3283	#N/A	#N/A	0	3283
544	TCGA-A2-A0CS	BRCA	73	FEMALE	WHITE	Stage IV	[Not Applicable]	Infiltrating Ductal Carcinoma	[Not Available]	2004	Post (prior bilateral ovariectomy OR >12 mo since LMP with no prior hysterectomy)	-26817	Dead	TUMOR FREE	#N/A	2348	[Not Available]	#N/A	#N/A	#N/A	#N/A	[Not Available]	Positive	#N/A	1	2348	0	2348	#N/A	#N/A	0	2348
545	TCGA-A2-A0CT	BRCA	71	FEMALE	WHITE	Stage IIA	[Not Applicable]	Infiltrating Ductal Carcinoma	[Not Available]	2005	Post (prior bilateral ovariectomy OR >12 mo since LMP with no prior hysterectomy)	-25959	Alive	TUMOR FREE	2289	#N/A	[Not Available]	#N/A	#N/A	#N/A	#N/A	[Not Available]	Negative	#N/A	0	2289	0	2289	0	2289	0	2289
546	TCGA-A2-A0CU	BRCA	73	FEMALE	WHITE	Stage IIA	[Not Applicable]	Infiltrating Ductal Carcinoma	[Not Available]	2005	Post (prior bilateral ovariectomy OR >12 mo since LMP with no prior hysterectomy)	-26823	Dead	TUMOR FREE	#N/A	158	[Not Available]	#N/A	#N/A	#N/A	#N/A	[Not Available]	Close	#N/A	1	158	0	158	#N/A	#N/A	0	158
547	TCGA-A2-A0CV	BRCA	41	FEMALE	ASIAN	Stage IIB	[Not Applicable]	Infiltrating Ductal Carcinoma	[Not Available]	2005	Post (prior bilateral ovariectomy OR >12 mo since LMP with no prior hysterectomy)	-15289	Alive	TUMOR FREE	3011	#N/A	[Not Available]	#N/A	#N/A	#N/A	#N/A	[Not Available]	Negative	#N/A	0	3011	0	3011	0	3011	0	3011
548	TCGA-A2-A0CW	BRCA	67	FEMALE	WHITE	Stage IIB	[Not Applicable]	Infiltrating Ductal Carcinoma	[Not Available]	2006	Post (prior bilateral ovariectomy OR >12 mo since LMP with no prior hysterectomy)	-24541	Alive	TUMOR FREE	3283	#N/A	[Not Available]	#N/A	#N/A	#N/A	#N/A	[Not Available]	Negative	#N/A	0	3283	0	3283	0	3283	0	3283
549	TCGA-A2-A0CX	BRCA	52	FEMALE	WHITE	Stage IIA	[Not Applicable]	Infiltrating Ductal Carcinoma	[Not Available]	2006	Pre (<6 months since LMP AND no prior bilateral ovariectomy AND not on estrogen replacement)	-19152	Alive	TUMOR FREE	1728	#N/A	[Not Available]	#N/A	#N/A	#N/A	#N/A	[Not Available]	Negative	#N/A	0	1728	0	1728	0	1728	0	1728
550	TCGA-A2-A0CY	BRCA	63	FEMALE	WHITE	Stage IIB	[Not Applicable]	Infiltrating Ductal Carcinoma	[Not Available]	2006	Post (prior bilateral ovariectomy OR >12 mo since LMP with no prior hysterectomy)	-23229	Alive	TUMOR FREE	1673	#N/A	[Not Available]	#N/A	#N/A	#N/A	#N/A	[Not Available]	Negative	#N/A	0	1673	0	1673	0	1673	0	1673
551	TCGA-A2-A0CZ	BRCA	46	FEMALE	WHITE	Stage IIA	[Not Applicable]	Infiltrating Ductal Carcinoma	[Not Available]	2007	Peri (6-12 months since last menstrual period)	-17026	Alive	TUMOR FREE	1616	#N/A	[Not Available]	#N/A	#N/A	#N/A	#N/A	[Not Available]	Positive	#N/A	0	1616	0	1616	#N/A	#N/A	0	1616
552	TCGA-A2-A0D0	BRCA	60	FEMALE	BLACK OR AFRICAN AMERICAN	Stage IIA	[Not Applicable]	Infiltrating Ductal Carcinoma	[Not Available]	2008	Post (prior bilateral ovariectomy OR >12 mo since LMP with no prior hysterectomy)	-22115	Alive	TUMOR FREE	2048	#N/A	[Not Available]	#N/A	#N/A	#N/A	#N/A	[Not Available]	Negative	#N/A	0	2048	0	2048	0	2048	0	2048
553	TCGA-A2-A0D1	BRCA	76	FEMALE	WHITE	Stage IIA	[Not Applicable]	Infiltrating Ductal Carcinoma	[Not Available]	2008	Post (prior bilateral ovariectomy OR >12 mo since LMP with no prior hysterectomy)	-28084	Alive	TUMOR FREE	1051	#N/A	[Not Available]	#N/A	#N/A	#N/A	#N/A	[Not Available]	Negative	#N/A	0	1051	0	1051	0	1051	0	1051
554	TCGA-A2-A0D2	BRCA	45	FEMALE	WHITE	Stage IIA	[Not Applicable]	Infiltrating Ductal Carcinoma	[Not Available]	2008	Pre (<6 months since LMP AND no prior bilateral ovariectomy AND not on estrogen replacement)	-16623	Alive	TUMOR FREE	1027	#N/A	[Not Available]	#N/A	#N/A	#N/A	#N/A	[Not Available]	Negative	#N/A	0	1027	0	1027	0	1027	0	1027
555	TCGA-A2-A0D3	BRCA	42	FEMALE	WHITE	Stage IA	[Not Applicable]	Infiltrating Ductal Carcinoma	[Not Available]	2008	Post (prior bilateral ovariectomy OR >12 mo since LMP with no prior hysterectomy)	-15524	Alive	TUMOR FREE	1873	#N/A	[Not Available]	#N/A	#N/A	#N/A	#N/A	[Not Available]	Negative	#N/A	0	1873	0	1873	0	1873	0	1873
556	TCGA-A2-A0D4	BRCA	37	FEMALE	BLACK OR AFRICAN AMERICAN	Stage IIB	[Not Applicable]	Infiltrating Ductal Carcinoma	[Not Available]	2009	Pre (<6 months since LMP AND no prior bilateral ovariectomy AND not on estrogen replacement)	-13805	Alive	TUMOR FREE	767	#N/A	[Not Available]	#N/A	#N/A	#N/A	#N/A	[Not Available]	Negative	#N/A	0	767	0	767	0	767	0	767
557	TCGA-A2-A0EM	BRCA	73	FEMALE	WHITE	Stage IA	[Not Applicable]	Infiltrating Ductal Carcinoma	[Not Available]	2002	Post (prior bilateral ovariectomy OR >12 mo since LMP with no prior hysterectomy)	-26845	Alive	TUMOR FREE	3094	#N/A	[Not Available]	#N/A	#N/A	#N/A	#N/A	[Not Available]	Negative	#N/A	0	3094	0	3094	0	3094	0	3094
558	TCGA-A2-A0EN	BRCA	70	FEMALE	WHITE	Stage IIA	[Not Applicable]	Infiltrating Lobular Carcinoma	[Not Available]	2003	Post (prior bilateral ovariectomy OR >12 mo since LMP with no prior hysterectomy)	-25771	Alive	TUMOR FREE	4088	#N/A	[Not Available]	#N/A	#N/A	#N/A	#N/A	[Not Available]	Negative	#N/A	0	4088	0	4088	0	4088	0	4088
559	TCGA-A2-A0EO	BRCA	54	FEMALE	WHITE	Stage IA	[Not Applicable]	Infiltrating Ductal Carcinoma	[Not Available]	2003	Peri (6-12 months since last menstrual period)	-19880	Alive	TUMOR FREE	2442	#N/A	[Not Available]	#N/A	#N/A	#N/A	#N/A	[Not Available]	Close	#N/A	0	2442	0	2442	#N/A	#N/A	0	2442
560	TCGA-A2-A0EP	BRCA	56	FEMALE	WHITE	Stage I	[Not Applicable]	Infiltrating Lobular Carcinoma	[Not Available]	2004	Post (prior bilateral ovariectomy OR >12 mo since LMP with no prior hysterectomy)	-20585	Alive	TUMOR FREE	3603	#N/A	[Not Available]	#N/A	#N/A	#N/A	#N/A	[Not Available]	Negative	#N/A	0	3603	0	3603	0	3603	0	3603
561	TCGA-A2-A0EQ	BRCA	64	FEMALE	BLACK OR AFRICAN AMERICAN	Stage IIA	[Not Applicable]	Infiltrating Ductal Carcinoma	[Not Available]	2004	Post (prior bilateral ovariectomy OR >12 mo since LMP with no prior hysterectomy)	-23543	Alive	TUMOR FREE	2426	#N/A	[Not Available]	#N/A	#N/A	#N/A	#N/A	[Not Available]	Negative	#N/A	0	2426	0	2426	0	2426	0	2426
562	TCGA-A2-A0ER	BRCA	63	FEMALE	WHITE	Stage IB	[Not Applicable]	Infiltrating Ductal Carcinoma	[Not Available]	2005	Post (prior bilateral ovariectomy OR >12 mo since LMP with no prior hysterectomy)	-23021	Alive	TUMOR FREE	2263	#N/A	[Not Available]	#N/A	#N/A	#N/A	#N/A	[Not Available]	Negative	#N/A	0	2263	0	2263	0	2263	0	2263
563	TCGA-A2-A0ES	BRCA	52	FEMALE	WHITE	Stage IIA	[Not Applicable]	Infiltrating Lobular Carcinoma	[Not Available]	2008	Post (prior bilateral ovariectomy OR >12 mo since LMP with no prior hysterectomy)	-19160	Alive	TUMOR FREE	2190	#N/A	[Not Available]	#N/A	#N/A	#N/A	#N/A	[Not Available]	Negative	#N/A	0	2190	0	2190	0	2190	0	2190
564	TCGA-A2-A0ET	BRCA	58	FEMALE	WHITE	Stage IIIA	[Not Applicable]	Infiltrating Ductal Carcinoma	[Not Available]	2008	Post (prior bilateral ovariectomy OR >12 mo since LMP with no prior hysterectomy)	-21464	Alive	TUMOR FREE	1066	#N/A	[Not Available]	#N/A	#N/A	#N/A	#N/A	[Not Available]	Negative	#N/A	0	1066	0	1066	0	1066	0	1066
565	TCGA-A2-A0EU	BRCA	79	FEMALE	WHITE	Stage IA	[Not Applicable]	Infiltrating Ductal Carcinoma	[Not Available]	2008	Post (prior bilateral ovariectomy OR >12 mo since LMP with no prior hysterectomy)	-29144	Alive	TUMOR FREE	1043	#N/A	[Not Available]	#N/A	#N/A	#N/A	#N/A	[Not Available]	Negative	#N/A	0	1043	0	1043	0	1043	0	1043
566	TCGA-A2-A0EV	BRCA	80	FEMALE	WHITE	Stage IA	[Not Applicable]	Infiltrating Ductal Carcinoma	[Not Available]	2008	Post (prior bilateral ovariectomy OR >12 mo since LMP with no prior hysterectomy)	-29285	Alive	TUMOR FREE	968	#N/A	[Not Available]	#N/A	#N/A	#N/A	#N/A	[Not Available]	Negative	#N/A	0	968	0	968	0	968	0	968
567	TCGA-A2-A0EW	BRCA	53	FEMALE	WHITE	Stage IIIC	[Not Applicable]	Infiltrating Lobular Carcinoma	[Not Available]	2008	Post (prior bilateral ovariectomy OR >12 mo since LMP with no prior hysterectomy)	-19413	Dead	WITH TUMOR	#N/A	1884	[Not Available]	Distant Metastasis	Bone	#N/A	1353	[Not Available]	Positive	#N/A	1	1884	1	1884	#N/A	#N/A	1	1353
568	TCGA-A2-A0EX	BRCA	46	FEMALE	WHITE	Stage IIB	[Not Applicable]	Infiltrating Lobular Carcinoma	[Not Available]	2009	Post (prior bilateral ovariectomy OR >12 mo since LMP with no prior hysterectomy)	-16858	Alive	TUMOR FREE	752	#N/A	[Not Available]	#N/A	#N/A	#N/A	#N/A	[Not Available]	Negative	#N/A	0	752	0	752	0	752	0	752
569	TCGA-A2-A0EY	BRCA	62	FEMALE	WHITE	Stage IIB	[Not Applicable]	Infiltrating Ductal Carcinoma	[Not Available]	2009	Post (prior bilateral ovariectomy OR >12 mo since LMP with no prior hysterectomy)	-22872	Alive	TUMOR FREE	1925	#N/A	[Not Available]	#N/A	#N/A	#N/A	#N/A	[Not Available]	Negative	#N/A	0	1925	0	1925	0	1925	0	1925
570	TCGA-A2-A0ST	BRCA	62	FEMALE	WHITE	Stage IIA	[Not Applicable]	Infiltrating Ductal Carcinoma	[Not Available]	2003	Post (prior bilateral ovariectomy OR >12 mo since LMP with no prior hysterectomy)	-22922	Alive	WITH TUMOR	3017	#N/A	[Not Available]	#N/A	#N/A	#N/A	#N/A	[Not Available]	Negative	#N/A	0	3017	0	3017	0	3017	0	3017
571	TCGA-A2-A0SU	BRCA	66	FEMALE	WHITE	Stage IIA	[Not Applicable]	Infiltrating Ductal Carcinoma	[Not Available]	2006	Post (prior bilateral ovariectomy OR >12 mo since LMP with no prior hysterectomy)	-24219	Alive	TUMOR FREE	1662	#N/A	[Not Available]	#N/A	#N/A	#N/A	#N/A	[Not Available]	Negative	#N/A	0	1662	0	1662	0	1662	0	1662
572	TCGA-A2-A0SV	BRCA	63	FEMALE	WHITE	Stage IV	[Not Applicable]	Infiltrating Ductal Carcinoma	[Not Available]	2006	Post (prior bilateral ovariectomy OR >12 mo since LMP with no prior hysterectomy)	-23126	Dead	WITH TUMOR	#N/A	825	[Not Available]	#N/A	#N/A	#N/A	#N/A	[Not Available]	Positive	#N/A	1	825	1	825	#N/A	#N/A	1	825
573	TCGA-A2-A0SW	BRCA	82	FEMALE	WHITE	Stage IV	[Not Applicable]	Infiltrating Ductal Carcinoma	[Not Available]	2006	Post (prior bilateral ovariectomy OR >12 mo since LMP with no prior hysterectomy)	-30085	Dead	WITH TUMOR	#N/A	1365	[Not Available]	#N/A	#N/A	#N/A	653	[Not Available]	Negative	#N/A	1	1365	1	1365	#N/A	#N/A	1	653
574	TCGA-A2-A0SX	BRCA	48	FEMALE	WHITE	Stage IA	[Not Applicable]	Infiltrating Ductal Carcinoma	[Not Available]	2007	Pre (<6 months since LMP AND no prior bilateral ovariectomy AND not on estrogen replacement)	-17774	Alive	WITH TUMOR	1534	#N/A	[Not Available]	#N/A	#N/A	#N/A	1239	[Not Available]	Negative	#N/A	0	1534	0	1534	1	1239	1	1239
575	TCGA-A2-A0SY	BRCA	62	FEMALE	WHITE	Stage IIIA	[Not Applicable]	Infiltrating Lobular Carcinoma	[Not Available]	2007	Post (prior bilateral ovariectomy OR >12 mo since LMP with no prior hysterectomy)	-22928	Alive	TUMOR FREE	1347	#N/A	[Not Available]	#N/A	#N/A	#N/A	#N/A	[Not Available]	Negative	#N/A	0	1347	0	1347	0	1347	0	1347
576	TCGA-A2-A0T0	BRCA	59	FEMALE	WHITE	Stage IIB	[Not Applicable]	Infiltrating Ductal Carcinoma	[Not Available]	2009	Post (prior bilateral ovariectomy OR >12 mo since LMP with no prior hysterectomy)	-21575	Alive	TUMOR FREE	533	#N/A	[Not Available]	#N/A	#N/A	#N/A	#N/A	[Not Available]	Negative	#N/A	0	533	0	533	0	533	0	533
577	TCGA-A2-A0T1	BRCA	55	FEMALE	AMERICAN INDIAN OR ALASKA NATIVE	Stage IIIC	[Not Applicable]	Infiltrating Ductal Carcinoma	[Not Available]	2009	Post (prior bilateral ovariectomy OR >12 mo since LMP with no prior hysterectomy)	-20227	Alive	TUMOR FREE	521	#N/A	[Not Available]	#N/A	#N/A	#N/A	#N/A	[Not Available]	Negative	#N/A	0	521	0	521	0	521	0	521
578	TCGA-A2-A0T2	BRCA	66	FEMALE	WHITE	Stage IV	[Not Applicable]	Infiltrating Ductal Carcinoma	[Not Available]	2009	Post (prior bilateral ovariectomy OR >12 mo since LMP with no prior hysterectomy)	-24235	Dead	WITH TUMOR	#N/A	255	[Not Available]	#N/A	#N/A	#N/A	#N/A	[Not Available]	Close	#N/A	1	255	1	255	#N/A	#N/A	1	255
579	TCGA-A2-A0T3	BRCA	37	FEMALE	WHITE	Stage IB	[Not Applicable]	Infiltrating Ductal Carcinoma	[Not Available]	2009	Pre (<6 months since LMP AND no prior bilateral ovariectomy AND not on estrogen replacement)	-13680	Alive	TUMOR FREE	1516	#N/A	[Not Available]	#N/A	#N/A	#N/A	#N/A	[Not Available]	Negative	#N/A	0	1516	0	1516	0	1516	0	1516
580	TCGA-A2-A0T4	BRCA	62	FEMALE	WHITE	Stage IIA	[Not Applicable]	Infiltrating Lobular Carcinoma	[Not Available]	2009	Post (prior bilateral ovariectomy OR >12 mo since LMP with no prior hysterectomy)	-22849	Alive	TUMOR FREE	624	#N/A	[Not Available]	#N/A	#N/A	#N/A	#N/A	[Not Available]	Negative	#N/A	0	624	0	624	0	624	0	624
581	TCGA-A2-A0T5	BRCA	39	FEMALE	WHITE	Stage IIA	[Not Applicable]	Infiltrating Ductal Carcinoma	[Not Available]	2009	Pre (<6 months since LMP AND no prior bilateral ovariectomy AND not on estrogen replacement)	-14503	Alive	TUMOR FREE	531	#N/A	[Not Available]	#N/A	#N/A	#N/A	#N/A	[Not Available]	Negative	#N/A	0	531	0	531	0	531	0	531
582	TCGA-A2-A0T6	BRCA	50	FEMALE	WHITE	Stage IIB	[Not Applicable]	Infiltrating Lobular Carcinoma	[Not Available]	2009	Pre (<6 months since LMP AND no prior bilateral ovariectomy AND not on estrogen replacement)	-18334	Alive	TUMOR FREE	575	#N/A	[Not Available]	#N/A	#N/A	#N/A	#N/A	[Not Available]	Negative	#N/A	0	575	0	575	0	575	0	575
583	TCGA-A2-A0T7	BRCA	51	FEMALE	WHITE	Stage IIA	[Not Applicable]	Infiltrating Ductal Carcinoma	[Not Available]	2009	Pre (<6 months since LMP AND no prior bilateral ovariectomy AND not on estrogen replacement)	-18756	Alive	TUMOR FREE	631	#N/A	[Not Available]	#N/A	#N/A	#N/A	#N/A	[Not Available]	Negative	#N/A	0	631	0	631	0	631	0	631
584	TCGA-A2-A0YC	BRCA	59	FEMALE	WHITE	Stage IIB	[Not Applicable]	Infiltrating Ductal Carcinoma	[Not Available]	2008	Post (prior bilateral ovariectomy OR >12 mo since LMP with no prior hysterectomy)	-21685	Alive	WITH TUMOR	990	#N/A	[Not Available]	Locoregional Disease	#N/A	#N/A	756	[Not Available]	Close	#N/A	0	990	0	990	#N/A	#N/A	1	756
585	TCGA-A2-A0YD	BRCA	63	FEMALE	WHITE	Stage IIB	[Not Applicable]	Infiltrating Lobular Carcinoma	[Not Available]	2009	Post (prior bilateral ovariectomy OR >12 mo since LMP with no prior hysterectomy)	-23021	Alive	TUMOR FREE	769	#N/A	[Not Available]	#N/A	#N/A	#N/A	#N/A	[Not Available]	Negative	#N/A	0	769	0	769	0	769	0	769
586	TCGA-A2-A0YE	BRCA	48	FEMALE	WHITE	Stage IIB	[Not Applicable]	Infiltrating Ductal Carcinoma	[Not Available]	2010	Post (prior bilateral ovariectomy OR >12 mo since LMP with no prior hysterectomy)	-17727	Alive	TUMOR FREE	554	#N/A	[Not Available]	#N/A	#N/A	#N/A	#N/A	[Not Available]	Negative	#N/A	0	554	0	554	0	554	0	554
587	TCGA-A2-A0YF	BRCA	67	FEMALE	BLACK OR AFRICAN AMERICAN	Stage I	[Not Applicable]	Infiltrating Ductal Carcinoma	[Not Available]	2009	Post (prior bilateral ovariectomy OR >12 mo since LMP with no prior hysterectomy)	-24660	Alive	TUMOR FREE	1535	#N/A	[Not Available]	#N/A	#N/A	#N/A	#N/A	[Not Available]	Negative	#N/A	0	1535	0	1535	0	1535	0	1535
588	TCGA-A2-A0YG	BRCA	63	FEMALE	WHITE	Stage IIIC	[Not Applicable]	Infiltrating Ductal Carcinoma	[Not Available]	2009	Post (prior bilateral ovariectomy OR >12 mo since LMP with no prior hysterectomy)	-23058	Alive	TUMOR FREE	666	#N/A	[Not Available]	#N/A	#N/A	#N/A	#N/A	[Not Available]	Negative	#N/A	0	666	0	666	0	666	0	666
589	TCGA-A2-A0YH	BRCA	53	FEMALE	WHITE	Stage IIIA	[Not Applicable]	Infiltrating Ductal Carcinoma	[Not Available]	2009	Post (prior bilateral ovariectomy OR >12 mo since LMP with no prior hysterectomy)	-19596	Alive	TUMOR FREE	659	#N/A	[Not Available]	#N/A	#N/A	#N/A	#N/A	[Not Available]	Negative	#N/A	0	659	0	659	0	659	0	659
590	TCGA-A2-A0YI	BRCA	62	FEMALE	WHITE	Stage I	[Not Applicable]	Infiltrating Ductal Carcinoma	[Not Available]	2009	Post (prior bilateral ovariectomy OR >12 mo since LMP with no prior hysterectomy)	-22961	Alive	TUMOR FREE	1505	#N/A	[Not Available]	#N/A	#N/A	#N/A	#N/A	[Not Available]	Negative	#N/A	0	1505	0	1505	0	1505	0	1505
591	TCGA-A2-A0YJ	BRCA	39	FEMALE	WHITE	Stage IIIA	[Not Applicable]	Infiltrating Ductal Carcinoma	[Not Available]	2010	Pre (<6 months since LMP AND no prior bilateral ovariectomy AND not on estrogen replacement)	-14448	Alive	WITH TUMOR	566	#N/A	[Not Available]	Distant Metastasis	Other, specify	Left Cervical Lymph Node	559	[Not Available]	Negative	#N/A	0	566	0	566	1	559	1	559
592	TCGA-A2-A0YK	BRCA	61	FEMALE	WHITE	Stage IIA	[Not Applicable]	Infiltrating Lobular Carcinoma	[Not Available]	2009	Post (prior bilateral ovariectomy OR >12 mo since LMP with no prior hysterectomy)	-22625	Alive	TUMOR FREE	588	#N/A	[Not Available]	#N/A	#N/A	#N/A	#N/A	[Not Available]	Close	#N/A	0	588	0	588	#N/A	#N/A	0	588
593	TCGA-A2-A0YL	BRCA	48	FEMALE	WHITE	Stage IIIA	[Not Applicable]	Infiltrating Lobular Carcinoma	[Not Available]	2010	Pre (<6 months since LMP AND no prior bilateral ovariectomy AND not on estrogen replacement)	-17702	Alive	TUMOR FREE	1474	#N/A	[Not Available]	#N/A	#N/A	#N/A	#N/A	[Not Available]	Negative	#N/A	0	1474	0	1474	0	1474	0	1474
594	TCGA-A2-A0YM	BRCA	67	FEMALE	WHITE	Stage IIA	[Not Applicable]	Infiltrating Ductal Carcinoma	[Not Available]	2008	Post (prior bilateral ovariectomy OR >12 mo since LMP with no prior hysterectomy)	-24831	Alive	TUMOR FREE	965	#N/A	[Not Available]	#N/A	#N/A	#N/A	#N/A	[Not Available]	Negative	#N/A	0	965	0	965	0	965	0	965
595	TCGA-A2-A0YT	BRCA	56	FEMALE	WHITE	Stage IIIB	[Not Applicable]	Infiltrating Ductal Carcinoma	[Not Available]	2008	Post (prior bilateral ovariectomy OR >12 mo since LMP with no prior hysterectomy)	-20482	Dead	TUMOR FREE	#N/A	723	[Not Available]	#N/A	#N/A	#N/A	#N/A	[Not Available]	Negative	#N/A	1	723	0	723	0	723	0	723
596	TCGA-A2-A1FV	BRCA	74	FEMALE	WHITE	Stage IIB	[Not Applicable]	Infiltrating Lobular Carcinoma	[Not Available]	2010	Post (prior bilateral ovariectomy OR >12 mo since LMP with no prior hysterectomy)	-27287	Alive	TUMOR FREE	714	#N/A	[Not Available]	#N/A	#N/A	#N/A	#N/A	[Not Available]	Negative	#N/A	0	714	0	714	0	714	0	714
597	TCGA-A2-A1FW	BRCA	62	FEMALE	WHITE	Stage IIIA	[Not Applicable]	Infiltrating Ductal Carcinoma	[Not Available]	2010	Post (prior bilateral ovariectomy OR >12 mo since LMP with no prior hysterectomy)	-22779	Alive	TUMOR FREE	528	#N/A	[Not Available]	#N/A	#N/A	#N/A	#N/A	[Not Available]	Negative	#N/A	0	528	0	528	0	528	0	528
598	TCGA-A2-A1FX	BRCA	61	FEMALE	WHITE	Stage IIIA	[Not Applicable]	Infiltrating Ductal Carcinoma	[Not Available]	2008	Post (prior bilateral ovariectomy OR >12 mo since LMP with no prior hysterectomy)	-22344	Alive	TUMOR FREE	1847	#N/A	[Not Available]	#N/A	#N/A	#N/A	#N/A	[Not Available]	Negative	#N/A	0	1847	0	1847	0	1847	0	1847
599	TCGA-A2-A1FZ	BRCA	63	FEMALE	WHITE	Stage IIA	[Not Applicable]	Infiltrating Ductal Carcinoma	[Not Available]	2010	Post (prior bilateral ovariectomy OR >12 mo since LMP with no prior hysterectomy)	-23055	Alive	TUMOR FREE	683	#N/A	[Not Available]	#N/A	#N/A	#N/A	#N/A	[Not Available]	Negative	#N/A	0	683	0	683	0	683	0	683
600	TCGA-A2-A1G0	BRCA	49	FEMALE	WHITE	Stage IIB	[Not Applicable]	Other, specify	[Not Available]	2010	Pre (<6 months since LMP AND no prior bilateral ovariectomy AND not on estrogen replacement)	-18002	Alive	TUMOR FREE	616	#N/A	[Not Available]	#N/A	#N/A	#N/A	#N/A	[Not Available]	Negative	#N/A	0	616	0	616	0	616	0	616
601	TCGA-A2-A1G1	BRCA	85	FEMALE	WHITE	Stage IIB	[Not Applicable]	Infiltrating Ductal Carcinoma	[Not Available]	2010	Post (prior bilateral ovariectomy OR >12 mo since LMP with no prior hysterectomy)	-31223	Alive	TUMOR FREE	584	#N/A	[Not Available]	#N/A	#N/A	#N/A	#N/A	[Not Available]	Negative	#N/A	0	584	0	584	0	584	0	584
602	TCGA-A2-A1G4	BRCA	71	FEMALE	WHITE	Stage IIIA	[Not Applicable]	Infiltrating Ductal Carcinoma	[Not Available]	2010	Post (prior bilateral ovariectomy OR >12 mo since LMP with no prior hysterectomy)	-25966	Alive	TUMOR FREE	595	#N/A	[Not Available]	#N/A	#N/A	#N/A	#N/A	[Not Available]	Negative	#N/A	0	595	0	595	0	595	0	595
603	TCGA-A2-A1G6	BRCA	50	FEMALE	WHITE	Stage IIIA	[Not Applicable]	Infiltrating Ductal Carcinoma	[Not Available]	2010	Pre (<6 months since LMP AND no prior bilateral ovariectomy AND not on estrogen replacement)	-18514	Alive	TUMOR FREE	501	#N/A	[Not Available]	#N/A	#N/A	#N/A	#N/A	[Not Available]	Negative	#N/A	0	501	0	501	0	501	0	501
604	TCGA-A2-A259	BRCA	70	FEMALE	BLACK OR AFRICAN AMERICAN	Stage I	[Not Applicable]	Infiltrating Ductal Carcinoma	[Not Available]	2007	Post (prior bilateral ovariectomy OR >12 mo since LMP with no prior hysterectomy)	-25666	Alive	TUMOR FREE	1596	#N/A	[Not Available]	#N/A	#N/A	#N/A	#N/A	[Not Available]	Close	#N/A	0	1596	0	1596	#N/A	#N/A	0	1596
605	TCGA-A2-A25A	BRCA	44	FEMALE	WHITE	Stage IIA	[Not Applicable]	Infiltrating Lobular Carcinoma	[Not Available]	2003	Pre (<6 months since LMP AND no prior bilateral ovariectomy AND not on estrogen replacement)	-16084	Alive	TUMOR FREE	3276	#N/A	[Not Available]	#N/A	#N/A	#N/A	#N/A	[Not Available]	Negative	#N/A	0	3276	0	3276	0	3276	0	3276
606	TCGA-A2-A25B	BRCA	39	FEMALE	BLACK OR AFRICAN AMERICAN	Stage IIB	[Not Applicable]	Infiltrating Ductal Carcinoma	[Not Available]	2010	Pre (<6 months since LMP AND no prior bilateral ovariectomy AND not on estrogen replacement)	-14454	Alive	WITH TUMOR	1291	#N/A	[Not Available]	Distant Metastasis	Bone	#N/A	1290	[Not Available]	Close	#N/A	0	1291	0	1291	#N/A	#N/A	1	1290
607	TCGA-A2-A25C	BRCA	50	FEMALE	WHITE	Stage IIB	[Not Applicable]	Infiltrating Ductal Carcinoma	[Not Available]	2010	Pre (<6 months since LMP AND no prior bilateral ovariectomy AND not on estrogen replacement)	-18508	Alive	TUMOR FREE	523	#N/A	[Not Available]	#N/A	#N/A	#N/A	#N/A	[Not Available]	Negative	#N/A	0	523	0	523	0	523	0	523
608	TCGA-A2-A25D	BRCA	90	FEMALE	WHITE	Stage IIIC	[Not Applicable]	Infiltrating Lobular Carcinoma	[Not Available]	2010	Post (prior bilateral ovariectomy OR >12 mo since LMP with no prior hysterectomy)	-32872	Alive	TUMOR FREE	552	#N/A	[Not Available]	#N/A	#N/A	#N/A	#N/A	[Not Available]	Positive	#N/A	0	552	0	552	#N/A	#N/A	0	552
609	TCGA-A2-A25E	BRCA	34	FEMALE	BLACK OR AFRICAN AMERICAN	Stage IIIA	[Not Applicable]	Infiltrating Ductal Carcinoma	[Not Available]	2004	Pre (<6 months since LMP AND no prior bilateral ovariectomy AND not on estrogen replacement)	-12601	Alive	TUMOR FREE	3204	#N/A	[Not Available]	Locoregional Recurrence	Other, specify	Left Chest Wall	2989	[Not Available]	Negative	#N/A	0	3204	0	3204	1	2989	1	2989
610	TCGA-A2-A25F	BRCA	66	FEMALE	WHITE	Stage IIA	[Not Applicable]	Infiltrating Ductal Carcinoma	[Not Available]	2011	Post (prior bilateral ovariectomy OR >12 mo since LMP with no prior hysterectomy)	-24319	Alive	TUMOR FREE	322	#N/A	[Not Available]	#N/A	#N/A	#N/A	#N/A	[Not Available]	Negative	#N/A	0	322	0	322	0	322	0	322
611	TCGA-A2-A3KC	BRCA	55	FEMALE	BLACK OR AFRICAN AMERICAN	Stage IIB	[Not Applicable]	Infiltrating Lobular Carcinoma	[Not Available]	2011	Pre (<6 months since LMP AND no prior bilateral ovariectomy AND not on estrogen replacement)	-20401	Alive	TUMOR FREE	1102	#N/A	[Not Available]	#N/A	#N/A	#N/A	#N/A	[Not Available]	Negative	#N/A	0	1102	0	1102	0	1102	0	1102
612	TCGA-A2-A3KD	BRCA	47	FEMALE	WHITE	Stage IIIA	[Not Applicable]	Mucinous Carcinoma	[Not Available]	2010	Pre (<6 months since LMP AND no prior bilateral ovariectomy AND not on estrogen replacement)	-17372	Alive	TUMOR FREE	1206	#N/A	[Not Available]	#N/A	#N/A	#N/A	#N/A	[Not Available]	Positive	#N/A	0	1206	0	1206	#N/A	#N/A	0	1206
613	TCGA-A2-A3XS	BRCA	62	FEMALE	BLACK OR AFRICAN AMERICAN	Stage IIIA	[Not Applicable]	Infiltrating Ductal Carcinoma	[Not Available]	2003	Post (prior bilateral ovariectomy OR >12 mo since LMP with no prior hysterectomy)	-23000	Dead	WITH TUMOR	#N/A	1032	[Not Available]	Distant Metastasis	Lung	#N/A	682	[Not Available]	Negative	#N/A	1	1032	1	1032	1	682	1	682
614	TCGA-A2-A3XT	BRCA	45	FEMALE	BLACK OR AFRICAN AMERICAN	Stage IIB	[Not Applicable]	Infiltrating Ductal Carcinoma	[Not Available]	2006	Pre (<6 months since LMP AND no prior bilateral ovariectomy AND not on estrogen replacement)	-16649	Alive	TUMOR FREE	2770	#N/A	[Not Available]	#N/A	#N/A	#N/A	#N/A	[Not Available]	Negative	#N/A	0	2770	0	2770	0	2770	0	2770
615	TCGA-A2-A3XU	BRCA	35	FEMALE	BLACK OR AFRICAN AMERICAN	Stage IIB	[Not Applicable]	Infiltrating Ductal Carcinoma	[Not Available]	2006	Post (prior bilateral ovariectomy OR >12 mo since LMP with no prior hysterectomy)	-13046	Dead	WITH TUMOR	#N/A	912	[Not Available]	Distant Metastasis	Bone	#N/A	574	[Not Available]	Negative	#N/A	1	912	1	912	1	574	1	574
616	TCGA-A2-A3XV	BRCA	46	FEMALE	BLACK OR AFRICAN AMERICAN	Stage IIA	[Not Applicable]	Infiltrating Ductal Carcinoma	[Not Available]	2011	Pre (<6 months since LMP AND no prior bilateral ovariectomy AND not on estrogen replacement)	-16971	Alive	TUMOR FREE	996	#N/A	[Not Available]	#N/A	#N/A	#N/A	#N/A	[Not Available]	Negative	#N/A	0	996	0	996	0	996	0	996
617	TCGA-A2-A3XW	BRCA	42	FEMALE	BLACK OR AFRICAN AMERICAN	Stage IIB	[Not Applicable]	Infiltrating Ductal Carcinoma	[Not Available]	2009	Pre (<6 months since LMP AND no prior bilateral ovariectomy AND not on estrogen replacement)	-15670	Alive	TUMOR FREE	1712	#N/A	[Not Available]	#N/A	#N/A	#N/A	#N/A	[Not Available]	Negative	#N/A	0	1712	0	1712	0	1712	0	1712
618	TCGA-A2-A3XX	BRCA	49	FEMALE	BLACK OR AFRICAN AMERICAN	Stage IIA	[Not Applicable]	Infiltrating Ductal Carcinoma	[Not Available]	2009	Post (prior bilateral ovariectomy OR >12 mo since LMP with no prior hysterectomy)	-17981	Dead	TUMOR FREE	#N/A	1439	[Not Available]	#N/A	#N/A	#N/A	#N/A	[Not Available]	Negative	#N/A	1	1439	0	1439	0	1439	0	1439
619	TCGA-A2-A3XY	BRCA	49	FEMALE	BLACK OR AFRICAN AMERICAN	Stage IIB	[Not Applicable]	Infiltrating Ductal Carcinoma	[Not Available]	2010	Post (prior bilateral ovariectomy OR >12 mo since LMP with no prior hysterectomy)	-18059	Dead	WITH TUMOR	#N/A	1093	[Not Available]	Distant Metastasis	Lung	#N/A	802	[Not Available]	Negative	#N/A	1	1093	1	1093	1	802	1	802
620	TCGA-A2-A3XZ	BRCA	46	FEMALE	BLACK OR AFRICAN AMERICAN	Stage I	[Not Applicable]	Infiltrating Ductal Carcinoma	[Not Available]	2009	Pre (<6 months since LMP AND no prior bilateral ovariectomy AND not on estrogen replacement)	-16978	Alive	TUMOR FREE	1532	#N/A	[Not Available]	#N/A	#N/A	#N/A	#N/A	[Not Available]	Negative	#N/A	0	1532	0	1532	0	1532	0	1532
621	TCGA-A2-A3Y0	BRCA	57	FEMALE	BLACK OR AFRICAN AMERICAN	Stage IIB	[Not Applicable]	Infiltrating Ductal Carcinoma	[Not Available]	2010	Post (prior bilateral ovariectomy OR >12 mo since LMP with no prior hysterectomy)	-21024	Alive	TUMOR FREE	1546	#N/A	[Not Available]	#N/A	#N/A	#N/A	#N/A	[Not Available]	Close	#N/A	0	1546	0	1546	#N/A	#N/A	0	1546
622	TCGA-A2-A4RW	BRCA	49	FEMALE	WHITE	Stage IIIC	[Not Applicable]	Infiltrating Lobular Carcinoma	[Not Available]	2011	Pre (<6 months since LMP AND no prior bilateral ovariectomy AND not on estrogen replacement)	-18060	Alive	TUMOR FREE	222	#N/A	[Not Available]	#N/A	#N/A	#N/A	#N/A	[Not Available]	Negative	#N/A	0	222	0	222	0	222	0	222
623	TCGA-A2-A4RX	BRCA	67	FEMALE	BLACK OR AFRICAN AMERICAN	Stage IIA	[Not Applicable]	Metaplastic Carcinoma	[Not Available]	2012	Post (prior bilateral ovariectomy OR >12 mo since LMP with no prior hysterectomy)	-24779	Alive	TUMOR FREE	742	#N/A	[Not Available]	#N/A	#N/A	#N/A	#N/A	[Not Available]	Negative	#N/A	0	742	0	742	0	742	0	742
624	TCGA-A2-A4RY	BRCA	46	FEMALE	WHITE	Stage IIIC	[Not Applicable]	Infiltrating Lobular Carcinoma	[Not Available]	2012	Pre (<6 months since LMP AND no prior bilateral ovariectomy AND not on estrogen replacement)	-17157	Alive	TUMOR FREE	648	#N/A	[Not Available]	#N/A	#N/A	#N/A	#N/A	[Not Available]	Negative	#N/A	0	648	0	648	0	648	0	648
625	TCGA-A2-A4S0	BRCA	77	FEMALE	WHITE	Stage IIA	[Not Applicable]	Mucinous Carcinoma	[Not Available]	2012	Post (prior bilateral ovariectomy OR >12 mo since LMP with no prior hysterectomy)	-28416	Alive	TUMOR FREE	706	#N/A	[Not Available]	#N/A	#N/A	#N/A	#N/A	[Not Available]	Negative	#N/A	0	706	0	706	0	706	0	706
626	TCGA-A2-A4S1	BRCA	66	FEMALE	WHITE	Stage IIA	[Not Applicable]	Metaplastic Carcinoma	[Not Available]	2012	Post (prior bilateral ovariectomy OR >12 mo since LMP with no prior hysterectomy)	-24353	Alive	TUMOR FREE	820	#N/A	[Not Available]	#N/A	#N/A	#N/A	#N/A	[Not Available]	Negative	#N/A	0	820	0	820	0	820	0	820
627	TCGA-A2-A4S2	BRCA	62	FEMALE	WHITE	Stage IIIA	[Not Applicable]	Infiltrating Lobular Carcinoma	[Not Available]	2012	Post (prior bilateral ovariectomy OR >12 mo since LMP with no prior hysterectomy)	-22936	Alive	TUMOR FREE	643	#N/A	[Not Available]	#N/A	#N/A	#N/A	#N/A	[Not Available]	Negative	#N/A	0	643	0	643	0	643	0	643
628	TCGA-A2-A4S3	BRCA	59	FEMALE	BLACK OR AFRICAN AMERICAN	Stage IIB	[Not Applicable]	Infiltrating Ductal Carcinoma	[Not Available]	2012	Post (prior bilateral ovariectomy OR >12 mo since LMP with no prior hysterectomy)	-21762	Alive	TUMOR FREE	666	#N/A	[Not Available]	#N/A	#N/A	#N/A	#N/A	[Not Available]	Negative	#N/A	0	666	0	666	0	666	0	666
629	TCGA-A7-A0CD	BRCA	66	FEMALE	WHITE	Stage I	[Not Applicable]	Infiltrating Ductal Carcinoma	[Not Available]	2009	Indeterminate (neither Pre or Postmenopausal)	-24242	Alive	TUMOR FREE	1165	#N/A	[Not Available]	#N/A	#N/A	#N/A	#N/A	[Not Available]	Negative	#N/A	0	1165	0	1165	0	1165	0	1165
630	TCGA-A7-A0CE	BRCA	57	FEMALE	WHITE	Stage IIA	[Not Applicable]	Infiltrating Ductal Carcinoma	[Not Available]	2009	Indeterminate (neither Pre or Postmenopausal)	-20863	Alive	TUMOR FREE	1074	#N/A	[Not Available]	#N/A	#N/A	#N/A	#N/A	[Not Available]	Negative	#N/A	0	1074	0	1074	0	1074	0	1074
631	TCGA-A7-A0CG	BRCA	78	FEMALE	WHITE	Stage IIA	[Not Applicable]	Mixed Histology (please specify)	[Not Available]	2010	Post (prior bilateral ovariectomy OR >12 mo since LMP with no prior hysterectomy)	-28596	Alive	TUMOR FREE	1043	#N/A	[Not Available]	#N/A	#N/A	#N/A	#N/A	[Not Available]	Close	#N/A	0	1043	0	1043	#N/A	#N/A	0	1043
632	TCGA-A7-A0CH	BRCA	79	FEMALE	WHITE	Stage IIA	[Not Applicable]	Infiltrating Ductal Carcinoma	[Not Available]	2009	Post (prior bilateral ovariectomy OR >12 mo since LMP with no prior hysterectomy)	-29104	Alive	TUMOR FREE	1079	#N/A	[Not Available]	#N/A	#N/A	#N/A	#N/A	[Not Available]	Negative	#N/A	0	1079	0	1079	0	1079	0	1079
633	TCGA-A7-A0CJ	BRCA	57	FEMALE	WHITE	Stage IIA	[Not Applicable]	Infiltrating Ductal Carcinoma	[Not Available]	2010	Post (prior bilateral ovariectomy OR >12 mo since LMP with no prior hysterectomy)	-21014	Alive	TUMOR FREE	931	#N/A	[Not Available]	#N/A	#N/A	#N/A	#N/A	[Not Available]	Positive	#N/A	0	931	0	931	#N/A	#N/A	0	931
634	TCGA-A7-A0D9	BRCA	37	FEMALE	WHITE	Stage IIA	[Not Applicable]	Infiltrating Ductal Carcinoma	[Not Available]	2009	Pre (<6 months since LMP AND no prior bilateral ovariectomy AND not on estrogen replacement)	-13836	Alive	TUMOR FREE	1139	#N/A	[Not Available]	#N/A	#N/A	#N/A	#N/A	[Not Available]	Negative	#N/A	0	1139	0	1139	0	1139	0	1139
635	TCGA-A7-A0DA	BRCA	62	FEMALE	WHITE	Stage IIA	[Not Applicable]	Infiltrating Ductal Carcinoma	[Not Available]	2009	Post (prior bilateral ovariectomy OR >12 mo since LMP with no prior hysterectomy)	-22708	Alive	TUMOR FREE	1085	#N/A	[Not Available]	#N/A	#N/A	#N/A	#N/A	[Not Available]	Negative	#N/A	0	1085	0	1085	0	1085	0	1085
636	TCGA-A7-A0DB	BRCA	56	FEMALE	WHITE	Stage IIA	[Not Applicable]	Infiltrating Ductal Carcinoma	[Not Available]	2009	Post (prior bilateral ovariectomy OR >12 mo since LMP with no prior hysterectomy)	-20570	Alive	TUMOR FREE	1007	#N/A	[Not Available]	#N/A	#N/A	#N/A	#N/A	[Not Available]	Close	#N/A	0	1007	0	1007	#N/A	#N/A	0	1007
637	TCGA-A7-A0DC	BRCA	63	FEMALE	WHITE	Stage IA	[Not Applicable]	Infiltrating Ductal Carcinoma	[Not Available]	2009	Post (prior bilateral ovariectomy OR >12 mo since LMP with no prior hysterectomy)	-23294	Alive	TUMOR FREE	906	#N/A	[Not Available]	#N/A	#N/A	#N/A	#N/A	[Not Available]	Negative	#N/A	0	906	0	906	0	906	0	906	Redacted
638	TCGA-A7-A13D	BRCA	46	FEMALE	BLACK OR AFRICAN AMERICAN	Stage IIA	[Not Applicable]	Infiltrating Ductal Carcinoma	[Not Available]	2010	Post (prior bilateral ovariectomy OR >12 mo since LMP with no prior hysterectomy)	-17070	Alive	TUMOR FREE	965	#N/A	[Not Available]	#N/A	#N/A	#N/A	#N/A	[Not Available]	Negative	#N/A	0	965	0	965	0	965	0	965
639	TCGA-A7-A13E	BRCA	62	FEMALE	WHITE	Stage IIB	[Not Applicable]	Infiltrating Ductal Carcinoma	[Not Available]	2010	Post (prior bilateral ovariectomy OR >12 mo since LMP with no prior hysterectomy)	-22690	Dead	WITH TUMOR	#N/A	614	[Not Available]	Distant Metastasis	Other, specify	Lung, Bone, Liver, Brain and Skin Nodules	556	[Not Available]	Negative	#N/A	1	614	1	614	1	556	1	556
640	TCGA-A7-A13F	BRCA	44	FEMALE	WHITE	Stage IIIA	[Not Applicable]	Infiltrating Ductal Carcinoma	[Not Available]	2010	Pre (<6 months since LMP AND no prior bilateral ovariectomy AND not on estrogen replacement)	-16363	Alive	TUMOR FREE	765	#N/A	[Not Available]	#N/A	#N/A	#N/A	#N/A	[Not Available]	Negative	#N/A	0	765	0	765	0	765	0	765
641	TCGA-A7-A13G	BRCA	79	FEMALE	WHITE	Stage IIA	[Not Applicable]	Infiltrating Ductal Carcinoma	[Not Available]	2010	Post (prior bilateral ovariectomy OR >12 mo since LMP with no prior hysterectomy)	-28969	Alive	TUMOR FREE	718	#N/A	[Not Available]	New Primary Tumor	Other, specify	Skin, right leg	586	[Not Available]	Negative	#N/A	0	718	0	718	0	718	1	586
642	TCGA-A7-A13H	BRCA	61	FEMALE	WHITE	Stage IIB	[Not Applicable]	Infiltrating Lobular Carcinoma	[Not Available]	2010	Post (prior bilateral ovariectomy OR >12 mo since LMP with no prior hysterectomy)	-22643	Alive	TUMOR FREE	899	#N/A	[Not Available]	New Primary Tumor	Other, specify	Skin lesion-Basal Cell Left Lower Lateral Back	795	[Not Available]	Negative	#N/A	0	899	0	899	0	899	1	795
643	TCGA-A7-A26E	BRCA	71	FEMALE	WHITE	Stage IIIA	[Not Applicable]	Infiltrating Lobular Carcinoma	[Not Available]	2010	Post (prior bilateral ovariectomy OR >12 mo since LMP with no prior hysterectomy)	-26274	Alive	TUMOR FREE	954	#N/A	[Not Available]	#N/A	#N/A	#N/A	#N/A	[Not Available]	Negative	#N/A	0	954	0	954	0	954	0	954
644	TCGA-A7-A26F	BRCA	55	FEMALE	WHITE	Stage IA	[Not Applicable]	Other, specify	[Not Available]	2010	Post (prior bilateral ovariectomy OR >12 mo since LMP with no prior hysterectomy)	-20210	Alive	TUMOR FREE	738	#N/A	[Not Available]	#N/A	#N/A	#N/A	#N/A	[Not Available]	Negative	#N/A	0	738	0	738	0	738	0	738
645	TCGA-A7-A26G	BRCA	50	FEMALE	BLACK OR AFRICAN AMERICAN	Stage IIA	[Not Applicable]	Other, specify	[Not Available]	2010	Pre (<6 months since LMP AND no prior bilateral ovariectomy AND not on estrogen replacement)	-18362	Alive	TUMOR FREE	722	#N/A	[Not Available]	#N/A	#N/A	#N/A	#N/A	[Not Available]	Negative	#N/A	0	722	0	722	0	722	0	722
646	TCGA-A7-A26H	BRCA	72	FEMALE	WHITE	Stage IIA	[Not Applicable]	Infiltrating Ductal Carcinoma	[Not Available]	2011	Post (prior bilateral ovariectomy OR >12 mo since LMP with no prior hysterectomy)	-26423	Alive	WITH TUMOR	724	#N/A	[Not Available]	Distant Metastasis	Liver	#N/A	291	[Not Available]	Negative	#N/A	0	724	0	724	1	291	1	291
647	TCGA-A7-A26I	BRCA	65	FEMALE	WHITE	Stage IIA	[Not Applicable]	Infiltrating Ductal Carcinoma	[Not Available]	2011	Post (prior bilateral ovariectomy OR >12 mo since LMP with no prior hysterectomy)	-23948	Alive	TUMOR FREE	661	#N/A	[Not Available]	#N/A	#N/A	#N/A	#N/A	[Not Available]	Negative	#N/A	0	661	0	661	0	661	0	661
648	TCGA-A7-A26J	BRCA	49	FEMALE	WHITE	Stage IIA	[Not Applicable]	Infiltrating Ductal Carcinoma	[Not Available]	2011	Pre (<6 months since LMP AND no prior bilateral ovariectomy AND not on estrogen replacement)	-17930	Alive	TUMOR FREE	627	#N/A	[Not Available]	#N/A	#N/A	#N/A	#N/A	[Not Available]	Negative	#N/A	0	627	0	627	0	627	0	627
649	TCGA-A7-A2KD	BRCA	53	FEMALE	BLACK OR AFRICAN AMERICAN	Stage IIIA	[Not Applicable]	Infiltrating Ductal Carcinoma	[Not Available]	2011	Post (prior bilateral ovariectomy OR >12 mo since LMP with no prior hysterectomy)	-19563	Alive	TUMOR FREE	679	#N/A	[Not Available]	#N/A	#N/A	#N/A	#N/A	[Not Available]	Negative	#N/A	0	679	0	679	0	679	0	679
650	TCGA-A7-A3IY	BRCA	71	FEMALE	WHITE	Stage I	[Not Applicable]	Mucinous Carcinoma	[Not Available]	2011	Post (prior bilateral ovariectomy OR >12 mo since LMP with no prior hysterectomy)	-26042	Alive	TUMOR FREE	345	#N/A	[Not Available]	#N/A	#N/A	#N/A	#N/A	[Not Available]	Negative	#N/A	0	345	0	345	0	345	0	345
651	TCGA-A7-A3IZ	BRCA	62	FEMALE	WHITE	Stage IIA	[Not Applicable]	Infiltrating Lobular Carcinoma	[Not Available]	2011	Post (prior bilateral ovariectomy OR >12 mo since LMP with no prior hysterectomy)	-22997	Alive	TUMOR FREE	322	#N/A	[Not Available]	#N/A	#N/A	#N/A	#N/A	[Not Available]	Negative	#N/A	0	322	0	322	0	322	0	322
652	TCGA-A7-A3J0	BRCA	62	FEMALE	WHITE	Stage IIA	[Not Applicable]	Mucinous Carcinoma	[Not Available]	2011	Post (prior bilateral ovariectomy OR >12 mo since LMP with no prior hysterectomy)	-22672	Alive	TUMOR FREE	313	#N/A	[Not Available]	#N/A	#N/A	#N/A	#N/A	[Not Available]	Negative	#N/A	0	313	0	313	0	313	0	313
653	TCGA-A7-A3J1	BRCA	63	FEMALE	WHITE	Stage IA	[Not Applicable]	Infiltrating Lobular Carcinoma	[Not Available]	2011	Post (prior bilateral ovariectomy OR >12 mo since LMP with no prior hysterectomy)	-23209	Alive	TUMOR FREE	343	#N/A	[Not Available]	#N/A	#N/A	#N/A	#N/A	[Not Available]	Negative	#N/A	0	343	0	343	0	343	0	343
654	TCGA-A7-A3RF	BRCA	79	FEMALE	WHITE	Stage IIA	[Not Applicable]	Mucinous Carcinoma	[Not Available]	2012	Post (prior bilateral ovariectomy OR >12 mo since LMP with no prior hysterectomy)	-29184	Alive	WITH TUMOR	408	#N/A	[Not Available]	Distant Metastasis	Bone	#N/A	174	[Not Available]	Negative	#N/A	0	408	0	408	1	174	1	174
655	TCGA-A7-A425	BRCA	70	FEMALE	WHITE	Stage IIIC	[Not Applicable]	Infiltrating Lobular Carcinoma	[Not Available]	2012	Post (prior bilateral ovariectomy OR >12 mo since LMP with no prior hysterectomy)	-25678	Alive	WITH TUMOR	447	#N/A	[Not Available]	Locoregional Recurrence	Other, specify	Left Breast	419	[Not Available]	Negative	#N/A	0	447	0	447	1	419	1	419
656	TCGA-A7-A426	BRCA	50	FEMALE	WHITE	Stage IIIC	[Not Applicable]	Infiltrating Lobular Carcinoma	[Not Available]	2012	Pre (<6 months since LMP AND no prior bilateral ovariectomy AND not on estrogen replacement)	-18296	Alive	TUMOR FREE	364	#N/A	[Not Available]	#N/A	#N/A	#N/A	#N/A	[Not Available]	Negative	#N/A	0	364	0	364	0	364	0	364
657	TCGA-A7-A4SA	BRCA	40	FEMALE	WHITE	Stage IIB	[Not Applicable]	Infiltrating Lobular Carcinoma	[Not Available]	2012	Pre (<6 months since LMP AND no prior bilateral ovariectomy AND not on estrogen replacement)	-14906	Alive	TUMOR FREE	454	#N/A	[Not Available]	#N/A	#N/A	#N/A	#N/A	[Not Available]	Negative	#N/A	0	454	0	454	0	454	0	454
658	TCGA-A7-A4SB	BRCA	56	FEMALE	WHITE	Stage IIIA	[Not Applicable]	Infiltrating Lobular Carcinoma	[Not Available]	2012	Post (prior bilateral ovariectomy OR >12 mo since LMP with no prior hysterectomy)	-20539	Alive	TUMOR FREE	418	#N/A	[Not Available]	#N/A	#N/A	#N/A	#N/A	[Not Available]	Negative	#N/A	0	418	0	418	0	418	0	418
659	TCGA-A7-A4SC	BRCA	62	FEMALE	WHITE	Stage IIB	[Not Applicable]	Infiltrating Lobular Carcinoma	[Not Available]	2012	Post (prior bilateral ovariectomy OR >12 mo since LMP with no prior hysterectomy)	-23008	Alive	TUMOR FREE	446	#N/A	[Not Available]	#N/A	#N/A	#N/A	#N/A	[Not Available]	Negative	#N/A	0	446	0	446	0	446	0	446
660	TCGA-A7-A4SD	BRCA	52	FEMALE	BLACK OR AFRICAN AMERICAN	Stage IIA	[Not Applicable]	Infiltrating Ductal Carcinoma	[Not Available]	2012	Post (prior bilateral ovariectomy OR >12 mo since LMP with no prior hysterectomy)	-19131	Alive	TUMOR FREE	441	#N/A	[Not Available]	#N/A	#N/A	#N/A	#N/A	[Not Available]	Negative	#N/A	0	441	0	441	0	441	0	441
661	TCGA-A7-A4SE	BRCA	54	FEMALE	BLACK OR AFRICAN AMERICAN	Stage IIA	[Not Applicable]	Infiltrating Ductal Carcinoma	[Not Available]	2011	Post (prior bilateral ovariectomy OR >12 mo since LMP with no prior hysterectomy)	-20080	Alive	TUMOR FREE	644	#N/A	[Not Available]	#N/A	#N/A	#N/A	#N/A	[Not Available]	Negative	#N/A	0	644	0	644	0	644	0	644
662	TCGA-A7-A4SF	BRCA	54	FEMALE	BLACK OR AFRICAN AMERICAN	Stage IIA	[Not Applicable]	Infiltrating Ductal Carcinoma	[Not Available]	2012	Post (prior bilateral ovariectomy OR >12 mo since LMP with no prior hysterectomy)	-19985	Alive	TUMOR FREE	545	#N/A	[Not Available]	#N/A	#N/A	#N/A	#N/A	[Not Available]	Positive	#N/A	0	545	0	545	#N/A	#N/A	0	545
663	TCGA-A7-A56D	BRCA	84	FEMALE	BLACK OR AFRICAN AMERICAN	Stage IIA	[Not Applicable]	Infiltrating Ductal Carcinoma	[Not Available]	2012	Post (prior bilateral ovariectomy OR >12 mo since LMP with no prior hysterectomy)	-30783	Alive	TUMOR FREE	448	#N/A	[Not Available]	#N/A	#N/A	#N/A	#N/A	[Not Available]	Negative	#N/A	0	448	0	448	0	448	0	448
664	TCGA-A7-A5ZV	BRCA	62	FEMALE	BLACK OR AFRICAN AMERICAN	Stage IIA	[Not Applicable]	Infiltrating Carcinoma NOS	[Not Available]	2012	Post (prior bilateral ovariectomy OR >12 mo since LMP with no prior hysterectomy)	-22966	Alive	TUMOR FREE	368	#N/A	[Not Available]	#N/A	#N/A	#N/A	#N/A	[Not Available]	Negative	#N/A	0	368	0	368	0	368	0	368
665	TCGA-A7-A5ZW	BRCA	47	FEMALE	BLACK OR AFRICAN AMERICAN	Stage IIA	[Not Applicable]	Infiltrating Ductal Carcinoma	[Not Available]	2012	Peri (6-12 months since last menstrual period)	-17529	Alive	TUMOR FREE	326	#N/A	[Not Available]	#N/A	#N/A	#N/A	#N/A	[Not Available]	Negative	#N/A	0	326	0	326	0	326	0	326
666	TCGA-A7-A5ZX	BRCA	48	FEMALE	WHITE	Stage IIIC	[Not Applicable]	Infiltrating Lobular Carcinoma	[Not Available]	2012	Pre (<6 months since LMP AND no prior bilateral ovariectomy AND not on estrogen replacement)	-17683	Alive	TUMOR FREE	336	#N/A	[Not Available]	#N/A	#N/A	#N/A	#N/A	[Not Available]	[Unknown]	#N/A	0	336	0	336	#N/A	#N/A	0	336
667	TCGA-A7-A6VV	BRCA	51	FEMALE	BLACK OR AFRICAN AMERICAN	Stage IIA	[Not Applicable]	Infiltrating Ductal Carcinoma	[Not Available]	2013	Peri (6-12 months since last menstrual period)	-18695	Alive	TUMOR FREE	313	#N/A	[Not Available]	#N/A	#N/A	#N/A	#N/A	[Not Available]	Negative	#N/A	0	313	0	313	0	313	0	313
668	TCGA-A7-A6VW	BRCA	48	FEMALE	BLACK OR AFRICAN AMERICAN	Stage IIA	[Not Applicable]	Infiltrating Ductal Carcinoma	[Not Available]	2013	Post (prior bilateral ovariectomy OR >12 mo since LMP with no prior hysterectomy)	-17539	Alive	TUMOR FREE	285	#N/A	[Not Available]	#N/A	#N/A	#N/A	#N/A	[Not Available]	Close	#N/A	0	285	0	285	#N/A	#N/A	0	285
669	TCGA-A7-A6VX	BRCA	68	FEMALE	BLACK OR AFRICAN AMERICAN	Stage IIA	[Not Applicable]	Infiltrating Ductal Carcinoma	[Not Available]	2013	Post (prior bilateral ovariectomy OR >12 mo since LMP with no prior hysterectomy)	-25066	Alive	TUMOR FREE	317	#N/A	[Not Available]	#N/A	#N/A	#N/A	#N/A	[Not Available]	Negative	#N/A	0	317	0	317	0	317	0	317
670	TCGA-A7-A6VY	BRCA	48	FEMALE	BLACK OR AFRICAN AMERICAN	Stage IIB	[Not Applicable]	Infiltrating Ductal Carcinoma	[Not Available]	2013	Post (prior bilateral ovariectomy OR >12 mo since LMP with no prior hysterectomy)	-17640	Alive	TUMOR FREE	266	#N/A	[Not Available]	#N/A	#N/A	#N/A	#N/A	[Not Available]	Negative	#N/A	0	266	0	266	0	266	0	266
671	TCGA-A8-A06N	BRCA	66	FEMALE	[Not Available]	Stage IIIB	[Not Applicable]	Infiltrating Ductal Carcinoma	[Not Available]	2009	Post (prior bilateral ovariectomy OR >12 mo since LMP with no prior hysterectomy)	-24288	Alive	TUMOR FREE	0	#N/A	[Not Available]	#N/A	#N/A	#N/A	#N/A	[Not Available]	Negative	#N/A	0	0	0	0	0	0	0	0
672	TCGA-A8-A06O	BRCA	60	FEMALE	[Not Available]	Stage I	[Not Applicable]	Infiltrating Ductal Carcinoma	[Not Available]	2009	Post (prior bilateral ovariectomy OR >12 mo since LMP with no prior hysterectomy)	-22157	Alive	TUMOR FREE	396	#N/A	[Not Available]	#N/A	#N/A	#N/A	#N/A	[Not Available]	Negative	#N/A	0	396	0	396	0	396	0	396
673	TCGA-A8-A06P	BRCA	63	FEMALE	[Not Available]	Stage IIIA	[Not Applicable]	Infiltrating Ductal Carcinoma	[Not Available]	2009	Post (prior bilateral ovariectomy OR >12 mo since LMP with no prior hysterectomy)	-23011	Alive	TUMOR FREE	396	#N/A	[Not Available]	#N/A	#N/A	#N/A	#N/A	[Not Available]	Negative	#N/A	0	396	0	396	0	396	0	396
674	TCGA-A8-A06Q	BRCA	63	FEMALE	[Not Available]	Stage IIIA	[Not Applicable]	Infiltrating Ductal Carcinoma	[Not Available]	2007	Post (prior bilateral ovariectomy OR >12 mo since LMP with no prior hysterectomy)	-23164	Alive	TUMOR FREE	31	#N/A	[Not Available]	#N/A	#N/A	#N/A	#N/A	[Not Available]	Negative	#N/A	0	31	0	31	0	31	0	31
675	TCGA-A8-A06R	BRCA	69	FEMALE	[Not Available]	Stage IIB	[Not Applicable]	Infiltrating Ductal Carcinoma	[Not Available]	2007	Post (prior bilateral ovariectomy OR >12 mo since LMP with no prior hysterectomy)	-25477	Alive	TUMOR FREE	547	#N/A	[Not Available]	#N/A	#N/A	#N/A	#N/A	[Not Available]	Negative	#N/A	0	547	0	547	0	547	0	547
676	TCGA-A8-A06T	BRCA	75	FEMALE	[Not Available]	Stage IIIA	[Not Applicable]	Infiltrating Ductal Carcinoma	[Not Available]	2007	Post (prior bilateral ovariectomy OR >12 mo since LMP with no prior hysterectomy)	-27393	Alive	TUMOR FREE	1614	#N/A	[Not Available]	#N/A	#N/A	#N/A	#N/A	[Not Available]	Negative	#N/A	0	1614	0	1614	0	1614	0	1614
677	TCGA-A8-A06U	BRCA	80	FEMALE	[Not Available]	Stage IIB	[Not Applicable]	Infiltrating Ductal Carcinoma	[Not Available]	2008	Post (prior bilateral ovariectomy OR >12 mo since LMP with no prior hysterectomy)	-29525	Dead	TUMOR FREE	#N/A	883	[Not Available]	#N/A	#N/A	#N/A	#N/A	[Not Available]	Negative	#N/A	1	883	0	883	0	883	0	883
678	TCGA-A8-A06X	BRCA	77	FEMALE	[Not Available]	Stage IIB	[Not Applicable]	Infiltrating Ductal Carcinoma	[Not Available]	2006	Post (prior bilateral ovariectomy OR >12 mo since LMP with no prior hysterectomy)	-28338	Dead	TUMOR FREE	#N/A	943	[Not Available]	#N/A	#N/A	#N/A	#N/A	[Not Available]	Negative	#N/A	1	943	0	943	0	943	0	943
679	TCGA-A8-A06Y	BRCA	66	FEMALE	[Not Available]	Stage IIA	[Not Applicable]	Infiltrating Ductal Carcinoma	[Not Available]	2008	Post (prior bilateral ovariectomy OR >12 mo since LMP with no prior hysterectomy)	-24442	Alive	TUMOR FREE	791	#N/A	[Not Available]	#N/A	#N/A	#N/A	791	[Not Available]	Negative	#N/A	0	791	0	791	1	791	1	791
680	TCGA-A8-A06Z	BRCA	84	FEMALE	[Not Available]	Stage IIB	[Not Applicable]	Infiltrating Ductal Carcinoma	[Not Available]	2007	Post (prior bilateral ovariectomy OR >12 mo since LMP with no prior hysterectomy)	-30984	Alive	#N/A	31	#N/A	[Not Available]	#N/A	#N/A	#N/A	#N/A	[Not Available]	[Not Available]	#N/A	0	31	0	31	#N/A	#N/A	0	31
681	TCGA-A8-A075	BRCA	42	FEMALE	[Not Available]	Stage IIB	[Not Applicable]	Infiltrating Ductal Carcinoma	[Not Available]	2009	Pre (<6 months since LMP AND no prior bilateral ovariectomy AND not on estrogen replacement)	-15369	Alive	TUMOR FREE	518	#N/A	[Not Available]	#N/A	#N/A	#N/A	#N/A	[Not Available]	Negative	#N/A	0	518	0	518	0	518	0	518
682	TCGA-A8-A076	BRCA	66	FEMALE	[Not Available]	Stage IIA	[Not Applicable]	Infiltrating Ductal Carcinoma	[Not Available]	2006	Post (prior bilateral ovariectomy OR >12 mo since LMP with no prior hysterectomy)	-24230	Alive	TUMOR FREE	1642	#N/A	[Not Available]	#N/A	#N/A	#N/A	#N/A	[Not Available]	Negative	#N/A	0	1642	0	1642	0	1642	0	1642
683	TCGA-A8-A079	BRCA	69	FEMALE	[Not Available]	Stage IIIB	[Not Applicable]	Infiltrating Ductal Carcinoma	[Not Available]	2007	Post (prior bilateral ovariectomy OR >12 mo since LMP with no prior hysterectomy)	-25294	Alive	TUMOR FREE	274	#N/A	[Not Available]	#N/A	#N/A	#N/A	#N/A	[Not Available]	Negative	#N/A	0	274	0	274	0	274	0	274
684	TCGA-A8-A07B	BRCA	69	FEMALE	[Not Available]	Stage IIA	[Not Applicable]	Infiltrating Ductal Carcinoma	[Not Available]	2007	Post (prior bilateral ovariectomy OR >12 mo since LMP with no prior hysterectomy)	-25475	Alive	TUMOR FREE	1308	#N/A	[Not Available]	#N/A	#N/A	#N/A	#N/A	[Not Available]	Negative	#N/A	0	1308	0	1308	0	1308	0	1308
685	TCGA-A8-A07C	BRCA	57	FEMALE	[Not Available]	Stage IIA	[Not Applicable]	Infiltrating Ductal Carcinoma	[Not Available]	2008	Post (prior bilateral ovariectomy OR >12 mo since LMP with no prior hysterectomy)	-20820	Alive	TUMOR FREE	1034	#N/A	[Not Available]	#N/A	#N/A	#N/A	#N/A	[Not Available]	Negative	#N/A	0	1034	0	1034	0	1034	0	1034
686	TCGA-A8-A07E	BRCA	81	FEMALE	[Not Available]	Stage X	[Not Applicable]	Infiltrating Ductal Carcinoma	[Not Available]	2008	Post (prior bilateral ovariectomy OR >12 mo since LMP with no prior hysterectomy)	-29800	Alive	TUMOR FREE	608	#N/A	[Not Available]	#N/A	#N/A	#N/A	#N/A	[Not Available]	Negative	#N/A	0	608	0	608	0	608	0	608
687	TCGA-A8-A07F	BRCA	65	FEMALE	[Not Available]	Stage IIB	[Not Applicable]	Infiltrating Ductal Carcinoma	[Not Available]	2009	Post (prior bilateral ovariectomy OR >12 mo since LMP with no prior hysterectomy)	-23742	Alive	TUMOR FREE	577	#N/A	[Not Available]	#N/A	#N/A	#N/A	#N/A	[Not Available]	Negative	#N/A	0	577	0	577	0	577	0	577
688	TCGA-A8-A07G	BRCA	65	FEMALE	[Not Available]	Stage IIA	[Not Applicable]	Infiltrating Ductal Carcinoma	[Not Available]	2009	Post (prior bilateral ovariectomy OR >12 mo since LMP with no prior hysterectomy)	-23926	Alive	TUMOR FREE	577	#N/A	[Not Available]	#N/A	#N/A	#N/A	#N/A	[Not Available]	Negative	#N/A	0	577	0	577	0	577	0	577
689	TCGA-A8-A07I	BRCA	69	FEMALE	[Not Available]	Stage IIIA	[Not Applicable]	Infiltrating Ductal Carcinoma	[Not Available]	2009	Post (prior bilateral ovariectomy OR >12 mo since LMP with no prior hysterectomy)	-25263	Alive	TUMOR FREE	426	#N/A	[Not Available]	#N/A	#N/A	#N/A	#N/A	[Not Available]	Negative	#N/A	0	426	0	426	0	426	0	426
690	TCGA-A8-A07J	BRCA	35	FEMALE	[Not Available]	Stage IIB	[Not Applicable]	Infiltrating Ductal Carcinoma	[Not Available]	2009	Pre (<6 months since LMP AND no prior bilateral ovariectomy AND not on estrogen replacement)	-12965	Alive	TUMOR FREE	365	#N/A	[Not Available]	#N/A	#N/A	#N/A	#N/A	[Not Available]	Negative	#N/A	0	365	0	365	0	365	0	365
691	TCGA-A8-A07L	BRCA	58	FEMALE	[Not Available]	Stage IIIA	[Not Applicable]	Infiltrating Ductal Carcinoma	[Not Available]	2009	Post (prior bilateral ovariectomy OR >12 mo since LMP with no prior hysterectomy)	-21428	Alive	TUMOR FREE	975	#N/A	[Not Available]	#N/A	#N/A	#N/A	#N/A	[Not Available]	Negative	#N/A	0	975	0	975	0	975	0	975
692	TCGA-A8-A07O	BRCA	51	FEMALE	[Not Available]	Stage IIA	[Not Applicable]	Infiltrating Ductal Carcinoma	[Not Available]	2009	Post (prior bilateral ovariectomy OR >12 mo since LMP with no prior hysterectomy)	-18870	Alive	TUMOR FREE	304	#N/A	[Not Available]	#N/A	#N/A	#N/A	#N/A	[Not Available]	Negative	#N/A	0	304	0	304	0	304	0	304
693	TCGA-A8-A07P	BRCA	68	FEMALE	[Not Available]	Stage IIB	[Not Applicable]	Infiltrating Ductal Carcinoma	[Not Available]	2009	Post (prior bilateral ovariectomy OR >12 mo since LMP with no prior hysterectomy)	-24929	Alive	TUMOR FREE	334	#N/A	[Not Available]	#N/A	#N/A	#N/A	#N/A	[Not Available]	Negative	#N/A	0	334	0	334	0	334	0	334
694	TCGA-A8-A07R	BRCA	80	FEMALE	[Not Available]	Stage IIIC	[Not Applicable]	Infiltrating Ductal Carcinoma	[Not Available]	2009	[Not Available]	-29251	Alive	#N/A	273	#N/A	[Not Available]	#N/A	#N/A	#N/A	#N/A	[Not Available]	Positive	#N/A	0	273	0	273	#N/A	#N/A	0	273
695	TCGA-A8-A07S	BRCA	73	FEMALE	[Not Available]	Stage IIA	[Not Applicable]	Mixed Histology (please specify)	[Not Available]	2009	Post (prior bilateral ovariectomy OR >12 mo since LMP with no prior hysterectomy)	-26998	Alive	WITH TUMOR	243	#N/A	[Not Available]	#N/A	#N/A	#N/A	#N/A	[Not Available]	Positive	#N/A	0	243	0	243	#N/A	#N/A	0	243
696	TCGA-A8-A07U	BRCA	66	FEMALE	[Not Available]	Stage IIIA	[Not Applicable]	Infiltrating Ductal Carcinoma	[Not Available]	2009	Post (prior bilateral ovariectomy OR >12 mo since LMP with no prior hysterectomy)	-24411	Alive	TUMOR FREE	760	#N/A	[Not Available]	#N/A	#N/A	#N/A	#N/A	[Not Available]	Negative	#N/A	0	760	0	760	0	760	0	760
697	TCGA-A8-A07W	BRCA	76	FEMALE	[Not Available]	Stage IV	[Not Applicable]	Infiltrating Ductal Carcinoma	[Not Available]	2009	Post (prior bilateral ovariectomy OR >12 mo since LMP with no prior hysterectomy)	-27942	Alive	WITH TUMOR	304	#N/A	[Not Available]	#N/A	#N/A	#N/A	#N/A	[Not Available]	Positive	#N/A	0	304	0	304	#N/A	#N/A	0	304
698	TCGA-A8-A07Z	BRCA	85	FEMALE	[Not Available]	Stage IIA	[Not Applicable]	Infiltrating Ductal Carcinoma	[Not Available]	2008	Post (prior bilateral ovariectomy OR >12 mo since LMP with no prior hysterectomy)	-31351	Alive	TUMOR FREE	1371	#N/A	[Not Available]	#N/A	#N/A	#N/A	#N/A	[Not Available]	Negative	#N/A	0	1371	0	1371	0	1371	0	1371
699	TCGA-A8-A081	BRCA	80	FEMALE	[Not Available]	Stage IIA	[Not Applicable]	Infiltrating Ductal Carcinoma	[Not Available]	2008	Post (prior bilateral ovariectomy OR >12 mo since LMP with no prior hysterectomy)	-29555	Alive	TUMOR FREE	0	#N/A	[Not Available]	#N/A	#N/A	#N/A	#N/A	[Not Available]	Negative	#N/A	0	0	0	0	0	0	0	0
700	TCGA-A8-A082	BRCA	58	FEMALE	[Not Available]	Stage IIB	[Not Applicable]	Infiltrating Ductal Carcinoma	[Not Available]	2008	Post (prior bilateral ovariectomy OR >12 mo since LMP with no prior hysterectomy)	-21338	Alive	TUMOR FREE	549	#N/A	[Not Available]	#N/A	#N/A	#N/A	#N/A	[Not Available]	Negative	#N/A	0	549	0	549	0	549	0	549
701	TCGA-A8-A083	BRCA	67	FEMALE	[Not Available]	Stage IIB	[Not Applicable]	Infiltrating Ductal Carcinoma	[Not Available]	2008	Post (prior bilateral ovariectomy OR >12 mo since LMP with no prior hysterectomy)	-24746	Alive	TUMOR FREE	0	#N/A	[Not Available]	#N/A	#N/A	#N/A	#N/A	[Not Available]	Negative	#N/A	0	0	0	0	0	0	0	0
702	TCGA-A8-A084	BRCA	81	FEMALE	[Not Available]	Stage IIB	[Not Applicable]	Infiltrating Ductal Carcinoma	[Not Available]	2007	Post (prior bilateral ovariectomy OR >12 mo since LMP with no prior hysterectomy)	-29858	Alive	WITH TUMOR	458	#N/A	[Not Available]	#N/A	#N/A	#N/A	#N/A	[Not Available]	Positive	#N/A	0	458	0	458	#N/A	#N/A	0	458
703	TCGA-A8-A085	BRCA	44	MALE	[Not Available]	Stage IIB	[Not Applicable]	Infiltrating Ductal Carcinoma	[Not Available]	2008	[Not Available]	-16377	Alive	TUMOR FREE	1124	#N/A	[Not Available]	#N/A	#N/A	#N/A	#N/A	[Not Available]	Negative	#N/A	0	1124	0	1124	0	1124	0	1124
704	TCGA-A8-A086	BRCA	59	FEMALE	[Not Available]	Stage IIA	[Not Applicable]	Infiltrating Ductal Carcinoma	[Not Available]	2009	Post (prior bilateral ovariectomy OR >12 mo since LMP with no prior hysterectomy)	-21731	Alive	TUMOR FREE	396	#N/A	[Not Available]	#N/A	#N/A	#N/A	#N/A	[Not Available]	Negative	#N/A	0	396	0	396	0	396	0	396
705	TCGA-A8-A08A	BRCA	89	FEMALE	[Not Available]	Stage I	[Not Applicable]	Infiltrating Ductal Carcinoma	[Not Available]	2007	Post (prior bilateral ovariectomy OR >12 mo since LMP with no prior hysterectomy)	-32750	Alive	TUMOR FREE	30	#N/A	[Not Available]	#N/A	#N/A	#N/A	#N/A	[Not Available]	Negative	#N/A	0	30	0	30	0	30	0	30
706	TCGA-A8-A08B	BRCA	52	FEMALE	[Not Available]	Stage IIA	[Not Applicable]	Infiltrating Ductal Carcinoma	[Not Available]	2008	Pre (<6 months since LMP AND no prior bilateral ovariectomy AND not on estrogen replacement)	-19114	Alive	TUMOR FREE	1156	#N/A	[Not Available]	#N/A	#N/A	#N/A	#N/A	[Not Available]	Negative	#N/A	0	1156	0	1156	0	1156	0	1156
707	TCGA-A8-A08C	BRCA	65	FEMALE	[Not Available]	Stage IIA	[Not Applicable]	Infiltrating Ductal Carcinoma	[Not Available]	2008	Post (prior bilateral ovariectomy OR >12 mo since LMP with no prior hysterectomy)	-24017	Alive	TUMOR FREE	881	#N/A	[Not Available]	#N/A	#N/A	#N/A	#N/A	[Not Available]	Negative	#N/A	0	881	0	881	0	881	0	881
708	TCGA-A8-A08F	BRCA	59	FEMALE	[Not Available]	Stage IIIC	[Not Applicable]	Infiltrating Ductal Carcinoma	[Not Available]	2008	Post (prior bilateral ovariectomy OR >12 mo since LMP with no prior hysterectomy)	-21641	Alive	TUMOR FREE	1004	#N/A	[Not Available]	#N/A	#N/A	#N/A	#N/A	[Not Available]	Negative	#N/A	0	1004	0	1004	0	1004	0	1004
709	TCGA-A8-A08G	BRCA	41	FEMALE	[Not Available]	Stage IIA	[Not Applicable]	Infiltrating Ductal Carcinoma	[Not Available]	2009	Pre (<6 months since LMP AND no prior bilateral ovariectomy AND not on estrogen replacement)	-14976	Alive	TUMOR FREE	607	#N/A	[Not Available]	#N/A	#N/A	#N/A	#N/A	[Not Available]	Negative	#N/A	0	607	0	607	0	607	0	607
710	TCGA-A8-A08H	BRCA	66	FEMALE	[Not Available]	Stage IIA	[Not Applicable]	Infiltrating Ductal Carcinoma	[Not Available]	2007	Post (prior bilateral ovariectomy OR >12 mo since LMP with no prior hysterectomy)	-24137	Alive	TUMOR FREE	0	#N/A	[Not Available]	#N/A	#N/A	#N/A	#N/A	[Not Available]	Negative	#N/A	0	0	0	0	0	0	0	0
711	TCGA-A8-A08I	BRCA	53	FEMALE	[Not Available]	Stage IIA	[Not Applicable]	Infiltrating Ductal Carcinoma	[Not Available]	2009	Post (prior bilateral ovariectomy OR >12 mo since LMP with no prior hysterectomy)	-19389	Alive	TUMOR FREE	365	#N/A	[Not Available]	#N/A	#N/A	#N/A	#N/A	[Not Available]	Negative	#N/A	0	365	0	365	0	365	0	365
712	TCGA-A8-A08J	BRCA	52	FEMALE	[Not Available]	Stage IV	[Not Applicable]	Infiltrating Ductal Carcinoma	[Not Available]	2005	Post (prior bilateral ovariectomy OR >12 mo since LMP with no prior hysterectomy)	-19266	Dead	WITH TUMOR	#N/A	1127	[Not Available]	#N/A	#N/A	#N/A	#N/A	[Not Available]	Positive	#N/A	1	1127	1	1127	#N/A	#N/A	1	1127
713	TCGA-A8-A08L	BRCA	89	FEMALE	[Not Available]	Stage IIIA	[Not Applicable]	Infiltrating Ductal Carcinoma	[Not Available]	2008	Post (prior bilateral ovariectomy OR >12 mo since LMP with no prior hysterectomy)	-32842	Dead	TUMOR FREE	#N/A	304	[Not Available]	#N/A	#N/A	#N/A	#N/A	[Not Available]	Negative	#N/A	1	304	0	304	0	304	0	304
714	TCGA-A8-A08O	BRCA	45	FEMALE	[Not Available]	Stage IV	[Not Applicable]	Infiltrating Ductal Carcinoma	[Not Available]	2008	Pre (<6 months since LMP AND no prior bilateral ovariectomy AND not on estrogen replacement)	-16681	Alive	WITH TUMOR	943	#N/A	[Not Available]	#N/A	#N/A	#N/A	762	[Not Available]	Positive	#N/A	0	943	0	943	#N/A	#N/A	1	762
715	TCGA-A8-A08P	BRCA	70	FEMALE	[Not Available]	Stage IIIA	[Not Applicable]	Infiltrating Ductal Carcinoma	[Not Available]	2008	Post (prior bilateral ovariectomy OR >12 mo since LMP with no prior hysterectomy)	-25598	Alive	TUMOR FREE	943	#N/A	[Not Available]	#N/A	#N/A	#N/A	#N/A	[Not Available]	Negative	#N/A	0	943	0	943	0	943	0	943
716	TCGA-A8-A08R	BRCA	52	FEMALE	[Not Available]	Stage IIB	[Not Applicable]	Infiltrating Ductal Carcinoma	[Not Available]	2008	Post (prior bilateral ovariectomy OR >12 mo since LMP with no prior hysterectomy)	-19298	Alive	TUMOR FREE	30	#N/A	[Not Available]	#N/A	#N/A	#N/A	#N/A	[Not Available]	Negative	#N/A	0	30	0	30	0	30	0	30
717	TCGA-A8-A08S	BRCA	71	FEMALE	[Not Available]	Stage IIA	[Not Applicable]	Infiltrating Ductal Carcinoma	[Not Available]	2008	Post (prior bilateral ovariectomy OR >12 mo since LMP with no prior hysterectomy)	-25994	Alive	TUMOR FREE	1004	#N/A	[Not Available]	#N/A	#N/A	#N/A	#N/A	[Not Available]	Negative	#N/A	0	1004	0	1004	0	1004	0	1004
718	TCGA-A8-A08T	BRCA	64	FEMALE	[Not Available]	Stage IV	[Not Applicable]	Infiltrating Ductal Carcinoma	[Not Available]	2002	Post (prior bilateral ovariectomy OR >12 mo since LMP with no prior hysterectomy)	-23560	Dead	WITH TUMOR	#N/A	3409	[Not Available]	#N/A	#N/A	#N/A	2557	[Not Available]	Positive	#N/A	1	3409	1	3409	#N/A	#N/A	1	2557
719	TCGA-A8-A08X	BRCA	43	FEMALE	[Not Available]	Stage IIIC	[Not Applicable]	Infiltrating Ductal Carcinoma	[Not Available]	2007	Pre (<6 months since LMP AND no prior bilateral ovariectomy AND not on estrogen replacement)	-15705	Alive	TUMOR FREE	1308	#N/A	[Not Available]	#N/A	#N/A	#N/A	366	[Not Available]	Negative	#N/A	0	1308	0	1308	1	366	1	366
720	TCGA-A8-A08Z	BRCA	76	FEMALE	[Not Available]	[Discrepancy]	[Not Applicable]	Infiltrating Ductal Carcinoma	[Not Available]	2004	Post (prior bilateral ovariectomy OR >12 mo since LMP with no prior hysterectomy)	-28003	Alive	TUMOR FREE	1217	#N/A	[Not Available]	#N/A	#N/A	#N/A	#N/A	[Not Available]	Negative	#N/A	0	1217	0	1217	0	1217	0	1217
721	TCGA-A8-A090	BRCA	74	FEMALE	[Not Available]	Stage IIA	[Not Applicable]	Infiltrating Ductal Carcinoma	[Not Available]	2008	Post (prior bilateral ovariectomy OR >12 mo since LMP with no prior hysterectomy)	-27121	Alive	TUMOR FREE	0	#N/A	[Not Available]	#N/A	#N/A	#N/A	#N/A	[Not Available]	Negative	#N/A	0	0	0	0	0	0	0	0
722	TCGA-A8-A091	BRCA	61	FEMALE	[Not Available]	Stage IIA	[Not Applicable]	Infiltrating Ductal Carcinoma	[Not Available]	2008	Post (prior bilateral ovariectomy OR >12 mo since LMP with no prior hysterectomy)	-22554	Alive	TUMOR FREE	1004	#N/A	[Not Available]	#N/A	#N/A	#N/A	243	[Not Available]	Negative	#N/A	0	1004	0	1004	1	243	1	243
723	TCGA-A8-A092	BRCA	48	FEMALE	[Not Available]	Stage IIIA	[Not Applicable]	Infiltrating Ductal Carcinoma	[Not Available]	2008	Pre (<6 months since LMP AND no prior bilateral ovariectomy AND not on estrogen replacement)	-17807	Alive	TUMOR FREE	942	#N/A	[Not Available]	#N/A	#N/A	#N/A	#N/A	[Not Available]	Negative	#N/A	0	942	0	942	0	942	0	942
724	TCGA-A8-A093	BRCA	61	FEMALE	[Not Available]	Stage IIA	[Not Applicable]	Infiltrating Ductal Carcinoma	[Not Available]	2009	Post (prior bilateral ovariectomy OR >12 mo since LMP with no prior hysterectomy)	-22373	Alive	TUMOR FREE	546	#N/A	[Not Available]	#N/A	#N/A	#N/A	#N/A	[Not Available]	Negative	#N/A	0	546	0	546	0	546	0	546
725	TCGA-A8-A094	BRCA	75	FEMALE	[Not Available]	Stage IIA	[Not Applicable]	Infiltrating Ductal Carcinoma	[Not Available]	2009	Post (prior bilateral ovariectomy OR >12 mo since LMP with no prior hysterectomy)	-27729	Alive	TUMOR FREE	0	#N/A	[Not Available]	#N/A	#N/A	#N/A	#N/A	[Not Available]	Negative	#N/A	0	0	0	0	0	0	0	0
726	TCGA-A8-A095	BRCA	45	FEMALE	[Not Available]	Stage I	[Not Applicable]	Infiltrating Ductal Carcinoma	[Not Available]	2007	Pre (<6 months since LMP AND no prior bilateral ovariectomy AND not on estrogen replacement)	-16742	Alive	TUMOR FREE	1277	#N/A	[Not Available]	#N/A	#N/A	#N/A	#N/A	[Not Available]	Negative	#N/A	0	1277	0	1277	0	1277	0	1277
727	TCGA-A8-A096	BRCA	73	FEMALE	[Not Available]	Stage IIA	[Not Applicable]	Infiltrating Ductal Carcinoma	[Not Available]	2009	Post (prior bilateral ovariectomy OR >12 mo since LMP with no prior hysterectomy)	-26723	Alive	TUMOR FREE	0	#N/A	[Not Available]	#N/A	#N/A	#N/A	#N/A	[Not Available]	Negative	#N/A	0	0	0	0	0	0	0	0
728	TCGA-A8-A097	BRCA	65	FEMALE	[Not Available]	Stage IIB	[Not Applicable]	Infiltrating Ductal Carcinoma	[Not Available]	2009	Post (prior bilateral ovariectomy OR >12 mo since LMP with no prior hysterectomy)	-23741	Alive	TUMOR FREE	365	#N/A	[Not Available]	#N/A	#N/A	#N/A	#N/A	[Not Available]	Negative	#N/A	0	365	0	365	0	365	0	365
729	TCGA-A8-A099	BRCA	76	FEMALE	[Not Available]	Stage X	[Not Applicable]	Infiltrating Ductal Carcinoma	[Not Available]	2009	Post (prior bilateral ovariectomy OR >12 mo since LMP with no prior hysterectomy)	-28063	Alive	#N/A	304	#N/A	[Not Available]	#N/A	#N/A	#N/A	#N/A	[Not Available]	[Not Available]	#N/A	0	304	0	304	#N/A	#N/A	0	304
730	TCGA-A8-A09A	BRCA	40	FEMALE	[Not Available]	Stage X	[Not Applicable]	Infiltrating Ductal Carcinoma	[Not Available]	2009	Pre (<6 months since LMP AND no prior bilateral ovariectomy AND not on estrogen replacement)	-14883	Alive	WITH TUMOR	304	#N/A	[Not Available]	#N/A	#N/A	#N/A	#N/A	[Not Available]	Positive	#N/A	0	304	0	304	#N/A	#N/A	0	304
731	TCGA-A8-A09B	BRCA	58	FEMALE	[Not Available]	Stage IIIB	[Not Applicable]	Infiltrating Ductal Carcinoma	[Not Available]	2009	Post (prior bilateral ovariectomy OR >12 mo since LMP with no prior hysterectomy)	-21520	Alive	TUMOR FREE	365	#N/A	[Not Available]	#N/A	#N/A	#N/A	#N/A	[Not Available]	Negative	#N/A	0	365	0	365	0	365	0	365
732	TCGA-A8-A09C	BRCA	69	FEMALE	[Not Available]	Stage X	[Not Applicable]	Infiltrating Ductal Carcinoma	[Not Available]	2009	Post (prior bilateral ovariectomy OR >12 mo since LMP with no prior hysterectomy)	-25355	Alive	#N/A	31	#N/A	[Not Available]	#N/A	#N/A	#N/A	#N/A	[Not Available]	[Not Available]	#N/A	0	31	0	31	#N/A	#N/A	0	31
733	TCGA-A8-A09D	BRCA	47	FEMALE	[Not Available]	Stage IIB	[Not Applicable]	Infiltrating Ductal Carcinoma	[Not Available]	2007	Post (prior bilateral ovariectomy OR >12 mo since LMP with no prior hysterectomy)	-17440	Alive	TUMOR FREE	1522	#N/A	[Not Available]	#N/A	#N/A	#N/A	#N/A	[Not Available]	Negative	#N/A	0	1522	0	1522	0	1522	0	1522
734	TCGA-A8-A09E	BRCA	73	FEMALE	[Not Available]	Stage IIIB	[Not Applicable]	Infiltrating Ductal Carcinoma	[Not Available]	2008	Post (prior bilateral ovariectomy OR >12 mo since LMP with no prior hysterectomy)	-26724	Alive	WITH TUMOR	1492	#N/A	[Not Available]	#N/A	#N/A	#N/A	#N/A	[Not Available]	Positive	#N/A	0	1492	0	1492	#N/A	#N/A	0	1492
735	TCGA-A8-A09G	BRCA	79	FEMALE	[Not Available]	Stage IIIC	[Not Applicable]	Infiltrating Ductal Carcinoma	[Not Available]	2008	Post (prior bilateral ovariectomy OR >12 mo since LMP with no prior hysterectomy)	-29006	Alive	TUMOR FREE	0	#N/A	[Not Available]	#N/A	#N/A	#N/A	#N/A	[Not Available]	Negative	#N/A	0	0	0	0	0	0	0	0
736	TCGA-A8-A09I	BRCA	84	FEMALE	[Not Available]	Stage IIA	[Not Applicable]	Infiltrating Ductal Carcinoma	[Not Available]	2008	Post (prior bilateral ovariectomy OR >12 mo since LMP with no prior hysterectomy)	-30711	Alive	TUMOR FREE	1371	#N/A	[Not Available]	#N/A	#N/A	#N/A	#N/A	[Not Available]	Negative	#N/A	0	1371	0	1371	0	1371	0	1371
737	TCGA-A8-A09K	BRCA	68	FEMALE	[Not Available]	Stage IIA	[Not Applicable]	Infiltrating Ductal Carcinoma	[Not Available]	2008	Post (prior bilateral ovariectomy OR >12 mo since LMP with no prior hysterectomy)	-24960	Alive	TUMOR FREE	912	#N/A	[Not Available]	#N/A	#N/A	#N/A	#N/A	[Not Available]	Negative	#N/A	0	912	0	912	0	912	0	912
738	TCGA-A8-A09M	BRCA	75	FEMALE	[Not Available]	Stage IIIC	[Not Applicable]	Infiltrating Ductal Carcinoma	[Not Available]	2009	Post (prior bilateral ovariectomy OR >12 mo since LMP with no prior hysterectomy)	-27455	Alive	TUMOR FREE	1006	#N/A	[Not Available]	#N/A	#N/A	#N/A	#N/A	[Not Available]	Negative	#N/A	0	1006	0	1006	0	1006	0	1006
739	TCGA-A8-A09N	BRCA	57	FEMALE	[Not Available]	Stage IIIC	[Not Applicable]	Infiltrating Ductal Carcinoma	[Not Available]	2006	Post (prior bilateral ovariectomy OR >12 mo since LMP with no prior hysterectomy)	-21002	Alive	TUMOR FREE	31	#N/A	[Not Available]	#N/A	#N/A	#N/A	#N/A	[Not Available]	Negative	#N/A	0	31	0	31	0	31	0	31
740	TCGA-A8-A09Q	BRCA	83	FEMALE	[Not Available]	Stage IIIB	[Not Applicable]	Infiltrating Ductal Carcinoma	[Not Available]	2008	Post (prior bilateral ovariectomy OR >12 mo since LMP with no prior hysterectomy)	-30528	Alive	WITH TUMOR	761	#N/A	[Not Available]	#N/A	#N/A	#N/A	#N/A	[Not Available]	Positive	#N/A	0	761	0	761	#N/A	#N/A	0	761
741	TCGA-A8-A09R	BRCA	82	FEMALE	[Not Available]	Stage IIB	[Not Applicable]	Infiltrating Ductal Carcinoma	[Not Available]	2009	Post (prior bilateral ovariectomy OR >12 mo since LMP with no prior hysterectomy)	-30196	Alive	TUMOR FREE	273	#N/A	[Not Available]	#N/A	#N/A	#N/A	#N/A	[Not Available]	Negative	#N/A	0	273	0	273	0	273	0	273
742	TCGA-A8-A09T	BRCA	68	FEMALE	[Not Available]	[Discrepancy]	[Not Applicable]	Infiltrating Lobular Carcinoma	[Not Available]	2009	Post (prior bilateral ovariectomy OR >12 mo since LMP with no prior hysterectomy)	-25110	Alive	TUMOR FREE	579	#N/A	[Not Available]	#N/A	#N/A	#N/A	#N/A	[Not Available]	Negative	#N/A	0	579	0	579	0	579	0	579
743	TCGA-A8-A09V	BRCA	51	FEMALE	[Not Available]	Stage IIA	[Not Applicable]	Infiltrating Lobular Carcinoma	[Not Available]	2009	Pre (<6 months since LMP AND no prior bilateral ovariectomy AND not on estrogen replacement)	-18628	Alive	TUMOR FREE	457	#N/A	[Not Available]	#N/A	#N/A	#N/A	#N/A	[Not Available]	Negative	#N/A	0	457	0	457	0	457	0	457
744	TCGA-A8-A09W	BRCA	70	FEMALE	[Not Available]	Stage IIIB	[Not Applicable]	Infiltrating Lobular Carcinoma	[Not Available]	2007	Post (prior bilateral ovariectomy OR >12 mo since LMP with no prior hysterectomy)	-25659	Alive	#N/A	30	#N/A	[Not Available]	#N/A	#N/A	#N/A	#N/A	[Not Available]	[Not Available]	#N/A	0	30	0	30	#N/A	#N/A	0	30
745	TCGA-A8-A09X	BRCA	62	FEMALE	[Not Available]	Stage IIIC	[Not Applicable]	Infiltrating Lobular Carcinoma	[Not Available]	2009	Post (prior bilateral ovariectomy OR >12 mo since LMP with no prior hysterectomy)	-22858	Dead	#N/A	#N/A	426	[Not Available]	#N/A	#N/A	#N/A	#N/A	[Not Available]	[Not Available]	#N/A	1	426	#N/A	426	#N/A	#N/A	0	426
746	TCGA-A8-A09Z	BRCA	83	FEMALE	[Not Available]	Stage IIB	[Not Applicable]	Infiltrating Lobular Carcinoma	[Not Available]	2008	Post (prior bilateral ovariectomy OR >12 mo since LMP with no prior hysterectomy)	-30590	Alive	WITH TUMOR	0	#N/A	[Not Available]	#N/A	#N/A	#N/A	#N/A	[Not Available]	Positive	#N/A	0	0	0	0	#N/A	#N/A	0	0
747	TCGA-A8-A0A1	BRCA	84	FEMALE	[Not Available]	Stage IIA	[Not Applicable]	Infiltrating Lobular Carcinoma	[Not Available]	2009	Post (prior bilateral ovariectomy OR >12 mo since LMP with no prior hysterectomy)	-30742	Alive	TUMOR FREE	365	#N/A	[Not Available]	#N/A	#N/A	#N/A	#N/A	[Not Available]	Negative	#N/A	0	365	0	365	0	365	0	365
748	TCGA-A8-A0A2	BRCA	66	FEMALE	[Not Available]	Stage IIA	[Not Applicable]	Infiltrating Lobular Carcinoma	[Not Available]	2009	Post (prior bilateral ovariectomy OR >12 mo since LMP with no prior hysterectomy)	-24380	Alive	TUMOR FREE	579	#N/A	[Not Available]	#N/A	#N/A	#N/A	#N/A	[Not Available]	Negative	#N/A	0	579	0	579	0	579	0	579
749	TCGA-A8-A0A4	BRCA	73	FEMALE	[Not Available]	Stage IIA	[Not Applicable]	Infiltrating Lobular Carcinoma	[Not Available]	2009	Post (prior bilateral ovariectomy OR >12 mo since LMP with no prior hysterectomy)	-26693	Alive	TUMOR FREE	396	#N/A	[Not Available]	#N/A	#N/A	#N/A	#N/A	[Not Available]	Negative	#N/A	0	396	0	396	0	396	0	396
750	TCGA-A8-A0A6	BRCA	64	FEMALE	[Not Available]	Stage IIIC	[Not Applicable]	Infiltrating Lobular Carcinoma	[Not Available]	2009	Post (prior bilateral ovariectomy OR >12 mo since LMP with no prior hysterectomy)	-23404	Alive	TUMOR FREE	640	#N/A	[Not Available]	#N/A	#N/A	#N/A	#N/A	[Not Available]	Negative	#N/A	0	640	0	640	0	640	0	640
751	TCGA-A8-A0A7	BRCA	57	FEMALE	[Not Available]	Stage IIB	[Not Applicable]	Infiltrating Lobular Carcinoma	[Not Available]	2009	Post (prior bilateral ovariectomy OR >12 mo since LMP with no prior hysterectomy)	-20940	Alive	TUMOR FREE	30	#N/A	[Not Available]	#N/A	#N/A	#N/A	#N/A	[Not Available]	Negative	#N/A	0	30	0	30	0	30	0	30
752	TCGA-A8-A0A9	BRCA	80	FEMALE	[Not Available]	Stage IIA	[Not Applicable]	Infiltrating Ductal Carcinoma	[Not Available]	2009	Post (prior bilateral ovariectomy OR >12 mo since LMP with no prior hysterectomy)	-29370	Alive	TUMOR FREE	822	#N/A	[Not Available]	#N/A	#N/A	#N/A	#N/A	[Not Available]	Negative	#N/A	0	822	0	822	0	822	0	822
753	TCGA-A8-A0AB	BRCA	54	FEMALE	[Not Available]	Stage IIA	[Not Applicable]	Infiltrating Lobular Carcinoma	[Not Available]	2009	Post (prior bilateral ovariectomy OR >12 mo since LMP with no prior hysterectomy)	-19814	Alive	TUMOR FREE	518	#N/A	[Not Available]	#N/A	#N/A	#N/A	#N/A	[Not Available]	Negative	#N/A	0	518	0	518	0	518	0	518
754	TCGA-A8-A0AD	BRCA	83	FEMALE	[Not Available]	Stage I	[Not Applicable]	Mixed Histology (please specify)	[Not Available]	2007	Post (prior bilateral ovariectomy OR >12 mo since LMP with no prior hysterectomy)	-30407	Alive	TUMOR FREE	1157	#N/A	[Not Available]	#N/A	#N/A	#N/A	#N/A	[Not Available]	Negative	#N/A	0	1157	0	1157	0	1157	0	1157
755	TCGA-AC-A23C	BRCA	62	FEMALE	WHITE	Stage IIB	[Not Applicable]	Infiltrating Ductal Carcinoma	[Not Available]	2010	Post (prior bilateral ovariectomy OR >12 mo since LMP with no prior hysterectomy)	-22751	Alive	TUMOR FREE	585	#N/A	[Not Available]	#N/A	#N/A	#N/A	#N/A	[Not Available]	Negative	#N/A	0	585	0	585	0	585	0	585
756	TCGA-AC-A23E	BRCA	50	FEMALE	WHITE	Stage IIB	[Not Applicable]	Infiltrating Ductal Carcinoma	[Not Available]	2010	[Not Available]	-18500	Alive	TUMOR FREE	698	#N/A	[Not Available]	#N/A	#N/A	#N/A	#N/A	[Not Available]	Negative	#N/A	0	698	0	698	0	698	0	698
757	TCGA-AC-A23G	BRCA	76	FEMALE	WHITE	Stage IIA	[Not Applicable]	Infiltrating Lobular Carcinoma	[Not Available]	2006	Post (prior bilateral ovariectomy OR >12 mo since LMP with no prior hysterectomy)	-27934	Alive	TUMOR FREE	2248	#N/A	[Not Available]	#N/A	#N/A	#N/A	#N/A	[Not Available]	Negative	#N/A	0	2248	0	2248	0	2248	0	2248
758	TCGA-AC-A23H	BRCA	90	FEMALE	WHITE	Stage IIA	[Not Applicable]	Infiltrating Ductal Carcinoma	[Not Available]	2009	Post (prior bilateral ovariectomy OR >12 mo since LMP with no prior hysterectomy)	-32873	Dead	WITH TUMOR	#N/A	174	[Not Available]	#N/A	#N/A	#N/A	#N/A	[Not Available]	Negative	#N/A	1	174	1	174	#N/A	#N/A	1	174
759	TCGA-AC-A2B8	BRCA	84	FEMALE	WHITE	Stage IIB	[Not Applicable]	Infiltrating Lobular Carcinoma	[Not Available]	2011	Post (prior bilateral ovariectomy OR >12 mo since LMP with no prior hysterectomy)	-31003	Alive	TUMOR FREE	677	#N/A	[Not Available]	New Primary Tumor	Other, specify	Rectum	654	[Not Available]	Negative	#N/A	0	677	0	677	0	677	1	654
760	TCGA-AC-A2BK	BRCA	78	FEMALE	BLACK OR AFRICAN AMERICAN	Stage IIIA	[Not Applicable]	Infiltrating Ductal Carcinoma	[Not Available]	2006	Post (prior bilateral ovariectomy OR >12 mo since LMP with no prior hysterectomy)	-28625	Alive	TUMOR FREE	2222	#N/A	[Not Available]	#N/A	#N/A	#N/A	#N/A	[Not Available]	Negative	#N/A	0	2222	0	2222	0	2222	0	2222
761	TCGA-AC-A2BM	BRCA	41	FEMALE	BLACK OR AFRICAN AMERICAN	Stage IIB	[Not Applicable]	Infiltrating Ductal Carcinoma	[Not Available]	2005	[Not Available]	-15212	Alive	TUMOR FREE	3022	#N/A	[Not Available]	#N/A	#N/A	#N/A	#N/A	[Not Available]	Negative	#N/A	0	3022	0	3022	0	3022	0	3022
762	TCGA-AC-A2FB	BRCA	65	FEMALE	WHITE	Stage IIA	[Not Applicable]	Infiltrating Lobular Carcinoma	[Not Available]	2009	[Not Available]	-23851	Alive	TUMOR FREE	1234	#N/A	[Not Available]	#N/A	#N/A	#N/A	#N/A	[Not Available]	Negative	#N/A	0	1234	0	1234	0	1234	0	1234
763	TCGA-AC-A2FE	BRCA	62	FEMALE	WHITE	Stage IIIC	[Not Applicable]	Infiltrating Lobular Carcinoma	[Not Available]	2005	Post (prior bilateral ovariectomy OR >12 mo since LMP with no prior hysterectomy)	-22746	Dead	WITH TUMOR	#N/A	2636	[Not Available]	Distant Metastasis	Bone	#N/A	766	[Not Available]	Negative	#N/A	1	2636	1	2636	1	766	1	766
764	TCGA-AC-A2FF	BRCA	40	FEMALE	ASIAN	Stage IIB	[Not Applicable]	Infiltrating Lobular Carcinoma	[Not Available]	2006	[Not Available]	#N/A	Alive	TUMOR FREE	2759	#N/A	[Not Available]	#N/A	#N/A	#N/A	#N/A	[Not Available]	Negative	#N/A	0	2759	0	2759	0	2759	0	2759
765	TCGA-AC-A2FG	BRCA	79	FEMALE	WHITE	Stage IIB	[Not Applicable]	Infiltrating Lobular Carcinoma	[Not Available]	2007	Post (prior bilateral ovariectomy OR >12 mo since LMP with no prior hysterectomy)	-29211	Alive	TUMOR FREE	1853	#N/A	[Not Available]	#N/A	#N/A	#N/A	#N/A	[Not Available]	Negative	#N/A	0	1853	0	1853	0	1853	0	1853
766	TCGA-AC-A2FK	BRCA	45	FEMALE	WHITE	Stage IIIC	[Not Applicable]	Infiltrating Lobular Carcinoma	[Not Available]	2006	[Not Available]	-16627	Alive	TUMOR FREE	2650	#N/A	[Not Available]	#N/A	#N/A	#N/A	#N/A	[Not Available]	Negative	#N/A	0	2650	0	2650	0	2650	0	2650
767	TCGA-AC-A2FM	BRCA	87	FEMALE	WHITE	Stage IIB	[Not Applicable]	Infiltrating Lobular Carcinoma	[Not Available]	2004	Post (prior bilateral ovariectomy OR >12 mo since LMP with no prior hysterectomy)	-31805	Dead	WITH TUMOR	#N/A	792	[Not Available]	Distant Metastasis	Other, specify	Bone Marrow	780	[Not Available]	Negative	#N/A	1	792	1	792	1	780	1	780
768	TCGA-AC-A2FO	BRCA	65	FEMALE	WHITE	Stage IIB	[Not Applicable]	Infiltrating Lobular Carcinoma	[Not Available]	2005	Post (prior bilateral ovariectomy OR >12 mo since LMP with no prior hysterectomy)	-23928	Alive	TUMOR FREE	2255	#N/A	[Not Available]	#N/A	#N/A	#N/A	#N/A	[Not Available]	Negative	#N/A	0	2255	0	2255	0	2255	0	2255
769	TCGA-AC-A2QH	BRCA	58	FEMALE	WHITE	Stage IIB	[Not Applicable]	Metaplastic Carcinoma	[Not Available]	2011	Post (prior bilateral ovariectomy OR >12 mo since LMP with no prior hysterectomy)	-21488	Alive	TUMOR FREE	1005	#N/A	[Not Available]	#N/A	#N/A	#N/A	#N/A	[Not Available]	Negative	#N/A	0	1005	0	1005	0	1005	0	1005
770	TCGA-AC-A2QI	BRCA	76	FEMALE	WHITE	Stage IIIA	[Not Applicable]	Infiltrating Lobular Carcinoma	[Not Available]	2011	Post (prior bilateral ovariectomy OR >12 mo since LMP with no prior hysterectomy)	-27865	Alive	TUMOR FREE	588	#N/A	[Not Available]	#N/A	#N/A	#N/A	#N/A	[Not Available]	Negative	#N/A	0	588	0	588	0	588	0	588
771	TCGA-AC-A2QJ	BRCA	48	FEMALE	WHITE	Stage IIIB	[Not Applicable]	Metaplastic Carcinoma	[Not Available]	2011	Peri (6-12 months since last menstrual period)	-17569	Dead	WITH TUMOR	#N/A	446	[Not Available]	Distant Metastasis	Bone	#N/A	237	[Not Available]	Negative	#N/A	1	446	1	446	1	237	1	237
772	TCGA-AC-A3BB	BRCA	46	FEMALE	BLACK OR AFRICAN AMERICAN	Stage IIIA	[Not Applicable]	Infiltrating Lobular Carcinoma	[Not Available]	2011	[Not Available]	-16983	Alive	TUMOR FREE	987	#N/A	[Not Available]	#N/A	#N/A	#N/A	#N/A	[Not Available]	Negative	#N/A	0	987	0	987	0	987	0	987
773	TCGA-AC-A3EH	BRCA	79	FEMALE	WHITE	Stage IIIC	[Not Applicable]	Infiltrating Lobular Carcinoma	[Not Available]	2011	Post (prior bilateral ovariectomy OR >12 mo since LMP with no prior hysterectomy)	-29014	Dead	TUMOR FREE	#N/A	197	[Not Available]	#N/A	#N/A	#N/A	#N/A	[Not Available]	Negative	#N/A	1	197	0	197	0	197	0	197
774	TCGA-AC-A3HN	BRCA	87	FEMALE	WHITE	Stage IIB	[Not Applicable]	Infiltrating Lobular Carcinoma	[Not Available]	2011	Post (prior bilateral ovariectomy OR >12 mo since LMP with no prior hysterectomy)	-32061	Alive	TUMOR FREE	496	#N/A	[Not Available]	#N/A	#N/A	#N/A	#N/A	[Not Available]	Negative	#N/A	0	496	0	496	0	496	0	496
775	TCGA-AC-A3OD	BRCA	68	FEMALE	WHITE	Stage IIB	[Not Applicable]	Infiltrating Lobular Carcinoma	[Not Available]	2011	Post (prior bilateral ovariectomy OR >12 mo since LMP with no prior hysterectomy)	-25186	Alive	TUMOR FREE	451	#N/A	[Not Available]	#N/A	#N/A	#N/A	#N/A	[Not Available]	Negative	#N/A	0	451	0	451	0	451	0	451
776	TCGA-AC-A3QP	BRCA	79	FEMALE	WHITE	Stage IIB	[Not Applicable]	Infiltrating Lobular Carcinoma	[Not Available]	2011	Post (prior bilateral ovariectomy OR >12 mo since LMP with no prior hysterectomy)	-29113	Alive	TUMOR FREE	675	#N/A	[Not Available]	#N/A	#N/A	#N/A	#N/A	[Not Available]	Negative	#N/A	0	675	0	675	0	675	0	675
777	TCGA-AC-A3QQ	BRCA	54	FEMALE	WHITE	Stage IA	[Not Applicable]	Infiltrating Lobular Carcinoma	[Not Available]	2011	Peri (6-12 months since last menstrual period)	-19723	Alive	TUMOR FREE	734	#N/A	[Not Available]	#N/A	#N/A	#N/A	#N/A	[Not Available]	Close	#N/A	0	734	0	734	#N/A	#N/A	0	734
778	TCGA-AC-A3TM	BRCA	50	FEMALE	WHITE	Stage IIIA	[Not Applicable]	Infiltrating Lobular Carcinoma	[Not Available]	2011	Peri (6-12 months since last menstrual period)	-18535	Alive	TUMOR FREE	762	#N/A	[Not Available]	#N/A	#N/A	#N/A	#N/A	[Not Available]	Negative	#N/A	0	762	0	762	0	762	0	762
779	TCGA-AC-A3TN	BRCA	75	FEMALE	WHITE	Stage IIB	[Not Applicable]	Infiltrating Lobular Carcinoma	[Not Available]	2012	Post (prior bilateral ovariectomy OR >12 mo since LMP with no prior hysterectomy)	-27421	Alive	TUMOR FREE	456	#N/A	[Not Available]	#N/A	#N/A	#N/A	#N/A	[Not Available]	Negative	#N/A	0	456	0	456	0	456	0	456
780	TCGA-AC-A3W5	BRCA	65	FEMALE	BLACK OR AFRICAN AMERICAN	Stage IIA	[Not Applicable]	Infiltrating Lobular Carcinoma	[Not Available]	2011	[Not Evaluated]	-24029	Alive	TUMOR FREE	504	#N/A	[Not Available]	#N/A	#N/A	#N/A	#N/A	[Not Available]	Close	#N/A	0	504	0	504	#N/A	#N/A	0	504
781	TCGA-AC-A3W6	BRCA	90	FEMALE	WHITE	Stage IIIA	[Not Applicable]	Infiltrating Lobular Carcinoma	[Not Available]	2012	Post (prior bilateral ovariectomy OR >12 mo since LMP with no prior hysterectomy)	-32872	Alive	TUMOR FREE	602	#N/A	[Not Available]	#N/A	#N/A	#N/A	#N/A	[Not Available]	Negative	#N/A	0	602	0	602	0	602	0	602
782	TCGA-AC-A3W7	BRCA	66	FEMALE	WHITE	Stage IIB	[Not Applicable]	Infiltrating Lobular Carcinoma	[Not Available]	2012	Post (prior bilateral ovariectomy OR >12 mo since LMP with no prior hysterectomy)	-24327	Alive	TUMOR FREE	471	#N/A	[Not Available]	#N/A	#N/A	#N/A	#N/A	[Not Available]	Negative	#N/A	0	471	0	471	0	471	0	471
783	TCGA-AC-A3YI	BRCA	74	FEMALE	WHITE	Stage IIIC	[Not Applicable]	Infiltrating Lobular Carcinoma	[Not Available]	2012	Post (prior bilateral ovariectomy OR >12 mo since LMP with no prior hysterectomy)	-27143	Alive	TUMOR FREE	707	#N/A	[Not Available]	#N/A	#N/A	#N/A	#N/A	[Not Available]	Negative	#N/A	0	707	0	707	0	707	0	707
784	TCGA-AC-A3YJ	BRCA	66	FEMALE	WHITE	Stage IIA	[Not Applicable]	Other, specify	[Not Available]	2012	Post (prior bilateral ovariectomy OR >12 mo since LMP with no prior hysterectomy)	-24439	Alive	TUMOR FREE	754	#N/A	[Not Available]	#N/A	#N/A	#N/A	#N/A	[Not Available]	Negative	#N/A	0	754	0	754	0	754	0	754
785	TCGA-AC-A4ZE	BRCA	63	FEMALE	WHITE	Stage IIB	[Not Applicable]	Infiltrating Lobular Carcinoma	[Not Available]	2012	Post (prior bilateral ovariectomy OR >12 mo since LMP with no prior hysterectomy)	-23284	Alive	TUMOR FREE	890	#N/A	[Not Available]	#N/A	#N/A	#N/A	#N/A	[Not Available]	Negative	#N/A	0	890	0	890	0	890	0	890
786	TCGA-AC-A5EH	BRCA	76	FEMALE	BLACK OR AFRICAN AMERICAN	Stage IIB	[Not Applicable]	Infiltrating Ductal Carcinoma	[Not Available]	2012	[Not Available]	-27964	Alive	TUMOR FREE	511	#N/A	[Not Available]	#N/A	#N/A	#N/A	#N/A	[Not Available]	Negative	#N/A	0	511	0	511	0	511	0	511
787	TCGA-AC-A5EI	BRCA	88	FEMALE	WHITE	Stage IB	[Not Applicable]	Other, specify	[Not Available]	2012	[Not Available]	-32375	Alive	TUMOR FREE	442	#N/A	[Not Available]	#N/A	#N/A	#N/A	#N/A	[Not Available]	Negative	#N/A	0	442	0	442	0	442	0	442
788	TCGA-AC-A5XS	BRCA	74	FEMALE	WHITE	Stage IIA	[Not Applicable]	Infiltrating Lobular Carcinoma	[Not Available]	2012	[Not Available]	-27160	Alive	TUMOR FREE	588	#N/A	[Not Available]	#N/A	#N/A	#N/A	#N/A	[Not Available]	Negative	#N/A	0	588	0	588	0	588	0	588
789	TCGA-AC-A5XU	BRCA	74	FEMALE	BLACK OR AFRICAN AMERICAN	Stage IIB	[Not Applicable]	Infiltrating Ductal Carcinoma	[Not Available]	2013	[Not Available]	-27191	Alive	TUMOR FREE	455	#N/A	[Not Available]	#N/A	#N/A	#N/A	#N/A	[Not Available]	Negative	#N/A	0	455	0	455	0	455	0	455
790	TCGA-AC-A62V	BRCA	58	MALE	BLACK OR AFRICAN AMERICAN	Stage IV	[Not Applicable]	Infiltrating Ductal Carcinoma	[Not Available]	2013	[Not Evaluated]	-21389	Dead	WITH TUMOR	#N/A	348	[Not Available]	#N/A	#N/A	#N/A	#N/A	[Not Available]	Negative	#N/A	1	348	1	348	#N/A	#N/A	1	348
791	TCGA-AC-A62X	BRCA	72	FEMALE	BLACK OR AFRICAN AMERICAN	Stage IIA	[Not Applicable]	Infiltrating Ductal Carcinoma	[Not Available]	2013	Post (prior bilateral ovariectomy OR >12 mo since LMP with no prior hysterectomy)	-26627	Alive	TUMOR FREE	417	#N/A	[Not Available]	#N/A	#N/A	#N/A	#N/A	[Not Available]	Negative	#N/A	0	417	0	417	0	417	0	417
792	TCGA-AC-A62Y	BRCA	79	FEMALE	WHITE	Stage IIB	[Not Applicable]	Infiltrating Lobular Carcinoma	[Not Available]	2012	Post (prior bilateral ovariectomy OR >12 mo since LMP with no prior hysterectomy)	-28876	Alive	TUMOR FREE	530	#N/A	[Not Available]	#N/A	#N/A	#N/A	#N/A	[Not Available]	Positive	#N/A	0	530	0	530	#N/A	#N/A	0	530
793	TCGA-AC-A6IV	BRCA	47	FEMALE	WHITE	Stage IIB	[Not Applicable]	Infiltrating Lobular Carcinoma	[Not Available]	2012	[Not Available]	-17521	Alive	TUMOR FREE	568	#N/A	[Not Available]	#N/A	#N/A	#N/A	#N/A	[Not Available]	Negative	#N/A	0	568	0	568	0	568	0	568
794	TCGA-AC-A6IW	BRCA	73	FEMALE	BLACK OR AFRICAN AMERICAN	Stage IIA	[Not Applicable]	Infiltrating Ductal Carcinoma	[Not Available]	2013	Post (prior bilateral ovariectomy OR >12 mo since LMP with no prior hysterectomy)	-26896	Alive	TUMOR FREE	413	#N/A	[Not Available]	#N/A	#N/A	#N/A	#N/A	[Not Available]	Negative	#N/A	0	413	0	413	0	413	0	413
795	TCGA-AC-A6IX	BRCA	49	FEMALE	WHITE	Stage IIIC	[Not Applicable]	Infiltrating Lobular Carcinoma	[Not Available]	2013	Peri (6-12 months since last menstrual period)	-17969	Alive	TUMOR FREE	373	#N/A	[Not Available]	#N/A	#N/A	#N/A	#N/A	[Not Available]	Negative	#N/A	0	373	0	373	0	373	0	373
796	TCGA-AC-A6NO	BRCA	43	FEMALE	BLACK OR AFRICAN AMERICAN	Stage IIB	[Not Applicable]	Infiltrating Ductal Carcinoma	[Not Available]	2011	[Unknown]	-15996	Alive	TUMOR FREE	51	#N/A	[Not Available]	#N/A	#N/A	#N/A	#N/A	[Not Available]	Negative	#N/A	0	51	0	51	0	51	0	51
797	TCGA-AC-A7VB	BRCA	51	FEMALE	BLACK OR AFRICAN AMERICAN	Stage IIA	[Not Applicable]	Infiltrating Ductal Carcinoma	[Not Available]	2013	[Unknown]	-18806	Alive	TUMOR FREE	250	#N/A	[Not Available]	#N/A	#N/A	#N/A	#N/A	[Not Available]	Negative	#N/A	0	250	0	250	0	250	0	250
798	TCGA-AC-A7VC	BRCA	56	FEMALE	WHITE	Stage IIB	[Not Applicable]	Metaplastic Carcinoma	[Not Available]	2013	Post (prior bilateral ovariectomy OR >12 mo since LMP with no prior hysterectomy)	-20479	Alive	TUMOR FREE	1	#N/A	[Not Available]	#N/A	#N/A	#N/A	#N/A	[Not Available]	Negative	#N/A	0	1	0	1	0	1	0	1
799	TCGA-AC-A8OP	BRCA	72	FEMALE	BLACK OR AFRICAN AMERICAN	Stage IA	[Not Applicable]	Infiltrating Ductal Carcinoma	[Not Available]	2011	Post (prior bilateral ovariectomy OR >12 mo since LMP with no prior hysterectomy)	-26550	Alive	TUMOR FREE	614	#N/A	[Not Available]	#N/A	#N/A	#N/A	#N/A	[Not Available]	Negative	#N/A	0	614	0	614	0	614	0	614
800	TCGA-AC-A8OQ	BRCA	72	FEMALE	BLACK OR AFRICAN AMERICAN	Stage IIB	[Not Applicable]	Infiltrating Ductal Carcinoma	[Not Available]	2011	Post (prior bilateral ovariectomy OR >12 mo since LMP with no prior hysterectomy)	-26535	Alive	TUMOR FREE	34	#N/A	[Not Available]	#N/A	#N/A	#N/A	#N/A	[Not Available]	Negative	#N/A	0	34	0	34	0	34	0	34
801	TCGA-AC-A8OR	BRCA	75	FEMALE	WHITE	Stage IA	[Not Applicable]	Mucinous Carcinoma	[Not Available]	2013	Post (prior bilateral ovariectomy OR >12 mo since LMP with no prior hysterectomy)	-27605	Alive	TUMOR FREE	40	#N/A	[Not Available]	#N/A	#N/A	#N/A	#N/A	[Not Available]	Negative	#N/A	0	40	0	40	0	40	0	40
802	TCGA-AC-A8OS	BRCA	71	FEMALE	WHITE	Stage IIA	[Not Applicable]	Infiltrating Lobular Carcinoma	[Not Available]	2013	Post (prior bilateral ovariectomy OR >12 mo since LMP with no prior hysterectomy)	-26248	Alive	TUMOR FREE	70	#N/A	[Not Available]	#N/A	#N/A	#N/A	#N/A	[Not Available]	Negative	#N/A	0	70	0	70	0	70	0	70
803	TCGA-AN-A03X	BRCA	74	FEMALE	WHITE	Stage IIA	[Not Applicable]	Infiltrating Ductal Carcinoma	[Not Available]	2010	Post (prior bilateral ovariectomy OR >12 mo since LMP with no prior hysterectomy)	-27163	Alive	TUMOR FREE	10	#N/A	[Not Available]	#N/A	#N/A	#N/A	#N/A	[Not Available]	Negative	#N/A	0	10	0	10	0	10	0	10
804	TCGA-AN-A03Y	BRCA	66	FEMALE	WHITE	Stage IIA	[Not Applicable]	Infiltrating Ductal Carcinoma	[Not Available]	2010	Post (prior bilateral ovariectomy OR >12 mo since LMP with no prior hysterectomy)	-24232	Alive	TUMOR FREE	10	#N/A	[Not Available]	#N/A	#N/A	#N/A	#N/A	[Not Available]	Negative	#N/A	0	10	0	10	0	10	0	10
805	TCGA-AN-A041	BRCA	29	FEMALE	WHITE	Stage IIB	[Not Applicable]	Infiltrating Ductal Carcinoma	[Not Available]	2010	Pre (<6 months since LMP AND no prior bilateral ovariectomy AND not on estrogen replacement)	-10812	Alive	TUMOR FREE	7	#N/A	[Not Available]	#N/A	#N/A	#N/A	#N/A	[Not Available]	Negative	#N/A	0	7	0	7	0	7	0	7
806	TCGA-AN-A046	BRCA	68	FEMALE	WHITE	Stage IIA	[Not Applicable]	Infiltrating Ductal Carcinoma	[Not Available]	2010	Post (prior bilateral ovariectomy OR >12 mo since LMP with no prior hysterectomy)	-25158	Alive	TUMOR FREE	10	#N/A	[Not Available]	#N/A	#N/A	#N/A	#N/A	[Not Available]	Negative	#N/A	0	10	0	10	0	10	0	10
807	TCGA-AN-A049	BRCA	62	FEMALE	WHITE	Stage IIA	[Not Applicable]	Infiltrating Ductal Carcinoma	[Not Available]	2008	Post (prior bilateral ovariectomy OR >12 mo since LMP with no prior hysterectomy)	-22710	Alive	TUMOR FREE	19	#N/A	[Not Available]	#N/A	#N/A	#N/A	#N/A	[Not Available]	Positive	#N/A	0	19	0	19	#N/A	#N/A	0	19
808	TCGA-AN-A04A	BRCA	36	FEMALE	WHITE	Stage IIIA	[Not Applicable]	Infiltrating Ductal Carcinoma	[Not Available]	2008	Peri (6-12 months since last menstrual period)	-13445	Alive	TUMOR FREE	90	#N/A	[Not Available]	#N/A	#N/A	#N/A	#N/A	[Not Available]	Positive	#N/A	0	90	0	90	#N/A	#N/A	0	90
809	TCGA-AN-A04C	BRCA	51	FEMALE	WHITE	Stage IIB	[Not Applicable]	Infiltrating Ductal Carcinoma	[Not Available]	2008	Post (prior bilateral ovariectomy OR >12 mo since LMP with no prior hysterectomy)	-18851	Alive	TUMOR FREE	54	#N/A	[Not Available]	#N/A	#N/A	#N/A	#N/A	[Not Available]	Positive	#N/A	0	54	0	54	#N/A	#N/A	0	54
810	TCGA-AN-A04D	BRCA	58	FEMALE	WHITE	Stage IIB	[Not Applicable]	Infiltrating Ductal Carcinoma	[Not Available]	2008	Post (prior bilateral ovariectomy OR >12 mo since LMP with no prior hysterectomy)	-21426	Alive	TUMOR FREE	52	#N/A	[Not Available]	#N/A	#N/A	#N/A	#N/A	[Not Available]	Positive	#N/A	0	52	0	52	#N/A	#N/A	0	52
811	TCGA-AN-A0AJ	BRCA	79	FEMALE	WHITE	Stage IIB	[Not Applicable]	Infiltrating Ductal Carcinoma	[Not Available]	2010	Post (prior bilateral ovariectomy OR >12 mo since LMP with no prior hysterectomy)	-29131	Alive	TUMOR FREE	303	#N/A	[Not Available]	#N/A	#N/A	#N/A	#N/A	[Not Available]	Negative	#N/A	0	303	0	303	0	303	0	303
812	TCGA-AN-A0AK	BRCA	76	FEMALE	WHITE	Stage IIA	[Not Applicable]	Infiltrating Ductal Carcinoma	[Not Available]	2010	Post (prior bilateral ovariectomy OR >12 mo since LMP with no prior hysterectomy)	-27977	Alive	TUMOR FREE	224	#N/A	[Not Available]	#N/A	#N/A	#N/A	#N/A	[Not Available]	Negative	#N/A	0	224	0	224	0	224	0	224
813	TCGA-AN-A0AL	BRCA	41	FEMALE	WHITE	Stage IIIB	[Not Applicable]	Infiltrating Ductal Carcinoma	[Not Available]	2010	Pre (<6 months since LMP AND no prior bilateral ovariectomy AND not on estrogen replacement)	-15286	Alive	TUMOR FREE	227	#N/A	[Not Available]	#N/A	#N/A	#N/A	#N/A	[Not Available]	Negative	#N/A	0	227	0	227	0	227	0	227
814	TCGA-AN-A0AM	BRCA	56	FEMALE	WHITE	Stage IIA	[Not Applicable]	Infiltrating Ductal Carcinoma	[Not Available]	2010	Post (prior bilateral ovariectomy OR >12 mo since LMP with no prior hysterectomy)	-20713	Alive	TUMOR FREE	5	#N/A	[Not Available]	#N/A	#N/A	#N/A	#N/A	[Not Available]	Negative	#N/A	0	5	0	5	0	5	0	5
815	TCGA-AN-A0AR	BRCA	55	FEMALE	WHITE	Stage IIA	[Not Applicable]	Infiltrating Ductal Carcinoma	[Not Available]	2010	Pre (<6 months since LMP AND no prior bilateral ovariectomy AND not on estrogen replacement)	-20152	Alive	TUMOR FREE	10	#N/A	[Not Available]	#N/A	#N/A	#N/A	#N/A	[Not Available]	Negative	#N/A	0	10	0	10	0	10	0	10
816	TCGA-AN-A0AS	BRCA	70	FEMALE	WHITE	Stage IIIA	[Not Applicable]	Infiltrating Ductal Carcinoma	[Not Available]	2010	Post (prior bilateral ovariectomy OR >12 mo since LMP with no prior hysterectomy)	-25658	Alive	TUMOR FREE	10	#N/A	[Not Available]	#N/A	#N/A	#N/A	#N/A	[Not Available]	Negative	#N/A	0	10	0	10	0	10	0	10
817	TCGA-AN-A0AT	BRCA	62	FEMALE	WHITE	Stage IIA	[Not Applicable]	Infiltrating Ductal Carcinoma	[Not Available]	2010	Post (prior bilateral ovariectomy OR >12 mo since LMP with no prior hysterectomy)	-22798	Alive	TUMOR FREE	10	#N/A	[Not Available]	#N/A	#N/A	#N/A	#N/A	[Not Available]	Negative	#N/A	0	10	0	10	0	10	0	10
818	TCGA-AN-A0FD	BRCA	71	FEMALE	WHITE	Stage IIA	[Not Applicable]	Infiltrating Ductal Carcinoma	[Not Available]	2010	Post (prior bilateral ovariectomy OR >12 mo since LMP with no prior hysterectomy)	-26007	Alive	TUMOR FREE	196	#N/A	[Not Available]	#N/A	#N/A	#N/A	#N/A	[Not Available]	Negative	#N/A	0	196	0	196	0	196	0	196
819	TCGA-AN-A0FF	BRCA	32	FEMALE	WHITE	Stage IA	[Not Applicable]	Infiltrating Ductal Carcinoma	[Not Available]	2010	Pre (<6 months since LMP AND no prior bilateral ovariectomy AND not on estrogen replacement)	-11929	Alive	TUMOR FREE	172	#N/A	[Not Available]	#N/A	#N/A	#N/A	#N/A	[Not Available]	Negative	#N/A	0	172	0	172	0	172	0	172
820	TCGA-AN-A0FJ	BRCA	59	FEMALE	WHITE	Stage IV	[Not Applicable]	Infiltrating Ductal Carcinoma	[Not Available]	2010	Peri (6-12 months since last menstrual period)	-21910	Alive	TUMOR FREE	242	#N/A	[Not Available]	#N/A	#N/A	#N/A	#N/A	[Not Available]	Negative	#N/A	0	242	0	242	#N/A	#N/A	0	242
821	TCGA-AN-A0FK	BRCA	88	FEMALE	WHITE	Stage IIIB	[Not Applicable]	Infiltrating Ductal Carcinoma	[Not Available]	2010	Post (prior bilateral ovariectomy OR >12 mo since LMP with no prior hysterectomy)	-32462	Alive	TUMOR FREE	213	#N/A	[Not Available]	#N/A	#N/A	#N/A	#N/A	[Not Available]	Negative	#N/A	0	213	0	213	0	213	0	213
822	TCGA-AN-A0FL	BRCA	62	FEMALE	WHITE	Stage IIA	[Not Applicable]	Infiltrating Ductal Carcinoma	[Not Available]	2010	Post (prior bilateral ovariectomy OR >12 mo since LMP with no prior hysterectomy)	-22805	Alive	TUMOR FREE	231	#N/A	[Not Available]	#N/A	#N/A	#N/A	#N/A	[Not Available]	Negative	#N/A	0	231	0	231	0	231	0	231
823	TCGA-AN-A0FN	BRCA	61	FEMALE	WHITE	Stage IA	[Not Applicable]	Infiltrating Lobular Carcinoma	[Not Available]	2010	Post (prior bilateral ovariectomy OR >12 mo since LMP with no prior hysterectomy)	-22629	Alive	TUMOR FREE	218	#N/A	[Not Available]	#N/A	#N/A	#N/A	#N/A	[Not Available]	Negative	#N/A	0	218	0	218	0	218	0	218
824	TCGA-AN-A0FS	BRCA	55	FEMALE	WHITE	Stage IA	[Not Applicable]	Infiltrating Lobular Carcinoma	[Not Available]	2010	Peri (6-12 months since last menstrual period)	-20352	Alive	TUMOR FREE	210	#N/A	[Not Available]	#N/A	#N/A	#N/A	#N/A	[Not Available]	Negative	#N/A	0	210	0	210	0	210	0	210
825	TCGA-AN-A0FT	BRCA	63	FEMALE	WHITE	Stage IIB	[Not Applicable]	Infiltrating Ductal Carcinoma	[Not Available]	2010	Post (prior bilateral ovariectomy OR >12 mo since LMP with no prior hysterectomy)	-23300	Alive	TUMOR FREE	214	#N/A	[Not Available]	#N/A	#N/A	#N/A	#N/A	[Not Available]	Negative	#N/A	0	214	0	214	0	214	0	214
826	TCGA-AN-A0FV	BRCA	58	FEMALE	WHITE	Stage IIA	[Not Applicable]	Infiltrating Ductal Carcinoma	[Not Available]	2010	Post (prior bilateral ovariectomy OR >12 mo since LMP with no prior hysterectomy)	-21479	Alive	TUMOR FREE	10	#N/A	[Not Available]	#N/A	#N/A	#N/A	#N/A	[Not Available]	Negative	#N/A	0	10	0	10	0	10	0	10
827	TCGA-AN-A0FW	BRCA	67	FEMALE	WHITE	Stage IIIA	[Not Applicable]	Infiltrating Ductal Carcinoma	[Not Available]	2010	Post (prior bilateral ovariectomy OR >12 mo since LMP with no prior hysterectomy)	-24692	Alive	TUMOR FREE	11	#N/A	[Not Available]	#N/A	#N/A	#N/A	#N/A	[Not Available]	Negative	#N/A	0	11	0	11	0	11	0	11
828	TCGA-AN-A0FX	BRCA	52	FEMALE	WHITE	Stage IIA	[Not Applicable]	Infiltrating Ductal Carcinoma	[Not Available]	2010	Post (prior bilateral ovariectomy OR >12 mo since LMP with no prior hysterectomy)	-19309	Alive	TUMOR FREE	10	#N/A	[Not Available]	#N/A	#N/A	#N/A	#N/A	[Not Available]	Negative	#N/A	0	10	0	10	0	10	0	10
829	TCGA-AN-A0FY	BRCA	55	FEMALE	WHITE	Stage IA	[Not Applicable]	Infiltrating Ductal Carcinoma	[Not Available]	2010	Post (prior bilateral ovariectomy OR >12 mo since LMP with no prior hysterectomy)	-20347	Alive	TUMOR FREE	10	#N/A	[Not Available]	#N/A	#N/A	#N/A	#N/A	[Not Available]	Negative	#N/A	0	10	0	10	0	10	0	10
830	TCGA-AN-A0FZ	BRCA	45	FEMALE	WHITE	Stage IIIA	[Not Applicable]	Infiltrating Ductal Carcinoma	[Not Available]	2010	Pre (<6 months since LMP AND no prior bilateral ovariectomy AND not on estrogen replacement)	-16533	Alive	TUMOR FREE	10	#N/A	[Not Available]	#N/A	#N/A	#N/A	#N/A	[Not Available]	Negative	#N/A	0	10	0	10	0	10	0	10
831	TCGA-AN-A0G0	BRCA	56	FEMALE	WHITE	Stage IIA	[Not Applicable]	Infiltrating Ductal Carcinoma	[Not Available]	2010	Post (prior bilateral ovariectomy OR >12 mo since LMP with no prior hysterectomy)	-20504	Alive	TUMOR FREE	16	#N/A	[Not Available]	#N/A	#N/A	#N/A	#N/A	[Not Available]	Negative	#N/A	0	16	0	16	0	16	0	16
832	TCGA-AN-A0XL	BRCA	61	FEMALE	WHITE	Stage IIA	[Not Applicable]	Infiltrating Ductal Carcinoma	[Not Available]	2010	Post (prior bilateral ovariectomy OR >12 mo since LMP with no prior hysterectomy)	-22341	Alive	TUMOR FREE	163	#N/A	[Not Available]	#N/A	#N/A	#N/A	#N/A	[Not Available]	Negative	#N/A	0	163	0	163	0	163	0	163
833	TCGA-AN-A0XN	BRCA	68	FEMALE	WHITE	Stage IIIA	[Not Applicable]	Infiltrating Ductal Carcinoma	[Not Available]	2010	Post (prior bilateral ovariectomy OR >12 mo since LMP with no prior hysterectomy)	-25029	Alive	TUMOR FREE	10	#N/A	[Not Available]	#N/A	#N/A	#N/A	#N/A	[Not Available]	Negative	#N/A	0	10	0	10	0	10	0	10
834	TCGA-AN-A0XO	BRCA	59	FEMALE	WHITE	Stage IIIA	[Not Applicable]	Infiltrating Ductal Carcinoma	[Not Available]	2010	Post (prior bilateral ovariectomy OR >12 mo since LMP with no prior hysterectomy)	-21640	Alive	TUMOR FREE	375	#N/A	[Not Available]	#N/A	#N/A	#N/A	#N/A	[Not Available]	Negative	#N/A	0	375	0	375	0	375	0	375
835	TCGA-AN-A0XP	BRCA	69	FEMALE	WHITE	Stage IIIA	[Not Applicable]	Infiltrating Ductal Carcinoma	[Not Available]	2010	Post (prior bilateral ovariectomy OR >12 mo since LMP with no prior hysterectomy)	-25305	Alive	TUMOR FREE	9	#N/A	[Not Available]	#N/A	#N/A	#N/A	#N/A	[Not Available]	Negative	#N/A	0	9	0	9	0	9	0	9
836	TCGA-AN-A0XR	BRCA	55	FEMALE	WHITE	Stage IIIA	[Not Applicable]	Infiltrating Ductal Carcinoma	[Not Available]	2010	Post (prior bilateral ovariectomy OR >12 mo since LMP with no prior hysterectomy)	-20381	Alive	TUMOR FREE	10	#N/A	[Not Available]	#N/A	#N/A	#N/A	#N/A	[Not Available]	Negative	#N/A	0	10	0	10	0	10	0	10
837	TCGA-AN-A0XS	BRCA	63	FEMALE	WHITE	Stage IIIA	[Not Applicable]	Infiltrating Ductal Carcinoma	[Not Available]	2010	Post (prior bilateral ovariectomy OR >12 mo since LMP with no prior hysterectomy)	-23358	Alive	TUMOR FREE	10	#N/A	[Not Available]	#N/A	#N/A	#N/A	#N/A	[Not Available]	Negative	#N/A	0	10	0	10	0	10	0	10
838	TCGA-AN-A0XT	BRCA	54	FEMALE	WHITE	Stage IIIA	[Not Applicable]	Infiltrating Ductal Carcinoma	[Not Available]	2010	Post (prior bilateral ovariectomy OR >12 mo since LMP with no prior hysterectomy)	-19794	Alive	TUMOR FREE	10	#N/A	[Not Available]	#N/A	#N/A	#N/A	#N/A	[Not Available]	Negative	#N/A	0	10	0	10	0	10	0	10
839	TCGA-AN-A0XU	BRCA	54	FEMALE	WHITE	Stage IIA	[Not Applicable]	Infiltrating Ductal Carcinoma	[Not Available]	2010	Post (prior bilateral ovariectomy OR >12 mo since LMP with no prior hysterectomy)	-20052	Alive	TUMOR FREE	10	#N/A	[Not Available]	#N/A	#N/A	#N/A	#N/A	[Not Available]	Negative	#N/A	0	10	0	10	0	10	0	10
840	TCGA-AN-A0XV	BRCA	67	FEMALE	WHITE	Stage IIIA	[Not Applicable]	Infiltrating Ductal Carcinoma	[Not Available]	2010	Post (prior bilateral ovariectomy OR >12 mo since LMP with no prior hysterectomy)	-24779	Alive	TUMOR FREE	162	#N/A	[Not Available]	#N/A	#N/A	#N/A	#N/A	[Not Available]	Negative	#N/A	0	162	0	162	0	162	0	162
841	TCGA-AN-A0XW	BRCA	36	FEMALE	WHITE	Stage IIIA	[Not Applicable]	Infiltrating Ductal Carcinoma	[Not Available]	2010	Pre (<6 months since LMP AND no prior bilateral ovariectomy AND not on estrogen replacement)	-13208	Alive	TUMOR FREE	170	#N/A	[Not Available]	#N/A	#N/A	#N/A	#N/A	[Not Available]	Negative	#N/A	0	170	0	170	0	170	0	170
842	TCGA-AO-A03L	BRCA	34	FEMALE	ASIAN	Stage IIIA	[Not Applicable]	Infiltrating Ductal Carcinoma	[Not Available]	2003	Pre (<6 months since LMP AND no prior bilateral ovariectomy AND not on estrogen replacement)	-12443	Alive	TUMOR FREE	2442	#N/A	[Not Available]	#N/A	#N/A	#N/A	#N/A	[Not Available]	Negative	#N/A	0	2442	0	2442	0	2442	0	2442
843	TCGA-AO-A03M	BRCA	29	FEMALE	WHITE	Stage I	[Not Applicable]	Infiltrating Ductal Carcinoma	[Not Available]	2006	Pre (<6 months since LMP AND no prior bilateral ovariectomy AND not on estrogen replacement)	-10616	Alive	TUMOR FREE	1866	#N/A	[Not Available]	#N/A	#N/A	#N/A	#N/A	[Not Available]	Negative	#N/A	0	1866	0	1866	0	1866	0	1866
844	TCGA-AO-A03N	BRCA	59	FEMALE	WHITE	Stage IIB	[Not Applicable]	Infiltrating Ductal Carcinoma	[Not Available]	2006	Post (prior bilateral ovariectomy OR >12 mo since LMP with no prior hysterectomy)	-21816	Alive	WITH TUMOR	2031	#N/A	[Not Available]	Locoregional Disease	#N/A	#N/A	1645	[Not Available]	Negative	#N/A	0	2031	0	2031	1	1645	1	1645
845	TCGA-AO-A03O	BRCA	69	FEMALE	BLACK OR AFRICAN AMERICAN	Stage IIA	[Not Applicable]	Infiltrating Ductal Carcinoma	[Not Available]	2002	Post (prior bilateral ovariectomy OR >12 mo since LMP with no prior hysterectomy)	-25362	Dead	TUMOR FREE	#N/A	2483	[Not Available]	#N/A	#N/A	#N/A	#N/A	[Not Available]	Negative	#N/A	1	2483	0	2483	0	2483	0	2483
846	TCGA-AO-A03P	BRCA	54	FEMALE	BLACK OR AFRICAN AMERICAN	Stage IIB	[Not Applicable]	Infiltrating Ductal Carcinoma	[Not Available]	2003	Post (prior bilateral ovariectomy OR >12 mo since LMP with no prior hysterectomy)	-19724	Dead	WITH TUMOR	#N/A	2911	[Not Available]	Distant Metastasis	Liver	#N/A	1922	[Not Available]	Close	#N/A	1	2911	1	2911	#N/A	#N/A	1	1922
847	TCGA-AO-A03R	BRCA	57	FEMALE	WHITE	Stage IIB	[Not Applicable]	Infiltrating Ductal Carcinoma	[Not Available]	2005	Post (prior bilateral ovariectomy OR >12 mo since LMP with no prior hysterectomy)	-20930	Alive	TUMOR FREE	2091	#N/A	[Not Available]	#N/A	#N/A	#N/A	#N/A	[Not Available]	Negative	#N/A	0	2091	0	2091	0	2091	0	2091
848	TCGA-AO-A03T	BRCA	42	FEMALE	WHITE	Stage IIB	[Not Applicable]	Infiltrating Ductal Carcinoma	[Not Available]	2007	Pre (<6 months since LMP AND no prior bilateral ovariectomy AND not on estrogen replacement)	-15540	Alive	TUMOR FREE	2124	#N/A	[Not Available]	#N/A	#N/A	#N/A	#N/A	[Not Available]	Negative	#N/A	0	2124	0	2124	0	2124	0	2124
849	TCGA-AO-A03U	BRCA	31	FEMALE	WHITE	Stage I	[Not Applicable]	Other, specify	[Not Available]	2001	Pre (<6 months since LMP AND no prior bilateral ovariectomy AND not on estrogen replacement)	-11354	Dead	TUMOR FREE	#N/A	1793	[Not Available]	New Primary Tumor	Lung	#N/A	1614	[Not Available]	Negative	#N/A	1	1793	0	1793	0	1793	1	1614
850	TCGA-AO-A03V	BRCA	41	FEMALE	WHITE	Stage I	[Not Applicable]	Infiltrating Ductal Carcinoma	[Not Available]	2008	Peri (6-12 months since last menstrual period)	-15284	Alive	TUMOR FREE	1351	#N/A	[Not Available]	#N/A	#N/A	#N/A	#N/A	[Not Available]	Negative	#N/A	0	1351	0	1351	0	1351	0	1351
851	TCGA-AO-A0J2	BRCA	41	FEMALE	WHITE	Stage IA	[Not Applicable]	Infiltrating Ductal Carcinoma	[Not Available]	2008	Pre (<6 months since LMP AND no prior bilateral ovariectomy AND not on estrogen replacement)	-15324	Alive	TUMOR FREE	997	#N/A	[Not Available]	#N/A	#N/A	#N/A	#N/A	[Not Available]	Negative	#N/A	0	997	0	997	0	997	0	997
852	TCGA-AO-A0J3	BRCA	67	FEMALE	WHITE	Stage IIB	[Not Applicable]	Other, specify	[Not Available]	2009	Post (prior bilateral ovariectomy OR >12 mo since LMP with no prior hysterectomy)	-24519	Alive	TUMOR FREE	651	#N/A	[Not Available]	#N/A	#N/A	#N/A	#N/A	[Not Available]	Negative	#N/A	0	651	0	651	0	651	0	651
853	TCGA-AO-A0J4	BRCA	41	FEMALE	BLACK OR AFRICAN AMERICAN	Stage IA	[Not Applicable]	Infiltrating Ductal Carcinoma	[Not Available]	2009	Pre (<6 months since LMP AND no prior bilateral ovariectomy AND not on estrogen replacement)	-15052	Alive	TUMOR FREE	1587	#N/A	[Not Available]	#N/A	#N/A	#N/A	#N/A	[Not Available]	Negative	#N/A	0	1587	0	1587	0	1587	0	1587
854	TCGA-AO-A0J5	BRCA	48	FEMALE	WHITE	Stage IV	[Not Applicable]	Other, specify	[Not Available]	2008	Pre (<6 months since LMP AND no prior bilateral ovariectomy AND not on estrogen replacement)	-17815	Dead	WITH TUMOR	#N/A	792	[Not Available]	#N/A	#N/A	#N/A	#N/A	[Not Available]	Close	#N/A	1	792	1	792	#N/A	#N/A	1	792
855	TCGA-AO-A0J6	BRCA	61	FEMALE	WHITE	Stage IIA	[Not Applicable]	Infiltrating Ductal Carcinoma	[Not Available]	2008	Post (prior bilateral ovariectomy OR >12 mo since LMP with no prior hysterectomy)	-22462	Alive	TUMOR FREE	1140	#N/A	[Not Available]	#N/A	#N/A	#N/A	#N/A	[Not Available]	Negative	#N/A	0	1140	0	1140	0	1140	0	1140
856	TCGA-AO-A0J7	BRCA	71	FEMALE	WHITE	Stage IIB	[Not Applicable]	Other, specify	[Not Available]	2009	Post (prior bilateral ovariectomy OR >12 mo since LMP with no prior hysterectomy)	-26281	Alive	TUMOR FREE	618	#N/A	[Not Available]	#N/A	#N/A	#N/A	#N/A	[Not Available]	Negative	#N/A	0	618	0	618	0	618	0	618
857	TCGA-AO-A0J8	BRCA	61	FEMALE	WHITE	Stage IIA	[Not Applicable]	Infiltrating Lobular Carcinoma	[Not Available]	2009	Post (prior bilateral ovariectomy OR >12 mo since LMP with no prior hysterectomy)	-22284	Alive	TUMOR FREE	680	#N/A	[Not Available]	#N/A	#N/A	#N/A	#N/A	[Not Available]	Negative	#N/A	0	680	0	680	0	680	0	680
858	TCGA-AO-A0J9	BRCA	61	FEMALE	WHITE	Stage IIIC	[Not Applicable]	Infiltrating Lobular Carcinoma	[Not Available]	2007	Post (prior bilateral ovariectomy OR >12 mo since LMP with no prior hysterectomy)	-22642	Alive	WITH TUMOR	1613	#N/A	[Not Available]	Distant Metastasis	Bone	#N/A	1066	[Not Available]	Negative	#N/A	0	1613	0	1613	1	1066	1	1066
859	TCGA-AO-A0JA	BRCA	36	FEMALE	BLACK OR AFRICAN AMERICAN	Stage IIIC	[Not Applicable]	Infiltrating Ductal Carcinoma	[Not Available]	2009	Pre (<6 months since LMP AND no prior bilateral ovariectomy AND not on estrogen replacement)	-13307	Alive	WITH TUMOR	655	#N/A	[Not Available]	Distant Metastasis	Bone	#N/A	143	[Not Available]	Negative	#N/A	0	655	0	655	1	143	1	143
860	TCGA-AO-A0JB	BRCA	50	FEMALE	WHITE	Stage IIIA	[Not Applicable]	Infiltrating Ductal Carcinoma	[Not Available]	2007	Pre (<6 months since LMP AND no prior bilateral ovariectomy AND not on estrogen replacement)	-18561	Alive	TUMOR FREE	1542	#N/A	[Not Available]	#N/A	#N/A	#N/A	#N/A	[Not Available]	Negative	#N/A	0	1542	0	1542	0	1542	0	1542
861	TCGA-AO-A0JC	BRCA	64	FEMALE	WHITE	Stage IIA	[Not Applicable]	Infiltrating Ductal Carcinoma	[Not Available]	2006	Post (prior bilateral ovariectomy OR >12 mo since LMP with no prior hysterectomy)	-23404	Alive	TUMOR FREE	1547	#N/A	[Not Available]	#N/A	#N/A	#N/A	#N/A	[Not Available]	Negative	#N/A	0	1547	0	1547	0	1547	0	1547
862	TCGA-AO-A0JD	BRCA	59	FEMALE	WHITE	Stage IIIA	[Not Applicable]	Infiltrating Ductal Carcinoma	[Not Available]	2005	Post (prior bilateral ovariectomy OR >12 mo since LMP with no prior hysterectomy)	-21831	Alive	TUMOR FREE	2190	#N/A	[Not Available]	#N/A	#N/A	#N/A	#N/A	[Not Available]	Negative	#N/A	0	2190	0	2190	0	2190	0	2190
863	TCGA-AO-A0JE	BRCA	53	FEMALE	BLACK OR AFRICAN AMERICAN	Stage IIIA	[Not Applicable]	Infiltrating Ductal Carcinoma	[Not Available]	2005	Post (prior bilateral ovariectomy OR >12 mo since LMP with no prior hysterectomy)	-19516	Alive	TUMOR FREE	2335	#N/A	[Not Available]	#N/A	#N/A	#N/A	#N/A	[Not Available]	Positive	#N/A	0	2335	0	2335	#N/A	#N/A	0	2335
864	TCGA-AO-A0JF	BRCA	68	FEMALE	WHITE	Stage IIA	[Not Applicable]	Infiltrating Ductal Carcinoma	[Not Available]	2009	Post (prior bilateral ovariectomy OR >12 mo since LMP with no prior hysterectomy)	-24923	Alive	TUMOR FREE	1980	#N/A	[Not Available]	#N/A	#N/A	#N/A	#N/A	[Not Available]	Negative	#N/A	0	1980	0	1980	0	1980	0	1980
865	TCGA-AO-A0JG	BRCA	49	FEMALE	WHITE	Stage IIIA	[Not Applicable]	Other, specify	[Not Available]	2009	Post (prior bilateral ovariectomy OR >12 mo since LMP with no prior hysterectomy)	-18021	Alive	TUMOR FREE	798	#N/A	[Not Available]	#N/A	#N/A	#N/A	#N/A	[Not Available]	Close	#N/A	0	798	0	798	#N/A	#N/A	0	798
866	TCGA-AO-A0JI	BRCA	56	FEMALE	WHITE	Stage IIA	[Not Applicable]	Infiltrating Ductal Carcinoma	[Not Available]	2007	Post (prior bilateral ovariectomy OR >12 mo since LMP with no prior hysterectomy)	-20694	Alive	TUMOR FREE	1528	#N/A	[Not Available]	#N/A	#N/A	#N/A	#N/A	[Not Available]	Negative	#N/A	0	1528	0	1528	0	1528	0	1528
867	TCGA-AO-A0JJ	BRCA	54	FEMALE	WHITE	Stage IIB	[Not Applicable]	Infiltrating Lobular Carcinoma	[Not Available]	2006	Post (prior bilateral ovariectomy OR >12 mo since LMP with no prior hysterectomy)	-19758	Alive	TUMOR FREE	1887	#N/A	[Not Available]	#N/A	#N/A	#N/A	#N/A	[Not Available]	Negative	#N/A	0	1887	0	1887	0	1887	0	1887
868	TCGA-AO-A0JL	BRCA	59	FEMALE	WHITE	Stage IIIA	[Not Applicable]	Infiltrating Ductal Carcinoma	[Not Available]	2006	Post (prior bilateral ovariectomy OR >12 mo since LMP with no prior hysterectomy)	-21895	Alive	TUMOR FREE	1683	#N/A	[Not Available]	#N/A	#N/A	#N/A	#N/A	[Not Available]	Negative	#N/A	0	1683	0	1683	0	1683	0	1683
869	TCGA-AO-A0JM	BRCA	40	FEMALE	[Not Available]	Stage IIB	[Not Applicable]	Infiltrating Ductal Carcinoma	[Not Available]	2005	Pre (<6 months since LMP AND no prior bilateral ovariectomy AND not on estrogen replacement)	-14653	Alive	TUMOR FREE	2184	#N/A	[Not Available]	#N/A	#N/A	#N/A	#N/A	[Not Available]	Negative	#N/A	0	2184	0	2184	0	2184	0	2184
870	TCGA-AO-A124	BRCA	38	FEMALE	WHITE	Stage IIA	[Not Applicable]	Other, specify	[Not Available]	2002	Pre (<6 months since LMP AND no prior bilateral ovariectomy AND not on estrogen replacement)	-14174	Alive	TUMOR FREE	3506	#N/A	[Not Available]	#N/A	#N/A	#N/A	#N/A	[Not Available]	Negative	#N/A	0	3506	0	3506	0	3506	0	3506
871	TCGA-AO-A125	BRCA	72	FEMALE	BLACK OR AFRICAN AMERICAN	Stage IIA	[Not Applicable]	Other, specify	[Not Available]	2002	Post (prior bilateral ovariectomy OR >12 mo since LMP with no prior hysterectomy)	-26466	Alive	TUMOR FREE	3456	#N/A	[Not Available]	#N/A	#N/A	#N/A	#N/A	[Not Available]	Negative	#N/A	0	3456	0	3456	0	3456	0	3456
872	TCGA-AO-A126	BRCA	39	FEMALE	ASIAN	Stage IIA	[Not Applicable]	Infiltrating Ductal Carcinoma	[Not Available]	2002	Pre (<6 months since LMP AND no prior bilateral ovariectomy AND not on estrogen replacement)	-14264	Alive	TUMOR FREE	3307	#N/A	[Not Available]	Locoregional Disease	#N/A	#N/A	267	[Not Available]	Negative	#N/A	0	3307	0	3307	1	267	1	267
873	TCGA-AO-A128	BRCA	61	FEMALE	WHITE	Stage IIA	[Not Applicable]	Infiltrating Ductal Carcinoma	[Not Available]	2002	Post (prior bilateral ovariectomy OR >12 mo since LMP with no prior hysterectomy)	-22340	Alive	TUMOR FREE	3248	#N/A	[Not Available]	#N/A	#N/A	#N/A	#N/A	[Not Available]	Negative	#N/A	0	3248	0	3248	0	3248	0	3248
874	TCGA-AO-A129	BRCA	29	FEMALE	WHITE	Stage IIB	[Not Applicable]	Infiltrating Ductal Carcinoma	[Not Available]	2002	Pre (<6 months since LMP AND no prior bilateral ovariectomy AND not on estrogen replacement)	-10898	Alive	TUMOR FREE	3286	#N/A	[Not Available]	#N/A	#N/A	#N/A	#N/A	[Not Available]	Negative	#N/A	0	3286	0	3286	0	3286	0	3286
875	TCGA-AO-A12A	BRCA	47	FEMALE	WHITE	Stage IIA	[Not Applicable]	Infiltrating Ductal Carcinoma	[Not Available]	2003	Pre (<6 months since LMP AND no prior bilateral ovariectomy AND not on estrogen replacement)	-17420	Alive	TUMOR FREE	3112	#N/A	[Not Available]	#N/A	#N/A	#N/A	#N/A	[Not Available]	Close	#N/A	0	3112	0	3112	#N/A	#N/A	0	3112
876	TCGA-AO-A12B	BRCA	63	FEMALE	WHITE	Stage IIA	[Not Applicable]	Infiltrating Ductal Carcinoma	[Not Available]	2004	Post (prior bilateral ovariectomy OR >12 mo since LMP with no prior hysterectomy)	-23150	Alive	TUMOR FREE	2989	#N/A	[Not Available]	#N/A	#N/A	#N/A	#N/A	[Not Available]	Negative	#N/A	0	2989	0	2989	0	2989	0	2989
877	TCGA-AO-A12C	BRCA	42	FEMALE	WHITE	Stage IIB	[Not Applicable]	Infiltrating Ductal Carcinoma	[Not Available]	2005	Pre (<6 months since LMP AND no prior bilateral ovariectomy AND not on estrogen replacement)	-15469	Alive	TUMOR FREE	2372	#N/A	[Not Available]	#N/A	#N/A	#N/A	#N/A	[Not Available]	Negative	#N/A	0	2372	0	2372	0	2372	0	2372
878	TCGA-AO-A12D	BRCA	43	FEMALE	WHITE	Stage IIA	[Not Applicable]	Infiltrating Ductal Carcinoma	[Not Available]	2005	Pre (<6 months since LMP AND no prior bilateral ovariectomy AND not on estrogen replacement)	-15774	Alive	TUMOR FREE	2515	#N/A	[Not Available]	#N/A	#N/A	#N/A	#N/A	[Not Available]	Negative	#N/A	0	2515	0	2515	0	2515	0	2515
879	TCGA-AO-A12E	BRCA	51	FEMALE	WHITE	Stage IIB	[Not Applicable]	Infiltrating Lobular Carcinoma	[Not Available]	2005	Pre (<6 months since LMP AND no prior bilateral ovariectomy AND not on estrogen replacement)	-18721	Alive	TUMOR FREE	2142	#N/A	[Not Available]	#N/A	#N/A	#N/A	#N/A	[Not Available]	Negative	#N/A	0	2142	0	2142	0	2142	0	2142
880	TCGA-AO-A12F	BRCA	36	FEMALE	WHITE	Stage IIA	[Not Applicable]	Infiltrating Ductal Carcinoma	[Not Available]	2006	Pre (<6 months since LMP AND no prior bilateral ovariectomy AND not on estrogen replacement)	-13409	Alive	TUMOR FREE	1842	#N/A	[Not Available]	#N/A	#N/A	#N/A	#N/A	[Not Available]	Negative	#N/A	0	1842	0	1842	0	1842	0	1842
881	TCGA-AO-A12G	BRCA	75	FEMALE	WHITE	Stage IIA	[Not Applicable]	Other, specify	[Not Available]	2006	Post (prior bilateral ovariectomy OR >12 mo since LMP with no prior hysterectomy)	-27705	Alive	TUMOR FREE	1639	#N/A	[Not Available]	#N/A	#N/A	#N/A	#N/A	[Not Available]	Negative	#N/A	0	1639	0	1639	0	1639	0	1639
882	TCGA-AO-A12H	BRCA	69	FEMALE	BLACK OR AFRICAN AMERICAN	Stage IIA	[Not Applicable]	Other, specify	[Not Available]	2008	Pre (<6 months since LMP AND no prior bilateral ovariectomy AND not on estrogen replacement)	-25515	Alive	TUMOR FREE	1234	#N/A	[Not Available]	#N/A	#N/A	#N/A	#N/A	[Not Available]	Negative	#N/A	0	1234	0	1234	0	1234	0	1234
883	TCGA-AO-A1KO	BRCA	46	FEMALE	WHITE	Stage IIB	[Not Applicable]	Infiltrating Lobular Carcinoma	[Not Available]	2008	Pre (<6 months since LMP AND no prior bilateral ovariectomy AND not on estrogen replacement)	-16817	Alive	TUMOR FREE	622	#N/A	[Not Available]	#N/A	#N/A	#N/A	#N/A	[Not Available]	Negative	#N/A	0	622	0	622	0	622	0	622
884	TCGA-AO-A1KP	BRCA	77	FEMALE	WHITE	Stage IIA	[Not Applicable]	Infiltrating Ductal Carcinoma	[Not Available]	2003	Post (prior bilateral ovariectomy OR >12 mo since LMP with no prior hysterectomy)	-28247	Alive	TUMOR FREE	2953	#N/A	[Not Available]	#N/A	#N/A	#N/A	#N/A	[Not Available]	Negative	#N/A	0	2953	0	2953	0	2953	0	2953
885	TCGA-AO-A1KQ	BRCA	84	MALE	WHITE	Stage IIIB	[Not Applicable]	Infiltrating Ductal Carcinoma	[Not Available]	2006	[Not Available]	-30859	Alive	TUMOR FREE	1882	#N/A	[Not Available]	#N/A	#N/A	#N/A	#N/A	[Not Available]	Negative	#N/A	0	1882	0	1882	0	1882	0	1882
886	TCGA-AO-A1KR	BRCA	51	FEMALE	WHITE	Stage IIA	[Not Applicable]	Infiltrating Ductal Carcinoma	[Not Available]	2005	Pre (<6 months since LMP AND no prior bilateral ovariectomy AND not on estrogen replacement)	-18900	Alive	TUMOR FREE	2513	#N/A	[Not Available]	#N/A	#N/A	#N/A	#N/A	[Not Available]	Negative	#N/A	0	2513	0	2513	0	2513	0	2513
887	TCGA-AO-A1KS	BRCA	69	FEMALE	WHITE	Stage IIA	[Not Applicable]	Infiltrating Lobular Carcinoma	[Not Available]	2010	Post (prior bilateral ovariectomy OR >12 mo since LMP with no prior hysterectomy)	-25230	Alive	TUMOR FREE	350	#N/A	[Not Available]	#N/A	#N/A	#N/A	#N/A	[Not Available]	Negative	#N/A	0	350	0	350	0	350	0	350
888	TCGA-AO-A1KT	BRCA	78	FEMALE	WHITE	Stage IIA	[Not Applicable]	Infiltrating Ductal Carcinoma	[Not Available]	2009	Post (prior bilateral ovariectomy OR >12 mo since LMP with no prior hysterectomy)	-28660	Alive	TUMOR FREE	541	#N/A	[Not Available]	#N/A	#N/A	#N/A	#N/A	[Not Available]	Negative	#N/A	0	541	0	541	0	541	0	541
889	TCGA-AQ-A04H	BRCA	61	FEMALE	WHITE	Stage IIIA	[Not Applicable]	Infiltrating Ductal Carcinoma	[Not Available]	2009	Post (prior bilateral ovariectomy OR >12 mo since LMP with no prior hysterectomy)	-22539	Alive	TUMOR FREE	754	#N/A	[Not Available]	#N/A	#N/A	#N/A	#N/A	[Not Available]	Negative	#N/A	0	754	0	754	0	754	0	754
890	TCGA-AQ-A04J	BRCA	45	FEMALE	WHITE	Stage IIA	[Not Applicable]	Infiltrating Ductal Carcinoma	[Not Available]	2009	Pre (<6 months since LMP AND no prior bilateral ovariectomy AND not on estrogen replacement)	-16615	Alive	TUMOR FREE	819	#N/A	[Not Available]	#N/A	#N/A	#N/A	#N/A	[Not Available]	Negative	#N/A	0	819	0	819	0	819	0	819
891	TCGA-AQ-A04L	BRCA	48	FEMALE	WHITE	Stage IIA	[Not Applicable]	Infiltrating Ductal Carcinoma	[Not Available]	2001	Peri (6-12 months since last menstrual period)	-17759	Alive	TUMOR FREE	3957	#N/A	[Not Available]	#N/A	#N/A	#N/A	#N/A	[Not Available]	Negative	#N/A	0	3957	0	3957	0	3957	0	3957
892	TCGA-AQ-A0Y5	BRCA	70	FEMALE	WHITE	Stage IIIA	[Not Applicable]	Infiltrating Ductal Carcinoma	[Not Available]	2010	Post (prior bilateral ovariectomy OR >12 mo since LMP with no prior hysterectomy)	-25793	Dead	TUMOR FREE	#N/A	172	[Not Available]	#N/A	#N/A	#N/A	#N/A	[Not Available]	Negative	#N/A	1	172	0	172	0	172	0	172
893	TCGA-AQ-A1H2	BRCA	84	FEMALE	WHITE	Stage IIIA	[Not Applicable]	Infiltrating Ductal Carcinoma	[Not Available]	2010	Post (prior bilateral ovariectomy OR >12 mo since LMP with no prior hysterectomy)	-30958	Alive	TUMOR FREE	475	#N/A	[Not Available]	#N/A	#N/A	#N/A	#N/A	[Not Available]	Negative	#N/A	0	475	0	475	0	475	0	475
894	TCGA-AQ-A1H3	BRCA	49	FEMALE	WHITE	Stage IIIC	[Not Applicable]	Infiltrating Ductal Carcinoma	[Not Available]	2010	Pre (<6 months since LMP AND no prior bilateral ovariectomy AND not on estrogen replacement)	-18177	Alive	TUMOR FREE	989	#N/A	[Not Available]	#N/A	#N/A	#N/A	#N/A	[Not Available]	Negative	#N/A	0	989	0	989	0	989	0	989
895	TCGA-AQ-A54N	BRCA	51	FEMALE	BLACK OR AFRICAN AMERICAN	Stage IIA	[Not Applicable]	Infiltrating Ductal Carcinoma	[Not Available]	2011	Post (prior bilateral ovariectomy OR >12 mo since LMP with no prior hysterectomy)	-18741	Alive	TUMOR FREE	78	#N/A	[Not Available]	#N/A	#N/A	#N/A	#N/A	[Not Available]	Negative	#N/A	0	78	0	78	0	78	0	78
896	TCGA-AQ-A54O	BRCA	51	MALE	BLACK OR AFRICAN AMERICAN	Stage IIA	[Not Applicable]	Infiltrating Ductal Carcinoma	[Not Available]	2011	[Not Available]	-18694	Alive	TUMOR FREE	1001	#N/A	[Not Available]	#N/A	#N/A	#N/A	#N/A	[Not Available]	Negative	#N/A	0	1001	0	1001	0	1001	0	1001
897	TCGA-AQ-A7U7	BRCA	55	FEMALE	WHITE	Stage IIIA	[Not Applicable]	Infiltrating Lobular Carcinoma	[Not Available]	2013	Post (prior bilateral ovariectomy OR >12 mo since LMP with no prior hysterectomy)	-20239	Dead	TUMOR FREE	#N/A	584	[Not Available]	#N/A	#N/A	#N/A	#N/A	[Not Available]	Negative	#N/A	1	584	0	584	0	584	0	584
898	TCGA-AR-A0TP	BRCA	43	FEMALE	WHITE	Stage IIA	[Not Applicable]	Infiltrating Ductal Carcinoma	[Not Available]	2003	Pre (<6 months since LMP AND no prior bilateral ovariectomy AND not on estrogen replacement)	-15812	Alive	TUMOR FREE	4275	#N/A	[Not Available]	#N/A	#N/A	#N/A	#N/A	[Not Available]	Negative	#N/A	0	4275	0	4275	0	4275	0	4275
899	TCGA-AR-A0TQ	BRCA	27	FEMALE	WHITE	Stage IIIA	[Not Applicable]	Infiltrating Ductal Carcinoma	[Not Available]	2006	Pre (<6 months since LMP AND no prior bilateral ovariectomy AND not on estrogen replacement)	-9873	Alive	TUMOR FREE	2991	#N/A	[Not Available]	#N/A	#N/A	#N/A	#N/A	[Not Available]	Negative	#N/A	0	2991	0	2991	0	2991	0	2991
900	TCGA-AR-A0TR	BRCA	68	FEMALE	WHITE	Stage IIB	[Not Applicable]	Infiltrating Ductal Carcinoma	[Not Available]	2006	Post (prior bilateral ovariectomy OR >12 mo since LMP with no prior hysterectomy)	-25190	Dead	#N/A	#N/A	160	[Not Available]	#N/A	#N/A	#N/A	#N/A	[Not Available]	Negative	#N/A	1	160	#N/A	160	0	160	0	160
901	TCGA-AR-A0TS	BRCA	46	FEMALE	WHITE	Stage IIB	[Not Applicable]	Infiltrating Ductal Carcinoma	[Not Available]	2006	Pre (<6 months since LMP AND no prior bilateral ovariectomy AND not on estrogen replacement)	-17141	Alive	TUMOR FREE	2558	#N/A	[Not Available]	#N/A	#N/A	#N/A	#N/A	[Not Available]	Negative	#N/A	0	2558	0	2558	0	2558	0	2558
902	TCGA-AR-A0TT	BRCA	53	FEMALE	BLACK OR AFRICAN AMERICAN	Stage IIIA	[Not Applicable]	Infiltrating Ductal Carcinoma	[Not Available]	2006	Pre (<6 months since LMP AND no prior bilateral ovariectomy AND not on estrogen replacement)	-19679	Alive	TUMOR FREE	3316	#N/A	[Not Available]	#N/A	#N/A	#N/A	#N/A	[Not Available]	Negative	#N/A	0	3316	0	3316	0	3316	0	3316
903	TCGA-AR-A0TU	BRCA	35	FEMALE	[Not Available]	Stage IIA	[Not Applicable]	Infiltrating Ductal Carcinoma	[Not Available]	2006	Pre (<6 months since LMP AND no prior bilateral ovariectomy AND not on estrogen replacement)	-13039	Alive	TUMOR FREE	709	#N/A	[Not Available]	#N/A	#N/A	#N/A	#N/A	[Not Available]	Negative	#N/A	0	709	0	709	0	709	0	709
904	TCGA-AR-A0TV	BRCA	66	FEMALE	[Not Available]	Stage IIA	[Not Applicable]	Infiltrating Ductal Carcinoma	[Not Available]	2005	Post (prior bilateral ovariectomy OR >12 mo since LMP with no prior hysterectomy)	-24279	Alive	TUMOR FREE	2288	#N/A	[Not Available]	#N/A	#N/A	#N/A	#N/A	[Not Available]	Negative	#N/A	0	2288	0	2288	0	2288	0	2288
905	TCGA-AR-A0TW	BRCA	50	FEMALE	WHITE	Stage IIIA	[Not Applicable]	Infiltrating Ductal Carcinoma	[Not Available]	2005	Pre (<6 months since LMP AND no prior bilateral ovariectomy AND not on estrogen replacement)	-18263	Alive	TUMOR FREE	3009	#N/A	[Not Available]	#N/A	#N/A	#N/A	739	[Not Available]	Negative	#N/A	0	3009	0	3009	1	739	1	739
906	TCGA-AR-A0TX	BRCA	64	FEMALE	[Not Available]	Stage IIA	[Not Applicable]	Infiltrating Ductal Carcinoma	[Not Available]	2005	Post (prior bilateral ovariectomy OR >12 mo since LMP with no prior hysterectomy)	-23653	Alive	TUMOR FREE	1972	#N/A	[Not Available]	#N/A	#N/A	#N/A	#N/A	[Not Available]	Negative	#N/A	0	1972	0	1972	0	1972	0	1972
907	TCGA-AR-A0TY	BRCA	54	FEMALE	WHITE	Stage IIA	[Not Applicable]	Infiltrating Ductal Carcinoma	[Not Available]	2004	Post (prior bilateral ovariectomy OR >12 mo since LMP with no prior hysterectomy)	-19836	Dead	WITH TUMOR	#N/A	1699	[Not Available]	Distant Metastasis	Bone	#N/A	544	[Not Available]	Negative	#N/A	1	1699	1	1699	1	544	1	544
908	TCGA-AR-A0TZ	BRCA	43	FEMALE	WHITE	[Discrepancy]	[Not Applicable]	Infiltrating Ductal Carcinoma	[Not Available]	2004	Pre (<6 months since LMP AND no prior bilateral ovariectomy AND not on estrogen replacement)	-15720	Dead	#N/A	#N/A	3262	[Not Available]	Distant Metastasis	Bone	#N/A	1313	[Not Available]	Negative	#N/A	1	3262	#N/A	3262	1	1313	1	1313
909	TCGA-AR-A0U0	BRCA	73	FEMALE	WHITE	Stage IIB	[Not Applicable]	Infiltrating Ductal Carcinoma	[Not Available]	2004	Post (prior bilateral ovariectomy OR >12 mo since LMP with no prior hysterectomy)	-26993	Alive	TUMOR FREE	1988	#N/A	[Not Available]	#N/A	#N/A	#N/A	#N/A	[Not Available]	Negative	#N/A	0	1988	0	1988	0	1988	0	1988
910	TCGA-AR-A0U1	BRCA	36	FEMALE	WHITE	Stage IIB	[Not Applicable]	Infiltrating Ductal Carcinoma	[Not Available]	2004	Pre (<6 months since LMP AND no prior bilateral ovariectomy AND not on estrogen replacement)	-13467	Alive	TUMOR FREE	4052	#N/A	[Not Available]	#N/A	#N/A	#N/A	#N/A	[Not Available]	Negative	#N/A	0	4052	0	4052	0	4052	0	4052	Redacted
911	TCGA-AR-A0U2	BRCA	47	FEMALE	WHITE	Stage IIIA	[Not Applicable]	Infiltrating Ductal Carcinoma	[Not Available]	2004	Pre (<6 months since LMP AND no prior bilateral ovariectomy AND not on estrogen replacement)	-17390	Dead	WITH TUMOR	#N/A	2551	[Not Available]	Distant Metastasis	Bone	Liver	1609	[Not Available]	Negative	#N/A	1	2551	1	2551	1	1609	1	1609
912	TCGA-AR-A0U3	BRCA	59	FEMALE	WHITE	Stage IIB	[Not Applicable]	Infiltrating Ductal Carcinoma	[Not Available]	2004	Post (prior bilateral ovariectomy OR >12 mo since LMP with no prior hysterectomy)	-21755	Alive	TUMOR FREE	4080	#N/A	[Not Available]	#N/A	#N/A	#N/A	#N/A	[Not Available]	Negative	#N/A	0	4080	0	4080	0	4080	0	4080
913	TCGA-AR-A0U4	BRCA	54	FEMALE	WHITE	Stage IIA	[Not Applicable]	Infiltrating Ductal Carcinoma	[Not Available]	2006	Pre (<6 months since LMP AND no prior bilateral ovariectomy AND not on estrogen replacement)	-19729	Alive	TUMOR FREE	3261	#N/A	[Not Available]	#N/A	#N/A	#N/A	#N/A	[Not Available]	Negative	#N/A	0	3261	0	3261	0	3261	0	3261
914	TCGA-AR-A1AH	BRCA	51	FEMALE	WHITE	Stage IIB	[Not Applicable]	Infiltrating Ductal Carcinoma	[Not Available]	2004	Post (prior bilateral ovariectomy OR >12 mo since LMP with no prior hysterectomy)	-18991	Alive	TUMOR FREE	3807	#N/A	[Not Available]	New Primary Tumor	Other, specify	Renal	1136	[Not Available]	Negative	#N/A	0	3807	0	3807	0	3807	1	1136
915	TCGA-AR-A1AI	BRCA	47	FEMALE	WHITE	Stage IIA	[Not Applicable]	Medullary Carcinoma	[Not Available]	2005	Post (prior bilateral ovariectomy OR >12 mo since LMP with no prior hysterectomy)	-17229	Alive	TUMOR FREE	3296	#N/A	[Not Available]	New Primary Tumor	Other, specify	Contralateral Breast	588	[Not Available]	Negative	#N/A	0	3296	0	3296	1	588	1	588
916	TCGA-AR-A1AJ	BRCA	83	FEMALE	WHITE	Stage I	[Not Applicable]	Infiltrating Ductal Carcinoma	[Not Available]	2005	Post (prior bilateral ovariectomy OR >12 mo since LMP with no prior hysterectomy)	-30489	Alive	TUMOR FREE	3072	#N/A	[Not Available]	#N/A	#N/A	#N/A	#N/A	[Not Available]	Negative	#N/A	0	3072	0	3072	0	3072	0	3072
917	TCGA-AR-A1AK	BRCA	70	FEMALE	WHITE	Stage I	[Not Applicable]	Infiltrating Lobular Carcinoma	[Not Available]	2006	Post (prior bilateral ovariectomy OR >12 mo since LMP with no prior hysterectomy)	-25825	Alive	TUMOR FREE	3159	#N/A	[Not Available]	#N/A	#N/A	#N/A	#N/A	[Not Available]	Negative	#N/A	0	3159	0	3159	0	3159	0	3159
918	TCGA-AR-A1AL	BRCA	60	FEMALE	WHITE	Stage IIIA	[Not Applicable]	Infiltrating Lobular Carcinoma	[Not Available]	2006	Post (prior bilateral ovariectomy OR >12 mo since LMP with no prior hysterectomy)	-22023	Alive	TUMOR FREE	2971	#N/A	[Not Available]	#N/A	#N/A	#N/A	#N/A	[Not Available]	Negative	#N/A	0	2971	0	2971	0	2971	0	2971
919	TCGA-AR-A1AM	BRCA	52	FEMALE	WHITE	Stage IIIA	[Not Applicable]	Infiltrating Lobular Carcinoma	[Not Available]	2006	Post (prior bilateral ovariectomy OR >12 mo since LMP with no prior hysterectomy)	-19123	Alive	TUMOR FREE	2991	#N/A	[Not Available]	#N/A	#N/A	#N/A	#N/A	[Not Available]	Negative	#N/A	0	2991	0	2991	0	2991	0	2991
920	TCGA-AR-A1AN	BRCA	46	FEMALE	WHITE	Stage IIA	[Not Applicable]	Infiltrating Ductal Carcinoma	[Not Available]	2006	Pre (<6 months since LMP AND no prior bilateral ovariectomy AND not on estrogen replacement)	-16974	Alive	TUMOR FREE	2920	#N/A	[Not Available]	#N/A	#N/A	#N/A	#N/A	[Not Available]	Negative	#N/A	0	2920	0	2920	0	2920	0	2920
921	TCGA-AR-A1AO	BRCA	47	FEMALE	WHITE	Stage IIA	[Not Applicable]	Infiltrating Ductal Carcinoma	[Not Available]	2006	Pre (<6 months since LMP AND no prior bilateral ovariectomy AND not on estrogen replacement)	-17332	Alive	TUMOR FREE	2618	#N/A	[Not Available]	#N/A	#N/A	#N/A	#N/A	[Not Available]	Negative	#N/A	0	2618	0	2618	0	2618	0	2618
922	TCGA-AR-A1AP	BRCA	80	FEMALE	WHITE	Stage I	[Not Applicable]	Infiltrating Ductal Carcinoma	[Not Available]	2007	Post (prior bilateral ovariectomy OR >12 mo since LMP with no prior hysterectomy)	-29406	Alive	TUMOR FREE	2856	#N/A	[Not Available]	#N/A	#N/A	#N/A	#N/A	[Not Available]	Negative	#N/A	0	2856	0	2856	0	2856	0	2856
923	TCGA-AR-A1AQ	BRCA	49	FEMALE	WHITE	Stage IIA	[Not Applicable]	Infiltrating Ductal Carcinoma	[Not Available]	2007	Post (prior bilateral ovariectomy OR >12 mo since LMP with no prior hysterectomy)	-18109	Alive	TUMOR FREE	3021	#N/A	[Not Available]	#N/A	#N/A	#N/A	#N/A	[Not Available]	Negative	#N/A	0	3021	0	3021	0	3021	0	3021
924	TCGA-AR-A1AR	BRCA	50	FEMALE	WHITE	Stage IIIA	[Not Applicable]	Infiltrating Ductal Carcinoma	[Not Available]	2007	Post (prior bilateral ovariectomy OR >12 mo since LMP with no prior hysterectomy)	-18482	Dead	WITH TUMOR	#N/A	524	[Not Available]	New Primary Tumor	Other, specify	Breast	268	[Not Available]	Negative	#N/A	1	524	1	524	1	268	1	268
925	TCGA-AR-A1AS	BRCA	54	FEMALE	ASIAN	Stage IIB	[Not Applicable]	Infiltrating Ductal Carcinoma	[Not Available]	2007	Post (prior bilateral ovariectomy OR >12 mo since LMP with no prior hysterectomy)	-20028	Alive	TUMOR FREE	1150	#N/A	[Not Available]	#N/A	#N/A	#N/A	#N/A	[Not Available]	Negative	#N/A	0	1150	0	1150	0	1150	0	1150
926	TCGA-AR-A1AT	BRCA	62	FEMALE	WHITE	Stage IIA	[Not Applicable]	Infiltrating Lobular Carcinoma	[Not Available]	2007	Post (prior bilateral ovariectomy OR >12 mo since LMP with no prior hysterectomy)	-22942	Dead	#N/A	#N/A	1272	[Not Available]	#N/A	#N/A	#N/A	#N/A	[Not Available]	Negative	#N/A	1	1272	#N/A	1272	0	1272	0	1272
927	TCGA-AR-A1AU	BRCA	39	FEMALE	WHITE	Stage IIIA	[Not Applicable]	Infiltrating Ductal Carcinoma	[Not Available]	2007	Pre (<6 months since LMP AND no prior bilateral ovariectomy AND not on estrogen replacement)	-14564	Alive	TUMOR FREE	2868	#N/A	[Not Available]	#N/A	#N/A	#N/A	#N/A	[Not Available]	Negative	#N/A	0	2868	0	2868	0	2868	0	2868
928	TCGA-AR-A1AV	BRCA	68	MALE	WHITE	Stage IIB	[Not Applicable]	Infiltrating Ductal Carcinoma	[Not Available]	2007	[Not Available]	-24875	Alive	TUMOR FREE	1864	#N/A	[Not Available]	#N/A	#N/A	#N/A	#N/A	[Not Available]	Negative	#N/A	0	1864	0	1864	0	1864	0	1864
929	TCGA-AR-A1AW	BRCA	65	FEMALE	WHITE	Stage IIA	[Not Applicable]	Infiltrating Ductal Carcinoma	[Not Available]	2007	Post (prior bilateral ovariectomy OR >12 mo since LMP with no prior hysterectomy)	-23855	Alive	TUMOR FREE	2632	#N/A	[Not Available]	#N/A	#N/A	#N/A	#N/A	[Not Available]	Negative	#N/A	0	2632	0	2632	0	2632	0	2632
930	TCGA-AR-A1AX	BRCA	64	FEMALE	WHITE	Stage I	[Not Applicable]	Infiltrating Ductal Carcinoma	[Not Available]	2007	Post (prior bilateral ovariectomy OR >12 mo since LMP with no prior hysterectomy)	-23507	Alive	TUMOR FREE	2629	#N/A	[Not Available]	#N/A	#N/A	#N/A	#N/A	[Not Available]	Negative	#N/A	0	2629	0	2629	0	2629	0	2629
931	TCGA-AR-A1AY	BRCA	65	FEMALE	WHITE	Stage I	[Not Applicable]	Infiltrating Ductal Carcinoma	[Not Available]	2008	Post (prior bilateral ovariectomy OR >12 mo since LMP with no prior hysterectomy)	-23927	Alive	TUMOR FREE	1026	#N/A	[Not Available]	#N/A	#N/A	#N/A	#N/A	[Not Available]	Negative	#N/A	0	1026	0	1026	0	1026	0	1026
932	TCGA-AR-A24H	BRCA	65	FEMALE	WHITE	Stage IIA	[Not Applicable]	Infiltrating Lobular Carcinoma	[Not Available]	2001	Post (prior bilateral ovariectomy OR >12 mo since LMP with no prior hysterectomy)	-24046	Alive	TUMOR FREE	4894	#N/A	[Not Available]	#N/A	#N/A	#N/A	#N/A	[Not Available]	Negative	#N/A	0	4894	0	4894	0	4894	0	4894
933	TCGA-AR-A24K	BRCA	46	FEMALE	WHITE	Stage IIA	[Not Applicable]	Infiltrating Ductal Carcinoma	[Not Available]	2004	Pre (<6 months since LMP AND no prior bilateral ovariectomy AND not on estrogen replacement)	-16961	Alive	TUMOR FREE	1548	#N/A	[Not Available]	#N/A	#N/A	#N/A	#N/A	[Not Available]	Negative	#N/A	0	1548	0	1548	0	1548	0	1548
934	TCGA-AR-A24L	BRCA	26	FEMALE	WHITE	Stage IIB	[Not Applicable]	Infiltrating Ductal Carcinoma	[Not Available]	2005	Pre (<6 months since LMP AND no prior bilateral ovariectomy AND not on estrogen replacement)	-9706	Dead	WITH TUMOR	#N/A	2866	[Not Available]	Locoregional Disease	#N/A	#N/A	1414	[Not Available]	Negative	#N/A	1	2866	1	2866	1	1414	1	1414
935	TCGA-AR-A24M	BRCA	38	FEMALE	WHITE	Stage IIIA	[Not Applicable]	Mixed Histology (please specify)	[Not Available]	2005	Pre (<6 months since LMP AND no prior bilateral ovariectomy AND not on estrogen replacement)	-14119	Alive	TUMOR FREE	3660	#N/A	[Not Available]	#N/A	#N/A	#N/A	#N/A	[Not Available]	Negative	#N/A	0	3660	0	3660	0	3660	0	3660
936	TCGA-AR-A24N	BRCA	54	FEMALE	WHITE	Stage I	[Not Applicable]	Infiltrating Ductal Carcinoma	[Not Available]	2005	Peri (6-12 months since last menstrual period)	-19989	Alive	TUMOR FREE	3035	#N/A	[Not Available]	#N/A	#N/A	#N/A	#N/A	[Not Available]	Negative	#N/A	0	3035	0	3035	0	3035	0	3035
937	TCGA-AR-A24O	BRCA	43	FEMALE	WHITE	Stage IIIA	[Not Applicable]	Mixed Histology (please specify)	[Not Available]	2005	Pre (<6 months since LMP AND no prior bilateral ovariectomy AND not on estrogen replacement)	-15977	Alive	WITH TUMOR	3607	#N/A	[Not Available]	#N/A	#N/A	#N/A	2561	[Not Available]	Negative	#N/A	0	3607	0	3607	1	2561	1	2561
938	TCGA-AR-A24P	BRCA	47	FEMALE	WHITE	Stage I	[Not Applicable]	Infiltrating Ductal Carcinoma	[Not Available]	2005	Post (prior bilateral ovariectomy OR >12 mo since LMP with no prior hysterectomy)	-17490	Alive	#N/A	84	#N/A	[Not Available]	#N/A	#N/A	#N/A	#N/A	[Not Available]	Negative	#N/A	0	84	0	84	0	84	0	84
939	TCGA-AR-A24Q	BRCA	49	FEMALE	WHITE	Stage IIB	[Not Applicable]	Infiltrating Ductal Carcinoma	[Not Available]	2006	Post (prior bilateral ovariectomy OR >12 mo since LMP with no prior hysterectomy)	-18084	Alive	TUMOR FREE	3172	#N/A	[Not Available]	#N/A	#N/A	#N/A	#N/A	[Not Available]	Negative	#N/A	0	3172	0	3172	0	3172	0	3172
940	TCGA-AR-A24R	BRCA	45	FEMALE	WHITE	Stage IIIA	[Not Applicable]	Infiltrating Ductal Carcinoma	[Not Available]	2006	Pre (<6 months since LMP AND no prior bilateral ovariectomy AND not on estrogen replacement)	-16642	Alive	TUMOR FREE	3430	#N/A	[Not Available]	#N/A	#N/A	#N/A	#N/A	[Not Available]	Negative	#N/A	0	3430	0	3430	0	3430	0	3430
941	TCGA-AR-A24S	BRCA	61	FEMALE	WHITE	Stage I	[Not Applicable]	Infiltrating Ductal Carcinoma	[Not Available]	2006	Post (prior bilateral ovariectomy OR >12 mo since LMP with no prior hysterectomy)	-22587	Alive	#N/A	2976	#N/A	[Not Available]	#N/A	#N/A	#N/A	#N/A	[Not Available]	Negative	#N/A	0	2976	0	2976	0	2976	0	2976
942	TCGA-AR-A24T	BRCA	46	FEMALE	WHITE	Stage IIIC	[Not Applicable]	Infiltrating Lobular Carcinoma	[Not Available]	2006	Pre (<6 months since LMP AND no prior bilateral ovariectomy AND not on estrogen replacement)	-17135	Alive	TUMOR FREE	3202	#N/A	[Not Available]	#N/A	#N/A	#N/A	#N/A	[Not Available]	Negative	#N/A	0	3202	0	3202	0	3202	0	3202
943	TCGA-AR-A24U	BRCA	47	FEMALE	WHITE	Stage IIA	[Not Applicable]	Infiltrating Ductal Carcinoma	[Not Available]	2006	Pre (<6 months since LMP AND no prior bilateral ovariectomy AND not on estrogen replacement)	-17523	Alive	TUMOR FREE	3128	#N/A	[Not Available]	#N/A	#N/A	#N/A	#N/A	[Not Available]	Negative	#N/A	0	3128	0	3128	0	3128	0	3128
944	TCGA-AR-A24V	BRCA	52	FEMALE	WHITE	Stage IIB	[Not Applicable]	Infiltrating Ductal Carcinoma	[Not Available]	2006	Peri (6-12 months since last menstrual period)	-19027	Alive	TUMOR FREE	3203	#N/A	[Not Available]	#N/A	#N/A	#N/A	#N/A	[Not Available]	Negative	#N/A	0	3203	0	3203	0	3203	0	3203
945	TCGA-AR-A24W	BRCA	55	FEMALE	WHITE	Stage IIB	[Not Applicable]	Infiltrating Ductal Carcinoma	[Not Available]	2006	Post (prior bilateral ovariectomy OR >12 mo since LMP with no prior hysterectomy)	-20123	Alive	TUMOR FREE	1550	#N/A	[Not Available]	#N/A	#N/A	#N/A	#N/A	[Not Available]	Negative	#N/A	0	1550	0	1550	0	1550	0	1550
946	TCGA-AR-A24X	BRCA	52	FEMALE	WHITE	Stage IIA	[Not Applicable]	Mixed Histology (please specify)	[Not Available]	2006	Pre (<6 months since LMP AND no prior bilateral ovariectomy AND not on estrogen replacement)	-19030	Alive	TUMOR FREE	3004	#N/A	[Not Available]	#N/A	#N/A	#N/A	#N/A	[Not Available]	Negative	#N/A	0	3004	0	3004	0	3004	0	3004
947	TCGA-AR-A24Z	BRCA	57	FEMALE	WHITE	Stage IIA	[Not Applicable]	Infiltrating Ductal Carcinoma	[Not Available]	2006	Post (prior bilateral ovariectomy OR >12 mo since LMP with no prior hysterectomy)	-20900	Alive	TUMOR FREE	3001	#N/A	[Not Available]	#N/A	#N/A	#N/A	#N/A	[Not Available]	Negative	#N/A	0	3001	0	3001	0	3001	0	3001
948	TCGA-AR-A250	BRCA	58	FEMALE	WHITE	Stage IIA	[Not Applicable]	Infiltrating Ductal Carcinoma	[Not Available]	2006	Post (prior bilateral ovariectomy OR >12 mo since LMP with no prior hysterectomy)	-21309	Alive	TUMOR FREE	2707	#N/A	[Not Available]	#N/A	#N/A	#N/A	#N/A	[Not Available]	Negative	#N/A	0	2707	0	2707	0	2707	0	2707
949	TCGA-AR-A251	BRCA	51	FEMALE	WHITE	Stage IIIA	[Not Applicable]	Infiltrating Ductal Carcinoma	[Not Available]	2006	Pre (<6 months since LMP AND no prior bilateral ovariectomy AND not on estrogen replacement)	-18771	Alive	TUMOR FREE	3030	#N/A	[Not Available]	#N/A	#N/A	#N/A	#N/A	[Not Available]	Negative	#N/A	0	3030	0	3030	0	3030	0	3030
950	TCGA-AR-A252	BRCA	50	FEMALE	WHITE	Stage I	[Not Applicable]	Infiltrating Ductal Carcinoma	[Not Available]	2007	Pre (<6 months since LMP AND no prior bilateral ovariectomy AND not on estrogen replacement)	-18611	Alive	TUMOR FREE	2838	#N/A	[Not Available]	#N/A	#N/A	#N/A	#N/A	[Not Available]	Negative	#N/A	0	2838	0	2838	0	2838	0	2838
951	TCGA-AR-A254	BRCA	50	FEMALE	WHITE	Stage IIIA	[Not Applicable]	Infiltrating Ductal Carcinoma	[Not Available]	2007	Pre (<6 months since LMP AND no prior bilateral ovariectomy AND not on estrogen replacement)	-18270	Alive	TUMOR FREE	2605	#N/A	[Not Available]	#N/A	#N/A	#N/A	#N/A	[Not Available]	Negative	#N/A	0	2605	0	2605	0	2605	0	2605
952	TCGA-AR-A255	BRCA	62	FEMALE	WHITE	Stage I	[Not Applicable]	Infiltrating Ductal Carcinoma	[Not Available]	2007	Post (prior bilateral ovariectomy OR >12 mo since LMP with no prior hysterectomy)	-22809	Alive	TUMOR FREE	2161	#N/A	[Not Available]	#N/A	#N/A	#N/A	#N/A	[Not Available]	Negative	#N/A	0	2161	0	2161	0	2161	0	2161
953	TCGA-AR-A256	BRCA	45	FEMALE	WHITE	Stage IIA	[Not Applicable]	Infiltrating Ductal Carcinoma	[Not Available]	2001	Pre (<6 months since LMP AND no prior bilateral ovariectomy AND not on estrogen replacement)	-16642	Dead	#N/A	#N/A	2854	[Not Available]	Locoregional Disease	#N/A	#N/A	1640	[Not Available]	Negative	#N/A	1	2854	#N/A	2854	1	1640	1	1640
954	TCGA-AR-A2LE	BRCA	69	FEMALE	WHITE	Stage I	[Not Applicable]	Infiltrating Lobular Carcinoma	[Not Available]	2001	Post (prior bilateral ovariectomy OR >12 mo since LMP with no prior hysterectomy)	-25499	Alive	TUMOR FREE	5062	#N/A	[Not Available]	New Primary Tumor	Other, specify	Endometrium	4203	[Not Available]	Negative	#N/A	0	5062	0	5062	0	5062	1	4203
955	TCGA-AR-A2LH	BRCA	55	FEMALE	WHITE	Stage III	[Not Applicable]	Infiltrating Lobular Carcinoma	[Not Available]	2007	Post (prior bilateral ovariectomy OR >12 mo since LMP with no prior hysterectomy)	-20288	Dead	#N/A	#N/A	616	[Not Available]	Distant Metastasis	Bone	#N/A	434	[Not Available]	Negative	#N/A	1	616	#N/A	616	1	434	1	434
956	TCGA-AR-A2LJ	BRCA	40	FEMALE	WHITE	Stage IIIA	[Not Applicable]	Infiltrating Lobular Carcinoma	[Not Available]	2007	Pre (<6 months since LMP AND no prior bilateral ovariectomy AND not on estrogen replacement)	-14723	Alive	TUMOR FREE	2632	#N/A	[Not Available]	#N/A	#N/A	#N/A	#N/A	[Not Available]	Negative	#N/A	0	2632	0	2632	0	2632	0	2632
957	TCGA-AR-A2LK	BRCA	62	FEMALE	WHITE	Stage III	[Not Applicable]	Infiltrating Lobular Carcinoma	[Not Available]	2007	Post (prior bilateral ovariectomy OR >12 mo since LMP with no prior hysterectomy)	-22800	Dead	#N/A	#N/A	1649	[Not Available]	Distant Metastasis	Bone	#N/A	1304	[Not Available]	Negative	#N/A	1	1649	#N/A	1649	1	1304	1	1304
958	TCGA-AR-A2LL	BRCA	70	FEMALE	WHITE	Stage IIB	[Not Applicable]	Infiltrating Lobular Carcinoma	[Not Available]	2007	Post (prior bilateral ovariectomy OR >12 mo since LMP with no prior hysterectomy)	-25747	Alive	TUMOR FREE	2012	#N/A	[Not Available]	#N/A	#N/A	#N/A	#N/A	[Not Available]	Negative	#N/A	0	2012	0	2012	0	2012	0	2012
959	TCGA-AR-A2LM	BRCA	49	FEMALE	WHITE	Stage II	[Not Applicable]	Infiltrating Lobular Carcinoma	[Not Available]	2007	Pre (<6 months since LMP AND no prior bilateral ovariectomy AND not on estrogen replacement)	-18053	Alive	TUMOR FREE	1935	#N/A	[Not Available]	#N/A	#N/A	#N/A	#N/A	[Not Available]	Negative	#N/A	0	1935	0	1935	0	1935	0	1935
960	TCGA-AR-A2LN	BRCA	65	FEMALE	WHITE	Stage IIA	[Not Applicable]	Infiltrating Lobular Carcinoma	[Not Available]	2010	Post (prior bilateral ovariectomy OR >12 mo since LMP with no prior hysterectomy)	-23992	Alive	TUMOR FREE	1161	#N/A	[Not Available]	#N/A	#N/A	#N/A	#N/A	[Not Available]	Negative	#N/A	0	1161	0	1161	0	1161	0	1161
961	TCGA-AR-A2LO	BRCA	46	FEMALE	WHITE	Stage IIB	[Not Applicable]	Infiltrating Lobular Carcinoma	[Not Available]	2010	Pre (<6 months since LMP AND no prior bilateral ovariectomy AND not on estrogen replacement)	-17080	Alive	TUMOR FREE	1198	#N/A	[Not Available]	#N/A	#N/A	#N/A	#N/A	[Not Available]	Negative	#N/A	0	1198	0	1198	0	1198	0	1198
962	TCGA-AR-A2LQ	BRCA	59	FEMALE	WHITE	Stage IIB	[Not Applicable]	Infiltrating Lobular Carcinoma	[Not Available]	2010	Post (prior bilateral ovariectomy OR >12 mo since LMP with no prior hysterectomy)	-21865	Alive	TUMOR FREE	1233	#N/A	[Not Available]	#N/A	#N/A	#N/A	#N/A	[Not Available]	Negative	#N/A	0	1233	0	1233	0	1233	0	1233
963	TCGA-AR-A2LR	BRCA	49	FEMALE	WHITE	Stage I	[Not Applicable]	Metaplastic Carcinoma	[Not Available]	2010	Post (prior bilateral ovariectomy OR >12 mo since LMP with no prior hysterectomy)	-18214	Alive	TUMOR FREE	1742	#N/A	[Not Available]	#N/A	#N/A	#N/A	#N/A	[Not Available]	Negative	#N/A	0	1742	0	1742	0	1742	0	1742
964	TCGA-AR-A5QM	BRCA	62	FEMALE	WHITE	Stage IIA	[Not Applicable]	Infiltrating Lobular Carcinoma	[Not Available]	2008	Post (prior bilateral ovariectomy OR >12 mo since LMP with no prior hysterectomy)	-22780	Alive	TUMOR FREE	2231	#N/A	[Not Available]	New Primary Tumor	Other, specify	Malignant melanoma	968	[Not Available]	[Not Available]	#N/A	0	2231	0	2231	#N/A	#N/A	1	968
965	TCGA-AR-A5QN	BRCA	68	FEMALE	WHITE	Stage IIIC	[Not Applicable]	Infiltrating Lobular Carcinoma	[Not Available]	2012	Post (prior bilateral ovariectomy OR >12 mo since LMP with no prior hysterectomy)	-25089	Alive	TUMOR FREE	1013	#N/A	[Not Available]	#N/A	#N/A	#N/A	#N/A	[Not Available]	[Not Available]	#N/A	0	1013	0	1013	#N/A	#N/A	0	1013
966	TCGA-AR-A5QP	BRCA	54	FEMALE	WHITE	Stage IIB	[Not Applicable]	Infiltrating Lobular Carcinoma	[Not Available]	2011	Post (prior bilateral ovariectomy OR >12 mo since LMP with no prior hysterectomy)	-19805	Alive	TUMOR FREE	1185	#N/A	[Not Available]	#N/A	#N/A	#N/A	#N/A	[Not Available]	[Not Available]	#N/A	0	1185	0	1185	#N/A	#N/A	0	1185
967	TCGA-AR-A5QQ	BRCA	68	FEMALE	WHITE	Stage IIIA	[Not Applicable]	Other, specify	[Not Available]	2011	Post (prior bilateral ovariectomy OR >12 mo since LMP with no prior hysterectomy)	-24841	Dead	WITH TUMOR	#N/A	322	[Not Available]	Distant Metastasis	Lung	Liver, bone, chest wall, adrenal glands	301	[Not Available]	[Not Available]	#N/A	1	322	1	322	#N/A	#N/A	1	301
968	TCGA-B6-A0I1	BRCA	73	FEMALE	BLACK OR AFRICAN AMERICAN	Stage IIA	[Not Applicable]	Infiltrating Ductal Carcinoma	[Not Available]	1998	Post (prior bilateral ovariectomy OR >12 mo since LMP with no prior hysterectomy)	-26902	Dead	TUMOR FREE	#N/A	2361	[Not Available]	Distant Metastasis	Lung	#N/A	1120	[Not Available]	Negative	#N/A	1	2361	0	2361	1	1120	1	1120
969	TCGA-B6-A0I2	BRCA	45	FEMALE	WHITE	Stage IA	[Not Applicable]	Infiltrating Ductal Carcinoma	[Not Available]	1995	Indeterminate (neither Pre or Postmenopausal)	-16702	Alive	TUMOR FREE	4361	#N/A	[Not Available]	#N/A	#N/A	#N/A	#N/A	[Not Available]	[Not Available]	#N/A	0	4361	0	4361	#N/A	#N/A	0	4361
970	TCGA-B6-A0I5	BRCA	49	FEMALE	WHITE	Stage IIB	[Not Applicable]	Infiltrating Ductal Carcinoma	[Not Available]	1988	Indeterminate (neither Pre or Postmenopausal)	-18038	Alive	TUMOR FREE	8556	#N/A	[Not Available]	#N/A	#N/A	#N/A	#N/A	[Not Available]	Negative	#N/A	0	8556	0	8556	0	8556	0	8556
971	TCGA-B6-A0I6	BRCA	49	FEMALE	BLACK OR AFRICAN AMERICAN	Stage IIA	[Not Applicable]	Infiltrating Ductal Carcinoma	[Not Available]	1990	Indeterminate (neither Pre or Postmenopausal)	-18014	Dead	WITH TUMOR	#N/A	991	[Not Available]	Distant Metastasis	Other, specify	Skin and bone	859	[Not Available]	Negative	#N/A	1	991	1	991	1	859	1	859
972	TCGA-B6-A0I8	BRCA	46	FEMALE	WHITE	Stage X	[Not Applicable]	Infiltrating Ductal Carcinoma	[Not Available]	1992	Indeterminate (neither Pre or Postmenopausal)	-17073	Dead	WITH TUMOR	#N/A	749	[Not Available]	Locoregional Disease	Other, specify	Pectoral muscle	746	[Not Available]	[Not Available]	#N/A	1	749	1	749	#N/A	#N/A	1	746
973	TCGA-B6-A0I9	BRCA	62	FEMALE	WHITE	Stage IV	[Not Applicable]	Infiltrating Ductal Carcinoma	[Not Available]	1992	Indeterminate (neither Pre or Postmenopausal)	-22798	Dead	WITH TUMOR	#N/A	362	[Not Available]	#N/A	#N/A	#N/A	#N/A	[Not Available]	[Not Available]	#N/A	1	362	1	362	#N/A	#N/A	1	362
974	TCGA-B6-A0IA	BRCA	51	FEMALE	WHITE	Stage IIA	[Not Applicable]	Other, specify	[Not Available]	1992	Indeterminate (neither Pre or Postmenopausal)	-18748	Alive	TUMOR FREE	8391	#N/A	[Not Available]	#N/A	#N/A	#N/A	#N/A	[Not Available]	Negative	#N/A	0	8391	0	8391	0	8391	0	8391
975	TCGA-B6-A0IB	BRCA	64	FEMALE	WHITE	Stage IV	[Not Applicable]	Infiltrating Ductal Carcinoma	[Not Available]	1992	Indeterminate (neither Pre or Postmenopausal)	-23646	Dead	WITH TUMOR	#N/A	3941	[Not Available]	Distant Metastasis	Other, specify	lung, bone, liver	2717	[Not Available]	Negative	#N/A	1	3941	1	3941	#N/A	#N/A	1	2717
976	TCGA-B6-A0IC	BRCA	90	FEMALE	WHITE	Stage X	[Not Applicable]	Other, specify	[Not Available]	1992	Post (prior bilateral ovariectomy OR >12 mo since LMP with no prior hysterectomy)	-32872	Dead	TUMOR FREE	#N/A	1542	[Not Available]	#N/A	#N/A	#N/A	#N/A	[Not Available]	Negative	#N/A	1	1542	0	1542	0	1542	0	1542
977	TCGA-B6-A0IE	BRCA	38	FEMALE	BLACK OR AFRICAN AMERICAN	Stage IIIA	[Not Applicable]	Mixed Histology (please specify)	[Not Available]	1995	Pre (<6 months since LMP AND no prior bilateral ovariectomy AND not on estrogen replacement)	-13982	Dead	WITH TUMOR	#N/A	1993	[Not Available]	Distant Metastasis	Bone	#N/A	834	[Not Available]	Negative	#N/A	1	1993	1	1993	1	834	1	834
978	TCGA-B6-A0IG	BRCA	50	FEMALE	WHITE	Stage IIB	[Not Applicable]	Infiltrating Ductal Carcinoma	[Not Available]	1994	Indeterminate (neither Pre or Postmenopausal)	-18433	Dead	WITH TUMOR	#N/A	4456	[Not Available]	#N/A	#N/A	#N/A	#N/A	[Not Available]	Negative	#N/A	1	4456	1	4456	#N/A	#N/A	1	4456
979	TCGA-B6-A0IH	BRCA	81	FEMALE	WHITE	Stage IIIA	[Not Applicable]	Infiltrating Lobular Carcinoma	[Not Available]	1995	Post (prior bilateral ovariectomy OR >12 mo since LMP with no prior hysterectomy)	-29907	Dead	#N/A	#N/A	3418	[Not Available]	#N/A	#N/A	#N/A	#N/A	[Not Available]	Negative	#N/A	1	3418	#N/A	3418	0	3418	0	3418
980	TCGA-B6-A0IJ	BRCA	42	FEMALE	BLACK OR AFRICAN AMERICAN	Stage IIB	[Not Applicable]	Infiltrating Ductal Carcinoma	[Not Available]	1995	Indeterminate (neither Pre or Postmenopausal)	-15625	Alive	TUMOR FREE	7106	#N/A	[Not Available]	#N/A	#N/A	#N/A	#N/A	[Not Available]	Negative	#N/A	0	7106	0	7106	0	7106	0	7106
981	TCGA-B6-A0IK	BRCA	63	FEMALE	WHITE	Stage IIIB	[Not Applicable]	Infiltrating Ductal Carcinoma	[Not Available]	1994	Indeterminate (neither Pre or Postmenopausal)	-23150	Dead	WITH TUMOR	#N/A	571	[Not Available]	Distant Metastasis	Brain	#N/A	489	[Not Available]	Negative	#N/A	1	571	1	571	1	489	1	489
982	TCGA-B6-A0IM	BRCA	75	FEMALE	BLACK OR AFRICAN AMERICAN	Stage IIB	[Not Applicable]	Other, specify	[Not Available]	1997	Post (prior bilateral ovariectomy OR >12 mo since LMP with no prior hysterectomy)	-27557	Dead	TUMOR FREE	#N/A	3873	[Not Available]	#N/A	#N/A	#N/A	#N/A	[Not Available]	Negative	#N/A	1	3873	0	3873	0	3873	0	3873
983	TCGA-B6-A0IN	BRCA	45	FEMALE	WHITE	Stage X	[Not Applicable]	Other, specify	[Not Available]	1996	Indeterminate (neither Pre or Postmenopausal)	-16705	Dead	WITH TUMOR	#N/A	2573	[Not Available]	Distant Metastasis	Other, specify	bone, brain	1412	[Not Available]	Negative	#N/A	1	2573	1	2573	1	1412	1	1412
984	TCGA-B6-A0IO	BRCA	66	FEMALE	WHITE	Stage IIA	[Not Applicable]	Infiltrating Ductal Carcinoma	[Not Available]	2001	Indeterminate (neither Pre or Postmenopausal)	-24322	Alive	TUMOR FREE	5042	#N/A	[Not Available]	#N/A	#N/A	#N/A	#N/A	[Not Available]	Negative	#N/A	0	5042	0	5042	0	5042	0	5042
985	TCGA-B6-A0IP	BRCA	74	FEMALE	WHITE	Stage IA	[Not Applicable]	Infiltrating Lobular Carcinoma	[Not Available]	1997	Post (prior bilateral ovariectomy OR >12 mo since LMP with no prior hysterectomy)	-27047	Dead	TUMOR FREE	#N/A	3926	[Not Available]	#N/A	#N/A	#N/A	#N/A	[Not Available]	Negative	#N/A	1	3926	0	3926	0	3926	0	3926
986	TCGA-B6-A0IQ	BRCA	40	FEMALE	WHITE	Stage IIIA	[Not Applicable]	Infiltrating Ductal Carcinoma	[Not Available]	1996	Indeterminate (neither Pre or Postmenopausal)	-14669	Alive	TUMOR FREE	4285	#N/A	[Not Available]	#N/A	#N/A	#N/A	#N/A	[Not Available]	Negative	#N/A	0	4285	0	4285	0	4285	0	4285
987	TCGA-B6-A0RE	BRCA	61	FEMALE	BLACK OR AFRICAN AMERICAN	Stage X	[Not Applicable]	Infiltrating Ductal Carcinoma	[Not Available]	1989	Indeterminate (neither Pre or Postmenopausal)	-22449	Alive	TUMOR FREE	7777	#N/A	[Not Available]	#N/A	#N/A	#N/A	#N/A	[Not Available]	Negative	#N/A	0	7777	0	7777	0	7777	0	7777
988	TCGA-B6-A0RG	BRCA	26	FEMALE	WHITE	Stage IIB	[Not Applicable]	Infiltrating Ductal Carcinoma	[Not Available]	1991	Indeterminate (neither Pre or Postmenopausal)	-9840	Alive	TUMOR FREE	2082	#N/A	[Not Available]	#N/A	#N/A	#N/A	#N/A	[Not Available]	Negative	#N/A	0	2082	0	2082	0	2082	0	2082
989	TCGA-B6-A0RH	BRCA	51	FEMALE	BLACK OR AFRICAN AMERICAN	Stage IIA	[Not Applicable]	Infiltrating Ductal Carcinoma	[Not Available]	1991	Indeterminate (neither Pre or Postmenopausal)	-18759	Dead	TUMOR FREE	#N/A	6456	[Not Available]	Locoregional Disease	Other, specify	Chest Wall	2165	[Not Available]	Negative	#N/A	1	6456	0	6456	1	2165	1	2165
990	TCGA-B6-A0RI	BRCA	44	FEMALE	WHITE	Stage IIIB	[Not Applicable]	Infiltrating Ductal Carcinoma	[Not Available]	1992	Indeterminate (neither Pre or Postmenopausal)	-16138	Alive	WITH TUMOR	7126	#N/A	[Not Available]	Locoregional Disease	Other, specify	Chest Wall	1100	[Not Available]	Negative	#N/A	0	7126	0	7126	1	1100	1	1100
991	TCGA-B6-A0RL	BRCA	60	FEMALE	BLACK OR AFRICAN AMERICAN	Stage IIA	[Not Applicable]	Infiltrating Ductal Carcinoma	[Not Available]	1993	[Not Available]	-22238	Dead	TUMOR FREE	#N/A	2469	[Not Available]	#N/A	#N/A	#N/A	#N/A	[Not Available]	Negative	#N/A	1	2469	0	2469	0	2469	0	2469
992	TCGA-B6-A0RM	BRCA	57	FEMALE	BLACK OR AFRICAN AMERICAN	Stage X	[Not Applicable]	Infiltrating Ductal Carcinoma	[Not Available]	1993	Indeterminate (neither Pre or Postmenopausal)	-21047	Dead	TUMOR FREE	#N/A	2373	[Not Available]	#N/A	#N/A	#N/A	#N/A	[Not Available]	[Not Available]	#N/A	1	2373	0	2373	#N/A	#N/A	0	2373
993	TCGA-B6-A0RN	BRCA	60	FEMALE	WHITE	Stage IA	[Not Applicable]	Infiltrating Ductal Carcinoma	[Not Available]	1993	Post (prior bilateral ovariectomy OR >12 mo since LMP with no prior hysterectomy)	-22077	Alive	TUMOR FREE	8008	#N/A	[Not Available]	#N/A	#N/A	#N/A	#N/A	[Not Available]	Negative	#N/A	0	8008	0	8008	0	8008	0	8008
994	TCGA-B6-A0RO	BRCA	71	FEMALE	WHITE	Stage IIIB	[Not Applicable]	Infiltrating Ductal Carcinoma	[Not Available]	1993	Post (prior bilateral ovariectomy OR >12 mo since LMP with no prior hysterectomy)	-26269	Alive	TUMOR FREE	4929	#N/A	[Not Available]	#N/A	#N/A	#N/A	#N/A	[Not Available]	Negative	#N/A	0	4929	0	4929	0	4929	0	4929
995	TCGA-B6-A0RP	BRCA	73	FEMALE	WHITE	[Discrepancy]	[Not Applicable]	Mixed Histology (please specify)	[Not Available]	1994	Post (prior bilateral ovariectomy OR >12 mo since LMP with no prior hysterectomy)	-26941	Dead	WITH TUMOR	#N/A	3126	[Not Available]	Distant Metastasis	Bone	#N/A	2787	[Not Available]	Negative	#N/A	1	3126	1	3126	1	2787	1	2787
996	TCGA-B6-A0RQ	BRCA	68	FEMALE	WHITE	Stage IIB	[Not Applicable]	Infiltrating Lobular Carcinoma	[Not Available]	1994	Post (prior bilateral ovariectomy OR >12 mo since LMP with no prior hysterectomy)	-25010	Dead	TUMOR FREE	#N/A	4267	[Not Available]	#N/A	#N/A	#N/A	#N/A	[Not Available]	Negative	#N/A	1	4267	0	4267	0	4267	0	4267
997	TCGA-B6-A0RS	BRCA	38	FEMALE	WHITE	Stage IIA	[Not Applicable]	Infiltrating Ductal Carcinoma	[Not Available]	1988	Indeterminate (neither Pre or Postmenopausal)	-14134	Dead	WITH TUMOR	#N/A	3063	[Not Available]	New Primary Tumor	Other, specify	Breast	2041	[Not Available]	Negative	#N/A	1	3063	1	3063	1	2041	1	2041
998	TCGA-B6-A0RT	BRCA	39	FEMALE	WHITE	Stage IIIA	[Not Applicable]	Infiltrating Ductal Carcinoma	[Not Available]	1996	Indeterminate (neither Pre or Postmenopausal)	-14374	Alive	TUMOR FREE	2721	#N/A	[Not Available]	#N/A	#N/A	#N/A	#N/A	[Not Available]	Close	#N/A	0	2721	0	2721	#N/A	#N/A	0	2721
999	TCGA-B6-A0RU	BRCA	40	FEMALE	WHITE	Stage IA	[Not Applicable]	Other, specify	[Not Available]	1990	Indeterminate (neither Pre or Postmenopausal)	-14920	Alive	TUMOR FREE	8605	#N/A	[Not Available]	New Primary Tumor	Other, specify	Right Breast	3076	[Not Available]	Negative	#N/A	0	8605	0	8605	1	3076	1	3076
1000	TCGA-B6-A0RV	BRCA	42	FEMALE	WHITE	Stage IIIA	[Not Applicable]	Mixed Histology (please specify)	[Not Available]	1996	Indeterminate (neither Pre or Postmenopausal)	-15507	Alive	TUMOR FREE	5156	#N/A	[Not Available]	#N/A	#N/A	#N/A	#N/A	[Not Available]	Negative	#N/A	0	5156	0	5156	0	5156	0	5156
1001	TCGA-B6-A0WS	BRCA	58	FEMALE	BLACK OR AFRICAN AMERICAN	Stage X	[Not Applicable]	Infiltrating Ductal Carcinoma	[Not Available]	1996	Indeterminate (neither Pre or Postmenopausal)	-21230	Dead	TUMOR FREE	#N/A	2965	[Not Available]	#N/A	#N/A	#N/A	#N/A	[Not Available]	Positive	#N/A	1	2965	0	2965	#N/A	#N/A	0	2965
1002	TCGA-B6-A0WT	BRCA	61	FEMALE	WHITE	Stage IIB	[Not Applicable]	Infiltrating Ductal Carcinoma	[Not Available]	1995	Post (prior bilateral ovariectomy OR >12 mo since LMP with no prior hysterectomy)	-22362	Alive	TUMOR FREE	5739	#N/A	[Not Available]	New Primary Tumor	Other, specify	right breast cancer contralateral	3862	[Not Available]	Negative	#N/A	0	5739	0	5739	1	3862	1	3862
1003	TCGA-B6-A0WV	BRCA	67	FEMALE	WHITE	Stage IIB	[Not Applicable]	Infiltrating Ductal Carcinoma	[Not Available]	1995	Post (prior bilateral ovariectomy OR >12 mo since LMP with no prior hysterectomy)	-24803	Dead	TUMOR FREE	#N/A	2417	[Not Available]	#N/A	#N/A	#N/A	#N/A	[Not Available]	Negative	#N/A	1	2417	0	2417	0	2417	0	2417
1004	TCGA-B6-A0WW	BRCA	58	FEMALE	BLACK OR AFRICAN AMERICAN	Stage X	[Not Applicable]	Infiltrating Ductal Carcinoma	[Not Available]	1997	Indeterminate (neither Pre or Postmenopausal)	-21479	Dead	WITH TUMOR	#N/A	558	[Not Available]	Distant Metastasis	Liver	#N/A	447	[Not Available]	Negative	#N/A	1	558	1	558	1	447	1	447
1005	TCGA-B6-A0WX	BRCA	40	FEMALE	BLACK OR AFRICAN AMERICAN	Stage IIIA	[Not Applicable]	Other, specify	[Not Available]	1998	Pre (<6 months since LMP AND no prior bilateral ovariectomy AND not on estrogen replacement)	-14784	Dead	WITH TUMOR	#N/A	639	[Not Available]	Distant Metastasis	Bone	#N/A	563	[Not Available]	Negative	#N/A	1	639	1	639	1	563	1	563
1006	TCGA-B6-A0WY	BRCA	40	FEMALE	WHITE	Stage IIIA	[Not Applicable]	Infiltrating Ductal Carcinoma	[Not Available]	1996	Pre (<6 months since LMP AND no prior bilateral ovariectomy AND not on estrogen replacement)	-14778	Dead	WITH TUMOR	#N/A	3461	[Not Available]	Distant Metastasis	Bone	#N/A	2011	[Not Available]	Negative	#N/A	1	3461	1	3461	1	2011	1	2011
1007	TCGA-B6-A0WZ	BRCA	50	FEMALE	BLACK OR AFRICAN AMERICAN	Stage II	[Not Applicable]	Infiltrating Ductal Carcinoma	[Not Available]	1996	Indeterminate (neither Pre or Postmenopausal)	-18584	Alive	TUMOR FREE	6292	#N/A	[Not Available]	New Primary Tumor	Bone	#N/A	5117	[Not Available]	Negative	#N/A	0	6292	0	6292	0	6292	1	5117
1008	TCGA-B6-A0X0	BRCA	54	FEMALE	WHITE	Stage I	[Not Applicable]	Other, specify	[Not Available]	1996	Indeterminate (neither Pre or Postmenopausal)	-19802	Dead	#N/A	#N/A	3945	[Not Available]	#N/A	#N/A	#N/A	#N/A	[Not Available]	Negative	#N/A	1	3945	#N/A	3945	0	3945	0	3945
1009	TCGA-B6-A0X1	BRCA	48	FEMALE	WHITE	[Discrepancy]	[Not Applicable]	Infiltrating Ductal Carcinoma	[Not Available]	1994	Indeterminate (neither Pre or Postmenopausal)	-17624	Dead	TUMOR FREE	#N/A	7455	[Not Available]	Distant Metastasis	Brain	#N/A	490	[Not Available]	Negative	#N/A	1	7455	0	7455	1	490	1	490
1010	TCGA-B6-A0X4	BRCA	62	FEMALE	WHITE	Stage IIB	[Not Applicable]	Infiltrating Ductal Carcinoma	[Not Available]	1996	Post (prior bilateral ovariectomy OR >12 mo since LMP with no prior hysterectomy)	-22688	Dead	WITH TUMOR	#N/A	860	[Not Available]	Distant Metastasis	Bone	#N/A	716	[Not Available]	Negative	#N/A	1	860	1	860	1	716	1	716
1011	TCGA-B6-A0X5	BRCA	61	FEMALE	BLACK OR AFRICAN AMERICAN	Stage IIB	[Not Applicable]	Infiltrating Ductal Carcinoma	[Not Available]	1995	Post (prior bilateral ovariectomy OR >12 mo since LMP with no prior hysterectomy)	-22380	Dead	WITH TUMOR	#N/A	2097	[Not Available]	Distant Metastasis	Other, specify	Liver and Pleura and Bone	1343	[Not Available]	Negative	#N/A	1	2097	1	2097	1	1343	1	1343
1012	TCGA-B6-A0X7	BRCA	62	FEMALE	WHITE	Stage X	[Not Applicable]	Mixed Histology (please specify)	[Not Available]	1994	Post (prior bilateral ovariectomy OR >12 mo since LMP with no prior hysterectomy)	-22723	Dead	TUMOR FREE	#N/A	1781	[Not Available]	New Primary Tumor	Other, specify	colon	1104	[Not Available]	[Not Available]	#N/A	1	1781	0	1781	#N/A	#N/A	1	1104
1013	TCGA-B6-A1KC	BRCA	67	FEMALE	WHITE	Stage IIB	[Not Applicable]	Infiltrating Ductal Carcinoma	[Not Available]	2003	Post (prior bilateral ovariectomy OR >12 mo since LMP with no prior hysterectomy)	-24791	Alive	TUMOR FREE	1326	#N/A	[Not Available]	#N/A	#N/A	#N/A	#N/A	[Not Available]	Negative	#N/A	0	1326	0	1326	0	1326	0	1326
1014	TCGA-B6-A1KF	BRCA	68	FEMALE	WHITE	Stage IIB	[Not Applicable]	Infiltrating Ductal Carcinoma	[Not Available]	1998	Post (prior bilateral ovariectomy OR >12 mo since LMP with no prior hysterectomy)	-24891	Alive	TUMOR FREE	3088	#N/A	[Not Available]	#N/A	#N/A	#N/A	#N/A	[Not Available]	Negative	#N/A	0	3088	0	3088	0	3088	0	3088
1015	TCGA-B6-A1KI	BRCA	63	FEMALE	WHITE	Stage I	[Not Applicable]	Infiltrating Ductal Carcinoma	[Not Available]	2003	Post (prior bilateral ovariectomy OR >12 mo since LMP with no prior hysterectomy)	-23031	Alive	TUMOR FREE	2236	#N/A	[Not Available]	#N/A	#N/A	#N/A	#N/A	[Not Available]	Negative	#N/A	0	2236	0	2236	0	2236	0	2236
1016	TCGA-B6-A1KN	BRCA	57	FEMALE	WHITE	Stage IIIB	[Not Applicable]	Infiltrating Ductal Carcinoma	[Not Available]	1998	Post (prior bilateral ovariectomy OR >12 mo since LMP with no prior hysterectomy)	-21183	Alive	TUMOR FREE	4233	#N/A	[Not Available]	#N/A	#N/A	#N/A	#N/A	[Not Available]	Negative	#N/A	0	4233	0	4233	0	4233	0	4233
1017	TCGA-B6-A2IU	BRCA	62	FEMALE	WHITE	Stage IIA	[Not Applicable]	Infiltrating Lobular Carcinoma	[Not Available]	1998	Indeterminate (neither Pre or Postmenopausal)	-22905	Alive	WITH TUMOR	5176	#N/A	[Not Available]	New Primary Tumor	Other, specify	Lung	4224	[Not Available]	Negative	#N/A	0	5176	0	5176	0	5176	1	4224
1018	TCGA-B6-A3ZX	BRCA	50	FEMALE	BLACK OR AFRICAN AMERICAN	Stage IV	[Not Applicable]	Mixed Histology (please specify)	[Not Available]	2007	[Unknown]	-18434	Dead	WITH TUMOR	#N/A	1152	[Not Available]	Distant Metastasis	Bone	#N/A	994	[Not Available]	Negative	#N/A	1	1152	1	1152	#N/A	#N/A	1	994
1019	TCGA-B6-A400	BRCA	43	FEMALE	BLACK OR AFRICAN AMERICAN	Stage IIIA	[Not Applicable]	Infiltrating Ductal Carcinoma	[Not Available]	2008	[Unknown]	-16022	Alive	TUMOR FREE	215	#N/A	[Not Available]	#N/A	#N/A	#N/A	#N/A	[Not Available]	Negative	#N/A	0	215	0	215	0	215	0	215
1020	TCGA-B6-A401	BRCA	47	FEMALE	BLACK OR AFRICAN AMERICAN	Stage IIA	[Not Applicable]	Infiltrating Ductal Carcinoma	[Not Available]	2007	[Unknown]	-17438	Alive	TUMOR FREE	2596	#N/A	[Not Available]	#N/A	#N/A	#N/A	#N/A	[Not Available]	Negative	#N/A	0	2596	0	2596	0	2596	0	2596
1021	TCGA-B6-A402	BRCA	47	FEMALE	BLACK OR AFRICAN AMERICAN	Stage I	[Not Applicable]	Infiltrating Ductal Carcinoma	[Not Available]	2008	[Unknown]	-17314	Alive	WITH TUMOR	2281	#N/A	[Not Available]	Locoregional Recurrence	Other, specify	breast	1516	[Not Available]	Negative	#N/A	0	2281	0	2281	1	1516	1	1516
1022	TCGA-B6-A408	BRCA	55	FEMALE	BLACK OR AFRICAN AMERICAN	Stage IIIC	[Not Applicable]	Mixed Histology (please specify)	[Not Available]	2008	[Unknown]	-20102	Alive	TUMOR FREE	2072	#N/A	[Not Available]	#N/A	#N/A	#N/A	#N/A	[Not Available]	Negative	#N/A	0	2072	0	2072	0	2072	0	2072
1023	TCGA-B6-A409	BRCA	44	FEMALE	BLACK OR AFRICAN AMERICAN	Stage IIIA	[Not Applicable]	Infiltrating Ductal Carcinoma	[Not Available]	2008	Pre (<6 months since LMP AND no prior bilateral ovariectomy AND not on estrogen replacement)	-16178	Dead	WITH TUMOR	#N/A	573	[Not Available]	Distant Metastasis	Lung	#N/A	456	[Not Available]	Negative	#N/A	1	573	1	573	1	456	1	456
1024	TCGA-B6-A40B	BRCA	76	FEMALE	WHITE	Stage I	[Not Applicable]	Infiltrating Lobular Carcinoma	[Not Available]	2005	Post (prior bilateral ovariectomy OR >12 mo since LMP with no prior hysterectomy)	-27811	Alive	TUMOR FREE	3152	#N/A	[Not Available]	#N/A	#N/A	#N/A	#N/A	[Not Available]	Negative	#N/A	0	3152	0	3152	0	3152	0	3152
1025	TCGA-B6-A40C	BRCA	51	FEMALE	WHITE	Stage IIB	[Not Applicable]	Infiltrating Lobular Carcinoma	[Not Available]	2005	[Unknown]	-18852	Alive	TUMOR FREE	2164	#N/A	[Not Available]	#N/A	#N/A	#N/A	#N/A	[Not Available]	Negative	#N/A	0	2164	0	2164	0	2164	0	2164
1026	TCGA-BH-A0AU	BRCA	45	FEMALE	WHITE	Stage IIA	[Not Applicable]	Infiltrating Ductal Carcinoma	[Not Available]	2008	Pre (<6 months since LMP AND no prior bilateral ovariectomy AND not on estrogen replacement)	-16688	Alive	TUMOR FREE	1914	#N/A	[Not Available]	#N/A	#N/A	#N/A	#N/A	[Not Available]	Negative	#N/A	0	1914	0	1914	0	1914	0	1914
1027	TCGA-BH-A0AV	BRCA	52	FEMALE	BLACK OR AFRICAN AMERICAN	Stage I	[Not Applicable]	Infiltrating Ductal Carcinoma	[Not Available]	2008	[Not Available]	-19314	Alive	TUMOR FREE	1820	#N/A	[Not Available]	#N/A	#N/A	#N/A	#N/A	[Not Available]	Negative	#N/A	0	1820	0	1820	0	1820	0	1820
1028	TCGA-BH-A0AW	BRCA	56	FEMALE	WHITE	Stage IIA	[Not Applicable]	Infiltrating Ductal Carcinoma	[Not Available]	2008	Post (prior bilateral ovariectomy OR >12 mo since LMP with no prior hysterectomy)	-20468	Alive	TUMOR FREE	622	#N/A	[Not Available]	#N/A	#N/A	#N/A	#N/A	[Not Available]	Negative	#N/A	0	622	0	622	0	622	0	622
1029	TCGA-BH-A0AY	BRCA	62	FEMALE	WHITE	Stage IIA	[Not Applicable]	Infiltrating Ductal Carcinoma	[Not Available]	2008	Post (prior bilateral ovariectomy OR >12 mo since LMP with no prior hysterectomy)	-22703	Alive	TUMOR FREE	777	#N/A	[Not Available]	#N/A	#N/A	#N/A	#N/A	[Not Available]	Negative	#N/A	0	777	0	777	0	777	0	777
1030	TCGA-BH-A0AZ	BRCA	47	FEMALE	WHITE	Stage IIIA	[Not Applicable]	Infiltrating Ductal Carcinoma	[Not Available]	2008	Pre (<6 months since LMP AND no prior bilateral ovariectomy AND not on estrogen replacement)	-17465	Alive	TUMOR FREE	1919	#N/A	[Not Available]	#N/A	#N/A	#N/A	#N/A	[Not Available]	Negative	#N/A	0	1919	0	1919	0	1919	0	1919
1031	TCGA-BH-A0B0	BRCA	56	FEMALE	BLACK OR AFRICAN AMERICAN	Stage I	[Not Applicable]	Infiltrating Ductal Carcinoma	[Not Available]	2006	Peri (6-12 months since last menstrual period)	-20776	Alive	TUMOR FREE	2477	#N/A	[Not Available]	#N/A	#N/A	#N/A	#N/A	[Not Available]	Negative	#N/A	0	2477	0	2477	0	2477	0	2477
1032	TCGA-BH-A0B1	BRCA	66	FEMALE	WHITE	Stage IIB	[Not Applicable]	Infiltrating Ductal Carcinoma	[Not Available]	2007	Post (prior bilateral ovariectomy OR >12 mo since LMP with no prior hysterectomy)	-24315	Alive	TUMOR FREE	1148	#N/A	[Not Available]	#N/A	#N/A	#N/A	#N/A	[Not Available]	Negative	#N/A	0	1148	0	1148	0	1148	0	1148
1033	TCGA-BH-A0B3	BRCA	53	FEMALE	WHITE	Stage IIB	[Not Applicable]	Infiltrating Ductal Carcinoma	[Not Available]	2007	Post (prior bilateral ovariectomy OR >12 mo since LMP with no prior hysterectomy)	-19479	Alive	TUMOR FREE	1203	#N/A	[Not Available]	#N/A	#N/A	#N/A	#N/A	[Not Available]	Negative	#N/A	0	1203	0	1203	0	1203	0	1203
1034	TCGA-BH-A0B4	BRCA	65	MALE	WHITE	Stage IIIA	[Not Applicable]	Infiltrating Ductal Carcinoma	[Not Available]	2007	[Not Available]	-23980	Alive	TUMOR FREE	1191	#N/A	[Not Available]	#N/A	#N/A	#N/A	#N/A	[Not Available]	Negative	#N/A	0	1191	0	1191	0	1191	0	1191
1035	TCGA-BH-A0B5	BRCA	40	FEMALE	WHITE	Stage IIIA	[Not Applicable]	Infiltrating Lobular Carcinoma	[Not Available]	2007	Pre (<6 months since LMP AND no prior bilateral ovariectomy AND not on estrogen replacement)	-14920	Alive	TUMOR FREE	2136	#N/A	[Not Available]	#N/A	#N/A	#N/A	#N/A	[Not Available]	Positive	#N/A	0	2136	0	2136	#N/A	#N/A	0	2136
1036	TCGA-BH-A0B6	BRCA	47	FEMALE	WHITE	Stage I	[Not Applicable]	Infiltrating Ductal Carcinoma	[Not Available]	2006	[Not Available]	-17346	Alive	TUMOR FREE	2483	#N/A	[Not Available]	#N/A	#N/A	#N/A	#N/A	[Not Available]	Negative	#N/A	0	2483	0	2483	0	2483	0	2483
1037	TCGA-BH-A0B7	BRCA	42	FEMALE	WHITE	Stage IIB	[Not Applicable]	Infiltrating Ductal Carcinoma	[Not Available]	2006	Pre (<6 months since LMP AND no prior bilateral ovariectomy AND not on estrogen replacement)	-15593	Alive	TUMOR FREE	2559	#N/A	[Not Available]	#N/A	#N/A	#N/A	#N/A	[Not Available]	Negative	#N/A	0	2559	0	2559	0	2559	0	2559
1038	TCGA-BH-A0B8	BRCA	64	FEMALE	WHITE	Stage I	[Not Applicable]	Infiltrating Ductal Carcinoma	[Not Available]	2006	Post (prior bilateral ovariectomy OR >12 mo since LMP with no prior hysterectomy)	-23380	Alive	TUMOR FREE	1569	#N/A	[Not Available]	#N/A	#N/A	#N/A	#N/A	[Not Available]	Negative	#N/A	0	1569	0	1569	0	1569	0	1569
1039	TCGA-BH-A0B9	BRCA	44	FEMALE	WHITE	Stage IA	[Not Applicable]	Infiltrating Ductal Carcinoma	[Not Available]	2006	Pre (<6 months since LMP AND no prior bilateral ovariectomy AND not on estrogen replacement)	-16310	Alive	TUMOR FREE	1572	#N/A	[Not Available]	#N/A	#N/A	#N/A	#N/A	[Not Available]	Negative	#N/A	0	1572	0	1572	0	1572	0	1572
1040	TCGA-BH-A0BA	BRCA	51	FEMALE	WHITE	Stage IIIC	[Not Applicable]	Mixed Histology (please specify)	[Not Available]	2006	Pre (<6 months since LMP AND no prior bilateral ovariectomy AND not on estrogen replacement)	-18839	Alive	TUMOR FREE	1132	#N/A	[Not Available]	#N/A	#N/A	#N/A	#N/A	[Not Available]	Negative	#N/A	0	1132	0	1132	0	1132	0	1132
1041	TCGA-BH-A0BC	BRCA	60	FEMALE	WHITE	Stage IIIC	[Not Applicable]	Infiltrating Ductal Carcinoma	[Not Available]	2007	Post (prior bilateral ovariectomy OR >12 mo since LMP with no prior hysterectomy)	-21949	Alive	TUMOR FREE	974	#N/A	[Not Available]	#N/A	#N/A	#N/A	#N/A	[Not Available]	Negative	#N/A	0	974	0	974	0	974	0	974
1042	TCGA-BH-A0BD	BRCA	47	FEMALE	WHITE	Stage IIA	[Not Applicable]	Infiltrating Ductal Carcinoma	[Not Available]	2009	Pre (<6 months since LMP AND no prior bilateral ovariectomy AND not on estrogen replacement)	-17275	Alive	TUMOR FREE	554	#N/A	[Not Available]	#N/A	#N/A	#N/A	#N/A	[Not Available]	Negative	#N/A	0	554	0	554	0	554	0	554
1043	TCGA-BH-A0BF	BRCA	56	FEMALE	WHITE	Stage IIB	[Not Applicable]	Infiltrating Ductal Carcinoma	[Not Available]	2009	Post (prior bilateral ovariectomy OR >12 mo since LMP with no prior hysterectomy)	-20691	Dead	TUMOR FREE	#N/A	1324	[Not Available]	#N/A	#N/A	#N/A	#N/A	[Not Available]	Negative	#N/A	1	1324	0	1324	0	1324	0	1324
1044	TCGA-BH-A0BG	BRCA	73	FEMALE	WHITE	Stage I	[Not Applicable]	Infiltrating Ductal Carcinoma	[Not Available]	2008	Post (prior bilateral ovariectomy OR >12 mo since LMP with no prior hysterectomy)	-26988	Alive	TUMOR FREE	1871	#N/A	[Not Available]	#N/A	#N/A	#N/A	#N/A	[Not Available]	Negative	#N/A	0	1871	0	1871	0	1871	0	1871
1045	TCGA-BH-A0BJ	BRCA	41	FEMALE	WHITE	Stage IIB	[Not Applicable]	Infiltrating Ductal Carcinoma	[Not Available]	2008	Pre (<6 months since LMP AND no prior bilateral ovariectomy AND not on estrogen replacement)	-15027	Alive	TUMOR FREE	660	#N/A	[Not Available]	#N/A	#N/A	#N/A	#N/A	[Not Available]	Negative	#N/A	0	660	0	660	0	660	0	660
1046	TCGA-BH-A0BL	BRCA	35	FEMALE	WHITE	Stage I	[Not Applicable]	Infiltrating Ductal Carcinoma	[Not Available]	2007	Pre (<6 months since LMP AND no prior bilateral ovariectomy AND not on estrogen replacement)	-12841	Alive	TUMOR FREE	2278	#N/A	[Not Available]	#N/A	#N/A	#N/A	#N/A	[Not Available]	Negative	#N/A	0	2278	0	2278	0	2278	0	2278
1047	TCGA-BH-A0BM	BRCA	54	FEMALE	WHITE	Stage IIB	[Not Applicable]	Infiltrating Ductal Carcinoma	[Not Available]	2007	Post (prior bilateral ovariectomy OR >12 mo since LMP with no prior hysterectomy)	-20049	Alive	TUMOR FREE	1876	#N/A	[Not Available]	#N/A	#N/A	#N/A	#N/A	[Not Available]	Negative	#N/A	0	1876	0	1876	0	1876	0	1876
1048	TCGA-BH-A0BO	BRCA	54	FEMALE	WHITE	Stage I	[Not Applicable]	Infiltrating Ductal Carcinoma	[Not Available]	2007	Pre (<6 months since LMP AND no prior bilateral ovariectomy AND not on estrogen replacement)	-19767	Alive	TUMOR FREE	2197	#N/A	[Not Available]	#N/A	#N/A	#N/A	#N/A	[Not Available]	Negative	#N/A	0	2197	0	2197	0	2197	0	2197
1049	TCGA-BH-A0BP	BRCA	76	FEMALE	WHITE	Stage I	[Not Applicable]	Infiltrating Ductal Carcinoma	[Not Available]	2006	Post (prior bilateral ovariectomy OR >12 mo since LMP with no prior hysterectomy)	-27917	Dead	TUMOR FREE	#N/A	2296	[Not Available]	#N/A	#N/A	#N/A	#N/A	[Not Available]	Negative	#N/A	1	2296	0	2296	0	2296	0	2296
1050	TCGA-BH-A0BQ	BRCA	39	FEMALE	WHITE	Stage I	[Not Applicable]	Infiltrating Ductal Carcinoma	[Not Available]	2007	Pre (<6 months since LMP AND no prior bilateral ovariectomy AND not on estrogen replacement)	-14494	Alive	TUMOR FREE	2255	#N/A	[Not Available]	Locoregional Recurrence	Other, specify	Dermis and epidermis	1709	[Not Available]	Negative	#N/A	0	2255	0	2255	1	1709	1	1709
1051	TCGA-BH-A0BR	BRCA	59	FEMALE	WHITE	Stage I	[Not Applicable]	Infiltrating Ductal Carcinoma	[Not Available]	2007	Post (prior bilateral ovariectomy OR >12 mo since LMP with no prior hysterectomy)	-21622	Alive	TUMOR FREE	2330	#N/A	[Not Available]	#N/A	#N/A	#N/A	#N/A	[Not Available]	Negative	#N/A	0	2330	0	2330	0	2330	0	2330
1052	TCGA-BH-A0BS	BRCA	55	FEMALE	WHITE	Stage IIIA	[Not Applicable]	Infiltrating Ductal Carcinoma	[Not Available]	2007	Post (prior bilateral ovariectomy OR >12 mo since LMP with no prior hysterectomy)	-20374	Alive	TUMOR FREE	2612	#N/A	[Not Available]	#N/A	#N/A	#N/A	#N/A	[Not Available]	Negative	#N/A	0	2612	0	2612	0	2612	0	2612
1053	TCGA-BH-A0BT	BRCA	56	FEMALE	WHITE	Stage IIA	[Not Applicable]	Infiltrating Ductal Carcinoma	[Not Available]	2007	[Not Available]	-20625	Alive	TUMOR FREE	2365	#N/A	[Not Available]	#N/A	#N/A	#N/A	#N/A	[Not Available]	Negative	#N/A	0	2365	0	2365	0	2365	0	2365
1054	TCGA-BH-A0BV	BRCA	78	FEMALE	WHITE	Stage IIB	[Not Applicable]	Infiltrating Ductal Carcinoma	[Not Available]	2006	Post (prior bilateral ovariectomy OR >12 mo since LMP with no prior hysterectomy)	-28699	Alive	TUMOR FREE	1519	#N/A	[Not Available]	#N/A	#N/A	#N/A	#N/A	[Not Available]	Negative	#N/A	0	1519	0	1519	0	1519	0	1519
1055	TCGA-BH-A0BW	BRCA	71	FEMALE	BLACK OR AFRICAN AMERICAN	Stage I	[Not Applicable]	Infiltrating Ductal Carcinoma	[Not Available]	2006	Post (prior bilateral ovariectomy OR >12 mo since LMP with no prior hysterectomy)	-25974	Alive	TUMOR FREE	2371	#N/A	[Not Available]	#N/A	#N/A	#N/A	#N/A	[Not Available]	Negative	#N/A	0	2371	0	2371	0	2371	0	2371
1056	TCGA-BH-A0BZ	BRCA	59	FEMALE	WHITE	Stage IIIA	[Not Applicable]	Infiltrating Ductal Carcinoma	[Not Available]	2007	Post (prior bilateral ovariectomy OR >12 mo since LMP with no prior hysterectomy)	-21856	Alive	TUMOR FREE	2255	#N/A	[Not Available]	#N/A	#N/A	#N/A	#N/A	[Not Available]	Negative	#N/A	0	2255	0	2255	0	2255	0	2255
1057	TCGA-BH-A0C0	BRCA	62	FEMALE	WHITE	Stage IIA	[Not Applicable]	Infiltrating Ductal Carcinoma	[Not Available]	2007	Post (prior bilateral ovariectomy OR >12 mo since LMP with no prior hysterectomy)	-23006	Alive	TUMOR FREE	1270	#N/A	[Not Available]	#N/A	#N/A	#N/A	#N/A	[Not Available]	Negative	#N/A	0	1270	0	1270	0	1270	0	1270
1058	TCGA-BH-A0C1	BRCA	61	FEMALE	WHITE	Stage IIIA	[Not Applicable]	Infiltrating Lobular Carcinoma	[Not Available]	2007	Post (prior bilateral ovariectomy OR >12 mo since LMP with no prior hysterectomy)	-22377	Dead	WITH TUMOR	#N/A	1411	[Not Available]	Distant Metastasis	Bone	#N/A	1123	[Not Available]	Negative	#N/A	1	1411	1	1411	1	1123	1	1123
1059	TCGA-BH-A0C3	BRCA	47	FEMALE	WHITE	Stage I	[Not Applicable]	Mixed Histology (please specify)	[Not Available]	2006	Pre (<6 months since LMP AND no prior bilateral ovariectomy AND not on estrogen replacement)	-17221	Alive	WITH TUMOR	2709	#N/A	[Not Available]	Distant Metastasis	Bone	#N/A	2674	[Not Available]	Negative	#N/A	0	2709	0	2709	1	2674	1	2674
1060	TCGA-BH-A0C7	BRCA	48	FEMALE	WHITE	Stage IIB	[Not Applicable]	Infiltrating Ductal Carcinoma	[Not Available]	2006	Peri (6-12 months since last menstrual period)	-17871	Alive	TUMOR FREE	2767	#N/A	[Not Available]	#N/A	#N/A	#N/A	#N/A	[Not Available]	Negative	#N/A	0	2767	0	2767	0	2767	0	2767
1061	TCGA-BH-A0DD	BRCA	58	MALE	WHITE	Stage IIB	[Not Applicable]	Infiltrating Ductal Carcinoma	[Not Available]	2006	[Not Available]	-21386	Alive	TUMOR FREE	2486	#N/A	[Not Available]	#N/A	#N/A	#N/A	#N/A	[Not Available]	Negative	#N/A	0	2486	0	2486	0	2486	0	2486
1062	TCGA-BH-A0DE	BRCA	62	FEMALE	WHITE	Stage IIA	[Not Applicable]	Infiltrating Ductal Carcinoma	[Not Available]	2007	Post (prior bilateral ovariectomy OR >12 mo since LMP with no prior hysterectomy)	-22656	Alive	TUMOR FREE	2372	#N/A	[Not Available]	#N/A	#N/A	#N/A	#N/A	[Not Available]	Negative	#N/A	0	2372	0	2372	0	2372	0	2372
1063	TCGA-BH-A0DG	BRCA	30	FEMALE	BLACK OR AFRICAN AMERICAN	Stage IIA	[Not Applicable]	Infiltrating Ductal Carcinoma	[Not Available]	2007	Pre (<6 months since LMP AND no prior bilateral ovariectomy AND not on estrogen replacement)	-11204	Alive	TUMOR FREE	2041	#N/A	[Not Available]	#N/A	#N/A	#N/A	#N/A	[Not Available]	Negative	#N/A	0	2041	0	2041	0	2041	0	2041
1064	TCGA-BH-A0DH	BRCA	63	FEMALE	WHITE	Stage IIB	[Not Applicable]	Infiltrating Ductal Carcinoma	[Not Available]	2007	Post (prior bilateral ovariectomy OR >12 mo since LMP with no prior hysterectomy)	-23366	Alive	TUMOR FREE	1156	#N/A	[Not Available]	#N/A	#N/A	#N/A	#N/A	[Not Available]	Negative	#N/A	0	1156	0	1156	0	1156	0	1156
1065	TCGA-BH-A0DI	BRCA	63	FEMALE	WHITE	Stage IIB	[Not Applicable]	Infiltrating Ductal Carcinoma	[Not Available]	2009	Post (prior bilateral ovariectomy OR >12 mo since LMP with no prior hysterectomy)	-23327	Alive	TUMOR FREE	912	#N/A	[Not Available]	#N/A	#N/A	#N/A	#N/A	[Not Available]	Negative	#N/A	0	912	0	912	0	912	0	912
1066	TCGA-BH-A0DK	BRCA	49	FEMALE	WHITE	Stage IIA	[Not Applicable]	Infiltrating Ductal Carcinoma	[Not Available]	2009	Pre (<6 months since LMP AND no prior bilateral ovariectomy AND not on estrogen replacement)	-18237	Alive	TUMOR FREE	423	#N/A	[Not Available]	#N/A	#N/A	#N/A	#N/A	[Not Available]	Negative	#N/A	0	423	0	423	0	423	0	423
1067	TCGA-BH-A0DL	BRCA	64	FEMALE	WHITE	Stage IIA	[Not Applicable]	Other, specify	[Not Available]	2007	Post (prior bilateral ovariectomy OR >12 mo since LMP with no prior hysterectomy)	-23628	Alive	TUMOR FREE	2381	#N/A	[Not Available]	#N/A	#N/A	#N/A	#N/A	[Not Available]	Negative	#N/A	0	2381	0	2381	0	2381	0	2381
1068	TCGA-BH-A0DO	BRCA	78	FEMALE	WHITE	Stage I	[Not Applicable]	Infiltrating Ductal Carcinoma	[Not Available]	2009	Post (prior bilateral ovariectomy OR >12 mo since LMP with no prior hysterectomy)	-28529	Alive	TUMOR FREE	1644	#N/A	[Not Available]	#N/A	#N/A	#N/A	#N/A	[Not Available]	Negative	#N/A	0	1644	0	1644	0	1644	0	1644
1069	TCGA-BH-A0DP	BRCA	60	FEMALE	WHITE	Stage IIB	[Not Applicable]	Infiltrating Lobular Carcinoma	[Not Available]	2009	Post (prior bilateral ovariectomy OR >12 mo since LMP with no prior hysterectomy)	-22199	Alive	TUMOR FREE	476	#N/A	[Not Available]	#N/A	#N/A	#N/A	#N/A	[Not Available]	Negative	#N/A	0	476	0	476	0	476	0	476
1070	TCGA-BH-A0DQ	BRCA	42	FEMALE	WHITE	Stage IIB	[Not Applicable]	Infiltrating Ductal Carcinoma	[Not Available]	2009	Pre (<6 months since LMP AND no prior bilateral ovariectomy AND not on estrogen replacement)	-15533	Alive	TUMOR FREE	98	#N/A	[Not Available]	#N/A	#N/A	#N/A	#N/A	[Not Available]	Negative	#N/A	0	98	0	98	0	98	0	98
1071	TCGA-BH-A0DS	BRCA	71	FEMALE	WHITE	Stage IIIA	[Not Applicable]	Infiltrating Ductal Carcinoma	[Not Available]	2010	Post (prior bilateral ovariectomy OR >12 mo since LMP with no prior hysterectomy)	-25944	Alive	TUMOR FREE	78	#N/A	[Not Available]	#N/A	#N/A	#N/A	#N/A	[Not Available]	Negative	#N/A	0	78	0	78	0	78	0	78
1072	TCGA-BH-A0DT	BRCA	41	FEMALE	WHITE	Stage IIA	[Not Applicable]	Infiltrating Ductal Carcinoma	[Not Available]	2007	Pre (<6 months since LMP AND no prior bilateral ovariectomy AND not on estrogen replacement)	-15078	Alive	TUMOR FREE	2403	#N/A	[Not Available]	#N/A	#N/A	#N/A	#N/A	[Not Available]	Negative	#N/A	0	2403	0	2403	0	2403	0	2403
1073	TCGA-BH-A0DV	BRCA	54	FEMALE	WHITE	Stage IIIA	[Not Applicable]	Infiltrating Ductal Carcinoma	[Not Available]	2007	Peri (6-12 months since last menstrual period)	-19781	Alive	TUMOR FREE	2064	#N/A	[Not Available]	#N/A	#N/A	#N/A	#N/A	[Not Available]	Negative	#N/A	0	2064	0	2064	0	2064	0	2064
1074	TCGA-BH-A0DX	BRCA	62	FEMALE	WHITE	Stage I	[Not Applicable]	Infiltrating Ductal Carcinoma	[Not Available]	2007	Post (prior bilateral ovariectomy OR >12 mo since LMP with no prior hysterectomy)	-22833	Alive	TUMOR FREE	2156	#N/A	[Not Available]	#N/A	#N/A	#N/A	#N/A	[Not Available]	Negative	#N/A	0	2156	0	2156	0	2156	0	2156
1075	TCGA-BH-A0DZ	BRCA	43	FEMALE	WHITE	Stage IIB	[Not Applicable]	Infiltrating Ductal Carcinoma	[Not Available]	2009	Pre (<6 months since LMP AND no prior bilateral ovariectomy AND not on estrogen replacement)	-15980	Alive	TUMOR FREE	495	#N/A	[Not Available]	#N/A	#N/A	#N/A	#N/A	[Not Available]	Negative	#N/A	0	495	0	495	0	495	0	495
1076	TCGA-BH-A0E0	BRCA	38	FEMALE	WHITE	Stage IIIC	[Not Applicable]	Infiltrating Ductal Carcinoma	[Not Available]	2009	Pre (<6 months since LMP AND no prior bilateral ovariectomy AND not on estrogen replacement)	-14175	Alive	TUMOR FREE	134	#N/A	[Not Available]	#N/A	#N/A	#N/A	#N/A	[Not Available]	Negative	#N/A	0	134	0	134	0	134	0	134
1077	TCGA-BH-A0E1	BRCA	52	FEMALE	WHITE	Stage IIB	[Not Applicable]	Infiltrating Ductal Carcinoma	[Not Available]	2009	Peri (6-12 months since last menstrual period)	-19192	Alive	TUMOR FREE	477	#N/A	[Not Available]	#N/A	#N/A	#N/A	#N/A	[Not Available]	Negative	#N/A	0	477	0	477	0	477	0	477
1078	TCGA-BH-A0E2	BRCA	49	FEMALE	BLACK OR AFRICAN AMERICAN	Stage IIIA	[Not Applicable]	Infiltrating Ductal Carcinoma	[Not Available]	2009	Pre (<6 months since LMP AND no prior bilateral ovariectomy AND not on estrogen replacement)	-18152	Alive	TUMOR FREE	435	#N/A	[Not Available]	#N/A	#N/A	#N/A	#N/A	[Not Available]	Negative	#N/A	0	435	0	435	0	435	0	435
1079	TCGA-BH-A0E6	BRCA	69	FEMALE	WHITE	Stage IA	[Not Applicable]	Infiltrating Ductal Carcinoma	[Not Available]	2009	Post (prior bilateral ovariectomy OR >12 mo since LMP with no prior hysterectomy)	-25408	Alive	TUMOR FREE	293	#N/A	[Not Available]	#N/A	#N/A	#N/A	#N/A	[Not Available]	Negative	#N/A	0	293	0	293	0	293	0	293
1080	TCGA-BH-A0E7	BRCA	79	FEMALE	WHITE	Stage IIB	[Not Applicable]	Infiltrating Ductal Carcinoma	[Not Available]	2006	Post (prior bilateral ovariectomy OR >12 mo since LMP with no prior hysterectomy)	-29115	Alive	TUMOR FREE	1363	#N/A	[Not Available]	#N/A	#N/A	#N/A	#N/A	[Not Available]	Negative	#N/A	0	1363	0	1363	0	1363	0	1363
1081	TCGA-BH-A0E9	BRCA	53	FEMALE	WHITE	Stage IIB	[Not Applicable]	Infiltrating Lobular Carcinoma	[Not Available]	2006	Post (prior bilateral ovariectomy OR >12 mo since LMP with no prior hysterectomy)	-19415	Alive	TUMOR FREE	2489	#N/A	[Not Available]	#N/A	#N/A	#N/A	#N/A	[Not Available]	Negative	#N/A	0	2489	0	2489	0	2489	0	2489
1082	TCGA-BH-A0EA	BRCA	72	FEMALE	WHITE	Stage IIA	[Not Applicable]	Infiltrating Ductal Carcinoma	[Not Available]	2008	Post (prior bilateral ovariectomy OR >12 mo since LMP with no prior hysterectomy)	-26548	Dead	TUMOR FREE	#N/A	991	[Not Available]	#N/A	#N/A	#N/A	#N/A	[Not Available]	Negative	#N/A	1	991	0	991	0	991	0	991
1083	TCGA-BH-A0EB	BRCA	69	FEMALE	WHITE	Stage IA	[Not Applicable]	Infiltrating Ductal Carcinoma	[Not Available]	2008	Post (prior bilateral ovariectomy OR >12 mo since LMP with no prior hysterectomy)	-25259	Alive	TUMOR FREE	745	#N/A	[Not Available]	#N/A	#N/A	#N/A	#N/A	[Not Available]	Negative	#N/A	0	745	0	745	0	745	0	745
1084	TCGA-BH-A0EE	BRCA	68	FEMALE	WHITE	Stage IIB	[Not Applicable]	Infiltrating Ductal Carcinoma	[Not Available]	2007	Post (prior bilateral ovariectomy OR >12 mo since LMP with no prior hysterectomy)	-24850	Alive	TUMOR FREE	943	#N/A	[Not Available]	#N/A	#N/A	#N/A	#N/A	[Not Available]	Negative	#N/A	0	943	0	943	0	943	0	943
1085	TCGA-BH-A0EI	BRCA	51	FEMALE	WHITE	Stage IIA	[Not Applicable]	Infiltrating Ductal Carcinoma	[Not Available]	2008	Peri (6-12 months since last menstrual period)	-18741	Alive	TUMOR FREE	1926	#N/A	[Not Available]	#N/A	#N/A	#N/A	#N/A	[Not Available]	Negative	#N/A	0	1926	0	1926	0	1926	0	1926
1086	TCGA-BH-A0GY	BRCA	67	FEMALE	WHITE	Stage IIA	[Not Applicable]	Infiltrating Ductal Carcinoma	[Not Available]	2008	Post (prior bilateral ovariectomy OR >12 mo since LMP with no prior hysterectomy)	-24493	Alive	TUMOR FREE	923	#N/A	[Not Available]	#N/A	#N/A	#N/A	#N/A	[Not Available]	Negative	#N/A	0	923	0	923	0	923	0	923
1087	TCGA-BH-A0GZ	BRCA	62	FEMALE	WHITE	Stage IIA	[Not Applicable]	Infiltrating Ductal Carcinoma	[Not Available]	2009	Post (prior bilateral ovariectomy OR >12 mo since LMP with no prior hysterectomy)	-22714	Alive	TUMOR FREE	328	#N/A	[Not Available]	#N/A	#N/A	#N/A	#N/A	[Not Available]	Negative	#N/A	0	328	0	328	0	328	0	328
1088	TCGA-BH-A0H0	BRCA	69	FEMALE	WHITE	Stage IA	[Not Applicable]	Infiltrating Ductal Carcinoma	[Not Available]	2009	Post (prior bilateral ovariectomy OR >12 mo since LMP with no prior hysterectomy)	-25223	Alive	TUMOR FREE	461	#N/A	[Not Available]	#N/A	#N/A	#N/A	#N/A	[Not Available]	Negative	#N/A	0	461	0	461	0	461	0	461
1089	TCGA-BH-A0H3	BRCA	46	FEMALE	WHITE	Stage I	[Not Applicable]	Infiltrating Ductal Carcinoma	[Not Available]	2008	Pre (<6 months since LMP AND no prior bilateral ovariectomy AND not on estrogen replacement)	-17152	Alive	TUMOR FREE	1928	#N/A	[Not Available]	#N/A	#N/A	#N/A	#N/A	[Not Available]	Negative	#N/A	0	1928	0	1928	0	1928	0	1928
1090	TCGA-BH-A0H5	BRCA	45	FEMALE	WHITE	Stage I	[Not Applicable]	Infiltrating Ductal Carcinoma	[Not Available]	2008	Post (prior bilateral ovariectomy OR >12 mo since LMP with no prior hysterectomy)	-16719	Alive	TUMOR FREE	1620	#N/A	[Not Available]	#N/A	#N/A	#N/A	#N/A	[Not Available]	Negative	#N/A	0	1620	0	1620	0	1620	0	1620
1091	TCGA-BH-A0H6	BRCA	82	FEMALE	WHITE	Stage I	[Not Applicable]	Infiltrating Ductal Carcinoma	[Not Available]	2008	Post (prior bilateral ovariectomy OR >12 mo since LMP with no prior hysterectomy)	-30125	Alive	TUMOR FREE	747	#N/A	[Not Available]	#N/A	#N/A	#N/A	#N/A	[Not Available]	Negative	#N/A	0	747	0	747	0	747	0	747
1092	TCGA-BH-A0H7	BRCA	65	FEMALE	WHITE	Stage IIIA	[Not Applicable]	Infiltrating Ductal Carcinoma	[Not Available]	2008	Post (prior bilateral ovariectomy OR >12 mo since LMP with no prior hysterectomy)	-23972	Alive	TUMOR FREE	702	#N/A	[Not Available]	#N/A	#N/A	#N/A	#N/A	[Not Available]	Negative	#N/A	0	702	0	702	0	702	0	702
1093	TCGA-BH-A0H9	BRCA	69	FEMALE	WHITE	Stage IIA	[Not Applicable]	Infiltrating Ductal Carcinoma	[Not Available]	2007	Post (prior bilateral ovariectomy OR >12 mo since LMP with no prior hysterectomy)	-25289	Alive	TUMOR FREE	1247	#N/A	[Not Available]	#N/A	#N/A	#N/A	#N/A	[Not Available]	Negative	#N/A	0	1247	0	1247	0	1247	0	1247
1094	TCGA-BH-A0HA	BRCA	31	FEMALE	WHITE	Stage I	[Not Applicable]	Infiltrating Ductal Carcinoma	[Not Available]	2008	Pre (<6 months since LMP AND no prior bilateral ovariectomy AND not on estrogen replacement)	-11379	Alive	TUMOR FREE	1611	#N/A	[Not Available]	#N/A	#N/A	#N/A	#N/A	[Not Available]	Negative	#N/A	0	1611	0	1611	0	1611	0	1611
1095	TCGA-BH-A0HB	BRCA	55	FEMALE	WHITE	Stage IA	[Not Applicable]	Infiltrating Ductal Carcinoma	[Not Available]	2008	Post (prior bilateral ovariectomy OR >12 mo since LMP with no prior hysterectomy)	-20448	Alive	TUMOR FREE	806	#N/A	[Not Available]	#N/A	#N/A	#N/A	#N/A	[Not Available]	Negative	#N/A	0	806	0	806	0	806	0	806
1096	TCGA-BH-A0HF	BRCA	77	FEMALE	WHITE	Stage IA	[Not Applicable]	Infiltrating Ductal Carcinoma	[Not Available]	2008	Post (prior bilateral ovariectomy OR >12 mo since LMP with no prior hysterectomy)	-28233	Alive	TUMOR FREE	727	#N/A	[Not Available]	#N/A	#N/A	#N/A	#N/A	[Not Available]	Negative	#N/A	0	727	0	727	0	727	0	727
1097	TCGA-BH-A0HI	BRCA	78	FEMALE	WHITE	Stage IA	[Not Applicable]	Infiltrating Ductal Carcinoma	[Not Available]	2008	Post (prior bilateral ovariectomy OR >12 mo since LMP with no prior hysterectomy)	-28644	Alive	TUMOR FREE	620	#N/A	[Not Available]	#N/A	#N/A	#N/A	#N/A	[Not Available]	Negative	#N/A	0	620	0	620	0	620	0	620
1098	TCGA-BH-A0HK	BRCA	81	FEMALE	WHITE	Stage IIB	[Not Applicable]	Infiltrating Ductal Carcinoma	[Not Available]	2010	Post (prior bilateral ovariectomy OR >12 mo since LMP with no prior hysterectomy)	-29751	Alive	TUMOR FREE	178	#N/A	[Not Available]	#N/A	#N/A	#N/A	#N/A	[Not Available]	Negative	#N/A	0	178	0	178	0	178	0	178
1099	TCGA-BH-A0HL	BRCA	56	FEMALE	WHITE	Stage IIB	[Not Applicable]	Infiltrating Ductal Carcinoma	[Not Available]	2009	Post (prior bilateral ovariectomy OR >12 mo since LMP with no prior hysterectomy)	-20804	Alive	TUMOR FREE	72	#N/A	[Not Available]	#N/A	#N/A	#N/A	#N/A	[Not Available]	Negative	#N/A	0	72	0	72	0	72	0	72	Redacted
1100	TCGA-BH-A0HN	BRCA	67	FEMALE	WHITE	Stage IA	[Not Applicable]	Infiltrating Ductal Carcinoma	[Not Available]	2009	Post (prior bilateral ovariectomy OR >12 mo since LMP with no prior hysterectomy)	-24731	Alive	TUMOR FREE	516	#N/A	[Not Available]	#N/A	#N/A	#N/A	#N/A	[Not Available]	Negative	#N/A	0	516	0	516	0	516	0	516	Redacted
1101	TCGA-BH-A0HO	BRCA	48	FEMALE	WHITE	Stage IIA	[Not Applicable]	Infiltrating Ductal Carcinoma	[Not Available]	2009	Pre (<6 months since LMP AND no prior bilateral ovariectomy AND not on estrogen replacement)	-17710	Alive	TUMOR FREE	76	#N/A	[Not Available]	#N/A	#N/A	#N/A	#N/A	[Not Available]	Negative	#N/A	0	76	0	76	0	76	0	76
1102	TCGA-BH-A0HP	BRCA	65	FEMALE	WHITE	Stage IIIA	[Not Applicable]	Infiltrating Lobular Carcinoma	[Not Available]	2009	Post (prior bilateral ovariectomy OR >12 mo since LMP with no prior hysterectomy)	-23883	Alive	TUMOR FREE	414	#N/A	[Not Available]	#N/A	#N/A	#N/A	#N/A	[Not Available]	Negative	#N/A	0	414	0	414	0	414	0	414
1103	TCGA-BH-A0HQ	BRCA	56	FEMALE	WHITE	Stage IIA	[Not Applicable]	Infiltrating Ductal Carcinoma	[Not Available]	2007	Post (prior bilateral ovariectomy OR >12 mo since LMP with no prior hysterectomy)	-20719	Alive	TUMOR FREE	1121	#N/A	[Not Available]	#N/A	#N/A	#N/A	#N/A	[Not Available]	Negative	#N/A	0	1121	0	1121	0	1121	0	1121
1104	TCGA-BH-A0HU	BRCA	52	FEMALE	WHITE	Stage IA	[Not Applicable]	Infiltrating Ductal Carcinoma	[Not Available]	2009	Peri (6-12 months since last menstrual period)	-19216	Alive	TUMOR FREE	392	#N/A	[Not Available]	#N/A	#N/A	#N/A	#N/A	[Not Available]	Negative	#N/A	0	392	0	392	0	392	0	392
1105	TCGA-BH-A0HW	BRCA	62	FEMALE	ASIAN	Stage IA	[Not Applicable]	Infiltrating Ductal Carcinoma	[Not Available]	2006	Post (prior bilateral ovariectomy OR >12 mo since LMP with no prior hysterectomy)	-22962	Alive	TUMOR FREE	1561	#N/A	[Not Available]	#N/A	#N/A	#N/A	#N/A	[Not Available]	Negative	#N/A	0	1561	0	1561	0	1561	0	1561
1106	TCGA-BH-A0HX	BRCA	54	FEMALE	WHITE	Stage IIB	[Not Applicable]	Infiltrating Ductal Carcinoma	[Not Available]	2008	Post (prior bilateral ovariectomy OR >12 mo since LMP with no prior hysterectomy)	-19900	Alive	TUMOR FREE	829	#N/A	[Not Available]	#N/A	#N/A	#N/A	#N/A	[Not Available]	Negative	#N/A	0	829	0	829	0	829	0	829
1107	TCGA-BH-A0HY	BRCA	60	FEMALE	WHITE	Stage I	[Not Applicable]	Infiltrating Ductal Carcinoma	[Not Available]	2009	Post (prior bilateral ovariectomy OR >12 mo since LMP with no prior hysterectomy)	-22179	Alive	TUMOR FREE	1545	#N/A	[Not Available]	#N/A	#N/A	#N/A	#N/A	[Not Available]	Negative	#N/A	0	1545	0	1545	0	1545	0	1545
1108	TCGA-BH-A0RX	BRCA	59	FEMALE	WHITE	Stage IIA	[Not Applicable]	Infiltrating Ductal Carcinoma	[Not Available]	2010	Post (prior bilateral ovariectomy OR >12 mo since LMP with no prior hysterectomy)	-21857	Alive	TUMOR FREE	170	#N/A	[Not Available]	#N/A	#N/A	#N/A	#N/A	[Not Available]	Negative	#N/A	0	170	0	170	0	170	0	170
1109	TCGA-BH-A0W3	BRCA	58	FEMALE	WHITE	Stage IIA	[Not Applicable]	Infiltrating Ductal Carcinoma	[Not Available]	2010	Indeterminate (neither Pre or Postmenopausal)	-21369	Alive	TUMOR FREE	728	#N/A	[Not Available]	#N/A	#N/A	#N/A	#N/A	[Not Available]	[Not Available]	#N/A	0	728	0	728	#N/A	#N/A	0	728
1110	TCGA-BH-A0W4	BRCA	46	FEMALE	WHITE	Stage IIA	[Not Applicable]	Infiltrating Ductal Carcinoma	[Not Available]	2010	[Not Available]	-16911	Alive	TUMOR FREE	759	#N/A	[Not Available]	#N/A	#N/A	#N/A	#N/A	[Not Available]	[Not Available]	#N/A	0	759	0	759	#N/A	#N/A	0	759
1111	TCGA-BH-A0W5	BRCA	77	FEMALE	WHITE	Stage IIA	[Not Applicable]	Infiltrating Ductal Carcinoma	[Not Available]	2008	[Not Available]	-28304	Alive	TUMOR FREE	1288	#N/A	[Not Available]	#N/A	#N/A	#N/A	#N/A	[Not Available]	Negative	#N/A	0	1288	0	1288	0	1288	0	1288
1112	TCGA-BH-A0W7	BRCA	49	FEMALE	WHITE	Stage I	[Not Applicable]	Infiltrating Ductal Carcinoma	[Not Available]	2008	[Not Available]	-17996	Alive	TUMOR FREE	1363	#N/A	[Not Available]	#N/A	#N/A	#N/A	#N/A	[Not Available]	Negative	#N/A	0	1363	0	1363	0	1363	0	1363
1113	TCGA-BH-A0WA	BRCA	82	FEMALE	WHITE	Stage I	[Not Applicable]	[Not Available]	[Not Available]	2008	[Not Available]	-30025	Alive	TUMOR FREE	701	#N/A	[Not Available]	#N/A	#N/A	#N/A	#N/A	[Not Available]	Negative	#N/A	0	701	0	701	0	701	0	701
1114	TCGA-BH-A18F	BRCA	50	FEMALE	WHITE	Stage IIA	[Not Applicable]	Infiltrating Ductal Carcinoma	[Not Available]	2010	Peri (6-12 months since last menstrual period)	-18594	Alive	TUMOR FREE	1001	#N/A	[Not Available]	#N/A	#N/A	#N/A	#N/A	[Not Available]	Negative	#N/A	0	1001	0	1001	0	1001	0	1001
1115	TCGA-BH-A18G	BRCA	81	FEMALE	WHITE	Stage IA	[Not Applicable]	Infiltrating Ductal Carcinoma	[Not Available]	2010	Post (prior bilateral ovariectomy OR >12 mo since LMP with no prior hysterectomy)	-29820	Alive	TUMOR FREE	149	#N/A	[Not Available]	#N/A	#N/A	#N/A	#N/A	[Not Available]	Negative	#N/A	0	149	0	149	0	149	0	149
1116	TCGA-BH-A18H	BRCA	63	FEMALE	WHITE	Stage IA	[Not Applicable]	Infiltrating Ductal Carcinoma	[Not Available]	2010	Post (prior bilateral ovariectomy OR >12 mo since LMP with no prior hysterectomy)	-23065	Alive	TUMOR FREE	652	#N/A	[Not Available]	#N/A	#N/A	#N/A	#N/A	[Not Available]	Negative	#N/A	0	652	0	652	0	652	0	652
1117	TCGA-BH-A18I	BRCA	53	FEMALE	WHITE	Stage IIA	[Not Applicable]	Infiltrating Ductal Carcinoma	[Not Available]	2010	Post (prior bilateral ovariectomy OR >12 mo since LMP with no prior hysterectomy)	-19489	Alive	TUMOR FREE	1093	#N/A	[Not Available]	#N/A	#N/A	#N/A	#N/A	[Not Available]	Negative	#N/A	0	1093	0	1093	0	1093	0	1093
1118	TCGA-BH-A18J	BRCA	56	FEMALE	WHITE	Stage IV	[Not Applicable]	Infiltrating Ductal Carcinoma	[Not Available]	2000	[Not Available]	-20678	Dead	WITH TUMOR	#N/A	612	[Not Available]	#N/A	#N/A	#N/A	#N/A	[Not Available]	Negative	#N/A	1	612	1	612	#N/A	#N/A	1	612
1119	TCGA-BH-A18K	BRCA	46	FEMALE	WHITE	Stage I	[Not Applicable]	Infiltrating Ductal Carcinoma	[Not Available]	1999	[Not Available]	-16824	Dead	WITH TUMOR	#N/A	2763	[Not Available]	#N/A	#N/A	#N/A	#N/A	[Not Available]	Negative	#N/A	1	2763	1	2763	#N/A	#N/A	1	2763
1120	TCGA-BH-A18L	BRCA	50	FEMALE	WHITE	Stage IIIA	[Not Applicable]	Infiltrating Ductal Carcinoma	[Not Available]	2003	[Not Available]	-18519	Dead	#N/A	#N/A	811	[Not Available]	#N/A	#N/A	#N/A	#N/A	[Not Available]	Negative	#N/A	1	811	#N/A	811	0	811	0	811
1121	TCGA-BH-A18M	BRCA	39	FEMALE	WHITE	Stage IIIA	[Not Applicable]	Infiltrating Ductal Carcinoma	[Not Available]	2001	[Not Available]	-14532	Dead	#N/A	#N/A	2207	[Not Available]	#N/A	#N/A	#N/A	#N/A	[Not Available]	Negative	#N/A	1	2207	#N/A	2207	0	2207	0	2207
1122	TCGA-BH-A18N	BRCA	88	FEMALE	WHITE	Stage IIA	[Not Applicable]	Infiltrating Ductal Carcinoma	[Not Available]	2001	[Not Available]	-32404	Dead	#N/A	#N/A	1148	[Not Available]	#N/A	#N/A	#N/A	#N/A	[Not Available]	Negative	#N/A	1	1148	#N/A	1148	0	1148	0	1148
1123	TCGA-BH-A18P	BRCA	60	FEMALE	WHITE	Stage I	[Not Applicable]	Infiltrating Ductal Carcinoma	[Not Available]	2003	[Not Available]	-22222	Dead	WITH TUMOR	#N/A	921	[Not Available]	#N/A	#N/A	#N/A	#N/A	[Not Available]	Negative	#N/A	1	921	1	921	#N/A	#N/A	1	921
1124	TCGA-BH-A18Q	BRCA	56	FEMALE	WHITE	Stage IIB	[Not Applicable]	Infiltrating Ductal Carcinoma	[Not Available]	2001	[Not Available]	-20675	Dead	#N/A	#N/A	1692	[Not Available]	#N/A	#N/A	#N/A	#N/A	[Not Available]	Negative	#N/A	1	1692	#N/A	1692	0	1692	0	1692
1125	TCGA-BH-A18R	BRCA	50	FEMALE	WHITE	Stage IIA	[Not Applicable]	Infiltrating Ductal Carcinoma	[Not Available]	2001	[Not Available]	-18524	Dead	TUMOR FREE	#N/A	1142	[Not Available]	#N/A	#N/A	#N/A	#N/A	[Not Available]	Negative	#N/A	1	1142	0	1142	0	1142	0	1142
1126	TCGA-BH-A18S	BRCA	79	FEMALE	WHITE	Stage I	[Not Applicable]	Mucinous Carcinoma	[Not Available]	2003	Post (prior bilateral ovariectomy OR >12 mo since LMP with no prior hysterectomy)	-28974	Dead	TUMOR FREE	#N/A	2009	[Not Available]	#N/A	#N/A	#N/A	#N/A	[Not Available]	Negative	#N/A	1	2009	0	2009	0	2009	0	2009
1127	TCGA-BH-A18T	BRCA	70	FEMALE	WHITE	Stage IIA	[Not Applicable]	Infiltrating Ductal Carcinoma	[Not Available]	2003	Post (prior bilateral ovariectomy OR >12 mo since LMP with no prior hysterectomy)	-25674	Dead	WITH TUMOR	#N/A	224	[Not Available]	#N/A	#N/A	#N/A	#N/A	[Not Available]	Negative	#N/A	1	224	1	224	#N/A	#N/A	1	224
1128	TCGA-BH-A18U	BRCA	72	FEMALE	WHITE	Stage IIIA	[Not Applicable]	Infiltrating Ductal Carcinoma	[Not Available]	2003	Post (prior bilateral ovariectomy OR >12 mo since LMP with no prior hysterectomy)	-26426	Dead	TUMOR FREE	#N/A	1563	[Not Available]	#N/A	#N/A	#N/A	#N/A	[Not Available]	Negative	#N/A	1	1563	0	1563	0	1563	0	1563
1129	TCGA-BH-A18V	BRCA	48	FEMALE	WHITE	Stage IIB	[Not Applicable]	Infiltrating Ductal Carcinoma	[Not Available]	2001	[Not Available]	-17682	Dead	#N/A	#N/A	1556	[Not Available]	#N/A	#N/A	#N/A	#N/A	[Not Available]	Negative	#N/A	1	1556	#N/A	1556	0	1556	0	1556
1130	TCGA-BH-A1EN	BRCA	78	FEMALE	WHITE	Stage IIA	[Not Applicable]	Infiltrating Ductal Carcinoma	[Not Available]	1999	Post (prior bilateral ovariectomy OR >12 mo since LMP with no prior hysterectomy)	-28724	Dead	TUMOR FREE	#N/A	2127	[Not Available]	#N/A	#N/A	#N/A	#N/A	[Not Available]	Negative	#N/A	1	2127	0	2127	0	2127	0	2127
1131	TCGA-BH-A1EO	BRCA	68	FEMALE	WHITE	Stage IIA	[Not Applicable]	Mixed Histology (please specify)	[Not Available]	1999	Post (prior bilateral ovariectomy OR >12 mo since LMP with no prior hysterectomy)	-25136	Dead	TUMOR FREE	#N/A	2798	[Not Available]	#N/A	#N/A	#N/A	#N/A	[Not Available]	[Not Available]	#N/A	1	2798	0	2798	#N/A	#N/A	0	2798
1132	TCGA-BH-A1ES	BRCA	35	FEMALE	WHITE	Stage IIB	[Not Applicable]	Infiltrating Ductal Carcinoma	[Not Available]	1999	Pre (<6 months since LMP AND no prior bilateral ovariectomy AND not on estrogen replacement)	-13138	Dead	WITH TUMOR	#N/A	3462	[Not Available]	#N/A	#N/A	#N/A	#N/A	[Not Available]	[Not Available]	#N/A	1	3462	1	3462	#N/A	#N/A	1	3462
1133	TCGA-BH-A1ET	BRCA	55	FEMALE	WHITE	Stage I	[Not Applicable]	Infiltrating Ductal Carcinoma	[Not Available]	1999	[Not Available]	-20425	Dead	TUMOR FREE	#N/A	2520	[Not Available]	#N/A	#N/A	#N/A	#N/A	[Not Available]	[Not Available]	#N/A	1	2520	0	2520	#N/A	#N/A	0	2520
1134	TCGA-BH-A1EU	BRCA	83	FEMALE	WHITE	Stage I	[Not Applicable]	Infiltrating Ductal Carcinoma	[Not Available]	1999	Post (prior bilateral ovariectomy OR >12 mo since LMP with no prior hysterectomy)	-30339	Dead	TUMOR FREE	#N/A	1286	[Not Available]	#N/A	#N/A	#N/A	#N/A	[Not Available]	[Not Available]	#N/A	1	1286	0	1286	#N/A	#N/A	0	1286
1135	TCGA-BH-A1EV	BRCA	45	FEMALE	WHITE	Stage IIIA	[Not Applicable]	Infiltrating Ductal Carcinoma	[Not Available]	1999	[Not Available]	-16504	Dead	WITH TUMOR	#N/A	365	[Not Available]	#N/A	#N/A	#N/A	#N/A	[Not Available]	[Not Available]	#N/A	1	365	1	365	#N/A	#N/A	1	365
1136	TCGA-BH-A1EW	BRCA	38	FEMALE	WHITE	Stage IIA	[Not Applicable]	Infiltrating Ductal Carcinoma	[Not Available]	1999	Pre (<6 months since LMP AND no prior bilateral ovariectomy AND not on estrogen replacement)	-14090	Dead	WITH TUMOR	#N/A	1694	[Not Available]	#N/A	#N/A	#N/A	#N/A	[Not Available]	[Not Available]	#N/A	1	1694	1	1694	#N/A	#N/A	1	1694
1137	TCGA-BH-A1EX	BRCA	67	FEMALE	WHITE	Stage IIB	[Not Applicable]	Infiltrating Ductal Carcinoma	[Not Available]	2000	Post (prior bilateral ovariectomy OR >12 mo since LMP with no prior hysterectomy)	-24544	Dead	WITH TUMOR	#N/A	1508	[Not Available]	#N/A	#N/A	#N/A	#N/A	[Not Available]	[Not Available]	#N/A	1	1508	1	1508	#N/A	#N/A	1	1508
1138	TCGA-BH-A1EY	BRCA	79	FEMALE	WHITE	Stage IIA	[Not Applicable]	Infiltrating Ductal Carcinoma	[Not Available]	2000	Post (prior bilateral ovariectomy OR >12 mo since LMP with no prior hysterectomy)	-28940	Dead	WITH TUMOR	#N/A	538	[Not Available]	Distant Metastasis	Lung	Liver	396	[Not Available]	[Not Available]	#N/A	1	538	1	538	#N/A	#N/A	1	396
1139	TCGA-BH-A1F0	BRCA	80	FEMALE	WHITE	Stage IIA	[Not Applicable]	Infiltrating Ductal Carcinoma	[Not Available]	2000	Post (prior bilateral ovariectomy OR >12 mo since LMP with no prior hysterectomy)	-29335	Dead	WITH TUMOR	#N/A	785	[Not Available]	#N/A	#N/A	#N/A	#N/A	[Not Available]	[Not Available]	#N/A	1	785	1	785	#N/A	#N/A	1	785
1140	TCGA-BH-A1F2	BRCA	53	FEMALE	WHITE	Stage IIIB	[Not Applicable]	Infiltrating Ductal Carcinoma	[Not Available]	1999	[Not Available]	-19701	Dead	TUMOR FREE	#N/A	959	[Not Available]	#N/A	#N/A	#N/A	#N/A	[Not Available]	[Not Available]	#N/A	1	959	0	959	#N/A	#N/A	0	959
1141	TCGA-BH-A1F5	BRCA	62	FEMALE	WHITE	Stage IIA	[Not Applicable]	Infiltrating Ductal Carcinoma	[Not Available]	2002	[Not Available]	-22842	Dead	TUMOR FREE	#N/A	2712	[Not Available]	#N/A	#N/A	#N/A	#N/A	[Not Available]	[Not Available]	#N/A	1	2712	0	2712	#N/A	#N/A	0	2712
1142	TCGA-BH-A1F6	BRCA	51	FEMALE	WHITE	[Not Available]	[Not Applicable]	Infiltrating Ductal Carcinoma	[Not Available]	1996	[Not Available]	-18691	Dead	#N/A	#N/A	2965	[Not Available]	#N/A	#N/A	#N/A	#N/A	[Not Available]	[Not Available]	#N/A	1	2965	#N/A	2965	#N/A	#N/A	0	2965
1143	TCGA-BH-A1F8	BRCA	90	FEMALE	WHITE	Stage IIIB	[Not Applicable]	Infiltrating Ductal Carcinoma	[Not Available]	1999	Post (prior bilateral ovariectomy OR >12 mo since LMP with no prior hysterectomy)	-32871	Dead	WITH TUMOR	#N/A	763	[Not Available]	#N/A	#N/A	#N/A	#N/A	[Not Available]	[Not Available]	#N/A	1	763	1	763	#N/A	#N/A	1	763
1144	TCGA-BH-A1FB	BRCA	60	FEMALE	WHITE	Stage IIB	[Not Applicable]	Infiltrating Ductal Carcinoma	[Not Available]	2000	Post (prior bilateral ovariectomy OR >12 mo since LMP with no prior hysterectomy)	-21933	Dead	WITH TUMOR	#N/A	3669	[Not Available]	#N/A	#N/A	#N/A	#N/A	[Not Available]	[Not Available]	#N/A	1	3669	1	3669	#N/A	#N/A	1	3669
1145	TCGA-BH-A1FC	BRCA	78	FEMALE	BLACK OR AFRICAN AMERICAN	Stage IIA	[Not Applicable]	Medullary Carcinoma	[Not Available]	1998	Post (prior bilateral ovariectomy OR >12 mo since LMP with no prior hysterectomy)	-28706	Dead	TUMOR FREE	#N/A	3472	[Not Available]	#N/A	#N/A	#N/A	#N/A	[Not Available]	[Not Available]	#N/A	1	3472	0	3472	#N/A	#N/A	0	3472
1146	TCGA-BH-A1FD	BRCA	68	FEMALE	WHITE	Stage I	[Not Applicable]	Infiltrating Ductal Carcinoma	[Not Available]	1998	Post (prior bilateral ovariectomy OR >12 mo since LMP with no prior hysterectomy)	-24940	Dead	WITH TUMOR	#N/A	1009	[Not Available]	#N/A	#N/A	#N/A	#N/A	[Not Available]	[Not Available]	#N/A	1	1009	1	1009	#N/A	#N/A	1	1009
1147	TCGA-BH-A1FE	BRCA	31	FEMALE	WHITE	Stage IIB	[Not Applicable]	Infiltrating Ductal Carcinoma	[Not Available]	1998	[Not Available]	-11650	Dead	WITH TUMOR	#N/A	2273	[Not Available]	#N/A	#N/A	#N/A	#N/A	[Not Available]	[Not Available]	#N/A	1	2273	1	2273	#N/A	#N/A	1	2273
1148	TCGA-BH-A1FG	BRCA	88	FEMALE	WHITE	Stage I	[Not Applicable]	Infiltrating Ductal Carcinoma	[Not Available]	1998	Post (prior bilateral ovariectomy OR >12 mo since LMP with no prior hysterectomy)	-32295	Dead	#N/A	#N/A	3736	[Not Available]	#N/A	#N/A	#N/A	#N/A	[Not Available]	[Not Available]	#N/A	1	3736	#N/A	3736	#N/A	#N/A	0	3736
1149	TCGA-BH-A1FH	BRCA	47	FEMALE	WHITE	Stage IV	[Not Applicable]	Infiltrating Ductal Carcinoma	[Not Available]	1998	[Not Available]	-17172	Dead	WITH TUMOR	#N/A	1034	[Not Available]	#N/A	#N/A	#N/A	#N/A	[Not Available]	[Not Available]	#N/A	1	1034	1	1034	#N/A	#N/A	1	1034
1150	TCGA-BH-A1FJ	BRCA	66	FEMALE	WHITE	Stage IIIA	[Not Applicable]	Infiltrating Ductal Carcinoma	[Not Available]	1998	[Not Available]	-24262	Dead	#N/A	#N/A	1927	[Not Available]	#N/A	#N/A	#N/A	#N/A	[Not Available]	[Not Available]	#N/A	1	1927	#N/A	1927	#N/A	#N/A	0	1927
1151	TCGA-BH-A1FL	BRCA	69	FEMALE	WHITE	Stage IIB	[Not Applicable]	Infiltrating Ductal Carcinoma	[Not Available]	1998	[Not Available]	-25558	Dead	WITH TUMOR	#N/A	1673	[Not Available]	#N/A	#N/A	#N/A	#N/A	[Not Available]	[Not Available]	#N/A	1	1673	1	1673	#N/A	#N/A	1	1673
1152	TCGA-BH-A1FM	BRCA	44	FEMALE	WHITE	Stage IIIA	[Not Applicable]	Infiltrating Ductal Carcinoma	[Not Available]	1998	[Not Available]	-16289	Dead	#N/A	#N/A	1388	[Not Available]	#N/A	#N/A	#N/A	#N/A	[Not Available]	[Not Available]	#N/A	1	1388	#N/A	1388	#N/A	#N/A	0	1388
1153	TCGA-BH-A1FN	BRCA	34	FEMALE	WHITE	Stage IIA	[Not Applicable]	Infiltrating Ductal Carcinoma	[Not Available]	1997	[Not Available]	-12525	Dead	WITH TUMOR	#N/A	2192	[Not Available]	#N/A	#N/A	#N/A	#N/A	[Not Available]	[Not Available]	#N/A	1	2192	1	2192	#N/A	#N/A	1	2192
1154	TCGA-BH-A1FR	BRCA	73	FEMALE	WHITE	Stage IIIB	[Not Applicable]	Other, specify	[Not Available]	1997	[Not Available]	-26684	Dead	WITH TUMOR	#N/A	1642	[Not Available]	#N/A	#N/A	#N/A	#N/A	[Not Available]	[Not Available]	#N/A	1	1642	1	1642	#N/A	#N/A	1	1642
1155	TCGA-BH-A1FU	BRCA	44	FEMALE	WHITE	Stage IA	[Not Applicable]	Infiltrating Ductal Carcinoma	[Not Available]	1997	[Not Available]	-16174	Dead	WITH TUMOR	#N/A	1688	[Not Available]	#N/A	#N/A	#N/A	#N/A	[Not Available]	[Not Available]	#N/A	1	1688	1	1688	#N/A	#N/A	1	1688
1156	TCGA-BH-A201	BRCA	64	FEMALE	WHITE	Stage IA	[Not Applicable]	Infiltrating Ductal Carcinoma	[Not Available]	2011	Post (prior bilateral ovariectomy OR >12 mo since LMP with no prior hysterectomy)	-23423	Alive	TUMOR FREE	856	#N/A	[Not Available]	#N/A	#N/A	#N/A	#N/A	[Not Available]	[Not Available]	#N/A	0	856	0	856	#N/A	#N/A	0	856
1157	TCGA-BH-A202	BRCA	60	FEMALE	WHITE	Stage II	[Not Applicable]	Infiltrating Ductal Carcinoma	[Not Available]	2011	Post (prior bilateral ovariectomy OR >12 mo since LMP with no prior hysterectomy)	-22052	Alive	TUMOR FREE	795	#N/A	[Not Available]	#N/A	#N/A	#N/A	#N/A	[Not Available]	[Not Available]	#N/A	0	795	0	795	#N/A	#N/A	0	795
1158	TCGA-BH-A203	BRCA	78	FEMALE	WHITE	Stage IIB	[Not Applicable]	Infiltrating Ductal Carcinoma	[Not Available]	1996	Post (prior bilateral ovariectomy OR >12 mo since LMP with no prior hysterectomy)	-28609	Dead	WITH TUMOR	#N/A	1174	[Not Available]	#N/A	#N/A	#N/A	#N/A	[Not Available]	[Not Available]	#N/A	1	1174	1	1174	#N/A	#N/A	1	1174
1159	TCGA-BH-A204	BRCA	80	FEMALE	WHITE	Stage IIB	[Not Applicable]	Infiltrating Ductal Carcinoma	[Not Available]	1996	Post (prior bilateral ovariectomy OR >12 mo since LMP with no prior hysterectomy)	-29529	Dead	#N/A	#N/A	2534	[Not Available]	#N/A	#N/A	#N/A	#N/A	[Not Available]	[Not Available]	#N/A	1	2534	#N/A	2534	#N/A	#N/A	0	2534
1160	TCGA-BH-A208	BRCA	48	FEMALE	WHITE	Stage IIB	[Not Applicable]	Infiltrating Ductal Carcinoma	[Not Available]	1995	[Not Available]	-17715	Dead	TUMOR FREE	#N/A	1759	[Not Available]	#N/A	#N/A	#N/A	#N/A	[Not Available]	[Not Available]	#N/A	1	1759	0	1759	#N/A	#N/A	0	1759
1161	TCGA-BH-A209	BRCA	77	FEMALE	BLACK OR AFRICAN AMERICAN	Stage I	[Not Applicable]	Medullary Carcinoma	[Not Available]	1996	Post (prior bilateral ovariectomy OR >12 mo since LMP with no prior hysterectomy)	-28403	Dead	TUMOR FREE	#N/A	3959	[Not Available]	#N/A	#N/A	#N/A	#N/A	[Not Available]	[Not Available]	#N/A	1	3959	0	3959	#N/A	#N/A	0	3959
1162	TCGA-BH-A28O	BRCA	50	FEMALE	WHITE	Stage IIIC	[Not Applicable]	Infiltrating Lobular Carcinoma	[Not Available]	2010	[Not Available]	-18501	Alive	TUMOR FREE	1120	#N/A	[Not Available]	#N/A	#N/A	#N/A	#N/A	[Not Available]	Negative	#N/A	0	1120	0	1120	0	1120	0	1120
1163	TCGA-BH-A28Q	BRCA	46	FEMALE	WHITE	Stage IIB	[Not Applicable]	Infiltrating Lobular Carcinoma	[Not Available]	2010	Pre (<6 months since LMP AND no prior bilateral ovariectomy AND not on estrogen replacement)	-16882	Alive	TUMOR FREE	1119	#N/A	[Not Available]	#N/A	#N/A	#N/A	#N/A	[Not Available]	[Not Available]	#N/A	0	1119	0	1119	#N/A	#N/A	0	1119
1164	TCGA-BH-A2L8	BRCA	45	FEMALE	WHITE	Stage IIA	[Not Applicable]	Infiltrating Lobular Carcinoma	[Not Available]	2011	Pre (<6 months since LMP AND no prior bilateral ovariectomy AND not on estrogen replacement)	-16658	Alive	TUMOR FREE	612	#N/A	[Not Available]	#N/A	#N/A	#N/A	#N/A	[Not Available]	Negative	#N/A	0	612	0	612	0	612	0	612
1165	TCGA-BH-A42T	BRCA	75	FEMALE	BLACK OR AFRICAN AMERICAN	Stage IIA	[Not Applicable]	Infiltrating Lobular Carcinoma	[Not Available]	2012	Post (prior bilateral ovariectomy OR >12 mo since LMP with no prior hysterectomy)	-27731	Dead	TUMOR FREE	#N/A	320	[Not Available]	#N/A	#N/A	#N/A	#N/A	[Not Available]	Negative	#N/A	1	320	0	320	0	320	0	320
1166	TCGA-BH-A42U	BRCA	80	FEMALE	BLACK OR AFRICAN AMERICAN	Stage IIA	[Not Applicable]	Infiltrating Lobular Carcinoma	[Not Available]	2004	Post (prior bilateral ovariectomy OR >12 mo since LMP with no prior hysterectomy)	-29330	Alive	TUMOR FREE	3364	#N/A	[Not Available]	#N/A	#N/A	#N/A	#N/A	[Not Available]	Negative	#N/A	0	3364	0	3364	0	3364	0	3364
1167	TCGA-BH-A42V	BRCA	41	FEMALE	BLACK OR AFRICAN AMERICAN	Stage IB	[Not Applicable]	Infiltrating Ductal Carcinoma	[Not Available]	2012	Pre (<6 months since LMP AND no prior bilateral ovariectomy AND not on estrogen replacement)	-15158	Alive	TUMOR FREE	635	#N/A	[Not Available]	#N/A	#N/A	#N/A	#N/A	[Not Available]	Negative	#N/A	0	635	0	635	0	635	0	635
1168	TCGA-BH-A5IZ	BRCA	51	FEMALE	BLACK OR AFRICAN AMERICAN	Stage IIB	[Not Applicable]	Infiltrating Ductal Carcinoma	[Not Available]	2012	Post (prior bilateral ovariectomy OR >12 mo since LMP with no prior hysterectomy)	-18927	Alive	TUMOR FREE	567	#N/A	[Not Available]	#N/A	#N/A	#N/A	#N/A	[Not Available]	Negative	#N/A	0	567	0	567	0	567	0	567
1169	TCGA-BH-A5J0	BRCA	63	FEMALE	BLACK OR AFRICAN AMERICAN	Stage IA	[Not Applicable]	Infiltrating Ductal Carcinoma	[Not Available]	2012	Post (prior bilateral ovariectomy OR >12 mo since LMP with no prior hysterectomy)	-23072	Alive	TUMOR FREE	715	#N/A	[Not Available]	#N/A	#N/A	#N/A	#N/A	[Not Available]	Negative	#N/A	0	715	0	715	0	715	0	715
1170	TCGA-BH-A6R8	BRCA	46	FEMALE	BLACK OR AFRICAN AMERICAN	Stage IIA	[Not Applicable]	Infiltrating Ductal Carcinoma	[Not Available]	2012	[Unknown]	-16829	Alive	TUMOR FREE	293	#N/A	[Not Available]	#N/A	#N/A	#N/A	#N/A	[Not Available]	Negative	#N/A	0	293	0	293	0	293	0	293
1171	TCGA-BH-A6R9	BRCA	61	FEMALE	WHITE	Stage IIA	[Not Applicable]	Metaplastic Carcinoma	[Not Available]	2012	Post (prior bilateral ovariectomy OR >12 mo since LMP with no prior hysterectomy)	-22325	Alive	TUMOR FREE	160	#N/A	[Not Available]	#N/A	#N/A	#N/A	#N/A	[Not Available]	Negative	#N/A	0	160	0	160	0	160	0	160
1172	TCGA-BH-A8FY	BRCA	87	FEMALE	WHITE	Stage IA	[Not Applicable]	Infiltrating Lobular Carcinoma	[Not Available]	2012	Post (prior bilateral ovariectomy OR >12 mo since LMP with no prior hysterectomy)	-31932	Dead	TUMOR FREE	#N/A	295	[Not Available]	#N/A	#N/A	#N/A	#N/A	[Not Available]	Negative	#N/A	1	295	0	295	0	295	0	295
1173	TCGA-BH-A8FZ	BRCA	58	FEMALE	WHITE	Stage IA	[Not Applicable]	Infiltrating Lobular Carcinoma	[Not Available]	2012	Post (prior bilateral ovariectomy OR >12 mo since LMP with no prior hysterectomy)	-21343	Alive	TUMOR FREE	574	#N/A	[Not Available]	#N/A	#N/A	#N/A	#N/A	[Not Available]	Negative	#N/A	0	574	0	574	0	574	0	574
1174	TCGA-BH-A8G0	BRCA	54	FEMALE	WHITE	Stage IIB	[Not Applicable]	Infiltrating Lobular Carcinoma	[Not Available]	2012	Peri (6-12 months since last menstrual period)	-19975	Alive	TUMOR FREE	662	#N/A	[Not Available]	#N/A	#N/A	#N/A	#N/A	[Not Available]	Negative	#N/A	0	662	0	662	0	662	0	662
1175	TCGA-BH-AB28	BRCA	53	FEMALE	WHITE	Stage IIIA	[Not Applicable]	Infiltrating Lobular Carcinoma	[Not Available]	2013	[Unknown]	-19570	Alive	TUMOR FREE	287	#N/A	[Not Available]	#N/A	#N/A	#N/A	#N/A	[Not Available]	Negative	#N/A	0	287	0	287	0	287	0	287
1176	TCGA-C8-A12K	BRCA	80	FEMALE	ASIAN	Stage IIB	[Not Applicable]	Infiltrating Ductal Carcinoma	[Not Available]	2010	Post (prior bilateral ovariectomy OR >12 mo since LMP with no prior hysterectomy)	-29463	Alive	TUMOR FREE	0	#N/A	[Not Available]	#N/A	#N/A	#N/A	#N/A	[Not Available]	Negative	#N/A	0	0	0	0	0	0	0	0
1177	TCGA-C8-A12L	BRCA	67	FEMALE	ASIAN	Stage IIA	[Not Applicable]	Infiltrating Ductal Carcinoma	[Not Available]	2010	Post (prior bilateral ovariectomy OR >12 mo since LMP with no prior hysterectomy)	-24710	Alive	TUMOR FREE	363	#N/A	[Not Available]	#N/A	#N/A	#N/A	#N/A	[Not Available]	Negative	#N/A	0	363	0	363	0	363	0	363
1178	TCGA-C8-A12M	BRCA	70	FEMALE	ASIAN	Stage IIA	[Not Applicable]	Infiltrating Ductal Carcinoma	[Not Available]	2010	Post (prior bilateral ovariectomy OR >12 mo since LMP with no prior hysterectomy)	-25811	Alive	TUMOR FREE	358	#N/A	[Not Available]	#N/A	#N/A	#N/A	#N/A	[Not Available]	Negative	#N/A	0	358	0	358	0	358	0	358
1179	TCGA-C8-A12N	BRCA	58	FEMALE	ASIAN	Stage IIA	[Not Applicable]	Infiltrating Ductal Carcinoma	[Not Available]	2010	Post (prior bilateral ovariectomy OR >12 mo since LMP with no prior hysterectomy)	-21428	Alive	TUMOR FREE	358	#N/A	[Not Available]	#N/A	#N/A	#N/A	#N/A	[Not Available]	Negative	#N/A	0	358	0	358	0	358	0	358
1180	TCGA-C8-A12O	BRCA	50	FEMALE	ASIAN	Stage IIA	[Not Applicable]	Infiltrating Ductal Carcinoma	[Not Available]	2010	Pre (<6 months since LMP AND no prior bilateral ovariectomy AND not on estrogen replacement)	-18506	Alive	TUMOR FREE	385	#N/A	[Not Available]	#N/A	#N/A	#N/A	#N/A	[Not Available]	Negative	#N/A	0	385	0	385	0	385	0	385
1181	TCGA-C8-A12P	BRCA	55	FEMALE	ASIAN	Stage IIB	[Not Applicable]	Infiltrating Ductal Carcinoma	[Not Available]	2010	Post (prior bilateral ovariectomy OR >12 mo since LMP with no prior hysterectomy)	-20332	Alive	TUMOR FREE	358	#N/A	[Not Available]	#N/A	#N/A	#N/A	#N/A	[Not Available]	Negative	#N/A	0	358	0	358	0	358	0	358
1182	TCGA-C8-A12Q	BRCA	78	FEMALE	ASIAN	Stage IIIA	[Not Applicable]	Infiltrating Ductal Carcinoma	[Not Available]	2010	Post (prior bilateral ovariectomy OR >12 mo since LMP with no prior hysterectomy)	-28733	Dead	WITH TUMOR	#N/A	385	[Not Available]	#N/A	#N/A	#N/A	#N/A	[Not Available]	Negative	#N/A	1	385	1	385	#N/A	#N/A	1	385
1183	TCGA-C8-A12T	BRCA	43	FEMALE	ASIAN	Stage IIA	[Not Applicable]	Infiltrating Ductal Carcinoma	[Not Available]	2010	Pre (<6 months since LMP AND no prior bilateral ovariectomy AND not on estrogen replacement)	#N/A	Alive	TUMOR FREE	0	#N/A	[Not Available]	#N/A	#N/A	#N/A	#N/A	[Not Available]	Negative	#N/A	0	0	0	0	0	0	0	0
1184	TCGA-C8-A12U	BRCA	46	FEMALE	ASIAN	Stage IIB	[Not Applicable]	Infiltrating Ductal Carcinoma	[Not Available]	2010	Pre (<6 months since LMP AND no prior bilateral ovariectomy AND not on estrogen replacement)	-17045	Alive	TUMOR FREE	385	#N/A	[Not Available]	#N/A	#N/A	#N/A	#N/A	[Not Available]	Negative	#N/A	0	385	0	385	0	385	0	385
1185	TCGA-C8-A12V	BRCA	55	FEMALE	ASIAN	Stage IIA	[Not Applicable]	Infiltrating Ductal Carcinoma	[Not Available]	2010	Post (prior bilateral ovariectomy OR >12 mo since LMP with no prior hysterectomy)	-20346	Alive	TUMOR FREE	385	#N/A	[Not Available]	#N/A	#N/A	#N/A	#N/A	[Not Available]	[Not Available]	#N/A	0	385	0	385	#N/A	#N/A	0	385
1186	TCGA-C8-A12W	BRCA	49	FEMALE	ASIAN	Stage IIIB	[Not Applicable]	Infiltrating Ductal Carcinoma	[Not Available]	2010	Pre (<6 months since LMP AND no prior bilateral ovariectomy AND not on estrogen replacement)	-18140	Alive	TUMOR FREE	385	#N/A	[Not Available]	#N/A	#N/A	#N/A	#N/A	[Not Available]	Negative	#N/A	0	385	0	385	0	385	0	385
1187	TCGA-C8-A12X	BRCA	62	FEMALE	ASIAN	Stage IIB	[Not Applicable]	Mucinous Carcinoma	[Not Available]	2010	Post (prior bilateral ovariectomy OR >12 mo since LMP with no prior hysterectomy)	-22889	Alive	TUMOR FREE	385	#N/A	[Not Available]	#N/A	#N/A	#N/A	#N/A	[Not Available]	Negative	#N/A	0	385	0	385	0	385	0	385
1188	TCGA-C8-A12Y	BRCA	44	FEMALE	ASIAN	Stage IIB	[Not Applicable]	Infiltrating Ductal Carcinoma	[Not Available]	2010	Pre (<6 months since LMP AND no prior bilateral ovariectomy AND not on estrogen replacement)	#N/A	Alive	TUMOR FREE	1476	#N/A	[Not Available]	#N/A	#N/A	#N/A	#N/A	[Not Available]	Negative	#N/A	0	1476	0	1476	0	1476	0	1476
1189	TCGA-C8-A12Z	BRCA	45	FEMALE	ASIAN	Stage IIB	[Not Applicable]	Infiltrating Ductal Carcinoma	[Not Available]	2010	Peri (6-12 months since last menstrual period)	-16508	Alive	TUMOR FREE	382	#N/A	[Not Available]	#N/A	#N/A	#N/A	#N/A	[Not Available]	Negative	#N/A	0	382	0	382	0	382	0	382
1190	TCGA-C8-A130	BRCA	52	FEMALE	ASIAN	Stage IIIA	[Not Applicable]	Infiltrating Ductal Carcinoma	[Not Available]	2010	Peri (6-12 months since last menstrual period)	-19117	Alive	TUMOR FREE	370	#N/A	[Not Available]	#N/A	#N/A	#N/A	#N/A	[Not Available]	Negative	#N/A	0	370	0	370	0	370	0	370
1191	TCGA-C8-A131	BRCA	82	FEMALE	ASIAN	Stage IIIA	[Not Applicable]	Infiltrating Ductal Carcinoma	[Not Available]	2010	Post (prior bilateral ovariectomy OR >12 mo since LMP with no prior hysterectomy)	-29966	Alive	TUMOR FREE	411	#N/A	[Not Available]	#N/A	#N/A	#N/A	#N/A	[Not Available]	Negative	#N/A	0	411	0	411	0	411	0	411
1192	TCGA-C8-A132	BRCA	56	FEMALE	ASIAN	Stage IIB	[Not Applicable]	Infiltrating Ductal Carcinoma	[Not Available]	2010	Post (prior bilateral ovariectomy OR >12 mo since LMP with no prior hysterectomy)	-20471	Alive	TUMOR FREE	383	#N/A	[Not Available]	#N/A	#N/A	#N/A	#N/A	[Not Available]	Negative	#N/A	0	383	0	383	0	383	0	383
1193	TCGA-C8-A133	BRCA	65	FEMALE	WHITE	Stage IIIA	[Not Applicable]	Other, specify	[Not Available]	2010	Post (prior bilateral ovariectomy OR >12 mo since LMP with no prior hysterectomy)	-23922	Alive	TUMOR FREE	0	#N/A	[Not Available]	#N/A	#N/A	#N/A	#N/A	[Not Available]	Negative	#N/A	0	0	0	0	0	0	0	0
1194	TCGA-C8-A134	BRCA	52	FEMALE	ASIAN	Stage IIA	[Not Applicable]	Infiltrating Ductal Carcinoma	[Not Available]	2010	Peri (6-12 months since last menstrual period)	-19010	Alive	TUMOR FREE	383	#N/A	[Not Available]	#N/A	#N/A	#N/A	#N/A	[Not Available]	Negative	#N/A	0	383	0	383	0	383	0	383
1195	TCGA-C8-A135	BRCA	64	FEMALE	ASIAN	Stage IIB	[Not Applicable]	Infiltrating Ductal Carcinoma	[Not Available]	2010	Post (prior bilateral ovariectomy OR >12 mo since LMP with no prior hysterectomy)	-23667	Alive	TUMOR FREE	393	#N/A	[Not Available]	#N/A	#N/A	#N/A	#N/A	[Not Available]	Negative	#N/A	0	393	0	393	0	393	0	393
1196	TCGA-C8-A137	BRCA	34	FEMALE	ASIAN	Stage IIB	[Not Applicable]	Infiltrating Ductal Carcinoma	[Not Available]	2010	Pre (<6 months since LMP AND no prior bilateral ovariectomy AND not on estrogen replacement)	-12729	Alive	WITH TUMOR	379	#N/A	[Not Available]	Locoregional Recurrence	#N/A	#N/A	136	[Not Available]	Negative	#N/A	0	379	0	379	1	136	1	136
1197	TCGA-C8-A138	BRCA	54	FEMALE	ASIAN	Stage IIIA	[Not Applicable]	Infiltrating Ductal Carcinoma	[Not Available]	2010	Post (prior bilateral ovariectomy OR >12 mo since LMP with no prior hysterectomy)	-20053	Alive	TUMOR FREE	380	#N/A	[Not Available]	#N/A	#N/A	#N/A	#N/A	[Not Available]	Negative	#N/A	0	380	0	380	0	380	0	380
1198	TCGA-C8-A1HE	BRCA	59	FEMALE	ASIAN	Stage IIA	[Not Applicable]	Infiltrating Ductal Carcinoma	[Not Available]	2010	Post (prior bilateral ovariectomy OR >12 mo since LMP with no prior hysterectomy)	#N/A	Alive	TUMOR FREE	375	#N/A	[Not Available]	#N/A	#N/A	#N/A	#N/A	[Not Available]	Negative	#N/A	0	375	0	375	0	375	0	375
1199	TCGA-C8-A1HF	BRCA	48	FEMALE	ASIAN	Stage IIA	[Not Applicable]	Infiltrating Ductal Carcinoma	[Not Available]	2010	Pre (<6 months since LMP AND no prior bilateral ovariectomy AND not on estrogen replacement)	#N/A	Alive	TUMOR FREE	332	#N/A	[Not Available]	#N/A	#N/A	#N/A	#N/A	[Not Available]	Negative	#N/A	0	332	0	332	0	332	0	332
1200	TCGA-C8-A1HG	BRCA	50	FEMALE	ASIAN	Stage IIA	[Not Applicable]	Infiltrating Ductal Carcinoma	[Not Available]	2010	Pre (<6 months since LMP AND no prior bilateral ovariectomy AND not on estrogen replacement)	#N/A	Alive	TUMOR FREE	345	#N/A	[Not Available]	#N/A	#N/A	#N/A	#N/A	[Not Available]	Negative	#N/A	0	345	0	345	0	345	0	345
1201	TCGA-C8-A1HI	BRCA	40	FEMALE	ASIAN	Stage IIIA	[Not Applicable]	Infiltrating Ductal Carcinoma	[Not Available]	2010	Pre (<6 months since LMP AND no prior bilateral ovariectomy AND not on estrogen replacement)	#N/A	Alive	TUMOR FREE	343	#N/A	[Not Available]	#N/A	#N/A	#N/A	#N/A	[Not Available]	Negative	#N/A	0	343	0	343	0	343	0	343
1202	TCGA-C8-A1HJ	BRCA	53	FEMALE	ASIAN	Stage IIA	[Not Applicable]	Infiltrating Ductal Carcinoma	[Not Available]	2010	Peri (6-12 months since last menstrual period)	-19629	Alive	TUMOR FREE	5	#N/A	[Not Available]	#N/A	#N/A	#N/A	#N/A	[Not Available]	Negative	#N/A	0	5	0	5	0	5	0	5
1203	TCGA-C8-A1HK	BRCA	53	FEMALE	ASIAN	Stage IIB	[Not Applicable]	Infiltrating Ductal Carcinoma	[Not Available]	2010	Peri (6-12 months since last menstrual period)	#N/A	Alive	TUMOR FREE	366	#N/A	[Not Available]	#N/A	#N/A	#N/A	#N/A	[Not Available]	Negative	#N/A	0	366	0	366	0	366	0	366
1204	TCGA-C8-A1HL	BRCA	38	FEMALE	ASIAN	Stage IIIA	[Not Applicable]	Other, specify	[Not Available]	2010	Pre (<6 months since LMP AND no prior bilateral ovariectomy AND not on estrogen replacement)	#N/A	Alive	TUMOR FREE	317	#N/A	[Not Available]	#N/A	#N/A	#N/A	#N/A	[Not Available]	Negative	#N/A	0	317	0	317	0	317	0	317
1205	TCGA-C8-A1HM	BRCA	74	FEMALE	ASIAN	Stage IIA	[Not Applicable]	Infiltrating Ductal Carcinoma	[Not Available]	2010	Post (prior bilateral ovariectomy OR >12 mo since LMP with no prior hysterectomy)	-27063	Alive	TUMOR FREE	375	#N/A	[Not Available]	#N/A	#N/A	#N/A	#N/A	[Not Available]	Negative	#N/A	0	375	0	375	0	375	0	375
1206	TCGA-C8-A1HN	BRCA	56	FEMALE	ASIAN	Stage IIA	[Not Applicable]	Infiltrating Ductal Carcinoma	[Not Available]	2010	Post (prior bilateral ovariectomy OR >12 mo since LMP with no prior hysterectomy)	-20712	Alive	TUMOR FREE	394	#N/A	[Not Available]	#N/A	#N/A	#N/A	#N/A	[Not Available]	Negative	#N/A	0	394	0	394	0	394	0	394
1207	TCGA-C8-A1HO	BRCA	34	FEMALE	ASIAN	Stage IIIC	[Not Applicable]	Infiltrating Ductal Carcinoma	[Not Available]	2010	Pre (<6 months since LMP AND no prior bilateral ovariectomy AND not on estrogen replacement)	-12715	Alive	TUMOR FREE	375	#N/A	[Not Available]	#N/A	#N/A	#N/A	#N/A	[Not Available]	Negative	#N/A	0	375	0	375	0	375	0	375
1208	TCGA-C8-A26V	BRCA	47	FEMALE	ASIAN	Stage IIIA	[Not Applicable]	Infiltrating Ductal Carcinoma	[Not Available]	2010	Peri (6-12 months since last menstrual period)	-17468	Alive	TUMOR FREE	616	#N/A	[Not Available]	#N/A	#N/A	#N/A	#N/A	[Not Available]	Negative	#N/A	0	616	0	616	0	616	0	616
1209	TCGA-C8-A26W	BRCA	58	FEMALE	ASIAN	Stage IIB	[Not Applicable]	Infiltrating Ductal Carcinoma	[Not Available]	2010	Post (prior bilateral ovariectomy OR >12 mo since LMP with no prior hysterectomy)	-21391	Alive	TUMOR FREE	381	#N/A	[Not Available]	#N/A	#N/A	#N/A	#N/A	[Not Available]	Negative	#N/A	0	381	0	381	0	381	0	381
1210	TCGA-C8-A26X	BRCA	58	FEMALE	ASIAN	Stage IIA	[Not Applicable]	Infiltrating Ductal Carcinoma	[Not Available]	2010	Post (prior bilateral ovariectomy OR >12 mo since LMP with no prior hysterectomy)	-21463	Alive	TUMOR FREE	376	#N/A	[Not Available]	#N/A	#N/A	#N/A	#N/A	[Not Available]	Negative	#N/A	0	376	0	376	0	376	0	376
1211	TCGA-C8-A26Y	BRCA	90	FEMALE	ASIAN	Stage IIA	[Not Applicable]	Infiltrating Ductal Carcinoma	[Not Available]	2010	Post (prior bilateral ovariectomy OR >12 mo since LMP with no prior hysterectomy)	-32872	Alive	TUMOR FREE	394	#N/A	[Not Available]	#N/A	#N/A	#N/A	#N/A	[Not Available]	Negative	#N/A	0	394	0	394	0	394	0	394
1212	TCGA-C8-A26Z	BRCA	59	FEMALE	ASIAN	Stage IIA	[Not Applicable]	Infiltrating Ductal Carcinoma	[Not Available]	2010	Post (prior bilateral ovariectomy OR >12 mo since LMP with no prior hysterectomy)	#N/A	Alive	TUMOR FREE	470	#N/A	[Not Available]	#N/A	#N/A	#N/A	#N/A	[Not Available]	Negative	#N/A	0	470	0	470	0	470	0	470
1213	TCGA-C8-A273	BRCA	29	FEMALE	ASIAN	Stage IIB	[Not Applicable]	Infiltrating Ductal Carcinoma	[Not Available]	2010	Pre (<6 months since LMP AND no prior bilateral ovariectomy AND not on estrogen replacement)	#N/A	Alive	TUMOR FREE	513	#N/A	[Not Available]	#N/A	#N/A	#N/A	#N/A	[Not Available]	Negative	#N/A	0	513	0	513	0	513	0	513
1214	TCGA-C8-A274	BRCA	63	FEMALE	ASIAN	Stage IIA	[Not Applicable]	Infiltrating Ductal Carcinoma	[Not Available]	2010	Post (prior bilateral ovariectomy OR >12 mo since LMP with no prior hysterectomy)	-23337	Alive	TUMOR FREE	508	#N/A	[Not Available]	#N/A	#N/A	#N/A	#N/A	[Not Available]	Negative	#N/A	0	508	0	508	0	508	0	508
1215	TCGA-C8-A275	BRCA	56	FEMALE	ASIAN	Stage IIA	[Not Applicable]	Infiltrating Ductal Carcinoma	[Not Available]	2010	Post (prior bilateral ovariectomy OR >12 mo since LMP with no prior hysterectomy)	-20774	Alive	TUMOR FREE	1	#N/A	[Not Available]	#N/A	#N/A	#N/A	#N/A	[Not Available]	Negative	#N/A	0	1	0	1	0	1	0	1
1216	TCGA-C8-A278	BRCA	61	FEMALE	ASIAN	Stage IIIA	[Not Applicable]	Infiltrating Ductal Carcinoma	[Not Available]	2010	Post (prior bilateral ovariectomy OR >12 mo since LMP with no prior hysterectomy)	-22598	Alive	TUMOR FREE	297	#N/A	[Not Available]	#N/A	#N/A	#N/A	#N/A	[Not Available]	Negative	#N/A	0	297	0	297	0	297	0	297
1217	TCGA-C8-A27A	BRCA	48	FEMALE	ASIAN	Stage IIB	[Not Applicable]	Infiltrating Ductal Carcinoma	[Not Available]	2010	Peri (6-12 months since last menstrual period)	-17779	Alive	TUMOR FREE	747	#N/A	[Not Available]	#N/A	#N/A	#N/A	#N/A	[Not Available]	Negative	#N/A	0	747	0	747	0	747	0	747
1218	TCGA-C8-A27B	BRCA	48	FEMALE	ASIAN	Stage IIB	[Not Applicable]	Infiltrating Ductal Carcinoma	[Not Available]	2011	Peri (6-12 months since last menstrual period)	-17763	Alive	TUMOR FREE	439	#N/A	[Not Available]	#N/A	#N/A	#N/A	#N/A	[Not Available]	Negative	#N/A	0	439	0	439	0	439	0	439
1219	TCGA-C8-A3M7	BRCA	60	FEMALE	ASIAN	Stage IIIB	[Not Applicable]	Infiltrating Lobular Carcinoma	[Not Available]	2010	Post (prior bilateral ovariectomy OR >12 mo since LMP with no prior hysterectomy)	-22096	Dead	WITH TUMOR	#N/A	1034	[Not Available]	Locoregional Recurrence	#N/A	#N/A	1034	[Not Available]	Negative	#N/A	1	1034	1	1034	1	1034	1	1034
1220	TCGA-C8-A3M8	BRCA	68	FEMALE	ASIAN	Stage IA	[Not Applicable]	Infiltrating Lobular Carcinoma	[Not Available]	2011	Post (prior bilateral ovariectomy OR >12 mo since LMP with no prior hysterectomy)	-24877	Alive	TUMOR FREE	394	#N/A	[Not Available]	#N/A	#N/A	#N/A	#N/A	[Not Available]	Negative	#N/A	0	394	0	394	0	394	0	394
1221	TCGA-C8-A8HP	BRCA	59	FEMALE	ASIAN	Stage IIIA	[Not Applicable]	Metaplastic Carcinoma	[Not Available]	2013	Post (prior bilateral ovariectomy OR >12 mo since LMP with no prior hysterectomy)	-21613	Alive	TUMOR FREE	396	#N/A	[Not Available]	#N/A	#N/A	#N/A	#N/A	[Not Available]	Negative	#N/A	0	396	0	396	0	396	0	396
1222	TCGA-C8-A8HQ	BRCA	53	FEMALE	ASIAN	Stage IIB	[Not Applicable]	Mucinous Carcinoma	[Not Available]	2013	Post (prior bilateral ovariectomy OR >12 mo since LMP with no prior hysterectomy)	-19432	Alive	TUMOR FREE	380	#N/A	[Not Available]	#N/A	#N/A	#N/A	#N/A	[Not Available]	Negative	#N/A	0	380	0	380	0	380	0	380
1223	TCGA-C8-A8HR	BRCA	49	FEMALE	ASIAN	Stage IIIA	[Not Applicable]	Infiltrating Lobular Carcinoma	[Not Available]	2013	Peri (6-12 months since last menstrual period)	-17921	Alive	TUMOR FREE	408	#N/A	[Not Available]	#N/A	#N/A	#N/A	#N/A	[Not Available]	Negative	#N/A	0	408	0	408	0	408	0	408
1224	TCGA-C8-A9FZ	BRCA	49	FEMALE	WHITE	Stage IIB	[Not Applicable]	Mixed Histology (please specify)	[Not Available]	2013	Pre (<6 months since LMP AND no prior bilateral ovariectomy AND not on estrogen replacement)	-18038	Alive	TUMOR FREE	592	#N/A	[Not Available]	#N/A	#N/A	#N/A	#N/A	[Not Available]	Negative	#N/A	0	592	0	592	0	592	0	592
1225	TCGA-D8-A13Y	BRCA	52	FEMALE	WHITE	Stage IA	[Not Applicable]	Infiltrating Ductal Carcinoma	[Not Available]	2010	Post (prior bilateral ovariectomy OR >12 mo since LMP with no prior hysterectomy)	-19028	Alive	TUMOR FREE	1728	#N/A	[Not Available]	#N/A	#N/A	#N/A	#N/A	[Not Available]	Negative	#N/A	0	1728	0	1728	0	1728	0	1728
1226	TCGA-D8-A13Z	BRCA	51	FEMALE	WHITE	[Not Available]	[Not Applicable]	Infiltrating Ductal Carcinoma	[Not Available]	2010	Post (prior bilateral ovariectomy OR >12 mo since LMP with no prior hysterectomy)	-18942	Alive	TUMOR FREE	635	#N/A	[Not Available]	#N/A	#N/A	#N/A	#N/A	[Not Available]	Negative	#N/A	0	635	0	635	0	635	0	635
1227	TCGA-D8-A140	BRCA	62	FEMALE	WHITE	Stage IIB	[Not Applicable]	Infiltrating Ductal Carcinoma	[Not Available]	2010	Post (prior bilateral ovariectomy OR >12 mo since LMP with no prior hysterectomy)	-22900	Alive	TUMOR FREE	403	#N/A	[Not Available]	#N/A	#N/A	#N/A	#N/A	[Not Available]	Negative	#N/A	0	403	0	403	0	403	0	403
1228	TCGA-D8-A141	BRCA	40	FEMALE	WHITE	[Not Available]	[Not Applicable]	Infiltrating Ductal Carcinoma	[Not Available]	2010	Indeterminate (neither Pre or Postmenopausal)	-14626	Alive	TUMOR FREE	626	#N/A	[Not Available]	#N/A	#N/A	#N/A	#N/A	[Not Available]	Negative	#N/A	0	626	0	626	0	626	0	626
1229	TCGA-D8-A142	BRCA	74	FEMALE	WHITE	Stage IIB	[Not Applicable]	Infiltrating Ductal Carcinoma	[Not Available]	2010	Post (prior bilateral ovariectomy OR >12 mo since LMP with no prior hysterectomy)	-27313	Alive	TUMOR FREE	425	#N/A	[Not Available]	#N/A	#N/A	#N/A	#N/A	[Not Available]	Negative	#N/A	0	425	0	425	0	425	0	425
1230	TCGA-D8-A143	BRCA	51	FEMALE	WHITE	Stage IIA	[Not Applicable]	Infiltrating Ductal Carcinoma	[Not Available]	2010	Post (prior bilateral ovariectomy OR >12 mo since LMP with no prior hysterectomy)	-18984	Alive	TUMOR FREE	431	#N/A	[Not Available]	#N/A	#N/A	#N/A	#N/A	[Not Available]	Negative	#N/A	0	431	0	431	0	431	0	431
1231	TCGA-D8-A145	BRCA	80	FEMALE	WHITE	Stage IIA	[Not Applicable]	Infiltrating Ductal Carcinoma	[Not Available]	2010	Post (prior bilateral ovariectomy OR >12 mo since LMP with no prior hysterectomy)	-29280	Alive	TUMOR FREE	410	#N/A	[Not Available]	#N/A	#N/A	#N/A	#N/A	[Not Available]	Negative	#N/A	0	410	0	410	0	410	0	410
1232	TCGA-D8-A146	BRCA	57	FEMALE	WHITE	Stage IIA	[Not Applicable]	Infiltrating Ductal Carcinoma	[Not Available]	2010	Post (prior bilateral ovariectomy OR >12 mo since LMP with no prior hysterectomy)	-20861	Alive	TUMOR FREE	643	#N/A	[Not Available]	#N/A	#N/A	#N/A	#N/A	[Not Available]	Negative	#N/A	0	643	0	643	0	643	0	643
1233	TCGA-D8-A147	BRCA	45	FEMALE	WHITE	[Not Available]	[Not Applicable]	Infiltrating Ductal Carcinoma	[Not Available]	2010	Indeterminate (neither Pre or Postmenopausal)	-16736	Alive	TUMOR FREE	584	#N/A	[Not Available]	#N/A	#N/A	#N/A	#N/A	[Not Available]	Negative	#N/A	0	584	0	584	0	584	0	584
1234	TCGA-D8-A1J8	BRCA	77	FEMALE	WHITE	Stage IIB	[Not Applicable]	Infiltrating Ductal Carcinoma	[Not Available]	2010	Post (prior bilateral ovariectomy OR >12 mo since LMP with no prior hysterectomy)	-28444	Alive	TUMOR FREE	431	#N/A	[Not Available]	#N/A	#N/A	#N/A	#N/A	[Not Available]	Negative	#N/A	0	431	0	431	0	431	0	431
1235	TCGA-D8-A1J9	BRCA	48	FEMALE	WHITE	Stage IA	[Not Applicable]	Infiltrating Ductal Carcinoma	[Not Available]	2010	Post (prior bilateral ovariectomy OR >12 mo since LMP with no prior hysterectomy)	-17879	Alive	TUMOR FREE	532	#N/A	[Not Available]	#N/A	#N/A	#N/A	#N/A	[Not Available]	Negative	#N/A	0	532	0	532	0	532	0	532
1236	TCGA-D8-A1JA	BRCA	60	FEMALE	WHITE	[Not Available]	[Not Applicable]	Infiltrating Ductal Carcinoma	[Not Available]	2010	Post (prior bilateral ovariectomy OR >12 mo since LMP with no prior hysterectomy)	-21918	Alive	WITH TUMOR	502	#N/A	[Not Available]	Locoregional Disease	#N/A	#N/A	431	[Not Available]	Negative	#N/A	0	502	0	502	1	431	1	431
1237	TCGA-D8-A1JB	BRCA	54	FEMALE	WHITE	Stage IIB	[Not Applicable]	Infiltrating Ductal Carcinoma	[Not Available]	2010	Post (prior bilateral ovariectomy OR >12 mo since LMP with no prior hysterectomy)	-19822	Alive	TUMOR FREE	1688	#N/A	[Not Available]	#N/A	#N/A	#N/A	#N/A	[Not Available]	Negative	#N/A	0	1688	0	1688	0	1688	0	1688
1238	TCGA-D8-A1JC	BRCA	59	FEMALE	WHITE	Stage IIIA	[Not Applicable]	Infiltrating Ductal Carcinoma	[Not Available]	2010	Post (prior bilateral ovariectomy OR >12 mo since LMP with no prior hysterectomy)	-21898	Alive	TUMOR FREE	480	#N/A	[Not Available]	#N/A	#N/A	#N/A	#N/A	[Not Available]	Negative	#N/A	0	480	0	480	0	480	0	480
1239	TCGA-D8-A1JD	BRCA	41	FEMALE	WHITE	Stage IIB	[Not Applicable]	Infiltrating Ductal Carcinoma	[Not Available]	2010	Pre (<6 months since LMP AND no prior bilateral ovariectomy AND not on estrogen replacement)	-15166	Alive	TUMOR FREE	552	#N/A	[Not Available]	#N/A	#N/A	#N/A	#N/A	[Not Available]	Negative	#N/A	0	552	0	552	0	552	0	552
1240	TCGA-D8-A1JE	BRCA	62	FEMALE	WHITE	Stage IIA	[Not Applicable]	Infiltrating Ductal Carcinoma	[Not Available]	2010	Post (prior bilateral ovariectomy OR >12 mo since LMP with no prior hysterectomy)	-22683	Alive	TUMOR FREE	575	#N/A	[Not Available]	#N/A	#N/A	#N/A	#N/A	[Not Available]	Negative	#N/A	0	575	0	575	0	575	0	575
1241	TCGA-D8-A1JF	BRCA	79	FEMALE	WHITE	Stage IIIA	[Not Applicable]	Infiltrating Ductal Carcinoma	[Not Available]	2010	Post (prior bilateral ovariectomy OR >12 mo since LMP with no prior hysterectomy)	-29199	Alive	TUMOR FREE	366	#N/A	[Not Available]	#N/A	#N/A	#N/A	#N/A	[Not Available]	Negative	#N/A	0	366	0	366	0	366	0	366
1242	TCGA-D8-A1JG	BRCA	62	FEMALE	WHITE	Stage IIA	[Not Applicable]	Infiltrating Ductal Carcinoma	[Not Available]	2010	Post (prior bilateral ovariectomy OR >12 mo since LMP with no prior hysterectomy)	-22878	Alive	TUMOR FREE	1612	#N/A	[Not Available]	#N/A	#N/A	#N/A	#N/A	[Not Available]	Negative	#N/A	0	1612	0	1612	0	1612	0	1612
1243	TCGA-D8-A1JH	BRCA	56	FEMALE	WHITE	Stage IA	[Not Applicable]	Infiltrating Ductal Carcinoma	[Not Available]	2010	Post (prior bilateral ovariectomy OR >12 mo since LMP with no prior hysterectomy)	-20497	Alive	TUMOR FREE	426	#N/A	[Not Available]	#N/A	#N/A	#N/A	#N/A	[Not Available]	Negative	#N/A	0	426	0	426	0	426	0	426
1244	TCGA-D8-A1JI	BRCA	54	FEMALE	WHITE	Stage IIA	[Not Applicable]	Infiltrating Ductal Carcinoma	[Not Available]	2010	Post (prior bilateral ovariectomy OR >12 mo since LMP with no prior hysterectomy)	-20072	Alive	TUMOR FREE	577	#N/A	[Not Available]	#N/A	#N/A	#N/A	#N/A	[Not Available]	Negative	#N/A	0	577	0	577	0	577	0	577
1245	TCGA-D8-A1JJ	BRCA	54	FEMALE	WHITE	Stage IIA	[Not Applicable]	Infiltrating Ductal Carcinoma	[Not Available]	2010	Post (prior bilateral ovariectomy OR >12 mo since LMP with no prior hysterectomy)	-19966	Alive	TUMOR FREE	611	#N/A	[Not Available]	#N/A	#N/A	#N/A	#N/A	[Not Available]	Negative	#N/A	0	611	0	611	0	611	0	611
1246	TCGA-D8-A1JK	BRCA	90	FEMALE	WHITE	Stage IIA	[Not Applicable]	Infiltrating Ductal Carcinoma	[Not Available]	2010	Post (prior bilateral ovariectomy OR >12 mo since LMP with no prior hysterectomy)	-32872	Alive	TUMOR FREE	612	#N/A	[Not Available]	#N/A	#N/A	#N/A	#N/A	[Not Available]	Negative	#N/A	0	612	0	612	0	612	0	612
1247	TCGA-D8-A1JL	BRCA	72	FEMALE	WHITE	Stage IIA	[Not Applicable]	Infiltrating Ductal Carcinoma	[Not Available]	2010	Post (prior bilateral ovariectomy OR >12 mo since LMP with no prior hysterectomy)	-26484	Alive	TUMOR FREE	611	#N/A	[Not Available]	#N/A	#N/A	#N/A	#N/A	[Not Available]	Negative	#N/A	0	611	0	611	0	611	0	611
1248	TCGA-D8-A1JM	BRCA	59	FEMALE	WHITE	Stage IIB	[Not Applicable]	Infiltrating Ductal Carcinoma	[Not Available]	2010	Post (prior bilateral ovariectomy OR >12 mo since LMP with no prior hysterectomy)	-21602	Alive	TUMOR FREE	590	#N/A	[Not Available]	#N/A	#N/A	#N/A	#N/A	[Not Available]	Negative	#N/A	0	590	0	590	0	590	0	590
1249	TCGA-D8-A1JN	BRCA	80	FEMALE	WHITE	Stage IIIC	[Not Applicable]	Infiltrating Lobular Carcinoma	[Not Available]	2010	Post (prior bilateral ovariectomy OR >12 mo since LMP with no prior hysterectomy)	-29331	Alive	TUMOR FREE	620	#N/A	[Not Available]	#N/A	#N/A	#N/A	#N/A	[Not Available]	Negative	#N/A	0	620	0	620	0	620	0	620
1250	TCGA-D8-A1JP	BRCA	73	FEMALE	WHITE	Stage IA	[Not Applicable]	Infiltrating Ductal Carcinoma	[Not Available]	2010	Post (prior bilateral ovariectomy OR >12 mo since LMP with no prior hysterectomy)	-26862	Alive	TUMOR FREE	639	#N/A	[Not Available]	#N/A	#N/A	#N/A	#N/A	[Not Available]	Negative	#N/A	0	639	0	639	0	639	0	639
1251	TCGA-D8-A1JS	BRCA	77	FEMALE	WHITE	Stage IA	[Not Applicable]	Other, specify	[Not Available]	2010	Post (prior bilateral ovariectomy OR >12 mo since LMP with no prior hysterectomy)	-28178	Alive	TUMOR FREE	371	#N/A	[Not Available]	#N/A	#N/A	#N/A	#N/A	[Not Available]	Negative	#N/A	0	371	0	371	0	371	0	371
1252	TCGA-D8-A1JT	BRCA	70	FEMALE	WHITE	Stage IIA	[Not Applicable]	Other, specify	[Not Available]	2010	Post (prior bilateral ovariectomy OR >12 mo since LMP with no prior hysterectomy)	-25677	Alive	TUMOR FREE	405	#N/A	[Not Available]	#N/A	#N/A	#N/A	#N/A	[Not Available]	Negative	#N/A	0	405	0	405	0	405	0	405
1253	TCGA-D8-A1JU	BRCA	51	FEMALE	WHITE	Stage IA	[Not Applicable]	Infiltrating Ductal Carcinoma	[Not Available]	2010	Post (prior bilateral ovariectomy OR >12 mo since LMP with no prior hysterectomy)	-18733	Alive	TUMOR FREE	447	#N/A	[Not Available]	#N/A	#N/A	#N/A	#N/A	[Not Available]	Negative	#N/A	0	447	0	447	0	447	0	447
1254	TCGA-D8-A1X5	BRCA	81	FEMALE	WHITE	Stage IIIC	[Not Applicable]	Infiltrating Ductal Carcinoma	[Not Available]	2010	Post (prior bilateral ovariectomy OR >12 mo since LMP with no prior hysterectomy)	-29734	Alive	TUMOR FREE	565	#N/A	[Not Available]	#N/A	#N/A	#N/A	#N/A	[Not Available]	Negative	#N/A	0	565	0	565	0	565	0	565
1255	TCGA-D8-A1X6	BRCA	80	FEMALE	WHITE	Stage IIIA	[Not Applicable]	Infiltrating Ductal Carcinoma	[Not Available]	2010	Post (prior bilateral ovariectomy OR >12 mo since LMP with no prior hysterectomy)	-29256	Alive	TUMOR FREE	541	#N/A	[Not Available]	#N/A	#N/A	#N/A	#N/A	[Not Available]	Negative	#N/A	0	541	0	541	0	541	0	541
1256	TCGA-D8-A1X7	BRCA	40	FEMALE	WHITE	Stage IIA	[Not Applicable]	Other, specify	[Not Available]	2010	Pre (<6 months since LMP AND no prior bilateral ovariectomy AND not on estrogen replacement)	-14858	Alive	TUMOR FREE	509	#N/A	[Not Available]	#N/A	#N/A	#N/A	#N/A	[Not Available]	Negative	#N/A	0	509	0	509	0	509	0	509
1257	TCGA-D8-A1X8	BRCA	62	FEMALE	WHITE	Stage IIIA	[Not Applicable]	Infiltrating Lobular Carcinoma	[Not Available]	2010	Post (prior bilateral ovariectomy OR >12 mo since LMP with no prior hysterectomy)	-22995	Alive	TUMOR FREE	783	#N/A	[Not Available]	#N/A	#N/A	#N/A	#N/A	[Not Available]	Negative	#N/A	0	783	0	783	0	783	0	783
1258	TCGA-D8-A1X9	BRCA	66	FEMALE	WHITE	Stage IIB	[Not Applicable]	Infiltrating Ductal Carcinoma	[Not Available]	2010	Post (prior bilateral ovariectomy OR >12 mo since LMP with no prior hysterectomy)	-24417	Alive	TUMOR FREE	727	#N/A	[Not Available]	#N/A	#N/A	#N/A	#N/A	[Not Available]	[Not Available]	#N/A	0	727	0	727	#N/A	#N/A	0	727
1259	TCGA-D8-A1XA	BRCA	64	FEMALE	WHITE	Stage IA	[Not Applicable]	Infiltrating Ductal Carcinoma	[Not Available]	2010	Post (prior bilateral ovariectomy OR >12 mo since LMP with no prior hysterectomy)	-23387	Alive	TUMOR FREE	839	#N/A	[Not Available]	#N/A	#N/A	#N/A	#N/A	[Not Available]	Negative	#N/A	0	839	0	839	0	839	0	839
1260	TCGA-D8-A1XB	BRCA	62	FEMALE	WHITE	Stage IIB	[Not Applicable]	Infiltrating Ductal Carcinoma	[Not Available]	2010	Post (prior bilateral ovariectomy OR >12 mo since LMP with no prior hysterectomy)	-22976	Alive	TUMOR FREE	552	#N/A	[Not Available]	#N/A	#N/A	#N/A	#N/A	[Not Available]	Negative	#N/A	0	552	0	552	0	552	0	552
1261	TCGA-D8-A1XC	BRCA	85	FEMALE	WHITE	Stage IIIB	[Not Applicable]	Mucinous Carcinoma	[Not Available]	2010	Post (prior bilateral ovariectomy OR >12 mo since LMP with no prior hysterectomy)	-31220	Dead	WITH TUMOR	#N/A	377	[Not Available]	#N/A	#N/A	#N/A	#N/A	[Not Available]	Negative	#N/A	1	377	1	377	#N/A	#N/A	1	377
1262	TCGA-D8-A1XD	BRCA	36	FEMALE	WHITE	Stage IIIA	[Not Applicable]	Infiltrating Ductal Carcinoma	[Not Available]	2010	Pre (<6 months since LMP AND no prior bilateral ovariectomy AND not on estrogen replacement)	-13510	Alive	TUMOR FREE	522	#N/A	[Not Available]	#N/A	#N/A	#N/A	#N/A	[Not Available]	Negative	#N/A	0	522	0	522	0	522	0	522
1263	TCGA-D8-A1XF	BRCA	45	FEMALE	WHITE	Stage IIA	[Not Applicable]	Infiltrating Ductal Carcinoma	[Not Available]	2010	Pre (<6 months since LMP AND no prior bilateral ovariectomy AND not on estrogen replacement)	-16787	Alive	TUMOR FREE	463	#N/A	[Not Available]	#N/A	#N/A	#N/A	#N/A	[Not Available]	[Not Available]	#N/A	0	463	0	463	#N/A	#N/A	0	463
1264	TCGA-D8-A1XG	BRCA	86	FEMALE	WHITE	Stage IIIB	[Not Applicable]	Infiltrating Ductal Carcinoma	[Not Available]	2010	Post (prior bilateral ovariectomy OR >12 mo since LMP with no prior hysterectomy)	-31748	Alive	TUMOR FREE	448	#N/A	[Not Available]	#N/A	#N/A	#N/A	#N/A	[Not Available]	Negative	#N/A	0	448	0	448	0	448	0	448
1265	TCGA-D8-A1XJ	BRCA	76	FEMALE	WHITE	Stage IIIA	[Not Applicable]	Other, specify	[Not Available]	2010	Post (prior bilateral ovariectomy OR >12 mo since LMP with no prior hysterectomy)	-27967	Alive	TUMOR FREE	664	#N/A	[Not Available]	#N/A	#N/A	#N/A	#N/A	[Not Available]	Negative	#N/A	0	664	0	664	0	664	0	664
1266	TCGA-D8-A1XK	BRCA	55	FEMALE	WHITE	Stage IIB	[Not Applicable]	Infiltrating Ductal Carcinoma	[Not Available]	2010	Post (prior bilateral ovariectomy OR >12 mo since LMP with no prior hysterectomy)	-20092	Alive	TUMOR FREE	441	#N/A	[Not Available]	#N/A	#N/A	#N/A	#N/A	[Not Available]	Negative	#N/A	0	441	0	441	0	441	0	441
1267	TCGA-D8-A1XL	BRCA	34	FEMALE	WHITE	Stage IIB	[Not Applicable]	Infiltrating Ductal Carcinoma	[Not Available]	2010	Pre (<6 months since LMP AND no prior bilateral ovariectomy AND not on estrogen replacement)	-12668	Alive	TUMOR FREE	606	#N/A	[Not Available]	#N/A	#N/A	#N/A	#N/A	[Not Available]	Negative	#N/A	0	606	0	606	0	606	0	606
1268	TCGA-D8-A1XM	BRCA	57	FEMALE	WHITE	Stage IA	[Not Applicable]	Infiltrating Ductal Carcinoma	[Not Available]	2010	Post (prior bilateral ovariectomy OR >12 mo since LMP with no prior hysterectomy)	-21056	Alive	TUMOR FREE	538	#N/A	[Not Available]	#N/A	#N/A	#N/A	#N/A	[Not Available]	Negative	#N/A	0	538	0	538	0	538	0	538
1269	TCGA-D8-A1XO	BRCA	56	FEMALE	WHITE	Stage IIB	[Not Applicable]	Infiltrating Lobular Carcinoma	[Not Available]	2010	Post (prior bilateral ovariectomy OR >12 mo since LMP with no prior hysterectomy)	-20606	Alive	TUMOR FREE	1682	#N/A	[Not Available]	#N/A	#N/A	#N/A	#N/A	[Not Available]	Negative	#N/A	0	1682	0	1682	0	1682	0	1682
1270	TCGA-D8-A1XQ	BRCA	69	FEMALE	WHITE	Stage IIA	[Not Applicable]	Infiltrating Ductal Carcinoma	[Not Available]	2010	Post (prior bilateral ovariectomy OR >12 mo since LMP with no prior hysterectomy)	-25345	Alive	TUMOR FREE	499	#N/A	[Not Available]	#N/A	#N/A	#N/A	#N/A	[Not Available]	Negative	#N/A	0	499	0	499	0	499	0	499
1271	TCGA-D8-A1XR	BRCA	56	FEMALE	WHITE	Stage IIB	[Not Applicable]	Infiltrating Ductal Carcinoma	[Not Available]	2010	Post (prior bilateral ovariectomy OR >12 mo since LMP with no prior hysterectomy)	-20488	Alive	TUMOR FREE	482	#N/A	[Not Available]	#N/A	#N/A	#N/A	#N/A	[Not Available]	Negative	#N/A	0	482	0	482	0	482	0	482
1272	TCGA-D8-A1XS	BRCA	48	MALE	WHITE	Stage IIIC	[Not Applicable]	Other, specify	[Not Available]	2010	[Not Available]	-17708	Alive	TUMOR FREE	496	#N/A	[Not Available]	#N/A	#N/A	#N/A	#N/A	[Not Available]	Negative	#N/A	0	496	0	496	0	496	0	496
1273	TCGA-D8-A1XT	BRCA	61	FEMALE	WHITE	Stage IIA	[Not Applicable]	Infiltrating Ductal Carcinoma	[Not Available]	2010	Post (prior bilateral ovariectomy OR >12 mo since LMP with no prior hysterectomy)	-22448	Alive	TUMOR FREE	506	#N/A	[Not Available]	#N/A	#N/A	#N/A	#N/A	[Not Available]	Negative	#N/A	0	506	0	506	0	506	0	506
1274	TCGA-D8-A1XU	BRCA	56	FEMALE	WHITE	Stage IA	[Not Applicable]	Infiltrating Ductal Carcinoma	[Not Available]	2010	Post (prior bilateral ovariectomy OR >12 mo since LMP with no prior hysterectomy)	-20715	Alive	TUMOR FREE	395	#N/A	[Not Available]	#N/A	#N/A	#N/A	#N/A	[Not Available]	Negative	#N/A	0	395	0	395	0	395	0	395
1275	TCGA-D8-A1XV	BRCA	84	FEMALE	WHITE	Stage IIA	[Not Applicable]	Mucinous Carcinoma	[Not Available]	2010	Post (prior bilateral ovariectomy OR >12 mo since LMP with no prior hysterectomy)	-30830	Alive	TUMOR FREE	461	#N/A	[Not Available]	#N/A	#N/A	#N/A	#N/A	[Not Available]	Negative	#N/A	0	461	0	461	0	461	0	461
1276	TCGA-D8-A1XW	BRCA	53	FEMALE	WHITE	Stage IIA	[Not Applicable]	Infiltrating Ductal Carcinoma	[Not Available]	2011	Post (prior bilateral ovariectomy OR >12 mo since LMP with no prior hysterectomy)	-19478	Alive	TUMOR FREE	1309	#N/A	[Not Available]	#N/A	#N/A	#N/A	#N/A	[Not Available]	Negative	#N/A	0	1309	0	1309	0	1309	0	1309
1277	TCGA-D8-A1XY	BRCA	74	FEMALE	WHITE	Stage IIA	[Not Applicable]	Infiltrating Ductal Carcinoma	[Not Available]	2010	Post (prior bilateral ovariectomy OR >12 mo since LMP with no prior hysterectomy)	-27106	Alive	TUMOR FREE	503	#N/A	[Not Available]	#N/A	#N/A	#N/A	#N/A	[Not Available]	[Not Available]	#N/A	0	503	0	503	#N/A	#N/A	0	503
1278	TCGA-D8-A1XZ	BRCA	81	FEMALE	WHITE	Stage IIIA	[Not Applicable]	Infiltrating Ductal Carcinoma	[Not Available]	2010	Post (prior bilateral ovariectomy OR >12 mo since LMP with no prior hysterectomy)	-29916	Alive	TUMOR FREE	466	#N/A	[Not Available]	#N/A	#N/A	#N/A	#N/A	[Not Available]	Negative	#N/A	0	466	0	466	0	466	0	466
1279	TCGA-D8-A1Y0	BRCA	65	FEMALE	WHITE	Stage IIIA	[Not Applicable]	Infiltrating Ductal Carcinoma	[Not Available]	2010	Post (prior bilateral ovariectomy OR >12 mo since LMP with no prior hysterectomy)	-24083	Alive	TUMOR FREE	472	#N/A	[Not Available]	#N/A	#N/A	#N/A	#N/A	[Not Available]	[Not Available]	#N/A	0	472	0	472	#N/A	#N/A	0	472
1280	TCGA-D8-A1Y1	BRCA	80	FEMALE	WHITE	Stage IIIA	[Not Applicable]	Infiltrating Ductal Carcinoma	[Not Available]	2010	Post (prior bilateral ovariectomy OR >12 mo since LMP with no prior hysterectomy)	-29474	Dead	WITH TUMOR	#N/A	302	[Not Available]	#N/A	#N/A	#N/A	#N/A	[Not Available]	[Not Available]	#N/A	1	302	1	302	#N/A	#N/A	1	302
1281	TCGA-D8-A1Y2	BRCA	71	FEMALE	WHITE	Stage IIA	[Not Applicable]	Infiltrating Ductal Carcinoma	[Not Available]	2011	Post (prior bilateral ovariectomy OR >12 mo since LMP with no prior hysterectomy)	-26021	Alive	TUMOR FREE	433	#N/A	[Not Available]	#N/A	#N/A	#N/A	#N/A	[Not Available]	Negative	#N/A	0	433	0	433	0	433	0	433
1282	TCGA-D8-A1Y3	BRCA	61	FEMALE	WHITE	Stage IIIA	[Not Applicable]	Infiltrating Ductal Carcinoma	[Not Available]	2011	Post (prior bilateral ovariectomy OR >12 mo since LMP with no prior hysterectomy)	-22317	Alive	TUMOR FREE	430	#N/A	[Not Available]	#N/A	#N/A	#N/A	#N/A	[Not Available]	Negative	#N/A	0	430	0	430	0	430	0	430
1283	TCGA-D8-A27E	BRCA	66	FEMALE	WHITE	Stage IA	[Not Applicable]	Other, specify	[Not Available]	2010	Post (prior bilateral ovariectomy OR >12 mo since LMP with no prior hysterectomy)	-24315	Alive	TUMOR FREE	530	#N/A	[Not Available]	#N/A	#N/A	#N/A	#N/A	[Not Available]	Negative	#N/A	0	530	0	530	0	530	0	530
1284	TCGA-D8-A27F	BRCA	40	FEMALE	WHITE	Stage IIA	[Not Applicable]	Infiltrating Ductal Carcinoma	[Not Available]	2010	Pre (<6 months since LMP AND no prior bilateral ovariectomy AND not on estrogen replacement)	-14731	Alive	TUMOR FREE	488	#N/A	[Not Available]	#N/A	#N/A	#N/A	#N/A	[Not Available]	Negative	#N/A	0	488	0	488	0	488	0	488
1285	TCGA-D8-A27G	BRCA	75	FEMALE	WHITE	Stage IIA	[Not Applicable]	Infiltrating Lobular Carcinoma	[Not Available]	2010	Post (prior bilateral ovariectomy OR >12 mo since LMP with no prior hysterectomy)	-27521	Alive	TUMOR FREE	409	#N/A	[Not Available]	#N/A	#N/A	#N/A	#N/A	[Not Available]	Negative	#N/A	0	409	0	409	0	409	0	409
1286	TCGA-D8-A27H	BRCA	72	FEMALE	WHITE	Stage IIA	[Not Applicable]	Infiltrating Ductal Carcinoma	[Not Available]	2011	Post (prior bilateral ovariectomy OR >12 mo since LMP with no prior hysterectomy)	-26588	Alive	TUMOR FREE	397	#N/A	[Not Available]	#N/A	#N/A	#N/A	#N/A	[Not Available]	Negative	#N/A	0	397	0	397	0	397	0	397
1287	TCGA-D8-A27I	BRCA	58	FEMALE	WHITE	Stage IIIA	[Not Applicable]	Infiltrating Lobular Carcinoma	[Not Available]	2010	Post (prior bilateral ovariectomy OR >12 mo since LMP with no prior hysterectomy)	-21327	Alive	TUMOR FREE	439	#N/A	[Not Available]	#N/A	#N/A	#N/A	#N/A	[Not Available]	Negative	#N/A	0	439	0	439	0	439	0	439
[truncated: 9,873 more rows]

## Sheet: TCGA-CDR_Notes
Supplementary Material 3. Clinical data information of TCGA.
Recommended use of the endpoints:
[truncated: 31 more rows]

## Sheet: ExtraEndpoints
	bcr_patient_barcode	type	PFI.1	PFI.time.1	PFI.2	PFI.time.2	PFS	PFS.time	DSS_cr	DSS.time.cr	DFI.cr	DFI.time.cr	PFI.cr	PFI.time.cr	PFI.1.cr	PFI.time.1.cr	PFI.2.cr	PFI.time.2.cr
[truncated: 11,160 more rows]

[truncated: 5 more sheets: ExtraEndpoints_Notes, Table4_PHAssumptionTests, Table5_PHAssumptionTests, TSS_Info, Fig2EFG_AdditionalInfo]
