# Supplementary material for: Significance of CD8+ T cell infiltration-related biomarkers and the corresponding prediction model for the prognosis of kidney renal clear cell carcinoma
Source: Aging (Albany NY). 2021 Oct 4;13(19):22912–33. doi: 10.18632/aging.203584 (PMC8544304; doi:10.18632/aging.203584)
Supplement: Supplementary Table 1 [file aging-13-203584-s006.xls]

## Sheet: Table1_p19680
Supplementary Table 1. Summary of genes related to patient survival and prognosis.
	p_val	avg_logFC	pct.1	pct.2	p_val_adj		Survival analysis(p value)	HR	Cancer expression	Normal expression	Foldchange
Upregulated	PRKCH	7.49654e-07	1.01613	1	1	0.00740133	0.008	0.66	6.06	3.17	1.91
	RGCC	0.00865463	1.42264	1	1	1	0.00012	0.55	86.44	28.5	3.03
	TSPYL2	0.0265257	1.01667	1	1	1	0.0039	1.57	9.46	4.15	2.28
	SYTL2	6.46474e-05	1.25876	1	1	0.638264	0.023	1.42	8.79	7.02	1.25
	AUTS2	0.00489324	1.13464	1	1	1	6.1e-06	0.49	5.72	3.77	1.52
	GNLY	6.46453e-05	1.37925	1	1	0.638243	0.041	1.37	4.37	0.5	8.73
	RORA	5.4635e-05	1.30798	1	1	0.539412	4.4e-06	0.48	3.48	2.51	1.39
	FGFBP2	0.00025439	1.39114	1	1	1	0.008	0.66	2.13	0.57	3.74
	PIK3R1	0.00119201	1.02065	1	1	1	0.0013	0.6	10.26	10.74	0.96
	BTG3	0.0261894	1.36918	1	1	1	0.00017	1.8	8.49	12.43	0.68
	BEX5	0.00151724	1.22445	1	1	1	0.00059	0.58	6.09	11.17	0.55
	PDE4D	0.0408807	1.08883	1	1	1	0.003	0.63	3.5	4.22	0.83
Downregulated	DOK3	1.44265e-06	-1.9282	1	1	0.0142432	0.00014	1.82	3.14	0.51	6.17
	TMEM176B	0.000213611	-1.42352	1	1	1	0.0011	0.6	278.03	144.4	1.93
	TGFBI	0.00159711	-1.83188	1	1	1	0.0047	1.55	218.97	31.26	7
	ALDH1A1	0.00109191	-1.3056	1	1	1	0.0056	0.65	181.31	162.05	1.12
	PDK4	0.00011057	-1.66955	1	1	1	0.0011	0.6	171.06	108.46	1.58
	CTSZ	2.30217e-05	-1.00485	1	1	0.227294	0.0017	1.63	165.93	69.82	2.38
	CLIC4	0.000308476	-1.09855	1	1	1	2.2e-06	0.47	135.63	121.16	1.12
	HMOX1	0.00121288	-1.1379	1	1	1	0.0096	0.67	128.83	24.88	5.18
	CST3	7.32772e-05	-1.07069	1	1	0.723466	0.0089	1.5	81.22	53.34	1.52
	CD9	0.00223443	-1.46875	1	1	1	0.0019	0.62	69.56	110.32	0.63
	CD14	1.47307e-05	-2.6966	1	1	0.145436	0.024	1.42	63.02	18.82	3.35
	ASAH1	7.07434e-06	-1.45689	1	1	0.0698449	4.3e-07	0.45	59.87	94.32	0.63
	CTNNA1	1.68616e-05	-1.21499	1	1	0.166475	3.9e-06	0.48	57.22	62.09	0.92
	FCER1G	4.41756e-05	-1.68845	1	1	0.436145	0.0068	1.53	53.3	9.18	5.81
	FCGRT	0.000674834	-1.28803	1	1	1	0.00015	0.55	52.79	38.31	1.38
	SLC40A1	7.32797e-05	-1.35726	1	1	0.72349	5.7e-06	0.49	51.78	44.05	1.18
	TIMP2	1.84386e-05	-1.68511	1	1	0.182044	0.031	0.71	51.48	48.48	1.06
	CEBPD	0.000380206	-1.77718	1	1	1	0.0054	1.54	51.31	32.08	1.6
	CAT	2.74484e-05	-1.52825	1	1	0.270998	2.8e-07	0.45	50.51	123.54	0.41
	LAMP2	2.01569e-05	-1.03462	1	1	0.199009	0.018	0.69	49.64	48.08	1.03
	IER3	0.00227171	-2.23667	1	1	1	0.012	1.48	47.66	70	0.68
	SMPDL3A	0.00736009	-1.17606	1	1	1	0.0016	0.61	46.45	12.83	3.62
	METTL7A	7.63925e-05	-1.03232	1	1	0.754223	2.3e-08	0.41	46.14	80.88	0.57
	CD93	0.00056218	-1.44573	1	1	1	0.0017	0.61	45.22	21.3	2.12
	IMPA2	0.00019747	-2.55912	1	1	1	2.1e-07	0.44	43.36	47.28	0.92
	ACSL1	0.00132271	-1.42562	1	1	1	0.00099	0.6	42.17	73.27	0.58
	RALB	2.86754e-05	-1.22519	1	1	0.283112	5.9e-06	0.49	41.71	32.55	1.28
	IFNGR2	2.86754e-05	-1.47011	1	1	0.283112	0.0011	1.67	39.68	18.44	2.15
	S100A9	2.20263e-05	-2.3756	1	1	0.217465	0.027	1.41	39.16	18.62	2.1
	RBP7	2.99425e-05	-2.41472	1	1	0.295622	0.00046	0.58	35.96	20.28	1.77
	TNFAIP6	0.000503241	-1.94364	1	1	1	0.005	0.65	35.28	0.58	60.86
	TALDO1	0.000296927	-1.20565	1	1	1	0.028	1.41	35.27	39.12	0.9
	TYMP	0.000186156	-1.07049	1	1	1	0.0085	1.51	33.17	4.31	7.69
	SNX10	1.22928e-05	-1.55297	1	1	0.121367	0.004	1.58	32.75	13.98	2.34
	DPYSL2	0.00259114	-1.54167	1	1	1	0.0032	0.63	31.62	18.79	1.68
	FBP1	0.000320515	-1.52919	1	1	1	7.9e-06	0.5	25.28	122.68	0.21
	CTSH	0.00030851	-1.45506	1	1	1	0.034	0.72	25.06	60.78	0.41
	HSDL2	0.000779666	-1.25825	1	1	1	2.9e-06	0.48	24.91	40.04	0.62
	IFIT3	0.0108971	-1.67766	1	1	1	0.008	0.66	24.43	18.07	1.35
	CEBPB	0.000417711	-1.38501	1	1	1	2.8e-06	2.08	24.26	9.49	2.56
	FGL2	7.76409e-06	-2.52087	1	1	0.0766549	0.003	0.63	23.98	47.58	0.5
	CPVL	0.000387381	-2.04425	1	1	1	0.02	0.7	23.02	61.53	0.37
	TNFAIP2	0.000106171	-1.41037	1	1	1	0.04	1.37	20.51	8.32	2.47
	HNMT	4.91396e-05	-1.09534	1	1	0.485156	2.6e-06	0.48	20.49	18.51	1.11
	ATP6V1B2	6.7417e-05	-1.17538	1	1	0.665608	0.00092	0.6	20	23.53	0.85
	IL10RB	0.000135363	-1.13311	1	1	1	0.013	1.47	19.32	9.56	2.02
	SKAP2	4.23252e-05	-1.38229	1	1	0.417876	0.0034	0.63	18.07	17.05	1.06
	ALDH2	1.76336e-05	-1.35284	1	1	0.174097	0.0067	0.66	17.94	31.24	0.57
	RIN2	0.00119185	-1.31482	1	1	1	3.4e-06	0.47	17.62	15.38	1.15
	RNF19B	0.0100022	-1.01449	1	1	1	5.3e-06	0.49	16.05	14.45	1.11
	WLS	0.000152598	-1.19356	1	1	1	1.5e-05	0.5	16	43.94	0.36
	RBM47	4.0547e-05	-1.24925	1	1	0.400321	7.2e-06	0.49	15.24	32.42	0.47
	MFSD1	3.41247e-05	-1.06954	1	1	0.336913	0.0093	0.67	15.06	14.2	1.06
	SWAP70	0.00157025	-1.16272	1	1	1	5.4e-06	0.49	13.98	11.84	1.18
	MMP9	0.0227238	-1.36825	1	1	1	0.00082	1.69	13.89	0.85	16.36
	MPP1	0.000387443	-1.30577	1	1	1	0.023	0.7	13.82	9.93	1.39
	PRCP	1.92799e-05	-1.0047	1	1	0.19035	0.0023	0.62	13.59	16.79	0.81
	TKT	3.47858e-06	-1.19452	1	1	0.034344	0.0053	1.54	13.58	12.25	1.11
	MGST2	0.000808207	-1.13782	1	1	1	0.017	0.69	13.48	11.62	1.16
	IFIT1	0.000291237	-2.69133	1	1	1	0.00035	0.57	13.4	14.28	0.94
	TCIRG1	0.000948717	-1.02261	1	1	1	2.3e-08	2.42	13.35	4.78	2.8
	LY96	2.51416e-05	-2.40973	1	1	0.248223	0.016	1.63	13.25	4.17	3.18
	LRRK2	6.19898e-05	-2.38687	1	1	0.612026	9.3e-06	0.5	12.93	6.15	2.1
	LMO2	5.8653e-06	-1.40886	1	1	0.0579081	0.0025	0.62	12.88	14.6	0.88
	ALOX5	4.85759e-06	-1.76603	1	1	0.0479589	0.006	1.53	12.62	2.99	4.22
	CCNG2	4.05485e-05	-1.20542	1	1	0.400335	0.0057	0.65	12.42	13.79	0.9
	FCHO2	0.00105454	-1.13983	1	1	1	2.3e-08	0.41	12.39	11.78	1.05
	THBD	0.002903	-1.24293	1	1	1	0.042	0.73	12.3	10.83	1.14
	IRF7	5.4635e-05	-1.16015	1	1	0.539412	0.0004	1.74	10.91	3.26	3.35
	SNN	0.000106171	-1.04389	1	1	1	0.0021	0.62	10.72	16.1	0.67
	MAP7	0.00117127	-1.27773	1	1	1	2.3e-08	0.41	10.47	14.35	0.73
	CYP1B1	0.00144156	-2.6844	1	1	1	0.013	1.47	10.39	23.14	0.45
	BASP1	3.41235e-05	-1.51487	1	1	0.336901	0.0021	1.62	10.02	5.42	1.85
	PYCARD	0.00212597	-1.84267	1	1	1	0.00015	1.82	10	2.47	4.05
	KLF4	0.00021783	-1.65041	1	1	1	0.0018	0.61	9.74	8.84	1.1
	MEF2C	3.26769e-05	-1.64056	1	1	0.322619	0.024	0.7	9.23	3.69	2.5
	TMCC3	0.016979	-1.12622	1	1	1	4.2e-06	0.48	9.11	6.09	1.5
	CPPED1	2.86754e-05	-1.98984	1	1	0.283112	0.0012	0.6	9.1	11.48	0.79
	TBC1D9	0.000572587	-1.15248	1	1	1	1.7e-05	0.5	9.1	20.5	0.44
	GPR34	0.00309697	-1.10523	1	1	1	0.022	0.7	9.01	2.84	3.17
	PRRG4	0.000662673	-1.18369	1	1	1	0.0072	0.66	8.98	10.89	0.82
	ARFIP1	6.46517e-05	-1.02158	1	1	0.638306	2.7e-06	0.48	8.94	12.7	0.7
	DAPK1	5.46239e-05	-1.42246	1	1	0.539302	0.00075	0.59	8.85	10.67	0.83
	IL6R	0.0010004	-1.33541	1	1	1	0.0013	0.61	8.6	4.56	1.89
	LST1	4.01588e-06	-1.85973	1	1	0.0396488	0.019	1.44	8.57	1.81	4.74
	MGME1	0.000345867	-1.14993	1	1	1	0.0029	1.59	8.53	7.6	1.12
	ST8SIA4	0.000274958	-1.27308	1	1	1	0.0018	0.61	8.37	0.7	11.91
	RP2	0.000108336	-1.06314	1	1	1	0.0014	0.61	8.26	5.62	1.47
	IL1R2	0.0061521	-1.65512	1	1	1	0.00012	1.82	8.23	4.02	2.05
	LIN7A	4.91245e-05	-1.28249	1	1	0.485006	0.00013	0.55	8.14	4.71	1.73
	TLR4	2.86807e-06	-1.74437	1	1	0.0283164	0.0042	0.64	7.99	5.92	1.35
	GPR160	5.69915e-05	-1.64002	1	1	0.562677	0.00014	0.55	7.94	12.93	0.61
	AMPD2	0.000352492	-1.03138	1	1	1	1.8e-05	1.95	7.81	6.4	1.22
	CDK19	0.000119931	-1.17075	1	1	1	0.0069	0.66	7.31	4.66	1.57
	RAB24	3.72025e-05	-1.35542	1	1	0.367301	0.014	1.46	7.29	2.28	3.19
	NCF4	3.72052e-05	-2.40755	1	1	0.367327	0.00035	1.75	7.08	1.75	4.06
	MEGF9	2.57001e-05	-1.69052	1	1	0.253738	9e-07	0.46	7.04	12.76	0.55
	MGAM	0.0128939	-1.96594	1	1	1	1.9e-09	0.38	6.83	6.72	1.02
	DENND4B	0.0160827	-1.13488	1	1	1	0.00044	1.73	6.75	4.11	1.64
	STX7	1.84393e-05	-1.17968	1	1	0.182051	0.0029	0.63	6.55	6.92	0.95
	RNF141	6.1994e-05	-1.02924	1	1	0.612067	0.0015	0.61	6.39	9.76	0.65
	ZNF185	9.98495e-05	-1.30244	1	1	0.985814	0.0095	0.67	6.23	10.27	0.61
	TFEC	0.000326578	-1.48346	1	1	1	9.2e-05	0.55	5.99	4.06	1.48
	BID	0.000101925	-1.06437	1	1	1	0.0002	1.8	5.89	2.76	2.13
	TDRD7	0.00173849	-1.01038	1	1	1	1.6e-08	0.41	5.89	4.91	1.2
	SLC22A4	0.0113685	-1.70115	1	1	1	0.00012	0.55	5.74	2.64	2.18
	TNFSF13B	2.19453e-06	-2.43634	1	1	0.0216666	7.3e-05	1.87	5.7	1.02	5.61
	GPAT3	0.00615261	-1.45366	1	1	1	1.1e-05	0.5	5.53	31.92	0.17
	KDM1B	5.46239e-05	-1.06066	1	1	0.539302	0.016	0.69	5.47	5.67	0.96
	PLAUR	0.000793827	-1.22115	1	1	1	4.6e-07	2.23	5.47	1.9	2.88
	UBE2D1	5.46313e-05	-1.14993	1	1	0.539375	0.041	1.37	5.26	5.2	1.01
	ACAP2	0.000106171	-1.01693	1	1	1	0.0027	0.63	5.14	4.31	1.19
	KMO	0.000883655	-1.41433	1	1	1	0.04	1.37	5.14	3.89	1.32
	ATG4C	0.00504637	-1.1659	1	1	1	0.02	0.7	5.02	5.25	0.96
	REPS2	0.00113116	-1.01389	1	1	1	0.013	0.68	4.78	4.91	0.97
	PLAGL1	2.74454e-05	-1.19589	1	1	0.270968	0.046	1.36	4.45	1.85	2.41
	BCL2A1	0.00381119	-1.74615	1	1	1	0.038	1.38	4.23	0.74	5.69
	AQP9	0.00030851	-2.86649	1	1	1	6.1e-05	1.88	4.16	0.92	4.51
	FCER1A	0.000285729	-1.68171	1	1	1	2.6e-05	0.52	3.88	5.29	0.73
	RAB11FIP1	0.000158864	-1.15736	1	1	1	0.0017	0.61	3.51	6.96	0.5
	ATG16L2	0.00149181	-1.03107	1	1	1	0.0016	1.63	3.5	0.68	5.15
	P2RY13	1.5403e-05	-2.92712	1	1	0.152074	0.02	0.7	3.48	1.05	3.31
	BST1	0.000182479	-1.56813	1	1	1	0.012	0.68	3.33	3.27	1.02
	TLR1	2.40581e-05	-2.16807	1	1	0.237526	0.025	0.71	3.24	2.36	1.37
	JADE3	0.0308564	-1.03485	1	1	1	0.0028	0.63	3.09	3.57	0.87
	CSTA	5.86629e-06	-2.43136	1	1	0.0579179	0.023	1.42	2.82	0.58	4.83
	RMI1	0.000779722	-1.18124	1	1	1	0.035	0.72	2.8	3.2	0.87
	HSPA6	0.000124877	-1.87345	1	1	1	0.048	1.36	2.76	0.66	4.15
	FRAT2	5.94419e-05	-1.42106	1	1	0.58687	0.03	0.71	2.72	3.86	0.7
	FAR2	0.000433631	-1.07752	1	1	1	0.0063	0.65	2.55	1.39	1.84
	PTGS2	0.00246577	-3.85258	1	1	1	0.04	1.37	2.52	5.74	0.44
	FRY	0.000269693	-1.22279	1	1	1	0.00011	0.54	2.42	5.32	0.45
	TM6SF1	0.000254469	-1.77653	1	1	1	0.0034	0.63	2.08	1.04	2
	RNASE2	0.000143716	-2.0512	1	1	1	5e-05	1.89	2.04	0.39	5.28
	IRAK3	9.78062e-06	-1.03698	1	1	0.096564	0.014	0.68	1.9	1.02	1.86
	HK3	0.000175433	-1.56316	1	1	1	0.0011	1.66	1.85	0.31	5.94
	NABP1	0.00195578	-1.02882	1	1	1	4.2e-05	1.89	1.8	0.79	2.3
	HSPBAP1	0.000182528	-1.19339	1	1	1	0.0026	1.6	1.67	1.44	1.16
	PRKAR2B	0.0212874	-1.03984	1	1	1	0.029	1.4	1.57	7.46	0.21
	AIM2	0.00314756	-1.58644	1	1	1	0.0003	1.76	1.33	0.17	7.85
	SLC31A2	1.6859e-05	-1.4704	1	1	0.166449	3.1e-05	0.52	1.31	0.94	1.39
	PRAM1	9.78017e-05	-2.34288	1	1	0.965596	0.001	1.67	1.3	0.24	5.41
	MX2	0.00185983	-1.15949	1	1	1	0.00049	1.72	1.25	0.73	1.69
	PTX3	0.00308971	-1.22796	1	1	1	0.022	1.42	1.23	2.05	0.6
	CD1C	0.00544855	-1.28618	1	1	1	0.022	0.7	1.2	1.62	0.74
	LGALS2	0.000417678	-1.88864	1	1	1	0.0011	0.6	1.15	36.28	0.03
	HSH2D	0.00205601	-1.34827	1	1	1	0.00027	1.77	1.14	0.58	1.97
	MS4A14	0.00134556	-1.23123	1	1	1	0.00089	1.68	1.12	0.13	8.69
	CYSLTR1	4.63162e-06	-2.83424	1	1	0.045728	0.00016	0.55	1.09	0.49	2.24
	TREM1	0.000149621	-2.3314	1	1	1	0.005	1.55	1.05	0.25	4.28
	IL1RN	0.000837635	-1.13992	1	1	1	0.018	1.63	1.03	1.07	0.96
	NOD2	0.000172007	-1.43629	1	1	1	0.0019	1.62	0.94	0.18	5.31
	SLC22A15	0.0013685	-1.20747	1	1	1	0.0001	1.84	0.87	2.23	0.39
	ASGR1	0.00107295	-1.39082	1	1	1	3.2e-06	2.08	0.54	0.19	2.88
	NFE4	0.0324175	-1.07147	1	1	1	1.6e-06	2.11	0.5	0.04	13.11
	DGAT2	0.0006161	-1.05534	1	1	1	0.011	1.49	0.39	0.65	0.61
	CMTM2	7.63252e-05	-1.94577	1	1	0.753558	0.044	1.36	0.38	0.17	2.21
	MCEMP1	0.000493989	-1.55836	1	1	1	0.0082	1.51	0.35	0.08	4.08
	NFE2	3.19681e-05	-2.10229	1	1	0.315621	0.0063	1.53	0.31	0.21	1.46
	VSTM1	0.00176644	-1.45281	1	1	1	0.0077	1.51	0.17	0.06	2.8
	CLEC4D	5.46482e-06	-1.21972	1	1	0.0539542	0.016	1.46	0.16	0.09	1.78
	SLC24A4	0.00157015	-1.14796	1	1	1	0.0017	0.61	0.13	0.04	2.91
12 of 63 up-regulated and 162 of 396 down-regulated genes were found to be significantly correlated with the survival prognosis.
